# Supplementary material for: Dynamics of genomic innovation in the unicellular ancestry of animals
Source: eLife journal article supplement (doi:10.7554/elife.26036), 2017-07-20

Figure 3-Supplement 2

A. Shared TE families across Holozoa

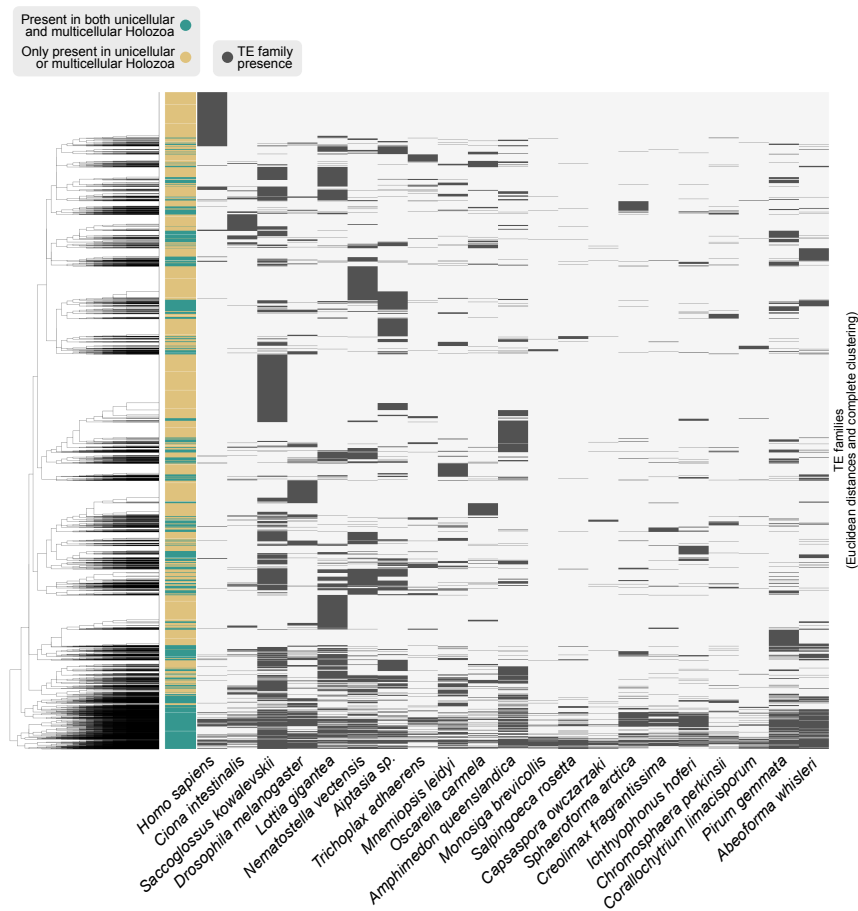

B. TE families present in >2 holozoan species (only families accounting for 25% of TE copies)

| # species | TE family        | present in Metazoa | present in unicellular Holozoa | Present in both |
|-----------|------------------|--------------------|--------------------------------|-----------------|
| 6         | Daphne-18_HM     | TRUE               | TRUE                           | TRUE            |
| 6         | IMPB_01          | TRUE               | TRUE                           | TRUE            |
| 5         | CR1-79_HM        | TRUE               | TRUE                           | TRUE            |
| 5         | Ginger1-1_AC     | TRUE               | TRUE                           | TRUE            |
| 4         | Ag-Jock-1        | TRUE               | TRUE                           | TRUE            |
| 4         | Gypsy-24_DEI-I   | TRUE               | TRUE                           | TRUE            |
| 4         | Novosib-6_CR     | TRUE               | TRUE                           | TRUE            |
| 4         | Penelope-1_DR    | TRUE               | TRUE                           | TRUE            |
| 4         | RTAg4            | TRUE               | TRUE                           | TRUE            |
| 4         | TART_DV          | TRUE               | TRUE                           | TRUE            |
| 3         | Coprina_Cc1      | TRUE               | TRUE                           | TRUE            |
| 3         | hAT-N4_ALy       | TRUE               | TRUE                           | TRUE            |
| 3         | R5-1_SM          | TRUE               | TRUE                           | TRUE            |
| 3         | REP-4_PBa        | TRUE               | TRUE                           | TRUE            |
| 3         | Sola1-1_AC       | TRUE               | TRUE                           | TRUE            |
| 3         | Sola3-1_BF       | TRUE               | TRUE                           | TRUE            |
| 3         | EnSpm-5_HM       | TRUE               | FALSE                          | FALSE           |
| 2         | DNA2-5_DR        | TRUE               | TRUE                           | TRUE            |
| 2         | DNA8-5_DR        | TRUE               | TRUE                           | TRUE            |
| 2         | EnSpm-34_SBi     | TRUE               | TRUE                           | TRUE            |
| 2         | hAT-N144_DR      | TRUE               | TRUE                           | TRUE            |
| 2         | Penelope-13_HM   | TRUE               | TRUE                           | TRUE            |
| 2         | Polinton-2A_NV   | TRUE               | TRUE                           | TRUE            |
| 2         | Polinton-2_HM    | TRUE               | TRUE                           | TRUE            |
| 2         | Polinton-8_NVi   | TRUE               | TRUE                           | TRUE            |
| 2         | DNA-N4_DR        | FALSE              | TRUE                           | FALSE           |
| 2         | ENSPM-6_DR       | TRUE               | FALSE                          | FALSE           |
| 2         | Gypsy-20_CSa-I   | TRUE               | FALSE                          | FALSE           |
| 2         | Kolobok-1_AQu    | TRUE               | FALSE                          | FALSE           |
| 2         | Kolobok-3_Apical | TRUE               | FALSE                          | FALSE           |

C. Distribution of TE family presence per species (all families)

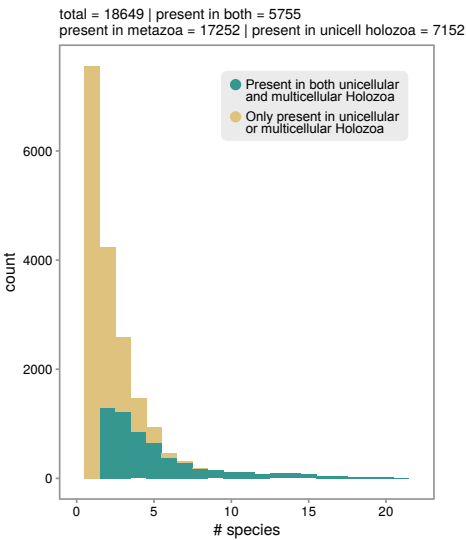

D. Distribution of TE family presence per species (only families accounting for 75% of TE copies)

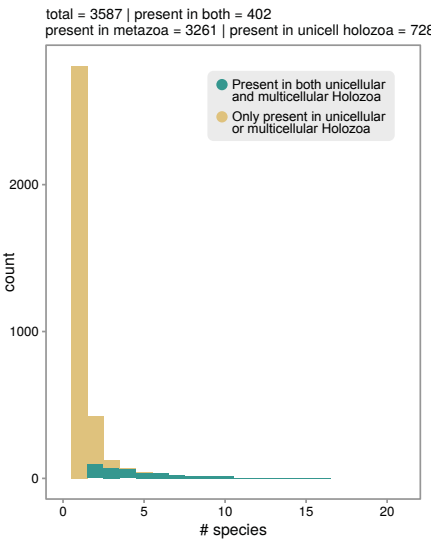

E. Distribution of TE family presence per species (only families accounting for 25% of TE copies)

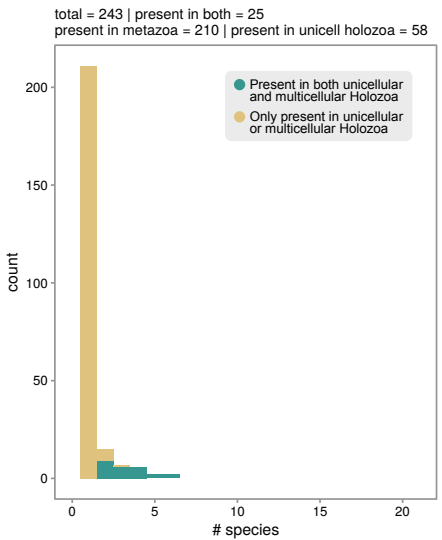

Supplement: supp [file elife-26036-supp-v1.zip]
