# Supplementary material for: Dynamics of genomic innovation in the unicellular ancestry of animals
Source: eLife journal article supplement (doi:10.7554/elife.26036), 2017-07-20

Figure 2-Supplement 1

A. Phylogenomic analysis: BVD57, ML (LG+R7+C60)

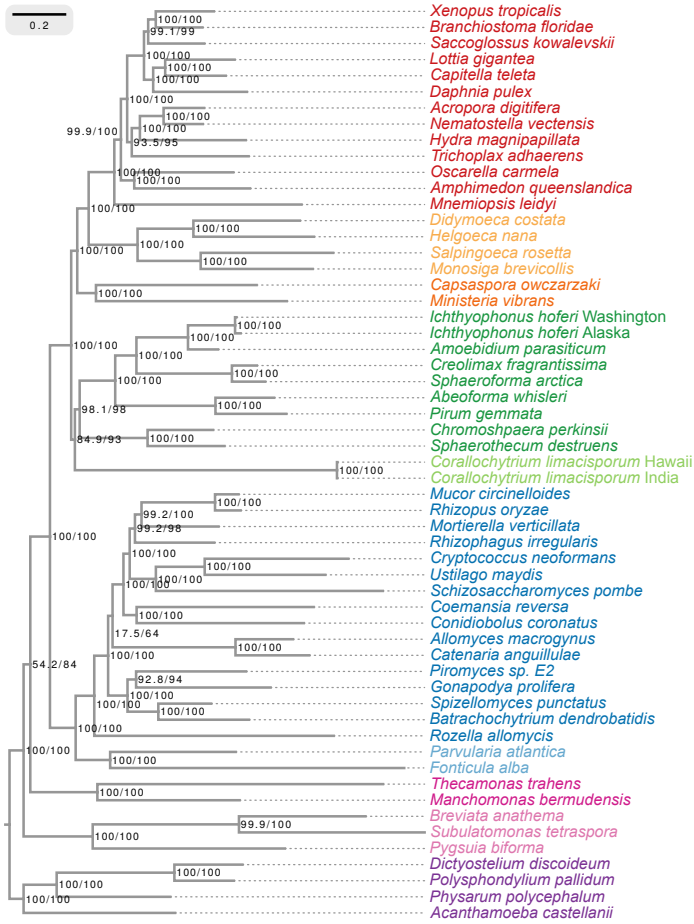

B. Phylogenomic analysis: BVD57, ML (LG+R7+PMSF)

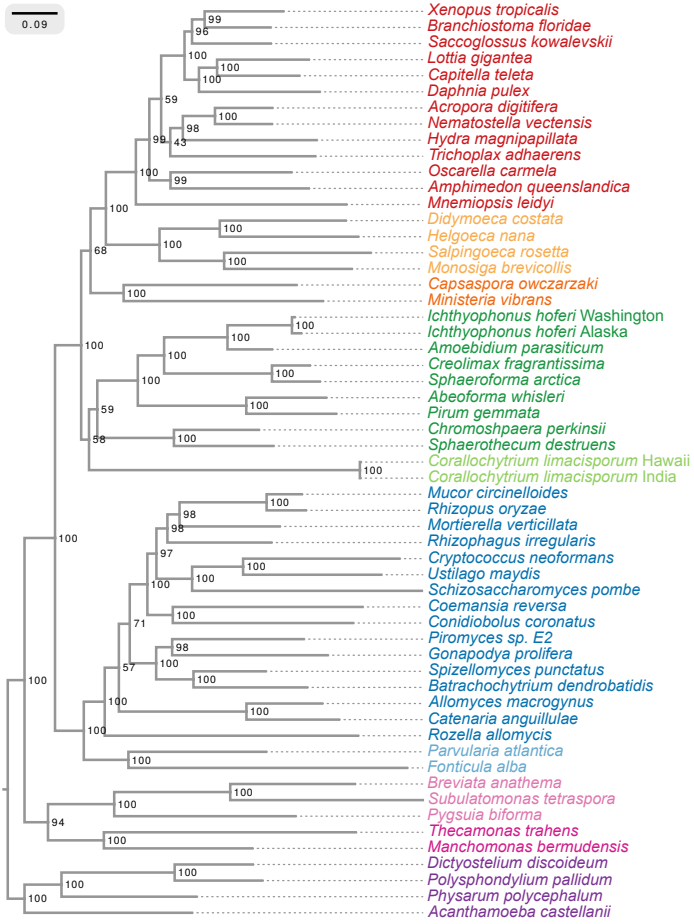

C. Phylogenomic analysis: BVD57, BI (LG+Γ7+CAT)

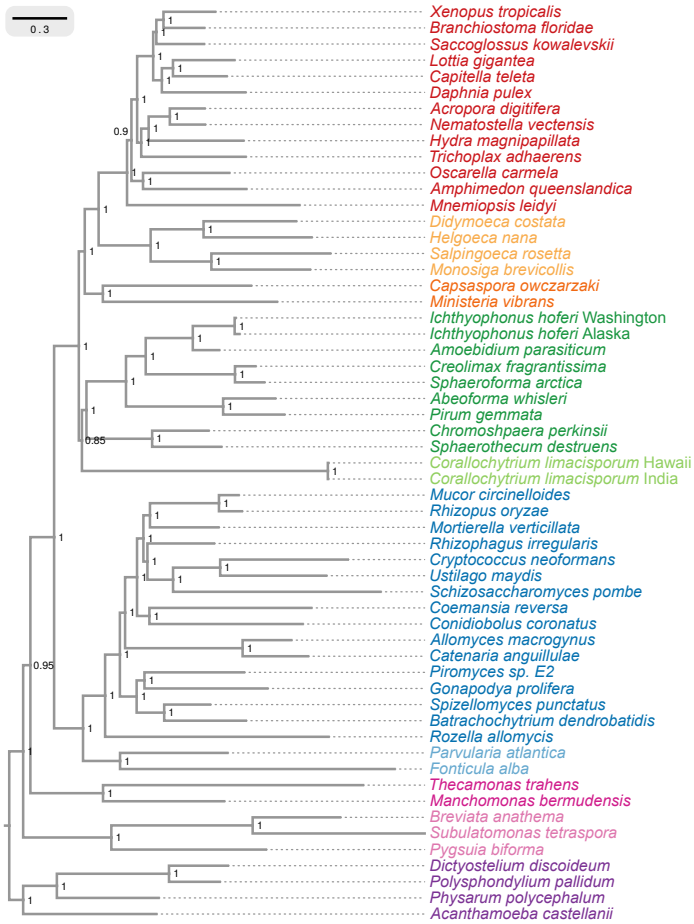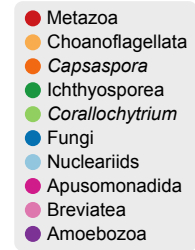

Supplement: supp [file elife-26036-supp-v1.zip]
