# Supplementary material for: Dynamics of genomic innovation in the unicellular ancestry of animals
Source: eLife journal article supplement (doi:10.7554/elife.26036), 2017-07-20
Supplement: supp [file elife-26036-supp-v1.zip]

Archive with 25 entries (25 files):
- elife_poa_e26036_Figure_5_Source_Data_4.odt
- elife_poa_e26036_Figure_3_Figure_Supplement_2.pdf
- elife_poa_e26036_Figure_2_Source_Data_11.csv
- elife_poa_e26036_Figure_9_Figure_Supplement_1.pdf
- elife_poa_e26036_Figure_1_Source_Data_8.odt
- elife_poa_e26036_Figure_7_Source_Data_6.odt
- elife_poa_e26036_Figure_5_Figure_Supplement_3.pdf
- elife_poa_e26036_Figure_3_Source_Data_2.odt
- elife_poa_e26036_Figure_3_Figure_Supplement_1.pdf
- elife_poa_e26036_Figure_1_Figure_Supplement_1.pdf
- elife_poa_e26036_Figure_2_Source_Data_10.odt
- elife_poa_e26036_Figure_5_Source_Data_5.odt
- elife_poa_e26036_Figure_3_Figure_Supplement_3.pdf
- elife_poa_e26036_Figure_7_Figure_Supplement_1.pdf
- elife_poa_e26036_Figure_8_Figure_Supplement_1.pdf
- elife_poa_e26036_Figure_2_Figure_Supplement_1.pdf
- elife_poa_e26036_Figure_5_Source_Data_12.odt
- elife_poa_e26036_Figure_7_Source_Data_9.odt
- elife_poa_e26036_Table_1_Source_Data_13.odt
- elife_poa_e26036_Figure_5_Figure_Supplement_1.pdf
- elife_poa_e26036_Figure_1_Source_Data_1.odt
- elife_poa_e26036_Figure_5_Figure_Supplement_2.pdf
- elife_poa_e26036_Figure_3_Source_Data_3.odt
- elife_poa_e26036_Figure_3_Source_Data_14.odt
- elife_poa_e26036_Figure_7_Source_Data_7.odt
