# Supplementary material for: Dynamics of genomic innovation in the unicellular ancestry of animals
Source: eLife journal article supplement (doi:10.7554/elife.26036), 2017-07-20
Supplement: supp [file elife-26036-supp-v1.zip › elife_poa_e26036_Figure_1_Source_Data_1.odt]

## Sheet: Sheet1
	NOTE: mean, Q1, Q2, Q3 and sum values are in bp
				Gene						Exon						Intron						Intergenic
	o	sp	genome size	gene_n	gene_sum	gene_mean	gene_Q1	gene_Q2	gene_Q3	exon_n	exon_sum	exon_mean	exon_Q1	exon_Q2	exon_Q3	intron_n	intron_sum	intron_mean	intron_Q1	intron_Q2	intron_Q3	intergenic_n	intergenic_sum	intergenic_Q1	intergenic_Q2	intergenic_Q3
	1	Hsap	3159.44	22447	1041279392	46388.4	3971	14657	43959	215001	37114038	172.623	85	123	172	192554	1003780246	5212.98	440	1406	3735	19021	2118157685	7442	23268	71975
	2	Cint	116.31	16671	57655590	3458.44	975	2113	4312	107347	15992569	148.98	88	127	169	90676	41481669	457.471	198	323	483	16848	58654726	910	1978	4268
	3	Bflo	923.35	50817	463295914	9116.95	1900	4932	10995	356631	72376871	202.946	95	136	194	305811	390308021	1276.3	339	531	1031	53481	460051903	1611	3817	8949
	4	Skow	775.94	20943	259123406	12372.8	2347	6796	15589	157817	30977737	196.289	93	135	196	136874	227871921	1664.83	320	660	1448	74984	516814547	843	1432	5965
	5	Spur	970.52	28842	313713392	10877	2041	5664	12548	186994	40821539	218.304	97	141	208	157677	272646436	1729.15	490	738	1283	55610	656808124	851	2758	11736
	6	Dmel	144.99	13917	62367884	4481.42	794	1541	3163	55106	22314225	404.933	128	216	476	41189	39971281	970.436	59	68	264	14906	82622467	596	1296	3774
	7	Dpul	197.20	30590	61661302	2015.73	628	1172	2193	142164	29878404	210.169	88	146	230	111574	31559750	282.859	64	74	140	35618	135540122	552	1419	3947
	8	Cele	101.07	20447	56996994	2787.55	1040	1785	3189	124639	25025927	200.787	98	144	232	104192	31762683	304.848	47	62	321	19896	44076718	460	997	2419
	9	Lgig	359.53	23340	117731586	5044.2	1045	2689	5994	140249	26645273	189.985	88	129	187	116909	90852495	777.121	250	366	607	27713	241794910	1508	3618	8934
	10	Ctel	333.26	32175	84661299	2631.28	812	1632	3327	171418	34127501	199.089	89	134	204	139243	50255312	360.918	52	60	256	52835	248594959	1093	2291	5880
	11	Nvec	356.61	24773	110098445	4444.29	734	2300	5872	131666	24745593	187.942	76	117	198	106893	85139066	796.489	231	436	819	35422	246508583	1211	3636	7995
	12	Aipt	277.88	29271	162420008	5548.84	1644	3463	6961	212739	45193707	212.437	72	116	207	183468	116859365	636.947	131	278	551	31019	115461899	910	2048	4519
	13	Tadh	105.63	11520	39861249	3460.18	1388	2627	4469	96959	15560971	160.49	70	101	153	85439	24129400	282.417	93	133	256	12912	65768253	1274	2548.5	5311
	14	Mlei	158.02	16058	86419040	5381.68	1058	2480.5	6857	88550	22120134	249.804	101	138	198	72492	64153922	884.979	172	275	741	20105	71598790	1002	1801	4435
	15	Ocar	57.76	11152	21899136	1963.7	648	1294	2509	73725	13838125	187.699	73	109	176	62573	7935865	126.826	51	55	65	78701	35865018	113	165	471
	16	Aque	169.21	29883	69441937	2323.79	673	1343	2777	166744	34975159	209.754	74	118	194	136861	34193056	249.838	50	76	220	40204	99767420	215	885	2365
	17	Scil	362.42	26105	168619082	6459.26	635	2596	8744	140348	33278195	237.112	80	125	219	114243	135112401	1182.68	381	654	1247	30245	193801935	1479	3521	8094
	18	Mbre	41.63	9172	26696301	2910.63	1244	2076.5	3543	69022	16455146	238.404	79	119	207	59850	10121455	169.114	92	112	146	9353	14930792	479	823	1549
	19	Sros	55.43	11624	45015635	3872.65	1653	2876.5	4909	98139	23096940	235.349	74	108	178	86515	21745665	251.351	178	222	274	11759	10413975	319	539	865
	20	Cowc	27.97	8741	21479783	2457.36	1276	2042	3138	46820	18374528	392.45	83	153	348	32468	5042235	155.299	85	103	137	8790	6487965	229	373	772
	21	Sarc	121.57	18319	42617150	2326.39	425	1173	3024	64003	16190643	252.967	104	153	233	45684	26335139	576.463	263	454	730	33868	78952872	458	901	2123
	22	Cfra	44.82	8694	31141231	3581.92	1487	2614	4553	65960	13652038	206.974	94	134	195	57266	17374661	303.403	178	267	388	8749	13678246	732	1208	2006
	23	Ihof	88.08	6351	28753089	4527.33	822	2978	6233	49243	6780597	137.697	78	106	148	42892	21886708	510.275	273	417	641	7983	59324777	2301	5256	9159
	24	Awhi	101.89	17283	12156951	703.405	231	435	909	26238	10004103	381.283	151	220	414	8955	2134938	238.407	116	196	307	91904	89736065	290	671	1256
	25	Pgem	84.44	21835	12160633	556.933	219	347	677	30224	10800598	357.352	158	230.5	402	8389	1343257	160.121	57	122	212	100578	72283954	247	433	910
	26	Nk52	36.89	12463	21488970	1724.22	731	1322	2104	20267	20265250	999.914	205	537	1352	7804	1208112	154.807	85	99	121	24488	15405281	178	327	652
	27	Clim	24.11	7535	12049005	1599.07	797	1280	2003	7915	11979608	1513.53	695	1205	1925	380	68637	180.624	49	94	178	7822	12058767	262	774	1823
	28	Spom	12.63	5144	7586353	1474.8	755	1216	1843	10210	7161745	701.444	105	306	986	5066	414476	81.8152	45	55	84	5118	5046106	400	687	1161
	29	Ncra	39.22	9820	16641091	1694.61	894	1422.5	2142	26926	14299118	531.052	91	239	691	17106	2307761	134.909	64	83	152	10070	22575185	812	1397.5	2459
	30	Scer	12.41	6692	9136400	1365.27	560	1082	1769	7050	9024126	1280.02	464	1022	1718	0	0	0	0	0	0	6011	3273549	234	361	620
	31	Cneo	18.89	6962	13235150	1901.06	1039	1613	2393	43483	10878032	250.167	78	144	288	36521	2284076	62.5414	50	54	62	6967	5649921	285	491	911
	32	Umay	19.74	6522	12596500	1931.39	986	1574	2473	11420	11969650	1048.13	149	567	1574	4898	617054	125.981	62	94	145	6792	7141316	380	721	1331
	33	Mver	41.84	12457	24174169	1940.61	992	1634	2473	46528	19283486	414.449	107	213	485	34071	4822541	141.544	87	99	123	12512	17667523	315	733	1691
	34	Rory	46.13	17459	21153316	1211.6	527	938	1511	57974	17908243	308.901	79	165	358	40515	3164043	78.0956	50	56	76	17540	24978103	467	952	1843
	35	Amac	57.04	18773	31547956	1680.5	830	1383	2121	62549	26965189	431.105	107	233	516	43776	4495215	102.687	68	74	85	18864	25494148	396	694	1356
	36	Spun	24.12	8952	16909361	1888.89	942	1484.5	2324	51990	13847970	266.358	85	144	277	43038	2975315	69.1323	59	64	70	8987	7212890	225	419	899
	37	Rirr	90.35	29822	32866659	1102.09	452	852	1430	102015	23980070	235.064	72	139	267	72193	8742203	121.095	70	78	94	57498	57479556	203	669	1415
	38	Gpro	48.79	13902	23092681	1661.1	806	1389	2138	75719	17208445	227.267	80	143	263	61811	5763269	93.2402	60	67	84	14148	25695153	240	539	1354
	39	Rall	11.89	6350	8365231	1317.36	575	987	1647	26973	7394395	274.141	93	162	308	20623	929590	45.0754	26	28	38	6973	3520287	84	235	594
	40	Falb	31.21	5881	17293707	2940.61	1209	2143	3786	27818	12038287	432.752	113	215	471	21937	5211546	237.569	118	151	199	6090	13917034	606	1203	2565
	41	Ttra	28.67	10544	22489124	2132.88	1001	1535	2576	19878	20522994	1032.45	128	683	1424	9334	1947462	208.642	48	114	275	10652	6181655	111	321	724
	42	Ddis	34.12	13212	23351661	1767.46	740	1352	2288	30000	21013853	700.462	143	320	826	16788	2304232	137.255	85	103	137	13219	10772904	297	572	1017
	43	Ppal	32.96	12367	25303910	2046.08	925	1590	2596	45714	19122692	418.312	93	219	484	33347	6114524	183.361	71	87	166	12409	7653909	194	389	764
	44	Ppol	209.36	42765	57701987	1349.28	378	708	1381	122905	34769087	282.894	96	155	317	80140	22772620	284.16	91	183	337	113842	151658335	198	317	678
	45	Ehis	20.83	8113	10393358	1281.07	626	991	1571	10634	10210394	960.165	329	668	1278	2521	177922	70.576	49	56	69	9595	10434462	138	372	1271
	46	Acas	42.02	14973	29450402	1966.9	846	1526	2534	105758	19592426	185.257	87	126	195	90785	9676406	106.586	76	92	117	15261	12568265	175	352	730
	47	Atha	119.70	27416	51157287	1865.96	895	1555	2400	140573	33180942	236.041	83	132	245	113157	17750031	156.862	84	97	155	27312	68545168	611	1204	2473
	48	Bdis	271.90	26552	75630342	2848.39	1118	2158.5	3708	133333	33886804	254.152	83	134	256	106781	41529976	388.927	93	146	468	26635	196266412	1600	3558	7965
	49	Smoe	212.62	34799	57035832	1639.01	829	1335	2008	197233	40866453	207.199	80	125	215	162434	15844511	97.5443	51	57	71	35504	155579693	440	1172	3268
	50	Ppat	479.97	32273	65486096	2029.13	491	1403	2775	149804	33950213	226.631	83	138	245	117531	31300821	266.32	146	208	304	34359	414486114	1395	3704	12427
	51	Crei	120.46	14416	58725603	4073.64	1318	2710	4992	119091	19515614	163.871	73	115	179	104675	39000639	372.588	164	237	362	15877	61733525	833	1708	3903
	52	Vcar	131.48	14971	65175154	4353.43	1413	3163	5799	107310	27148414	252.991	94	148	253	92339	37842062	409.817	204	339	512	14816	66308538	574	1629.5	4319
	53	Cvar	46.16	9791	28654304	2926.6	1334	2260	3731	81308	13780153	169.481	82	120	184	71516	14731131	205.984	132	170	218	10122	17509148	349	689	1728
	54	Mpus	22.02	10672	16939883	1587.32	787	1257	1952	20628	15028317	728.54	213	476	942	0	0	0	0	0	0	10266	5080813	137	260	536
	55	Cmer	16.55	4803	7443912	1549.85	818	1274	1928	4830	7437192	1539.79	809	1259	1916	27	6666	246.889	115	233	276	4751	9106041	713	1543	2709
	56	Pyez	43.47	10327	9839787	952.821	398	695	1240	13848	8766631	633.061	230	434	808	3521	1066114	302.787	197	253	337	52395	33633849	253	399	723
	57	Cpar	70.19	11011	16573018	1505.13	506	899	1679	71602	9938696	138.805	62	96	153	60591	6513140	107.494	57	66	85	71109	53617990	185	415	938
	58	Esil	195.95	18435	114266502	6198.35	1930	4631	8576	136440	27054090	198.286	94	136	200	0	0	0	0	0	0	19364	81681836	977	2248	4326
	59	Tpse	32.43	11674	19569434	1676.33	839	1314	2044	29327	17394944	593.138	155	376	788	0	0	0	0	0	0	11724	12856537	329	639	1330
	60	Pinf	228.53	17785	26276108	1477.43	680	1126	1798	49144	22373137	455.257	89	209	529	31359	3840253	122.461	62	72	104	22693	202250928	388	1566	6595
	61	Alai	38.60	13804	24401669	1767.72	526	1071	2007	43008	18847947	438.243	92	184	426	29204	5495314	188.17	51	55	62	15959	14195203	153	350	938
	62	Tgon	63.00	7988	35852022	4488.24	1456	3201.5	6096	42490	17801342	418.954	98	167	364	0	0	0	0	0	0	8293	27145689	1575	2535	3917
	63	Tthe	102.99	24725	62562727	2530.34	905	1796	3329	114059	48013956	420.957	98	215	493	89334	14370103	160.858	56	84	183	25883	40426923	674	1120	1837
	64	Bnat	94.68	21706	59241592	2729.27	1077	1932	3517	188833	28568464	151.29	53	77	136	167127	30338874	181.532	91	151	227	21928	35439971	650	1067	1817
	65	Rfil	101.83	39963	43219597	1081.49	575	864	1325	100640	37994827	377.532	144	279	484	60677	5103416	84.1079	46	77	115	87328	58607485	108	485	890
	66	Ehux	167.64	38544	61854506	1604.78	665	1132	2003	134733	39528040	293.381	80	167	377	96189	22134088	230.11	74	122	224	46215	105788643	538	1330	2839
	67	Gthe	87.25	24945	44670002	1790.74	707	1275	2240	157632	30430537	193.048	55	82	153	132687	13974091	105.316	46	52	115	25536	42575689	420	1057	2104
	68	Ngru	40.95	15709	25762397	1639.98	788	1232	1937	26397	23582038	893.361	289	624	1178	10688	2158983	202.001	44	57	117	16457	15187879	193	398	851
	69	Bsal	39.85	13300	29168359	2193.11	935	1538	2627	17891	27651516	1545.55	641	1151	1952	4591	1507661	328.395	45	189	392	15546	10682735	181	332	790
	70	Tcru	89.59	19607	29251011	1491.87	668	1109	1829	19610	29247774	1491.47	668	1109	1829	3	3231	1077	302	1459	1470	50172	60341890	577	900	1142
	71	Lmaj	32.85	8308	15698191	1889.53	833	1400	2288	8312	15692860	1887.98	833	1400	2288	4	5323	1330.75	1	434	867	8344	17148596	936	1441	2407
	72	Glam	11.63	7364	9749240	1323.91	293	761	1745	7368	9748840	1323.13	293	761	1745	4	392	98	31	71	108	5255	1884621	43	102	314
