# Supplementary material for: Dynamics of genomic innovation in the unicellular ancestry of animals
Source: eLife journal article supplement (doi:10.7554/elife.26036), 2017-07-20
Supplement: supp [file elife-26036-supp-v1.zip › elife_poa_e26036_Figure_1_Source_Data_8.odt]

## Sheet: Full1
	Result summary														Rates
Species or LCA name	node code	node order	Ancestor? (0/1)	node age (order)	contraction	expansion	gain	loss	multi	present	percentage gain	percentage loss	Log(gain/loss)	gain-loss	Gain (t)	Duplication (lambda)	Loss (mu)	Transfer (kappa)		Note: gains, duplications and transfers normalized to loss=1
Homo sapiens	Hsap	1	0	1	117.991	1464.79	450.703	569.828	2704	6648	6.78%	8.57%	-0.1019	-119.13	0.2405	1.8335	1.0000	0.1461
Ciona intestinalis	Cint	2	0	1	177.026	613.53	519.692	1251.82	1758	6035	8.61%	20.74%	-0.3818	-732.13	0.1912	1.8335	1.0000	0.1461		|variation	duplication	1	1	0
Chordata	CHORD	3	1	2	24.4964	113.982	90.7424	131.898	1234.51	6763.13	1.34%	1.95%	-0.1624	-41.16	0.0192	1.8335	1.0000	0.1461		|variation	loss	1	1	0
Saccoglossus kowalevskii	Skow	4	0	1	95.1016	1091.44	1326.96	367.244	2437	7768	17.08%	4.73%	0.5579	959.72	0.3404	1.8335	1.0000	0.1461		|variation	transfer	1	1	0
Deuterostomia	DEUTERO	5	1	3	7.89705	46.3788	70.2889	26.3733	1141.62	6804.28	1.03%	0.39%	0.4257	43.92	0.0082	1.8335	1.0000	0.1461		|variation	length	1	1
Drosophila melanogaster	Dmel	6	0	1	198.122	505.448	322.985	1840.18	1433	5252	6.15%	35.04%	-0.7557	-1517.20	0.2781	1.8335	1.0000	0.1461		|root	Poisson	0.173949272
Lottia gigantea	Lgig	7	0	1	100.078	926.815	1975.57	462.771	2497	8283	23.85%	5.59%	0.6303	1512.80	0.3890	1.8335	1.0000	0.1461
Protostomia	PROTOS	8	1	3	5.79279	16.8667	24.5701	18.7363	1113.88	6766.2	0.36%	0.28%	0.1177	5.83	0.0036	1.8335	1.0000	0.1461
Bilateria	BILATERIA	9	1	4	39.1213	84.3682	231.502	88.5645	1102.09	6760.36	3.42%	1.31%	0.4173	142.94	0.0276	1.8335	1.0000	0.1461
Nematostella vectensis	Nvec	10	0	1	455.367	1309.59	1689.4	549.762	3667	9375	18.02%	5.86%	0.4876	1139.64	0.3032	1.8335	1.0000	0.1461
Aiptasia sp.	Aipt	11	0	1	495.642	1418.72	968.697	698.063	3539	8506	11.39%	8.21%	0.1423	270.63	0.4063	1.8335	1.0000	0.1461
Cnidaria	CNIDARIA	12	1	4	99.2062	1049.46	1909.13	295.191	2297.09	8231.37	23.19%	3.59%	0.8107	1613.94	0.2387	1.8335	1.0000	0.1461
Bilateria+Cnidaria	EUMET	13	1	5	40.8432	168.968	536.048	43.2851	1053.68	6617.43	8.10%	0.65%	1.0929	492.76	0.0508	1.8335	1.0000	0.1461
Trichoplax	Tadh	14	0	1	114.612	483.688	476.982	960.647	1336	5645	8.45%	17.02%	-0.3041	-483.67	0.2053	1.8335	1.0000	0.1461
Bilateria+Cnidaria+Placozoa	EUMPLA	15	1	6	33.5024	127.282	331.632	62.9873	914.011	6124.66	5.41%	1.03%	0.7214	268.64	0.0359	1.8335	1.0000	0.1461
Mnemiopsis leidyi	Mlei	16	0	1	110.57	660.002	938.395	1406.41	1656	5392	17.40%	26.08%	-0.1757	-468.02	0.4222	1.8335	1.0000	0.1461
Oscarella carmela	Ocar	17	0	1	223.149	595.31	780.658	1850.47	1444	4774	16.35%	38.76%	-0.3748	-1069.81	0.3411	1.8335	1.0000	0.1461
Amphimedon queenslandica	Aque	18	0	1	124.265	1579.43	1528.29	762.103	2944	6610	23.12%	11.53%	0.3022	766.19	0.7304	1.8335	1.0000	0.1461
Porifera	PORIFERA	19	1	6	40.9763	179.787	146.549	162.761	965.058	5839.81	2.51%	2.79%	-0.0456	-16.21	0.0341	1.8335	1.0000	0.1461
Metazoa	METAZOA	20	1	7	71.6123	241.814	930.98	299.105	815.175	5856.02	15.90%	5.11%	0.4931	631.88	0.1121	1.8335	1.0000	0.1461
Monosiga brevicollis	Mbre	21	0	1	122.22	221.342	338.818	822.196	974	5038	6.73%	16.32%	-0.3850	-483.38	0.1307	1.8335	1.0000	0.1461
Salpingoeca rosetta	Sros	22	0	1	73.8245	426.157	546.015	331.393	1263	5737	9.52%	5.78%	0.2169	214.62	0.1226	1.8335	1.0000	0.1461
Choanoflagellata	CHOANOS	23	1	4	63.8005	266.689	814.068	519.835	841.772	5518.38	14.75%	9.42%	0.1948	294.23	0.1068	1.8335	1.0000	0.1461
Metazoa+Choanoflagellata	CHOAZOA	24	1	7	33.5135	119.129	422.403	190.021	601.632	5224.14	8.09%	3.64%	0.3469	232.38	0.0513	1.8335	1.0000	0.1461
Capsaspora owczarzaki	Cowc	25	0	1	54.7494	412.308	691.86	844.623	960	4843	14.29%	17.44%	-0.0866	-152.76	0.2034	1.8335	1.0000	0.1461
Filozoa (Met+Cho+Capsaspora)	FILOZOA	26	1	8	12.3573	66.0812	236.796	94.3517	502.31	4991.76	4.74%	1.89%	0.3996	142.44	0.0305	1.8335	1.0000	0.1461
Sphaeroforma arctica	Sarc	27	0	1	121.694	1116.42	930.719	361.865	2287	6393	14.56%	5.66%	0.4103	568.85	0.2654	1.8335	1.0000	0.1461
Crelimax fragrantissima	Cfra	28	0	1	29.2067	41.3104	43.087	52.2325	1089	5814	0.74%	0.90%	-0.0836	-9.15	0.0101	1.8335	1.0000	0.1461
Sphaeroforma+Creolimax	ICCFSA	29	1	2	89.6241	428.492	1720.23	431.584	1073.37	5820.15	29.56%	7.42%	0.6005	1288.65	0.2128	1.8335	1.0000	0.1461
Ichthyophonus hoferi	Ihof	30	0	1	140.145	361.872	373.088	1510.59	810	3398	10.98%	44.46%	-0.6073	-1137.50	0.2079	1.8335	1.0000	0.1461
Ichthyophonida	ICHPHO	31	1	3	50.6818	147.712	307.337	581.248	589.416	4531.5	6.78%	12.83%	-0.2767	-273.91	0.0706	1.8335	1.0000	0.1461
Chromosphaera perkinsi	Nk52	32	0	1	36.1836	561.097	1242.2	501.61	1234	5550	22.38%	9.04%	0.3938	740.59	0.2462	1.8335	1.0000	0.1461
Ichthyosporea	ICHTHY	33	1	4	3.32221	12.1106	27.9702	29.5635	483.584	4805.41	0.58%	0.62%	-0.0241	-1.59	0.0046	1.8335	1.0000	0.1461
Corallochytrium limacisporum	Clim	34	0	1	47.4069	333.687	629.568	889.572	844	4550	13.84%	19.55%	-0.1501	-260.00	0.1521	1.8335	1.0000	0.1461
Teretosporea	TERETO	35	1	5	8.83868	37.7413	106.734	149.049	474.587	4807	2.22%	3.10%	-0.1450	-42.32	0.0164	1.8335	1.0000	0.1461
Holozoa	HOLOZOA	36	1	9	8.84368	54.1066	243.926	100.793	444.857	4849.32	5.03%	2.08%	0.3838	143.13	0.0267	1.8335	1.0000	0.1461
Schizosaccharomyces pombe	Spom	37	0	1	88.4465	226.741	123.149	837.626	669	3352	3.67%	24.99%	-0.8326	-714.48	0.1071	1.8335	1.0000	0.1461
Neurospora crassa	Ncra	38	0	1	63.3437	288.577	578.387	252.865	911	4392	13.17%	5.76%	0.3593	325.52	0.1425	1.8335	1.0000	0.1461
Ascomycota	ASCOMY	39	1	2	34.0772	46.751	102.234	149.985	559.662	4063.48	2.52%	3.69%	-0.1665	-47.75	0.0274	1.8335	1.0000	0.1461
Cryptococcus neoformans	Cneo	40	0	1	62.7889	200.183	260.976	423.204	742	3953	6.60%	10.71%	-0.2099	-162.23	0.0943	1.8335	1.0000	0.1461
Dikarya	DIKARYA	41	1	3	103.571	95.9573	256.942	841.561	545.71	4111.23	6.25%	20.47%	-0.5153	-584.62	0.1005	1.8335	1.0000	0.1461
Mortierella verticillata	Mver	42	0	1	39.1894	895.925	810.198	636.046	1685	4874	16.62%	13.05%	0.1051	174.15	0.3554	1.8335	1.0000	0.1461
Spizellomyces punctatus	Spun	43	0	1	41.1217	447.257	881.108	429.956	1049	5150	17.11%	8.35%	0.3116	451.15	0.1697	1.8335	1.0000	0.1461
Gonapodya prolifera	Gpro	44	0	1	54.9021	704.669	1120.67	652.515	1543	5168	21.68%	12.63%	0.2349	468.16	0.3657	1.8335	1.0000	0.1461
Fungi	FUNGI	45	1	7	36.2041	160.633	493.56	271.068	555.029	4695.85	10.51%	5.77%	0.2603	222.49	0.0694	1.8335	1.0000	0.1461
Fonticula alba	Falb	46	0	1	97.4385	199.652	254.331	1572.69	504	3159	8.05%	49.78%	-0.7912	-1318.36	0.2123	1.8335	1.0000	0.1461
Holomycota	HOLOMYC	47	1	8	30.1471	44.5232	100.122	332.952	411.873	4473.36	2.24%	7.44%	-0.5219	-232.83	0.0348	1.8335	1.0000	0.1461
Opisthokinta	OPISTO	48	1	10	16.4517	36.9962	158.67	179.184	398.258	4706.19	3.37%	3.81%	-0.0528	-20.51	0.0227	1.8335	1.0000	0.1461
Thecamonas trahens	Ttra	49	0	1	26.8249	651.655	1104.8	1010.5	1188	4824	22.90%	20.95%	0.0387	94.30	0.2709	1.8335	1.0000	0.1461
Obazoa (Opistho+Apusomonadida)	OBAZOA	50	1	11	3.08865	15.1128	44.7559	44.6387	375.61	4726.7	0.95%	0.94%	0.0011	0.12	0.0069	1.8335	1.0000	0.1461
Dictyostelium discoideum	Ddis	51	0	1	151.598	325.365	264.382	203.217	1273	5370	4.92%	3.78%	0.1143	61.17	0.1303	1.8335	1.0000	0.1461
Polysphondylium pallidum	Ppal	52	0	1	201.698	355.425	292.572	342.407	1264	5259	5.56%	6.51%	-0.0683	-49.84	0.1977	1.8335	1.0000	0.1461
Dictyostelia	DICTYOS	53	1	2	149.707	416.718	1249.92	688.994	1053.12	5304.83	23.56%	12.99%	0.2587	560.93	0.2376	1.8335	1.0000	0.1461
Acanthamoeba castellanii	Acas	54	0	1	116.475	942.302	1253.88	858.789	1904	5143	24.38%	16.70%	0.1644	395.09	0.4212	1.8335	1.0000	0.1461
Amoebozoa	AMOEBO	55	1	5	22.4118	314.954	433.716	416.386	681.8	4743.91	9.14%	8.78%	0.0177	17.33	0.0993	1.8335	1.0000	0.1461
Unikonta/Amorphea	UNIK	56	1	12	2.96042	27.4585	53.525	51.1324	363.537	4726.58	1.13%	1.08%	0.0199	2.39	0.0089	1.8335	1.0000	0.1461
Arabidopsis thaliana	Atha	57	0	1	621.305	828.406	513.001	672.331	3096	6111	8.39%	11.00%	-0.1175	-159.33	0.4567	1.8335	1.0000	0.1461
Physcomitrella patens	Ppat	58	0	1	300.991	1196.58	633.733	278.063	3833	6626	9.56%	4.20%	0.3578	355.67	0.2629	1.8335	1.0000	0.1461
Embryophyta/Land plants	EMBPHY	59	1	4	131.793	1511.06	1736.65	686.052	2758.8	6266.33	27.71%	10.95%	0.4034	1050.60	0.4928	1.8335	1.0000	0.1461
Chlamydomonas reinhardtii	Crei	60	0	1	170.426	546.822	852.621	682.951	1560	5491	15.53%	12.44%	0.0964	169.67	0.2232	1.8335	1.0000	0.1461
Chlorella variabilis	Cvar	61	0	1	165.309	425.141	520.323	658.654	1333	5182	10.04%	12.71%	-0.1024	-138.33	0.1625	1.8335	1.0000	0.1461
Chlorophyta	CHLORO	62	1	4	99.9128	182.892	344.605	242.002	996.063	5318.33	6.48%	4.55%	0.1535	102.60	0.0584	1.8335	1.0000	0.1461
Viridiplantae	VIRIDI	63	1	5	59.362	413.28	952.332	492.166	901.459	5215.73	18.26%	9.44%	0.2867	460.17	0.1448	1.8335	1.0000	0.1461
Toxoplasma gondii	Tgon	64	0	1	164.522	237.175	342.088	1349.9	652	3090	11.07%	43.69%	-0.5962	-1007.81	0.2301	1.8335	1.0000	0.1461
Tetrahymena thermophila	Tthe	65	0	1	123.559	784.35	1019.17	1134.98	1606	3982	25.59%	28.50%	-0.0467	-115.81	0.7458	1.8335	1.0000	0.1461
Alveolata	ALVEO	66	1	5	79.7194	167.414	132.911	786.607	595.131	4094.81	3.25%	19.21%	-0.7722	-653.70	0.0841	1.8335	1.0000	0.1461
Bigelowiella natans	Bnat	67	0	1	30.1757	1350.3	2269.27	596.782	2354	6425	35.32%	9.29%	0.5801	1672.49	0.4665	1.8335	1.0000	0.1461
Ectocarpus siliculosus	Esil	68	0	1	187.751	770.481	1172.59	629.424	1706	5574	21.04%	11.29%	0.2702	543.17	0.3331	1.8335	1.0000	0.1461
Phytophthora infestans	Pinf	69	0	1	201.331	816.726	1104.22	902.047	1846	5234	21.10%	17.23%	0.0878	202.17	0.4749	1.8335	1.0000	0.1461
Stramenopila/Heterokonta	STRAM	70	1	5	39.9893	406.566	563.857	284.534	914.141	5027.83	11.21%	5.66%	0.2970	279.32	0.1106	1.8335	1.0000	0.1461
SAR (Stram+Alveolata+Rhizaria)	SAR	71	1	6	4.68802	16.0557	30.5001	37.5541	507.061	4748.51	0.64%	0.79%	-0.0904	-7.05	0.0058	1.8335	1.0000	0.1461
Bikonta/Diaphoratickes	BIKONT	72	1	12	21.8363	173.318	400.007	368.635	495.612	4755.56	8.41%	7.75%	0.0355	31.37	0.0709	1.8335	1.0000	0.1461
Naegleria gruberi	Ngru	73	0	1	23.8143	794.2	1137.95	1172.14	1537	4693	24.25%	24.98%	-0.0129	-34.19	0.4080	1.8335	1.0000	0.1461
Ancestral eukaryote (root)	LECA	74	1	13	0	0	0	0	338.81	4724.19	0.00%	0.00%
