# Supplementary material for: Dynamics of genomic innovation in the unicellular ancestry of animals
Source: eLife journal article supplement (doi:10.7554/elife.26036), 2017-07-20
Supplement: supp [file elife-26036-supp-v1.zip › elife_poa_e26036_Figure_2_Source_Data_10.odt]

## Sheet: Full1
Species name	Abbreviation	Type of data		Source of data	Taxonomy
Homo sapiens	Hsap	Genome	40 sps dataset	Ensembl 80	Chordata	Bilateria	Metazoa
Ciona intestinalis	Cint	Genome	40 sps dataset	Ensembl 80	Chordata	Bilateria	Metazoa
Branchiostoma floridae	Bflo	Genome	Extended dataset	Ensembl 80	Chordata	Bilateria	Metazoa
Saccoglossus kowalevskii	Skow	Genome	40 sps dataset	Simakov 2015 Nature 10.1038/nature16150	Ambulacraria	Bilateria	Metazoa
Drosophila melanogaster	Dmel	Genome	40 sps dataset	Ensembl Metazoa 27	Ecdysozoa	Bilateria	Metazoa
Daphnia pulex	Dpul	Genome	Extended dataset	Ensembl Metazoa 27	Ecdysozoa	Bilateria	Metazoa
Caenorhabditis elegans	Cele	Genome	Extended dataset	Ensembl Metazoa 27	Ecdysozoa	Bilateria	Metazoa
Capitella teleta	Ctel	Genome	Extended dataset	Ensembl Metazoa 27	Lophotrochozoa	Bilateria	Metazoa
Lottia gigantea	Lgig	Genome	40 sps dataset	Ensembl Metazoa 27	Lophotrochozoa	Bilateria	Metazoa
Aiptasia sp.	Aipt	Genome	40 sps dataset	Baumgarten 2015 PNAS 10.1073/pnas.1513318112		Cnidaria	Metazoa
Nematostella vectensis	Nvec	Genome	40 sps dataset	Ensembl Metazoa 27		Cnidaria	Metazoa
Acropora digitifera	Adig	Genome	Extended dataset	OIST		Cnidaria	Metazoa
Hydra magnipapillata (or vulgaris)	Hmag	Genome	Extended dataset	NCBI		Cnidaria	Metazoa
Trichoplax adhaerens	Tadh	Genome	40 sps dataset	Ensembl Metazoa 27		Placozoa	Metazoa
Mnemiopsis leidyi	Mlei	Genome	40 sps dataset	Ensembl Metazoa 27		Ctenophora	Metazoa
Sycon ciliatum	Scil	Genome	Extended dataset	Fortunato 2014 Nature 10.1038/nature13881	Calcisponge	Porifera	Metazoa
Leucosolenia complicata	Lcom	Transcriptome	Extended dataset	Fortunato 2014 Nature 10.1038/nature13881	Calcisponge	Porifera	Metazoa
Oscarella carmela	Ocar	Genome	40 sps dataset	Nichols 2012 PNAS 10.1073/pnas.1120685109	Homoscleromorpha	Porifera	Metazoa
Amphimedon queenslandica	Aque	Genome	40 sps dataset	Ensembl Metazoa 27	Demospongiae	Porifera	Metazoa
Monosiga brevicollis	Mbre	Genome	40 sps dataset	Ensembl Protist 27		Craspedida	Choanoflagellata
Salpingoeca rosetta	Sros	Genome	40 sps dataset	Ensembl Protist 27		Craspedida	Choanoflagellata
Ministeria vibrans	Mvib	Transcriptome	Extended dataset	Torruella 2015 CB 10.1016/j.cub.2015.07.053			Filasterea
Capsaspora owczarzaki	Cowc	Genome	40 sps dataset	Suga 2013 Nature Communications 10.1038/ncomms3325			Filasterea
Sphaeroforma arctica	Sarc	Genome	40 sps dataset	Broad Institute Multicellularity Initiative	Ichthyophonida	Ichthyosporea	Teretosporea
Creolimax fragrantissima	Cfra	Genome	40 sps dataset	de Mendoza 2015, eLIFE 10.7554/eLife.08904	Ichthyophonida	Ichthyosporea	Teretosporea
Abeoforma whisleri	Awhi	Genome	Extended dataset	NEW	Ichthyophonida	Ichthyosporea	Teretosporea
Pirum gemmata	Pgem	Genome	Extended dataset	NEW	Ichthyophonida	Ichthyosporea	Teretosporea
Amoebidium parasiticum	Apar	Transcriptome	Extended dataset	Torruella 2015 CB 10.1016/j.cub.2015.07.053	Ichthyophonida	Ichthyosporea	Teretosporea
Ichthyophonus hoferi	Ihof	Genome	40 sps dataset	Torruella 2015 CB 10.1016/j.cub.2015.07.053	Ichthyophonida	Ichthyosporea	Teretosporea
Sphaerothecum destruens	Sdes	Transcriptome	Extended dataset	Torruella 2015 CB 10.1016/j.cub.2015.07.053	Dermocystida	Ichthyosporea	Teretosporea
Chromoshpaera perkinsii	Nk52	Genome	40 sps dataset	NEW	Dermocystida	Ichthyosporea	Teretosporea
Corallochytrium limacisporum	Clim	Genome	40 sps dataset	NEW		Corallochytrea	Teretosporea
Schizosaccharomyces pombe	Spom	Genome	40 sps dataset	Ensembl Fungi 27	Ascomycota	Dikarya	Fungi
Neurospora crassa	Ncra	Genome	40 sps dataset	Ensembl Fungi 27	Ascomycota	Dikarya	Fungi
Cryptococcus neoformans	Cneo	Genome	40 sps dataset	Ensembl Fungi 27	Basidiomycota	Dikarya	Fungi
Ustilago maydis	Umay	Genome	Extended dataset	Ensembl Fungi 27	Basidiomycota	Dikarya	Fungi
Mortierella verticillata	Mver	Genome	40 sps dataset	Ensembl Fungi 27	incertae sedis		Fungi
Rhizopus oryzae	Rory	Genome	Extended dataset	JGI MycoCosm	Mucoromycotina		Fungi
Allomyces macrogynus	Amac	Genome	Extended dataset	Ensembl Fungi 27	Blastocladiomycota		Fungi
Spizellomyces punctatus	Spun	Genome	40 sps dataset	Ensembl Fungi 27	Chytridiomycota		Fungi
Rhizophagus irregularis	Rirr	Genome	Extended dataset	Ensembl Fungi 27	Glomeromycota		Fungi
Rozella allomycis	Rall	Genome	Extended dataset	Ensembl Fungi 27	Cryptomycota		Fungi
Gonapodya prolifera	Gpro	Genome	40 sps dataset	Ensembl Fungi 27	Monoblepharidomyocta		Fungi
Parvularia atlantica (former Nuclearia spp.)	Nspp	Transcriptome	Extended dataset	Torruella 2015 CB 10.1016/j.cub.2015.07.053			Discicristoidea
Fonticula alba	Falb	Genome	40 sps dataset	Ensembl Protist 27			Discicristoidea
Thecamonas trahens	Ttra	Genome	40 sps dataset	Ensembl Protist 27			Apusozoa
Pygsuia biforma	Pbif	Genome	Extended dataset	Torruella 2015 CB 10.1016/j.cub.2015.07.053			Breviatea
Nutomonas longa	Nlon	Genome	Extended dataset	Torruella 2015 CB 10.1016/j.cub.2015.07.053			Ancyromonad
Dictyostelium discoideum	Ddis	Genome	40 sps dataset	Ensembl Protist 27		Mycetozoa	Amoebozoa
Polysphondylium pallidum	Ppal	Genome	40 sps dataset	Ensembl Protist 27		Mycetozoa	Amoebozoa
Acanthamoeba castellanii	Acas	Genome	40 sps dataset	Ensembl Protist 27		Centramoebida	Amoebozoa
Arabidopsis thaliana	Atha	Genome	40 sps dataset	Ensembl Plants 27		Embryophyta	Viridiplantae
Selaginella moellendorffii	Smoe	Genome	Extended dataset	Ensembl Plants 27		Embryophyta	Viridiplantae
Physcomitrella patens	Ppat	Genome	40 sps dataset	Ensembl Plants 27		Embryophyta	Viridiplantae
Chlamydomonas reinhardtii	Crei	Genome	40 sps dataset	Ensembl Plants 27		Chlorophyta	Viridiplantae
Volvox cartieri	Vcar	Genome	Extended dataset	JGI 2014-10-01		Chlorophyta	Viridiplantae
Chlorella variabilis	Cvar	Genome	40 sps dataset	JGI 2014-08-18		Chlorophyta	Viridiplantae
Micromonas pusilla	Mpus	Genome	Extended dataset	JGI 2009-04-09		Chlorophyta	Viridiplantae
Cyanidioschyzon merolae	Cmer	Genome	Extended dataset	Ensembl Plants 27		Rhodophyta	Viridiplantae
Cyanophora paradoxa	Cpar	Genome	Extended dataset	Rutgers / Price 2012 Science 10.1126/science.1213561		Glaucophyta	Viridiplantae
Ectocarpus siliculosus	Esil	Genome	40 sps dataset	Genoscope / Cock 2010 Nature 10.1038/nature09016		Phaeophyceae	Heterokonta
Phytophthora infestans	Pinf	Genome	40 sps dataset	Ensembl Protist 27		Oomycota	Heterokonta
Toxoplasma gondii	Tgon	Genome	40 sps dataset	Ensembl Protist 27		Apicomplexa	Alveolata
Tetrahymena thermophila	Tthe	Genome	40 sps dataset	Ensembl Protist 27		Ciliophora	Alveolata
Bigelowiella natans	Bnat	Genome	40 sps dataset	Ensembl Protist 27			Rhizaria
Emiliania huxleyi	Ehux	Genome	Extended dataset	Ensembl Protist 27			Haptophyta
Guillardia theta	Gthe	Genome	Extended dataset	Ensembl Protist 27			Cryptophyta
Leishmania major	Lmaj	Genome	Extended dataset	Ensembl Protist 27		Kinetoplastida	Excavata
Naegleria gruberi	Ngru	Genome	40 sps dataset	Ensembl Protist 27		Heterolobosea	Excavata
			40 sps dataset: used for orthology analysis
			Extended dataset: used for targeted gene family analysis
