# Supplementary material for: Dynamics of genomic innovation in the unicellular ancestry of animals
Source: eLife journal article supplement (doi:10.7554/elife.26036), 2017-07-20
Supplement: supp [file elife-26036-supp-v1.zip › elife_poa_e26036_Figure_2_Source_Data_11.csv]

PF00215	Acas_Amoebozoa	LSVAADVTSKSELLTLADKLGPHICMLKTHADIVRDWDANFIKELKELADKHHFLLFEDRKFADIGYVAQQQYGGGPFGICDWADVVTVHLVAGASVVTSLKETAAQKGQERGALLIAQMSTXXXXXXXXXXXXXXXXXXXHTDFVVGFICQENVLAKNPEESASFLYCTPGVRIGSQGDGLGQTYRTPEMVI
PF00215	Ddis_Amoebozoa	TNLAVAADLTDKQQLLDLAESIGSEICVLKTHVDIIDNYDEEFIKSLKCIAAKHNFLIFEDRKFADIGNTVKYQFENGVYKISKWADMVTVHGVAGSSIVDGFKSGLKEYGSGLLLLAQMSSKGSLCVGDYTTQMIEMANNNKEEVMGLICQERLPSMTDGLVLMTPGVQFNSTGDAMGQQYNTPEYIIKEKNTDVIIVGRGIYQSNDPKSVANKY
PF00215	Ppal_Amoebozoa	TNLAVAVDLTRKQEVLNLADSIGSEICVLKTHVDIIDDYDQDFVHQLEQIASKHNFLIFEDRKFADIGNTVKYQFESGVYHISKWAHMVTIHGVAGPAIIDGFRDSIKQTGAGLLLLAQMSSKGSLCVGEYTNQMIEMGKQNSDAVMGFICQERLESMSDNFVLMTPGIQFNSKGDSMGQQYNTPDYVVKEKGTDVIIVGRGI
PF00215	Rirr_FungiZyg	TNLSLALDVTTKREFLEIADKAGPYICLLKTHVDILVDFDQDFIEQLKELRTKHEFMIFEDRKFADIGNTVKHQYSKGIYKISEWADITNAHPLPGDGIVSGLKEVGLVLGRGLLLLAEMSSKGSLATGAYTEAAVEMARRHKDFVVGFIAGRKLISDDDKEDFIVMSPGVGLDVSTDGLGQQYRTPRNVILESGSDIIIVGRGIYGSDKDVAV
PF00215	Mcir_FungiZyg	LSVAVDVTTKKELLSIADAVGPFVCVLKTHIDIVEDFDHDLVAQLEQLAKKHDFLIFEDRKFADIGNTVKHQYANGIYKIASWSHITNAHTVPGEGIIKGLGEVGLPLGRGLLLLAEMSSKGALTKGSYTSESVEMARRNKDFVFGFIAQHKMNEHDDEDFVVMSPGVGLDVKGDGLGQQYRTPHEVIVESGGDIIIVGRGI
PF00215	Rory_FungiZyg	LSVAVDVTTKKELISIADAIGPYICVLKTHIDIVEDFDADLIQQLQELAKKHDFLFFEDRKFADIGNTVKHQYANGIYKIASWSHITNAHTVPGEGIIKGLAEVGLPLGRGLLLLAEMSSKGALTKGSYTTDSVEMARRNKDFVFGFIAQNKMNQYDDEDFIVMSPGVGLDVKGDGLGQQYRTPREVIVESGADVIIVGRGIYGQPDKLVEQAQRY
PF00215	Pisp_FungiNeo	TNLSVAIDITKKADIIRIADLLGPYICVLKTHIDIVEDFDMELVETLKQLAQKHEFLIFEDRKFADIGNTVKHQYEGGVYKIASWSDITNAHPIPGEGIIKGLKEVGLPLNRALLLLAEMSSKGTLAKGQYTLDTIEMAKRNTDFVIGFIGQNRIYDNGDDSQDFLYLTPGVGLETKGDSLGQQYRTPHQVIVESGCDIIIVGRGVYGAKDDAEIKE
PF00215	Mver_FungiZyg	SNLSVAADLTSKAALIELADKVGPYICLLKTHIDVVDDFDQDLVDQLTALAKKHDFMIFEDRKFADIGNTVKLQYSSGVYKIASWSHITNAHTVPGEGIIQGLREVGLPLNRAMLLLAEMSSAGTLAKGDYTTTTVELARKYKDFVVGFIAMHRYADKEGDDFIYMTPGVGMDQKSDGLGQQWKHPREVVYDNGCDVIIVGRGI
PF00215	Spom_FungiDik	SNLSVAVDLTKKSEILELVDKIGPYVCVIKTHIDVVEDFDQDMVEKLVALGKKHRFLIFEDRKFADIGNTVKLQYASGVYKIASWAHITNCHTVPGEGIIQGLKEVGLPLGRGLLLLAEMSSKGSLATGSYTEKTLEWFEKHTDFCFGFIAGRRFPNLQSDYITMSPGIGLDVKGDGLGQQYRTPEEVIVNCGSDIIIVGRGVYGA
PF00215	Spun_FungiChy	LSIAADVTTKAELLKLADVLGPYICVFKTHIDIVTDFDQDLIKQLEALAQKHNFLIFEDRKFADIGNTVKHQYSQGVYHIASWSDITNAHPLPGEGIIKGLKEVGLPLSRGLLLLAEMSSAGSLAKGAYSEEAVRMARRNRDFVIGFIGQRRLSVPLDAGQEQEDDFLYLTPGVSMAQPGDSLGQQYRSPEQVILESECDVIIVGRGIYGAADPVAKATEY
PF00215	Crev_FungiZyg	SNLSVAADVATKAELLLLADKVGPYICVLKTHIDIVEDFDMDLVAQLQALAEKHDFLIFEDRKFADIGNTVKLQYGGGIYRIADWAHFTNCHVIPGEGIIQGLAEVGMPKGRGLLLLAEMSSKGMLATGAYTDKNVEMAVKNEFVVGFIGSRRFTEDRDLITMTPGIGLHASGDALGQQYRTPETIVTKNGSDIIIVGRGI
PF00215	Bden_FungiChy	LSIAADVSTKAELLHIADTLGPYICILKTHIDIVSDFDQDLIVQLVALSKKHSFMIFEDRKFADIGNTVKLQYSKGIYHIADWADITNAHPLPGEGVVHGLKEVGLGLADETNGVTRGLLLIAEMSSKGSLATGLYSDAAVQMACRHRDFVFGFIGQNRLGYHKESTSSCLDDFIYMTPGVGMPESGSSTIDGDELGQQYRTPQQVILDSHCDVIIVGRGIYGSKNMVERAKAF
PF00215	Ccor_FungiZyg	TNLCISVDVNKKEEFLNIIDTVGPYVCLVKTHIDIIDDFDMDLVEKLLALAKKHNFMIFEDRKFADIGNTVKHQYSSGVYKIASWADFTNCHIVPGPGIIEGLREVGLSSDLPRQRALLLLAEMSSKGSLATDSYTDKNVELAKKYDDFAVGFIASRNLSADAPQLIVMTPGVGLDSTGDGLGQQYRTPEKIIGENASDIIIVGRGIIKAKDVAAEAQRY
PF00215	Nk52_Ichthyosporea	SNLSFSVDVTKKAEILRLTDLVGPFIVLLKTHIDIVEDFDEDLVIQLNALAKKHKFMIFEDRKFADIGNTVKLQYSSGVYKISEWSDIVNCHIVPGPGIIDGLKEVGLPKKRGLLILAEMSSKGSMAVGEYTHKAVELAKANKDFVIGFISGRSLVSDDPSLIHMTPGVSMSTSGDSLGQQYNDPHRVIYDLKSDIIIVGRGIYKADNPAEEAKKY
PF00215	Cowc_Filasterea	LAVAADVTTVAELLHIADVLGPHICVLKTHVDILSDFTTADAFAAKLRPLADKHGFVVFEDRKFADIGNTVKHQYRDGVHRIVEWADIVDAHTVPGPGIVQGLKEVGLPRGRGLLLLAEMSSAGSLATGEYTRASIEMAKQHKDFVIGFIAQRAPIPDDASFITMTPGINLTVSGDATGQQYRTPAQAVETGSDVLIVGRGVYTAADPVASAIAY
PF00215	Colp12	LSIAADVSTKSELIALADLLGPYICVLKTHIDIVVDFDDDLAAQLKALSEKHDFMIFEDRKFADIGNTSMLQYSQGVYKIVDWAHITNAHVVPGPGIIKGLKEAGIKKDRGLLLLAEMSSAGSLATGSYTQAAINMAKENKDFVFGFISQNKLIADDETFIYMSPGVNLTEGKDNLGQQYRTPDMVVAAGSDIIIVGRGVYK
PF00215	Awhi_IchthyosporeaIchthyophonida	TNLCVAADVPTCDEVLALADNVGPYICVFKTHVDVIVDFSSDFTQKLAALAEKHQFLIFEDRKFADIGNTVKQQYAAGVYHIASWAHITNAHPIPGPGIIDGLKEVGLPLNRGLLLLAEMSSKGSLARGSYTEETVAMARENKDFVFGFIGSRCFTEDDPTLITMTPGVQLKTNTDALGQQYRTPALIVTQNRSDIIIVGRGIYQAANPVEAAKEY
PF00215	Pgem_IchthyosporeaIchthyophonida	TNLCIAADLSTCEEVLKLADDIGPHICVFKTHVDVIDDYTPDFNDKLSQLAEKHNFFIFEDRKFADIGNTVKHQYSGGVYRISSWAHITNAHPVPGPGIIDGLKEVGLPLERGLLLLAEMSSSGSLATGDYTKATIEMAKNNKDFVFGFVGARCFIEDDPSFITMTPGIKLVAGTDALGQQYRTPELIITENKSDIIIVGRGIYKADNRLEAAQKY
PF00215	Apar_IchthyosporeaIchthyophonida	TNLCVSADLTSASELLKLADTLGPYMCLLKTHVDIINDFSSAFVDEISALAAKHNFMIFEDRKFADIGNTVMHQYRDGVYHIASWAHITNAHIVPGPGIIDGLKEVGKPLGRGLLLLAEMSSKGSMATGAYTTKCVELANQHKDFVMGFIAQHCLTPSDPTLLVMTPGVQMAAGGDDKGQQYNTPESVVCGCGSDVIIVGRGIYGSKDPVAAAQAY
PF00215	Ihof_IchthyosporeaIchthyophonida	SNLCLSADVTTAQELLSLADTLGPYLCMLKTHVDIIVDFSPEFVQKLTDLAEKHNFLIFEDRKFADIGSTVMHQYRDGVYHIASWSHITNAHIIPGPGIIDGLKEVGLPLGRGLLLLAQMSSKGSMATGAYTQECVRLAHEHSNFVIGFIGQEQLCPDTPTLIVMTPGVQLAKGGDGLGQQYNTPDLVIREKGCDVIIVGRGIYGAADPIATTKLY
PF00215	Ihou_IchthyosporeaIchthyophonida	SNLCLSADVTTAQELLSLADTLGPYLCMLKTHVDIIVDFSPEFVQKLTDLAEKHNFLIFEDRKFADIGSTVMHQYRDGVYHIASWSHITNAHIIPGPGIIDGLKEVISIYSSKGSMATGAYTQECVRLAHEHSNFVIGFIGQEQLCPDTPTLIVMTPGVQLAKGGDGLGQQ
PF00215	Cfra_IchthyosporeaIchthyophonida	LLALAEKVGPYICVLKTHIDILVDFDDDLIVQLTDIARKHNFQLFEDRKFADIGNTVVHQYRDGVYKIASWSHFTNAHPIPGPGIVDGLRLVGKPLGRGLLLLAEMSSKGALTTPQYAAQAIEMAKGNKDFVFGFISQSCLVPDDPSLIYMTPGVQLKEGTDALGQQYNTPQRVIGEKNCDIIIVGRGIYNAGDVAATAKEY
PF00215	Sarc_IchthyosporeaIchthyophonida	LWLASYTELIFMIELLQLAEEVGPYICVLKTHIDIIVDFDDDLIVQLTEIATRYNFQLFEDRKFADIGNTVVHQYRDGIYKIASWSHFTNAHPIPGPGIVDGLRQVGKPLGRGLLLLAQMSSQGALTSPEYAAQAVQMAKANKDFVFGFISQDCLVPEDPSLIYMTPGVQLNAGTDALGQQYNTPDLVIRERKCDIIIVGRGVYKAPDCAAAAKEY
PF00215	Amac_FungiBla	LCVSADLTKAADVLQLADQVGPYICMLKTHADIIEDFDAKFVEALQKLAEKHRFMIFEDRKFADIGNTVQHQYAHGVHKIADWSHIVNAHTLPGEGIISGLKAVGLPKQRALLLLAQMSSAGTLFTEAYTQQTVVLADKHPDFVIGFIAQRALPSPAGNDYLVLTPGVGLDDKGDGLGQQYRTPHDVLVKDGCDVIIVGRGI
PF00215	Cang_FungiBla	TNLCVSADLTKSSEILALADAVGPFICMLKTHVDIIEDFSDSFVSGLQSLAKKHNFVIFEDRKFADIGNTVQLQYSSGVHRIASWSHFTNAHPLPGEGIVTGLKAVGKPLGRALLLLAQMSSAGSLFTAEYTSQAVAMAEKHRDFVVGFIAQKRLSSPHDFLVLTPGVNLAEAGDDMGQQYRTPKTVMADGCDVIIVGRGI
PF00215	Adig_Metazoa	SNLAVSVDFTTSKEVLSLVKIVGPHVCIVKTHVDILEDFTPEFNQSLQNLAEKYNFIVFEDRKFADIGNTVKKQYSKGLYHIANWADIVNAHAVPGDGVVKGLKEIGAPLGRACLLIAEMSSAGNLASGEYTAQVVEMAKKHNDFVIGFISQSSLLDDPGFVHLTPGVQLRKGADALGQQYLTPADVIVNKGSDIIIVGRGIYQAEDPRKAA
PF00215	Nvec_Metazoa	LAVSVDLTKSGNILNLVNQVGPHVCIVKTHVDIIEDFTPGFVASLQNLATKHNFLIFEDRKFADIGNTVKHQYSKGIYHISDWAHITNAHPVPGEGVITGLKEIGAPKGNGCLIIAEMSAKGNFANGEYTKAAIEMAKNHQDFVFGFISIGSIVDDPGFVHMTPGVKLIKGGDALGQQYLTPEEVVGKKGSDVIIVGRGIYEAENPASAAIEY
PF00215	Skow_Metazoa	LAFSVDVTKCQQVLELVDKVGPHVCIVKTHVDIIEDFNDDFITALQKLADKHNFLIFEDRKFADIGNTVKHQYSSGVYKINQWAHITNAHSVPGDGVVQGLKDVGLPKNRGCLLIAEMSSTGNLATGEYTKATVKMAEEQADFVIGFICTSRLTDDPRFLHMTPGVQLSAGGDSLGQQYLTPNIVIGDRGSDIIIVGRGIYKADDPSNAAKLF
PF00215	Lgig_Metazoa	LVVSADFTQSQQILELVDKVGPHVCMVKTHIDIVEDFSQDFITKLLQMAQKHKFLLFEDRKYADIGNTVKLQYNNGIYHVSSWADIINAHCISGLGVLAALKQIGLEKNKGCLLVAEMSSTGNMITAEYTAATVKLAEENKDFVIGFICQNRLSDDPTLLHLTPGVQLKKGSDDLGQQYLTPEEVISKRGNDVIIVGRGITQSADVINTAIAY
PF00215	Bflo_Metazoa	LAVSADLRTAAGILKLADEVGPHICMLKTHVDIITDFSAEFVQSLTELAEQHQFLIFEDRKFADIGSTVQHQYQDGLYQISGWAHLINAHALPGPGVLEGLKQVRGHTALACLLIAEMSSRGNLATGEYTKATVKMAEEHRDFVVGFISQSQLSQDPAFIHMTPG
PF00215	Ctel_Metazoa	LALSADVNTAAELIQMADSIGPYICVLKTHIDIIEDFSADLIQKLSSLAAKHNFIIFEDRKFADIGNTVKQQYGGGMYRISEWADIINAHAVPGPGIIQGLKEVGATKNRACLMLAQMSSKGTLAKDTYTAESVKMAEGNKDFVIGFICTEKLSSDPAMLHMTPGVQLSAGVDGLGQQYLTPQEVITNRESDVIIVGRGITQSANPMQAAKEY
PF00215	Xtro_Metazoa	TNLCLSADVTDAFELLQLAADLGPSICMLKTHIDILRDFTPKVASELRVLAEQHQFLLFEDRKFADIGTTVKHQYEGGIYRISSWADVVNAHVVPGPGVVQGLREVGGPINRGCLLIAEMSSEGSLATGDYTKAAVQMAEQHRDFVIGFVSGRRVGRDPALVHLTPGVQVQAGGDELGQRYQTPYEVIVNKGSDVIIVGRGILSAANRLEVAEMY
PF00215	Nspp_Discicristoidea	TNLSIAVDVRTAAELLKIADVCGPHICVLKTHIDILDDFKPSVVDKLRKLAEHHKFMIFEDRKFADIGNTSKQQYEGGVYRIVTWADVVNAHTVSGPGIIAGLSEAGLRQGRGLLLLAEMSSAGSLAVGEYTEKTIEMARANRDFVIGFVSARKLATGEGSDESFIYMTPGVNLDVAGDALGQQYNTPDIVIRERGSDVIIVGRGIYQAADPAAEAERY
PF00215	Sdes_IchthyosporeaDermocystida	TNLSFSADVSTQAELLAIVDLVGPFICLLKTHIDILRDFDKELPSKLSVLAQKHNFLIFEDRKFADIGNTVQQQYGSGIYEIASWADIVNCHLVPGPGIVAGLADVGLPLGRGLLLLAEMSSEGNLATGKYSEQAIEWALKDDSNFVIGFISSGQLIAHDPRFLYMTPGVHIHQSGDKFGQVYKSPEFVICEKKSDIIIVGRGIYSDSNPAQAASEY
PF00215	Clim_Corallochytrea	TNICLSADVHDMDEILELAKLLGPHICMLKTHIDIVPNFTLDKAMELYRMSEEMGFVIFEDRKFADIGNTVSMQYSSGIYKIAEWSHITNAHTVPGPGIIRGLAKVGLEKGRGLLLLAEMSSVGNLAVGEYTEKTISMAKENKDFVIGFVSQRKLIPEDDHFIVTTPGVSLVSKGDALGQQYRSPSDAINDGSDIIIVGRGILAQKDRIEAAKQY
PF00215	Clii_Corallochytrea	TNICLSADVHDMDEILELAKLLGPHICMLKTHIDIVPNFTLDKAMELYRMSEEMGFVIFEDRKFADIGNTVSMQYSSGIYKIAEWSHITNAHTVPGPGIIRGLAKVGLEKGRGLLLLAEMSSVGNLAVGEYTEKTISMAKENKDFVIGFVSQRKLIPEDDHFIVTTPGVSLVSKGDALGQQYRSPSDAINDGSDIIIVGRGILAQKDRIEAAKQY
PF00215	Cneo_FungiDik	TNLCVSVDVTKAAEVLEVVRRVGASVCMVKTHCDIIEDFTLEFADELVKLSKQLDFVIFEDRKFADIGNTVSLQYSSGTHKIASWSDLTNAHSVPGPGIITGLSSIGLPLGRALLLLANMSSKGALATGEYTKQTMRMAREAGRDFVVGFIAQERVDEGEEGDWLIMSPGVGLAAKGDKLGQQYRTPKEVVLEAGADVIIVGRGIYGVQGGEEAVK
PF00215	Umay_FungiDik	TNLCVSIDVTNKQDLLDVCEAVGRNVCLVKTHIDIVEDFDMDLVHQLTQLSEKHDFLIFEDRKFADIGNTVSLQYSAGVHKIASWSHITNAHLVPGPSVISGLAKVGQPLGRGLLLLAEMSSEGALTKGDYTQACVDEAHKDTTGFVCGFIAMSRVDERERANTHRDLLILTPGVGLDVKGDGLGQQYRTPDQVIRESGCDVIIVGRGIYGA
PF00215	Ocar_Metazoa	TNLVFSADIACPENFLKVVDSVGPYVCVVKTHVDTIENVTTEFLTSLTRLARKHDFLLFEDRKFCDIGNTVRSQYGSGTFKISEWADVINAHALPGAGVIEGLRKVGQPKGRGCLLIAEMSSKGNLISSSYTQESVALAKCYSDFVVGFIATQKLTDDPNFLHFTPG
PF00215	Hmag_Metazoa	LALSADITNCSELLRIADLLGPHICILKIHVDIMVDFSSQFIQLLQELAKKHDFVIFEDRKFADIGNTVKEQYSRGIYKIRDWADLINAHGVPGDGVLLGLKEEASGYDRGCLLVAQMTSLGALTNCGYSDAVVQMAERSSEFVLGFISTSKLIDGENFLYMTPGVNMAVSGD
PF00215	Dcos_ChoanoflagellataStephanoecidae	TNLCVAADVTSSDDLIKLADAVGPYICCLKTHCDIVHDWNDDLVQKLKALATRHRFLLFEDRKFADIGNTVIHQGRDGLHKISSWANFVTVHSLPGNGIIDGLRQAFVGNKMGGIVLLAEMSSKGNLITSQYTDATIKLAKENEDFVLGYITQRDISQGSPFICMTPGVKLQQGGDSMGQQYNTPRAVLQKGCDIIIVGRGIYQAQDPTSAAKEY
PF00215	Hnan_ChoanoflagellataAcanthoecidae	TNLCVAADVTTSAELLTLAAAVGKNICCLKTHCDIVSDWTAETAVALQKLAQEHNFCIFEDRKFADIGNTVVHQCRDGYHQIAGWADFVNAHPLPGPGIVDGLRTAFEKTPKAGLLLLGQMSTKGNLISEAYTEATVSMAEANPDFVFGFISQKRLRSSAGPDPFVYMTPGVKMEQGGDALGQQYRTPHSVIVGDGCDVIIVGRGI
PF00215	Sros_ChoanoflagellataCraspedida	TNLCVAADVVEAKALLDLADAVGPQICVLKTHCDIVRDWTDETGTQLRFLADKHDFLIFEDRKFADIGNTVVQQCSGGVHRIASWAHFTNAHALPGDGIVDGLRTAAGVENHGLLLLAQMSSAGNLLNKEYTSACVEMAKRHTDFVFGFISQERVIEGSEGDAFVYMTPGVKLSQEGDGLGQQYNTPTAVIADRNSDIIIVGRGIYKSDNPAATAAIY
PF00215	Mbre_ChoanoflagellataCraspedida	LCVAVDVTSAADLLEIAAEVGRYTCCIKTHCDIVSDWTEATATALRKLAEELDFMIFEDRKFADIGNTVKLQCSAGRYKIAQWADFVNCHALPGPGVVDGLKAAAEEVKRDVGIVVLAQMSSAGSLATGEYTTKSVELARQYPQEVFGFIGQERLGDEAHLVMTPGVKLAAGGDALGQQYNTPQSVLVEKNCDVIIVGRGITSATSRAEAAAEY
PF00215	Mlei_Metazoa	SNLCFSADVTESQKLLELVDKVGPHICLLKTHIDIVSDFTPDLVTELRKLAKKYDFLIFEDRKFADLGNTVQKQFSEGIYKISSWADFINAHVVVGPGIITGLKNVAHNQGLILIAQMSAAGNLCHQAYIKEALRMAEDNRSFVCGFICTESVTSDESFLNFVPGVNFSSSGDGLGQQFVSPSQAVQKGADVIIVGRGIYQSSNPAETAKEY
PF00215	Mvib_Filasterea	SNLCVAVDTTESAKLLELANQFGPHICVLKTHIDILSDFSPEVVTSLRELAEKHNFVIFEDRKFADIGNTVKLQYSKGTYGISKWAELVTAHGIAGEGVIAGLREGAHEEQDQNMSRGALLLVEMSSAGSLATGVYSTNALKMAEQNKDFVCGIITQTVSSTEIGLIHFTPGVNITSNVDSLGQQYNDPQTLSDRGTDVFIVGRGICNAADPLAQCVLY
PF00215	Tadh_Metazoa	LIFSADVDSLDTLLDLASIVGPHICAIKTHIIEDFTPGFIYKLRNVADEQNFLILEDSKFADIGNTVYKQYVDGYHICEWADFVTAHAVSGPGVIEALVKGSGNRDRACLLIAQMSSDGNLVSEAYTNGVLKIAEDHSGFVAGFICRQKLSSKPNFIHITPGVKLAAGMGTLGQQYLTPDEVIKNRQSDVVIVGSGIYQAEDPLAATIAY
PF00215	Falb_Discicristoidea	TNLCISLDMTDSAEILSTARLVAPYVCLFKTHVDIVADFSQDFVAELTAIAEEHDVLIFEDRKFADIGNTARLQYEAGMYRIAEWSHFTNAHVVSGPGVVDGLRGAAERLGRGLLLLAEMSXSGSLVTGPVTELAVELAAREPALITGLIAGGALLPDTADVITMSPGVSLAGEDSPTARPAAGDSFGQQYVTPRRAIMDRGTDVVIVGRAIIGAADPVAAAKLH
PF00215	Aque_Metazoa	LALSADLTTTDKLIKLVDEVGPHVCLVKTHVDIMSDFSYDGTGLRLKELAKKHNFMIFEDRKFSDIGNTCKLQYTSPLYSLSDWSDLVTCHGIAGPGTVNALSDVPEGSGCVLVAEMSSRACLTSSEYKESVLRIARDFDNVIGLICQRKLSEREDILYMTPGVNIDKEGDRLGQQYHSPEEVIIRKESDIIIVGRGIYESADPVASAIQY
PF00215	Dpul_Metazoa	LCVAADLTSLDEVIKLAESIGPKIVVLKIHVDILEDFSLAKMKQLRKVAKAHEFLIMEDRKFADIANTVQQQFHGGVYKISEWADLITAHPLAGPEMITHLFGDSSSDSRRTCGCVLILEMSTKNALTSQDYSKEAAKWGLIASDIVAGFVGQSPPDADFSGWIQFTPGVNSASKSGDSKGQQYCSPAEAVLERGADIIIVGRGLIKSSDVVATAENY
PF00303	Acas_Amoebozoa	PHEEEQYLRLVHAIIKHGNDRDDRTGVGTLSRFGCQMRFSLRDGTFPLLTTKRVWWKGVAEELLWFVSGCTNANTLATKKVNIWKENGSKDFLAKCGLGHREEGDLGPVYGFQWRHWGAKYVDMHTDYSGQGHDQLAECIALIKHNPTSRRIVMSAWNPTDLKEMVLPPCHMFCQFYVANGELSCQMYQRSADMGLGVPFNIASYAALLCLIARITDKNPGSLIFTMGDAHIYKNHVDGMKEQISRTPYDPPRLVIGRKPTLDDLHTEDFVLTGYYPQPTIKFRMAI
PF00303	Pbif_Breviatea	PVKMEHPEKQYLDLIQKIIETGNDKGDRTGVGTLSVFGTNMRFDLKKGFPLLTTKRVFWRGVVEELLWMLRGCTNVNLLAEKGIHIWDANATREFLDNRGLKEREVGDIGPCYGFQWRYFGAKYIDMHTNYKGQGVDQLANVVRTLKTNPNDRRIIMSAWNPSDLDAMALPPCHMFCQFYVHANTLSCMMYQRSADMGLGVPFNIASYSLLTHILANLCDMEVGEFVYNLGDTHVYKNHITALREQVTRTPRPFPSLALRQKLSTVDDMDSLTYDDFALTGYNPHPKLKMEMAV
PF00303	Ttra_Apusozoa	RGPNRGELGYLDLIRRVLADGFERDDRTGVGTFSLFGEKLEFDLGDGFPLLTTKRVFWRGVAEELLWFVSGSTNANELAAKGIRIWDGNSSREYLDSIGLTEREVGDLGPVYGFQWRHFGAAYTDMHADYSEEGVDQLARIIETITTKPHDRRMVMSAWNPAALAEMALPPCHMFCQFYVADGKLSCQMYQRSCDIGLGVPFNIASYALLTHMVAHVTGLGVGKLTLVMGDAHVYKNHVEPLQRQLERFPRAFPSLRINREVASIDDFDFTDFEVVGYKPMKGIKMQMAV
PF00303	Nspp_Discicristoidea	EERQYLALVRDIIDTGDRRGDRTGTGTLSKFGCQMRFSLRDGRLPLLTTKRVFLRGVLEELLWFISGDTNAKTLQARDVHIWDGNASREYLDSIGLPHRAAGDLGPVYGFQWRHFGAKYVDMHTDYTGQGVDQLAELIHKIKTNSTDRRLILSAWNPADLKLMALPPCHQFYVSKGELSCQMYQRSCDMGLGVPFNIASYSLLTHMLAHVCGLKAGDLIHVMGDTHVYINHVEALEEQLKREPRPFPTLRINPAVTDIDAFRASDFEVVGYEPHGKIAMQ
PF00303	Adig_Metazoa	DEMQYLGLIQYILDYGAKKEDRTGTGTISVFGTQMRFSLRNNVFPLLTTKRVFWRGVAEELLWFVSGCTNAKELSNKGIRIWDANGSREFLDKQGLHEREVGDLGPVYGFQWRHFGAKYVDMHTNYDSQGVDQLANVIDKIKNNPDDRRIIMTAWNPVDLPIMALPPCHSFVQFYVCNGELSCQLYQRSGDVGLGVPFNIASYSLLTYMIAHVCGLKPGDFVHTLGDAHVYLNHIDALKKQLEREPRPFPTLKIVGDVQDIDSFKFENFELTGYNPHPTIKMKMAV
PF00303	Nvec_Metazoa	HDELQYLDMIRYIMENGTVKTDRTGTGTKSVFGAQMRFSLRDGVFPLLTTKRVFWRGVAEELLWFVKGCTNAKVLADKNIHIWDANGSRGFLDRQGLSHREEGDLGPVYGFQWRHFGAKYVDMHTDYTGQGVDQLAQVIDKIKNNPDDRRIIMLAWNPSDIPLMALPPCHAFVQFYVANGELSCQLYQRSGDMGLGVPFNIASYSLLTYMIAHVCGLKPGDFVHSLGDAHVYLNHFEALEEQLKREPRAFPSLVIKRQVDDIDQFTFDDFEIVGYKPHPKIKMEMAV
PF00303	Bflo_Metazoa	RPARKHDEYQYLDLVRHILDCGQRKDDRTGTGTLSVFGAQCRYSLRGQFPLLTTKRVFWRGVAEELLWFVRGCTNGKELSDKKVHIWDANGSRDFLDKRGLSHYEEGDLGPVYGFQWRHFGAEYKDRYTDYTGQGVDQLAQVIHTIKTDPDNRRIIMSAWNPPDLPKMALPPCHAFVQFYVCNGELSCQLYQRSGDTGLGVPFNIASYSLLTYMIAHITGLKPGDFVHTLGDAHVYVNHVDALKEQLKREPRPFPTLNIKRQVENIDDFKMEDFEIVGYKPHPKISMEMAV
PF00303	Mlei_Metazoa	DEMQYLNLIRTIIQKGNKKGDRTGTGTISQFGAQMRFSLRDQFPLLTTKRVFWRGVAEELLWFISGCTDGKVLSDKRVHIWDANGSKEFLKKRGLGHRQEGDLGPVYGFQWRHFGAKYVDKDTDYTGQGVDQLAEVIHKIRTNPTDRRIIMSAWNPADLEEMALPPCHCLVQFYVADGHLSCQLYQRSADMGLGVPFNIASYALLTYMIAHVTDLHPGDFIHTLGDAHVYNNHVTPLQEQLARAPRPFPTLNIKRKVESIDDFRMEDFELVGYNPHPKISMEMSV
PF00303	Skow_Metazoa	HDEYQYLQLVENIIHNGNSKSDRTGTGTLSIFGAQCRYSLRDQFPLLTTKKLFWRGVAEELLWFIKGSTNAKELSDKNVHIWDANGSREFLDSIGLQEREEGDLGPVYGFQWRHFGAQYKDMHSDYSNQGIDQLANVIETIKTNPHDRRIIMTAWNPTDLPKMALPPCHAFVQFYVCNDELSCQIYQRSADMGLGVPFNIASYALLTYMICHVTGYKPGDFVHTMGDAHVYSIHIEPLKQQIQRTPRPFPKLHIKRKIENIDDFRYEDFELEGYSPHPKIQMDMAV
PF00303	Dcos_ChoanoflagellataStephanoecidae	EYQYINLIEEIFDSGKKKSDRTGTGTISRFGAQMRFSLRDEFPLLTTKRVFWRGVAEELLWFIKGDTNAKNLSAKGVKIWDANGTKEFLEKQGLGHREEGDLGPVYGFQWRHFGAEYKDMHTDYTGQGHDQLADVINTIKTNPDSRRIIMSAWNPCDIKKMALPPCHTMCQFFVCDGELSCQLYQRSADMGLGVPFNIASYALLTVLIAHVCDLTPGDFVHTIGDAHVYLNHIDPLKEQLKREPKPLPKLNIKRKVTNIDDFNFEDLELIGYSPHPKIAMDMAV
PF00303	Mbre_ChoanoflagellataCraspedida	GNRSIFGAQMRFNLRESFPLLTTKRTFWRGVAEELLWFIQNTNANDLAARDVHIWDANGSKDFLEKQGLGHREEGDLGPVYGFQWRHFGAEYKDMHTDYSGQGVDQLAEVIEQIKTNPDSRRIIMSAWNPLDIPKMALPPCHTMCQFYVCDGELSCQLYQRSADMGLGVPFNIASYALLTYMIAQVTGLKPGDFVHTIGDAHVYLNHVDALEEQLKREPRPFPTLSFKRDIEEIDDFKFEDFDLQGYKPHNRIAMDMAM
PF00303	Hnan_ChoanoflagellataAcanthoecidae	HHSEHEYLNLIKNILTNGKFKGDRTGTGTLSIFGAQMRFSLRESFPLLTTKRVFWRGVAEELLWFVAGCTNANVLSEKKVGIWDANGSKEFLEKSGLGHREQGDLGPVYGFQWRHFGAKYTDMHADYTGQGVDQLANVIETIKTNPDSRRIILSAWNPVDIPEMALPPCHTMCQFFVIDGELSCQLYQRSGDVGLGVPFNIASYALLTVMVAHVCGLRPGDFVHTLGDAHVYSNHVEPLKVQLERSPRPYPTLNITREVKSIDDFKMEDFELLGYKPHPKIPMEMAV
PF00303	Sros_ChoanoflagellataCraspedida	QNHDEHEYLRLVQRILDTGKTRSDRTGTGTISLFGAQMRFSLREGFPLLTTKRVFWRGVLEELLWFIAGDTNANHLAEKKVHIWDANGSKEFLEQRGLGHREEGDLGPVYGFQWRHFGAQYTDMHADYQGKGVDQQIKTNPDSRRIIMSAWNPVDLPHMALPPCHVLAQFYVQDGELSCQLYQRSADMGLGVPFNIASYSLLTVMIAHVCGLRPGDFVHTIGDAHVYSNHVDALKEQLTREPRPFPTLNIKRDVTSIDDFKAEDFELVGYKPHGKIAMKMAV
PF00303	Ctel_Metazoa	HDEFQYLEAIEEIIQRGTKKGNRTGIDTISIFGMQSRYSLRNGVLPLLTTKRVFWRGVAEELLWFIKGSTNAKSLSEKGVHIWDGNGSREYLDKMGFTEREEGDLGPVYGFQWRHFGAEYKDMHADYTGQGIDQLADVIDKIKNNPEDRRIILCAWNPKDLPQMALPPCHAFVQFYVANGELSCQLYQRSADMGLGVPFNIASYALLTCMIAHVTDLQPGDFVHTIGDAHIYCNHMEALEEQLKREPREFPELKFKRKVTSIEDFTFEDFEVIGYKPHPKIQMEMAV
PF00303	Lgig_Metazoa	HDEEEYLDAIRKILKKGVKRGNRTGVDTRSIFGMQMRYDLRESFPLLTTKRVFWRGVAEELLWFIKGCTNGKDLSDKNVRIWDANGSREFLDNLGLTHREEGDLGPVYGFQWRHFGAEYKDMHTDYSGQGVDQLQDVINKIKNNPEDRRIIMSAWNPLDLNKMALPPCHCLVQFYVANGELSCQLYQRSADMGLGVPFNIASYSLLTYMIAHVTHLKPGDFVHTIGDAHVYVNHTEPLQEQLQRKPRPFPTLTLKDGVKDINDFKMEDFELTGYNPYPKIKMDMAV
PF00303	Ocar_Metazoa	EEYQYLELIEQIIDRGSEKGDRTGTGTKSMFGAQMRFNLRDSFPLLTTKRVYWKGVAEELLWFIRGSTNAKELSAKNVKIWDANGSRDFLDGLGLTEREEGDLGPVYGFQWRHFGASYESMRSDYRGKGVDQLASVIHKIKTNPNDRRIIMCAWNPADLPLMALPPCHTLCQFYVCDGTLSCQMYQRSADMGLGVPFNIASYSLLTCMIAHVCDLEPGDFVHTLGDAHVYLNHIEPLRTQLQRTPRPFPKLVFHRKV
PF00303	Clim_Corallochytrea	NLEERQYLELVEKIINEGSRKGDRTGTGTLSIFGAQMRFSLRDDIFPLLTTKRVFWRGVAEELLWFVSGDTNAKTLSDKNVKIWDANGSREFLDNRGLTDREEGDLGPVYGFQWRHFGAEYTTMHDDYTGKGVDQLAEVIQTLQENPNCRRMIISAWNPADLPKMALPPCHMMCQFYVADGELSCQLYQRSCDMGLGVPFNIASYALLTRMVAQVCDLKPGDFVHTLGDAHVYINHVEALKEQLKREPRPFPKLRINPSVTDIDGFRMEHFELIDYNPMGRIKMDMAV
PF00303	Clii_Corallochytrea	NLEERQYLELVEKIINEGSRKGDRTGTGTLSIFGAQMRFSLRDDIFPLLTTKRVFWRGVAEELLWFVSGDTNAKTLSDKNVKIWDANGSREFLDNRGLTDREEGDLGPVYGFQWRHFGAEYTTMHDDYTGKGVDQLAEVIQTLQENPNCRRMIISAWNPADLPKMALPPCHMMCQFYVADGELSCQLYQRSCDMGLGVPFNIASYALLTRMVAQVCGLKPGDFVHTLGDAHVYINHVEALKEQLKREPRPFPKLRINPSVTDIDGFRMDHFELIDYNPMGRIKMDMAV
PF00303	Awhi_IchthyosporeaIchthyophonida	NHEEMQYLELVGKILTEGKLRMDRTGTGTYSLFGAQMRFSLRDNVFPLLTTKRVFWRGVAEELLWFVSGDTSAKTLKDKNIGIWDGNGSKEFLESRGLGHREEGDLGPVYGFQWRHFGAKYVDMHTDYTGQGHDQLAEVINTIKTNPTDRRMIISAWNPSALSDMALPPCHLLAQFYVCDGELSCQMYQRSCDMGLGVPFNIASYSLLTCMIAHVCGLKPGEFIHVLGDAHVYANHVDPLKEQLQRTPNKFPTLKINRKVDNIDDFKYSDFEISDYKPQKTIKMDMAV
PF00303	Pgem_IchthyosporeaIchthyophonida	NREELQYLNLCEKLITEGNLKGDRTGTGTYSLFGAQMRFSLRDGVFPLLTTKRVFWRGVAEELLWFVSGSTNAKELNAKNIKIWDGNGSKEFLESRGLGHREEGDLGPVYGFQWRHFGAKYVDMHSDYTGKGVDQLKQVIETIKTNPDDRRMIISAWNPSALSEMALPPCHLLAQFYVNNGELSCQMYQRSCDMGLGVPFNIASYSLLTCMIAHVTGLKPGEFIHVLGDAHVYSNHVEPLREQLKRTPKQFPTLNIKRDVSCIDDFKYEDFEIVDYQPQGPIKMKMAV
PF00303	Cfra_IchthyosporeaIchthyophonida	TGNAEEMQYLDLVRNIIAKGALRGDRTGTGTLSVFGTQMRYSLREGAFPLLTTKRVFWRGVAEELLWFVSGDTNAKTLQDKNIHIWDGNGSREFLDSRGLGHREVGDLGPVYGFQWRHFGAKYVDMHTDYTGQGKDQLAEVIDKIKNHPNDRRIIISAWNPTDLDDMALPPCHLLCQFFVANGELSLQMYQRSADMGLGVPFNIASYALLLCMVAHVTKLKPGDFIHTIGDAHVYCNHVDALKEQVTRVPTKFPKFKFAREIESIDDFKYEDFVLTDYNPQKSIKMEMAV
PF00303	Sarc_IchthyosporeaIchthyophonida	EEMQYLDMVRNIIANGALRGDRTGTGTLSVFGAQMRYSCRDGAFPLLTTKRVFWRGVAEELLWFVSGDTNAKTLQDKNIHIWDGNASRDFLDKRGLAHREVGDLGPVYGFQWRHFGAGYVDMHTDYTGKGKDQLADVIHKIKHTPNDRRIIISAWNPVDLDDMALPPCHLMCQFFVANQRSADMGLGVPFNIASYALLLAMVAHVTGLKAGDFVHTIGDAHVYCNHVDALKEQLGRTPTVFPKLRIKRTVTDIDDFRFDDFELVDYKPQKTIKMQMAV
PF00303	Apar_IchthyosporeaIchthyophonida	AARHEEHQYLDLVQHIIDNGNYKGDRTGTGTLSVFGGQMRFSLRDGVFPLLTTKRVFWRGVAEELLWFVSGDTNANTLKEKGIGIWDGNGSRQFLDSLGLTEREEGDLGPVYGFQWRHFGAEYKTMHDDYKGKGKDQLAEVIETIKKNPDDRRMIMTAWNPLALPYMALPPCHLLCQFYVANGELSCQMYQRSADMGLGVPFNIASYSLLTYMIAHVTGLKPGEFVHVLGDAHVYSNHVDALREQLQREPRPFPTLRIKRQVESIDDFKFDDFEVIGYEPHKPIKMQMAV
PF00303	Ihof_IchthyosporeaIchthyophonida	EEYQYLDLVRHILEKGAVKGDRTGTGTISVFGAQMRFSLRNNRLPLLTTKRVFWRGVAEELLWFISGDTNANSLKEKDIHIWDGNGSKQFLDNLGLHDREEGDLGPVYGFQWRHFGAEYKDMHYDYKGQGKDQLAEVIETIKKNPDDRRMIMTAWNPLALPYMALPPCHLLCQFYVANGELSCQMYQRSADMGLGVPFNIASYSLLTIMIAHICGLKPGEFIHVLGDAHVYSNHVDALKEQLLREPKEFPTLNIKRQVTSIDDFHYDDFEVIGYSPH
PF00303	Ihou_IchthyosporeaIchthyophonida	ELLWFISGDTNANSLKEKDIHIWDGNGSKQFLDNLGLHDREEGDLGPVYGFQWRHFGAEYKDMHYDYKGQGKDQLPTALPYMALPPCHLLCQFYVANGELSCQMYQLKPGEFIHVLGDAHVYSNHVDALKEQLLREPKEFPTLNIKRQV
PF00303	Sdes_IchthyosporeaDermocystida	EELQYLRLVKDVIERGASRSDRTGTGTLSIFGAQMRFNLRDVFPLLTTKRVFWRGVAEELVWFISGNTNAQTLKERNIHIWDGNGSREYLDKIGLTDREEGDLGPVYGFQWRHFGAKYVDMHKDYSGEGIDQLKDVIERIKTNPSDRRLIVTAWNPSDLSQMALPPCHMTFQFYVANGELSCQLYQRSCDLGLGVPFNIASYALLTRMVAHVTGLKPGDFVHTLGDAHVYTNHVDPLKIQLERSPKPFPTLTFRRTVDDIDDFRFDDFILEGYQPYPKIDMQMSV
PF00303	Nk52_Ichthyosporea	DHEEYQYLRLIRDIIEKGVQRGDRTGTGTLSIFGAQMRFNLRNDVFPLLTTKRVFWRGVAEELLWFVSGNTSANFLKEKNIRIWDGNGSREYLDSIGLTHREEGDLGPVYGFQWRHFGAEYIDMHADYAGKGVDQLANVIETLKKNPYDRRLIVTAWNPSDLKRMALPPCHMTMQFYVANGELSCQLYQRSCDLGLGVPFNIASYALLTRMVAQVTGLKPGDFIHTMGDAHVYLNHVEPLKKQLTRTPRPFPSFRFKREVTDIDDFKYEDFEVMDYKPHPKIEMEMSV
PF00303	Colp12	HEEHQYLKLIRHILDNGVKKTDRTGTGTVSVFGAQMRFSLRDEKFPLLTTKRVFWRGVAEELLWFVSGNTDANYLKNKDIHIWDGNGSKEFLEKRGLGHRDEGDLGPVYGFQWRHFGAKYVDFKTDYTGQGVDQLAEVINTLKTNPHDRRMIISAWNPSDLNQMALPPCHMMAQFYVANGELSCQLYQRSADMGLGVPFNIASYALLTRMIAQVCDLKAGEFVHTLGDAHIYLNHVEALEEQLKREPREFPTLKINADVKDIDSFKFEDFQIIGYNPHKKIAMEMSV
PF00303	Xtro_Metazoa	GKAENRDELQYLDQIKHILEHGHRKEDRTGTGTVSVFGMQARYSLRDQFPLLTTKRVFWKGVLEELLWFIKGCTNSKELSAKGVKIWDANGSREFLDKQGFSNREEGDLGPVYGFQWRHFGAEYKDTYTDYSGQGVDQLRNVIETIKNNPDDRRIIMCSWNPKDISLMALPPCHTLCQFYVIDKELSCQLYQRSGDMGLGVPFNIASYALLTYMIAHVTGLKPGDFVHTLGDAHVYLNHTEPLKLQLQRTPRPFPKLKILRKVENIDDFTADDFLIEGYNPHPSIKMEMAV
PF00303	Hmag_Metazoa	HDEYQYLNLVKRIIETGYSKADRTGTGTLSIFGGQMRFNLRESFPLLTTKRVFWKGVVEELLWFISGSTDGNILAQKGVQIWNSNGTREFLDKCNLHHREVGDLGPIYGFQWRHFGAKYVDKHADYTGQGIDQLAQIIHTIKTNPDDRRMIMSAWNPVDIPLMALPPCHSFCQFYVANGELSCQMYQRSCDMGLGIPFNIASYSLLTYIIAHVCNLKPGDFIHTLGDAHVYNNHVSALKEQIGRSPRPFPKLNIKRKVENIDDFKSDDFELIGYNPHQKIKMAMAV
PF00303	Tadh_Metazoa	HEEYQYLRLIQRIMNEGNFKGDRTGTGTKSIFGAQMRFSLRDNQMPLLTTKRTFWRGIAEELLWFVKGSTNANQLNEKGIKFWNANGSREFLDSRGLHEREVGDLGPIYGFQWRHFGAKYTNMHADYTGQGVDQLAEVIHKIKTSPNDRRIILSAWNPPDLPEMALPPCHAFVQFYVCDGRLSCQLYQRSGDMGLGVPFNIASYSLLTHMIAHICDLEAEDFVHTIGDAHVYLNHFDALQEQLMREPKKFPKLNFKRKISDIDDFKYEDFELQDYQFHPTIKMDMAV
PF00303	Mvib_Filasterea	ADDPTSQECQYLDLVSKIMETGVRRGDRTGTGTLSVFGAQMRFDLRDGRFPLLTTKRVFSRGITEELLWFISGSTNAKELQDKNVHIWDGNASRAYLDSIGLTDREEYDLGPVYGFQWRHFGAKYTNMHADYTGQGVDQLAQVIDQIKNNPTSRRIIMSAWNPADLGDMALPPCHMMCQFYVANGELSCQLYQRSADMGLGVPFNIASYALLTCMIAHVTGLKPGDFVHTIGDAHVYLNHVDALKTQLTRTPRVFPTLHIARTVESIDGFTLADFEIRNYTPHPKIEMAMSV
PF00303	Cowc_Filasterea	PPQRHEEMQYLDLIRAIIENGDERLDRTGTGTRSIFGAQMRFSLRDGVMPLLTTKRVFWRGVAEELLWFVAGNTNATALSDKDIHIWDANGSRAFLDGRGLQHREEGDLGPVYGFQWRHFGAPYTTMHADYEGKGVDQLKHVIETIKTNPNDRRLIISAWNPVDIPNMALPPCHMMCQFHVSSKKELSCLMYQRSADMGLGVPFNIASYALLTIMVAEVTGLTPGELVHTIGDAHVYLNHIDPLKEQLKREPRPFPTFKLNRKVTEIDDFRFEDFVITGYNPHAKIEMDMAV
PF00303	Cneo_FungiDik	QSNPNHEEYQYLDLIRRIINTGEVRPDRTGTGTVALFAPPSFRFSLADNTLPLLTTKRVFLRGVIAELLWFVSGCTDAKVLSSQGVGIWDGNGSKEFLEKVGLGHRREGDLGPVYGFQWRHFGAEYTDADGDYKDKGVDQLQRVIDTIKNNPTDRRIILSAWNPKDLPLMALPPCHMFCQFFVSLPPADSLGSKPKLSCLMYQRSCDLGLGVPFNIASYALLTHMIALITDTEPHEFILQMGDAHVYRDHVEPLKTQLEREPRDFPKLKWARSKEEIGDIDGFKVEDFVVEGYKPWGKIDMKMSA
PF00303	Umay_FungiDik	HEESQYLELVQRVISTGESRPDRTGTGTLALFAPQPSLRFDLTNGTLPLLTTKRVFFRGVLEELLWFVGGKTDAKLLTEKSVHIWDGNGSRAFLDSRGLSHRREGDLGPVYGFQWRHFGATYKDCDTDYAGQGVDQLASVIDKIRNNPTDRRILLSAWNPADLELMALPPCHMFAQFFVSNLDAYSKGQGKKHLSCQMYQRSCDLGLGVPFNIASYALLTYMIAKVTDCEPKELILAMGDAHVYKDHVQPLKAQLERDPLPFPKLKIERDVKDIDDFTFDDFVVQGYKCHGKIDMKMSV
PF00303	Ccor_FungiZyg	KENNAHPEYQYLNLIRHIIDNGEFRADRTGTGTLAVFAPPSLRFNLKDSFPLLTTKRVFFRGVAEELLWFVNGKTDAKLLQDKNIHIWDGNGSREYLDSIGLKDRREGDLGPVYGWQWRHFGAEYKDCDTDYTGQGVDQLMEVIDKVKNKPYDRRIVMSAWNPADLGKMALPPCHMFCQFYVSTPTPENPVPRLSCQMYQRSCDMGLGVPFNIASYSLLTLMIAHVCKIEPGEFILTMGDCHVYKDHVEALETQLQRTPNDFPTLKFKREITNIEDFVYEDFILENYNPQKKIEMTMSV
PF00303	Rirr_FungiZyg	EELQYLDLIRRIIEYGEHRKDRTGTGTLSIFAPPQLGFSLRDNILPLLTTKRVFTRAIIEELLWFIKGNTNSKHLTEKGIHIWDGNGSREYLDKIXLSHRKEGDLGPVYGFQWRHFGAEYIDCDTDYTGKGVDQLQEVIDKIKNTPNDRRIILSAWNPADLKKMALPPCHMFCQFYVSNTKRLSCLLYQRSCDVGLGVPFNIASYAILTHMIAHVTGCSPGEFIHTMGDTHIYNDHINALKTQIEREPKAFPRLKFRRKINNIDDFKYDDFIITGYEPHPQIKMKMSV
PF00303	Mcir_FungiZyg	HEEYQYLDLIKRIMDEGEHRADRTGTGTLAIFAPPQLRFSLKDDIFPLLTTKRVFYRGVLEELLWFVRGDTNSKHLSERNIKIWDGNGSREYLDKLGLTHRKEGDLGPVYGFQWRHFGAKYIDCDTDYTGQGIDQLQEVIDKIKHNPTDRRIILSAWNPADIPIMALPPCHAFCQFYVSTPPADGGRAKLSCVLYQRSCDMGLGVPFNIASYALLTRMIAHVTDLEPGEFIHTMGDTHVYVDHLDALKQQIEREPRPFPTLKFNRKITSIDDFKYEDFVLENYNPHSKLDMKMSV
PF00303	Rory_FungiZyg	HEEHQYLDLIKYIMEHGEHRADRTGTGTLAVFAPPQLRFSLKDDIFPLLTTKRVFFRGVLEELLWFIKGDTNSKHLNERNVKIWDGNGSREFLDKLGLTHRREGDLGPVYGFQWRHFGAKYVDCDTDYSGQGIDQLQQVIDTIKNNPTDRRIILSAWNPADIPIMALPPCHAFCQFYVSNPPSDGGRAKLSCVLYQRSCDMGLGVPFNIASYALLTRMIAHVTNLDPGEFIHTMGDTHVYIDHLDALKQQVTREPRSFPTLRINRKIDSIDDFKFEDFVLENYNPLSKIDMKMSV
PF00303	Mver_FungiZyg	RAEGQHEEHQYLNMLRHVMDHGEFRADRTGTGTCSIFAPPSMRFSLEDDVFPLLTTKRVFFRAVLEELLWFVKGDTNGLHLSEKGIKIWDGNGSREYLDKVGLSHRKVGDLGPVYGFQWRHFGAEYKDCDTDYTGQGVDQLAEVIWKIKNTPTDRRIIMSAWNPADLKNMALPPCHMFCQFYVSTPTEAQPRAKLSCQLYQRSCDMGLGVPFNIASYALLTKMIAYVTDLDCGEFIHTMGDTHIYLDHTEALKVQIEREPRPFPKLFIRPFQSVDGSEASTTTPRVIRDIDDFSVEDFVLEGYNPHKKIDMAMSV
PF00303	Pisp_FungiNeo	KIENEEELQYLNLIKKIINEGELRNDRTGTGTRAIFGPNPLRFSLKDHFPLLTTKKVFFRGVAEELFWFIRGDTDSKILSKKGVKIWEGNGSREFLDKIGLTEREEGDLGPIYGWQWRHFGAKYVDCHTDYTGKGKDQLRDVIDKIVNNPTDRRIIMSAWNPAE
PF00303	Spom_FungiDik	SEYRNTEEEQYLNLIRYILENGQSRPDRTGTGTRSVFAPPQLRFSLRNNTLPLLTTKRVFLRGVLEELLWFIHGDTNANHLSEKGIHIWDGNGSREFLDSRGLTDRKVGDLGPIYGFQWRHFGAQYVDCDTDYTNKGVDQLAQVISTLKLNPYDRRIILSAWNPLAIPEMALPPCHIFCQFYVSEPCKPGGKPQLSSMMYQRSADMGLGVPFNIASYSLLTHMIAHMCGYEAAEFVHVMGDCHIYNDHLEALQTQLERVPKAFPKLFFKRDAKDIGSIDSFSVDDFAVEGYNPYGPIKMKMSV
PF00303	Falb_Discicristoidea	EERQYLDLVQRAIEYGESRNDRTGVGTLALFGCSARYSLRDSFPLLTTKRVFWRGVAEELFWFLGARTDGKELSAKGIHIWDGNGSREFLDSRGLHHRREGDLGPIYGFQWRHFGAEYKDADTDYTGKGVDQIAQIIETIKTNPTDRRILFSAWNPPAIPEMALPPCHLMAQFYVNIERGELSCQFYQRSCDLGLGVPFNIASYALLTCLIAHCTGLRPGELIHIMGDTHVYKNHVDALKEQLKREPRPFPQLKINTTTTDINAITFEDLEIIGYNPHPRISMDMAV
PF00303	Crev_FungiZyg	SANSEEKQYLNLLEEILEKGERRGDRTGTGTIALFAPPQLRFNLADDTFPLLTTKRVFWRGVAEELLWFIRAQTDANVLRDKDIHIWDGNGSREFLDSRGLSHHREGDLGPVYGFQWRHFGADYVNADTDYSGQGVDQLAEVIRKIREDPTDRRIIMSAWNPADLGKMALPPCHMFAQFYVSNPCTEQATLSCQMYQRSCDMGLGVPFNIASYALLTRLIAQVTGLKPGHLVHCMGDTHIYSNHVDALKIQLKREPRPFPKMIIKRTPDNIEDFTMQDLEIIGYTPHGKIPMDMAV
PF00303	Bden_FungiChy	PHPELQYLDLVRQIIGTGDLRKDRTGTGTLSLFAPPQLRFSLADNTLPLLTTKRTFLRPVFEELMWFIRGQTDSKILAGKGVHIWDANGSREALDRAGLGHRQEGDLGPIYGFQWRHFGASYENADTDYTGKGIDQLEKVIEQLVSNPTDRRIILSAWNPLAIPDMALPPCHILAQLYVSTPSETHPVPRLSCQLYQRSCDMGLGVPFNIASYSLLTIMLAHVCGFEPGEFIHCLGDTHVYCNHIDALQTQLERTPRPFPKIKVARLVREMETFEYEHIDVVGYTPHNKIAMDMSV
PF00303	Spun_FungiChy	HPEHQYLSLIRTILQQGYPRADRTGTGTLSLFAPPQLRFSLAENSFPLLTTKRVPLRIVFEELMFFIRGQTDSTILSKKGVKIWDGNGSREALDRIGLVDRRVGDLGPVYGFQWRHFGAEYVNADEDYKGKGVDQLREVIRLIKENPADRRIIMSAWNPADLSKMALPPCHMFCQFYVSTPTPTQPATLSCQLYQRSCDMGLGVPFNIASYALLTILIAHVTNLVPGEFIHCLGDAHVYKDHIDALKVQLEREPRPFPRIYIKGGESKATTVNEMVKELEEFEWERLELVGYEPYGKIEMKMSV
PF00303	Rall_FungiCry	PNKAHEEYQYLELIKKIVEERNVKDDRTGTGTVSLFGAQMRFSLRDNTLPLLTTKRVFYRGVLEELLWFVKGDTNSNHLKEKNVRIWDGNSSKEYLESIGLGHREEGDLGPVYGFQWRHFGAEYIDYNADYTGKGIDQLQTIIERIKTNPNDRRLIVSAWNPVGKSCDMGLGVPFNIASYSLLTIMIAHVCGLKPGEFIHTLGDAHVYKDHIGPLKIQLDREPRPFPKVSIKPGVKRNNIDEFEFEDFVLEGYNPHGKIQMNI
PF00303	Amac_FungiBla	TPEPRHEEEQYLDLIRTILATGEERPDRTGTGTVSLFAPPQLRFSLRNNTFPLLTTKRVFWRGVAEELLWFLRGDTSATRLAAKNVHIWDANGSRAFLDSVGLHHRPEGDLGPVYGFQWRHFGADYKGCDADYTGQGVDQLADVVQQLKSNKPSRRILMSAWNPAALKDMALPPCHLLAQFYVSTPARKRVNGAVPAGLSDEPKEELCCLLYQRSADVGLGVPFNIASYALLTRLLAHATGLEAGEFIHVMGDAHVYRDHEQALAVQCKREPRPFPTLLIKREPGTVAIDEFTMDDLELVGYKPHPKIDMVMSV
PF00303	Cang_FungiBla	AHAHEELQYLNLIRDILDRGELRPDRTGTGTLSVFCPAPMRFSLRNNALPLLTTKRVFVRGVIEELLWFLRGDTNALHLSAKGVKIWDGNGSREFLDKLGLTHRAEGDLGPVYGFQWRHFGAAYGTCDDEYEGKGVDQIKDIVQQLRNDKYSRRIILSAWNPAALKDMALPPCHVLAQFYVSRRGAPRGAEAAAAAEANGYDATTADGHQDQEEEEELCCMLYQRSADVGLGVPFNIASYAILTRILAHVVGLEAGELVHVIGDAHVYRDHIEPLKVQLERVPRPFPTMTINRDVGSVEVDGFQVDDFVIDGYRPHGKIDMKMSV
PF00342	Acas_Amoebozoa	QVHMRDLFAQDPERFRRYSFEWNDGALLLDYSKNIITDDTLRLLRQLAADCDIKGWTEKMFNGEKINFTENRPVLHVALRNRSNRAIMVDGEDVMPAVNKVLQQMKEFTNSIRSGEWKGWTGKAITDVVNIGIGGSDLGPLMVCEALKPYANGKLNVHFVSNVDGTHIAEAVKRLNAETTLFIVASKTFTTQETITNANSARDWLLKSLNAPKDAVAKHFVALSTNEEGVTKFGIDKANMFAFWDWVGGRYSLWSAIGLSIATYIGFENFEELLTGAHEMDEHFRTAPIEQNLPITLAVLGVWYNNFFGAETHAILPYDQYMHRFPAYFQQGDMESNGKGVDRQGNRINNYSTGPIIWGEPGTNGQHAFYQLIHQGTKLIPADFLAPIETQNKVGNHHM…
PF00342	Ppol_Amoebozoa	LLDYSKNIITEETLALLLKLAEQADVQGWTKKMFDGEKINITEDRAVLHIALRNRSNGKIVVDGANVTDSVNATLAQMRNFTERVRSGEWKGYTGKQITDFVNIGIGGSDLGPVMVTTALTPYARDDLHVHFVSNVDGTHIAEITKRYCPETTLFLVASKTFTTQETMTNAHSARDWFLKAAGVARAVALHFVALSTNAAEVKKFGIDTANMFEFWDWVGGRYSVWSAIGLSGMDNFEEFLLGGHELDEHFRTTPLDKNLPVILGLVGLWYNNFWGAQTQAILPYDQYLSRFAAYFQQGDMESNGKGINRDGHRVDYSTGPIIWGEPGTNGQHAFYQLIHQGTKLIPCDFIAPIETHNPIGQHHKILLSNFFAQTEALMKGKTEQEVRAELTKEGVTGE…
PF00342	Colp12	LSESPAYAALKAHFDSVLKNAAMRDLFTADPHRFEKFSTSLDTPDGKLLVDFSKNIMTEETLKLLLDLARQAGLEEWRDKMFAGEKINFTEGRAVLHVALRNRSNRPILVDGKDVMPDVNAVLAQMRTFTEAVRSGSWKGYTGKAITDIINIGIGGSDLGPVMVSEALKSFSKRDLNVHFVSNVDGTHLAEVLRKLNPETALFIIASKTFTTQETITNATSAKTWFLESAKDPAAVAKHFVALSTNKTECVKFGIDPVNMFAFWDWVGGRYSLWSAIGLPIACSIGMDNFEQLLAGAHHVDNHFTTTPLEKNIPVLLALVGILYNNFFGAQTTAILPYDQYMSRFAAYFQQGDMESNGKFVTRTGEKVDYQTGPIVWGEPGTNGQHAFYQLIHQGTKLI…
PF00342	Sdes_IchthyosporeaDermocystida	YEQEGKFLVMKMLFEEDPNRFEKYSQLFKEGEAQILVDFSKNIVNESTMEHLFNLARQSGVEEFREKMFSGQRINFTENRPVLHIALRNQSNTPILVDNVDVMPLVNAVKSKMRKFCDAIRSGEWKGYTGKKITDVVNIGIGGSDLGPVMVTEALKPYAGNIRVHFVSNIDGTHLAEVLKRLNPETSLFIIASKTFTTQETITNANSAKTWFLNSCKNEAAVAKHFVALSTNQKDVTKFGIDSANMFEFWDWVGGRYSLWSCIGLSIAVYIGMDNFEALLSGAHAMDQHFRNSPLESNIPVILALLGVWYNNFWKAETHAILPYDQYLHRFAAYFQQGDMESNGKYVSRDGMAVHYSTGPIVWGEPGTNGQHAFYQLIHQGTKVIPCDFLAPVQSHNPI…
PF00342	Nk52_Ichthyosporea	NPCFVQLKEHYEQEIKHLHMRKMFQDDAHRFSKFNVLFNGSDGDLLLDYSKNIVTEKTMKLLFSLACEAGVTNMRDKMFAGEKINFTEDRAVLHIALRNRSNKPIVVDGVDVMPGVNAVLDKMRTFCDSVNSGQWRGYTDKGITDVVNIGIGGSDLGPVMVTEALKPYAGNLNIHFVSNVDGTHLAEVTKKCNPETTLFIIASKTFTTQETITNANSAKTWFLQTAKSPSAVAKHFVALSTNKAEVTKFGIDPDNMFEFWDWVGGRYSLWSAIGLSIAVYIGMDNFVQLLEGAHAMDRHFQTAKMEENLPVVLAVLGVWYNNIVGAQTHAILPYDQYMHRFAAYFQQGDMESNGKTVTREGDFVQSSTGPIVWGEPGTNGQHAFYQLIHQGTKIIPCDF…
PF00342	Cowc_Filasterea	TDTPAWKALQEHYDTKASKWQMRDLFQADPARFETFSRVLKQGGNNENGDFLLDFSKNVITDETFKLLLALARERGVEQMRDKMFKGDKINITEDRAVLHIALRNRSNKPILVDGVDVMPEVNDVLKRMRVFVDKVRSGEWKGFTGKAITDVVNIGIGGSDLGPVMATEALKSYSSHLNVHFVSNIDGTHLAEATKRLNPETTIFVIASKTFTTLETITNANSAKEWILAAAKDVSAVAKHFVALSTARPLVEKFGIDANNMFPFWDWVGGRYSLWSAIGITIALYIGMDGFEELLAGAHEMDNHFATAPLEQNLPVILGLLGVWYNNFFGAQTHAILPYDQYMHRFAAYFQQGDMESNGKSVTRDGKAVKTSTGPIVWGEPGTNGQHAFYQLIHQGTK…
PF00342	Awhi_IchthyosporeaIchthyophonida	PAWKALQAHFDAEGDKINIRNLCADSDRFDKYSKTFSGSTNEEILVDFSKNRVTDETMKLLYALARERGLEKFRDQMFSGEKINFTEDRAVLHIALRNRSNTPIMVDGKDVMPEVNEVLANIRTFVTSVRDQSWKGYTGKSITDVVNIGIGGSDLGPVMATEALKPYAQDNLNLHFVSNIDGTHVAETLKKCDPETTMFLVASKTFTTQETMTNAHTARSWFLKSAGDEAHVAKHFAALSTNAKGVSEFGIDTKNMFGFWDWVGGRYSLWSAIGVPIALAIGMDNFEAMLEGAHEMDQHFCSAELEDNLPVTLALVGIWYNNFYGAETHAILPYDQYMHRFAAYFQQGDMASNGXSVARSGEFVNYSTGPIVWGEPGTNGQHAFYQLIHQGTKTVPCDF…
PF00342	Pgem_IchthyosporeaIchthyophonida	WKALQSHYDSEGDKINIRELCSDKGRFEKCSLKFNPKDGEEILLDYSKNRVNDTTMELLYNVAREAGVEEMRNKMFSGEKINFTEDRAVLHIALRNRSNTPIMVDGKDVMPEVNDVLERMRTFTESVRGGEWTGYTGKKITDVVNIGIGGSDLGPVMVTEALKPYGKADLNLHFVSNIDGTHIAETLKKVNQETTLFLIASKTFTTQETMTNAHTARTWFLDAAKDQAHVAKHFAALSTNASGVGDFGIDTNNMFGFWDWVGGRYSLWSAIGMPIALYIGMDNFIEILEGGHAMDKHFTSAPLEENIPATMALVGIWYNNFYGAETHAILPYDQYMHRFAAYFQQGDMESNGKGVARNGESVNVSTGPIVWGEPGTNGQHAFYQLIHQGTKIVPCDFML…
PF00342	Apar_IchthyosporeaIchthyophonida	WKALQAHYDAQGASIDIKQLIREPTRFEKYAHTFNGKDGDILVDFSKNRVTDETMKLLIDLAKECKVEEWRDKMLNGEKINFTEDRAVLHVALRNQSNRPIIVDGKDVMPEVNAVLAHMKEFTEQVRSGQWKGYTGKPITDIVNIGIGGSDLGPVMVTEALKPYGQAGLNVHFVSNVDGTHIAETLKKINAETALFLIASKTFTTQETMTNAETARLWFLEHAKDQAHIAKHFVALSTNTKAVAAFGIDTKNMFEFWDWVGGRYSLWSAIGLSIALFIGFDNFEQLLKGAHDLDNHFTSAPLEQNIPVLMAMLGVWYNNFYSAQSYAILPYDQYMHRFAAYFQQGDMESNGKFVTRSGAEVDYSTGPIAWGEPGTNGQHAFYQLIHQGTKIIPCDFLMA…
PF00342	Ihof_IchthyosporeaIchthyophonida	DPKRFEKYAKTFEGKDGKIMVDFSKNRVTDETMKLLFDLVRECKVEDWRSKMFSGEKINFTEDRAVLHTALRNRSNKPVIVDGKDVMPEVNAVLAHMREFTEQVRSGEWKGYTGKAITDIVNIGIGGSDLGPVMVTEALKPYAKEGMNVHFVSNVDGTHIAEILKKVNPETVLFLVASKTFTTQETMTNAESARWFLERAVDKAHVAKHFAALSTNSKGVAAFGIDTKNMFEFWDWVGGRYSLWSAIGMSIALYIGMDNFEAILEGGHALDNHFTSTPLEENIPVIMAVLGVWYNNFYGAQTYAILPYDQYMHRFAAYFQQGDMESNGKFVTRSGEEADYSTGQIAWGEPGTNGQHAFYQLIHQGNKMIPADFLFPVETHNPVQHGVHHDILASNFFAQ…
PF00342	Ihou_IchthyosporeaIchthyophonida	HRAVLHTALRNRSNKPVIVDGKDVMPEVNAVLAHMREFTEQVRSGEWKGYTGKAITDIVNIGMGDMESNGKFVTRSGEEADYSTGQIAWGEPGTNGQHAFYQLIHQGNKMIPADFLFPVGTSEETIKLILPHKVFKGNRPTNSIMFQKMTPYTLGWLVALYEMKIFVEGMIWDINSFDQWGVELGKQLAK
PF00342	Cfra_IchthyosporeaIchthyophonida	MSLTSSPAWKALQTHFDTTGKNIKITDETAKPDRFEKMSHIHKTGGGDILVDFSKNSVTDETMKLLFDLANQANVTSMRDKMFSGEKINFTEDRAVLHVALRNRSNTPIIVDGEDVMPEVNAVLDHMKEFTESVRNGVWKGYTGKVITDIVNIGIGGSDLGPVMVCEALKPFAKRDLNMHFVSNVDGTHIAETLKKVNAETVLFLVASKTFTTQETMTNAKSARSWFLEQVGGDKRHVEKHFAALSTNAKDVEEFGIDPKNMFGFWDWVGGRYSLWSAIGTPIALSIGFDNFVELLTGAHGMDKHFQTAPLEKNIPVIQALIGIWYNNFHGAETYAILPYDQYMHRFAAYFQQGDMESNGKFVTRDGSEVDYSTGPIAWGEPGTNGQHAFYQLIHQGTK…
PF00342	Ccor_FungiZyg	YQALDQHYNTEGKNLKLQELFAGDKERFTKYSREFKGKLTDATILLDFSKNIINESTFQLLLDLAKEAKVDEYAKKMFSGSPINFTEGRSVLHIALRNVSNNPIYVNEQDVVPEVNAVLDHMKEFSEAVRSGAWTGYTGKRITDIVNIGIGGSDLGPVMVTEALKPYAQEGLNVHFVSNVDGTHLAETVKKINPETSLFIIASKTFTTQETLTNANSAKEWFLGHAKEQQHVSKHFVALSTNTEEVTKFGIDPKNMFQFWDWVGGRYSLWSAIGLSIALYIGFDNFHQLLSGAHDMDNHFINTPFEDNLPVILAILGVWYNNFFGAQTQAILPYDQYLHRFAAYFQQGDMESNGKYVTRDGETVNYSTGPIIWGEPGTNGQHAFYQLIHQGTKLIPADF…
PF00342	Rirr_FungiZyg	AWRKLQSHYDNEGKNLIMRDLFAQDKNRFNTFSRQFKGERTGASILLDFSKNIITNDTFAALIGLAREADVEGFREKMFNGEHINFTEDRAVLHIALRNVSNKPILDNGEKVMPGVNEVLEQMKKTSNAIRDGSWTGYTGKSITDIVNIGIGGSDLGPVMVTEALKPYAKPGLNVHYVSNIDGTHLAETLKKLNPETSLFIIASKTFTTQETITNATSARDWFLATAKDNKHVAKHFVALSTNTNAVVSFGIDPANMFKFWDWVGGRYSLWSAIGLSIAIYIGYDNFHELLSGAHDMDLHFRXTPLENNLPVILGVLGVWYNNFFGCQTHAILPYDQYLHRFPAYFQQGDMESNGKYVSRSGQNVNYSTGPIIWGEPGTNGQHAFYQLIHQGTKIIPAD…
PF00342	Mcir_FungiZyg	MVLANKLNTWSKLQQYYDSEGKNIVIKEQFEKDPKRFEKYHRVFKGTDKTNTSILFDFSKNRVTDETLQLLLELAKEAKVEEMRNKMFAGEHINFTEDRAVLHVALRNLSDKPIYDNGEDVMPEVREVLAHMKEFSESVRSGEWKGYTGKRITDIVNIGIGGSDLGPVMVTEALKPYAQEGLKPHYVSNIDGTHLAEVLKSVNPETTLFIIASKTFTTQETITNAESAKSWFLDAAKDASHVAKHFVALSTNTELVTKFGIDAKNMFKFWDWVGGRYSLWSAIGLSIAITIGYQNFEDLLRGGHEMDQHFVNTPLEENIPVLMALVGLWYNNFFGAQTEAILPYDQYMHRFPAYFQQGNMESNGKYVSRSGEEVQAQTGPIIWGEPGTNGQHAFYQLIH…
PF00342	Rory_FungiZyg	WSKLQEHYDAEGKSFVIKKLFEKDPQRFEKYHRVFKGSDKTKSSILFDFSKNRVSDETLKLLLELAKEAKVEEMRSKMFTGEHINFTEDRAVLHIALRNLSDRPIYDNGADVMPEVREVLAHMKQFSEAVRSGEWKGYTGKTITDIVNIGIGGSDLGPVMVTEALKPYAKEGLKAHFVSNIDGTHIAEVLKSVNPETTLFIIASKTFTTQETITNAESAKEWFLASAKDVSHVAKHFVALSTNTKLVTAFGIDAKNMFKFWDWVGGRYSLWSAIGLSIAITIGYDNFEELLRGGYEMDEHFVNAPLEENIPVLMALVGLWYNNFFGAQTEAILPYDQYMHRFAAYFQQGNMESNGKYVSRSGAEVEAQTGPIIWGEPGTNGQHAFYQLIHQGTKVIPCD…
PF00342	Mver_FungiZyg	KLKAWHALQAHHDSQADKTVMKELFAKDPARFQEFSRHFSGPTTKSSILLDYSKNLITPETFKYLIDLAKEAGVEQMRTKMFSGEPINFTENRSVLHVALRNVSNTPIYSEGKNVMPEVNAVLEHMREFTESVRSGEWKGYKGDQIKDIVNIGIGGSDLGPVMVTEALKPYATEGGLKVHFVSNIDGTHIAEVLKTVKPETTLFIIASKTFTTQETITNATTAKTWFLKHAKEQSHVAKHFVALSTNTEAVTKFGIDAANMFQFWDWVGGRYSLWSAIGLSIALYIGFDNFKELLTGAHEMDQHFVNTPLEQNLPVILAVLGIWYINFFDAQVHAILPYDQYMHRFPAYFQQGDMESNGKYRNRDGEALPYGSGPWVVGEPGTNGQHAFYQLIHQGTRI…
PF00342	Bden_FungiChy	MTGITDKSAWKALQNHYDTVGCKLNLKELFAANPNRFDQLHTTFTANGSTQPGLLLDYSKNILTSDTLALLFNLARESDVQVWRDRMFKGEAINTTEQRAVLHVALRNVSNSDIHVHGKSVVPDVNKVLAQMKSISDSIHSGSWKGYTGKAITDIVNIGIGGSDLGPVMVTEALKPYAKKGISVHFVSNIDGTHIVETLKTLSPETTLFIVASKTFTTIETITNANTAKTWFLNEAKNAEHVGKHFVALSTNAKAVSAFGIDVKNMFEFWDWVGGRYSLWSAIGLSISLYIGFDNFHELLAGAHAMDTHFQSAPLEKNMPVILALIGIWYNNFFGAQTHAILPYDQYLHRFPAYFQQGDMESNGKSTTRDNKPITNYSTGPIIWGEPGTNGQHAFYQLI…
PF00342	Spun_FungiChy	SSVTSSPAWQAVQKHYDTHGRALKLRELFAQDPSRFDKFHTTFTPANASHPALLVDFSKNIITEESLKLLINLVRESKVEEWRDKMFAGEKINTTEDRAVLHVALRNRSNTPIYVDGKDVMPDVNRVLEQMKRTSEAIQSGEWKGYTGERITDVVNIGIGGSDLGPYMVTEALKPYGHPALTMHFVSNVDGTHIAETLKRCKPESTLFIVASKTFTTIETITNATTAKNWFLERAKDPAHVAKHFVALSTNTKAVTAFGIDPQNMFEFWDWVGGRYSLWSAIGLSIAIYIGFNNFVELLSGGHAMDNHFRNTPLEQNIPVILGAIGIWYNNFFGAQTHAILPYDQYMHRFPAYMQQGDMESNGKSVTRDNQPITDYQTGPIIWGEPGTNGQHAFYQLIH…
PF00342	Pisp_FungiNeo	PAWKALQDYYNTKGKDLNLCKLFKEDSNRFVNFSTTFTPQNGDKPTILLDYSKNLVDDKVMKLLMDLAKESQVAEWRDKMMNGETINFTEKRSVLHIALRNRSNRPIYVKGENVVPKVNAVLDHMKEFSDSVRSGEWKGYTGKAITDVINIGIGGSDLGPVMVTEALKPYSRPNLRVHYVSNIDGTHIAETLKKIDPETSLFIIASKTFTTIETITNANTAKEWFLQKAKDKKHIAKHFVALSTNAKGCQEFGIDVKNMFEFWDWVGGRYSLWSAIGLSIALYVGFENFIDLLTGAHAMDEHFRTAPFEKNLPVILALLGIWYNNFFGADSHAILPYDQYLHRFPAYFQQGDMESNGKYITRDGKRVNYQTGPIIWGEPGTNGQHAFYQLIHQGTKMIP…
PF00342	Amac_FungiBla	MAPANTLPAWKALQAHFDAVGKTFDMRSAFASDAERFSRFSAEFQADDDAHILLDYSKNRVSQQTLDLLLQLVRDAGVEQMRGKMFAGEAINFTEGRAVLHVALRNRSNTPIVVDGKDVMPEVNGVLAQMRVFADSVRSGEWKGYTGKPITDIVNIGIGGSDLGPYMVTEALKPYGHERLRVHFVSNIDGTHLAEVLKKVNAETVLFIVASKTFTTQETITNAQSAKAWFLEHAREPAHVAKHFVALSTNTKAVTTFGIDPANMFQFWDWVGGRYSLWSAIGLSIALYLGPDHFEDLLAGAHAMDRHFVETPLEHNLPVLLAVLGIWYNNFYGAETHAILPYDQYLHRFAAYFQQGDMESNGKYITRSGAKVTYSTGPILWGEPGTNGQHAFYQLIHQG…
PF00342	Cang_FungiBla	ACTSLPAWKKLEAHYAAAGKSFDMRTAFAQDPSRFATLSKQFQAENVHLLLDYSKNLVSTETMALLTDLVREAKVPEMRDAMFSGEKINFTENRAVLHVALRNRSNRAIHVDGEDVMPEVNKVLAQMRTFSEKVRSGQWVGYTGKRITDVVNIGIGGSDLGPFMVTEALKPYGHKDLKMHFVSNIDGTHLAEVLKKLNPETALFIIASKTFTTQETITNALSARSWFLQHAKESAHVAKHFVALSTNAKECTAFGIAPENMFAFWDWVGGRYSLWSAIGLSIALYIGFDNFEKLLAGAHAMDNHFVNAPLEANLPVILAVLGVWYNNFFGAQTQAILPYDQYLHRFAAYFQQGDMESNGKYVTRDGSLAATSTGPIIWGEPGTNGQHAFYQLIHQGTKL…
PF00342	Mbre_ChoanoflagellataCraspedida	AATGWTPELQNCAHYDAKGKNLDMRELFAADSKRFDDFSLKLDLADGPFLVDYSKNRVDAETMKLLYDVARERQVEAGRDQMFKGEKINFTEDRAVLHVALRNRSNDPIKVDGQDVMGDVNAVLDHMREFVGAVRSGSWKGYTGQAITDVVNIGIGGSDLGPLMVTEALKPYGGPINVHFVSNIDGTHMAETLKRINPETSLFVIASKTFTTQETITNATTAKEWFLAKAQDQAHIAKHFVALSTNKEKVSAFGIDTANMFEFWDWVGGRYSLWSAIGMSIALYIGFENFEALLAGAHDMDNHFCTAPLEKNVPVTLALLGIWYNNFFGAQTHALLPYDQYMHRFAAYFQQGDMESNGKYVTRDGSEVTTSTGPIVWGEPGTNGQHAFYQLIHQGTKLV…
PF00342	Sros_ChoanoflagellataCraspedida	KALQEHYDTVGKSLNMRELFASDAKRFKDFSLKLDFGEGDFLVDFSKNRVNKDTMKLLFDLARERGVEAGRDKMFSGEPINFTEGRSVLHIALRNRSNTPILVDGKDVMPSVNAVLDHMKEFTEAVRSGAWKGYSGKAITDVVNIGIGGSDLGPYMVTEALKPFGGPINVHFVSNIDGTHMAEALKKVNPETTLFVVASKTFTTQETITNATTAKNWFLETAKDHAHIAKHFIALSTNKEKVAEFGIDTANMFEFWDWVGGRYSLWSAIGMTIALYVGFDNFAELLAGGHAMDQHFKTAPLEQNVPVVLALLGIWYNNFFGAQTHALLPYDQYMHRFAAYFQQGDMESNGKYVTRDGSKVSVSTGPIVWGEPGTNGQHAFYQLIHQGTKLVPADFIAPV…
PF00342	Dcos_ChoanoflagellataStephanoecidae	LDMRLLFAEDKERFTKFSLVTDFGDGDFLIDFSKNIITTETLSLLFDLAKECDVIGERDAMFRGDKINTTEVRAVLHTALRNRSNQPVLVDGKDVMPDVNGVLQRIRKFSDDVRSGTWKGFTGKRITHLVNIGIGGSDLGPLMVTEALKPYADVITPIFVSNIDGTHMAEALKQVDPETTLFLVASKTFTTQETMTNANTAKAWLLEKLKDPTAVAKHFAALSTNKDGVTAFGIDPENMFGFWDWVGGRYSLWSAIGTSIALTIGMDNFEQLLEGAHAVDNHFKTAPLEKNAPVILALLGVYYNNFYGAQTHALLPYDQYLHRFAAYFQQGDMESNGKGVTKSGNPVGVSTGPIVWGEPGTNGQHAFYQLIHQGKKMVPADFIVPVTTQNPISGGKHHN…
PF00342	Hnan_ChoanoflagellataAcanthoecidae	ARSMSAAMVALEEHFEVEGKTMDMRKLFAADPERFKKFSMTLDFGDGDFLYDYSKNIVSEKTLGLLLDFCRERGVEAARDKMFSGEKLNITEDRAVLHVALRNRSNTPIIVDGEDVMPKVNGVLGRLREFTEAVRNGVWKGFGGKAITDIVNIGIGGSDLGPLMATEALKPFAGALKVHFVSNIDGTHVAETLKLVDPETTLFLVASKTFTTQETMTNAKSAKSWLLDHFKDTKAVASHFAALSTNTKGVAEFGIDTKNMFEFWDWVGGRYSLWSAIGASIALYIGMDHYEELLAGAHAADKHFTSAPLEQNASVLMAVIGVWYNNFHGAQTHALLPYDQYMHRFAAYFQQGDMESNGKGVTREGEPVSMSTGPIVWGEPGTNGQHAFYQLIHQGRKMV…
PF00342	Aque_Metazoa	SLTSSPEYKELKAHFETEAKGWHMRSLFQGDSGRFDKFKLELVGDDGAILFDYSKNIINEKTIELLFKLARGRGIEKMRERMFSGDKINFTEDRAVLHIALRNRSNRPILVDGKDVMPEVNGVLKQMRTFTEAVRSGEWKGYNGKKITDVVNIGIGGSDLGPYMVTEALKPYGREGPRVHYVSNIDGTHLFEVLNKVSPDTTLFIVASKTFTTLETITNATSAKQWLLDTAKDPAAVAKHFVALSTNEAKVTAFGIDKANMFAFWDWVGGRYSLWSAIGLSIAVSIGMDNFEKLLAGAHFVDEHYRTTPLEKNVPAVMGLLGVWYNNFFGAQTHALLPYDQYLHRFAAYFQQGDMESNGKSVTRSGDRVSYSTGPVVWGEPGTNGQHAFYQLIHQGTKV…
PF00342	Bflo_Metazoa	SLTTDPAWKSLEIYHAEHGNRLNMLRMFREDPNRFDKFSIKQQTQDGDYLFDYSKNLLNEEIFRMLMQLARNRGVEQYRDRMFSGDKINFTEDRAVLHVALRNRSNRPMMVDGVNVMDDVNRVLKQMKDFTESVRNGQWKGYTGKTITDIVNIGIGGSDLGPKMVCESLRPYAKPGLNVHFVSNIDGTHIAERVFKNLNPETTLFMIASKTFTTQETLTNANSAKAWFLEKARQPQEVAKHFVALSTNAEKVKAFGIDTKNMFEFYDWVGGRYSLWSAIGLSIACYIGFDNFEQLLQGAHYMDNHFQNTPLEKNIPVIMAMLGVWYHNFYGAETHAILPYDQYMKRFAAYFQQGDMESNGKYITRHGHRVNYTTGPIVWGEPGTNGQHAFYQLIHQGTR…
PF00342	Skow_Metazoa	LPSLAENEWFVGLKEYHAKNASKLNMPNMFQKDPDRFDKFSIKLNTEDGDLLLDYSKNIINEEILGMLVQLAKSRSLEQVRERMFCGEKINFTENRAVLHIALRNRTNHPIMVDGKDVMPDVNKVLADMRQFTKSVRSGEWKGYTGKSITDVINIGIGGSDLGPVMVTEALKYYGTGPRVHFVSNIDGTHLAEVTKQLNPETSLFIIASKTFTTQETITNATSARTWFLGTAKNPAAVAKHFVALSTNGEKVEAFGIDKKNMFGFWDWVGGRYSLWSAIGLSIAIYIGMDSFEALLSGAHFMDNHFRKAPLEANVPVILALLGVWYHNIYGAESHAILPYDQYMHRFPAYFQQGDMESNGKYVTRSGQKVDYTTGPIIWGEPGTNGQHAFYQLIHQGTR…
PF00342	Ctel_Metazoa	LTTEPSFQALLDYFNKNGSGITMRDMFKTDPKRFEKFSRTLKTGDGDLLLDFSKNLINEDVLQLLLNLAKARKVESFRDAMFAGSKINFTEDRAVLHVALRNRSNDPIIVDGKDVMPDVNRVLGQMRTFSDKVRSGEWKGYTGKAITDVINIGIGGSDLGPYMVTEALKPYAGDIKVHFVSNIDGTHMAETLKKLNAETSLFIIASKTFTTQETITNAESAKAWFMDSAKDKAAVAKHFVALSTNGPKVKDFGIDERNMFEFWNWVGGRYSLWSAIGLSIACYLGMDNFEAMLSGAHFMDQHFKTAPMQDNIPILLALIGVWYHNFFGADSYTLLPYDQYMHRFAAYFQQGDMESNGKYITRNGQRVTYTTGPIAWGEPGTNGQHAFYQLIHQGTRLIP…
PF00342	Lgig_Metazoa	LTTEPSWQKLSSFFDRHGSKLNILQMFNEDPQRFQKYSLSVNTKDGDILLDYSKNLINDEVLGNLFQLAKERKVEEMRDAMFSGEKINFTENRAVLHTALRNQSNKPIMVDGKDVMPDVNGVLQHMREFTEEVRSGKWKGYTGLAITDIVNIGIGGSDLGPLMVTEALRPYKSNLNAHFISNIDGTHLAKTLQDLNPETTLFIIASKTFTTQETITNATSAKNWFLEKAKDPSAVSKHFVALSTNASKVKDFGIDEKNMFGFWDWVGGRYSLWSAIGMSIALVVGMDNFIDLQAGAYFMDQHFCTTPLEKNLPVILALLGVWYHNFYKAESIALLPYDQYMHRFAAYFQQGDMESNGKYITRSGQRVNYTTGPIVWGEPGTNGQHAFYQLIHQGTRLIP…
PF00342	Dpul_Metazoa	AFLTEDAAFLNLQKYFQEKGKDLNIHQLFVQDPERFKKYSIKLATPQDGEILIDFSKNRVDAETFKLLLELAKSRKVQESRDAMFGGEKINFTENRAVLHTALRNRSGRPVLVDGVDVMPDVRAVLDHMKEFCSEVISGQWKGYTGKAITDVVNIGIGGSDLGPLMVTEALKAYSVGPNVHFVSNVDGTHIAVTLQKLNPETTLFIIASKTFTTQETITNAESAKAWFLEKAKDESTVAKHFVALSTNATKVRDFGINEKNMFGFWDWVGGRYSLWSAIGLSIALSIGFENFEKLLGGAYFMDQHFCESPLEQNVPVILALLGVLYGDFYGAETHALLPYDQYLHRFAAYFQQGDMESNGKYVTRSGRRVEYATGPVVWGEPGTNGQHAFYQLIHQGTR…
PF00342	Adig_Metazoa	SLTQCPEFSALKSHYEAASKLHMRDLFAKDPKRFEKFSAQIDTKDGTILVDYSKNIITDETMKLLMNLAKARGVETLRQKMFSGEKINFTEDRAVLHIALRNRSNKPIMVDGMNVMDDVNRVLTQMRKFTEDVRSGSWKGYTGKPITDVVNIGIGGSDLGPLMVTEALKPYGKDGLHVHFVSNIDGTHLAKTVATLNPETTLFIVASKTFTTIETITNAKSAREWLLKKLKDKSAVAKHFIALSTNEEKVKEFGILKENMFAFWDWVGGRYPADFLAPVETQNPIADGVHHTILLANFLAQPEALMKGKTTEEARVELEKSGKSGETLEKILPHKVFSGNKPTNSIMFQKLTPFILGALIAMYEHKIFCQGVIWDINSYDQWGVELGKQLAKAIQPELE…
PF00342	Nvec_Metazoa	MSSLTSSPEWAALEQHHKSTALALHMRKLFQEDANRFEKFSTFLDTSHGRLLVDYSKNIVTEETMKLLFRLANARGVKSMCQKMFSGEKINFTEDRAVLHIALRNRSNTPILVDGKDVMGDVNAVLTQMRSFTEDVRTGTWKGHTGKAITDVINIGIGGSDLGPLMVTEALQPYGKKGLNVHFVSNIDGTHLAKTLAELNPETSLFIIASKTFTTIETITNATSARKWLLDHLKDKSAVAKHFVALSTNEPKVTEFGISKDNMFAFWDWVGGRYSLWSAIGLSIAIYIGMDNFEALLSGAHAMDNHFKDAPLENNLMIPVILALLGIWYNNFFGAQSHGMFAYDQYMHRFAAYFQQGDMESNGKFMTRFGEEVDYSTGPIVWGEPGTNGQHAFYQLIHQ…
PF00342	Ocar_Metazoa	EEHHRSASKLKMRDLFDKDPNRFKKFSLTLPTGDEGDLLLDFSKNILTEETLKLLFDLAKSADVAGMRDKMFRGEKINFTEDRAVLHIALRNRSNTPILVDGQDVMPDVNKALAHLKQFSDDVRSGAWTGYTGEAITDIVNIGIGGSDLGPLMATEALKPYGGRVSVHFVSNIDGTHLAKTLKGLKPQTTMFVVASKTFTTIETITNATSARTWLLDAAKDPAAVAKHFVALSTNAAKVKEFGIKEENMFVFWDWVGGRYSLWSSIGLTIALYVGYDNFERFLAGAHFMDNHFKTAPLEKNIPVILALLGVWYNNFFGAQTHGIFPYDQYMHRFAAYFQQGDMESNGKSVTRSGSFCDYSTGPIVWGEPGTNGQHAFYQLIHQGKKLIPGDFIAHVQSH…
PF00342	Xtro_Metazoa	ALSCDPVYQKLSQWYEAHHAGLNMRQMFEADKGRFSKFSKTLVTDHGDILLDYSKNLINEDVMKLLIELAHSRGVESARQKMFSAEKINFTENRAVLHIALRNRSNTPTLLEGKDVMPEVNAVLEKMKAFCQKVRSGDWKGYTGKAITDVVNIGIGGSDLGPLMVTEALKPYSKGGPRVWFVSNIDGTHIAKTLAELNPETSLFIIASKTFTTQETITNAETAKEWFLNSAKDASAVAKHFVALSTNAPKVKDFGIDTANMFEFWDWVGGRYSLWSAIGLSIALHIGYDNFEKLLAGAHWMDNHFYKTPLENNVPVLLAMLGVWYINFYGCETHALLPYDQYMHRFAAYFQQGDMESNGKYITRTGARVNYNTGPVVWGEPGTNGQHAFYQLIHQGTRR…
PF00342	Nspp_Discicristoidea	GVTLQALFGADAQRFERLSVEFAGREGPVLLDYSKNLVDERALALLLQLARDMRVPEMAQAMFRGDAINLTEHRAVLHTALRNRSNRPVYVDGQDVMPQVNKVLEQMAVFSKVVREGAWRGFTGKAITDVVNIGIGGSDLGPVMVTEALKAHARPNLRVHFVSNVDGAHIAETLKPCDPETTLFIIASKTFTTQETITNANTAKAWLLERAKEPSAVAKHFVALSTNQAGCRAFGIDVANMFEFWDWVGGRYSLWSAIGLSIAIYVGMDVFVDLLAGAHDMDQHFLAAPLEKNLPVLLACLGVWYNNFWDAQSHAILPYDQYLSRFPAYSQQGDMESNGKSVTRQGEQVDYSTGPIIWGEPGTNGQHAFYQLIHQGTKLIPSDFLAAVEPVAPVSSGLH…
PF00342	Rall_FungiCry	INLSKEFEANKNRFSQFSRLFQPNGQSNDPKILLDFSKNLINEETFKLLMEVAKEANVAKLRDEMFRGGPINTTEKRAVLHVALRNRSNTPIFVDGKDVMPEVNQVLDQMKKLSESVRSGSWKGYTGKEIKSVVNIGIGGSDLGPLMVCEALKPYAHEKLSVHFVSNIDGTHLAETLKKVDPETTLFIIASKTFTTQETITNAQSARQWFLKHAKEEKFVAKHFVALSTNESEVTKFGISVENMFRFWDWVGGRYSLWSAIGLSISIYIGHDKFLELLEGAHLMDLHFQKTEFENNLPVILAMIGILYNNFFGAQTHAILPYDQYMHRFAAYFQQGDMESNGKVTLDDLLNKRYXSTGPILWGEPGTNGQHAFYQLIHQGTKIIPCDFLAPIVSHNPIN…
PF00342	Tadh_Metazoa	LTELPEWKKLQEHYADVASHTHMKALFKEDPSRFNKFSLNLDTGNGKILFDFSKNIVTEETMKLLLDLARACGTEEARKAMFTGEKINITENRAVLHIALRNRSNSPIYVDGKNVMEDVNRVLNHMKEFTEYVRSGRWKGYTGEAITDVVNIGIGGSDLGPVMATEALKPFGDGPRVHFVSNVDGTHLAMKLANLDPAKTLFVIASKTFTTQETITNANSAKAWLLNVAKDEAAIAKHFVALSTNKVSVEKFGIDSSNMFEFWDWVGGRYSMWSAIGLSIALNIGMKNFEDFLAGAHAIDKHFTTAPLHQNVPVIMAVLGIWYNNFFNAQSHGILPYDQYMHRFAAYFQQGDMESNGKGVDRNSNRINNYSTGPIVWGEPGTNGQHAFYQLIHQGTKLI…
PF00342	Sarc_IchthyosporeaIchthyophonida	PNMNSINPTTTPAWGRLQDLAKEYKNLQISSLFEERERFERYSIQLDDILVDYSKNRVNDAILKALCDLARETELHIAIEDMFKGEAINQTEGRAVLHTALRNKSDHTVTVDGKNVIEDVNRVLGQMKTFADKIQNGEWLGFTGKPIKSLVNIGIGGSDLGPVMVTEALKPYKHPEIECYFVSNVDGTHIAETLKKVNAETVLFLVASKTFTTQETMTNAQSAKEWFLGQVGGNVEHVAKHFAALSTNAKDVEAFGINPKNMFGFWDWVGGRYSLWSAIGTPIALSIGFDNFVELLAGAHEMDNHFKTAPLEKNIPVIQALIGIWYNNFFGAETYAILPYDQYMHRFAAYFQQGDMESNGKFVSRDGNEVDYSTGPIAWGEPGTNGQHAFYQLIHQGTK…
PF00342	Crev_FungiZyg	YKQLQDYYNGPGKDIDMRQLFKEDGKRFSKYSRTLQLQSLDGKHSTELLVDFSKNRVDDKTFQLLLELAKEAKLEEYREKMFTGEHINVTEDRAVLHVALRNVSNTPIYEDGKDVMPEVNAVLNHMREFSEAVRSGVWKGYTGERITDIVNIGIGGSDLGPVMVTEALKKYSQPGLNVHFVSNVDGTHLAEAVKDLDPARTLFIVASKTFTTQETLTNAHSAKDWFLATAKDKAYVAKHFVALSTNAEGVSEFGIDTDNMFQFWDWVGGRYSLWSAIGLSIAIYVGFDNFHALLEGGHAMDRHFRTAPLEDNLPVLLGLIGIWYNNFFGAETQALLPYDQYLHRFSAYFQQGDMESNGKFISRDSREVNYQTGPIIWGEPGTNGQHAFYQLIHQGTKLI…
PF00342	Hmag_Metazoa	LTERHGWKKLKSHFDEDAKTWHMRDLFQKDPDRFKAFSETLSTPHGEILVDFSKNRITETTLRLLLELVEECQVENMRNQMFSGENINVTENRAVLHIALRNRSNTPIIVDGKDVMTDVNKVLKKMKKFSEDVRSGSWKGYTGESITDVVNIGIGGSDLGPLMVTEALKSFCDGPKAHFVSNIDGTHMAETLKNLNPATTMFIVASKTFTTIETMTNAQSAKSWLLQSSNDESSVAKHFVAVSTNTWVGGRYSLWSAIGLSIILSIGMSNFEQMLEGAHFMDKHFKETEPRHNLPIILGMIGIWYNNFFGSQTHALLPYDQYLHRFAAYFQQGDMESNGKSVTRDGIYVNYNTGPVIWGEPGTNGQHAFYQLIHQGSRLIPCDFILPVESLNPISNGVH…
PF00342	Ddis_Amoebozoa	EFKNLKEHYENIGKNINMRKEFESNYGATRFKDFSKEVNISKQVGTILLDYSKNRINKETMDLLFELARASKVEEMRNSMFQGEKINITEDRAVLHTALRNRDPSAVIKVDGENVIPSVRKVLDKMRSFSERVRSGQWKGYTGKTITDVVNIGIGGSDLGPVMVTQALKNYANDKVMRAHFVSNIDGTHLAETVKHLCPETTLFIVASKTFTTQETITNAQSARSWFLEKIGGSSVSADVQKHAIGQHFVALSTNEQEVTKFGILKENMFEFWDWVGGRYSVWSAIGLSVALYVGMDHFESFLEGAYHMDQHFLNTPLELNLPVIMGLLGVWYNNFFGCQTQAILPYDQYLSRFPAYFQQGDMESNGKSVQRNGERVTHSTGPIIWGEPGTNGQHAFYQ…
PF00342	Ppal_Amoebozoa	WKKLEEHYQKVGKSFNMRNEFGKDQKRFEKFHVELKLNNEVGPILFDYSKNRVNEETMELLFKVAKHANVEQWRDRMFAGEKINITENRAVLHTALRNRDAKSVIKVDGEDVMPGVRAVLAKMKSFVERVRNGKWCGYSGKKITDVVNIGIGGSDLGPVMVCAALKPYANDTELRAHFVSNIDGTHLHETVRQLDPATTLFIVASKTFTTQETITNALSARKWFLDHLPSGVDQGHAIGQHFVALSTNEKEVTKFGILVENMFEFWDWVGGRYSLWSAIGLPIALYVGFDHFEQLLAGAFAMDHHFQSAPLDKNIPVLMALIGLWYNNFFDAQSLAILPYDQYLSRFAAYFQQGDMESNALMKGKSEEEAKAELTKEGLSQERLDKLLPHKVFLGNRPT…
PF00342	Pbif_Breviatea	MKELFSSDKNRFDELSLSVLDDEILIDFSKNIIKEETLTALLDLAKKAGVFDLRDKMFSGEKINITENRSVLHIALRNFSGKPIHVNGEDVMPNVQKVLSQMRQFVDKVRSGAWKGHTGKAITDVVNIGIGGSDLGPVMVTEALKPFARDENGVEKVRAHFVSNVDGTHVSEILRKCNPETTMFIVASKTFTTQETLMNANTAKAWVLKAFNNDQTAIPKHFAALSTNAKGVMAFGIADENRFEFWDWVGGRYSLWSAIGLSIALNIGMDNFEALLKGAHEMDQHFLTAEPRKNAPLILGLLGVWYNNFFDADSHAVLPYDQYLHRFAAYLQQGDMESNGKSVTRDGERVNYSTGPIIWGEPGTNGQHAFYQLVHQGTKLIPCDFIAPVHTHNPVSGGV…
PF00342	Mvib_Filasterea	RNIEDMRTAMFSGEAINITENRAVLHVALRAPRDAEILVEGQNVVPEVHQVLDKMRTFATKVRSGEWTGHTGKQITSVVNIGIGGSDLGPVMVTEALKAYTHDASLKVHFVSNVDGTQIAETLRLLDRETTLFIVASKTFTTQETLTNARTARAWLLNDGAVPDSAVAKQFVALSTNASAVAEFGIDAEQGMFRFWDWVGGRYSLWSAIGLPIVLAIGPDRFDELLRGAHSMDTHFRMTPLADNIPVILALLGVWYNNFWDAQTHALLPYDQYLHRFAAYFQQGDMESNGKSVTRTGDTVHSYSTGPIVWGEPGTNGQHAFYQLIHQGQKLIPCDFIAPVKTHNPLPNNHHDILLANFFAQTEALMVGKTLSEVTSELSAEAVARGVAPHKVFTGNRPS…
PF00342	Mlei_Metazoa	VQLKDLFANDPNRFSKYSQAIEIDELKLLVDFSKNKIDEDIFGELLKLVKDAQVEEMRDKMFKGEPINFTEQRAVLHIALRNRSNNPILVDGQDVTPKVNQVLEKMKIFADNLRNGTWKGVTGKAITDVVNIGIGGSDLGPLMVTEALKSYRGNGPDVHFVSNIDGTHIATVLEKVNFESTLFIIASKTFGTLETLTNARTAREWFIKKSGDPSGVAKHFIALSTNAKLVSEFGIDTANMFEFWDWVGGRYSLWSAIGMSIMCHIGSDNFIKLLEGAHAMDNHFTSAPVEKNIPIILAVLGVWYNNFLGAQTHALLPYDQYMHRFAAYFQQGDMESNGKGVSREGTRVKYSTGPIVWGEPGTNGQHAFYQLIHQGTKLIPCDFIMPVQSLNPIGDHHEI…
PF00342	Clim_Corallochytrea	FLNCSGKMAWQNLRDHHASMKDVHMRDLFEGDASRFDKFSRTLNTDDGAILFDFSKHRATEETMALLIALAKEAGVEDMRNKMFTGEKINITEDRAVLHIALRNRSNDPINVDGKDVMPDVNEVLGRIKDFVGRVRNGEHTGHTGKAITDVVNIGIGGSDLGPVMVTEALKPYAGHITPHFVSNVDGTHMAETLKKVNAETTLFLVASKTFTTQETMMNATTAKQWLVGALGSEDAVAKHFAALSTNHKAVAEFGINTDNMFGFFDWVGGRYSLWSAIGTSIALTIGFDRFEELLAGAHFADRHFATTPLEENVPVLMAMLGVWYRDFFGSETHAILPYDQYMHRFAAYFQQGDMESNGKRVTRDGKVQDIPTGPIVFGEPGTNGQHAFYQLIHQSNTV…
PF00342	Clii_Corallochytrea	HHASMKDVHMRDLFEGDASRFDKFSRTLNTDDGAILFDFSKHRATEETMALLIALAKEAGVEDMRNKMFTGEKINITEDRAVLHIALRNRSNDPINVDGKDVMPDVNEVLGRIKDFVGRVRNGEHTGHTGKAITDVVNIGIGGSDLGPVMVTEALKPYAGHITPHFVSNVDGTHMAETLKKVNAETTLFLVASKTFTTQETMMNATTAKQWLVGALGSEDAVAKHFAALSTNHKAVAEFGINTDNMFGFFDWVGGRYSLWSAIGTSIALTIGFDRFEELLAGAHFADRHFATTPLEENVPVLMAMLGVWYRDFFGSETHAILPYDQYMHRFAAYFQQGDMESNGKRVTRDGKVQDIPTGPIVFGEPGTNGQHAFYQLIHQSNTVIPCDFIAPVKSQNPI…
PF00342	Spom_FungiDik	PAWQAVQTHYESVGKHLVLKELFAKDSSRFEKFSFTFNGLKEEDGPILFDFSKNLITEETVELLVKLAKEANVEGLRDALFAGEHINFTEDRAVFHPALRNVSEKPMKVNGQDVMPGVRKVLRHMKEFSDAVRSGAWKGYTGKPIKSIVNVGIGGSDLGPVMVTEALKPYGQENLELHFVSNIDGTHLAEALKKCDPETTLFLIASKTFTTAETCTNAKSAKDWFLASAKDPSHVAKHFVALSTNEKEVTAFGISAQNMFEFSDWVGGRYSVWSAIGLSVALYIGYENFEAFLSGAHAMDEYFCSTPLEKNIPALAALISIWYSDFFGAQTHLVAPYDQYLHRFPAYLQQLSMESNGKAITRSGDMVNYTTGKILWGEPGTNSQHSFFQLIHQGTKLIP…
PF00342	Cneo_FungiDik	TQYQAWKKLQSLHASKADKLVLKDLFKADPKRFSNLSKTFSSSSPDVSLLLDYSKNLIDDEVLSTLFDLAREAKVESFRDAMFDGKHINTSEGRAVLHIALRNPPADKGGFKISEAGVDEVHAVLAHMKEFSDSVRSGAWKGYTGKPIDTIVNIGIGGSDLGPVMVCEALKHYSKRDLKTHFVSNIDGTDMAEVLKACNRETTLFIVASKTFTTQETITNAESAKEWFLEEAKEKAHVAKHFVALSTNTKGVTEFGIAESNMFQFWDWVGGRYSLWSAIGLSICLSIGFDNFQELLNGAHEMDKHFKTAKLEDNLPVILALVGIWYNDFYGAQTQALLPYDQYLKKFADYFQQGDMESNGKSVTKDGSRVDYETGPIIWGQSGTNGQHAFYQLIHQGTK…
PF00342	Umay_FungiDik	PAWQKLQQLYDTKGKQINLGQAFKADPQRFEKYSREWSSKATDARFLFDYSKNLIDDEVLEQLLALAEQAQVKEQIDAMFSGEHINTSEDRAVLHVALRDVPGDFKINEAGVDEVKPELEHMKAFSEAVRSGAHKGYTGKNIKSIVNIGIGGSDLGPVMVTEALKPYSKRELDAYFVSNIDGTHMAETLRVCDPETTLFIVASKTFTTQETITNATTARDWFLEHAKDKAHVAKHFVALSTNVKAATEFGIAEQNMFKFWDWVGGRYSLWSAIGLSIAIVIGYDNFEQLLLGAHEMDVHFKNTPLKDNLPALMALLGIWYIDFFKHHEILLSNFFAQPEALAFGKSEAEVKQELGAEASNEFLVKSKVFEGDRPTNSILVQKITPAALGALIALYEHKI…
PF00342	Falb_Discicristoidea	RFSLSLDTPEGPFLVDFSKNLVDAEVWQQLGRLAEATKVATTVRRTLGGEAVNRTEGRAALHTALRCRDPAAVVSAAGAGGADDVMPGIRRVLAQMRDFTERVRSGAWRGHSDQTMTDVVNIGIGGSDLGPAMACQALAHYGHSGGLRMHFISNVDPTHLAEVLRLVNPATTLFIIASKTFTTQETLANARAAKAWFLEHSGAGEAAVAKHFVALSTNQRGCQEFGIDPANMFEFWDWVGGRFSMWGAVGLSIALFVGMDHFEQMLXGANFMDRHFLETIDQPSKCVPLVLALLGVWYNNFLDAQTHAILPYDQYLARLPAYLQQXDMESNGKSTNLDGQKVDYSTGSIIWGEPGTNGQHAFFQLIHQGTKLIPCDFLAPAQGINPPFEQHELLLSNFL…
PF00342	Ttra_Apusozoa	LLADFSKHLVTERTVELFGELAAAMDFNALRAAMFAGEHVNVTEDRAVGHVALRTPEAYKCLYDDGASSSFDFAEDGAEAVGTVLAQMKAFADSVRSGTWKGATGKAIASVVNIGIGGSDLGPAMVVGALAPYAKDELDMHFVANVDPSNLTEALAECDRETTLFIVCSKTFTTAETLANANAAKAWLLDPAGGLDDAAVAAHFVAVSTNSDGVAGFGIDPANMFAFSDWVGGRYSVWGPIGLSVMLAVGPEAFGRFLAGAHAVDEHFLTAPLASNIPFLMGTLDLWYTNFFGYTSHAVLPYDHNLGRFAAYLQQLTMESLGKGVTRDGVPLPPHTSGSVVFGEPGTPAQHSFMQLLHQGQVVPADFLVAASSHAAIGTQHEMLVANAVAQAEALMVGK…
PF00490	Ddis_Amoebozoa	NYSHYLHSGYAHPITRSWQGDKVILKSQLIYPIFVTDLINTKTEIKSLPGQYQISSDLVVEFLRPLVEKGLKSIILFGVIISGVKDEQASSADKRESSPVIKSIELIKNEFPEILICTDLCLCAYTDHGHCGVLTEEGFIENEKSIIRLGEIALSFAKAGAHVIAPSDMMDCRVGQIKKVLFQNGYGGRVAVMAYSSKFASSYYGPFRDAAGSGAKHGDRQAYQLPIASRGLGLRAALRDEAEGADFIMVKPAGPYMDIIREVKDHVKVPVCCYQVSGEYAMIYHASVAGGIDLKSGVMESLISLQRSGCDIFITYFTPQLLDWLK
PF00490	Ppal_Amoebozoa	GYANPITRSWQGDSTILKSQLIYPIFVTDQVNTKNEIKSLPGNYQFSVDSVLTEFLEPLVKKGLKTIILFGVLLNNASKDLTGSLATDRDNSPVIKALRLLKKQIPELVIACDVCLCAYTSHGHCGITHDDGSINNQPSIERLAQLSVEFAMAGADIIAPSDMMDCRIGEIKKQLFAAGYGSKVAVMAYSSKFASAFYGPFRDAASSGAKYGDRSAYQLPPPSRSLAVRAAQRDADEGADFLMVKPAGPYMDIIREVKNAINLPMCCYQVSGEFAMLYHSAQAGAFDLKTGVMESLLCLKRAGCDIFITYFTPQLLEWL
PF00490	Mcir_FungiZyg	LHGGYHYALSRSWQAERTLTKEMLMYPMFITDDPEAFDTIDSLPGQYRIGINKLHDFIAPLVKKGLKSVILFGVPLKEGVKDATGTRADDPEGPTILAIQLLRKHFPNLFVACDVCLCEYTSHGHCGVLREDGTLNNDLSIQRIAEVAVNYAKAGAQCVAPSDMMDGRIRAIKEGLMASGYAHKVMLISYSAKFAGSWYGPFRDAANSAPAFGDRRCYQLPANARRLARRAIKRDMEEGADCIMVKPGMPYLDIVREASEIAADYPISVYQVSGEYAMLYQSAKAGVFDLKSIVLESMTGFIRAGATLILTYYTPELLTWL
PF00490	Rory_FungiZyg	PKSILHSGYHYPLTRAWQGERTLTKEMLMYPIFISDDENAFDHIDSLPGQYRIGINKLKEFIAPLYQKGLKSVMLFGVPLKEGVKDPTGSRADDPEGPTILSVRLLRKEFPNLFVGCDVCLCEYTSHGHCGILREDGTLNNALSVQRLQQVAVNYAKAGAQCVAPSDMMDGRIKAIKEGLMEAGLAHKVMLISYAAKFAGPWYGPFRDAANSAPAFGDRKCYQLPTNGRGLARRAIKRDMEEGADCIMVKPGLPYLDIVREAAEIAADYPISVYQVSGEYSMLYHSAKAGVFDLKTIVLESMTSFLRAGATLILTYYTPDLLTWLDEE
PF00490	Rirr_FungiZyg	LSSFLQGGHNHPVSREWHSERTLRKSSLMYPIFITDKPDSESEISSXPGQKRLGINKIEGFLKPLVEKGLSSVLLFGVPTCEKDPLGSGADDPNGPVILAVKLIRSKFPQLFIACDVCLCEYTSHGHCGHLNEDGTINNEASVKRIAEVAINYAKAGAHCVAPSDMMDGRIGAIKNLIIQEGLTNKVNLMSYSAKFSTNFYGPFRDAANSAPAFGDRKCYQLPPNARGLARRAIRRDLTEGADIIMVKPGMPYLDILRDAKEISSDVPIAVYQVSGEFAMIWRSAEAKVFDLRAVVFESMEGFLRAGANLIITYYTPQLLEWLE
PF00490	Cneo_FungiDik	LQISSVLHGGIHHPTLRTWQANGRNLTKSMLIYPIFISDDPDAEQEVATLPGQKRWGINKLEAFLKPLVEKGLKSVILFGVPVTMEKDPRGSAADDESTPVIQALKLLTSVFPQLMLCVDVCLCEYTSHGHCGILSSLPNPAHSNAPTLDAEASAQRIAEVAVAYAKAGAHCVAPSDMMDGRIRAIKYGLMQVGLANRCALMSYSAKFASGLYGPFRDAAGSAPSFGNRKCYQLPPNARSLARRAIQRDASEGADILMVKPALPYLDIISDCAQYAPDHPTACYQVSGEYAMVVAGAEKGIYGLREMAFETTESMVRAGASIILTYFTPQFLDWL
PF00490	Umay_FungiDik	QAHSILHSGYQHPVTRAWQNQGRNITKSMFMYPIFVTDDADAEVPLASMPGQCRWGVNKLEGFLAPLVKKGLSSVILFGVPLKTPKDAQGTLADDPNGPVMQAIKALRKAFPSLYIATDVCLCEYTSHGHCGILYEDGTINNQPSVERLAEVAVNYAKAGAHCVAPSDMMDGRVRAIKKGLIDAGFGNKVTLMAYSAKFASSLYGPFRDAVDSAPSFGDRRCYQLPPTARGLARRAIVRDASEGADVLMVKPTLPYLDIVAEARDLAPDHPLACYQVSGEFAMIHAGAKAGVYELRRMAEESVQSMVRAGANIILSYFTPEFLEHK
PF00490	Crev_FungiZyg	VEIDSLLHSGYHHPAQRPWQVERMLTKSTLMYPIFVTHEKDSMTPISSMPNQCRIGVNRLEEFVGPLVAKGLQSVMLFGVPDDFVKDAFGTAADDPNGPVIQATRLLKSRFPELLVACDVCLCEYTSHGHCGHLNPDNTIDNKASVRRLAEVAVNYAKAGADCVAPSDMMDGRMRAIKQGLIDAGISHRVSLMAYSAKFASVLYGPFRDAACSGAQFGDRSAYQLPPPSRGLARRAIERDVREGADMIMVKPAGFYMDIIRDAKDLAPNHPIAAYQVSGEYATIHHAAAAGVYELKPAVLESMTGFLRAGCNIVITYFTPELLDWL
PF00490	Nspp_Discicristoidea	VQSRLHAGYGHPVQRAWQSPRPLTADTLMYPVFVSDRTAAVDPILSMPGQSRWSVDKLPALLGPLVAKGLRSVLIFGVPESCPKDMRGSPADAADGPTVRAVRLIREQYPDVLVACDVCLCAFTSHGHCGILHEDGTVNNAASIDRLAEVALNYARAGAHIVAPSDMMDGRVHAIKRQLIAHGLAGKVAVMSYSAKFASCFYGPFRDAAKSAPSFGDRKCYQLPPGARGLAHRAIQRDLAEGADYVMVKPGGPYLDVIRDAVELAGGVPVAVYQVSGEFAMLTHGAAHNAFDYKLAVMESLTGFLRAGATVVITYFTPQVLEWIVE
PF00490	Bden_FungiChy	QVSSLLHSGYHHPTLRSWQQSTGGISFITKESLVFPIFIHDKPDVKEAIPTLPGQFRRFGVNTLKDHFDPLIKKGLASIIIFGVPTSIEKDGRGSAADDENGPVIQAIKLFRKHFPSVLVCCDLCLCAYTSHGHCGILHSNGSIDNQLSIDRLAQVALNYAKAGCQVIAPSDMMDGRIRAIKHILLLNQLGSSVSVMSYSAKFASVFYGPFRDAACSAPSAGDRKSYQLPPGARGLARRALSRDASEGADMIMVKPGYPYLDIVRDAKELVPDLPLAIYQVSGEYAMLWHAAQHNVFDLKAGVMESLESAMRAGANILITYYTPMILDWLSE
PF00490	Spun_FungiChy	SLLHSGYSHPTLRVWQSCEGRTLTKSSLIFPIFIHDKPDVKEEIATLPGQYRFGVNTLKEHFGPLVENGLKTVLIFGVPTLAQKDERGSCADDPKGPVIEAIRFFRKEFPSILVACDLCLCEFTSHGHCGILNEDGTINNQPSIERLAEVALSYARAGCQIIAPSDMMDGRIRSIKKILLDNGLGAKVAVMAYSAKFASVFYGPFRDAAGSAPSHGDRKCYQLPPGARGLARRALIRDAGEGADIIMVKPGYPYLDIVRDAKELLPDLPLAIYQVSGEYAMLWHAAQNGVFELRAGVMESLQAALRAGANILITYYTPLLLDWLED
PF00490	Gpro_FungiChy	SLLHSGYFHPVMRAYQQAPKLTKENLMYPVFVHDKDDAVDEIATLPEQKRWGVNRLKELINPLVAKGLKSLLIFGVPTMAVKDDYGTSATDPASPVIRALTLVREAFPELLLAVDLCLCAYTSHGHCGILEADGTIENTKSCKRLAEVALAYAKAGAQVIAPSDMMDGRVKAIKDILFENGFSGKCSVMSYSAKFASCFYGPFRDAADSAPAFGDRRCYQLPPGARGLARRAVIRDVEEGADIIMVKPGTPYLDIIRDSHDVAPDLPLAVYHVSGEYAMIWHAAQHQVFDLRRGVEEVMDGFLRAGANIIITYYTPRLLEWLSD
PF00490	Adig_Metazoa	LHGGYNHSATRAWQSTNTEITSKNLIYPLFISDHDDAYEEISSLPGQYRMGVNNIEKIVSPLVKNGLKSVLLFGVVTKLQKSENGHNADSDLSPAILATNKLRTLFPELLICCDVCLCPYTSHGHCGILNKDGSINNVESIKRLAEVSLAYAKAGCHVIAPSDMMDNRVGAIKDILHQNGFGGKVAVMSYSAKFASSFYGPFRDAAMSAPAFGDRRCYQLPPGAKGLAARAVERDVKEGADMVMVKPGMAYLDIVRQTKDKFPDLPLAIYQVSGEYAMLYHGSKAGAFDLKTIVLESLTAMRRAGADIIITYYVPSLLDWLKE
PF00490	Bflo_Metazoa	ILRENGTINNEASTQRLAEVALAYAQAGCQIIAPSDMMDGRIAAIKESLRSHGLGNSVSVLSYSAKFASSFYGPFRDAAKSAPAFGDRKCYQLPPGSRGLAIRAVERDVREGADMLMVKPGMAYLDIVRDTKNKFPNHPLAIYQVSGEYAMLYHGAQAGAFDLKTIVMEVLTGMRRAGADIIITYYTPLLLDWLQEQ
PF00490	Skow_Metazoa	SILHSGYFHSVLRSWQSSETSFDSSNLIYPLFITDEANAIEPIGSLPEQSRYGVERLEETLRPLVKKGLKSVLLFGVPSKLPKDERGSHADSDDTPVIFAIKKLRSQFPDLLIICDVCLCPYTSHGHCGILYEDGTINNTASIQRLAEVSLAYAKAGCQVIAPSDMMDGRIAAIKQILLANDLGSKVSVLSYSAKFASSFYGPFRDAAKSAPSFGDRRCYQLPPGSRGLASRAVDRDVSEGADFLMVKPGMPYLDIVRQTKDKYPSIPLAIYQVSGEYAMLYHGWTAGALDLKKAVMESMISMRRAGADIIITYYTPRLLDWLQEQ
PF00490	Xtro_Metazoa	MQVSSILHSGYFHPVLRAWQCSATSLDANNLSFPIFITDNPDAIEDIPSLPGQARYGVNQLEGLLRPLVDNGLKCVLIFGVPSKVIKDERGSAADTPDTPAILAIQRIREKFPQLLIACDVCLCPYTSHGHCGILREDGSLQNESSCQRLAEVALAYARAGCHIVAPSDMMDGRIGAIKQALVSNDLGNKVSVMSYSAKFASCFYGPFRDAAQSKPAFGDRKCYQLPPGARGLAIRAVDRDVREGADMLMVKPGMPYLDLVREVKEKHPALPLAVYHVSGEYAMLWHGAQANAFDLKVAVLEAMTGFRRAGADIIITYYTPQLLQWIKE
PF00490	Cowc_Filasterea	LHSGYFHPTLRSWQSNAAHLAASQLIYPLFISDVEDNWEEIGSLPGQFRFGLAHIDRVVAPLVAKGLRTVLLFGVPVQVPKDATGSLADADDSCVARAVRHLRKTYPSLLVACDVCLCPYTSHGHCGILYDDGTINNQASTERLAQVALSYARAGCQIIAPSDMMDGRIASIKTALRGAHLHSKVSVMSYSAKFASCFYGPFRDAAKSAPAAGDRKCYQLPPGARGLALRATDRDVAEGADMLMVKPGGPYLDIVRDVKNKYPDVPLAIYHVSGEFAMLWHAAKAGAFDLRAAVLETVRGMRRAGADIIITYYTPQLLDWLQDE
PF00490	Ctel_Metazoa	MAGHAVLHSGYCHPALRKWQTTNTTITPANLMFPVFITDEDDAIEQIDSLPGQARYGVNKLVDMLKPIVANGLESVLLFGVPQKLPKDGRGTQADTPETPVIRAIKLLKEAFPSLLIVCDVCICPYTDHGHCGILFEDGTINNEPSIKRLGEVALAYAKAGCHVVAPSDMMDGRIGAIREALVSANLHSKVSIMSYSAKFASGFYGPFRDAAKSAPSFGDRQCYQLPAGSSGLAARAVDRDVAEGADMLMVKPGMAYLDIVRQTKDKYPDLPLAIYQVSGEYAMLWHGAKAGAFELKRILTETLVSMRRAGSDIIISYYTPMVLEWMGKE
PF00490	Lgig_Metazoa	MSEQTILHSGYFHPVLRSWQTSNTSIQPEHLIYPIFITNDPDALEEIPSLPGQSRYGINTLFDALEPLVKKGLKTVLLFGVLSKTEKDSRGSPADSVSNPVVEALPKIRKWFPNLLIACDVCICPYSSHGHCGILKEDGYIDNEASINRLAEISVAYAKAGCHIIAPSDVMDGRVGRIKTALRSHGIQNHVSVMSYSAKFASNFYGPFREAAKSAPAFGDRKNYQLPPGSIGLAERAVDRDVAEGADMLMIKPGMPYLDVVRMAKQKYPNHPLAIYHVSGEYAMLYHGAKAGAFKLQDIVLESLQSMRRAGADIIITYFVPQLLDWLCE
PF00490	Aque_Metazoa	AALHSGYSHPVLRVWQSNAGTAPVTDYFIYPLFITDDPDGKEEIASLPEQYRWGVNKLQDALDELVKEGLRAVLLFGVPQKIEKDGTGSSADCSDNPVILAVKRLRELYPSLLISCDVCLCPYTDHGHCGILTNTGSLDNPKSIKRLAEIAVAYGKAGAHVVAPSDMMDNRVRAIKQGLELNGLSTSVAVMSYSAKFASSFYGPFRDAAKSAPAFGDRRCYQLPPSARGLAKRAVDRDIEEGADIIMVKPGMPYLDIVRDTKEKHPEFPLAIYQVSGEYAMLWHGSTAGAFNLKIIVMESIESMRRAGADIIISYYTPKLLKWYK
PF00490	Colp12	IHSGFHHPTLRQWQATQTVLQAHNFVYPIFISDDPDYKVELKALPGQYRFGVNHLESIVGPLVRKGLKCVLIFGVPEKALKDNRGTPADDPEGPVIVAVKKLRTLYPDLLIACDVCLCAYTHHGHCGLLCEDNTIENESSILRIAEVAASYAKAGAHIIAPSDMMDGRIGAIKDALFAAGLGSKVTLMSYAAKFASCFYGPFREAAKSAPIGDRRCYQLPPGARGLAVRAVERDVDEGADILMVKPGMPYLDIVRDIKEAYPHLPMAIYQVSGEYAMLWHGAANGAFDLKTAVIESLHCMRRAGCDIIITYYTPQLLDW
PF00490	Tadh_Metazoa	MLHSRFHHHVLRDWNSSNTDITPSNLIYPIFVSDDPECNEEITSLPEQRRFGVNKIDHVLNDIVAQGLQSVIVFGILSRNESKDALGTNADSSLSPTIQAIKKLRELYPNLLIICDVCLCPFTDHGHCGILDKDGYIKNEASIQRLAKIACSYAKAGCHVVAPSDMMDGRVNAIKESLIKQGFGNRVSVLSYSAKFASCFYGPFRDAANSAPAFGDRRRYQLPMGSRSLALRAINRDIDEGADIVMVKPGMPYLDIVRDTKDKHPDIPVAVYQVSGEYAMLYYASKEGAFTLQSVVMESLRSMRRAGADIIITYFVPKVLAWLRE
PF00490	Apar_IchthyosporeaIchthyophonida	PLLRQWQESNVAVTPANLMYPVFLIDEADKKEEIKSMPGQYRLGINQIVDFLRPIVANGLKSIILFGVVAEDKKDERASHADTPDNPVVAGIPIIRKAFPDLLIACDVCLCPYTSHGHCGVLTEDGHVDNAPSIARCAEIACNYARAGCHIVAPSDMMDSRVGAIRQYLKNASLDGKVSILSYSAKFASKFYGPFRDAAKSAPAFGDRKAYQLPPGARGLAMRAVARDIEEGADMVMVKPGMPYLDIIREVKDKFPQVPLSVYHVSGEYAMIYHAAAAGAFELKDAVMEAMMAFRRAGCDCILTYYTPVILEWIKK
PF00490	Dpul_Metazoa	ILHSGYSHATLRAWQTSDTTIKPNNLMYPLFIVDDPEAEQEISGMPGIYRFGVNRLENHLKSAVAAGLSSVLLFGVPFSMPKDEFGSAADHPENPVILAIQKLRQLFPDLLIACDVCICAYTIHGHCGILCDDGTIDNAASVARLAKQALAYAKSGAHVVAPSDMMDGRVGVIKKILQENGLASRVSVLSYAVKFSSCFYGPFRDAAKSAPAFGDRRAYQLPAGSKGLAMRAAERDVAEGADFLMVKPGLAYLDLVRQVKDKFPNHPMFIYQVSGEYAMLYHGDKAGAFNLDNMLMEILCCMRRSGADVIISYFTPRILELL
PF00490	Sdes_IchthyosporeaDermocystida	LHAGFHHELLRTWQSPSTSISPRNLMYPIFVSDDPDENLDIQGLPGQKRVGLSHLEDMVRPLVELGLCSVLVFGIPSFIEKDETGSGADRETSPTIQAVKLLRKTFPSLLVACDVCLCAFTNSGHCGILLPDGTIDNKSSIERIAEVAFAYAQAGAHVVAPSDMMDGRIGAVKQRLLNSPYSGIVSVMAYSAKFASAFYGPFRNAAKCAPIFGNRKCYQLPPGARGLAHKALNRDVNEGADIIMVKPAMLYLDILRDAKNTYPHHPLAAYHVSGEYSMLYYAAEANAIDLKLCVLETMTCFRRAGCEIIITYFTPRILKWLEK
PF00490	Nk52_Ichthyosporea	LHAAYSHELLRRWHSENCDIDPAHLMFPVFVSDDPEENFEIKSLPGQKRVGMNHLESYLAPVVKNGLRSVIIFGVPVKTEKDSIASFADADDCPTVLAVRFIRKKFPQLLVACDVCMCPFSSHGHCGVLFEDGTINNPESIKRLADIAFKYAEAGAHVVAPSDMMDGRCAAIKQRLLASELAGKVALMSYSAKFASAFYGPFRDAAQSAPSFGDRRCYQLPAGARGLAMKAAKRDVEDGADILMVKPGMPYLDVCRDVKNAHPTTPLAVYHVSGEYAMLWHAAQAGGLNLKSAVMESMTAFRRAGCEIIISYYTPQILQWLAE
PF00490	Cfra_IchthyosporeaIchthyophonida	TRLEVNMNFETHRLGSGFHTDTLRSWQSTESKLTKDQLIYPLFLSDEPDQLWEIPSLPNQFRIGANKLIQHVAPFVKKGLKSVILFGVVDSSKKDDWGTYADDAANPVMLAIPVLRKTFPDLLVIVDVCLCPYSSTGHCGVFKEDGAIDNAPSIQRLADISVNYAKAGAQVVAPSDMLDNRIGAIRQSLKEANLDGQVSIMSYSAKFASAFYGPFREAAASAPSFGDRRNHQLPPGSRSLAIRAGMRDAIEGADMLMVKPGGPYLDIIRELKDKCPQLPMCVYQVSGEYALMWHGAAAGAIDLKKGVLESMTSFRRAGCDCIITYYTPLILDWLDE
PF00490	Sarc_IchthyosporeaIchthyophonida	MAYQTHRLQSGFHTDVLRGWQSTESKVTKDNLIYPLFISDEPDQLWEIPALPKQFRIGVNQLLDFVAPLVKKGLKSVILFGVVNQSKKDALGTCADDATNPVVLALPMLRKAFPDLLLVVDVCLCPYSDTGHCGVFKADGALDNGPSTQRIAEIAINYAKAGAQVVAPSDMLDNRIDAIRGGLRDANLDGQVSIMSYSAKFASAFYGPFRAAAGSAPSFGDRRNYQLPPGARGLAIRAGDRDVVEGADMLMVKPGGPYLDIIRELKDKYPQLPMCVYQVSGEYALMWHGAAAGAIDLKRGVLETMTSFRRAGCDCIITYYTPMLLDWLDE
PF00490	Mvib_Filasterea	SMALHSAIHHPQLRTWHSLESTVTADNLLYPIFVSDVADENVEISSLPDQRRFGVNHIESVLAPLVALGLKAVLVFGVTEKSELKDACGTYASADNNPAVEAVRVIRRVFPSLLVACDVCLCPYTNHGHCGILEEDGTINNAASIARLAEIARVYAEAGAHIVAPSDMMDGRIAAIRALIPTKVSILSYSAKFASAFYGPFRDAVKSAPAFGDRRCYQLPIGARGLAMRAVERDVAEGADMVMVKPGGPYLDIVRDVKERYPSHPVAVYQVSGEYATLHAAARASILPLRAAAMESLTALRRAGADILITYFVPQVLKWLAE
PF00490	Nvec_Metazoa	AALKSGFQHAVTRQWQSTNTSLTPHNLIYPLFISDDPDGLEHIASLPGQARVGINNLEKVVKPLVDKGLSSVLVFGVISKLEKDGNASNADSDLCPTILGIKKLHSLFPDLLIICDVCLCPFTDHGHCEVMFTGNKIYSSESCDRTANVSKFSAFVGCHVVAPSDMMDNRVAAIKQIMAANGYGSKVAVLSYSAKFASSFYGPFRDAAKSAPAFGDRRCYQLPPGARGLAMRAVDRDVQEGADMLMVKPGMPYLDIVRDTKNKYPDLPLAIYQVGADIIITYFVPQLLDWLQE
PF00490	Mver_FungiZyg	TSLLHAGYHHPLHRTWQAGLPITSEMLMYPIFVTDNDNVEEKIDTLPGQSRWGINLLVDFLTPLVANGLKSVIIFGVPANIEKDAVGSAADDPNTPAIRALKVLSKAFPSLLLACDRLADISLAYARAGCQMISPSDMMDGRIKAIKDALVEEGIAHKVSLMSYSAKFASGFYGPFRDACHSTPGSGDRKCYQLPPQARGLARRALVRDMGEGADVLMVKPGTPYLDILRDAREIAPDYPLSVYQVSGEYAMIWHAAKAGVFDLRTGVMESMDGFVRAGANFVLTYYTPQILEWLKE
PF00490	Amac_FungiBla	LHPANQHPTLRAWNSEPRVRAEHLVYPVFVTDVPDAIEPIASLPGIARYGVKTLVKHLAPLVAKGLQCVLLFGVPSAIPKDNAGSAALDAKTPVVLALQALSKTFPNLLLAVDVCLCAYTDHGHCGLLGQDGRLDNDASIAQLGRVAVHYAQAGAHIVAPSDMMDNRVHAIKDALRAASLPYVSVMAYSAKFASVFYGPFRDAAKSAPGKGDRKCYQLPPGSRKLARRAIMRDVAEGADMIMVKPGYPYLDVVRDAAELAPDLPIAIYQVSGEYAMLYHGAAAGAYALEDAVFESLESGLRAGATILITYYTPQVLDWIQ
PF00490	Cang_FungiBla	LHPSNQHPTLRAWTQSHPQLSAAALMYPVFVTDDPNPDAVEPIPTLPGQSRFAAPNALIAHLTPLVALGLQSVILFGVPSRIPKDNHGSAALDPNTPVVLALRALRKHFPQLLLAVDVCLCPYTDHGHCGILTNYDTQALDNDASIAQLANIAVHYAQAGAHIIAPSDMMDNRILAIKRALNNHKLSNVAVMAYSAKFASVFYGPFRDAAKSAPGMGDRKCYQLPPGSRKLARRAIVRDVAEGADMIMVKPGYPYLDVVRDAADLAPDVPVAIYQVSGEYAMLWHGAQAGVYQLKDAVKESLEAGLRAGATILITYYTPMVLQWLKE
PF00490	Clim_Corallochytrea	LEHPHRLHGGYQTPVSRLWQGPSVKTLNPHNLMWPIFITDDSNGMEEIKSLTGQYRVGVNKIVEYLRPHVENGLQSIMLFGVPGNNVKDATGSSAGQNEGLVVPAIKAIVKAYPDLFISCDVCLCAYTDHGHCGIFQFDGSIDNPASIHRLAEISLAYAKAGAHMVAPSDMMDGRILAIKDALAANGLDGKCMVLSYAAKFASAFYGPFRDAAKSAPGKGDRSGYQLPPGGRGLALRALDRDAEQGADMLMVKPGMPYLDVCRDAKERHPELPLAVYQVSGEFMMIHHAANAGGLALRPTVEETLVSFQRAGVDLIITYFTPQLLQW
PF00490	Clii_Corallochytrea	LHGGYQTPVSRLWQGPSVKTLNPHNLMWPIFITDDRNGMEEIKSLTGQYRVGVNKIVEYLRPHVENGLQSIMLFGVPGNNVKDATGSSAGQNEGLVVPAIKAIVKAYPDLFISCDVCLCAYTDHGHCGIFQFDGSIDNPASIHRLAEISLAYAKAGAHMVAPSDMMDGRILAIKDALAANGLDGKCMVLSYAAKFASAFYGPFRDAAKSAPGKGDRSGYQLPPGGRGLALRALDRDAEQGADMLMVKPGMPYLDVCRDAKERHPELPLAVYQVSGEFMMIHHAANAGGLALRPTV
PF00490	Hmag_Metazoa	ILQGGYFNNTLRSWQSNTSGLTAASLIYPIFIRVGKNKVVDYLKPLIENGLKTVLLFGMVKEDHKNEKGDAIYIEDYNPVINVIKLLKETFHGLLIACDVCLCAYTDHGHCGVLDNKAAIDNKASVNAIALASLIYATAGCHIIAPSDMMDGRIYKIDQLLKENSLRNKVTIMSYSAKFASCFYGPFRDAAASAPAFGDRRCYQLPPQSSGLANRSVSRDVSEGADILMVKPGMAYLDVVKEIKNKYPDYPVAVYQVSGEYAMLYHASQQGAFDIKQAVIESLHCMMRAGATVLISYFTPQVLKWLKE
PF00490	Mbre_ChoanoflagellataCraspedida	LQGGYHNPTLRAWHATSAQLAKEHLMYPVFVSDHENSDHVEAIGSLPEQNRYGYNAVVKALEPLVQKGLASVLLFGVVDRKDVRGATADDSDNPVVKVLPLLKAAFPQLTVACDVCLCPYTDHGHCGIFMDTQPENESQQRFDPVASAKRIAEIAVAYAEAGCDIVAPSDMMDGRIQAIDAGLKAKGLRNRVAIMSYSAKFCSCFYGPFRDAAKSAPKTAPRHNYQLPPGSSGLAARANEISVREGADMLMVKPGIAYLDVLRDTKRLHPYHPLAVYQVSGEYAMLWHGAAQGAVDLREGVLESMTAFRRAGADIIITYYAPRLLQWLDE
PF00490	Ccor_FungiZyg	SHILHSAIHHPLLREWHQTQHLRKNNLVYPIFVTDIPDLQEPITTLPDQYRWGINKLKGFLEPLVNKGLKSVMIFGVPKNIVKDATGSTADDPNGPVIQSIKLIKENFPNVLITCDLCLCAYTSSGHCGITHEDGSLNSPDSCERLAEVALNYVKAGCQVLSPSDMMDGRVAAIKKKLFDNNLVHKCSIMTMSSKYASSFYGPFRDAVQTSSEFGNRKCYQLPPPSRMLGKRAILRDYHEGSDIILVKPMLAYLDMIREASDSAPVPIATYQVSGEYSMLWHSAAAGVFDLKDAVIESLNSAMRAGATILVTYYTPKLLDWIDE
PF00490	Ttra_Apusozoa	LRTGLHHPVLRTWQSEAEVTLADIVYPIFLTAPRDAKEEIAAMPGQFRLGVDVVVDHLAPLVAGGLRALLLFGVDACAKKDGTASYADAADNPVMEALPLLRNAFPDVLLITDVCMCPYTDHGHCGIIENEYVCNDASVARLAEIGVSYARAGAHVLAPSDMMDGRIGALKDACIAAGLEQVSVMSYSAKFASAFYGPFRSAAKSAPSFGDRRTHQLPLGAKRIANRALVRDIREGADILMVKPAMPYMDLIQDAAAQSSLPVACYQVSGEFAMIYHAAAAGALDLKAGVLESLTCLKRAGATILITYFAPQLVEWL
PF00490	Falb_Discicristoidea	QFGLDSLIFPLFVTEVPGAREPISSLPGQFRXGPGEIEAYLAPLVELGLRSVLLFGVITDASTLPKDDTGSAADLAAGPVRTAIRIIRERFPSLLIACDLCLCGYTGHGHCGLPSPADAADCHAPGASGLDHRLSIQRLGDIALLATHTGAHVIAPSDMQDGRIAAIKHALAHRNLQNRVSVMSYSAKFASCFYGPFRAAANSAPGSGDRSCYQLPAGARGLASRAISRDVAEGADFIMVKPGMPYLDIVRDAANQYPNVPVAIYQVSGEYAMLYHAAQHGALQLRAAVQESLEGAVRAGSRILITYYTPHLLHW
PF00490	Rall_FungiCry	IHQTISHHALLKWYSPSTKLIERLIYPVFVSTEENCYEDLMYLPGQKRIGTKRLYNHLKPLVDGGLQSIILFISSDSIHKDEEGSFADDSVNPVIKAIGLLKEWFPRLLIACDVCVCAYTSHGHCGLTLANGNIDNSRSIKRLADIALAYAQAGCDVVAPSDMMDNRVMAIKEILRANSLSSTVSILSYAAKFHSSLYTPFRKVSSSSPLYGDRSKYQLPFESHSVAMKRDIEEGADFIIVKPGLFYLDIVCKAKELFPFTPVAVYQVSGEYAAIYHASKAGILDLDQTIHEYLSGCIRAGASMIITYFVPQII
PF00490	Pbif_Breviatea	GLNSIILFGIPDVKDSVGSECLCDESIIARTIKAIKAKFPDMFIVTDLCFCEYTDHGHCGILDPKTGTVDNDKTLEISAQQAVVHAKAGADMIAPSGMMDGADILMVKPALSFMDVIRDIRNNSNLPVCAYNVSGEYAMLKHAGAAGLVDYERVMMETLTSFKRAGADLIITYHAKE
PF00709	Acas_Amoebozoa	QVIAIMGAQWGDEGKGKLVDVLGADYDIIARCAGGSNAGHTVIVEGKKFAFHLMPSGILHESVICVLGNGVVIHVPTFFDEVKSLEDQGIPYTGRLDGKLEDEAKRGTKDLSIGTTKKGIGPCYTAKIARMGIRVGDLAFPAKFEEKLTALVNYYKRIFPDMAPVDIPKEVAKYTQDYYGRIKPLIVDTVHYLSQAIKTGKRVMVEGANATMLDIDFGTYPYVTSSNASIGGACTGLGLAPTKIGATVGIIKAYTTRVGAGPFPTELNDDLGEKLRAEGHEFGTTTGRPRRCGWLDIVAMQYAQAINDFTSLNLTKLDVLSSFDEVKLGVAYKVDGEVLPFFPASLEVLGKVEVVYETYPGWKCDITKAKSFEELPKEAQTYVRRIEELLECPIAWIGV…
PF00709	Ddis_Amoebozoa	MASIIIGSQWGDEGKGKLVDILSQQFDVVARCQGGANAGHTIVVDGKKIALHLIPSGILNEKASCILGNGMVIHLPTFFKEVQGLQDKGINYKGRLFVSDRAHLVFDLHQMIDAMKEAELSNGTSNDSIGTTKRGIGPCYSSKASRGGLRVCDLYSPEHFRKTFTRLVENKHKRFGSFEYDVEAELKRYQEFAEMLKPFVIDSVYYLNQAFKDGKKVLIEGAQSTMLDLDFGCYPYVTSSASSVGGACTGLGISPNKVVTQIGVVKAYTTKVGSGPFPTEQNDHVGDSLRKAGSEFGTTTGRPRRIGWLDAVVLRYTSMINDFTRLNLTKLDVLSDFEEIKIGVDYKYKGETIKSFPASLETLAQCEVVYESFPGWKCDLSHVTEYDQLPIQAKNYIKR…
PF00709	Ppal_Amoebozoa	SIIIGSQWGDEGKGKLVDILSQEFDVVARCQGGANAGHTIVVDGKKIALHLIPSGILNERATCILGNGLVIHLPTFFKEVEGLKAKGIKYENRLFISDRAHLVMDVHQIVDAMKEQELQNGSSNDSIGTTKKGIGPAYSSKASRGGLRVCDLFHFEQFKKNYARLVENKKKRFGNFEYDMEEEFKRYEKFAEMIKPFVVDTVYFINNAFKEGKKVLIEGAQSTMLDLDFGTYPYVTSSASSVGGACTGLGIAPNKIVNQIGVVKAYTTRVGAGPFPTELHGDEAEALRKEGGEYGTTTGRPRRIGWLDIVVLRYTGLINDFTELNLTKLDVLSNTDEIKIGVDYKYNGEIIKSFPSSLEVLSQCEVVYETFKGWKTSLAHCKTYEELPSEAKTYISRIE…
PF00709	Ppol_Amoebozoa	TVIVGSQWGDEGKGKLVDLLSANYDVVARCQGGANAGHTIVVDGNKIALHLIPSGILNPSATCILGNGMVDGLKEQELTAGRGSIGTTKKGIGPTYSSKASRSGLRVGDLEYFDSFKETFLQLVKNKHKRFGNFEYDTDTEIARYMQYREDLRPFILDTVYFINKAHSEGKKILIEGAQSTMLDLDFGTYPYVTSSSSSAGGASTGLGLAPTKIRSAIGVVKAYTTRVGAGPFPTELDTELAEVIRKEGGEYGTTTGRPRRVGWLDTVVLRYTNTINNFNWLNLTKLDVLSKLKELKIGVAYIHNGKALDSFPSNLHVLAECTVQYETFPGWNTDISHCTSFADLPAEAKTYIQRIEELVGSPIRWIGVGADRKAMI
PF00709	Spom_FungiDik	ITVVLGSQWGDEGKGKLVDILCDNVDVCARCQGGNNAGHTIVANGVTYDFHILPSGLVNPKCQNLIGSGVVVYLPAFFSELEKLEQKGLKCRDRIFISDRAHLVFDYHQRADALNEAELGKQSIGTTGKGIGPAYSTKATRSGIRVHHLYHWAEFEARYRKNVADLQKRYGAFEYDVEAELIRYKELAQRLKPFVIDAVAFMYEALQSKKRILVEGANALMLDLDFGTYPFVTSSNTTVGGVCTGLGVPPQRIANSIGVVKAYTTRVGAGPFPTEQLNEIGDHLQSVGREVGVTTGRKRRCGWLDLVVVKYSTMINGYTSLNLTKLDILDALDEIKVAVAYIINGKRIETFPADLDSLEEAEIVYETFPGWKVPTTGITHWDQMPENAKKYIEFIEKFV…
PF00709	Amac_FungiBla	NGATVVLGAQWGDEGKGKLVDVLAQDADVVARCQGGNNAGHTIVVDGKKFDFHMLPSGLINPKCVSVIGNGVVVHLPSLFQELETTESKGISCAGRLLVSDRAHLVFDVHQVVDGLREMERGGSNIGTTRRGIGPAYSSKASRSGLRVHHLYHPEAFEEAMRKFVANRKKRYGEFAYDVDAEVKRYREFAAKLKPMVVDTIPYLNQALNDKKRVLVEGANAAMLDIDFGTYPYVTSSNTTVGGVCTGLGIAPTRLGKVIGVVKAYTTRVGGGPFPTEQLNAVGEHLQTVGAEFGVTTGRKRRCGWLDMVVLRHSHALNGYTCTNLTKLDVLDQLPEIKIGVRYRHTKSGQIVDHFPADLDFLAECDVEYETLPGWMTDISKVRHWNDLPKNAQTYVRRI…
PF00709	Cang_FungiBla	SSAPTSATRPGVSVVLGAQWGDEGKGKLVDVLAQQADVVARCQGGNNAGHTIVVDGKKFDFHMLPSGLINPDCVSVIGNGVVIHLPSMFAELEKTEEKGVSCAGRLLVSSRAHLVFDVHQVVDGLREMERGGSTIGTTRKGIGPAYSSKASRSGLRIHHLLNNFDSFASHLRTFIANRKKRYGDFEYDVDAEIQRYREFAERLRPMVTDTVYYMNQSVLEGKRVLVEGANAAMLDIDFGTYPYVTSSNTTIGGVCTGLGLPPTRVNKVIGVVKAYTTRVGGGPFPTEQLNEVGEHLQTVGAEFGVTTGRKRRCGWLDLVVLRYSHLINGYTSINLTKLDVLDKLPEIKIGVTYRHKPSGKIVPSFPADLDYLGECEVEYETLPGWMTDISKCTSWEQLP…
PF00709	Bden_FungiChy	RPGVTVVLGSQWGDEGKGKLVDVLAQDIDVCARCQGGNNAGHTIVVNGVKFDFHLLPSGLINPACQNIVGNGVVVHLPSFFQEIETTVSKGIKVAGRLFLSSRAHLVFDFHQIVDGLKEDELGRGSIGTTKKGIGPAYSSKASRSGLRVHHLFEFEEFEASFRQMVANKKKRYGDFQYDVDAEIARYRDYAARLPEYVIDSIKFMHDQINSGKRVLIEGANALMLDLDLGTYPYVTSSNTNIGGVCTGLGIPPQKIGRVIGVAKAYTTRVGAGPFPTEQLNASGDILQTVGQEFGTTTGRKRRCGWLDTVVLEYSTMINGYTSLNLTKLDVLDGLDEINIGVAYYYNGKKLDSFPANLHVLANVEVKYETLPGWKIDISKCRKFEELPVNAQKYVSRVE…
PF00709	Spun_FungiChy	KVTVVLGAQWGDEGKGKLVDILAQEIDVCCRCQGGNNAGHTIVVNGVKYDFHLLPSGIINEKCVGVIGNGVVVHLPSFFAELENLHKKGLDATGRLFLSERAHLVFDYHQIVDGLKEVELGRGSIGTTKKGIGPAYSSKASRSGLRVHHLYHFEEFEEKFRNLVTNRKRRYGDFEYDVEAELARYKDLAEKLRPYVVDNIKYVYDAIQAEKKVLVEGANALMLDLDFGTYPYVTSSNTTVGGVCTGLGIPPSKIGKVLGVVKAYTTRVGAGPFPTEQLNDIGEHLQTVGAEFGTTTGRKRRCGWLDVVVLRYSQMINDYTSINLTKLDVLDQLPEVKIGVAYIYEGKRLDSFPADLRVLEKCTVEYETLPGWQQDISKCRTFKDLPLNAQKYVARVEEL…
PF00709	Mver_FungiZyg	VTVVLGAQWGDEGKGKLSDILSQEADVCARCQGGNNAGHTIVVGKTKYDFHMLPSGLVNENCTSIVGAGVVVHVPSFFEELSNLEKKGLDCTGRLFVSDRAHLVFDVHQIIDGLKELELGRGSIGTTRKGIGPTYSSKASRSGLRVHHLYNFEEFADKFRTLVANKHKRYGAFDYDVEAEIARYKILAEKLKPYVIDSVYYMNKAIKGNKKVLVEGANALMLDLDWGTYPYVTSSNTTIGGVCTGLGIPPQTITKVVGVVKAYTTRVGGGPFPTEQLNEIGEYLQTVGFEVGVTTGRKRRCGWLDMVVVNYSTIINGYTSINITKLDILDQLDEIKIGVAYKVDGEILEGFPANLSLLERVEVVYETVPGWKTDISKCRTFEDLPANAQSYIRRIEALC…
PF00709	Mcir_FungiZyg	SVVLGAQWGDEGKGKLSDILCGEADVCARCAGGNNAGHTIVVNDVKYDFHMLPSGLINPNCTALIGNGVVVHLPSFFEEKAKLEAKGLNCEGRLLLSDRAHLVFDLHQKVDGLKEIELGRGSIGTTGKGIGPTYSSKASRSGIRVHHLYEFEEFSARFRTMVENKRKRYGNFEYDVEAELERYKELAERVRPYVIDTIPYLHEQIKAGKRILVEGANALMLDIDFGTYPYVTSSATSIGGVCTGLGVPTNKIDKVVGVVKAYCTRVGGGPFPSEQLNEIGEHLQTVGFEFGVTTGRKRRCGWLDLVVVNYSTMINGYTSFNLTKLDILDQLPTIKVAVAYHLDGKKLPSFPADLDLLEKVEVEYVELPGWQTDISKCTKYEDLPENAKKYIAFIEKETG…
PF00709	Rory_FungiZyg	SQISVGLGSQWGDEGTGQLSDILCAEADICARCAGGNNAGHTIVVNGVKYDFHMLPSGLINPNCIALVGHGVVVHLPSFFEEKEKLEAKGLDCEGRLLLSDRAHLVFDLHQKIDGLKEVELGRGSIGTTGKGIGPTYSSKASRSGIRVHHLFQFEEFSARFRSMVENKRKRYGNFEYDVEGELERYKVLAERVKPYVVDTIPYLHEQIKAGKRILVEGANALMLDIDYGTYPFVTSSSTSIGGVCTGLGVPPSKISKVVGVVKAYCTRVGGGPFPTEQLNEIGEHLQTVGFEFGVTTGRKRRCGWLDLVVVNYSNMINGYTSFNLTKLDILDQLPTIKVAVAYHLDGKKLTSFPADLDLLAKVEVEYVELPGWMTDISKCTKYEELPENAKKYISFIEE…
PF00709	Crev_FungiZyg	DNNTKASVVLGCQWGDEGKGKLVDILAKDIDVCVRCQGGNNAGHTIVVDGVKYAFHMLPSGLVNLKCVSVVGSGVVVHLPSFFSELEELEAQGLDCDGRLFISDRCHLVFDFHQIVDGLKEGELGRGSIGTTKKGIGPAYSSKASRSGIRVHHLYHPEEFEKRLRTIVAARYRRYGDFGYDVEAELARYKQLAQRLRPYVIDSVEYLHNSLGAGKRVLVEGANALMLDIDFGTYPYVTSSNTGVGGVCTGLGIPPSKIGNVIGVAKAYTTRVGGGPFPTELLDDVGQKLRDVGAEYGVTTGRPRRCGWLDMVVLRYSTMINGYTAINLTKLDVLDVFDEIKVAVSYVIGGKKVTAFPADLDDLESATVNYVTLPGWNQSISKCRSFAELPENCQKYVRF…
PF00709	Pisp_FungiNeo	EGGNNAGHTIVVNGVSFDFHLLPSGLANPKCVSLIGNGVVVHLPSFFKEIEVNESKGLSCQGRLFVSDRAQLVFDYHQLVDGINEVNLGKANIGTTHKGIGPAYSSKASRSGLRVHHLYNWPEFERRFRLNVVNKMKRFGEFEYDVEAELAKYKEYADRLKPYVVESVNFINTAINSGKKVLVEGANALMLDIDFGTYPYVTSSNTSIGGVCCGLGISPKKIGNIYGVVKAYTTRVGAGPFPTELNDEDGDKLQSIGAEFGTTTGRRRRCGWLDAVVLRWSQMINDYTTINVTKLDVLDQFDTIKIGMNYIYEGKKLESMPPDLDILNKVEVEYITMPGWKQDISKCTSYEELPENAKKYIEKIEEIMGVPVEYIGVGAGRNSMIK
PF00709	Rirr_FungiZyg	KSDLSDKGVTVVLGSQWGDEGKGKLVDILAQEADVCARFAGGNNAGHTIVVNGTKFAFHLLPSGLVNPKCISIIGSGVVVHLPSFFSELEQLEAKGLNVKDRVFISDRAHLVFDFHQIVDGLKEPAYSSKASRSGLRVHHLSNHQAFAEKFRQLVANRMKRYGNFEYDIGAEIERYKELAIRLQPYIVDGVVFMNKCIASNQKILVEGANALMLDLDFGTYPFVTSSNTTVGGVSTGLGIPPSKVDKVIGVVKAYTTRVGGGPFPTELLDEAGKYLQHTGAEIGSTTGRVRRCGWLDLVVLKYSTLINGYTSLNLTKLDVLDNLPEIKIATAYLLDGKPLESFPADLETLERATIQYETLPGWQTDISKCRQFSDLPINAQNYIKIIEKYLEVPIEWIG…
PF00709	Ccor_FungiZyg	YNGAGKVTVVLGAQWGDEGKGKLVDILAQETDICARCQGGNNAGHTIVVDGKKFDVHLLPSGIINPNCICVIGHGTVVHIPSLFEEIEKIQKGGLDCTGRVLLSDRAHLVFDLHQIGDRLREVELGKGSIGTTGKGIGPTYSTKATRAGVRVHHLVSNFEEFEFRYRGLYDTYRKRYGDFEYDIEKEIQRYKELAERVRPLTVDTIAYLHEALDQGKKVLAEGANGLMLDLDAGTFPYVTSSNTSIGGVCTGLGLPPSKIGPILGVVKAYTTRVGGGPFPSEQLNQVGEHLQTVGHEFGVTTGRTRRCGWLDLVVMKYSCRINGYTSINLTKIDVLDQLDEIQVAVAYKINGKVVDSFPADLNSLEGVEVVYETLPGWKTDLSQCKDFASLPSQAQDYV…
PF00709	Cneo_FungiDik	PSPEGVTVVLGAQWGDEGKGKLVDILAAEADICARCAGGNNAGHTIVVRNDKGEKTSYAFNLLPSGLINPECTAFIGSGVVVHVPSLFNELDTLERKGLKVAGRLLVSDRAHLVMGFHQIVDGLKEVELGGSSIGTTRKGIGPAYSSKASRSGLRVHHLFDPTFPAKFRKLVEGRFKRYGHFEFDTEGEIEMYLAFAERLRPFIVDGPTFMHNALSSGKRVLVEGANALMLDLDYGTYPFVTSSSTSIGGVVSGLGISPFAIKRVVGVIKAYTTRVGGGPFPTEDLATVGETLQEVGAEYGTVTGRRRRCGWLDLVVMKYSTMINGYTSLNLTKLDVLDGFEEIKVATGYKIDGVEVEGFPADLDRLAKVEVQYATLPGWKTDISNCKTYEEFPENAKA…
PF00709	Umay_FungiDik	KPSDSKTGGKATVLLGSQWGDEGKGKLADVLSGQMDVCARCAGGNNAGHTIVADVNGVKTKFDFHLLPSGLVNPRCAGFIGSGVVVHVPSFFAELDTIQKKGLNCDGRLFISDRAHLVFDFHQVVDGLKEVELGGSSIGTTKKGIGPAYSSKASRSGLRVHHLYDPELFATKFRKLVEGRFKRYGHFEYDTEGEIARYRAFAERLRPHIVDGVTFIHTALAQNRKVLVEGANALFLDIDFGTYPFVTSSSTSIGGVLTGLGIPPTAIGDVIGVMKAYTTRVGMGPFPTELHEEIGHHLQEVGAEYGVTTGRRRRCGWLDLVMMRYSCLINGYTSLNLTKLDVLDQLKEIKICVGYVVDGKELPSFPADLEVLAKVEVQYKTLPGWQQDISKTTTWEELP…
PF00709	Gpro_FungiChy	GNKAVVVLGAQWGDEGKGKLVDILTQQADLVARCQGGNNAGHTIVVDGVKFDFHMLPSGLLGAPSTVSLVGSGVVLHLPSFFEEVKKTESKGVSCANRLFVSDRCHLVFDLHQIVDGLKEGELASHKQEIGTTKKGIGPAYSSKASRGGVRVHHLIAPDFAEFESRFRQMAANKKRRYGDFPYDVDAEVERYRQYRDLIRPYVVDSVTYVHKALQEGKRVLVEGANAVMLDIDFGTFPYVTSSNTTIGGVCTGLGLPPKSIGKVIGVVKAYTTRVGAGPFPTEQLNEVGEHLQTVGAEFGVTTGRKRRCGWLDAAVLRWSHMINGYDSINLTKLDILDGLPTLRIGIAYKHRATGQVYETFPADLHLLEECDVIYEELPGWKESIGGCKSWDALPENAR…
PF00709	Nspp_Discicristoidea	VVAVMGAQWGDEGKGKLVDVLAQTADVVARCQGGNNAGHTIVLNGVMYDFHMVPSGLVNPACQVLIGNGVVVHVPALFQELDKLKGKGVAWEGRTFVSDRAHIVTDFLQKVDGLEEGERGSSSIGTTRKGIGPTYSLKATRTGLRIHDLFNFESFAQRFRANLDVMKKRFGNFEHDGEAELATLRTLAERLRPMVVDSVVFMHEAIKAKKHVLVEGANAVMLDLDFGSYPYVTSSSAAVGGACTGLGIPPHVIGDVYGVVKAYTTRVGEGPFPTEQLNAIGEHLQKVGHEVGVTTGRKRRCGWLDAVVLKYSTMINGYTGINLTKLDVLDDLEELKIGVAYKVDGQELRSMPADLGVLARVEVVYETLPGWKTDISAARQLGDLPANARAYVLRVQELV…
PF00709	Adig_Metazoa	GRKSPKEKTGAKVTVVLGAQWGDEGKGKLVDILSTDADLVCRCQGGNNAGHTVVVESKEYFFHMVPSGLIQPKAVSVIGNGVVIHIPQFFEELEALEAKGVTDWQGRLLVSDRAHIVFDLHQESDKLREGGKGGLGTTKKGIGPTYASKAQRIGLRICDLVGDFNVFEQKFQGLVSHFKRLYPDLSTDIQAELEKYKIYAEKIRPLVCDTVSYMHKALQNESAKIIVEGANALMLDIDFGTYPFVTSSSCAVGAVCTGLGIPPTAIGNVYGVTKAYTTRVGRGGFPTELKDEIGDKMQRIGREFGVTTGRKRRCGWLDLVMIRYSHMINNFTSLVIAKLDVLDTFEEVKIGISYKHKGKVLESFPASVEILDEIEVEYITLPGWMTSISDCRSFSGLPE…
PF00709	Nvec_Metazoa	AVANGPTSSPRAAIGPKTKVTVVLGAQWGDEGKGKLVDILATNADVVCRCQGGNNAGHTVVVGDKHYALHMLPSGMINPHSMNVIGNGVVIHIPQFFEELEKLEAKGIPEWKDRLIISERAHLVFDLHQEADKLKESGKTSLGTTKKGIGPAYASKAQRLNLRVCDLLGDFSVFAEKFTSLAHHFQRLYPDLVVDIEDELKKYKVFAEKVRPLARDTVSFMNKILQTPDNRVVVEGANALMLDIDFGTYPFVTSSNCSVGAVCTGLGIPPQAIGNVYGVTKAYTTRVGMGAFPTELFDELGNQMQEIGREFGVTTGRRRRCGWLDLVMIKYSHMINGFTALAIAKLDVLDTFEEVKLGVAYRYKGELLSSYPASLEVLSKVEVEYLTLPGWKTSITNCR…
PF00709	Ocar_Metazoa	KRSKGDLESGVFVILGSQWGDEGKGKLVDQLASQADVVCRCQGGNNAGHTVVVGDTTYDFHLLPSGIIHESCTAVIGNGVVVNLPELFEEAAKMESKGVKGSWRDRLLISDRAHLVFGMLQEVDALLEQEKGKSSLGTTKKGIGPTYAAKASRSGLRLCDLLGDFDDFAKRFVMLAEGYQKRFSSLNVDVQEELQKYKTLADQVRPMVTDTVHYMNTALATGKKILAEGANATMLDIEFGTYPYVTSSICSVGGVCSGLGIPPQSVDRVCGVVKAYTTRVGVGYFPTELEDEIGNKMQEIGREWGVTTGRRRRCGWLDLVVVKYTATLNGYSSLAVTKLDVLDTFKELKIGVGYTLNGEQLPSFPADQRLLKDVEVEYVSIPGWETSTKDCRTFERLPS…
PF00709	Sdes_IchthyosporeaDermocystida	SVVLGSQWGDEGKGKLVDILAQEADVVCRCAGGNNAGHTIVVGKTSYDFHLLPSGLVHDKCTSIIGSGVVVNIPAFFEELEKNAKKGLKNFENRLFISDRAHLVFSFHQEIDGIQEQEKGKGSLGTTKKGIGPAYSAKMERTGLRICDLLGDWSTFEAKLKVAVDNHKKRYKSLVVDIEKELNYYKNIRPKIRPYVTDSVLYLNRILAEGSKKVLVEGANATMLDIDFGTYPYVTSSSCSIGGVCTGLGISPNKIGAVYGVVKAYTTRVGDGAFPSELFDENGKKLQEIGKEFGVTTGRKRRCGWLDLVVVRYTHMINNYSYIAMTKLDVLDTFAEIKIAVAYRGKKLDSFPADMKILSEVEVEYITLPGWNQSIAECKTKEQLPKNALSYVRKVEELL…
PF00709	Nk52_Ichthyosporea	KRQKLSTIEKVSVVLGSQWGDEGKGKLVDILAQDADVVARCAGGNNAGHTIVVGDVHYDFHVLPSGIVSENCMSVIGNGVVLNIPAFFEELAYNEKKGLKGYEKRLLVSDRAHLVFTFHQSIDGIQEVEKGKGSLGTTKKGIGPTYSAKMARSGLRVCDLLGDWDSFESKFRKNVENHKKRYAALDADVEKELKYYKDVRSKIKPYVADTVLYCNEALREGKKVLVEGANAAMLDIDFGTYPYVTSSSCTVGGVCTGLGVSPQRVGSVYGVVKAYTTRVGDGAFPTEQINEVGEKLQEIGKEYGVTTGRRRRCGWLDLVVVKYTHMVNEYASIAITKLDVLDTFDEIKIGVAYKHKNKVLPSFPADMKFLEDVEVEYITMPGWKQSIADCKKRKDLPEN…
PF00709	Clim_Corallochytrea	SQSKTTTKLNNLWEFKTMSFPELKGKVGIVLGAQWGDEGKGKLVDILACDADIVARCAGGNNAGHTIHIGDVKYDFHLLPSGIIHEAAASVIGNGVVIHLPSLFAELEANEAKGLKGWENRLIISDRAHLVFDMHQRIDGLEEAEKGSGHIGTTKKGIGPTYSAKAGRWGFRVCDILGDQAAFAEKFTKVVANYQKRYPDLKVDVDSELARYKDYAERIRPMVRETALLCNKAIKEGNKFVLIEGANAAMLDLDFGTYPFVTSSSAAVGGACTGLGIPPTKINEIFGVVKAYTTRVGGGPFPTEQLNQAGDSLQEIGHEYGVTTGRRRRCGWLDLVVVNYTSMVNGYTAIMLTKLDVLDSFEDIKIGVAYKLDGRNLESFPADLDLLAKVDVEYITLPG…
PF00709	Clii_Corallochytrea	KVGIVLGAQWGDEGKGKLVDILACDADIVARCAGGNNAGHTIHIGDVKYDFHLLPSGIIHEAAASVIGNGVVIHLPSLFAELEANEAKGLKGWENRLIISDRAHLVFDMHQRIDGLEEAEKGSGHIGTTKKGIGPTYSAKAGRWGFRVCDILGDQAAFAEKFTKVVANYQKRYPDLKVDVDSELARYKDYAERIRPMVRETALLCNKAIKEGNKFVLIEGANAAMLDLDFGTYPFVTSSSAAVGGACTGLGIPPTKINEIFGVVKAYTTRVGGGPFPTEQLNQAGDSLQEIGHEYGVTTGRRRRCGWLDLVVVNYTSMVNGYTAIMLTKLDVLDSFEDIKIGVAYKLDGRNLESFPADLDLLAKVDVEYITLPGWKTSTQECRTWDSLPPNAKAYVKKI…
PF00709	Colp12	VVVVLGAQWGDEGKGKLVDILACNANVVARCAGGNNAGHTIVVGDAKYDFHMLPSGVIHESCMSVIGNGVVVHIPALFEEIAKNEAKGLKNTTSRLKVSDRAHIVFDLHQQVDGLQEVEKGKGSIGTTRKGIGPCYASKANRNGIRISHLVGDFEGFATKFRTLVNYFQRTYPALQVDIDAELARYKELAERIRPLVCDTIPYMNKAVNTPGNYVLIEGANAIMLDLDYGTYPFVTSSSAGVGGVCTGAGVPPTKINKVYGVVKAYTTRVGDGPFPTEQLNAHGEALQTIGAEFGVTTGRKRRCGWLDMVVLQYSHMINGYTSIMLTKLDVLDTFDEIKIGVAYHYKGERLEGFPADLDILGAVEVEYITVPGWKADITKARTFDELPPNAQSYVRTIE…
PF00709	Apar_IchthyosporeaIchthyophonida	LGSQWGDEGKGKLVDMLAGECDVIARCQGGNNAGHTIVTNGVKYDFHILPSGIIHEHAKSVIGNGVVIHIQSLFEEAEKNEAKGLRGWQDRLLISERAHIVFNFHQEIDGLQEEEKGGKSIGTTKKGIGPTYSSKASRINLRVGDLLGNFETFSERFKGMVSGYQKRYPKLQVDIEKELAMYKVLAERIRPMVADTVCFLYKTLEEGNKRILVEGANAQMLDLDFGTYPYVTSSNCSVGGACTGLGIPPSKIKQVFGVVKAYTTRVGGGAFPTEQLNEVGEKLQTIGFEVGVTTGRKRRCGWLDLVVVRYTHMVNGLTSLMITKLDVLDTFPEIKVAVAYKLHGKALDNFPSNLDDLQEVEVVYETLPGWQADTTNCRQWAELPPNAQSYCKFIENFLK…
PF00709	Ihof_IchthyosporeaIchthyophonida	QVVMVLGTQWGDEGKGKLVDMLAGDCDVIARCQGGNNAGHTIVVDGVKFDFHLLPSGIIHEKCKSVIGNGVVIHLQALFDEAAKNEAKGLKDWQNRLLISDRAHIVFNFHQIDGLQEEEKGGQSIGTTKRGIGPTYSSKASRTNLRLAELLGDFELFGDRFKSMVAGYQKRYPKLAVDIEGELAFYKEMAERIRPMVQDTVWFLNQQMADNTKKILVEGANAQMLDLDFGTYPYVTSSNCSVGGACTGLGIPPNKINQVFGVVKAYTTRVGGGAFPTEQLNADGEALQTIGAEFGVTTGRKRRCGWLDLVVVKYTHMVNGLTSIMITKLDVLDTFKEIQIGVGYKVDGVLLKNFPANLETLNKVEVEYVTLPGWEQDISQCRTWADLPVNAQNYVKFIE…
PF00709	Ihou_IchthyosporeaIchthyophonida	GGNNAGHTIVVDGVKFDFHLLPSGIIHEKCKSVIGNGVVIHLQALFDEAAKNEAKGLEMAERIRPMVQDTVWFLNQQMADNTKKILVEGANAQMLDLDFGTYPYVTSSNCSVGGACTGLGIPPNKINQVFGVVKAYTTRVGGGAFPTEQLNDGEALQTIGAEFGVTTGRKRRCGWLDLVVVKYTHMVNGLTANLETLNKVEVEYVTLPGWEQDISQCRTWADLPVNAQNYVKFIEDFLKVP
PF00709	Cfra_IchthyosporeaIchthyophonida	MLGPVLVKGKACMVFGTQWGDEGKGKLVDILADEADVIARCAGGNNAGHTIVVGDAHYDFHLLPSGIISENTLSIIGNGVVVHIESLFEEAAKNEEKGLKNWQDRLIISDRAHIVFDMHQDIDGLQEAEKSAGGSSIGTTKKGIGPTYSCKTERSGLRMAELLGDYDTFAEKFRMMASGCQKRHADLVVDIDAELAKYKVLAEKVRPMVQDAVYTVFDSLQNDKSVLVEGANAQMLDIDFGTFPYVTSSSCSVGGACTGLGIPPSKLERVFGVVKAYTTRVGGGAFPTEQLNSEGEALQTIGAEFGVTTGRKRRCGWLDLVVLKYTHMINDLYSIMITKLDVLDTFKEIKVGVKYNYKGKPLNSFPACMEVLTQVEVEYVTLPGWNCSIKHCRTYDELP…
PF00709	Sarc_IchthyosporeaIchthyophonida	KACMVFGTQWGDEGKGKLVDILADEADVIARCAGGNNAGHTIVVGDAHYDFHLLPSGIISENTLSVIGNGVVVHIESMFAEAAKNEKKGLKNWQDRLVISDRAHIVFDLHQEIDGLQEVEKSAGGKSIGTTKKGIGPTYSSKTERTGLRMAELLGDFSEFSERFRTMVAGAQMRHSDLVVDVEAELAKYLAEEVRPMVKDTVYVMYDALQKNQAVLVEGANAQMLDIDFGTFPYVTSSSCSVGGACTGLGPPSKLERVFGVVKAYTTRVGGGAFPTEQLNDDGEKLQQVGAEFGVTTGRKRRCGWLDLVVVKYTHMINDLYSMMITKLDVLDDFAEIKVGIKYSHKGQPLDNFPACMDVLNEVEVEYVTLPGWQTSIRTYDDLPENAKNYLKFIADFLG…
PF00709	Awhi_IchthyosporeaIchthyophonida	VCMVFGSQWGDEGKGKLVDILAGDCDIVARCAGGDNAGHTVVVNEVSYDFHVLPSGIIHQDCLSVIGNGVVLNLPSMFQELQKNVDKGLTGWEDRLIISDRAHLVSKMHQAVDAYQEDEKKTTGSSIGTTCKGIGPSYSSKMSRLSVRVCDLMGDFAYFEEKFRKLAKFFVRAYPGLTVDIEGELASFKDLAERIRPMVRDTVVLMNEYISAGDKRILVEGANAQMLDIDFGTYPYVTSSNCSVGGACTGLGLPPSKIGKIFGVVKAYTTRVGGGAFPTEQLNEIGESLQSIGHEFGVTTGRKRRCGWLDMVVLRYTHMVNGLSSIMLTKLDVLDTFDEIKIGINYLVDGKPLPGFPADLNVLAKVEVEYITMPGWKTDITKCASFEELPEAAKNYTRK…
PF00709	Pgem_IchthyosporeaIchthyophonida	VCMVFGSQWGDEGKGKLVDLLAGDCDVVARCAGGDNAGHTVVVDGVSYDFHLLPSGICHESCLSVIGNGVVLNLPSLYSELAKNEAKGLKGWENRLIISDRAHLVFPMHQAVDGYQETEKAKKGTSIGTTCKGIGPTYSSKMARHNLRVCDLIGDWTYFESRFRNLANFYIRAYPNIQIDIEKDLADCKVLAEKIRPLVQDTVVYMNKVLNEKKRILVEGANAQMLDIDFGTYPYVTSSSCSVGGACTGLGIPPTKMSKIFGVVKAYTTRVGGGDFPTEQLNEVGESLQSIGHEYGVTTGRKRRCGWLDMVVLRYTHMINGLSSIMITKLDVLDTFEEIKIGVNYKVNGKTLDGFPADMNKLSEVEVEYITMKGWKQDISKCKTFEELPQNAQIYVKKI…
PF00709	Bflo_Metazoa	RLRYHGNKVTVVLGAQWGDEGKGKVVDMLGTDADVVCRCQGGNNAGHTVVVEGTEYDFHLLPSGIINDKAISVIGNGVVIHLPGLFEEAGKNEAKGLIDWQDRLIISDRAHLVFDFHQAVDGLQELEKGGKSLGTTKKGIGPTYSSKAARSGLRVCDLLADFKVFSDRFKMLVTQYERMFPNLKVDVDKELKRYEDLKERVRPMVKDVVHFLNTQLEGPQKKLLVEGANATMLDIDFGTYPYVTSSNCTVGGVLTGLGIPPRCIGEVYGVAKAYTTRVGDGAFPTELNNELGELLQERGHEFGVTTKRKRRCGWLDLVLLKYADMINGFTAIALTKLDILDVFDELKIGVAYKLDGKKLPNFPANQEMLKQVEVEYCTMPGWKTNTENLRSFHDLPENA…
PF00709	Xtro_Metazoa	SSHPGGHKRPRYDVGNKVTVVLGAQWGDEGKGKVVDLLATDSDIICRCQGGNNAGHTVVVEGKEYDFHLFPSGIINPKAISFIGNGVVIHLPGLFEEADKNEKKGLKDWEKRLIISDRAHIVCDFHQAVDGLQEVQRQAQEGKNIGTTKKGIGPTYSSKASRTGLRICDLLSDFDEFSARFKNLAHQHQSMFSNLEVDIDGQLKKLKMYAEKIRPMVRDGVYFMYEALHGSPKKILVEGANAALLDIDFGTYPFVTSSNCTVGGVCTGLGIPPQNIGDVYGVVKTYSTRVGIGAFPTEQINEIGNLLQTRGHEWGVTTGRKRRCGWLDLVILRYAHMINGFTALALTKLDILDVLDEIKVGVAYRLNGKRIPYFPANQEILQKVEVEYEAMPGWKCDTT…
PF00709	Cowc_Filasterea	TVVLGAQWGDEGKGKLVDILALHSDVVCRCQGGNNAGHTIVVDGVMYDFHLLPSGIINVDATSVIGNGVVIHLPGMFEEIEKNVLKGLVGWEQRLIVSDRAHLVFDFHQTIDGLQELEKGRGSLGTTKKGIGPCYTSKASRTALKSDGPSFKVDVDAEIERYRSLAERVRPLVKDTVYYLHDALVNKNKRVLIEGANAALLDLDFGTYPYVTSSNCTVGGACTGLGVPPRAIKQVFGVVKAYTTRVGDGAFPTEQLNVVGETLQQVGREYGVTTGRKRRCGWLDLVVVKYAHMINAFDGIALTKLDILDSFETIKIGVAYKHKGALLDAFPGNLAVLGEVEVEYIEMPGWKCDISGVRQFSALPVNAQNYVRKIEELSGVKVRWVGVGQARDAMIEL
PF00709	Dpul_Metazoa	RPRLLEANQGKNKATVILGAQWGDEGKGKVVDMLAGDADIVARCQGGNNAGHTVVVGDKEYDFHLLPSGIINPKSKSIIGNGVVVHLPQMFEELQKNEAKGLTHLRDCLLISDRAHLVFDFHQQADGLQEQEKGGKSLGTTKKGIGPTYSSKATRNGIRIADLLGDSLMFAEKLRTLVAAYQRMLPDLNVDIDAELEKYKGYAEQVRPFVVETISYLNGAVKAGKTVLVEGANAAMLDIDFGTYPYVTSSNCSVGGVCTGLGLPPSLIGDVYGVVKAYTTRVGDGPFPTEQLNEIGELLQTRGGEIGVTTKRKRRCGWLDLAVLRHTHMVNGYTAIALTKLDILDVLPEIKIGVSYSLNGKELNHFPTSTTELAAVEVNYITLPGWETSTEGVRTFDDL…
PF00709	Skow_Metazoa	DNYYSENCNVNGDVCPQKIKPGIVNKVTVILGAQWGDEGKGKVVDMLSEKADLVCRCAGGNNAGHTVVVGDTEYDFHLLPSGIIHEHCKNVIGNGVVIHLPGLFEEAERNNLCNWGDRLMISDRAHLVFDLHQTVDGLQELAKGKNSIGTTKKGIGPTYSNKAGRSGIRICDLLGDFELFSNKFRNLVNAYQKVHPELTVDINKELTKYKEYGDKIRPMVGDTIYALFEALNDPHKNIIVEGANATMLDIDFGTYPYVTSSSCSVGGVCTGLGIPPCKVGDVFGVFKAYTTRVGEGILPTEQFGEVAEILQKQGHEYGTTTGRKRRCGWLDIMVIKYSHMVNGYSALCMTKLDVLDTFEELKVGVAYKYHGKTLSSFPADQDMFNSVEVEYVTLPGWKE…
PF00709	Ctel_Metazoa	NGVTVVLGAQWGDEGKGKIVDLLATSADVVCRCQGGNNAGHTVVVGDTAYDFHLLPSGIIHKESISVLGNGVVIHLPGLFDEIQKNEAKGLTGWQQRLLISSQAHLVFDFHQQVDGLQESLRGKQLIGTTKKGIGPTYSSKATRNGIRVIDLVHDFDVFAEKYKNLASYFMKRYPDLAIDIEKDLKTYKDYSNTIRPMVVDTVTFMHKQLQDKSKRILIEGANATMLDIDFGTYPMVTSSNCSVGSVCTGLGVPPRHLKEIYGVVKAYLTRVGSGCFPTEAEPAIDLELRTRGAEFGVTTGRPRRCGWLDMVMLRYANMVNGFTGIAITKLDILDTFTEVKIGVAYKKNGVLLEEFPSSQEAFQGIEVEYLTLPGWQSPTDHCRKFSELPSNAQAYVRT…
PF00709	Lgig_Metazoa	SAIPIINGQNGDSQAKKPKLSDDNRVTVVLGTQWGDEGKGKVVDLLAAKADVVCRCQGGNNAGHSVHIGEKEYAFHLLPSGIVNPDCTAVIGNGVVVHVPNLYEEVKKNEKHGLPDWKNRLLISNRAHLVFDMHQQVDGLQESGRGKNLIGTTKKGIGPTYSSKVTRNGLRMCDLVGDFEIFKAKFQNLVDYHKRIFPDLSVDVESELKRYEAYRNEIQPLVTDTISYLYTAIRNGKNILIEGAQSAILDIDFGLYPYVTSSNCTAGGVCTGLGIPPRSIGDIYGVVKAYLTRVGTGGFPTEQSNEIGNVLLTKGAEFGVTTGRPRRCGWLDMMMLKYANMINGFTALAITKLDILDDFKEIKIGVSYHIDGKKIETFPACDEVLQKVKVEYLTLPGWE…
PF00709	Tadh_Metazoa	NSLVVILGAQWGDEGKGKIVDLLASQADIVCRCQGGNNAGHTVVANGKTYHFHLLPSGIIQSNCTSVIGNGVVIHLPGLFAEIEAIEKNGVQDCWSKLKISDRAHLVFDFHQEADGLLELEKGDSKIGTTKKGIGPAYSTKASRVGLRVCDLMGDFEDFTKKFKNLVKGYRKRFSELEVDVEKELERYKRYADIIRPSIEDTVFFLSEELKKGNKNIIVEGANAVMLDLDFGTYPYVTSSSCGIGGVCTGLGLPPSTIRNVVGICKAYITRVGAGDFPTFLDSDIGTKLQDIGQEFGTTTGRRRRCGWLDIVVLDYVNRISGLTSIAVTKLDVMDTFEEVKIGTAYIHNGQKLKSFPADHSILSEVEVEYITMPGWKQNISLCRKFSDLPENAQAYILK…
PF00709	Mbre_ChoanoflagellataCraspedida	KVAVVLGLQWGDEGKGKLVDVLAEDADVVARFAGGNNAGHTVVVDNISYDFHLLPSGIGHAKCDCVIGNGVVIHLPGLYEEVEKNMAKGPHLQGWQSRLKISDRAHLVLDLHQKVDGMKEEERGLDKIGTTKKGIGPTYSSKAIRHGLRVCDLMGDFGIFKQKFLQVVEHYQKLFPSLEVDVDAQLKAFEGYAEKVRPMVTDTTLLVHRYLKENKRVLLEGANATMLDLDFGTYPYVTSSSCCVGGICTGLGLPPQAVGDVYGVVKAYTTRVGDGAFPTEDFAEVGNYLQTKGHEYGVTTGRKRRCGWLDMMVVNYACMINGVTKICLTKLDVLDELETIKIAVAYKKGGEALLGMPASQQVLNEVEVEYVDMPGWQTNISEIRDFEALPTQAQAYVRK…
PF00709	Sros_ChoanoflagellataCraspedida	NVTAVIGLQWGDEGKGKLVDILAPGFGVVARFAGGNNAGHTVVIDGTSYAFHLLPSGIAHKSCTSVIGNGVVVHLPGLMKEIKANTEKGPHLAGWESRLKISNRAHVVLDIHQVVDGLTETERGVSKIGTTKRGIGPTYSCKATRNGLRMCDLLGDEDHLRAKVAAVCGMYQRLFPSITVDVEAELAAIQQYLDTIRPLICDTFAEIHLQEKGHEYGTTTARPRRCGWLDLVVINYACKLNGVTAICLTKLDVLDDLAEVKIGVSYTSPSNTYTCSMPASQEEMAQCTVEYITLPGWQQSIEAVRKFEELPANAKAYIAKIEELVGVPVRWIGVGKEREATI
PF00709	Aque_Metazoa	VTVVLGGQWGDEGKGKLVDLLAEKVDYVCRCQGGNNAGHTVIAGGTAYDFHLLPSGIINETCTSVMGNGMVIHLPGLFDEIQKNVAKGLKGWEERLKVSDRAHIVFDFHQKIDQLIEKEKAIGTTKKGIGPTYAAKSTRSGLRICDLFTEPAVLREKLENLLSGYFIRFPTLEVNIDEEIKKCEEYKEKLRPLVCDTIQLVNKAVSDGKSVLVEGANAVMLDIDFGTYPYVTSSNCTAGVVCTGLGIPPRRIDRVYGVFKAYTTRVGGGAFPTEQKNEIGDKIQSIGKERGVTTGRKRRCGWFDVMVAKYSNTINGYESIALTKIDIFDTFKELKIGVAYNLDGKKLDSMPAEQSQLERVEVDYVTLPGWAPEVTAGVTNYDQLPINARNYIEKIEELI…
PF00709	Mvib_Filasterea	VAVVLGAQWGDEGKGKLIDLLAADADCVCRCQGGNNAGHTIVVGSVKYDFHLLPSGIINKSCSNVIGNGVVIHLPGLFDEIEKNAARGGMDDWSERLRVSDRAHLVFDMHQSIDGVQESRKGANKLGTTKRGIGPAYMSKVSRTGIRVHHLVNDFDDFQERFLKLVGDARGHYGDAIEIDTDAELARYREFAEKLRPLVVDTLPFVHGQWQSGKRILIEGANATMLDIDFGTYPYVTSSNCTVGGVCTGLGLPPRAISNVYGVVKAYTTRVGTGAFPTELLDETGTRLQDIGAEFGTTTGRRRRCGWLDMVVVKFAQLINGIDYIALTKLDVLDTFEEVKICVGYELDGKALEGMPADEAVLARVTPVYETLPGWQTPTTEVRSWAALPENARRYIDAI…
PF00709	Mlei_Metazoa	VTVVLGSQWGDEGKGKVVDLLAEQVDVVARCQGGNNAGHTVVVGETHYDFHLLPSGVVYKDVSCVIGNGVVVHVPSLFEEIDKNAAKGLSGIEDRLIISDRAHIVGDVHQTADGLFESEKQGNSLGTTKKGIGPTYSTKMQRTGLRMSDLLGDKASLQEKVKQIVQNYALRFPQHAFDAEAEFKRLESYIPRITPMIKDTVLHMNQSLNSNKRILVEGANAAMLDIDFGTYPYVTSSNCTVGGVCTGLGIPPTEITNVIGVVKAYTTRVGAGRFPTELTDEIGEAMVNIGHEYGVTTGRKRRCGWLDLMVLRYSHMVNGFTRLAVTKLDILDTFKELKVCTGYKLDGQELLSFPSDHTLLERIEPVYTTMKGWECPTVNCRTFESLPDQAKSYLNLITE…
PF00709	Dcos_ChoanoflagellataStephanoecidae	VSVVLGAQWGDEGKGKLVDILALDADIVARCAGGNNAGHTVIADGCKYDFHILPSGIISEGATAIIGNGTVIHLQQLLEEALHNVKLGNEQGKTHMNGWKNRLKISDRAHLVLDLHQTIDGLIEEEKNKTGKGIGTTKRGIGPTYSDKMSRIGFRVCDLLDTPELFEKKLATLVEGHKKRFPTLNVDVKKETKKMLELAEEIKPMVGNTLLTIHKALGKKKILVEGANAAMLDIDFGTYPYVTSSACTVGGVCTGLGIPPQHIRSVFGVCKAYTTRVGAGGFPTELTDETGKHLQEIGKEYGTTTGRARRCGWLDLVVLRHSSMVNGYTSIMVTKLDCLDQLKEIKVGVAYRLDGKILDGFPANSRLMDEVEVVYETLPGWQSDLTKAKTVNDLPKNAL…
PF00709	Hnan_ChoanoflagellataAcanthoecidae	VSVVLGAQWGDEGKGKLVDILAQHADLVCRCQGGNNAGHTIKVGSTTYDFHVVPSGIVSPHCKSVIGNGVVLHLEQFFDELQHNIDLDVKSGTGAMKGWEDRLVVSNRTHIVFDLHQQVDGLIEEERSAQAGSAGKIGTTKRGIGPTYAAKASRTGIRVADLYSNWDTFSKRFEALVATYQLRFPTLEVDIPAVLAKTKELAERLKPFVVDTVTYVNAALNKKKILVEGANALMLDLDFGTYPYVTSSSTSAGGVATGLGFPPRFIKQVFGVVKAYSTRVGAGAFPTELSYAEDGLGTKLRKIGHEFGVTTGRPRRCGWLDLHVLKWSNLINGYTSLMITKLDCLDSFPTLEVAVAYKLDGELIEGHPARVEDELERVEVVYETLEGWNTPTTGCKSYA…
PF00709	Ttra_Apusozoa	SRVTAVLGAQWGDEGKGKLADVLAEDYDVVGRFNGGANAGHTVIADGVKYAFHLLPCGLVYPHTLNILGNGTVIHLPSMFDELAQLDGTSVSWEGRLKLSNRAHLLFDYHQIIDGVLEERRGAGKSLGTTKKGIGPAYASKALRLGIRVGDLVDFDDFAAKFRSAVDSHQKMYGFDYGIDDELERYRAFADILTNGDMIVDSVAYVNQAYNDGKRIILEGANAALLDLDYGTYPFVTSSPTTVGGVCTGLGLAPGKIECTVGVVKAYTTRVGWGPFPTELTDDIGAHLQSVGGEIGVTTGRKRRCGWLDIPLLQYSNMVNGYSAVNVTKLDVLDDLETIKIGVAYRDSTTGETLAPGHMPSTIAELARVEVVYEEVPGWQSSTQGITEWAELPPNAQAY…
PF00709	Pbif_Breviatea	KADLIVGIQWGDEGKGKMVDMLAQNYDMVCRSQGGHNAGHTIWVDGVRYALHLIPSGVLNPNAINIIGNGVVLSPESIIKEMEQFDNLEGRLFISDKAHLNLPYHAEIDQAKEKLKGDKAIGTTGKGIGPAYAEKIARSGFRVGELLNPTKLATSIIEFFEQNRAIFDVLDIETPSKDELVALLESYKEKLAPYIANTTNMVWKALDEDKKILLEGAQGTLLDIDHGTYPYVTSSSTVSAGACTGLGISPKDIGVVTGIVKAYTTRVGNGPFPSEDFTEEGQKIADIGKEVGVTTGRGRRCGWFDAIAVKHAARLNGCDQLSLMKLDVLDGFPRIKICVAYDLDGEIIDYMPTDLESVRPVYEEIEGWDSVVGCREFDALPENAKKYIERIEELTGVKV…
PF00709	Rall_FungiCry	TVVLGSQWGDEGKGKLIHFLSKRCHGGDNAGHTIVSNDKVHKFHLLPCGLLRDHTKGIVGPGTVIHLPALMTEIQNLPDCSHRIFISPRAHLIFKFHRLIDGINETSRGVKRTGMRVGELLNFENFKERYLSMLNQLKQSFPLLESYSPEDELAELEDISRVIPSMILDTSRLINEALKSNKNVLIEGANGALLDIDLGTYPFVTSSNTTVGGLCTGLGISTKCISTIIGVVKAYCTRVGHGPFPTEITQGPVMEHLSSNGAEYGTTTDVLTGLDVLKVCVSYKWPNGMIVEDYPVGTNEFEQIVPEYVNFPGWKTDISKCVTFEDLPVEAQNYVNFIEDFVNVP
PF00828	Acas_Amoebozoa	RTGADFNRVVLKRLCMSRTNQPPLSLIKLARFTKGKEDKIAVVVGTVTDDARLLKFPKLTVCALRFTEGARTRILKAGGEILTFDQLALRAPTGANTVLLRGRKTARKATKHFGAPGVPNSTTRPKVANRSRKTERARGRRKSVGFK
PF00828	Bana_Breviatea	MGIDIDHRHPAKHREEPRSEDPYLHLLVKLYRFLARRTDSKFNKVVLRRLYASRINNPPVSISRIARLMKGKTQIAVVVGKITDDIRMTEIPKLRVCALKFTETARARIEKFGGECMTFDQLAMLKPTGSNTVLIRGVRNSREAVKHFGAPGVPNSNAKPYVRSKGRKFERARGKRSS
PF00828	Stet_Breviatea	YLMLLVKLYRFLARRTNSKFNEVVLKRLYMSRVNRPVVSVSRIARFMKGKDDKQIAVVVSKITDDLRMEEMPKLRICALRFTESARARIEKAGGECLTFDQLAMLRPTGANTVLIRGQKKTREAVKHFGAPGVPHSHAKPYTRSKGRKFEMARGRRHS
PF00828	Pbif_Breviatea	MGIDIAHHHVKNKNRVAAKSNDPYLLLLVKLYKFLARRTEASFNKVVLKRLMMSRMHRPCMSVSRVARLMKNGSEEQIAVVVASVTDDVRMVDLPKLKICALRFTESARARIIKAGGECLTFDQLAVRRPTGKNTLLLRGEKTAREANKHFGAAGVPNSTTKPYIRAKGRKFERARGRRASRGYKN
PF00828	Mcir_FungiZyg	GIDLKKHHVKNSNRTAPKSDNVYLALLVKLYRFLARRTDANFNKVVLKRLFMSRVNRPPVTVSRIVKNNKEGKTVVVVGSVTDDSRLLDLPKLSVAALHFTKTAKARILKAGGEVLTLDQLALRAPTGANTILVRGAKNSRESVKHFGMGPHKNKKPFVRSKGRKFERARGKRASRGFK
PF00828	Rory_FungiZyg	MGIDLKNHHVKNSNRTSPKSNNVYLALLVKLYRFLSRRTDAEFNKVVLKRLFMSRVNRPPVTVSRIVRNAKDNKTVVVVGTVTDDSRLLELPKLSIAALHFTKTAKARILKAGGECLTLDQLALRAPTGSNTILIRGAKNARESVKHFGFGPHKNKKPYVRSKGRKFERARGKRASRGFK
PF00828	Rirr_FungiZyg	MGIDIKKHHVRXKNRTAPKSEDVYLRLLVKIYRFLARRTNSKFNSAILKRLFMSRINRPPMSISRIVRNLSNKPGKTAVIVGTVTDDNRVLEVXKLSVAALRFTKTAKARILKAGGEVLTLDQLALRAPTGSNTVLLRGSKNSREAVKHFGMGPHKHAKPYVGSKGRKFEKARGRRASRGFK
PF00828	Mver_FungiZyg	MGIDIKKHHVRNKNRQAPKSEDVYLLLLVKLYRFLARRTDSAFNKVVLKRLFMSRVNRPPMSVSRVARNMAGKEGKTAVVVGTVTDDNRFLEVPKLSIACLRITKTAKARVLKAGGEVITFDQLALRAPTGANTVLLRGKKNTREAVKHFGMGPGKHAKPYVQSKGRKFEKARGRRASRGFK
PF00828	Pisp_FungiNeo	MGIDIQKKHVKNSNRSAPKSNDVYLLLLVKLYRFLARRTDAAFNKVVLKRLFMSRINKPPMTLSNIAKNMANKEGKIAVVVGTVTDDSRMFEVPKMTICALRFTKTARAKILKAGGECLTFDQLALRAPTGTNCVLLRGKKSHREAVKHFGKAPGVPKSDTKPYVRSKGRKFEKARGRRSSRAFR
PF00828	Umay_FungiDik	GIDIAKKHVKNGQRTAPKSQDPYLLLLVKLYRFLARRTDSRFNKAILRRLYMSKINQPPVSVSRVIYLTKSQGGVAASASETPKTVVVVGTITDDNRVLELPKLSVAALRFTNTARARIEAAGGECLTLDQLATRAPTGSNTVLIRGQKNAREAVKHFGFGPHKNKKPYIRSKGRKFEKARGRRASRGFK
PF00828	Crev_FungiZyg	MGIDIANKHVKSKNRTAPVSENVYLLLLVKLYRFLARRTDSNFNKVVLKRLYMSRINRPPVSLSRLVALTKNATAKTAVVVGSITDDERLEVVPKLSVAALHVTKTARARILNAGGEILTLDQLALRAPTGTNCILLRGKRNSREAVKHFGRGPGTPHSHTKPYVRSKGRKFERARGRRASRGFRN
PF00828	Gpro_FungiChy	MGIDIAKKHVKKGARSAPKSENVYLLLLVKLYRFLARRTADAPFNKVVLKRLFMSRVNRPPLSISRLAYLMKGKEGKTAVLIGTVTDDARLEEVPKLSVAALRFTQTARARITAAGGECLTLDQLALRAPEGSGCVLLRGKKNAREAVKHFGPAPGVPNSSTKPYIQSKGRKFERARGRRKSRGYK
PF00828	Ccor_FungiZyg	MGIDIAKHHVRNKNRKAPRSTNVYLSLLVKLYRFLARRTESDFNKVVLKRLFMSRIHRPPVSISRVVKLSANSADKTVVIVGTITNDERLSEVPALKVCALRFTRTARARIVQAGGECLTFDQLALRAPTGANCLLLRGKKNSREAVKHFGAAGVPKSHAKPYVRSKGRKFERARGRRASRGYKN
PF00828	Sdes_IchthyosporeaDermocystida	MGIDIRKHHVKKQCRVAPKSQNVYIRLLVKLYRFLARRTGSNFNKIVLKRLFMSRINRPPISVSRIARLVKGKENKIVVLIGSVTDDSRLLELPQLKICALRFTESARARIVKAGGECLTFDQLALRSPTGNNTLLLRGKKNSREACKHFGLAPGVPHSHSKPYIRSKGRKFERARGRRKSRGYK
PF00828	Colp12	MGIDIDRKHAKKGHRTEPKTDDVYIRLLVKLYRFLARRTGSEFNKVVLKRLFMSRINRPPISVSRLARFLKGKDEKSIAVVVGTILDDERVLELPKLKVCALRVTESARARITKAGGEVLTFDQLALRAPTGANCLLFRGQKNARESVKHFGRAPGVPNSNTKPYVRSKGRKFERARGRRKSCGY
PF00828	Bden_FungiChy	MGVDLQKKHHQKKGARVAPKSDNVYLRLLVKLYRFLARRTNSKFNQVVLKRLFMSRVNRPPISISRLSKYLSGKENKIAVVVGTVTDDNRLLEVPKISVAALRVTNSARARILKAGGEILTFDQLALRSPLGKGTVLLRGPKNSREAVKHFGTPGKPGSTAKPYVRSKGRKFEKARGRRASRGYK
PF00828	Spun_FungiChy	GVDLGVRHHQKKGHRDAPKSQDVYLRMLVKLYRFLARRTESKFNQVVLKRLFMSRVNRPPISVSRLARFMKGKEDKIAVIVGTVTDDNRLLEVPKLTVAALRVTRTARARIIKAGGEILTFDQLALRSPLGKGTVLLRGQRNTREAVKHFGVPGKPHSSAKPYVRSKGRKFERARGRRKSRGYK
PF00828	Rall_FungiCry	MGIDIDRHHVKKNRRVAPKSEDPYLLLLVKLYRFLARRTGAKFNNIILKRLFMSRINRAPMSLSGVAKQMSGQEDKIAVLVGTVTDDVRLLEFPKLTIAALRFTKTARARIVKAGGEAITLDQLALRSPTGEKTVLLRGKKNAREAVKHFGIPGQPGSHVKPYVRSKGRKFEKARGRRASKGF
PF00828	Bflo_Metazoa	MGIDIDHRRDRRVRRKEPKSEDIYLRLLVKLYRFLARRTNAKFNQVVLKRLFMSRTNRPPMSIARLIRLMKKPGREGKTAVVVGTITDDVRIFEIPKLKICCLRVTEGARAKILKAGGEIITFDQLALRSPKGKNTVLIQGQRRARETCRHWGRAPGAPHSHTKPFVRSSGRKFERARGRRKSCGYK
PF00828	Ctel_Metazoa	RKVVRKAPKSEDVYLRLLVKLYRFLARRTDAKFNKIILKRLFMSRTNRAPLSIHRLVRLMKKPGRENKVAVVVGTITNDVRIFEIPKMKVCALHVTEEARARIIKSGGEIMTFDQLALKAPKGQRTVLVQGPRSQRESQKHFGAAPGLPHSHSKPHVRSKGRKFERARGRRASRGY
PF00828	Dpul_Metazoa	MGIDINHKYDRKVVRREPRSEDVYLRLLVKLYRFLARRTKAKFNRIILKRLFMSRINRPPLSVSRLSRHMKKAGREGKIAVVVGTLTDDPRIFKIPKLTVCALRATERARARILKAGGHVLTFDQLALRAPTGKNTVLIQGRRKAREANKHFGPAPGVPGSHTKPLVRSKGRKFERARGRRSSCGYK
PF00828	Skow_Metazoa	MGIDLNHRNLRKVHRKKPRSKDVYLRLLVKLYRFLARRTGAKYNMIVLKRLFMSRANRQPMSIARVTRQMKKPGRDNKTAVIVGTVTDDLRIFQIPKLKICALHVTEGARSRVLKSGGEIITFDQLALRSPRGQNTVLLQGPRKSRKAYRHFGKAPGVPNSHTKPFVRAKGRKFEKARGRRASRGFKN
PF00828	Xtro_Metazoa	MGVDIRHNKDRKVRRKEPKSQDIYLRLLVKLYRFLARRTNSSFNRVVLKRLFMSRTNRPPLSLSRLIRKMKLTGRENKTAVVVGCITDDVRIHDIPKLKVCALKMTGGARSRILKAGGQIMTFDQLALAAPKGQNTVLLSGPRKAREVYRHFGKAPGTPHSHTKPYVLSKGRKFERARGRRASRGYKN
PF00828	Hmag_Metazoa	MGIDINHRYDKKKRRTEPVSQDPYLRLLVKLYRFLARRTSSKFNQVVLKRLFMSKINRPPVSISRIARRMKKPGCEDKICVVVGTITDDIRLIEVPKLKVCALRLTEGARTRILKSGGEVITFDQLALRSPTGKKTVLLQGPRKSREACKHMGRAPGVPHSTTKPYVRSKGRKFERARGRRASCGYK
PF00828	Lgig_Metazoa	LYRFLARRTSAGFNKVVLRRLFMSRMHRPPIALSRLVKYATKPGREGRIAVVVGTITDDVRLMSCPKLTVCALRVTERARARILKAGGEILTFDQLALRAPKGQNTVLVQGIRQARGANRHFGLAPGVPGSNTKPLVRAKGRKFEKARGKRNSRGY
PF00828	Mbre_ChoanoflagellataCraspedida	MGIDIRHHHAKKGRRTAPESEDPYLRLLVKLYRFLARRTESSFNKVVLRRLFMSRINRPPLSLSKLMTHMKKQESKIAVIVGTVTDDVRVIEVPKLTVCALRVTESARKRILAAGGEIMTFDQLALRAPTGQNTVLLQGPRKSREAVKHFGAPGVPHSHVKPYVRSKGRKFEKARGRRASRGYK
PF00828	Sros_ChoanoflagellataCraspedida	MGKDICHKHDRKRRRTAPVSEDPYLRLLVQLYRFLVRRTNSSFNKVVLKRMFMSKIHRPPMSLSRIVQNMKGREQLIAVIVGTVTDDPRMLELPKLTVCALRFSETARKRILAAGGECLTFDQLALRSPKGQNTVLMQGPRKAREAVKHFGRAPGLPGSHARPYVRAKGRKFEKARGRRASRGYK
PF00828	Cowc_Filasterea	GIDIKYKHLKKKVRTEPKSEDLYIRLLVKLYRFLARRTDSPFNKVVLKRLFQSRIHRPPLSLSKLVRLTKGSEKLTAVVVGTVTDDERLHVVPKLTVCALRFTAAARARILKAGGETITFDQLALRSPTGKNTLLLRGPVKSREAVKHFGAAPGVPKSTTKPYVRSKGRKFEKARGRRASRGYK
PF00828	Mvib_Filasterea	MGIDIKRKHKKKGARTAPKSEDVYLQLLVKLYTFLSRRTESTFNKVVLKRLYQSRSNRPPVSVSMLKKLLKGDEKRVAVVVGTITDDERLLEVGKMRVCALRFTQGARARITNAGGECLTFDQLALLSPTGKNTVLLRGKRNAREAVKHFGPAPGVPHSTARPYVRSKGRKFERARGRRASRGYK
PF00828	Awhi_IchthyosporeaIchthyophonida	MGIDLKAKHVKNRNRVAPKSENVYVLLLVKLYRFLARRTDSDFNKAVLKRMYMSRSNRPPLSLSKVVKFMASKEGKTAVIVGSVTDDVRLQNVPKLSVCALRFTAGARARIVKAGGECITFDQLALRLPTGSGAVLLRGPRKAREVYKHFGRAPGVPNSTAKPYVRSTGRKFEKARGRRASRGYK
PF00828	Pgem_IchthyosporeaIchthyophonida	MGIQIKHKHQKNTNRVAPKSENVYVLLLVKLYRFLARRTDSDFNKVILKRLFMSRSNRAPLSVSKVTKFLKGKEGKTAVIVGSVTDDVRTETLPKLSVCALRFTAGARAKILKNGGECITFDQLALRAPKGQNCVLLRGPRKAREVYKHFGKAPGVPNSTARPYVRSTGRKFEKARGRRASRGFK
PF00828	Cfra_IchthyosporeaIchthyophonida	MGIDLDHRHLKKNNRLAPKSENVYVLLLVKLYRFLSRRTESEFNKTILKRLYMSRVNRPPLSVSKLTRFMKTKEGKTAVIVGTVTDDKRIEKIPALTVCALRFTAGARARIVKAGGECITFDQLAMRSPTGANTVLLRGPRMSRETVKHFGAPGVPHSSAKPYVRSKGRKFEKARGRRQSRGFKV
PF00828	Sarc_IchthyosporeaIchthyophonida	LDHRHLKKNNRLAPKSENVYILLLVKLYRFLSRRTDSDFNKTILKRLYMSRVNRAPLSVSKLTRFMKGKEEKTAVIVGTVTGDSRIETIPKMTVCALRFTADARVRIVKAGGECITFDQLAMRAPTGTNTVLLRGPRKSREAVKHFGAPGVPHSHAKPYVRSKGRKFE
PF00828	Apar_IchthyosporeaIchthyophonida	MGIDLDHRNKKKSNRTAAASKNVYVTLLVKLYRFLARRTDSKFNKVILKRLFMSRMNRPPLSLSKIARLAKGKDGKTVVVVGTVTDDKRMLDAPKGLKVCALRFTASARARIVKAGGETLTFDQLALRHPHGQNCLLLRGPRNSREANKHFGAPGVPNSSAKPYIESKGRKFERARGRRKSRGYR
PF00828	Ihof_IchthyosporeaIchthyophonida	MGIDLDHRATKKSNRTAPESKNVYLLLLVKLYRFLARRTDSKFNKVILRRLFMSRMNRPPLSLSKIARMAKGKDSKTIVIVGTVTDDKRIAEIPAGVKICALRFTSAARARIQKAGGETMTFDQLALRHPYGQKCLLLRGPRNSREANKHFGAAGVPDSKAKPFVESKGRKFEKARGRRRSRGYK
PF00828	Ihou_IchthyosporeaIchthyophonida	LSKLYRFLARRTDSKFNKVILRRLFMSRMNRPPLSLSKIARMAKGKDSKTIVIVGTVTDDKRIAEIPAGVKICALRFTSAARARIQKAGGETMTFDQLALRHPYGQKCLLLRGPRNSREANKHFGAAGVPDSKAKPFVESKGRKFE
PF00828	Dcos_ChoanoflagellataStephanoecidae	MGIDLDHRNLRKAKRSAPKSEDPYIRLLTKLYRFLSRRTDSNFNKIVLKRLFMARSKRQPLSLSKIARQMAKTEGKIAVVVGTVTDDIRMLEVPKLSICALRVTAGARARILKAGGEVITIDQLALKAPTGANTILLQGPRKSREAQKHFTGGKLGAPGTPGGGVKPFVRSKGRKFERARGKRSSRGFRN
PF00828	Hnan_ChoanoflagellataAcanthoecidae	MGIDIDHRHLRKARRSAPKSEDPYLRLLVKLYRFLARRTDSKFNAVVLQRLFISRSKKQPLSISKIARQMATGGSNGGKIAVCVGTVTDDVRFLAVPKLSVCALRITEGARARILKAGGEILTFDQLALRSPTGENTVLLQGPRKSREAQKHFGACGVKGGGVKPFVRSKGRKFEKARGRRSSRGFKN
PF00828	Spom_FungiDik	MGIDIERHHVKKSQRSKPASENVYLKLLVKLYRFLARRTDSRFNKAILKRLFQSKTNRPPISISKIAALTSRKSASSQNKTTVVVGTVTDDERMLTVPKLSIAALRFTKSARARILKAGGEVLTLDQLALRAPTGSNTVLVRGKKHAREAYRHFGFGPHKHKAPYVRSEGRKFERARGRRKSRAFK
PF00828	Adig_Metazoa	RREPVSKNVYLKLLVKLYSFLARRTKSKFNQIIMKRLCFSRVNRPPMSLSRLVKNMKARGDHEKLTCVVVGTVTDDLRLYDIPKLKVCALRVTAGARARILKAGGEVITFDQLALRPPRGKXXXXXXXPXKXRESVKHFGPAPGVPHSHTKPYVRSKGRKFERARGRRKSRGYK
PF00828	Nvec_Metazoa	MGIDIEKKHPKKNYRREPVSQNVYIRLLVKLYRFLSRRTNAKFNQIVMKRLCMSRTKRPPLSLARLVRKMKASGHKDKICVVVGSITDDKRIFEVPALKICALRFSETARARILKAGGEILTFDQLALRAPLGQNTVLLQGPRKAREAERHMGLAPGVPHSDTKPFVRSKGRKFERARGRRKSRGFK
PF00828	Tadh_Metazoa	MGVDLDHNKFKKTVRKEPQSNNVYIRLLVKLYRFLARRTESPFNKVVLKRLFMSRRHRAPISIARILRKMKSYDSNKITVVVGTVTNDIRVLNLPKMKICALHVTEGARERILKAGGEILTFDQLALRAPKGQNTVLLQGPRHAREAQKHFGPAPGVPHSHAKPYVRSKGPKFERARGRRRNCGYRS
PF00828	Clim_Corallochytrea	MGVDCGYGKKRKHQRDGRRTAPKSEDPYLKLLTKLYGFLARRTDSKFNQIVLRRLFMSRINRAPVSIARLGRHMRGKEGKIAVVVGKVTDDHRIEAAPKVTLCALKVTETARKRLLAAGSEIITFDQLALRAPKGSNCVLLQGPRTHREAVRHFGAPGTPHSSAKPFVRAKGRKFEKARGRRKSRGFKV
PF00828	Clii_Corallochytrea	MGVDCGYGKKRKHQRDGRRTAPKSEDPYLKLLTKLYGFLARRTDSKFNQIVLRRLFMSRINRAPVSIARLGRHMRGKEGKIAVVVGKVTDDHRIEAAPKVTLCALKVTETARKRLLAAGSEIITFDQLALRAPKGSNCVLLQGPRTHREAVRHFGAPGTPHSSAKPFVRAKGRKFEKARGRRKSRGFK
PF00828	Aque_Metazoa	MGIDIDHRNKRKVYRRGPKSNDVYLKLLVKLYRFLVRRTKSPFNRVVLKRLYMSRTNRPPLSLSRLVMQMKKPDRSEKTAVVVGTVTNDHRQWKVPKMTVCCLKVTEQARARIEKSGGEIITFDQLALRAPRGQNTILLQGPRKAREAVKHFGTPGVPFSHSKPYVRSKGRKFEKARGRRKNHSY
PF00828	Ocar_Metazoa	MGKDIDHRKQRRVVRRDTKSKSGYVQLLVKLYRFLERRTDSSFNKVVLKRLYMSRKNRPPVSISRLTKQMEKGDRTEKVAVIVGTITDDVRQLDVPKLKVCALRFTAGAHARIVKAGGECITFDQLALMSPKGQNTVLLQGPRKAREAERHFGRPPGTPHSHTKPYVRTKGRKFEKA
PF00828	Mlei_Metazoa	MGIDINHKKDRKVHRKEPVSQNVYLRLLVKLYRFLSRRTNAKFNQVILKRLFMSRQNRPAISLARIVRQMKLKQREGKTVVVVGTITDDKRIFDVPKLKVCALRLTEGARSRIIKAGGSVITFEQLAVEAPLGQNTIIMQGRRTRREANRHFGAPGLPNSHAKPFVRLRSRNHEMARGRRKSRAYK
PF00828	Cneo_FungiDik	MGIDIRRHHVKKGNRSAPKSEDPYLLLLVKLYRFLARRTDSKFNRVILKRLFMSKINRPPISLSRIVKETKNSNPDNSKTVVVVGTILDDERLPEVPKLSIAALRFSTAARERITAAGGEALTLDQLALRAPTGSNTVLLRGKRNVREAVQHFGGPLKGGRPYVASKGRKFEMARGRRKSRGFK
PF00828	Nspp_Discicristoidea	MGIDIVGRKHKPRSNRVHPESKNVYLALLVKLYRFLARRTDSAFNKTVLKRLFMSKMNRAPLSLSKLVKNMAGKETKIAVVVGTVTDDVRIETVPKLTVCALRFTKAAHTRIVNAGGSVMTFDQLALKAPTGANTVLLRGPRNAREAVSHFGAPGVPGSHAKPYTSGKKGRKNEAARGRRNSRGWK
PF00828	Amac_FungiBla	GIDIQRHHVKKTQRKEAASGNPYLLLLVKLYKFLARRTDSAFNKTILARLVKSKIYKPPVSLSKIALNMKGKEDKIAVIVAPVTDDVRLTAFPKLTVAALKFTASARARIVKNGGEAITIDQLALRAPTGSNTVLLRGSRMREAVKHFGKAPGTSKSSAKPYVRSKGRKFERARGRRASRGYKN
PF00828	Cang_FungiBla	MGIDIKNHHVKKTQRREAASRNPYLLLLVKLYKFLTRRTDSGFNKVVLQRLVKSKIYKPPVSLSKLSVSMKGREDKIAVVVGPITDDNRFHEVPKLTVAALRFTESARARIVKAGGECLTLDQLALRAPTGANTVLLRGSRQRVALKHFGKAPGTPGSTARPYIRSKGRKFERARGRRASRGYRN
PF00828	Falb_Discicristoidea	IKHNKSSRRKAPKSQNAYLALLVKLYRFLARRTESNFNAVVLRRLYASRVNRPSMSLSKLAKFVEGKEATAVLVGTVTDDVRMVDVPKVTVCALHVTKTARARIVAAGGEVLTFDQLAIRAPTGKNTLLLRGKTSTREANKYFSPGAGSHAKPITLSKGRKFEKARGRRHSRGFK
PF00828	Ttra_Apusozoa	LGIDLKAGGRNTKTKRTAPKSVDPYLGLLVDLYRYLARRTGSKFNATVLKRLFKSRSNMPPVSISRIARYMKGKEDQIAVLVGTILDDERMEEVPKLTICALHFSESVRARIVAAGGTCMTFDELAIARPTGSNCILLRGQLSARKANKYFGRAPGVPNSSTRPFVRSKGRKFEKARGRRASRGFVN
PF00828	Ddis_Amoebozoa	MAIDKSKRFLRKTGRKTLVSQNPYHALLVKLYRFLARRTNSKFNKVVLKRLLQTKTNRPPVSISRIANLMKDRKSGKIAVCVGTVVDDERLLDCPKLTVCALRFTETARSRIVKAGGKALSFDQFALVRPRGNNTFLIKGVTKAREVYKHFGRAPGLPGSHARPYVRSEGIKFQRSKTR
PF00828	Ppal_Amoebozoa	MAVDRSHRFARKTGRKTLVSKNPYLSLLVKLYKFLARRTGSKFNKIVLRRLIQTRSNKIAVSISRIANAMKDRKAGKIAVVVGSVVNDERLLDVPALTVVALKFSESVRARIVKAGGKALTFDQFALIRPRGNNTFLLKGVVKARTVYKHFGRAPGLPGSTARPYVRAQGRKFEQAR
PF00828	Mber_Apusozoa	MGIDLKAGGRVKNKSRSEPKSEDVYIRLLVKLYRFLARRTNSSFNKVVLKRLFMSRTNRPPMSVGKIGRMTKGQADGKIICVVGTVTNDIRITGETMPALNICALRFTEGGGAKIGGGGGAWVTFDQLGLQRPTGKNTILLRGRRNARTAARYFGLAPGVAGASTRGRV
PF00833	Acas_Amoebozoa	GRVRTKTVKKAARLMIEKYYPRLTLDFDTNKKICDEVAAIPSKRLRNKIAGFVTHLMKRIKKGPVRGISFKLQEEERERKDNYVPDVSALQVDLIEVDSDTKDMLRSIGLGDLAGVQV
PF00833	Bden_FungiChy	MGRVRTKTVKKASRVLIEKYYPRLTLDFQTNKKICSEVAIIASKRLRNKIAGFTTHLMKRIQRGPVRGISFKLQEEERERKDNYVPEVSALVVDTIEIDADTSALLKALGFESLPGVVLPDPSTAV
PF00833	Spun_FungiChy	MGRVRTKTVKKAARVIIEKYYPRLTLDFQTNKKIADEVAIIASKRLRNKIAGFTTHLMKRIQRGPVRGISFKLQEEERERKDQFVPEVSALAVETIEIDPDTNALLKALNMENIPGLQV
PF00833	Ccor_FungiZyg	MGRVRTKTVKKASRVLIEKYYPRLTLDFHTNKRIADEVAQIPSKRLRNKIAGFTTHLMKRIQRGPVRGISFKLQEEERERKDNYVPEVSALALSTIEVDSDTKDLLKSLNFENIPGVQ
PF00833	Mver_FungiZyg	MGRVRTKTVKKASKVLIEKYYPRLTLDFQTNKKIASEVAIIPSKRLRNKIAGFTTHLMKRIQRGPVRGISFKLQEEERERKDNYIPEVSALDISAIEIDTETQNLLKSLNFEELSGVTAVEVKQTPVETRRPRG
PF00833	Mcir_FungiZyg	MGRVRTKTVKKASRVVIEKYYPRLTLDFQVNKKILDEVSIIQSKRLRNKIAGFTTHLMKRISRGPVRGISFKLQEEERERRDNYVPEFSALDTSLIEVDPETKELLKAINFE
PF00833	Rory_FungiZyg	MGRVRTKTVKKASRVVIEKYYPRLTLDFQVNKKILDEVTIIQSKRLRNKIAGFTTHLMKRISRGPVRGISFKLQEEERERRDNYVPEFSALDTSAIEVDPETKELLKAINFENLPGVQVTNP
PF00833	Amac_FungiBla	MGRVRTKTVKKASRVMIEKYYPRLTLDFQVNKKIASEVASISSKRLRNKIAGFTTHLMKRIQKGPVRGISFKLQEEERERKDNYVPEISALEQGSIEIDQETAALLQSLDIKINNTSVKTVT
PF00833	Cang_FungiBla	MGRVRTKTVKKASRVMIEKYYPRLTLDFQSNKKVASEVASISSKRLRNKIAGFTTHLMRRIQKGPVRGISFKLQEEERERKDNYVPDVSALEQNELVVDTETAALLSSLDI
PF00833	Crev_FungiZyg	MGRVRTKTVKKASRVLIEKYYPVLTLDFHTNKRICDDVAIIASKRMRNKIAGFTTHLMKRIQKGPVPGISFKLQEEERERKDNYVPDQSALDISAIEIDPETESMLKALNFEKLPGISVAAP
PF00833	Rall_FungiCry	GRVRTKTVKRASRVLIEKYYPRLTLDFQTNKRICDEVAVISTKRLRNKIAGFTTHLMKRIQKGPVRGISFKLQEEEREKKDNYVPEISALDTSSIQIDSTTEELLKSMGIENLTGVSVVQEEI
PF00833	Pbif_Breviatea	MGRVRTKTVKKAAKLVIEKYYTRLTLDFQTNKRVCEEIAAIPSKRLKNKIAGYVTHLMKRMVHGPVRGISVKLQEEERERRDNYVPEVSAVAIDMIEVDADTKEMLAAINFGDMANV
PF00833	Adig_Metazoa	RVCDDIAIIPSKKLRNKIAGFVTHLMKRIQKGPVRGISIKLQEEERERRDNYVPEVSAIELDMIEVDPDTKEMLKVLDFG
PF00833	Ocar_Metazoa	MGRVRTKTVKKASRVIVEKYYTRLTLDFHTNKRICEEIAIIPSKRLRNKIAGFVTHLMKRIQKGPVHGISIKLQEEERERRDNYVPEVSAIEIDPIEIDPDTKEMLKVLDFGDIPGLQIVTP
PF00833	Bflo_Metazoa	MGRVRTKTIKKAARVIIEKYYTRLTLDFHTNKRICEEIAIIPSKKLRNKVAGFVTHLMKRIQRGPVRGISIKLQEEERERRDNYVPEVSAIDQDIIEVDPDTKEMLKSLDFGNISGLQVTQPVGVPGFRAPKNP
PF00833	Nvec_Metazoa	MGRVRTKTVKKAARVIIEKYYTRLTLDFHTNKRVCEEIAIIPSKKLRNKIAGFVTHLMKRIQKGAVRGISIKLQEEERERRDNYVPEVSALEQELIEVDPETKEMLKVLDFGGIPNLQVTQPITATQNFR
PF00833	Hmag_Metazoa	MGRVRTKTVKKASRVIIEKYYTRLTHDFHTNKRICEEIAIIPSKKLRNKIAGFITHLMKRIELGPVRGISIKLQEEERERRDNYVPEVSALEQEVIEVDPYTKEMLKVLDFADIPNLQVTQP
PF00833	Aque_Metazoa	MGRVRTKTVKKASRVIIEKYYTRLTLDFHTNKRVCEEIAIIPTKRLRNKIAGFVTHLMKRIQKGPVRGISIKLQEEERERRDNYVPDVSALEKEILEVDPDTKEMLKFLDFGSIPNLQVVQPPV
PF00833	Xtro_Metazoa	MGRVRTKTVKKAARVIIEKYYTRLGNDFHTNKRVCEEIAIIPSKKLRNKIAGYVTHLMKRIQRGPVRGISIKLQEEERERRDNYVPEVSALDQEIIEVDPDTKEMLKLLDFGSLSNLQVTQPTVGMNFKTPRGAV
PF00833	Skow_Metazoa	MGRVRTKTIKKAARVIIEKYYTRLTLDFHTNKRVCEEIAIIPSKKLRNKIAGFVTHLMRRIQRGPVRGISIKLQEEERERRDNFVPDVSALEQDIIEVDSDTKEMLKVLDFGSITNLQVTQPITPGVSFRGPR
PF00833	Sdes_IchthyosporeaDermocystida	MGRVRTKTVKKAARVIIEKYYTRLTLDFHVNKRVSEEIAIIPSKRLRNKIAGFVTHLMKRIQRGPVRGISIKLQEEERERRDNYVPEVSALEAELIETDADTKAMLKEMDFANLPGLNTTH
PF00833	Nk52_Ichthyosporea	MGRVRTKTVKKAARVIIEKYYTRLGLDFHVNKRICEEIAIIPSKRLRNKIAGFVTHLMKRIQQGPVRGISIKLQEEERERRDNFVPEISALEMDVIETDPDTKAMLKEMDFANLPGLSVSAP
PF00833	Lgig_Metazoa	MPSVRTKTIKKASRVIIEKYYMKLTTDFHVNKRICDEIAIIPSKKLRNRIAGYCTDLMKRIAKGPVRGISIKLQEEERERRDNYVPDVSAIDQDLIEIDPDTKEMLKAMDFANIPNLQVVQP
PF00833	Clii_Corallochytrea	MGRVRTKTVKKAARVIIEKYYTRLTLDFHTNKRIAAEIAVIPSKRLRNKIAGFVTHLMKRIQKGPVRGISIKLQEEERERRDNYVPEVSALEQDVIEVDAAVKNLLKDMDMDNLPGVEEKKP
PF00833	Tadh_Metazoa	MGRVRTKTVKKAARVIIEKYYTRLTFDFHTNKRICEEVAIIPSKKLRNKIAGFATHLMRRIQRGPVRGISIKLQEEERERRDNFVPEVSELAQEVIEVDSDTRDLLREMNVMDDITNLQVVQP
PF00833	Colp12	MGRVRTKTVKKAARVIIEKYYTRLTLDFHTNKRVCEEIAIIASKRLRNKIAGFVTHLMKRIQVGAVRGISIKLQEEERERRDNYVPEVSAIDLEVLEVDPDTKAMLEKLELAIPSNLQETAP
PF00833	Mvib_Filasterea	MGRVRTKTIKKAARVIIEKYYTKLGKDFHTNKRICDEIAVIPSKRLRNKIAGFMTHLMKRIEKGAVRGISIKLQQEERERRDNYVPEVSALEQDTITIDPETKAMLAEMDMRDLKGLNV
PF00833	Ctel_Metazoa	MGRVRTKTIKKASKVMIEKYYPRLTHDFHTNKRIVEEIAIVPSKKLRNKIAGFITHLMKRIQKGSVRGISIKLQEEERERRDNFVPETSAIDCDIIEVDIDTKEMLKMLDMANLPGLQVTQPIVSGPGFRPQG
PF00833	Cowc_Filasterea	MGRVRTKTVKKASRVIIEKYYPRLTLDFHTNKRVVNEIAIIPTKPLRNKIAGFVTHLMKRIQRGPVRGISIKLQEEERERRDNFVPERSAIDLDTIEVDADTQAMLREMNFGSLPRVAVS
PF00833	Mlei_Metazoa	MGRVRTKTVKRASRLIIEKYYTRLTLDFHTNKRIAEEIAIIPSKRLRNKIAGFVTHLMKRIQKGPVRGISIKLQEEERERRDNYVPETSALELESIGIDTDTNEMLKLYDFKGLKNITVESNT
PF00833	Pisp_FungiNeo	MGRVRTKTVKKASRVLIEKYYPRLTLDFQTNKKICDEVAVIPSKRLRNKIAGFTTHLMGRIQRGPVRGISFKLQEEERERKDQYVPDVSALEKQVEIDEDVEALLKAMGMEDIPNVVVGQKYAPTQSERVGANYK
PF00833	Spom_FungiDik	MGRVRTKTTKRASRVVIEKYYPRLTLDFQTNKRIVDEVAIIASKRLRNKIAGYTTHLMKRIQRGPVRGISFKLQEEERERKDQYVPEVSELEVDRVNVDQDTKDMLKSLGYDQIPVRVLAPA
PF00833	Umay_FungiDik	HGRVRTKTTKRASRVLIEKYYPRLSNVDFHQNKRVIDEVAIIPSKRLRNKIAGFTTHLMKRIQRGPVRGISFKLQEEERERKDQYVPEVSALDTSAPGSLEVDPDTKDMLRSFGFDSLPVTVTAPVTAYQAPERRG
PF00833	Ttra_Apusozoa	MGRVRNKTVKKAARQIIEKYYARLTLDFQVNKRICDEVAIIPTKRLRNKIAGFLTHLMRRIQKGPVQGISFKLQEEERERKDNYVPDVSEIALDVIEIDADTQDMLRQLNFGNMSEVVINK
PF00833	Cfra_IchthyosporeaIchthyophonida	MGRVRTKTVKRAARSIIEKYYTLLTLDFHTNKSIAEEVASIPSKRLRNKIAGFITHLMKRIQKGPVRGISIKLQEEERERRDQYVPEISALEPVDGSIEVDAETQQMLKDMKYGGLDMLRVAQVLPGSFQA
PF00833	Sarc_IchthyosporeaIchthyophonida	MGRVRTKTVKRAARSIIEKYYTLLTLDFHTNKSIAEEVASIPSKRLRNKIAGYVTHLMKRIQKGPVRGISIKLQEEERERRDQYVPEISALEPVDGSIEVDAETQAMLKDMKYGGMVNVVQIHP
PF00833	Ihof_IchthyosporeaIchthyophonida	MGRVRTKTVKKAARVIIEKYYTRLTLDFHTNKKISEEVALIPSKRLRNKIAGFITHLMKRIQKGPVRGISIKLQEEERERRDLYVPDVSALDAENGIEVDDQTKNMLADMGFGGM
PF00833	Ihou_IchthyosporeaIchthyophonida	GRVRTKTVKKAARVIIEKYYTRLTLDFHTNKKISEEVALIPSKRLRNKIAGFITHLMKRIQKGPVRGISIKLQEEERERRDLYVPDVSALDAENGIEVDDQTKNMLADMGFGGM
PF00833	Awhi_IchthyosporeaIchthyophonida	MGRVRTKTVKKASKVIIEKYYTRLTLDFHTNKRICEEIADIPSKRLRNKIAGFVTHLMKRIEKGPVHGISIKLQEEERERRDNYVPTISALEPTNGTIVVDEQTKTMLTAMNFGNMNGLSVVAT
PF00833	Pgem_IchthyosporeaIchthyophonida	MGRVRTKTVKKAARVIIEKYYTRLGNDFHTNKRVCEEIAIIPSKKLRNKIAGYVTHLMKRIQRGPVRGISIKLQEEERERRDNYVPTISALEPLNGEIEVDTATQTMLEAMNFGNMQGLKVNHADRQSRFRNNNN
PF00833	Cneo_FungiDik	MGRVRTKTVKRSSRILIERYYPRLTLDFHSNKRILDEVATVPSKRLRNKIAGFTTHLMKRIQKGPVRGISFRLQEEERERKDQYVPEVSALAASEESPLEVDAETKDLLKSLGMDDLSVNVINVS
PF00833	Dcos_ChoanoflagellataStephanoecidae	MGRVRTKTVKRVARQVIERYYTRLTLDFHVNKRICDEIAQIPSKKLRNKIAGFITHLMKRIQEGPVRGISIKLQEEERERRDNYVPDHSQLSPLDGEGIPCDAETKEMLKEMGFSELPHLVTAQP
PF00833	Hnan_ChoanoflagellataAcanthoecidae	MGRVRTKTVKKASRLIIERYYTRLTLDFDTNKRICDEISKIPSKKLRNKIAGFITHLMKRIQEGPVRGISIKLQEEERERRDNYVPDVSQLDPQDSGIQVDAETREMLRMMEFQNLPGL
PF00833	Mber_Apusozoa	MGRVRTNTVKKAAKFIIEKYYARLTLDFQVNKRICEEVAIIPSKRLRNKIAGFVTHLMKRIQKGPVRGISFKLQEEERERKDNYVPEKSEIDLEMIEVDEDTRAMLRALDLDVENIRVDPTLG
PF00833	Falb_Discicristoidea	MGRVRTKTVKKASRVLVEKYYPKLTLDFHTNKRIADEVAIIPSKRLRNKIAGFTTHLMKRIQRGPVRGISFKLQEEERERRDNWVPEQSAVNTDRVEVDAVTLKMLAAVFPGEVTGV
PF00833	Dpul_Metazoa	MGRVRTKTVKKAAKLIIEKYYTRLTLDFHTNKRICEEIAIIPSKPLRNKIAGFVTHLMKRLQHKTVRGISIKLQEEERERRDNYVPEQSVLDMDTIEIDSETKEMLKMLELEKIPKLHVVNPT
PF00833	Mbre_ChoanoflagellataCraspedida	MGRVRTKTVKRAARVIIEKYYTRLTMDFDTNKRLVEEYAIVPSKRLRNKIAGFITHLMKRIQKGPVRGISIRLQEEERERRDNYVPEVSALEPGEDGIVVDKETAEMLKALMPSLDVNVQAPGSN
PF00833	Ppol_Amoebozoa	VRTKTIKKAARIIVEKYYPRLTLDFQTNKRLADEVAIIPSKNLRNKIAGYVTHLMKRIQRGPVRGISFKLQEEERERKDNIVPEYSELDVLEIPVDQETKDLLRHLDFANIPGVTVNTP
PF00833	Sros_ChoanoflagellataCraspedida	MGRVRTKTVKKAAKVMIEKYYTRLTNDFETNKRLVEEFAIVPSKRLRNQIAGYVTHIMKRVQKGPVRGISIKLQEEERERRDNYVPEVSAIHADDTIPVDQDTFDMLQSIGYSTLDRLRVEGR
PF00833	Gpro_FungiChy	WGRVRTKTVKKASRVLIEKYYPTLTTDFQINKRRVAEVAIVASKRLRNKIAGFTTHLMKRIARGPVRGISFKLQEEEREKKDNYVPEVSALSVEGGIVVDKETQSLLKSLGFDDLPGISLAE
PF00833	Ddis_Amoebozoa	MGRVRTKTIKRASKLLIEKHYPRLTNDFDTNKRTCDKLAKIPSKRLRNKIAGFCTHLMRRIANGPVRGISYKLQEEEREKRDNYVPQESAIKTNEVKIDRDVEEMLKSTLEFPTIPQIHVVDQKRYNKNTKKSNK
PF00833	Ppal_Amoebozoa	MGRVRTKTVKRASKILIEKYYPRLTNDFDTNKRTCDEVAQIPSKRLRNKIAGFVTHLMRRIERGPVRGISYKLQEEERERRDNYVPSTSAIKTEKIHIDEDVHEMLKSTLGNFSSMTRIH
PF00833	Rirr_FungiZyg	MGRVRTKTVKKASKLIIEKYYSRLTXDFQTNKKICDEVAIXASKRLRNKIAGFTTXLMKRIQRGPVRGISFKLQXEERERKDNYVPEVSALSVETIEIDPDTKDLLKAMNFDNLSGVTVTAPVALN
PF00833	Stet_Breviatea	CAKLIIEKYYTKLTYDFHTNKRVCEEVAVIPSKRLRNKIAGYVTHLMKRMEKGPVRGISVKLQEEERERRDNWVPETSAVDIGNVEVDKVSMEMLKEIGFPEMEGVSIAR
PF00833	Apar_IchthyosporeaIchthyophonida	MGRVRTKTVKKAARNVIEKYYTRLTLDFHTNKRIAEEVAVIPSKRLRNKIAGFXTHXMKRIQXGPVRGISXKLQEEERERXDXYXPEVSALXXXXIEXDXXTXXXLXXXXFXXXXXXXXVEVKQTPVETRRPRG
PF00833	Nspp_Discicristoidea	TTHLMRRIQRGPVRGISFKLQEEERERRDNYVPETSAIKIDHIEVDPETKAMLKDNNFGSLSNIVDAAPPAPRDTKPERRTPRA
PF00940	Acas_Amoebozoa	LEPAFNHHQAMLRGKLTGFLGCHEQVLALMEHEEVQRGVMQARYMPMLVEPQPWVAPNQGGYLVARTQVLRAKGSRMQTEVLRSASMDKVYECLNLLSSTPWRINNRMHEVICEAWDNGGGIADLPSRTNLVRRLLLISVHTANEPLFSHLEVKQKFDRERKKAKIANYNLHSLRCDVTYKLQASSRGRTYPIPPHLNHLGQDLCRGLLTFAEGKPLGESGLRWLKVHLANVFGNDKITFEDRVRFVENNMEHIMDSASNPLGGQRWWLKADKPWQCLAASIELINAYNSGQPETYVSTLPIHQDGSCNGLQHYAALGGDEMGARQVNLLPSERPQDVYSGVVELVVRRLEDDAANGVEIAQRLLGKVDRKVIKQTVMTSVYGVTFIGARQQIENALKD…
PF00940	Ddis_Amoebozoa	PHKNIFKLIEAGHEIRETGGARLFPMVIKPLPWITPTEGPYLHYKVPIMRTNGSAMQLRTLVDSDMSLIYRALNILGETPWVINRDLYNVILEAWANGGNIGDIPKRTDFEYPEISDDMLFDHEARKELYKKEQRIKSLNFNLHSLRCDTNYKLEVARKFLDHTLYFPHNIDFRGRSYPIPPHLNHLGSDFCRSLLKFEKSLPLGEKGLEWLKIHVANLYGVDKIPLNERLAFTERNMENIFDSVDSPLNGNKWWLKADNPWQTLAACMELTKAIRSGKPAEFLSNLPIHQDGTCNGLQHYAALGGDVWGAEKVNLLPSDCPQDVYSSVAQLVEQIVEEDAKNGDEIAQFFLGKVDRKLVKQTVMTSVYGVTYIGAREQIENAILEKFSDLDLDEDFIF…
PF00940	Ppal_Amoebozoa	ITKVGSFMVKSIMDSCMINKYIDGEDIDEKVPAFYYKYRYNNNKKYGVISCHDNVYSLMDEGHFLVEAMNARLLPMVVPPQPWTHPNKGCYLQYPCFIMRTNGSKLQKTSLYQSDLTNIYEGLNVLGEVPWKTNEKMMSILLEAWEKGGGIADLPSRYDFELPESPSQEDLQDEKVKRDFNKKLRKVKGANNDLHSLRCDTLYKLNVAKQLQEYTFYFPHNVDFRGRSYPIPPHLNHMGSDFCRSTLKFAEEKELGERGFEWLKVQVANLFGVDKVSFEDRVAFTMENIENIYDSADRPLDGKRWWLKADSPWQTLAACIELTDAIRSGNPTTFKSSLPIHQDGTCNGLQHYAALGGDELGALKVNLLPSPKPQDVYTGVAQMVAQIVHEDALAGDELA…
PF00940	Ppol_Amoebozoa	YPIPPHLNQLGSDMCRGLLVFKEKKPLGPTGLRWLKIHLANLYGVDKVPFDARVNFVDKNIDKVFDSADHPLDGEQWWVGADDPWQCLGTCFEMPVHQDGSCNGLQHYAALGGDEIGGRKVNLVPSDAPQDVYSGVATVVAKRVHEDAIAGHELGKLLDGKLDRKVVKQTVMTSVYGVTYIGARLQIHNALSDKDIEWRDDDQLYHASAYITNHTFQALNQMFLGARNIMKWLADCARIIAKNKDPVAWVTPLGLPIVQPYVKNQQFLVKTVVQKVLLSDPRKDLPVNTIKQRSAFPPNYVHSLDSCHMMLTAIECQKKGSVHDSYWTHACTVEQMNVILRDQFVELHSQPLLHRLREWFIKRYGKDGRVEFPPVPERGPLDLQVVKQSKYFF
PF00940	Amac_FungiBla	DESKAPDGLSSGMWLHKWPQSTRAKVGSVLVSMLLKVAEIEREVTDPTTGATTVEKVPAFHHTYTFHQGKLLGVIKYHATVSEMLSRDPVKNTLSPKLLPMLVKPRPWLTYMSGGYLTSRSPCMRIKDGNPEQLAYLRASAKNNRLNYILASLDVLGSTPWRINEQVFKVVLQVWNKGTAIADLPPHVNDELKNKMIPKEPESKDPVVRREYLKKLEEANTFIRNAYSLRCDTNYKVEVARTFLGENLYFPHNIDFRGRAYPMPVHLNHISSDLCRGLLTFAERRPLGARGWFWLKVHMASLHGYDKQSFTAREQWVMDNIDNIYDSADHPLDGKQWWLKADDPWQCLATCYEITAAMRSGNPETYESSLPVHQDGTCNGLQHYAALGGDVLGAEQVNL…
PF00940	Cang_FungiBla	WPISSRAKVGSVLLSLLMDTAKISRETVDPATGATSTEDVPAFYHTYAFAKGKKLGIVKYHPAISEMLSREPVKATLTPKLLPMVVRPRAWLTYMSGGYLTSRSPCMRIKDNNPEQLAYLRAAAKHNRLNYILASLDVLGSTAWKVNEDVFKVVLEVWNSGEAVADIPPDLTEEKKLKMAPTQPEEKAGPKYREFLKKKEEFGNFVRNAYSLRCDTNYKVEVARTFLGQEMYFPHNVDFRGRAYPMPIHLNHMSSDLCRGLMTFAEAKPLGERGWFWLKVHMASLHGYDKQSFSAREQWVMDNMPNILDSADNPLTGKRWWLKADDPWQCLATCYEISRAYRSGDPTAYASSLPIHQDGTCNGLQHYAALGGDLMGAQQVNLVAGDRPADVYTAVAEQV…
PF00940	Mcir_FungiZyg	WNPVWPSTIRAKVGSVLTSLLLEAAKIPVPSKDPETGLKIIENIPAFFHTYQYVHGKRVGIIKFSEQLTQMLSREPVRDTLHPRLLPMLVHPHPWLSYNSGGYLSTKSLCMRIKDSAEQLIYLNKASENDHLGKVFSGLDVLGSTCWRVNKNVFNVVLEVWNSGEALADIPPVVNEHAPLPPKPENYDTDPKAKFNWVSEVKQLQTNERNNHSLRCDVNYKVETARAFLNLPMYFPHNMDFRGRAYPMPPTLNHLGNDLCRGLLHFDKAKPLGSRGWRWLKIHLANLHGYDKHSFVEREEYTMENMNQILDSVDNPLTGNRWWLKADSPWQCLAACYEVAAAFRSGKPEEFKSQLPIHQDGTCNGLQHYAALGGDLAGARAVNLANSGDRPADVYTGVA…
PF00940	Rory_FungiZyg	WPTTTRAKVGSVLTSLLLEAAKIPVPSRDPETGKKIVENIPAFFHTYQYVLGKRVGIIKFADQLTEMLSREPIRDTLHPRLLPMLVPPRPWLSYNSGGYLQTKSVCMRIKDSAEQLIYLHKASERDLLQDVLAGLDVLGSTRWKVNKNVFKIILEAWNKGEAIADIPPAVNGPTPLPPKPENYHTDPKAKFNWVNEVKQIQTTEKNNHSLRCDVNYKVETARAFLNLPMYFPHNMDFRGRAYPMPPTLNHLGNDLCRGLLHFEEAKPLGEKGWRWLKIHLANLYGYDKHSFTEREQFTLDNIDNIIDAVDNPLTGKQWWLKADSPWQCLAACFEVAEAVRSGKPEEFKSRLPVHQDGTCNGLQHYAALGGDLAGARAVNLAAGDRPADVYTGVADMVNK…
PF00940	Mver_FungiZyg	PFLKLLSPDKLSIITILELLRLNNSGGIIEGMKSARALIGVGKAIESEYNAEQMAKKSNKALFDQRYSVHELYGNGKLFNMAIRKAETKRSEAMHPTDWTPVWPESTRAKVGSVLTTLLMDCAKVQIPSFDPETNQKIVEEIPAFYHAYQYSKGQRIGVIKVHSHISEILSTEPVGAVIHPRLLPMLVHPRPWLAYNDGGYLNAQSTIMRIRHCPQQYEYLRKAHEEGLLFRVYNGLDVLGKTRWAVNKKVLGTVLEAWNSGKEFGKIPAAVGMIEDLPKPDDYDTSTKAKAKWLADNRKLKLDAKNHHSLRCDVNYKVEIARAFADEPMFFPHNLDFRGRAYPIPPLFNHLGNDLCRGLLQFDEAKPLGAKGFTWLKIHLANLAGFDKHSLSARAQFT…
PF00940	Umay_FungiDik	QELARLDQEVNENKHDRKAMLPMELQILPFLRLLPASKLALITILELMRMSGNGDVSDGMKTTRAVLQVGRAIEMEYHSDIVRKNPKIFQNAYTAQTTLRKRGLIDLAARREIKAWQKQQEDEGVLSSIPSWTQTVRARVGSYLVQHLMNVATVNRKATDRDGVLWEEDQPAFYSTYQYLGGKKLGVIKLNEVIARRLDKDSIQETLHPRHLPMLVPPKPWTSHDSGGYYSVRQSAMRYKDSAEQGSYLRVASDNGDLDTVLAALDVLGNTSWKINKPIFDVMLEVWNSGKDIADMPPVEMEVPEPQKPDNYDHDIKARSVYLQRLKQWNQQRASNHSQRCDVNYKLEIARAYLGERFYFPHNMDFRGRAYPMPPHLNHIGNDLCRGLLLFADSKPLGK…
PF00940	Colp12	RNEVEKRNRNFHSMRCDVQNKLLVAQNFADMKFYFPHNIDFRGRAYPIPPYLNQVGNDMCRALLIFSDTKPLGPKGMDWLKIHLANVYGQDKLSFDGRIEFVDKNLDHIIDSARNPLGGTRWWTRGEDPWQTLGVCFEIEAALRSKNPETFLSGLPVHQDGSCNGLQHYAALGGDVEGAIAVNLAPSDIPMDVYTGVAELAMKRVAEEAQQGHAQASVLVGKINRKLVKQTVMTTVYGVTNYGARDQIRNRLKERGDMTDQEIWACGAYLTGIVMDSMDQMFVSARQIQTWLAECAWTIAHAKEQVIWTTPLGLPVVQPYTKKFARSFNATIQHVHTESTKAAHMPPDVSAQKGAFPPNYIHSLDSTHMLMTAMKCHEEGMTFAAVHDSFWTHASDVDR…
PF00940	Cneo_FungiDik	WSRMIQLGVGSELVDALLKVAKVERTAKDRNTGEIITELQPAFTHAYEYVRGKKLGVIKLNPVVAARLAKDDIGVVIHPKHLPMLVEPRPWTAHNKGGYLLHSVPVMRYKESLEQQKWLKAASEEGHLEPVFHGLDVLSSTPWRVNRRVFDVVLESWNRGEPIADIPPSEDKAHYEFPEKPDSSDQDPQMRVQYVEKTKAVLAQQRKDHAERCKFNYNIEIARSYLKDIFYLPHNMDFRGRAYPIPPHLSPVGDDLCRGLLTFGTKKPLGETGLKWLQIHLANVYGYDKASFAERARFAQEHEADIFDSADHPLDGKRWWLKAEDPWQCLATCFELAAALRSPNPSAYESSLPVHQDGTCNGMQHYAALGGDVRGAKAVNLEAGDRPADIYTGVVDIVN…
PF00940	Crev_FungiZyg	LATSGKLFNMAIRRAKAREHRELGDTMFLDAWDISTKMRIGSLLISMLIEAARVPETSMDSTGQVVRHMVPAFTHACTMRKGKRYGMVTPHKSLMELFRSESIVGFMHARHLPMLVPPRPWLAYNSGGYLTRDEPCMRMQENHEQLRYLKRASNEDRLTTLLTGLDALGMTRWAINHTVFAAVKRAWNSGHAVAEIPASVYNAPEPQKPEDFETSKQAKFKYYAELREWRNAHANQHSQRCDCNYKIEIAQAFLNHTMFFPHNIDFRGRAYPIPPHFNHLGNDMCRGLLVFHEGRPLTERGIYWLKIHLANLCGKDKLSHEERLRFVDENWDNIAASADNPLPDTFFDGTANVVRPWWLDAENPWQALAACVEYTAAMRSPDPAAYVSHLHIHQDGTCN…
PF00940	Apar_IchthyosporeaIchthyophonida	LGKRTTARNNLGCFLNALPADKLALITINCAFASLFKDMQGTAYGQASHELGSNVCETYALDKTMRRARELQDPEMKKIWQQAQRLYEKASQRQSTGQMRVFWKKLEEESPATFALLDRPDWPPIVQTKVGAALLNLLLNTAKINPKHPRKNEGELVPAFHHSMGFVQNKALGFIKPHDAVVELLSAQNNTWEMVAPKFLPMVAPPRPYTDFNKGGYFRSSKSIMRTAYHNQQVRLLELRKEALGDVLDCLNVLSSVPWRVNNPVLEVMTRVWNSGGDEKLGMPSMTNMLLPDRSGADGTLESKLEYGRARKEAEKVNAELHSRRSDMHYRLVVAYNYRNLPFYLPHNLDFRGRAYPIPPHLNHIGADTSRGLLLFDKARPLGKEGLYWLKVQLANLYG…
PF00940	Ihof_IchthyosporeaIchthyophonida	GAAYGSFCMELGDKVFETYVMERTRQRANELKNPEVKKIWNASQKIYQQFMQDGKGSGRLRGFWKKMEETNPFVFQILEKADWPPIVQTKLGACLLHTLINTAMIDSLDPLRLITAEEKANLKDHPNIVPAFHHSYGFTSTRSIGFISPHSVVVDALSVQSRQMDNIAPNYLPMIAPPKPYTDFNRGGYYRSNRSIMRSQYHNSQARLLELRKEELGDVLDCLNVLSSVPWRINNPVLAVMTTIWNMGGDESLSLPSHHDVTSPIPPDDFDTNMAARMVHLKAHKATLKKNAELHSRRCDLHYRLLVAYNYRNIPFYMPHNLDFRGRCYPIPPHLNHIGSDTSRGLLLFDKAKPLGKHGVYWLKVQLANLYGNDKITLDARAQFIDDQWDDIVDSVKQP…
PF00940	Ihou_IchthyosporeaIchthyophonida	SIMRSQYHNSQARLLELRKEELGDVLDCLNVLSSVPWRINNPVLAVMTTIWNMGGDESLSLPSHHDVTSPIP
PF00940	Sarc_IchthyosporeaIchthyophonida	ANRGGYFTNRKSLMRTTGGEHNVQANLVEEHEKDLHRVFDALNVLGATPWRINHRVLEVITHIWNEGGNNDLSVPPLASVPLPTPPADKDDVTAQMVYKRAKKEAIKQNRELHSLRCDAQYKLVIAAKLRNYRFFFPHNIDFRGRAYPIPPHLNHLGNDFCRGMLMFGEHKKLGKEDGSCNGLQHYAALGGDVTGAYQVNVLPSKDAKPQDVYEACAKIVRELIHSDAQHEQKMALMVEGKITRKVVKQTVMTNVYGVTFVGAREQIAGRFQDRKDIPEEYVYPAAAYVTRKVFDSMGSMFTGARAIQDWLAENARVIASCGKFVHWKTPLGLPVVQVYASDKSESSQTGVQNIMLKTDVGPKSKVNVQRQKSAFPPNFVHSLDATHMLITATMCSKKN…
PF00940	Clim_Corallochytrea	QPNAWSQRERLIGYDYLHRIGNAKDILGVLKPNRSFVKWLQNQITRGDDAPISARQLPMVSMPLPWVKYNRGGYLTNNRPLMRTAGAPQQTARLAQASDRMSEVYDALNTLSATRWRVNHRVLAVATRVWNEGGNPDLDIPTMEDLTFENVADNANMTYLERYEARMRHAEIAKTNAERHSDRCSVQYQLLIAHGMRNVPFYFPHNLDFRGRAYPIPPHLNHLGNDLCRGMLLFDEPKLLGERGLYWLKVHMANMYGKDKLPFEERVAFTEDHMSLIRNSAEYPLKGQGWWMEADKPWQCLATAMELTRAYDHPEGPEKYMCRMPVHADGSCNGLQHYAALGGDVAGASAVNLLPHDRPQDVYTEVADIVRRKVREDAEQGNDVAQLVADKIVRKVVKQ…
PF00940	Clii_Corallochytrea	LGVLKPNRSFVKWLQNQITRGDDAPISARQLPMVSMPLPWVKYNRGGYLTNNRPLMRTAGAPQQTARLAQASDRMSEVYDALNTLSATRWRVNHRVLAVATRVWNEGGNPDLDIPTMEDLTFENVADNANMTYLERYEARMRHAEIAKTNAERHSDRCSVQYQLLIAHGMRNVPFYFPHNLDFRGRAYPIPPHLNHLGNDLCRGMLLFDEPKLLGERGLYWLKVHMANMYGKDKLPFEERVAFTEDHMSLIRNSAEYPLKGQGWWMEADKPWQCLATAMELTRAYDHPEGPEKYMCRMPVHADGSCNGLQHYAALGGDVAGASAVNLLPHDRPQDVYTEVADIVRRKVREDAEQGNDVAQLVADKIVRKVVKQTVMTSVYGVTFIGAREQISRQLREIY…
PF00940	Cfra_IchthyosporeaIchthyophonida	IPTWSNAVLLKLGAFVIEKVIDNCHVQRGRELRPLSAQQVLASTDAPLASQRAFHHSYVFSKTKKVGVINMHEKLREAMIGENIDLRHVHSTPLPMIAKPLPWTSHNKGGYYNNSKSVLRTPGQSNNAQTRLLARRTNDIHQVLDALNVLGSTPWRINSRVMEVVTHLWNTGGDNAVKIPTSTPTPYPTKPADFETNSEAQMLWKQEYRKIEKSNRELHSMRCDAQYKLTIADRLRSLRFYFPHNIDFRGRAYPIPPHLNHLGNDFCRGMLSFDEAKPLGVRGLYWLKVQLANVFGKDKLNLDDRVKFVDANMDNIIDSANNPLDGRKWWKEAADPFQLLAACMDLTDAYKLDDPTTHLSRLPVHQDGSCNGLQHYAALGGDVLGAEQVNVLPSDSPQD…
PF00940	Ccor_FungiZyg	FFFLLSPEKMAQIAVQGLFRTHTQYELFDGSVLSHLLTNIGNSMEKEYHSDQMKKRTNKFLVGYQNSLQQLFSSGRLFNAKLRQIHSEIQRKNINSNWVPHWPTGAKVLVASAVVKAIIDNCKFKHPETKEMTPAFNHSYAIINGFRTGVIKFHPYISESIASQPIPSSFGARFFPMLTMPLPWLTYKSGGLLTARLKCMRGKDSFEQDLYLKKADKLGRLTNVLTSLDVLGSTRWSISKPVLETITTLWNTGKEFGDIPPSYTDVTYPPKPLDYEEDASVRRQWKRDCLKMDQKAKNNHSLRCDVNYKIEIATALKDHEFYFPHNLDFRGRAYPIPPLFNHLGNDLTRGLLVFANKKPLGREGLNWLKIHLASVSGYDKYSFEDRVKYTEQHLEEIYD…
PF00940	Nspp_Discicristoidea	RKIYSELEEQTSKEYGNWTPRWTTAIKTKVGSLLLDLLVKSAVVHVPTVRPDGTTTYDTAPALWHSTAFIGTKTVGVIKFHNDVAQVINKATNIVEFLNGRMLPMLVRPRPWFSYNSGGYLTVNKPCMRVKDSPEQLAHLREASERGELQHVFAALDVLGATQWRINKRTLAVAEHFWNRDGGIADIPQRKDLELPPPPPREGPGAVPPAEYRKYVVAKRKIEKLNRELHGLRCDTSYKLEIAKAYDEAVFYFPHSLDFRGRAYPIPPHLNHVGSDLCRGLLLFNEGQPLGARGLYWLKIHLANLLGQDKLSFDGRVAYIDTQMDNIRAAAEDPCNNHWWIKNSDDPWQALATCIELSEALKHPNPAEFVSHLPVHQDGSCNGLQHYAALGGDVLGAQS…
PF00940	Bden_FungiChy	WGEEAKVKIGTFLLHLLVQAGKIAVQVPDPNKPGHKMSMDVPAFEHKVLSSYGKTYGYIIRHAAVMEMMENGCASVLPLHLPMLVQPRPWLSCNRGGYLQHGSQLVRILNNPEHREYLKAADEANHLPLVLRAVDKLGSTAWVINPIIYKVASTFWNKKESAPSIPKPIVIPEIPKPSDYDTNPDARWKYIKKNTKRLQQISNNHSQRCDLNYKMEIARKYLGETIFFPHNLDFRGRAYPMPPNLNHIGNDLCRGLLKFKVAKPLGENGMRWLKIQVSNLAGNDKASLDNRAKFAEDHRKDIIDSAEHPLDGKRWWLKSENPWQLLATCIELNQAWKCDNPLEFMSSIHIHQDGSCNGLQHYAALGGDVDGAKVVNLTRSEVPQDVYSSVSNQVMKLVK…
PF00940	Spun_FungiChy	WPDAIRVKIGSVLVKLMLQVAKVRVTRPDPDAPGKEIVEQVPAFSHVLKRIGQGHKLGMIQYHPALYEALNNTRVSVDPWLLPMLVAPRPWITWQTGGYLQHRSSMVRTKSGEAKRYLGEADRAQILGTVTRALDVLGSIPWRVNEDIFNVAAQMWNNNEHAPSLPAKLDLPEVEKPANLETDSLAKRKYWFLVNKRDTALRENFSQRADTNYKLEIAKAFIGETIYFPHNLDFRGRAYPMPAHLNHIGNDLCRGLLLFDQGKPLGEAGMRWLKIHVAALAGFDKASFGERERWTDDHMVEIEDSVDRPLDGKRWWLKAENPWQLLAACFELVNALRSGKPLQYISRLPVHQDGTCNGLQHYAALGGDEIGAQQVNLLPGHKPADVYTGVAERVQLLVD…
PF00940	Spom_FungiDik	WPSAIVMKVGSVALCLLLSVAKIEVTAKDLSTGGILKQEVAAFVHTYQYSNGRKVGMIVPHVEFYKLLSRDIEKPHLHPQLLPMLVTPKPWTSWIDGGYYYSRQPLVRLKGALEQVDYLMKASENGQLDELFKAVSSLGKVSWRINQRLFNVLIRIWNSGEKFLSIPPREVKCDMPPYPKNSINPRDKVIWHTRRKELAALKTGAHSQRCDFNYKLEIARAFLNEKFYFPHSLDFRGRAYPLSSHLHHVSNDVCRGLLEFSTGKPLGPKGLNWLKVHLANLFGISKKDFATRQAFVDDNMQEVFDSADRPLDGNKWWSKADDPFQALAACFEIAEAVRSGDHESYISHIPIQQDGTCNGLQHYAALGGDIEGAKQVNLWPSDHPSDVYEAVAEIVRGFL…
PF00940	Dcos_ChoanoflagellataStephanoecidae	NFVELHKDNYSDQIVTTYSEYTKVLQDRVDGQDIQSEYQQSTSRELWDAIEDKHAGHIVADNSKLAAWPFSALVAVGTRLIDVVISSSNIRSTGLVDEDEEAFVHSYDFAGSKSTSVIRPHAALCSVLRTLSSQSEKIRERETFSKPVDASLLPMWSPPKPWRSLREGPYLITPTTFVRCGDDKFQHYSLLASEEANLTEVYDALNYLGGTPWTINTKVFDVLKHFYKTGEAFEHLAVPAHDVALPKAPKVDKTTKEGVMAWMEHKALYTRKKKDRNENAGLRAVLISKLGTAEMLQQSTFYLPHNLDFRGRAYVIPPFLSHIGSDDSRALLRFGVGKPLGENGLWWLKVHLTNLLGVNKISLEERVKYADDRMDDIIRSARDPINEEWWQHSEEPWQT…
PF00940	Mbre_ChoanoflagellataCraspedida	ALGAKLTTIAQAIGRALYRLYFIRHNEQTGATRETLQVYSEYLKDFNNTSMSRNALADTWRRVEQRLGIKTDDQYDSDLLSPWPIPVLLACGTSLLEVVLQTSSTGHLPNHDKKPVAAFYHMMQLDGVKRVGYIRCHKLVLDRVSGQASDRGSCVPSKVAIDASQLPMTIPPRPWTSVRKGAYLICPSAIMRTGDWAFQHFALLSEATHNLARVFNAISALSATAWKVNGQVLRVVTELFHSEDGYDDLGIAPFRVNYEVDKTDPKSLKTHKKLSNEAHSLRSDLHLRLMVAHWLGEKQFWLPHNLDFRGRAYSMPPYLTHIGNDMARGLLTFAETKPLGADGWRWLKVHLANVYGKDKLPMDERAKFAEDNMENVLSSADRPLAGKSWWLKGENPWQV…
PF00940	Sros_ChoanoflagellataCraspedida	KPLGKNGLRWLKIHLANVYGNDKCSLDDREKFAEDNMHHVEETVRNPLRFLEDGEPMWWLQGDNPWQVLAVCNELHDAMCAPNPEEFESGFPVHQDGTCNGLQHYAALGRDVEGARHVNLVRVPEDDRPQDVYSAVARTIDTHLQRHAQGDFSSTSKLPVSHEVAQELASLLVAQGPMKRKIVKQTVMTNVYGVTFVGGREQIGRQLKAAKVVPPEKVYATASYLTALVFLSLGEIFEKAQLIQQWLSQQAKKIAASGEPVAWVTPIGMPVVQPYHNAIKSTFSTNLQTIWLVETGNPSQLPAVGKQGSAFPPNFVHSLDSTHMMMTANACRKDGVAFASVHDSYWTHAATVDQMSRHTREQFVNIHSRPLLKDLHSFFRLQYEGRKYVRPRGNDETTV…
PF00940	Adig_Metazoa	VHPRFAPFIQAFESHELADLTLETIVFYVKGRVEGVPLYGVSGALGTVLNTKYIVKHRVQSGMLDKMKAIYHDYFSYLMDENVTTRKMARELWDELDDTRPFGASLQQEVPNWPWATKLVFGCFLVDLFLKTAQINANMFNNKPEEKLLPAFYHTYEFKVDKKLGVLKPHPFVCKMFKGYLAKQGEIFMETTSVPMLVPPRPWRTTKDGAYLILPVELVRSAYDEDGRYDKLLDEKTKKEDLVAVFDSLNFLGSCAWRTNKRILDIAIDMFNSGGNEDLAIPGRVVQPETEIKSSKSKMEPEERKKQIQERRIAKKLAREQYSLRMSCLYKLSVANHFRDHVFWLPINLDFRGRVYPIPPHCSHVGDDLNRGMLQFAKGVPLGQKGLDWLKIHLVTLHG…
PF00940	Nvec_Metazoa	CSLLKNKQVSNDLMPRELWDGLDLGRPYDASLKQEIDDLPWATKLLCGCTLIDFLIQSVKIDANLFNAKSESLLPGFYHSYEFRERRKIGVIKPHSVVCKLFKGYLADHGDIAMPTTSLPMLVPPRPWRDIRDGGFLIQPVQLMRSTQEMDDNHDHMLRYKCDSRELSAVLDSLNYLGTCAWKTNNRILDLAIQVFNDQGDDTLAIPGPVVPLELEPLEKSVKEPEARMKQIQEHRRARKLAREHYSLRMTALYKLSVANHFRDRVFWLPLNMDFRGRVYPIPPHCCHVGDDLSRGMLQFAEGVPLGPDGLRWLKIHLANLYGAKKKSSLDERVEYTDQMMSEVLDSADNPLTGARWWMHGDEPWQVLATCMEIAKAVRSPDPAQYVSHQPVHQDGSCN…
PF00940	Hmag_Metazoa	MKVHPLISRLWHSYLNQLGEISFEVNKLPMVMPPRPWVSLTSGAYLLLHSDFVRTVSGQYKLHELSKASKEGQLSRIFDSLNYLGNCGWKVNTKILDIMLEMFNNKGDMKLDIIGPIETMMQQYDYKEDMTAIDKKTNKRLKKKLHHELFALRMDLLYKLSISNHYRDKIFWIPNNLDFRGRAYPIAPHCSHIGSDAARGLLLFAKGKKLGENGLNWIKVHLVNVHGHLKKSSLKERIEYADNHLEEIMDSADKPLTGKQWWREGTDPWQTLVACIEITNALRSPDPSSYVTYAPVHMDGSCNGLQHYASLGQDSYGARQVNLTPADKPQDVYSEVALLVEKARQRDASKGDTLAKELDGKITRKVVKQTVMTVVYGVTFVGGRLQIEKQLKEMGVSND…
PF00940	Tadh_Metazoa	RLQLGSAIVEIFLRVAKVNVNLMKEKAEEKFIPAFYHVYVFQKQRQVGFIKPHPNVMKLGKFLMETSMLPMLVPSRPWLCHHDGGYVATPAPIMRYREDCFDQDVLLAKSSRKLRSIYDSINYLGSCPWKVNKRVLDKCIECFNETGSDILDIPDPRLIPMPPYPVDPDIEPQEKRRIIELRRQVAKKQREHHSLRMDVLYKLSVAKHFENDIFWLPHNMDFRGRVYPIPPHLSHVGNDLSRSLMLFAIGRPLGTEGFDWIKVHLANVHGQMSKASLTDRINFTESLKNEILDSADNPFTGDKWWQTGEHPWQTLATCMELADVWRCDNPEQYISYFPVHQDGTCNGLQHYAALGRDTLGAEQVNLVSRGIPQDIYSAVARLVEEHRAKDAKKNNFNAL…
PF00940	Aque_Metazoa	YTRLRNKAAAMSFNMDSSEIPMRVPPQPWTDATNGAFLLTPSSVVRTHYDSFHQQLLLKAADSLSPVLDSLNYLSLYPWRVNNRILDMAIDIFNQGGDKSLDIPTDELFDKPLPKYIKDIDEETRKKIYKERFAIKKENAENFSLKMTLLYNLSMCNHFRDCLFWLPHNMDFRGRVYPIPPHLSHMSSDLSRSLLQFGVGQPLGRRGLEWLKIHIATLHGAKSKSSLNERLEYTDSIIDDIADSADKPLEGRGWWRTADVPWQTLAASMELMDALRSGDPENFISHTTIHQDGSCNGLQHYAAMGRDVYGAHQVNLVPSEKPANLYAEVAKLVDEKRKVDATSDKNVEIAKILEGKVHRKVVKQTVMTVVYGVTFVGGRLQIEKQLKGTIPDKHLFEAS…
PF00940	Bflo_Metazoa	RTLKKQMDRQSKVKGQVNIYPFLCVLDDQEYVEMMVQAICLVAVTGDPLLIIARELGMKIQQKYRIKQKLQSGCVEKIGQIYQDYCNFMVNNNQGGKPGQARELWCQLEGGQGVGPGVGDECAWPINLIINLGSLLVDAMVREVKIDNNLFRKTSEQKLIPALYHMYTYRNIKQVGIIKPHPMLVQLVEGAQDTSLVFDSSLLPMLMPPVPWSSVKKGGFLLSPTKLMRSNDATLQHELLLEKVGTSELYPILDSLNQLGACAWKINQPILDLVIRVFNNKGSKELDIPQPVSEAPTFPKLGTEILTNGDKQAMRKQMAQVRKLRSEMHSLRMDMLYKLSIANRFRHEIFYFPHNMDFRGRVYPCPPHFNHLGSDVARSILVFAEGRPLGEKGLEWLKI…
PF00940	Xtro_Metazoa	RDSKKHLEMKSRISPRVNLYPYLCLLGEDQYVDIMLQSLASIPPTGESFLVMSRDMGTKINNRYSIHKKLQESHINRIQDLYRDYCQLLAKNGKVSGLLPREMWEQLEQKKYGGASLMNLDTIWPNSLLVQLGTHLVDLMVQEIKVPNDLLSSRDDPKLIPVLYHMYSFRSTKQIGLIKPHPIFSQIQSDAGESCLTFESSVMPMLCPPVPWLSPRFGAYLLSPAKLMRCMEGAVQHQLLLEKSPPGQLYPVLDSLNQLGMCAWRINQPILDIIVSIFNEKGNEKLDIPPPLSEAPKLPEQPHGDLNSRDKMMHQRELARCRKKSSEMHSLRMDALYKLSIASHLRDKIFWFPHNMDFRGRTYPCPPYFNHLGSDVTRALLLFAEGRPLGPKGLEWLKT…
PF00940	Lgig_Metazoa	KLQPAVCIIYRSNERKQFEEIKVNDVVSKLYQKCPSVDIPMKAGDLPMLSPPLPWVKLYHGGLVLCNVKLVRSSDVYKQQENRIKDLPAGQINPVLDSLNSLASCAWKINKPILDIAIGMFNDKGNSKLEIPPPQSELPIPSRTKRSPDMTQQERSAHFHEQSNIARLRAENWSLRSFELYRLSVANKYRDEIIWFPHNIDFRGRTYPISPYLNHLGSDISRGMLMFAKGRPLGPDGLDWLKIHLVNLIGLRKRSSNAERLKFAETLIEEIQDSADYPMTGKLWWQDREEPWQVLACCMEITKAIRSPDHTKFISHFPVHQDGSCNGLQHYAALGRDSIGAKSVNLCSYPVPQDVYSEVVDLVEKLRHDDAEKGNKIAKMLEGKVIRKV
PF00940	Dpul_Metazoa	IRDMQMCKAQFEATRRKTLHIYPFLSALSTEDYVRLLTQEVQMLSGTSELFSPSMHLFCRNLGFKVIRETRIQRKKENGQLEKFQLLYDKYCQWYMNPTKDGQLCNPRQMWQQLVTQHQIEGCDLDYESIFWPHTVVLAVGQFLYNIILSNLKISDPTNTDGKPSPAFYVVYRTKGVRSLREIKPHPQLVKFYDEIRKKKLSFDSSLLPMLSPPLPWSSHKCGGYLVTDVSLVRLPAHASKQRLRLANTPPQQLYPALDALNALGSIPWRINGSILDLVTQIFNANGSKELHIPQPPSALAIPSPVAAEADGSHKVKAYRDRIAFKRQKAEMYSLWCDSLYRLSLANHFRDKVFWLPHNMDFRGRVYPCSPHLTHLSHDMARSLLFFAQGKPLGADGFN…
PF00940	Ctel_Metazoa	KKNAPKSVIPAFYTVIKKANVYYNEEVMPHPVLCMLFRTAKLKQVTFSPIELPSVIPPVPWTSHKHGADIFSTVELIRHADDVRRDTLLSTPLQKVLPTLDALNTVGACPWIINKKVLDVMVEVFKTGGSEQLDVPCSIHDIPLPPKIHSWCPAAVWHRLLLEGSIAVDFSSNVSKCRNVKQQKEKNSPVEKSLRSDVWTLLTSMSLKSTFPAVEVPGSDLSRGIMVFGQGKPLGASGLDWLKIHCINLTGLKKRSPNSERLAYANEVMDDILDSAERPLSGRGWWKDADEPWQTLATCMEIAAASQSPDPSAFVSHLPVHQDGSCNGLQHYAALGRDVEGAKSINLHPMDTPRDVYSDVVELVESVRADDAMKGNEIAKVLEGHIQRKVIKQTIMTTV…
PF00940	Hnan_ChoanoflagellataAcanthoecidae	GVPLTTLAMSVGQQVFLRYFVESQMEGGIHPVLETVYPEYARRLATNVHEVGRDVWEDELEAQDISDDGVSLVDFQWSERAMIQIGTYLIDTVIKRARLCDLPYQTKGAALTGEDALAEALFHTYDFRNGKIMGVIKAHPALISSHGGNTGAGTVPRKYKVFRPTELPMLTMPKPWRSVDSSPYLATPATLIRCRHDQYQHLALLSKMQHSVGEVYDALNYLGACPWKINTRILDYVMALYKTGEGVEDLAMPAEPTPLERISHDARDEMSEDEWKEENADFRKTQKEHYETMSLHADLSSKLCIAAAFRNDVFYLPHNMDFRGRAYTVPPHLSHIGGDMTRALLRFGDAKPLGERGLYWLKVHLANLGGVDKVSFEDRVQHTDANMDLIFDSAIDPFG…
PF00940	Pgem_IchthyosporeaIchthyophonida	KNEGVHEEDLEPVFVRYHSKSSTKQKARLIQMHSCIEAALEARGVVNCTNFSKLLPMVVPPIPFTNYKFGGYLLRYSRPFIRLNYNKDQLKLLNKTNEKVLDPLYDALNVLSNTEWAINKKVLHIAIHLWNAGGDDSVKLIKSKGMRPDEEILQNMNLDESLDISNDPLAIRDFHRLKRKLKLDSKNRFSQGCDTHYKLLVAQYYQNFMFYFPHDMDFRGRAYPIPPHLNHMGNDLCRGLLTFNDKKKIGTIGLKWLKIHFSNVYGKDKLTFEDREKFCEEHLDEIFKVAEDPLVNTWWKTAENPWQTLGTCFELHAAYQLKDPTEYESHLPIHQDGSCNGLQHYAALGCDIQGAYSVNLLPSDRPQDVYQGVCDKVNEYIEQDCLDVESDFNDIAKLL…
PF00940	Ttra_Apusozoa	KLHVGAALIKTALATCTVAVPDGGHAAAFEHRIDVGRGGRKTGWIALHSYVLDLVEAGHLEVQPAPRLSPMLVPPRPWTSPSSGGFLSLPTSVLRAKSYVQQEALRGVGMSEVLDGLNALSATPWVVNARVLEVIQAAWDAGGGLPYVPSRAPVDDPPPPPADAPASEHAAHRRAMAKARQARNDLTSLKADLDITLRTAADLADKTALFQPTNLDFRGRAYPVAPTLNHLGSDLKRGMLMFAEAMPLGERGWFWMKVHLANVFGFDKASNIERAAFADENLDKIRASAANPLGEGEYDRWWLEGENPWQTLATCFEIAAAVDSGSPADYSSRLPVAQDGSCNGLQHYAALALDAVGGGSVNLVPGPEPADVYSDVLRVVLEVIDRDAATGVDIAQAVQ…
PF00940	Falb_Discicristoidea	PFLSLLKPELTVDTLLNEFISHYGAGPSLGMRSTHLMLAIGSALESTYNGLKLKRHRAHLNLSDQRIRQILGSSRMFNTSLRRLMSSHEHNLRSNFGNWRPVWPGVVRARVGSVLLHLLLSNAYIDVPVTRPDGSTVFETVPAWYHTYAFVAGRRVGVIRPHAQLSEILSQAKALNTLLPGRLLPMLVPPRPWLTYNSGGYLTQDRPCMRIRGSRLQFQMLRAASYAGQLTEVLAALDVLGQTRWRINTRVLDVASAVWNNGGGVAAIPDRKDIPLPEMPADMTSLSAMMRRQLTADTRQAIKINRERHALRCSTNYTLEVARAYASGPLYFPHTLDFRGRAYPVPPHLNHLGNDLNRGLLLFDEARPLGERGLFWLKVHLSNVLGHDKIAFSERVEIV…
PF00940	Awhi_IchthyosporeaIchthyophonida	GLRRGFLDLHELFRLQLKNKVPNLSGNLKLLPMVTKPLPYIKNFQGGYFTRSRNIVRASDNGIQVTLIDRSLTKKDKDGNHKLSQVFKGLNVVARTEWAINKNILEIVKYVQKNGGNPKLKIPKYGTEEAVDFTKVTSNTIQDRIDLFRKAKQKNQSDLSLKSLQSSENYKIIVADAYRNHKFYFPADLDFRGRCYAVPPYLNHIGNDLCRGLLIFNEKKRLGARGLYWLRIHTANLFGADKLPLVERHAFTEANIDTFLRCASDPMKHTEWMDADAPFQCLAAMIELSQALKLDNPEDYYTGLPVHQDGSCNGLQHYAALGRDSLGGLHVNLVPAERPGDVYQGVCDQVNKFIERDLRPNADSYNQSLAKILHGKVNRKVVKQTVMTVVYGVTQLGAR…
PF00940	Sdes_IchthyosporeaDermocystida	GGYLTCGAKAIRSANDVQIAHLENNESQLHKTFDALNSLNSIPWCINKFVLKTITEFWNSQKSDDRLAIPLFTKKTLSDDIILSTPAKELKKLQRQLDNINSNSHSLMSSMQYVLLISHAFSTHVFYFPHSVDFRGRAYPVSPHLTHMSSDYVRGLLCFHEAKPVTKQGIFWLKVNLANLFGVSKLSFEDRVAFIDKMLPSIRKSVENPHDEEAIWKTASDPWQFLAGAEELTRILDSPTPENELSRIPVHMDGSCNGLQHYAALGGDFEGAQLVNLVPCDKPQDIYSKIAEMSFAQVEKDAQDKTNENSHLASILLKAIPSSGPIRRKIVKQTVMTNVYGVTFYGGREQIHKRLETFDGLGGHSSDCAVYLAKIVFKNIEGNFSNATIVQKWLSNCAK…
PF00940	Cowc_Filasterea	LLEVLSRRKLASIAISTLTREVVGSAGCRHVLAASHIGRQVHMAYSLKRLGAGGNEFARLAASFPKFMAKFKKSAMPGKVVPDHVVWKTFIQHHLIGVKAVSVPDWSEDTFVAIGGALLSHLIAAAEIRPGMADVVDFVPHVEHNRKVTMLCPNEHLVQFFKVHPRDVRNQTFQFAKMLPMVVPPIPWISHNHGGYLLLSATGRSTLMRTIHNDQRRILKLSQNRLGGVFDALNAIQTTEWRVNSRVLAIQIAIWNQGGDPELDIPDVKDIPEPRQPTGADATHTVMAEYFATRQQIREENRNMHSMRCTVQYQLLIAYKLRHNRLYMPVNLDWRGRAYTVSPNLTHLGGDMTRSTLMFHQRRPLGENGLFWLKVHLANLCGADKCSLQDRVKFVDSNW…
PF00940	Gpro_FungiChy	MWERVEGLLSKAHAAVAGEKFDMPWLPNWTLPLAARVGAFLLDALIATARLPSKDSTIQPFAFSYKKVLDNRGDSLIQSRLIGVVEAREEVREWANASLAGMEASYLPMICQPRNWAGVGERSGPYYGRGARIMHFTPTAPSQLAYLRAADSRQHLTHLFSALSYLGSIPWRVNDVVLPTVIELWNSGVSLGDMPPAAMERRIPPPALSNGMKAWKERRAKGEVGREEIRDFAIIAAARAKWLKDERERYSRRCDAGLKVVLAAAMAGRPIWFPHHIDFRGRAYPVPPNLNHIGNDLSRSLLRFDLRKPLGDRGWFWLKVHLANTYGFDKASFEDRVKWTEERINDVLDSARNPLGGNGWWKKADSPYQCLAVCHEVARAMEHPEGPEKYESGLPVQMD…
PF00940	Nk52_Ichthyosporea	DKDRALSLSTIIQKGKDAVLFSSAIPKEEFIDVCLRTTLDILLNQKGKDMPYYSIMTSVGEAVRDRYINKCIISYLKKSSERGFREKLKWYNELLKVNEVGHLKVMKLRQFWESIRDEVSSVHPDVPDWPQVVCAMVGNLFLEYACKECYIEKRGQSGKLYAFERSRSDFELDFEKRYSMIKLSEEFENSFKAGYSQSMVKLLPMTIPPVPWTSYIDGGYLTFKRHIMRTKNSHIQKELLKASSAGKEEMGMIYDGLNSISLTSWRINTFVLENLIECWNNGGNERVGVVEYQMLDEEEKRAMDLERKAILEKKKTKLRMLYADRKYVAEKISNYGTLSASENMEASGSLEELEKRKKLVGDEISAITTAINEIDDVLKKERDAHSQSISLLLNLIIAR…
PF00940	Mlei_Metazoa	VYKIYCKQHSGFDQSKYEEYLKEIRNASNLSPQMVWEKGNTQKFHQFAPFWSTNTMNSIGGFILNLVRMNFKFDKLECEDVLKNSSPRRRDRELTTVFTHTYHVSDNTSHTYPVGTYVSHPVLKELITQNMETRGYFYFETTEIPMICPPKPWCYHSLTPMLLSGVQFIRYAGYEWKKYYSDVLNEFDRKGHIDVIKYGLDVLGTLPWKVNSKILEKQIEVFNAGGLEKLSIATVFDKEYPEAPNRSTVDEDVMKAYHQTYKLLKKEENEKHALRCTQLYTLSLANSLVDAPFWQCYNLDFRGRVYPVAPHFSQMLGDPARGMLMFSEGAPLGENGLRWLKVHCATTFGGLGKATFEEKERFVDDNIDNILKSADTLCPHQGWWAGSTEDPWQCLAACV…
PF00953	Ddis_Amoebozoa	NVSLQWIIVQSGFFSFGAGLLTYKLIPSVADLTSQANLTGMDLNKKGDPKFSGKKMPESLGICVAVVYLVCVILFQTFQWFSFPETIQLSEYNAALTSICFMILLGFGDDVLNLRWRYKLILPMFASLPLLVAYAGGTTVVVPDINFPVPLREWLGVVFDLGIFYRIYLLMLAIFCTNSINILAGINGLEVGQSVVIATSIIIHNLIELTIASSVPSSSSFSSSALSSVSPHLFSLILMIPFLFTTISLLFYNWYPSRVFVGDTYTYFSGMCFAVVAILCHFSKTLLLFFIPQILNFLYSVPQLFGIIPCPRHRVPKFNPETGKMEAIPTNLTIINLLLMITGPLTERQLCVYLLIFQGLCSCVGFGIRYHHLHHNPTL
PF00953	Ppal_Amoebozoa	SIGAGVLTYRLIPSVAELTSTAGLAGMDLNKKGDAKYSGKKIPESLGIATSVVFLVCVILFQLFQWFSFPEAIQLSEFNAALTSICFMILLGFSDDVLNLRWRYKLILPLFASLPLLVAYAGGTSVVVPDINYPINLRAFLGQVVDLGIFYRIYLLMLAIFCTNSINILAGINGLEVGQSAVIATAIIIHNLVELKLHYSSSVASGVLNATLLPTSPHLLSLVLMVPFLFTTFALLMYNWYPSRVFVGDTYTYFAGIVPQLFGLIPCPRHRVPRFNASTGKMEAIPTNLTIINLCLMIFGPMTEKRLCLTLLAFQGLCCAAGFGIRYFVAPYFF
PF00953	Ppol_Amoebozoa	TESLSEYNAALTSICFMLLLGFSDDVLNLRWRYKLVLPAVATLPLLVAYAGGTTVVVPIPLRFILGKVFELGVLYKLYLLFLAIFCTNSINILAGINGLEVGQSFVIACAVITHNLVEISLQATPTSGANHTFSLFFMIPFIATTTALWCYNWFPSRVFVGDTFTYFSGMCFAVVAILCHFSKTLLLFFIPQIFNFVYS
PF00953	Ttra_Apusozoa	TLIPKLAPSLRDNGLFGIDINKFDAAGTPRTQWGSRTKVPESLGLVCGVIYLATVVVFRFGEPAVRNALADAGTDRAIDLGEYNAALHSICFMLLLGFADDVLELRWRYKLVLPTVATLPLLAAYSGGTSVVVPNMLRPWLGPFFDLGLFYIGYMGCVAIFCTNAINIYAGINGLEAGQSFVIALAVVVHNLVEMLAPSASSEPDLHQFSLSLMLPFVGVTLALLHYNWYPSSVFVGDTFTYFAGMSFAVVAILGHFSKTLMLFFLPQILNFVLSLCPRHRLARYDPDTGLLHAVPLLNLYLYFAGPLPESTLNLHLMALQAVSCLFAFVIRYYVSTFFYD
PF00953	Pbif_Breviatea	TKYLIPHVKEMTLKRGLAGRDINKSPKKGEEQKLVPESLGIVSATVFMLALIVLQLKPFSDFETANETSLTVRLVEYDAALASICFMVFLGFADDVLELRWRYKMILPALGSLPLLAAYQGSTTVLLPVGIRFWGGDTVDLGFFYLCYMGFLTIFCANSINIYAGINGLEAGQSIVIALAVVVHNCVQIGLATPISLSEKLDLTANFFALVIMFPFLGCTFGLLYHNWYPSTVFVGDTFTLFAGTTFAVVGILGHQSKTLLLFFGPQILNFVLSLPQLLGLIECPRHRVPRLNSQTGLLEDSGNLTLINMYLKLSGPLHERTLCIHMLALQVLFCSGAFLLRYFIANLLY
PF00953	Pisp_FungiNeo	PIYICILASVLAGLATHKLIPSFKPQLIKARLCGTDMHKKDKRLLPEAVGVVSGMSYIVCLCLLIPFPFVKWFLNEKNGSQLNQEEFPHHKFEEFIAGILSIVSMLFLGIIDDVLNLRWRQKLVFPTIASLPLLMVYIVSYGVTTIVVPIPLRPIFGRIIELGPLYYIYMGMVAVFCTNAINIHAGINGLEVGQSIVIALSIIINDFHFLFTGAEPAVEAHTFSLFFLIPFVAVSIPLLWYNWYPAEVFVGDSFCYFAGMTFAVVGILGHFSKTLLLFFIPQIFNFLYSCPQIFKLVECPRHRLPSYDEKNNKLYASRADLTLPNALKEHGKMILKIFEFFRLVDIEYDEKTKEMKSINNLTLLNLFLIKFGPRSEKNLAIMMVIVQILSSALAFFIRY…
PF00953	Mcir_FungiZyg	LTISIVMSIIAGLCAHSCLPKLRDTFLKANLSGRDLLKRDKPLLPETMGLPVAIIYLITLFLFIPFPFINWFEGANLVHEDDPTVGTFPYNKLGEILSAILAIQSMILLGFADDVLDVRWRYKVWFPAIAGIPLMIFYYTNKGVTYVMMPVQLRPYVGDLVDLGPLYYVYMAMLIIFCTHSINILAGINGIEAGQSVVIGISVICNDLLYIFNNPDRASVEAHLFSLYFIIPFVGVTCALLWHNWFPARLFVGDTFCYFAGMTLAVVGILGHFSKTLLLFFLPQIFNFVYSCPQLFRLVECPRHRMPRLNDQGLLQCSTVRPNDKKPMGKLGNIALKLLRALGLLKVFEYDAEGRIIECNNLTLLNLVLARFGPMSERNTTITVLFIQACASLLAFFIR…
PF00953	Rory_FungiZyg	MSVIASLMIFTTLPNLKETFINARLYGKDILKAGKPIIPETMGLPTAITYLITLFLFMPFPFIDWFQGANLEYGENASLDTFPYNKLGEVLSAILAIQSMVLLGFADDVLDVRWRYKLWFPALAGVPLLMFYYTNKGGTTIMMPLQLEPYLGKNVDLGALYYVYMVMVIIFCTHSINILAGINGVEAGQTLIIALSVEVHLFSLYFMLPFIGVTGALLWYNWFPAQMFVGDTFCYFAGMTLAVVGIMGHFSKTLMLFFMPQIFNFVYSCPQLFRLVECPRHRMPRLDAETGLLKCSTVRPNDKKPLGTLGNIVLKLLKAFGLIKVFEYDKNGQIMECNNLTLINLLLAQLGPMTEKNTTIAVMSVQILSSFLAFFIRYRLVHFVY
PF00953	Mver_FungiZyg	PLTVNVGFSILAGITTWYAVPAISETFVKAGLKGMDLSKKTKHIIPESMGMVAGLIYLVTLFLFIPFPFMKWFTAPVEGDPQELKLLTFPNLKLAEILSALLSIQSMVFLGFADDVLDIRWRFKMPLPAIAAIPLLMVYWVNIGQTHIMVPIPLRPLIGQLIDLGALYYVYMGMVAIFCTHSINIMAGINGVEVGQSLVIACSIAVNDMLFLQSSSSGPKAIEAHLFSLYFIMPFIGVSWGLLVHNWYPSKVFIGDTYCYFAGMTFAVVGILAHYSKTLLLFFIPQIFNFILSSPQLFRLVPCPRHRVPRFNTNLTILNAILLRTGPLNERNLTIGVMIVQVLCSLLAFFIRYGLVAYVYDV
PF00953	Crev_FungiZyg	PLAVCTCVSALAFLATWCMVPAATATFKRVGLSGTDMSKPTRPVLAESMGMVAATIYLVATFLFIPAQFRGWWMTSAPQSAHHSHMFPFGRLGEYLSALLSLQSMVFLGFADDVFDLRWRFKLILPTIASIPVLIVYYVGYGVTHVVVPVFMRSWLGTNTVELGILYYIYIGLMAVFCTNAINILAGINGVEVGQSIVIALSIIIKDIANINNANPEAEYYHLFSLYLLLPFVAVSCALYYWNVYPAHVFVGDTYCYFAGMAFAVCGILGHFSKTLLLLFIPQIFNFVYSAPQIFGLVPCPRHRLPRMARGTSARPTAYMVASRTSLENARPLGLAIIRIYERFGIANVERDAQGTMVSVNNLTLLNLVLVQCHRLTESQLNNRILLIQVLNSLLAFFI…
PF00953	Falb_Discicristoidea	LAALLSIGSMAFLGFADDVLELRWRHKLAMPALASLPLLVVYYATYNHTEVLLPRVVRLAGRLVLGGAALPGRTVQLGLLYYLYMGALAVFCTNAINILAGINGLEVGQSLVAGGALAAHLHLLALVLLLPFLGVSYALYLRNRTPAAVFVGDAYCYFAGMTLAACGIVGHAGKTLLLFMLPQVFNFLLSAPQLFGFLECPRHRMPR
PF00953	Nspp_Discicristoidea	LAVNVALSALVFAVTLRLVPALAATFVAAGQFGHDVNKPDRPPIPEGLGVVCGVVYLVALFVFIPVPFVDHFFGDRSSFPLETLAVLLSALLSICCMIFLGFADDVLDLRWRHKVLLPTLATVPLLMVYYVTYNKTHVVIPIPLRFALGTTIELGMFYYVFMSLLAVFCTNSINILAGINGVEAGQSLVIALAIAANSYIQLVSTDCCVQENLFTLYLILPFIATTAALLYHNWYPSRVFVGDTYCYFAGMTFAVVGILGHFSKTMVLFFVPQLFNFALSLPQLFRWVECPRHRLPRLNKDTGLLEPSRASLASGTWLGRQCVTILSALGLVRVYYKDTAKPSYDGAEVSNFTLINVLLLWFGPQREDTLTKLVLAVQVLTTLVAFVVRYPLASIVYN
PF00953	Adig_Metazoa	GQSLIIAISILIFNIIELQGTCCWQAHLFSAYFMMPFIATCAALLYYNWYPSEVFVGDTFCYFAGMAFAVVGILGHFSKTMLLFFIPQVINFVYSTPQLFHFIPCPRHRLPKFNPETGKLGMSYAIFKMSDLHPLGKLILSVFSLLRLVQVETGVGEDKKSARVNNFTLINFVIKLLGPVHERTLTTIMLLIQVGGTAIAF
PF00953	Nvec_Metazoa	PLVLNLLMSLITFIIAMKVIPRVKMLFAFAGLAGKDMNKKDNKDPIPEGLGAVGGALFLICMFLFIPLPFLSIWLEKGDFDFPHHEFVMFIAALLSICCMIFLGFADDVLDLKWRDKLILPTMASLPLLMVYFVNIGVTTIIVPKPVRFIFGFDLDLGILYYVYMGMLAVFCTNAINILAGINGVEAGQSLIIAMSIVLFNLLELQGTCCWQNHLFSLYFMLPFIAVCSALLYYNWYPSSIFVGDTFCYFAGMAFAVVGILGHFSKTMLLFFIPQVFNFVFSLPQLFKFVPCPRHRLPRLNPETGKLGMSYSAPFKTQDLNPIGRLVITVFGLLRLIHVEHGIGEDKKYTRVSNFTIINLLIKLLGPTHEKMLVYIILGIQLVGSCTAFIIRYHLVRLF…
PF00953	Hmag_Metazoa	FVEFMAALLSICCMILLGFADDVLDLQWRYKLILPTIASLPLLMVYFVNFGSTTVVVPSPMRFWLGLHLNLGVFYYIYMGMLAVFCTNAINILAGVNGLETGQSLVIGLSILLFNFMELSGDSWKRHLFSLYFILPYCFVSTALLFYNWYPSEVFVGDTFCYFSGMTFAVVAILGHFSKTMLLFFLPQIFNFLYSIPQLFRFIPCPRHRLPK
PF00953	Lgig_Metazoa	MINAGMSFLGFLLCLNIIPKFKPMFIEAKLFGIDMSKTSKQKVPEALGVVCGAVFLIILFLFIPIPFYKHLSTGTEKFPYHEYVEYLAALLSICCMVFLGFADDVLDLRWRHKLLLPTISSLPLLMVYFVNFNSTTIIVPQPLRGLLGYDLNLGCLYYVYMGMLAVFCTNAINILAGVNGLEVGQSWVIGCSVLIFNFIELSGEQRDAHMFSSYFIMPFISVTSALLYYNWYPSQVFVGDTFCYFSGMTFAVVAILGHFSKTMLLFFIPQILNFIYSVPQLFRFVPCPRHRLPRFNAKTEKLELSTTKFKYKELSIIGKLLINIYRLVGCIKILDNNEEFMECNNFTLINLAIRYLGPLHERTLVSILLIFQIFCSIIAFTIRYQLALLFYEK
PF00953	Ctel_Metazoa	MEETSCIKTLLINVVFSIIGFILTMKLIPGLKHMFIKANLYGIDMSKTSREKVPEAQGVICGAIYLIVMFVFIPIPFLDHLATRDTLQFPFHEYVEFLAALLSICCMIFLGFADDVMDLKWRHKLLLPTIASLPLLMVYFVTFDLTEIIVPKPLRGVLGYSLDIGLLYYLYMGMLAVFCTNAINIVAGINGIEAGQGLVIGLSVIAFNIMELGGNFREAHLFSLYFLLPYVGVCSALLYHNWYPSGVFVGDTFCYFSGMTFAVVAILGHFSKTMLLFFIPQVFNFILSTPQLFRFVPCPRHRLPRFDPQSDTLRPSMARFKSSEVSLLGRIILRVFSLFRLIELKENEGEDGKFCTNMTIINLALRILGPTHEQRLTFILLMLQVFCSVLALFIRYPLA…
PF00953	Tadh_Metazoa	DVPDPIIINAFASVIALITTVISIPGARRLFIQAGLHGRDLNKTSDEKVAESLGVVCGCAFLITVFIFIPIPYIALWLERGKYTFPHHEFVEHISALLSICCMILLGFSDDVLNLRWRHKLILPTIASLPLLMVYLVNFGSTTIIVPKILHAYVGNDLNLGFLYYVYMGMLAVFCTNAINIYAGINGIEAGQSLVIGLSVMTFNIIELNGASPDAHRFSLYFIMPFCAVTAALLFHNWYPSRVFVGDTFCYFAGMTFAVVAILGHFSKTMLLFFIPQIFNFLYSCPQLFGLVHCPRHRLPKFNPKTGLLGMSFAHFKSKDLNFLGRLCLRLFRLFGLLHVEESNGEGKEYMQVNNLTIINLLLKYIGPTREPVLTTYLLIIQVLCSGLAFLIRYKIAGI…
PF00953	Bflo_Metazoa	PLVINTCLSALGMLVTLKVIPQFGEVFMKAGFKGKDLNKAVQKEIPESAGMISGAMFLIIMFLFIPFPFLEYWVSVKPQAHHEFPHADFVEFLGALLSISCMIFLGFVDDALSLKWRHKLWLPTIASLPLLMVYFTTFDLTTIIVPKPFRPFLGLSIDLSLLYYVYMGMLAVFCTNAINILAGINGVETGQSLIIGLSITLFNLLELSGDFSEDHIFSLYFMIPFCAVSFALLYYNWYPSQVFVGDTFCYFAGMTFAVVGILSHFSKTMLLFFIPQILNFLYSCPQLFRLVPCPRHRLPRFDAKTGKLGMSYSRFKTSELNSIGALILKVCSIFHIADVRSGVGEDKQYTECSNLTLINFVLYVLGPTHERTLTIYLLTIQVLGSMAAFFIRYQLAKIF…
PF00953	Xtro_Metazoa	VPLLLNVAGSVLGGLATATLIPAFKEHFIAARLYGTDMNKMTKEPVPESQGVISGAVFLLILFFFIPVPFLSCFVEEQCKEFPHHEFVALIGSLLAICCMIFLGFADDVLNLRWRHKLLLPTAASLPLLMVYFTTFGNTTIVVPKPFRPLLGLHVDLGILYYVYMGMLAVFCTNAINILAGINGLEAGQSLVIAGSIILFNIAELNGDFHDDHLFSLYFLIPFFFTTLGLLYHNWYPSRVFVGDTFCYFAGMTFAVVGIVGHFSKTMLLFFIPQVLNFLYSLPQLLHIIPCPRHRLPRLDPTNGKLGMSYSKFKSKELSKLGDLIIKVGEVLYVLDVKRAQGEDGQYVEVNNMTLINFVLKLTGPMHERNLTVLLLFIQVLGSCAAFLVRYQLVRLFYDV
PF00953	Skow_Metazoa	MNWPLLINIALSTAGFLATFIIIPNFYQVFIDAGMFGRDLNKTSKAKVPEALGVICGAVFLMVMFLFIPVPFLEIFLADKWEKFPHHEFVEFICALLSICCMIFLGFADDALNLKWRHKLLLPSMASLPLLMVYLVNFGNTVIIVPKPLRFLLGIEIDLFILYYLYMGMLAVFCTNAINILAGINGLEAGQSLVIALSIVTFNSVELSLYIMMPFIGVCAALLYYNWYPSRVFVGDTFCYFAGMTFAVVGILGHFSKTMLLFFIPQIFNFIYSIPQLFHFVPCPRHRLPK
PF00953	Dpul_Metazoa	LVVNIILSIMGYSVILNIVPKFKDMFVKAHLSGVDLNKKNKPELPEATGVITSCIFLIVMFIFIPFPFSKHFFNKEWGFPHQEFVQFMAALLSICCMVLLGFADDVLNLKWRHKLLLPTVASLPLLMVYYTNFNSTTIIIPKPLRFLLGHDLDLSALYYVYMGMLAVFCTNAINIYAGVNGLEVGQSVVIAASLILFNVIELNGDCWTNHLFSLYFMIPFFFTSFALYHLNKYPARVFVGDTFCYFSGMTVAVVAILGHFSKTALLFFIPQIANFIFSLPQLFHILPCPRHRLPRLNQDTGCLDPSVFPFKEKSLNSLGRLVLKVYQMLGLIKVERTDKDKELSTGTNCTLINLALKVVGPTHEKNLAAYLLALQVVCSMLAFVIRYPLASLFYD
PF00953	Apar_IchthyosporeaIchthyophonida	LAAYQMIPGVRQLFLDAGRKGKDLNKPGQPEIPESLGMVVGVCYLVCMFLFIPYAFLEYFINDNKPFPHAAFVEFLAALLSICCMTFLGFADDVLNLKWRYKLILPTVASLPLLMVYYVNIGSTTISVPRQLRPYLGQDLDIGPVYYVYMGMLAVFCTNAINILSGVNGLEAGQSLVIGVSIMANNWVQLGGSNRHQHLLSLYLLGPFVATTAALTLHNWYPASVFVGDTFCYFAGMTFAVVGILGHFSKTVLLFFIPQVLNFLYSVPQLFRLLPCPRHRMPRLNAKTGLVECSMAEFKASELRRPGHLVLAILGALRLATVIKSPLPGGDTQVRVSNLTLINFFLHALGPMREDTLCLRLLIFQGLCSILAFYVRYVAVYMVYD
PF00953	Sarc_IchthyosporeaIchthyophonida	FSEFIAGLLSICCMILLGFADDVFDLKWRYKLVLPTIASLPLLMVYFVNVGSTTIVGFLYYVYMGMLAVFCTNAINIYAGVNGLEAGQSVTTAKYTWWSFFPASVFVGDTYCYFAGMTFAVVGILGTFSKTVLLFFIPQVLNFVYSTPQLFRLIPCPRHRMPRLNKETGLL
PF00953	Ihof_IchthyosporeaIchthyophonida	ACHQMIPRVRQLFLESGLKGRDLNKPDQPEVPESMGMIVGVCYLVCLFIFTPYFFLDYFVGWKDPHSFPYDTFVKFLAALLSICCMTFLGFADDVLNLKWRYKLVLPTIASLPLLMVYFISSGSTTISVPRQLREILGDDLNIGGLYYVYMGMLAVFCTNAINILAGVNGLEAGQSFVIGVSIMANNFIQFHGPNHKEHMLSLLLLGPFVATTAALLCHNWYPSSVFVGDTYCYLAGMTFAVVGILGHFSKTVLLFFIPQVLNFLYSTPQLFRLIPCPRHRMPKLDIKTNKLDNSFSVFKMSELTPIGQRILAVITTFRLARIIKKELPKGDIEVSLSNLTLINYVLYVNGPLREDHLCMALLALQVMGSVLAFYIRYVAVMYVYD
PF00953	Ihou_IchthyosporeaIchthyophonida	MVYFISSGSTTISVPRQLREILGDDLNIGGLYYVYMGMLAVFCTNAINILAGVNGLEAGQSVSPSCLLLNLLPSLYMVLTGMVYAVYRYPSSVFVGDTYCYLAGMTFAVVGILGHFSKTVLLFFIPQVLNFLYSTPQLFRLIPCPRHRMPKVVSLSNLTLINYVLYVNGPLREDHLCMALLALQV
PF00953	Nk52_Ichthyosporea	SSIAMYACLKIIPQAKELLVAGGLFGIDLNKKTYDSSKSKEENARHRIPESMGIIVGVVYLVCMFMFIPVPFMFNGYVKKMLEKNWLFSNVIQSPIFDVDSDFLPRSSDMNSTESFPHSKFVQFLSGLLSICCMVLLGFADDVLNLKWRHKLILPTVASLPLLMVYFVNGGVTHVMVPKFLHSVLNTTSIDLGILYYMYMGMLAIFCTNAINILAGVNGLEVGQSVVIGLSVIANDLIQLKGGYDYSRDNHLFSLYFMIPFVATSLALMYFNWYPSAVFVGDTYCYFAGMAFAVVAITGHFSKTMLLFFIPQVINFLYSVPQLFRLIPCPRHRLPRLNKSTNKLEMSKHQFYMQDLPGPGRLIVRVCYMFNLASVTFPEHKKNKVGVDWSGRKLLVEMN…
PF00953	Aque_Metazoa	IKNFKDMFIKAGMFGKDLNKTSEEKIPEGLGVVSGAMFLISCFLFIPIPFLDYSELQFTQFICALLSICCMIFLGFADDVLDLRWRHKLFLPTIASLPLLAVYFVSGGSTTIIVPIPLRPLLGYDLHLGVLVYIYMGMLAVFCTNAINILAGVNGVETGQSVIIGTSIAVFNVIEIARDQFAAKHLFSLYLILPFIAVSLALLRHNWYPSKVFVGDTLCYFAGMTFAVVAILGSFSKTMLLFFIPQVFNFLYSVPQLFGIIPCPRHRLPKFDRATGLLGMSYAKFSPDQMGPGGAALLKTLSFLRLAKVEWSPPSGKEKKAEISVNNLTIINYLLKFIGPTHERTLTIYIMTVQVVGTIIAFSIRYGFVRFFYDV
PF00953	Mvib_Filasterea	VSTLRLVPAMSSLFVKAGLFGRDLNKVSDAKVPEALGVVAASSYLVSMFLFLPVPFISTWVTHSQFPHAKFNEFIAGLLSICCMIFLGFADDVLNLRWRVKLILPTLASLPLLIVYTVTFGSTSVALPQWVGPYLGTDLSSVDLGVLFYLFMAMLSVFCTNAINILAGINGIEAGQSLVIALSILCHNIIQLEDEWSWEHQFSLYLILPFIGTTVALLFHNWFPSRVFVGDTFCYFAGMTFAVVGILGHFSKTLLLFFIPQIFNFVYSLPQLFHLIPCPRHRLPKLNRETGLLEMREFSFAVTDLSFVGKLCFHTIRILRLAPVKMDSEGNVTMANLTIINFVLRMRGPTSEPALTATLLLIQCLFSICAFVVRYELSKWFY
PF00953	Colp12	LFMSAGRIGMDLNKADKVKIPESMGFVSSTVFLICMFFFIPFPFVSWIFEGEQPPPVFPYHKFTEFLSGLLSICCMVLLGFADDVLNLRWRHKLFIPTIATLPLLMVYFVNEGSTVVIIPKPMRFFLPTAVDLGILYYIYMGMLAVFCTNAINILAGINGVEVGQSAVIGISLLINNVLQLDGAYAESHRFSLYLLLPFVGTTLALLYHNWYPSRVFVGDTFCYFAGMTFATVGIHGKFSKTVLLFFIPQIANFLYSLPQLFHLLPCPRHRMPSFDAKSNTLRPSTAVFKRSELSLPGRLCLKVLQTFRLIDVKEAKGEVQMSNLTLINFVLRFTGPVHERTLTIVILLLQAASSVLAFLIRYQLVKLFYD
PF00953	Awhi_IchthyosporeaIchthyophonida	VLQLAAIGATGVFCAAVVLKGWHSALAANFVLSGFGFLACLRVIPASTRLLIDAGCFGKDLLKKDQPTIPESLGLIVAAVYLMIMFVFIPFPYEELLDSTKEFPHNEFVELVCGLLSICCMTMLGFADDVLNLKWRYKLVLPTIATLPLLMVYHVNEGSTTILLPNFCHGLAETITLGPLYYIYLSMLGVFCTNAINILAGVNGIESGQSLIIGVSIMIHSIADLWLNGSDTHQLSIFFITPFVATTAALCYYNWFPCTAFVGDTFCYFAGMTFAVVGILGRCKMTVLLFFIPQILNFLYSVPQLFRFIPCPRHRMPRLNEESGNLKNSVCVFKPTELKSLGKILFAIIKLLRLAKISENAKDGTVTMSNLTLINYVIYIFGERREDKVCTILLVIQIL…
PF00953	Ocar_Metazoa	LLCNAVLSVFAFFIAKQLIPSMCPNFLKAQLFGRDLNKTSKDPVPEGLGVVCGTVYLVAMFLFIPIPFFIAWLLKGPHPFPHDQFVVFLAALLSICCMILLGFGDDVLNLPWRHKLILPTVASLPLLIAYLVTINRTVIVVPHPLQFLLGSHIQLSVLYYIYMGMLAVFCTNAINILAGINGVECGQSVVIAASVITFNLIELSCNHLFSLYLLLPFVGVSLALLHHNWYPSSVFVGDTYCYFAGMTFAVVGILGHFGKTLLLFFLPQIVNFLFSVPQLFHVIPCPRHRLPKFNPDTGLLEMSYSEFKERDLGPMGQFLIKLIEFLRLADVKRGRGKEGDEIWVSNLTLINFVIKFVGPIKEDKLTMIMLAIQVVGSLMGLFIRYPLAWIFY
PF00953	Sdes_IchthyosporeaDermocystida	FVEFMSALLSVCCMLLLGFADDVLNLKWRHKLLLPTFASLPLLMVYFVNSGVTYVTVPFVLKPLLGDIVDLGIFYYVYMGMLAVFLTNAINILAGVNGLEVGQSVVIGVSILVNDVIQIKGGYDFSRDNHLFSMYFMFPFVACSLALLYFNWYPSSVFVGDTYCYFAGMTFAVVAITGHFSKTMLLFFLPQILNFLYSTPQLFRLIPCPRHRLPSLNRSLNLLQMSVHRFPASQLSFSGRWVVFILDFFHLVHIEWFLPKGKVPSKWIPFERPKNTRISTLLASHPDLWIQMNNLTIINFALKLLGPLHEKRLCVVLLVFQSVCSIFALIFRYQFAKLFF
PF00953	Cowc_Filasterea	IPTPLAINAALSVAAFIATLQLIPALSSLFVNAGLFGMDLNKPIQNRVKVPEALGVICGAVYLICLFFFIPFPFIENLPDDVAEPVSDALLLHDGDRAAANAAYEALVVLHNEKNQRMFRSFLGALLSICCMIFLGFADDVLNLRWRHKLMLPTIATLPILMVYFANHGVTSVIFPKFAMPFLPSFMLQSDQTVFLGPLYYVFMGMIAVFCTNAINILAGINGLEAGQSIVIAISIAINNAVQIFLIQDADVQNHLFSLYLMLPFIATTAALLWWNWFPSRVFVGDTFCYFAGMTFAVVGILGHFSKTLLLLFIPQVLNFVYSLPQLFHLVPCPRHRMPKFDPATGLVGNSHAYFKMSELSGVGRIIVTTMRIFRLVTYKE
PF00953	Mbre_ChoanoflagellataCraspedida	LAFVAASLTFRLIPAVSEMFIKAGLSGIDLNKHEKLKKKVPEAIGVVAATIYLIVIFLYIPFHFRAYLLVEQQGTDGFPHDKFVAFICGLLSICCMIFLGFADDVLNLAWRHKLLLPTLAALPLLIVYKVTGGSTTVILPIFARPFLGHTLDLGVLFYIYMGMLSVFCTNAINILAGVNGIEAGQSLVIAVSLVVNSIIQIIGTEYHEGHQLALCLLMPFCGVTAALLWHNWYPSNVFVGDTFCYFAGITFAVTGILGHFSKTLLLFLMPQIFNFVFSVPQLFKLIPCPRHRLPKYDQSTGLLTMSYATFATSSLSRPGRLVLDIVRVTGLCHVRPNPEQPELTDVSNFTIINLVIKMVGPIHEEKLTTYILMLQVASSVLALAIRYPFGNMFFD
PF00953	Sros_ChoanoflagellataCraspedida	FVEFVCALLSICCMIFLGFADDVLNLAWRHKLWLPTVASLPLLMVYYVNVGSTWVLVPPFMREWVGGETINLGYLFYVYMSMLAVFCTNAINLLAGAQGIELGEGLVLRLGLLIALLLQLPFCGVTAGLLRFNWFPSSVFVGDTFCYFAGMTFAVAAILGHFSRTLLLFLAPQTFNFVLSVPQLFKIVPCPRHRMPRMVGLVRVVESTDERLVVTNFTVINTVLTIAGPMHERNLVMCILFIQVVCSVVALALRF
PF00953	Dcos_ChoanoflagellataStephanoecidae	TLVLIPQCTSLFISAGLFGRDLNKPLPPGVTDKADAPKVPESLGTVTAAIYLIVMFLYIPVHFNSFLSDGNRKDFPHNEFVEYIAALLSICCMIFLGFADDVLNLKWRHKLLMPTIATLPLLMVYYVNFGSTTVIVPWFLRGWLGLSINLGVLYYCYMGMLAVFCTNAINILAGINGIEAGQSLVIAISVLIHNWIQLKMGAPGHQNHILSIVLISPFAGVCAGLLYHNWCPSKVFVGDTFCYFAGMAFAVAAILGHFSKTMILFFIPQVLNFLLSIPQLFKIVPCPRHRLPKYQKDDGLLHNSCFTVKKKDLSPLGTKIVLALKSVKLISYKEHTDADNVVHCEMSNFTLINVAIRLLGPKKEEHLTSYILLFQALCSCLAFYIRYQGALLLYE
PF00953	Hnan_ChoanoflagellataAcanthoecidae	SVMAFVVTLRLIPNFFELFINAGLFGKDLGKANKPQVAEALGTIAAAVYLITMFLFVPVQYSLTEASVEEVAGQVRHQAVRPEGSEFVELTCALLAICCMVFLGFADDVLNLKWRHKLLLPTVASLPLLVYYFASFGSTTVVMPNFVRPYLGHTVDLGVLYYLYMGMLAVFCTNCVNILAGINGVEAGQSLVIAISIVIHNLVQIMSGADDFANHQLSIHLVLPFVGVTAALLYHNWYPSQCFVGDTFCYFGGMTFAVAGILGHFSKMLLLLNIPQVINFVFSVPQLFKFVPCPRHRLPKLNTETGLLEPSTATFKPTDLHPIGLVIVNTCAALRLTSFRKFEDKDGVVQIEVSNYTLINLFLRMFGPTHERTLCTRLLIFQAICSGVAFFIRYKLSQV…
PF00953	Cfra_IchthyosporeaIchthyophonida	SWFTICIQQTKLVSSDIFRPESVGVIVGAVYLVFMFCFIPFAFARHFSDPYHVNDFPHDKVSAESSIYVSDDVFDLKWRYKLVLPTIASLPLLMVYYVGGMSTTIIPPFFRQYIGESMNIGYLYYLYMSMLAVFCTNAINIYAGVNGLEAGQSLVIGVGIAMNNVVQLNGDNHEQHLYSLYMMGPFIATTAALLYHNWFPASVFVGDTYCYFAGMTFAVVGILGTFSKTVLLFFIPQIANFLYSVPQLFRLIPCPRHRMPRINKETGLLEASKNVFLLSEIKAPGRVITRFILASGLARATSTPAGKDGDMQITMSNLTMINLCLDI
PF00953	Mlei_Metazoa	LCVSIGTGIISFLITWYLIPELSNLFLSANLAGKDLNKRLNDYRVPEGVGVIAGAIYLVCLFCIIPFYVLHSKDDVSSTMLTNLSLFLSALLSICCMILLGFTDDVLNLRWRHKLVLPTIASLPILMVYYVTYGNTYIVMPFPIPQLLNVNVFDLGFLYYVYMGMLSVFCTNAINILAGVNGVECGQSIVIALSVLLNSLINLGSECWSEHMFALYLVCPFIGVSCAVLYYNWYPSRVFVGDTFCYFAGMTFAVLGILGHFSKTMLMFFIPQIFNFVLSVPQLFHLVPCPRHRLPRLHPTEDVLVMSTVKFKRSDVGSLGSLCLFILPKMGLTKMIVDDEEQITITNLTILNVILRVMGNTHERTLTIYLLFLQL
PF00953	Clim_Corallochytrea	SPVALSGLLSVLAFLFSYQMIGITGPHLIAAGLSGKDMSKKKSKRDKEGEDSRVIPEAAGLVAGAVYLGIMFLFIPIPYAHSIMDHTLGSQPTDANVPSIISAEGSEMRTFAAFIAGILSICTTLFLGFVDDVFDLKWRHKLQIPTLASLPLLMTYFANGGLTDIAVPRFLQPLFGGVTFFDIGPLYYLYMGMLAVFCTNAINILAGINGLEVGQSLVIGVSILVNDAVILIFGSPEAHDLHQLSVYFLLPFVGVSAALWLYNKYPAQVFVGDTYCYFAGMTFAVVGILGHFSKTVLLFFIPQIMNFLYSTPQLFRFIPCPRHRLPRFVPKRNHLDVSWAFFRESELKAPGRVVLSVLRRLRLVKFYRSKQDSDYVACSNLTLLNLALHICGPLHEAKL…
PF00953	Clii_Corallochytrea	PVALSGLLSVLAFLFSYQMIGITGPHLIAAGLSGKDMSKKKSKRDKEGEDSRIIPEAAGLVAGAVYLGIMFLFIPIPYAHSIMDHTLGSQPTDANVPSIISAEGSEMRTFAAFIAGILSICTTLFLGFVDDVFDLKWRHKLQIPTLASLPLLMTYFANGGLTDIAVPRFLQPLFGGVTFFDIGPLYYLYMGMLAVFCTNAINILAGINGLEVGQSLVIGVSILVNDAVILIFGSPEAHDLHQLSVYFLLPFVGVSAALWLYNKYPAQVFVGDTYCYFAGMTFAVVGILGHFSKTVLLFFIPQIMNFLYSTPQLFRFIPCPRHRLPRFVPKRNHLDVSWAFFRESELKAPGRVVLSVLRRLRLVKFYRSKQDSDYVACSNLTLLNLALHICGPLHEAKLM…
PF00953	Bden_FungiChy	PLVVSVILAVLAGILTERVIPLVAPIFIKAGRHGKDILKKDQPVIAESIGAVVGVAYFIAMFIFIPIPFLDWFLHDKYSDPSDHQPFPHDRFAQFLGGLLALLAMLFLGFADDVLDIRWRIKIWFPFIASMPLLMVYCVTYGITDVVVPIPLRLYYVYISALTVFSTNSINIMAGTNGVEGAQSLVIAISLAVNDLLQLQLNPARAKAHSNSLYFLIPFIGVTIGYLRHNRYPARVFGGDTFTYFAGMIFAVVGALSNLSKTVLLFMIPQIFNFLYSCPQLFHFVDCPRHRMPRFDEKTGKVYARRFLLANSKFLGRLMVRFLEMIGLADVGRDKHGNMVDCNNLTIISIILVRCGPMSERNLAVVVVFVQVVCSLVAFFIRYALVHIVYN
PF00953	Spun_FungiChy	PLVVSLCLSVLAGLGTYKAIPLVSDVFIAHGRSGKDLLKEGRPVIPESMGAIAGVVYFIVMFVFIPVPFIGWFRDSEYALADFPHNKFAQFLGGLLSLMSMLFLGFADDVLDIRWRVKIWLPLIASMPLLMVYCVTYGGTDVVVPIPLRSLFGQKMLHLGIFYYAFMAALAIFSTNAINILAGVNGVEAGQSLVIALSIAANDFLQLHRNPARAEAHLTSLYFVLPFIGVTLGFLKHNWYPARAFGGDTLCYFAGMIFAVVGILGNFSKTVLLFMVPQIFNFIYSCPQLFHFVECPRHRMPSYNSSTKLLEPTWCSLSKTGKLGRLMIRILRTFRLVHIRRDPKTGEAVQANNLTLMNLLLVKFGPMSEPRLATFVMIVQALCSCLAFLIRYRLVKFVYN
PF00953	Amac_FungiBla	VPPPLVACAILSVGAALAVNAMIPRVSATFIQCRLMGADLAKRNKPVLPESMGLVCGLVYLLTLVLLLPVVFMTWSTHSGSMTMHKFATFLSALLSIQSMLFLGFADDVLNIRWRHKIFLPALAALPMLLVYGIESGVTYVVVPLPLRAYLGRIVDLGLLYYLYMALVAIFCTNSINILAGINGVEAGQSLVLAVSLVINSTAILASSANPETREIHAQSLYLLLPFIGVTAALLKWNWCPARAFVGDTYTYFAGMVFAVCGILGHYSKTLLLFFAPQIVNFVLSVPQLFHVVPCPRHRLPTLHPSGTTLVYSRCRVPRAQLSCLGAFVLRVLAVCGLAKVETTNEWVTFSNLTLINAVLVVXXGLEEGTLAAIVLGIQVVGSLIAFVVRYALV
PF00953	Cang_FungiBla	KFPSYLSALLSISAMLFLGFADDVLNIRWRHKLFLPAFAALPMLFVYAIESGVTWVVVPAPLRSLSFTPDGSIVDLGFLYYVYMLLVAIFATNSINILAGINGVEAGQSLVIALSLILNSLVLMLSTTNPVTVQTHLFALYLLVPFVATSAALVKFNWFPARVFVGDTFTYFAGMVLAVVGILGHFSKTLLLFFLPQIFNFVLSVPQLFHLVPCPRHRLPRRNDSHPRETLLQFSTTTVPLANLSRPSHALLTLVSNLGLTHVVYHKVKDKDSVTFSNLTLINAVLVTLQQAQVAPDGVPEDVLCKLVIGLQVVASCVGFLVRYGLAGIVY
PF00953	Pgem_IchthyosporeaIchthyophonida	FAVAFVVAIVATKDFHSAVAANFIISIFAFFGAMKMIPGSAELFMKAKCYGEDINKPNRPKIPESQGLVVGSIYLISMSLFIPFPYEELLDSTKEFPHNEYVEYVCGLLVICFMILLGLADDILELRWRERIVIPSIAFLPLLMVYHVNKGLTSIMLPNFLHETVGRSYIDLGYFYYVAVCLTGIFCTNSINILAGVNGLEAGQSLVIGISIMINDWINIWNNESSEHQLSLYFITPFVAVTLALTYHNWYPASVFVGDTFCYFAGVTFIVCAILGHFTKTIYLFFIPQLLNFVYSLPQLLKFIPCPRHRMPRLNEENGKLKISYSTFKPSELKTLGRICFGIFKTLRIVKVIEEKDGTVKMSNLTLINYFIYLFGEMREDMVTISLLIFQTLCSCMGF…
PF00953	Rall_FungiCry	GRDLLKKDKPMLPESLGVYVAGLYLIVLTLFIPINYLGKANHSTLVSYLSALLSICCMILLGFVDDVLDLRWRDKVFLPAVASLPLLLVYFVNEGITYVTVPIPFREYFGNYIDLAIFCTNSINILAGINGLEVGQSVVIAIFIMLHNIIQIMLNISPQLCENNYFSLYMLIPFTTLSLTLLKYNWYPAKVFVGDTYCYFAGMTFAVVGILGHFSKTMMLFFLPQIFNFVFSVPQLFKMVPCPRHRMPNLNVTSGKLENSFAEFDLSEVNIIGLICIKILRALGLIDLKKAANEERVIISNFTILNSCLIWFGSLSERDLAKLMIFLQIFACLFGLSVRYGFSNLLY
PF00953	Ccor_FungiZyg	LSGKDLLKKEKPILPECLGLISSVFFLINLYCFIPIPFSHNLKYEELFHIKDFPHIQFAQFLSGILSIQSMVLLGFCDDVFDVKWRYKIFLPSIASVPMLMVYFISEGVTTVVIPYPFKKYLGDFVNLGVLYYVYMAMMATFCTNAVNIVAGINGVEVGQTLVIAVSTLILSLLTNSLRWGFYTLLLFNKYPAKVFVGDTYCYFGGMVLAVVGVLGHFSKTMLLFFGPQIFNFLLSAPQLFKLIPCPRHRMPKLNSETGKLEPSETEFEKPLTSLQTLILTILSKLSIVKLTADLKTGRILKSTNFTILNCLLVIFGPLREDELFAKMMQVQIGWSCISFGIRYFGAQLFY
PF00953	Spom_FungiDik	PLLSNVGLSVLAYKATAMFIPRVGPSFIKRGFSGKDMNKVEKYVIPETMGAVSALVYFMCMIIFIPVLFYKYLVPNHNPNLPSDGSVAEVAKSQFPHDLLGAYLSALLSILSVSLLGILDDLFDIRWRHKFFLPAIAAIPLLVVYYVDYGVTYVSVPSIVRPFLKRSLINLGFLYYFYMAAVAIFCPNSINIIAGVNGVEAGQSLVLALVIACNDLFYVLSPKNKDALRAHLLSLYLVLPLIGVTAGLLKYNWWPSRVFVGDTFCYFAGMVMAVVGILGHFSKTLMLFFIPQIFNFALSVPQLFGLVECPRHRLPKLNVKTGLLENSYTEFSLNEHPLPKKTLLTISIFEKLRLIRVEYDPSTGRPLRCTNFTIINFVLYHLGPMREDHLTICIMGLQL…
PF00953	Cneo_FungiDik	SNVPLPEQPTLPALQANIGFALLAFVGAVWIVPRVSGAFVEKGLRGRDLLKPGGRTSGPWIPESLGLPCASWYIALMMLFIPFPFSHLFQGGMLEVFPQRELTLYLSSLLSLLTATLLGFIDDLFDIRWRHKLPIPIVAAVPTLLVYYSVGGATSVVLPQGVVGWARTMGMGEWVDNGVVDLGPLYYIYLILLPTFTTNSINILAGINGVEVIQALLIALSVILNDLLFLPIWPERFLRLLGVGQPENGRVLEWAMGEVVDRHLMSLYFMAPLAGVCAGFLWHNWYPARAFPGDTFCYFTGMAFSAVAIQGHFSKTLVLFFIPQIFNFVLSCPQLFGLVDCPRHRLPSFDAETGLLHPSRVIFENPPPTKTRISLKILECLRLVRLERSKPSKEYQQIH…
PF00953	Umay_FungiDik	LFAALGLSLVGYWAASVAIARTKDVFFARGFKGRDLLKHKLEPIPESLGLPTAAVYMGVLFVFIPFRYFSSRPQRVYKTADDWQGRMDGRLGFPHHELATFLSALLSFLSAIVLGFLDDVFDIRWRYKLPIPIISSIPLLTVYYAGGGATSVVVPGWPGVLRRWMGSSILELGPLYYLYMSLLSTFCTNSINIIAGINGVEVGQAIVISISLCINSLLYLDSRAGMQGSRSSTELLRRHLFSLYLLLPLTAVCMALFSWNYPARVFVGDTFCYFAGMVFSTVGILGHFSKTVLLFFVPQIFNFVLSCPQLFGLVPNPRHRVPRYHAETNSLYPSIQYF
PF01015	Acas_Amoebozoa	KNKKLSKGGKKGQKKKKEWYNIKAPSVFRSRNVGKTPVNKTAGTSTASDALLGRIVEVSLADLNKDEDQAFRNIKLRIEDVQGKDVLTNFHGMNFTTDKLRSLVRKWQSLIEAHVDVKTTDGYYLRIFAIAFTKRRPNQQKRTCYAQSAQIRQIRAKMVQIIVRESTTVDLKDLVVKFIPEAIGKMIERECNGIFPLKDVYIRKVKMLKTPKFDAAKLAELHAGGPAAAEDLGAKVERTEEAPKEES
PF01015	Pbif_Breviatea	MAVGKNKRLSKKGKGSKKKIVDPYTKKEWYDIKAPAAFRNRQVGKTLVNRTAGTKLAADGLRGRVFEVNLGDLNGDDDLAFRKIKLRCEEVQGSNCLTYFHGMDFTTDKLRSLVKKWQSLIECHVDVKTADAYILRVFAIAFTKRAQGQIKKTSYAQSSQIRTIRKKMTEIITRECSACDLKDLVSKLIPEVMGKEIQKTCESIYPLQNCYIRKVKVLKAPKFDITRLMEAH
PF01015	Clim_Corallochytrea	MAVGKNKRLSRGKKGQKKKIIDPFTRKDWYNIKAPGLFSVRDVGKTLVNRTQGTKIASEALKGRVFEVSLADLNKDEDQNYRKMRLVCEEVQGRNILTNFHGMDFTTDKLRSLVKKWQTLIEAHADVKTLDGYVLRMFCIGFTKRRPMQVRKTSYAQSSQIREIRRIMVEHMTRESTVCDLKDLVKKFIPEQIGKDIEKQCESVYPLQNVFIRKVKILKKPKFDVTKLMELHGGDLGGEDLGTGVPRGDFVEPAPQESV
PF01015	Clii_Corallochytrea	MAVGKNKRLSRGKKGQKKKIIDPFTRKDWYNIKAPGLFSVRDVGKTLVNRTQGTKIASEALKGRVFEVSLADLNKDEDQNYRKMRLVCEEVQGRNILTNFHGMDFTTDKLRSLVKKWQTLIEAHADVKTLDGYVLRMFCIGFTKRRPMQVRKTSYAQSSQIREIRRIMVEHMTRESTVCDLKDLVKKFIPEQIGKDIEKQCESVYPLQNVFIRKVKILKKPKFDVTKLMELHGGDLGGEDLGTGVPRGDFVEPAPQESV
PF01015	Colp12	LVDPFTKKDWYDIKAPSLFTNRQVGKTLVNRTAGTKIASDALKGRVFEVNLADLNNDEDQTHRKIRLVVEDVQGKNLLTNFHGMDFTTDKLRSLVKKWQTLIEAHADVKTTDGFVLRMFCIAFTKKRPNQLRKTSYAQHSQIRAIRRNMIDIMTREAQSVDLKSLVAKFVPELIGKEIEKACNSIYPIQNVFIRKVKLIKKPKFDVGRLMELH
PF01015	Nspp_Discicristoidea	MAMGKNKRLSKGKKGKAGQKKVDPFTRKDWYDVKAPSTFKVRNVGKTIVNRTAGTKLSSDGLKGRVIEVSLADLNQDEDQTHRKMKLRIDEVQGKNCLTNFHGMDYTSDKVRSLVRKWQTLIEAHVDAKTTDGYVLRLFCMAFTKRRPNQLRKTSYAQTSQIREIRKKMMEIMTKEVVNSELKEVVLKFIPESIGKAIEKTCSAIYPLQNVCIRKVKIMKSPKFDVSKLLELH
PF01015	Bden_FungiChy	MAIGKNKRLSKGKKGLKKKTVDPFSRKDWYDIKAPVTFDVRNVGKTLVNRTQGLKNAKDYLKNRVLEVSLADLSNNQEDSFRKVKLQIQEVSGTNCLTNFHGIDITSDKLRSLVKKWQSLIEAYVDVKTTDGYLIRIFTIAFTQRRKNQLRKTTYATSAQIRAIRKKMFEIVTKEATSCDLKEFVRKLAPEVIGKAIEKQCQNIYPLQNTMVRKVKILKAPRFDLGKLLELHGERGDDKGFKVVPGSKEYKEIAILDSV
PF01015	Spun_FungiChy	MAVGKNKRLSKGKKGLKKKVVDPFSRKDWYDLKAPSFFEVRNVGKTLVNRTQGLKNANDALKGRVFEVSLADLNNNQEDSFRKVKLQVQEIQGKNCLTNFHGMDFTSDKLRSLVKKWQSLIEAFVDVKTTDGYLLRLFTIAFTQRRKNQQRKTTYATHAQIRAIRKKMFEIMTREAASCDLRELVQKFVPEVIGKEIEKACQGIYPLQNVYVRKVKILKAPKFDLGKLLELHGE
PF01015	Rirr_FungiZyg	MAVGKNKRLSKGKKGLKKKIVDPFTRKDWYDVKAPSIFEVRNIGKTLVNRTQGLKNANDALKGRVFEVSLADLNKDEEQAFRKIKLRVDEVQGKNLLTNFHGMDFTSDKLRSLVKKWQSLIEAHVDVKTTDGYLLRLFAIAFTKRRPNQVRKTTYAQSSQIRQIRKKMFDIMTQQAATCDLKELVLKFVPESIGREIEKACQGIYPLQFVYIRKVKILKSPKFDVQKLMELHGDNIDTGSKMGGSGDFKEPEIQESV
PF01015	Mver_FungiZyg	MAVGKNKRLSKGKKGLKKKVVDPFTRKDWYDIKAPSTFDVRNVGKTLVNRTQGMKNANDALKGRVLEVSLADLNKNEEYSFRKVKLRVDEVQGKSCLTNFHGMDMTSDKLRSMVRKWQSIIEAHVDVKTTDGYLLRLFAVAFTKKGVHQVKKTTYAQTAQIRQIRKKMFEIMIAQATSCDLKELVHKFIPEVIGNEIEKSCKNIYPIRDVFIRKVKILKAPKFDLGKLLELHSGADNETGAKVERKDFKEPEVLAEV
PF01015	Pisp_FungiNeo	MAVGKNRRLSKGKKGLKKKIIDPFTRKDWYDLKAPAIFPKRDIGKTLVNRTQGLKNSSDYLKGSVVEVSLADLNENQEDAFRKIKLRVDEIQGKNCLTNFHGLGITSDKLRSLVKKWQSLVEAYIDVKTTDGYLLRVFIIGFTQRRKNQLRKTTYAQTAQIKQIRKKMFEIVTAEATTCDMKDFVSKFAPEIIGKRIEKATQNIYPLNNVLVRKVKILKHPKYDVGKLMELH
PF01015	Cneo_FungiDik	MAVGKNKRLSKGKKGIKKKVVDPFSRKEWYDIKAPSFFENRNAGKTLVNRTQGLKNANDSLKGRVLELSLADLNNDQEQSFRKIKLRVEEVAGKSCLTSFYGMDFTTDKLRSIVRKWQSLVEAHVDVKTTDGYVLRLFAIGFTKRQSNQVKKTTYAQSSQLKEIRAKMVEIMRREAEGSDLKELVQKFVPESIGREIEKAAKGIYPLHNVYVRKAKIVKTPKIDMSKLLESHGEAMDTNTGSKVVKTGEFVEPEILESV
PF01015	Mcir_FungiZyg	MAVGKNKRLSKGKKGLKKKVVDPFTRKDWYDIKAPSMFDVRQVGKTLVNRTQGLRNANDSLHGRVVEMSLGDLSKDESRSFRKIQLKVDEIQGKNCLTNFYRMDMTTDKLRSMVKKWQSLIEAFVDVKTTDGYLVRLFTVSFTSRRRNQIKKTTYAQAAQIRQIRKKMFEIMTEEAVACDLKELVAKVTSSASQSAQDAIAVRIEKACQGIYPLQNTYTRKVKILKAPKFDVSALLALHGG
PF01015	Rory_FungiZyg	MAVGKNKRLSKGKKGLKKKVVDPFTRKDWYDIKAPSMFEVRQVGKTLVNRTQGLRNANDSLNGRVVEMSLGDLSKDESRSFRKIKLKVDEIQGKNCLTNFNGMDMTTDKLRSMVKKWQSLIEAFVDIKTTDGYLVRLFAISFTARRRNQIKKTTYAQSSQIRQIRKKMFEIMTEEASACDLKELVAKVTSSASQSAQDAIAVRIEKACQGIYPLQNTYVRKVKILKAPKFDVSALLALHGGAAAAGDDTGAKATKEFVEPPIQASV
PF01015	Gpro_FungiChy	MAQGKNKRLSKGKKGIKKKVVDPFTRKDWYDLKAPSMFENRQVGKTLVNRSQGLKNANDALKGRIVEVSLGDLQGPQNEANMDDAYRKFRLRVDEVQGKSCLTNFHGMDFASDKLRSLVRKWQTLIEASVDVKTTDGYYLRVFVIGFTRRRQNQLRKTTYAKTSQIKAIRKKMFEIVTKEGSNCEMKDLVAKFIPESIGKEIEKKTQSIFPLQNVYIRKVKVLKMPKFDLGKLLELH
PF01015	Apar_IchthyosporeaIchthyophonida	MAVGKNKRLSKKGKGTKKKVVDPFTRKDWYDVKAPSVFANRQVGKTLVNRTQANKIASDALKGRVFEVSLADLNNDEDQAFVKMRLVAEDIQGKNVLTNFHGLNFTTDKLRSLVKKWQTLIEAFVDVKTTDGYYLRLFVIAFTQRRKNQVRKTSYAQSAQIRQIRKKMVEIMTSEASSSDFKELVNKFIAGSFGTDIVKATRSIYPLQNVFVRKVKILKKPKFDLNKLMEMHGEAAVAEGGAKVARTGDFVEPKIQDSV
PF01015	Ihof_IchthyosporeaIchthyophonida	MAVGKNKRLSKKGKGNKKKIVDPFTRKDWYDVKAPTVFATRTVGKTLVNRTQANKIASDSLKGRVFEVSLADLNADEDQAFVKMRLVAEDVQGKNVLTNFHGLNFTTDKLRSLVKKWQTLIEAFVDVKTTDGFYLRLFAIAFTKRRKSQVKKTTYAQMGQIRQIRKKMVEVMTKECSGSDFKELVNKFIAGSIGQDITKATSGIFPLQNVFIRKVKVLKKPKFDLNKLMEMHGEASTSESGAKVARGDYVEPKIQASV
PF01015	Ihou_IchthyosporeaIchthyophonida	SEIASDSLKGRVFEVSLADLNADEDQAFVKMRLVAEDVQGKNVLTNFHGLNFTTDKLRSLVKKWQTLIEAFVDVKTTDGFYLRLFAIAFTKRRKSQVKKTTYAQMGQIRQIRKKMVEVMTKECSGSDFKELVNKLIAGSIGQDITKATSGIFPLQNVFIRKVKVLKKPKFDLNKLMEMHGEASTSESGAKVARGDYVEPKIQASV
PF01015	Cfra_IchthyosporeaIchthyophonida	MVGKNKRLSKKGKGSKKKTVDPFSKKDWYDIKAPSVFTQRNVGKTLVNRTQGIKIASDGLMGRVFEVSLADLNEDEDQAYRKMRLVVEDVQGKNVITNFHGMDFTTDKLRSLVKKWHSLVEAFADVKTTDGYYLRLFCIGFTKRQQHQVRKTSYAQSAQIRQIRKKMVEIMTSESLTSDFRELVNKFIAGSIGQDITKATHGIYPLQNVYIRKVKILKKPKFEHAKLMEMHGEASASTEGGSKVARSKDFVEPKPLDSV
PF01015	Sarc_IchthyosporeaIchthyophonida	AVGKNKRLSKKGKGSKKKTDPFSKKDWYDIKAPSVFTKRNVGKTLVNRTQGTKIASDGLMGRVFEVSLADLNDDEDQAYRKMRLVVEDVQGKNVITNFHGMDFTTDKLHSLVKKWHSLIEAFADVKTTDGYYLRLFCIGFTKRQPNQVKKTSYAQNAQIRTIRKKMVEIMTTESLTSDFRELVNKIAGSMGSDITKATNGIYPLQNVYIRKVKILKKPKFDHQKLMEMHGEASATSEGGVKVGNKDFVEPKPQESV
PF01015	Cowc_Filasterea	MAVGKNKRLTKGGKKGSKKKIADPYAKKDWYDIKAPSMFTTRQVGKTLVTRTTGTKIAADGLKGRVFEVSLADLQGGNEEEAHRKIKLCADEVQGKNLLTNFHGLDFTTDKLRSLVKKWHTLIEAIVDVKTSDNYVVRVFVIAFTKRRPNQVKKTSYAQHAQIRQIRKKMTDIITKEVSSADLKEFVAKLLPESIGKEIEKACQGVYPLQNVFVRKVKVLRKPKLDMGKLLELHGDSGASSEDTGAKVERGDFVEPAILASV
PF01015	Falb_Discicristoidea	MAVGKNKRLSKGKKGRGGKRVVDPFSRKDWYDLKAPSTFSNREIGKTLVNRTAGTKLASDGLKGRVVEVSLADLTSDVEHSFRKIKLSLEDVQGRNCLTNFHGMDLTTDKLRSLVRKWHSLIEAHVDVRTTDGYHLRVFVIGFTQRRSNQVKKTTYAQTSQILAIRKKMFEILNKEVSTVDLKELVAKLIAESIGKTIEKECKVIYPLHNVFLRKVKVLRKPKFDASKLMELH
PF01015	Rall_FungiCry	AIGKNKRLSKGKKGLKKKNRLIFSVDPFTRKDWYDIKAPSFFSQRTVGKTVVNRTQGLKNADDSLKGRVLELSLGDLHKDVEEHAFRKFKLKVEEIQGKNCLTNFNGMEITSDKLRSMVKKWQSLIEAHVDVKTTDGYLLRLFAIGFTARRKNQVRKTCYAQASQIRAIRKKMFEIMTRETVNCELKEFVTKLIPDTIGKEIEKATQSIFPLQNVLIRKVKILKAPKYDASKLLELHAEGSSSGSKVARTGGFKEPVPQESV
PF01015	Spom_FungiDik	MAVGKNKRLSKGKKGIKKRVVDPFSRKDWYDIKAPAFFEVKNVGKTLVNRTAGLKNANDSLKGRILEVSLADLQKDEEHSFRKVKLRVEDIQGKSCLTSFNGFDMTSDKLRSLVRKWQSTIEANQTIKTTDGYLCRIFVIGFTSRRVNQVKKTTYAQSSQIRAIHQKMFQVIQNQANGCSMKELVQKLIPEVIGRAIEKATNNIYPLQNVFVRKVKILKAPKHDAQKLLELHGESQDVG
PF01015	Ccor_FungiZyg	MAVGKNKRLSKGKKGLKKKVVDPFSRKEWYDIKAPSMFPVRNVGKTLVNRSQGMKNANDYLRGRVYEASLGDLNKDEENSFRKIRLRCDEIVGRNCLTTFYGMDFTTDKIRSLVKKWHTLIDAHIDIKTTDGYLLRLFAIGFTKRNPNQVKKTTYAQHSQVRAIRKKMFEIITEEATTVELKELVNKLILEVIGRKIETATKNIYPLQNVFIRKVKIIKSPKLDYQKLMELHGGAADEVGSKIDRSGFKEPKVQESV
PF01015	Umay_FungiDik	AVGKNKKLSKGKGQKKRAVDPFTRKDWYDIKAPTFFENRNVGKTFVNRSQGLKNADDSLKGRIVEASLADLNKDDEQAYRKFKLKVDGIQGRTCLTNFYGMDFTSDKLRSLVRKWQSLIEAHQDVKTTDGYLLRVFVIAFTKKRANQVKKNTYAKSSHIRAIRQKMFEIVQREANSCDLREFVAKLIPEVIGREVEKATQGIFPLKDVYVRKVKVLKAPKDDLNKLLEVHGGAAIAGAEDAGVKARNTEFKEPAPLASV
PF01015	Amac_FungiBla	VDPFSRKEWYDIKAPTIFAVRNVGKTLVNRTQGLKNASDALKGRVFDISLADLNTEAEEQAFRKIQLRCDEVAGRNLLTNFHGMSMTSDKLRSLVKKWQSTIEAHMDVKTTDGYLLRVFVIGFTKRAQGQVKKTSYAQSAQIRQIRKKMFDIISREATTVDLKDLVKKFVAETIGLAIQKACVNIYPLQNVLVRKVKILKQPKLDVGKLLELHAGETTTGGSAKVGSDFVEPEVLESV
PF01015	Cang_FungiBla	MAVGKNKRLSKGKKGLKKKIVDPFSRKEWYDIKAPTIFTQRNVGKTLVNRTQGLKNASDALKGRVFDISLADLNTGADEEAFRKIQLRCDEVAGKNLLTNFHGMSMTSDKLRSMVKKWQSTIEAHMDVKTTDGYLLRVFVIGFTARAQNQVKKTSYAQTAQIRQIRKKMFDIIAREATTVELKDLVKKFVAEAIGRSIKKACVNIYPLREVYVRKVKILKAPKLDLGKLLELHAGETTTDAAGAKVGSDFKEPEVLDSV
PF01015	Adig_Metazoa	IVDPFAKKDWYDVKAPSMFNIRQIGKTMVNRSTGTRNAVDGLKGRVFEVSLADLQNDEVAFRKFKLIVEEVQAKNCLTNFHGMDMTTDKLRSLVKKWQTLIEASVDTKTTDGYLLRLFCIGFTKKRTNQVKKTAYAKHSQVKAIRKKMVDIMSRDVSSADLKEVVNKLIPDSFGRDIEKACQSIYPLHDVFIRKVKVLKKPKFDVSKLMELHGEGTTHTATDETGAKIERDSFEPPVQDSV
PF01015	Nvec_Metazoa	MAVGKNKRLTKGKKGVKKKIVDPFTKKDWYDVKAPSMFNIRQIGKTVVTRTAGTKIASDGLKGRVFEVSLADLQNDEIAFRKFKLMCEEVQGRNCLTNFHGMNMTTDKLRSLVKKWQTLIEAAVDVKTTDGYLLRMFCIGFTKRRQNQIKKTAYAKHTQIKAIRKKMVDIITREVSTNDLKEVVNKLIPDSIGKDIEKSCQSIYPLHDVHIRKVKVLKKPKFDIGKLMEMHGEASSHATTTTTDETGTKIDREGFEPPIQDTV
PF01015	Bflo_Metazoa	MAVGKNKRLTKGGKKGAKKKIVDPFTKKDWYDVKAPAMFNIRQIGKTLVTKTTGTKIASEGLKNRVFEVSLADLQNDEVAFRKFKLIVEEVQGRNCLTNFHGMNLTTDKLRSMVKKWQTLIEANVDVRTTDGYLLRLFCIGFTKKRQNQIKKTAYAQHTQIRAIRKKMVEIMTREVSSNDLKEVVNKLIPDSVGKDIEKACQGIYPLHDVYIRKVKVLKKPKFDVGKLMELHGEGSGAVSKPVATTETGEKVDRPEGYEPPIQEAV
PF01015	Xtro_Metazoa	MAVGKNKRLTKGGKKGAKKKIVDPFSKKDWYDVKAPAMFNIRNLGKTLVTRTQGTKIASDGLKGRVFEVSLADLQNDEVAFRKFKLITEDVQGKNCLTNFHGMDLTRDKMCSMVKKWQTMIEAHVDVKTTDGYLLRLFCVGFTKKRNNQIRKTSYAQHQQVRQIRKKMMEIMTREVQTNDLKEVVNKLIPDSIGKDIEKACQSIYPLHDVYVRKVKMLKKPKFELGKLMELHGEGGGAGKPAGDETGAKVERADGYEPPVQESV
PF01015	Skow_Metazoa	MAVGKNKRLTKGGKKGAKKKVVDPFSKKDWYDVKAPSMFNIRNIGKTLVTRTQGTRIASDGLKGRVFEVSLADLQNDEVAFRKFRLMVEEVQGKNCLTNFHGMNLTRDKLCSMVKKWQTLIEANIDVKTSDGYLLRLFCIGFTKRRQNQIKKTTYAYHTQVKSIRRKMVEIMVRECQNVELKEIVNKLIPDSIGKDIEKACQGIFPLHDVHIRKVKVLKKPKLDVGKLLELHGEGSASKGGGGETTDESGEKVSRPDNYEPPVLDAV
PF01015	Tadh_Metazoa	MAVGKNKRLTKGKKGQKKKIIDPFTKKDWYDVKAPSQFAVRNIGKTLVNRTSGTKIASDGLKGRVFEVSLADLQNGEIAFRKFRLIAEEVLGKSVLTNFHGMSMTSDKLKSLVKKWQTLIEAHIDAKTTDGYLLRFFAIGFTKKRPNQIKKTAYAKTSQCRSIRKKMTDIITREVSAIDLKEVVNRLIPDSIGKDIEKSCQSIYPLHDVYIRKVKVLKKPKLDTAKLLELHGEGVASSGDAGSAVRRDGYEPPVQESV
PF01015	Ctel_Metazoa	MAVGKNKRVVKGGKKGGKKKVVDPFTKKDWYDVKAPSMFNIRQVGKTVVNRTVGTKLAADGLKGRVFEVSMADLQDDEVAFRKFRLIAEEVQGRNVLTNFHGMSLTTDKLRSMVKKWQTLIEGNVAVKTTDGYMLRLFCIGFTNRRQNQIRKTSYANSHQVRLIRKKMTDIMVREVSSSSLKEVVNKLLPDSIGKDIEKACQGIYPLHDVYVRKVKILKKPKLDLGKLLEMYGDGPSKATGATGESGEKVDRTVADGYEPAVQASV
PF01015	Aque_Metazoa	MAVGKNKRLTKGKKGAKKKIIDPYTKKEWYDVKAPTLFTNRNIGKTLVTRTQGKKLASDGLKGRVFEVSLADLQNDEVAFRKFRLIAEDISGKNVLTNFHGMTLTTDKLKSLVKKWQTLIEAIVDAKTTDGYLLRVFCIGFTRKQPNQIKKTAYAKASQCREIRKRMVEMMKAEISGVDLKEVVTKLIPDSIGRDIEKKCQAIFPLHDVLIRKVKVLKKPKFDIGKLRDLHGEGGTVVTTSSGTKVERSYEPPVQETV
PF01015	Ocar_Metazoa	MAVGKNKRLTKGKKGSKKKIVDPFSKKDWYDVKAPSMFNQRNVGKTLVTRTQGTKIASDGLKGRVFEVAQADLQNDDVPFRKFRLIVEDVQGRFCLTNFHGMLFTTDKVKSLVKKWQTLIETHVDVRTTDGYVLRIFVIGFTRKRPNQVKKTCYAQSSQCRQIRKRMNEIVQREISNSDIREIVNKLIPDSIGKDIEKSCHSIHPLHDVFVRKVKVLRKPKFELGRLMMIHGEGASSGSAPTSGEAASGEAGAKVERPEGYEPPVMESV
PF01015	Dpul_Metazoa	MAVGKNKGLSKGGKKGLKKKIIDPFTRKDWYDIKAPSMFAVRQVGKTLVNRTQGTRIASEGLKGRVFEVSLTDLQNESDSERAFRKFKLISEDVQGRNLLTNFHGMDMTTDKLRSMVKKWQSLIEASVEVKTSDGYLLRVFCIGFTKKEAESTRKTCYAQHAQIKSIRKKMVDIITREVGSVDLKEVVSKLIPDSISKDIEKSCQGIYPLHDVNIRKVKVLKKPKFDIGKLLELHGDGGKSGVGGEGGVSGSVDRPEGYEPPVQESV
PF01015	Hmag_Metazoa	MAVGKNKRLSKGRKGSKKKIVDPFSKKDWYDVKAPSNFNVRTIGKTVVSRTVGTKIASDGLKGRVFELAQADLNNDEVSFRKFKLVAEDVQGRNVITNFHGMSMTTDKLRSLMKKWRTCIEGHVDVKTTDGYLLRFFAIGFTKKRNNSIKKTCYAKSSLVKAIRKKMVDIITREVAEKDLKDVVNKLLPDSMGADIEKSCQNIYPLQDCHIRKVKCLKKPKFDLHKLMEMHESSGTATTTTGTAGGVVIDRPDNFEPPVLDSV
PF01015	Mlei_Metazoa	MAIGKNKRLSKRKGNKKKIVDPFTKKEWYDVKAPSMFSVRDVGKTLVTRTTGMKIASDALKGRVYECALADLNDDENAFRKFKLICEDVQGKYCYTNFHGMDLTRDKLCSLVRKWQTLIEAHVDVKTTDGYLLRVFCLGFTKRVSKQIKKAAYAKSSQVRAIRKKMVDTMTKEASTEDLKSFVNKLIPDSIGKDIEKECMDIYPLHDVHIRKVKVLKKPKFDASKLMDLHGEMGGTTDESGEIISAPGEFVEPTIQDSV
PF01015	Nk52_Ichthyosporea	DVFTKKEWYDVKAPSMFNIRQVGKTCVNRTAGTKIAADGLKGRVFECSLADLNKDEDQAFRKIRLHADEVQGKNVLTNFHGMTFTTDKLRSLVKKWQSLIEAFVDVTTTDGYKLRIFVIGFTKRRANQVSKCTYAQTAQIRQIRKKMFDIVTREASTVDLKDLVAKFVPGVIGKEIEKAVHGIYPLQNVFVRKCKIMRKPKFEIGKLLELHGDSASTEAGSKVKRSGDFKEPEVLESV
PF01015	Dcos_ChoanoflagellataStephanoecidae	DIFTKKEWYNVKAPTYFQERNIGYAVVSRSQGQKIAADGLKGRVFDIVLDDLQKDESTHRKIKLVAEDVQGRNLLTNFHGMDFTTDKLRSLVKRWQSLIEAFVDVKTTDGYVLRVFVIGFTKKTKLQIRKTSYAQTSQKKVIRSKMIEIVESYAKGCDLKELVQKFLPEAISKEIEKACQPIYPLHDVYIRKVKVLKKPKFDVSRLLEIH
PF01015	Hnan_ChoanoflagellataAcanthoecidae	DIFSKKDWYDVKAPAYFQKRLVARSPVNRTAGLKIASDGLKGRVFEVSLADLNQDESSHRKIKLFAEDVQGKSLLTNFHGMDLTTDKLRSLIKKWNTLIEAFVDVKTTDGYLLRVFVIGFTKKQRTQIRKTSYAQRSQCRDIRAKMIEIVEREIVTCDLREAVNKFIPESISKEIEKAAAGIYPLQDVFVRKVKIMKKPKFDVSRLLEIH
PF01015	Mbre_ChoanoflagellataCraspedida	MAVGKNKKLMKGKKGGKKKVVDVFTKKEWYDVKAPSYFKKRQVGKTPVNRTAGTKLSADGLRGRVYEMSLADLNDDESTFRKVKLQVEEIQGTECLTNFHGMSLTTDKLRSLVKKWRSLIEAFVDVKTNDGYVLRIFSIGFTKKQANSDRKTCYAQSAQKRALRAKMVEIMQREATCDLKEFVSKLMPGTIGQEIQKKCQSIFPLQDVYIRKVKVLKKPRFDVSKLLELHGEAGGVTADKGKTVAKSGEFVEPKPQTSV
PF01015	Lgig_Metazoa	MAVGKDKRVQKGSRKKGGKKKAADPFSKKEWYDVKAPSMFAVRKIGVTPVTRSSGTKLAADSLKGRMFKVSLADLQNDEVTFRKFRLLAEDVQGKNLLTTFQGMELTRDKLCSVVKKWQTMIDSRVDVKTTDGYHLRVFCIGFTKKRPNQVKKTCYAQRQHVFKIRKKMEDIMRKEITAIDMREVINKLIPDSIGKDIEKACQGIFPIHEVYIRKVKILKKPKLDFAKLLEMHGESNAPATVAAPVVEESGEKVERPDGYEPPVADAV
PF01015	Mber_Apusozoa	IDAFAKKEWYHVKAPALFRKRNVGQTLVNKTQGTTLASDTLKGRVFEVSLGDLNQDEDQAHRKIKLIAEDVQGRNILCNFHGMSFTTDKLCSLVRKWHTLIEANVDVKTTDGYSLRLFAIGFTKRRPNQNRKTSYAQSSQVRAIRAKMVDIMSTQVSGGSFKDFVQNLIPEKIKKDIERACQGIYPLHNVYLR
PF01015	Ttra_Apusozoa	MAIGKNKRLSKGGKKKGGRRAVDQFAKKEWYDIKAPSMFAKRQVGKTLVNKTAGLKIASEALKGRVFEINLGDLQDDEEQNFRKIKLICEDVQGRNILTNFHGMSFTTDKLRSLTRKWHTLIEASVDARTTDGYLIRLFAIGLTARHQKQTRKTSYAQTSQIRVIRAKMHEIMRRETENVDLKGFVTKLIPKVMKKEIETAARSIYPLQNVFIRKVKILKKPRFDVAKLLELH
PF01015	Crev_FungiZyg	IIDPFSRKEWYEIRAPTVFETRIVGKTLVNRSQGTKNAVDYLKNRVVEVSLGDLNKDEEQAFRKFKLRVDEVAGRNCLTSFHSMSITTDKLRSLIKKWQTMIEAHVDVKTTDGYILRLFAVAFTKRHIGQTKSTTYAQSSQVRAIRKKMMDIMTNEVTSSTMREVIQKFIPESIGREIEKACHVIYPIQNVLIKKCKVVKFPKLDAQKLLESHGSLEDTGSKVVKTDFKEPEIQAEV
PF01015	Sros_ChoanoflagellataCraspedida	MAIGKNKRLTKGKKGSKKKVVDVFTKKEWYDVKAPAYFNNRQLGKTLVTRSVGTKLAADGLRGRVFEVALGDLNGDDNTFRKVRFVCEDVYERDLLLNFHGMDLTADKKRSLVKKWQTMIQAFVDVKTTDGYVLRVFCIGFTKRQKHSTKKTAYAQTSQIKAIRQKMRDVVQNEASTCDLKQLVGRLITEEMGREIEKAVKSIYPLHNVFLKKVKVLKKPRADTAKLYELHGILSSKKKAGKKAAKAKAKTGFVEP
PF01015	Awhi_IchthyosporeaIchthyophonida	MVAGRNKKLGKKGRGKKTVDPFLHKEWFDIKAPTIFESRTVGKTLVTKSQGKRLASDDLKGRVFEVCLADLQNNDEDQAFRKIRMICEDVQGSNCLLNFHGMNFTTDKLRSMVKKWQTLIEAHVDVKTTDGYYLRLFCIGFTKKANGQRRRTAYAQSAQVRKIRKVMMERMAKEASAGDFKGLCKKFMAGAIGQDITKACNGIYPLKDVYVRKVKVLKKPKFDYARLMENHGESSGTASAAGGKVARSGDFVEP
PF01015	Pgem_IchthyosporeaIchthyophonida	MVQGKNKKLGKKGKGKKTDPFIHKEWYDVKAPSIFSKRNIGKTLVTKSAGKRLASDDLKGRVYEVCLADLQNNEDQAFRKIRMICEDVQGTDCLLNFHGMTFTTDKLRSMVKKWQTLIEGHVDVKTTDNYYLRMFCIGFTKKQKEQQRKTSYAQSAQIRAIRKVMMEKMAKEASSTDFKGLCTKLINGDIGGDIIKETNGIYPLKDVFIRKVKVLKKPKYDHARLMEMHGGAKNTSGKGGKVARTGDFNEPMPSDSI
PF01015	Stet_Breviatea	IDPFSRKDWYEVKAPALFANRMIGYTPVNKTAGLKLSSDSLKGRVFEISLGDLNKDKDEAQPFRKFKLRVDAVREEDVLTNFHGMNFTTDKLRSIVRKWQTLIEGSVDVKTSDGYKVRMFCIAFTNKGHQQVKKTSYATAAQVRAIRKRMVEIMTSEVQSVELNDLVKKLCLESIGKSIERACFRIYPLQNVYIRKVKLL
PF01015	Ddis_Amoebozoa	KGSKKGGKKVDPFTRKEWYVVRAPTQFFKSPADNKVGFTPVNRTQGTKLASDGLKGRVYEVSLADMKDDESQVFRKIKLRAEEVEGRNVLTNFYGMDLTSDKLRSLIHKWSTLIECFVDVKTTDGYFLRVFAICFTKKGESQKKKTSYAKTSRVKAIRKKMVDILTETVSSNDLKTVVDYLIGVSLNGVTTNASGFAPTLAEKIRIEGSSIFPIHNVFIRKVKVLKTPKVDAAKLSELYASSATSTIAPTEEVGTAVERTE
PF01015	Ppal_Amoebozoa	VDPFTRKEWYSVKAPTAYFARNQMNTVGYTPVNRTQGTKLASDGLKGRVFEVCLADMKQDESHVFRKIKLRADDVEGKNVLTNFYGMDVTSDKLRSLVHKWATLIECFVDVKTTDGYTLRVFAITFTKKAQKQLKKTSYAKSSKVKLIRKKMFDIINSNVTSSDIGGVVNKFIDQTISAQIQKECSYIFPLTNTYIRKVKVMKSPKFEIAKLLELY
PF01015	Mvib_Filasterea	MAVGKQKRVSKGKKGQKKAVDPFVRKEWYEVKAPTVFKNRTVCKTPVTRTTGTKIASEGLKGRVFEACLADLSTNEEDCXRKXXLXXXXVQGKXXLXNFHGXDMTXDKLRSXVRKWQXXIEXXVDVKTTDGYXLRXFXXXFTKKXXXQVXKXXYAXXXQXXQIRXKMXEIXXXXAXXXDLKXLXXKXXPEVXGXEIEKXCXNIYPXXXVFIRKVKIXKXPKFDXGKLLELHSGADNETGAKVERKDFKEPEVLAEV
PF01092	Acas_Amoebozoa	MQLNIANPATGCQKLIEIEDERKVRAFYDKRISDEVSAESLGDEWKGYVLKITGGNDEQGFPMMQGVLTAGRVRLLLDDRTCYRPRRAGERRRKSVRGCIVAGDLSVLNLVIVKQGEADVPGLTDKELPQRLGPKRASKIRKLFNLEKDDDVRKF
PF01092	Ctel_Metazoa	MKLNISYPATGCQKLIEVDDERKLRHFYEKRISAEVNADHLGDEWKGYVLRISGGNDKQGFPMKQGVLTVGRVRLLLSAGHSCYRPRRSGERKRKSVRGCIVDANLSVLSLVIVKKGEQEIPGLTDSSVPRRLGPKRASKIRKLFNLAKDDDVRQYVVRRPLPAKEGQKKPKSKAPKIQRLVTPLVLQRKRHRMAIKRQRSTRKREEAAEYAKLLAQRMKEAKDRKMERRKSSHSKSSRSESTSVAPAATV
PF01092	Dpul_Metazoa	MKLNISYPATGAQKLIDIEDERKVRIFYEKRMGAEVEADGLGDEWKGYVFRVAGGNDKQGFPMKQGILTTGRVRLLFSKGHSCFRERRTGERRRKSVRGCIVDANLSVLAVVVVKKGEQEIPGLTDVTVPKRLGPKRASKIRKLFNLAKEDDVRQYVIKRPLPKKEGKKQRFRSPKIQRLVTPVVLQRKRHRMALKKKRVVNRREQAAEYARLLALRTKEAKVKRAEEVKRRRSRSASKSS
PF01092	Adig_Metazoa	LRPFYDKRMAAECSAESLGDEWKGYLVRISGGNDKQGFPMKQGVMTNGRVRLLLSKGHSCYRPRRSGERRRKSVRGCIVDSQLSVLNLVIVKKGENEIPGLTDKTIPRCLGPKRAGKIRKMFNLSKEDDVRQYVISKQLPAKDDMPAKTKTPKIQRLVTPARLRRKRKLMAFKKTRAKKAKEEKAEYIKLLAKRAKEAKEKRKEVI
PF01092	Nvec_Metazoa	MKLNISYPVTGCQKLIEIEDERKVRSFYDKRMAMEVSGECLGDEWKGYVFRITGGNDKQGFPMKQGIMTNGRVRLLLSKGHSCYRPRRTGERKRKSVRGCIVDSQLSVLSLVIVKKGEQDIPGLTDNTIPRRLGPKRVGKIRKMFNLSKEDDVRQYVIRRPLPEKEGKKAKSKAPKIQRLVTPVVLQRKRKRLALKRQRAQKCKQEAADYAKLLAKRAKEAKEKRHEQLMKKRRASSLRDSVS
PF01092	Xtro_Metazoa	MKLNISFPATGCQKLIEVEDERKLRTFYEKRMATEVAADPLGDEWKGYVVRISGGNDKQGFPMKQGVLTHGRVRLLLSKGHSCYRPRRTGERKRKSVRGCIVDANLSVLNLVIVRKGEKDIPGLTDNTVPRRLGPKRASRIRKLFNLSKEDDVRQYVVRKPLAKEGKKPRTKAPKIQRLVTPRVLQHKRRRIALKKQRTQKNKEEASEYAKLLAKRTKEAKEKRQEQIAKRRRLSSLRASTSKSESSQK
PF01092	Sdes_IchthyosporeaDermocystida	MKLNISCPFTGGQKTFDIEDERKVRVLYDKRISQEVEGDSFGDEFKGYVFRISGGNDKQGFSMKQGVLTNGRVRLLLAAGQSCYRPRRAGERKRKSVRGCIVDSQMSVVALVVVKKGENEIPGVTDVSIPRRLGPKRASKIRKLFNLSKEDDVRKYVIRRTLPEKDGKKPQTKAPKIQRLVTPVVLQRKRHRLALKKQRAQKNKDEAADYAKLLAKRLKEAKEKRMEAM
PF01092	Nk52_Ichthyosporea	MKLNISCPATGGQKTFEIEDELKVRCLYDKRMTQEVEGDAIGEEYKGYVFKITGGNDKQGFSMKQGVLTNGRVRLLLSKGHTCYRPRRTGERKRKSVRGCIVDSQMSVVSLSVVKKGDKDIPGVTDVNVPRRLGPKRASKIRKLFNLSKEDDVRKYVIRRTIEKEGKKPTTKAPKIQRLVTPVVLQRKRHRLALKKERVVKNKADAADYAKLLAKRLKEAKEKKQE
PF01092	Tadh_Metazoa	MKLNIAFPATGCQKLIDIEDEHKYREFYEKRISAEVSAECLGEEWKGYILRITGGNDKQGFPMKQGVLTNGRVRLLLSKGHSCYRPRRTGERKRKSVRGCIVDSNLSVLNMVVIKKGDNEIPGLTDRTLPRRLGPKRCNKIRKLFNLNKQDDVRRYVIRRELPDKEGKKRTAKAPKIQRLVTPVRLQRKRKSMALKRQRSQKNKEEAAEYQKLLAKRLKEKRAEHLSRKRRASSSRNSASKA
PF01092	Ocar_Metazoa	MKLNISYPATGCQKLFEIDDEHKVRPFYDKRIAAEIGGDCLGDEWKGYVFRITGGNDKEGFPMKQGILTTGRVRLLLRKGHSCYRPRRQGERKRKSVHGCIVDANLSVLNLAIVKKGEGDIPGLTDETKPRRLGPKRASKIRKLFNLSKEDDVRQYVVRRPLPEQEGKKPRSKAPKIQRLVTPRVLQHKRHKKALIKRWTQKARDDAASYQRLLSQRAKE
PF01092	Bflo_Metazoa	MKINISYPATGCQKLIEVDDERKLRPFYEKRMSHQMTAESLGDEWKGYLVRISGGNDKQGFPMKQGVLTNGRVRLLLGKGHSCYRPRRTGERKRKSVRGCIVDSNLSVLNLVILKKGEQDIPGLTDTTIPRRLGPKRAGRIRKLFNLNKEDDVRQYVVRRPLPQKEGKKQKFKTPKIQRLITPQRLQRKRHMRAVKRRRYAKQREEEATYAKLLAKRKKEEREAHAKRRSSARESSLRESKSKA
PF01092	Skow_Metazoa	LKVNVSFPATGCQKMIEVDDERKLRPFYEKRMSQEVSAEPLGDEWKGYLVRISGGNDKQGFPMKQGVLTNGRVRLLLSKGHSCFRPRRTGERRRKSVRGCIVDSNLSVLNLVILKKGDADIPGLTDTTIPRRLGPKRASKIKKLFNLDKKDDVRQYVVKRPLPEKEGRKPKTKAPKIQRLITPVVLQRKRHRLALKKRRAIKGKEDAAEYAKLLAQRAKEKREAVLKRKRSASMRESIRESTSKSKSKSK
PF01092	Mvib_Filasterea	MKLNISYPATGCQKTIEIEDEKKVRPFYEKRISQEVSGDCLGDDFKGYVFRISGGNDKQGFPMVQGVLTNGRVRLLLKKGSKAYRPRRTGERKRKSVRGCIVDSNLSVISLVVVKKGEQDIPGVTDKQVPRRLGPKRANNIRKLFNLTKKDDVRKYVVRRTIEKEGKKPSTKAPKIQRLVTPVVLQRKRKLMQDKRDRAEKNKRQAADYSKLLAKRQKEQRDKRQDAL
PF01092	Colp12	MKLNISYPATGAQKTFDIENERKLRVFYEKRISAEVPGDSVGDEFKGYVFRISGGNDKQGFCMTQGILTNGRVRLLLKKGSKGYKPRRTGERRRKSVRGCIVDSNLSVLNLVVVKKGEAEIPGLTDKNVPRRLGPKRASKIRKLFNLSKEDDVRKYVIKRAIEKEGKKTTYKAPKIQRLVTPITLQRKRHRLALKKKSAEKAKADATEYAHLLAKIAKENQAKRQ
PF01092	Pbif_Breviatea	MKLNIANPSTGLQKLIEVDDERKLIPFMEKRISAEVPGDSLGDEFKGYLFKITGGNDKQGFPMMQGVLTNKRVRLLLNKDHKCYRPRRTGERKRKSVRGCITGSDLAVMSLIILKKGEQELPGLTDGSVPRKLGPKRASKIRKLFNLSKEDDVRKYVIRRELPAKGDKKPKSKAPKIQRLVTPVVLQRKRHRLALKRQRVAKSKAEKEAYEKLLSKKRAEAK
PF01092	Mcir_FungiZyg	LNIANPATGCQKLIEIEDERRLRGFYDKRMAQEVSGDSLGDEFKGYVFRISGGNDKQGFPMKQGVLLPHRVRLLLSKGHSCYRPRRTGERKRKSVRGCIVGSDLSVLSLVVVKQGEQDIPGLTDTTVPKRLGPKRASKIRKFFNLTKEDDVRKYVIRREVQPKAEGKKAYTKAPKIQRLVTPLTLQRKRHRQALKRRRAEASREAESEYKQLLAKRVKESKQEKIERRRTSS
PF01092	Rory_FungiZyg	MKLNIANPATGCQKLIEIEDERRLRGFYDKRMAQEVSGDTLGDEFKGYVFRITGGNDKQGFPMKQGVLLPHRVRLLMSKGHSCYRPRRTGERKRKSVRGCIVGSDLSVLSLVVVKQGEQDIPGLTDTTVPKRLGPKRASKIRRFFNLSKEDDVRKYVIRREVQPKTEGKKAYTKAPKIQRLVTPRTLQHKRRRQAIKRRRAESSREAEAEYKQLLAKRVKEAKDKKIERRRTSSMQKSAS
PF01092	Mver_FungiZyg	MKLNIANPATGCQKTIDFDDERKTRIFYDKRISAEVAVDTLGDEFKGYVFRITGGNDKQGFPMKQGVLLPSRVRLLLSKGHSCYRPRRTGERKRKSVRGCIVGSDMSVLSVTIVKQGEQDLPGLTDTTVPKRLGPKRANNIRKFFNLTKDDDVRKFVIRREVQPKNAEKKPYTKAPKIQRLVTPVVLQRKRHILALKKRRAENAKEAEAEYKSLLAKRVKEAAEKRSE
PF01092	Rirr_FungiZyg	MKLNIANPATGCQKLIEFDDERQLRIFYDKRISAEVQGDSIGDEYKGYIFRVSGGNDKQGFPMKQGVLRNDRVRLLLAKGHSCYRPRRTGERKRKSVRGCIVGNDLAVLSVVIVKQGEQPIPGLTDNPVPKRLGPKRASKIRKFFNLTKEDDVRKFVIRREITPKNNKKPYTKAPKIQRLVTPLTLQRKRHRIALKRRRAKAAKVAKEEYDTLLAKRNKEQKERKAD
PF01092	Ccor_FungiZyg	MKLNIANPATGCQKLIEIDDERRVRVFYDKRISAEVPGDSIGDEFKGYVFRVTGGNDKQGFPMKQGVLLPNRTRLLLSKGHSCYRPRKTGERKRKSVRGCIVGSDLAVLSLVVVKQGEQEIAGLTDTVVPKRLGPKRANKIRKMFNLSKEDDVRKYVIRREVQPKDADKKPYTKAPKIQRLVTPQRLQRKRAEVAAKKTRAARSKAQAAEYKALLASRASERRAHKHE
PF01092	Crev_FungiZyg	MKLNIANLANGCQKSFSIDDEHRVRVFYDRQISDEVPGDSVGDEFKGYVFRITGGNDKQGFPMKQGVLQPSRVRLLLSTGHSCYRPRRTGERRRKSVRGCIVGPDLSVLSLVIIKQGEADIPGLTDVSVPKRLGPKRANNIRKLFNLSKDDDVRKFVIRREVTPKNPEKKPYTKAPKIQRLVTPRTLMHKRRLVTLKKRQQEKSKEAAAEYAKLLAQRQK
PF01092	Spom_FungiDik	MKLNISYPANGTQKLIEIDDDRRLRVFMEKRMGQEVPGDSVGPEFAGYVFKITGGNDKQGFPMFQGVLLPHRVRLLLRAGHPCYRPRRDGERKRKSVRGCIVGQDLAVLALAIVKQGEQDIPGLTDVTVPKRLGPKRASKIRRFFNLSKEDDVRQFVIRREVVPKKEGKKPYTKAPKIQRLVTPRTLQHKRHRFALKRRQAEKNREEAAEFAQLMAKRVAEAKQKKEVVKARRASSMK
PF01092	Bden_FungiChy	IQINIAYPATGAQKMVEIDDERKLRIFYDKRMATEVSGDGLGDEFKGYIFKITGGNDKQGFPMKQGVLLPHRVRLLLSDGHSCYRSRRTGERKRKSVRGCIVGSDISALSLVVVKQGEQDIPGLTDVAIPKRLGPKRANNIRKMFNLTKEDDVRKYVIRRDVVSKKDATKIRSKAPKIQRLVTPLTLQRKRNLKAVKRRNAESSREAAANYTQLLALRIKEKKEKRHEIHVKRRLSSTRKSTSSAK
PF01092	Spun_FungiChy	MKLNIAYPALGTQKCIEVDDERKYRIFYDKRMSTEVKGDALGDEFKGYVFKITGGNDKQGFPMKQGVLEARRVRLLLSAGHSCYRPRRTGERKRKSVRGCIVGSDISALSLVVVKQGEADIPGLTDTQIPKRLGPKRASKIRKMFNLSKEDDVRKYVIRREIPGKGDKKGYTKAPKIQRLVTPRTLQRKRHLLALKRRQSEKVQEDAAEYAKILAQRIKERNQKRQELHLKRRLSSTRKSTAQA
PF01092	Rall_FungiCry	FQLNIANPTTGAQKSFVIDDERKIRIFYDKRMSQEVQADALGDEFKGYVLKIMGGNDKQGFPMKQGVLLPSRVRLLLSKGHSCYRPRRTGERKRKSVRGCIVGSLSLVVVKKGDQEIPGLTDVTVPRRLGPKRASKIRKLFNLTKEDDVRQYVIRREIEKNGKKFTKAPKIQRLVTPVRLQRKRALMADKKKRAEASREAAAEYAKLLAKRVKEQKER
PF01092	Pisp_FungiNeo	MKLNISYPATGAQKLIDIEDEHKIRVFYDKRMSAEVDGAAIGDEFKGYIFKITGGNDKQGFPMKQGLLTNHRVRLLLSKGHSCYRPRRVGERKRKSVRGCIVGNDIAVLSLAIVKQGEQEIEGLTDRSCPKRLGPKRASNIRKMFNLSKEDDVRQYVIRRELTGKNGKKYTKAPKIQRLVTPVTLQRKRHLLALKRKNAEASREAAEQYAKLLAQRIKERNAHKHEQL
PF01092	Gpro_FungiChy	MKLNIAYPATGAQKLVDIDDERKVRIFYDKRISAEVPGDSIGDEFKGYVFKITGGNDKQGFPMKQGVLVPHRVSLLFSKGHSCYRPRRTGERKRKSVRGCIVGPDLAVLSLTVVKQGDNDIEGLTDRNVPKRLGPKRASKIRKMFGLKKEDDVRKYVIRRELSPKGDKKRGSKAPKIQRLVTPLTLQRKRHLKSLKVKKAQASREQAADYAALVQRKVKEAREKKQE
PF01092	Amac_FungiBla	LNIADPSTGSQKTIEIEDEKKVHVLMDKRISAEVPGDQLGDEFKGYVFKITGGNDKQGFPMKQGVLVPSRVRLLLSKGHSCYRPRRTGERKRKSVRGCIVSSDISVVSLVVVKKGEADLPGITDVTVPKRLGPKRASKIRKMFNLTKEDDVRKYVIRREVPSKKEGKPAKSKAPKIQRLVTPLTLQRKRHYNAEKRRRAVASREAAADYKKLLASRQKEARDKKHALKLQRRSSAS
PF01092	Cang_FungiBla	LNIADPSTGSQKTFEIDDEKRYHVLIDKRISQEIPGDQLGDEFKGYIFKITGGNDKQGFPMKQGVLVNHRVRLLLSEGHSCYRPRRTGERKRKSIRGCIINHDISVVSLVVVKKGEADIAGVTDVTVPKRLGPKRASKIRKMFNLTKEDDVRKYVIRREVPKKSGKAESKAPKIQRLVTPLTLQRKRAHHAEKRNRAVAAREAAASYKKLLADRAHELYAKKH
PF01092	Nspp_Discicristoidea	MKLNLSYPATGCQKLVDIEDERKLHVLWDKRMSNEVPGDSFGDEYKGYIFKITGGNDKQGFPMKQGVLTSQRVRLLFSKGHSCYRPRRAGERKRKSIRGCIVSSDMSVVSLVVVKKGEQEIPGLTDTSKPLRLGPKRASKIRKLFNLSKEDDVRKYVIRREVPAKKEGRKAHTKAPKIQRLVTPRVLQHKRSLLAQKRRKAEANKEAATEYAHLLAQRTKEMRDKRH
PF01092	Aque_Metazoa	VRLNISYPVTGCQKLIEIDDTAKVRPFFEKRMAQEVEGDCLGDEWKGYVFRITGGNDRDGFPMKQGVLTNTRVKLLLSKGHSNFRARRKGHRKRKSVHGCIVDDSLSVICLAIVKKGEGEIPGLTDNTIPRRLGPKRVGKIRKLYNLSKEDDVRQYIIRRPLPQKEGKKQQYKAPKIQRLITPLKLQRKRHRASLRRRWGEKSKREAADYKRLLAQRVKEQRERQQMAKRRLSSKRSSTSST
PF01092	Apar_IchthyosporeaIchthyophonida	MKLNIANPSTGAQKCIELEDELKARIFYDKRISQEVEGDSLGDEYKGYVFRITGGNDKQGFPMVQGVLTNGRVRLLLAKGAKSYRPRRTGERKRKSVRGCIVDSNMSVINLVITKKGEQDLPGLTDVTVPRRLGPKRASKIRKLFNLTKEDDVRKYVIRRQLPDRENGKKRGSKAPKIQRLVTPVTLQRKRHRLALKKNAAKQAVVDKAEYAKLLAQRHHEAQLSRKDAL
PF01092	Ihof_IchthyosporeaIchthyophonida	MKLNIANPSTGAQKSILLEDELKARIFYDKRISQEVEGDSLGEEYKGYVFRITGGNDKQFAMVQGVLTNGRVRLLLTKGSKSYRPRRTGERKRKSVRGCIVDSNMSVINLVIVKKGEADLPGITDVTVPRRLGPKRASKIRRLFNLTKEDDVRKYVIRRELAPKADGKKRGSKAPKIQRLVTPVTLQRKRHRLALKKRASAQAVADKAEFTKLLAQRKFEALTARKEAL
PF01092	Ihou_IchthyosporeaIchthyophonida	RIFYDKRISQEVEGDSLGEEYKGYVFRITGGNDKQGFAMVQGVLTNGRVRLLLTKGSKSYRPRRTGERKRKSVRGCIVDSNMSVINLVIVKKGEADLPGITDVTVPRRLGPKRASKIRRLFNLTKEDDVRKYVIRRELAPKADGKKRGSKAPKIQRLVTPVTLQRKRHRLALKKRASAQAVADKAEFTKLLAQRKFEALTARKEAL
PF01092	Cfra_IchthyosporeaIchthyophonida	MKLNIAYPATGAQKLIELDDELKARVLYEKRISQEVDGDSFGDEFKGYVFRITGGNDKQGFPMMQGVLTNQRVRLLLGKEHPCFRERRKGCRKRKSVRGCIVDSNMTVVNLVLVKKGEADIPGLTDVVHPRRLGPKRASKIRKLFNLTKEDDVRKYVVRRELPEKDGKKQGSKAVKIQRLVTPRTVQRKRAIVNERKNKLIQSSKDVAEYKALMHTRHTEAIASRKEAHKKRRTSTSVA
PF01092	Sarc_IchthyosporeaIchthyophonida	LNIANPATGAQKLVELDDELKARVLYDKRISQEVEGDSFGDEFKGYVFRISGGNDKQGFPMMQGVLTNQRVRLLVGKGQPCFRERRKGCRKRKSIRGCIVDSNMTVVNLVVVKMGEGEIPGLTDVVHPRRLGPKRAQKIRKLFNLTKDDDVRKYVVRRELPEKNGKVQTKAPKIQRLVTPQTVQRKRHIVNSRKNKLQQSSKDVAEYKELVAKRHAEA
PF01092	Ppol_Amoebozoa	PPTGTCKSIDIDDEKKLRIFYEKRISQEVAGDALGDEFKGYVFKITGGNDKQGFPMMQGVLVQGRVRLLLGHSGYRPRRDGERKRKSVRGCIVGPDLSALDLVIVKKGDAELPGITDKYVPRR
PF01092	Cowc_Filasterea	VKLNISYPATGSQKSITIEDEKKLRPFYDKRISQEVEGDFLGDEFKGYVFRISGGNDKQGFAMVQGVLTNGRVRLLLKEGHKTYRPRRAGERKRKSVRGCIVDQNLSTLNLVIVKKGEQELAGITDVTQPRRLGPKRASRIRKLFNLSKDDDVRKYVIRRKIEKEGKKPTTKAPRIQRLVTSVTLQRKRHRAALQTARATKAAQQKQEYTTLIAQRQKAARDALINKRRGIKA
PF01092	Hmag_Metazoa	MKLNVSYPATGAQKLIEIEDEIKLRSFNDKRMAQECSAECLGEEWKNYIVRISGGNDKQGFPMKQGVMTNGRVRLLLSKGHSCYRSRRTGERKRKSVRGCIVDSNLSVLNLVIVKKGDNDIPGLTDRVVPKRLGPKRANKIRKLFNLAKEDDVRKYVVEREIKPKEGKPAPKVKKFKRAKIQRLVTPQRLQRKRHVMALKRSRAAHAKQEAATYATLLAKRHKEAKEKRHSEHMKRRRLSSLRESKS
PF01092	Mlei_Metazoa	MMQGVLSNTRVRLLFKKGMPNYRERRAGVRKRKSVRGCIVDSQLSVLDLVVMKKGENEIPGLTDTTQPRRLGPKRVGKIRKLFNLSKEDDVRQYVVHRPLPEKEGKKPRSKAPKIQRLVTPARIQRKRKVLALKKQRSEKNKVQAAEYAKLIAQRQREKRQ
PF01092	Dcos_ChoanoflagellataStephanoecidae	MKLNISFPSNGTQKTYEIKEEARLRPFYEKRMSAEVPADALGDDWKGYIVRISGGNDKQGFPMKQGVLTTKRVQLLMDKGHSCYRPRRTGERKRKSVRGCIVDANLAVLSLVIVKKGEKDIEGLTDVSNPRRLGPKRANKIRKLFALTKDDDVRKYVVRRKITREGKKDNEKAPKIQRLITPQSLQRKRREVAAKRNRASKQRDLKEQYQVLLAQ
PF01092	Mbre_ChoanoflagellataCraspedida	MKLNISYPPNGTQKTYDFENEAAVRPFYEKRISAEVPADSLGDDWKGYVLRISGGNDKQGFPMRQGVLTNRRVKLLMSEGHSGYRPRRSGERKKKSARGCIVDSNLSVIACIIVQKGEKEIEGLTDVTRPRRLGPKRANNIRKLFNLTKEDDVRKYVIRRKIEKDGKVVNTKAPKIQRLITPERLQRKRCELAQKRANRAHQNQLKAEYSEMLAKLQKERADARAALHQKRRISSRKSNKTPCQA
PF01092	Sros_ChoanoflagellataCraspedida	MKLNISYPANATQKTFDFEDESKIRPFYDKRIASEVPADSLGDEWKGYVLRITGGNDKQGFPMRQGILTNKRVRLLLGKGSPNFRERRKGARKKKSIRGCIVDANLSVLSCVVVKTGEKDIEGLTDTTRPRRLGPKRANNIRKLFNLSKEDDVRKFAVRRVVKREGKKNIVKKPKIQRLVTPRRLARKKAELAAKRAQREKQRALADEYAQRLAALQKERSEARDARRASSRKSRASER
PF01092	Clim_Corallochytrea	MKFNIAYPANGTQKLIDIDDERRCRAVYDKRMGQEMEADFLGEEFKGYILRVSGGNDKQGFCMKQGVLTNQRVRLFMGAGHSCYRPRRKGERRRKSVRGCIVDQLMSVVNLVVVKKGEQEVPGLTDRNIPRRRGPKRANNIRKLFNLSKEDDVRKYVIRRNLDDKDGKKRGSKSAKIQRIITPQRLQRKRRARALKEKRREASREQAADYKALLATRAREARERRRSLSRRRSAS
PF01092	Clii_Corallochytrea	MKFNIAYPANGTQKLIDIDDERRCRAVYDKRMGQEMEGDFLGEEFKGYILRVSGGNDKQGFCMKQGVLTNQRVRLFMGAGHSCYRPRRKGERRRKSVRGCIVDQLMSVVNFVVVKKGEQEVPGLTDRNIPRRRGPKRANNIRKLFNLSKEDDVRKYVIRRNLDDKDGKKRGSKSAKIQRIITPQRLQRKRRARALKEKRREASREQAADYKALLA
PF01092	Umay_FungiDik	MKLNVANPATGAQKSFDIQDERLVRCFYEKRMSQDVEVDSLGEEWKGYVLRIGGGNDKQGFPMKQGVLLPNRVRLLLSKGDSCYRPRRTGERKRKSVRGCIVGPDIQALHLIVVKQGEKEIPGLTDAESTVPKRLGPKRANHIRKFFNLSKEDDVRQFVVRREVVSKKEGAKPYTKAPKIQRLVTAQRLQRKRHLRSLKIRKAEAQKIQKEEYEQVLAKRVAEKKQEVAAHKAARKSAKKVQA
PF01092	Ddis_Amoebozoa	MKLNIAYPVNGSQKKINIEDKNKVRCFMEKRIGQEVEATTLGDEFKGYVFKITGGNDTEGFPMMQGVGAPTRVRLLLDGRSGCFKPSRDGERKRKSVRGCIVAEDIASLQLIIVKKGDAEIPGLTDVSFPASKGPKRASNIRKLFKLSKDEDVRSFVIRRELPATDKRKAKSKAPKIQRLVTPTTVARRKALRAKKAARHTKASNEAAEYAKLVAQRQQAKAKRSVKVSSKK
PF01092	Ppal_Amoebozoa	RFRCFIDKRMGQDVAVDTLGEEFKGYVFRITGGNDGEGFPMLQGVAVPHRVRLLLTKNSGCYIPKRDGERKRKSVRGCIVADDIASLQLIIVKKGDAELDGLTNVSFPSRKGPKRANNIRKLFKLSKEDDVRPYVIRREVPSKKEGRKPNSVAPKIQRLVTP
PF01092	Cneo_FungiDik	MKVNFSNPATGAQKLIDFEDERKTRVFMEKRMGQEVAIDSLGEEFAGYVVRITGGNDKQGFPMKQGVLLQHRTRLLLSDGHSCYRARRDGERKRKSVRGCIVGSDIGVLAVAIVKQGANELPGLTDVVLPKRLGPKRATKIRKFFNLSKEDDVTKFVVRREVTKKNGKTTTKAPKIQRLVTPLRLQRKRHLRSLKKRRTEAQKETVAEYNAAVAKHAEERKVHNAAVKAAKKARRSA
PF01092	Falb_Discicristoidea	MKFNIADPQTGGQKLLDIEDERKIAPFLDKRMSQEVAGDSLGEEFKGYVFKITGGNDKQGFPMMQGIMSHGRVRLLFSKGMSCYRPRRTGERKRKSVRGCITGSDLSVMNLVVVRRGAETVPGLNDVTKPVRLGPKRASKIRKLFNLSKEDNVCDYVVRRDIMKGDKKVGSKAPAIQRLVTPQRLQRKRALLAERKERKASHREAAAEYQAILAQRIKEQREKR
PF01092	Ttra_Apusozoa	INIANPATGAQKLLDVEDDLKVRHFMDKRISAEVAADPLGEEFAGYVFKITGGNDKQGFPMKQGVLLPHRTRILLSKGDSCYRSKRSGERKRKSVRGCIVQQDLSVINVVIVKRGPADLPGLTDVSHPRRLGPKRVTKIRKLFDLDEDDDVRKFVVRRAIEKNGKTFYKSPKIQRLVTPRRLERKRRRLNEKKQIIAKKVAEAQAYADLLAERASKRKAERAAQLAKKK
PF01092	Hnan_ChoanoflagellataAcanthoecidae	MKYNISCPATGSQKTIDIDSDHAFKPFVDKRISHEVAGDTLGEGFKGYIFRITGGNDKQGFPMKQGVLTNTRVRLLLDKNKSCYRAGRKGERKRKSVRGCIVDSQMSVISLVIVKKGDTDIPGITDVSRPRRLGPKRASKIKQLFALEKGDNIVDYAKSFKRKIEPKEGKGEKHRFKYPKVQRLVTPRRLQRKRHMVACKRVRAEKQRDLKTGYATLLAQRAKEHNDEK
PF01092	Awhi_IchthyosporeaIchthyophonida	MKLNISHPANGVQKCFECHDDRKLAIFNEKRIAQEIPGEAIDDAWTGYIMRISGGNDKQGFPLLQGVLTNARIKLLMKKGSKCYRERRVGERKKKSVRGCILDVNQLAVINLVIVKEGESPIAELSDTKPRRLGPKRANNIRKMFNLDKEADVRKYVVRREVVKEGKSNRFKSPKIQRLITPVVLQRKRAKQAFKEDCRKRAVVAKAAYAELLHKRHAEARAVRSAHVAKKRRIS
PF01092	Pgem_IchthyosporeaIchthyophonida	MKLNISYPSNGTQKVFECHDDRKLAIFNEKRISQEIAGEAIDADWAGYSFRISGGNDKQGFPLLQGVLSNQRIKLLMSKGSKCYRVRRKGERKKKSVRGCILDVNQMAVINLVVTKEGEKPIDALAESKPRRRGPKRASNIRKMFNLDKSADVRQFVLKRTVEKDGKTRTKSAKIQRLVTPLTLQRKRAKKAFKVNRRAQAAVAKAAYDELMHTRHAEVRASRQAVLAKKRRQS
PF01092	Stet_Breviatea	TTYCVKVFDIIEERKLVPFYEQRIAAEVAIDFLGDEFKGYVVKITGGNDKQGFPMMQGVLCNHRIRLLLGEVHPCYRTWRPHRKGERHRKTVRGCIVGPDLSMLNCVISKRGPADIEGLTNGMVPNRRGPKRASKIRKFLGISKEDDVCHYVKMLQREVPSKKEGGKPTFKRPKIQRLITPQRLQRKRAYLASKAAKGKVAKEQRKEYMDMLAQRKKE
PF01125	Acas_Amoebozoa	MPKVRTSKKQPPEGWELIEPTLNELAQKMKDAENDPHEGKRKAESVWPIFRLHHQRSRYIFDMHYRKKKISRELYDWCLKEKYADAALIAKWKKAGYERLCCLRCIQTRDHNFGSTCICRVPADKLEEGKIVECLHCGCRGCAS
PF01125	Ppol_Amoebozoa	KTKPPKGYELIEPTLNKLAQDMREAENEPHEGKRKAEGVWPIFRLHHQRSRYIYELFYRKKEISRELYEWCLNEGIADKNLIAKWKKAGYEKVCCLICVQTRDHNFATTCVCRVPKAKLESGKIIECVHCGCKG
PF01125	Bden_FungiChy	MPKVRRGTKPPPEGWELIEPTLTELAQKMRQAESEPTEAKRKVETAWPIMRLHHQRTRYIYDIYYRRKAITRDLYDYCIKQGHADAALIAKWKKTGYEKLCCLRCIQPKDTNFGTTCICRVPKQQLDENKVIECVHCGCRGCA
PF01125	Spun_FungiChy	MPKIKRGRKPPPEGWDLVEPTLTELQQKMREAENEGHEGKRKSESLWPVFRLHHQRSRYIYDMFYRRKAISRELYDYCLKEGYADGALIAKWKKVGYEKLCCLRCIQPKDTNYGTMCICRVPKDKLSEERVIECLHCGCRGCA
PF01125	Gpro_FungiChy	MPKIKKARTKPPPDGWEEIEPTLTELNQKLREAENEPHEGKRKAESLWPIFRVHHQRSRYIYELYYKRHVISKELYDYCVNERYADATLIAKWRKPGFERLCCLQCIQTRDTNFGTTCVCRVPKDKLETGRVVECRHCGCRGCSG
PF01125	Adig_Metazoa	PKVRRSRKPPPDGWELIEPTLDELDQKMREAETEPHEGKRKTESLWPIYRIHHQKSRYVYDLFYRRKAISRELYEFCLKEGYADKNLIAKWKKQGYENLCCLRCIQCRDTNFGTNCICRVPKSKLEEGKIVECVICGCRGCSG
PF01125	Nvec_Metazoa	MPKVRRSRKPPPEGWELIEPTLDELDQKMREAETDPHEGKRKVEALWPIFRIHHQKSRYVYDLYYKRKAISKELYDFCLKEGHADKNLIAKWKKQGYENLCCLRCIQTHDTNFGANCICRVPKSKLEEGKIVECVVCGCRGCSG
PF01125	Bflo_Metazoa	MPKVRRSRKPPPEGWELIEPTLDELDQKMREAETEPHEGKRKVEALWPIFKIHHQKSRYIFDLFYRRKAISRELYEYCLKEGIADKNLIAKWKKQGYENLCCLRCIQTRDTNFGTNCICRVPKSKLEEGRIVECVHCGCRGCSG
PF01125	Skow_Metazoa	MPKVKRSRKPPPDGWELIEPTLDELDQKMREVETEPHEGKRKVEALWPIFKLHHQRSRYIFDLFYKRRAISRELYDYCIKEGYADKNLIAKWKKQGYENLCCLRCIQARDTNFGTNCICRVPKSKLEEGKVVECVHCGCRGCSG
PF01125	Xtro_Metazoa	MPKVKRSRKPPPDGWELIEPTLDELDQKMREAETEPHEGKRKVESLWPIFRIHHQKTRYIFDLFYKRKAISRELYDYCIREGYADKNLIAKWKKQGYENLCCLRCIQTRDTNFGTNCICRVPKTKLEVGRIIECTHCGCRGCSG
PF01125	Lgig_Metazoa	MPKIKRSRKPPPEGWELIEPTIDELDAKMREAETDPHEGKRKVEAMWPIFRLHHQKSRYIYDLFYRRKAISRELYEYCLKENIADKNLIAKWKKQGYENLCCLRCIQTRDTNFGTNCICRVPKPKLESGKIVECIHCGCRGCSG
PF01125	Hmag_Metazoa	MPKVKRSRKPPPDGWELIEPTLDELDAKMREVEQDPHEGKRKVEALWPIFRLHHQKSRYLYDLFYKRKAISRELYDYCVKENIADANLIAKWKKQGYENLCCLRCIQPRDTNFGTNCICRVPKPKLEEGRVVECIHCGCRGCSG
PF01125	Dpul_Metazoa	MPKVKRSKKPPPEGWELIEPTLEELEAKMREAETDPHEGKRKVEALWPIFKIHHQRSRYIFDLFYKRKAISRELYDYCLKEHIADSSLIAKWKKQGYENLCCLRCIQTRDTNFGTNCICRVPKAKMEEGKIVECVHCGCRGCSG
PF01125	Ctel_Metazoa	MPKVKRSRKPPPDGWELIEPTLDELDQKMREAETESHEGKRIVEALWPIFRIHHQRSRYIFDLFYKRKAISRELYDYCLKENIADKNLIAKWKKPGYENLCCLRCIQTRDTNFATNCVCRVPKTKLEEGKIVECVNCGCRGCSG
PF01125	Ocar_Metazoa	MPRVKRSKKPAPDGWDLIEETLDELDLKMREAETETHEGKRKVEALWPIFRLHHQRSRYIYDLFYKRKAISRELYEYCLDEGIADKNLIAKWKKQGYENLCCLRCIQTKDTNFGTNCICRVPKSKLEADKLVECVHCGCRGCSG
PF01125	Tadh_Metazoa	MGKIKRSKKPPPEGYELIEPTLEELDAKMREAEVDPHEGKRKVECLWPIFRVHHQRSRYIYDLYYKRKAISKELYEYCLKESIADKNLIAKWKKNGYENLCCLRCIQTRDTNFGTSCICRVPKSKLEEDRVIECVHCGCRGCSG
PF01125	Mlei_Metazoa	MPKVRRSRKPPPEGWELIEPTIEELDAKMREHETEPHEGKRKVEALWPIFKIHHQKSRYLYDLYYKRKAISKELYDYCIKEKIADANLIAKWKKDGYERLCCLRCIQVRDTNFGTNCICRVPRSKLDQIKIVECVHCGCRGCSG
PF01125	Aque_Metazoa	MPKVRRSRKKPPEGWEVIEPTLDELDQKLREAEIETHEGKRKSEALWPIFKIHHQKSRYIYELFYKRKAISRELYQFCLDENIADAALIAKWKKSGYENLCCLRCIQPRDTNFGTACICRVPKSKLETDKITECIHCGCRGCSG
PF01125	Awhi_IchthyosporeaIchthyophonida	MPKVRRSRRPAPPDGWELIEPTLSELENKLREAENEDHEGKRKVETVWPVFQLNHQRSRYIYELFYKRKAITRELYDYCISEKYADKNLIAKWKKQGYENLCCLRCIQTRDTNFGTQCICRVPKAKLDENKVVECIHCGCRGCS
PF01125	Pgem_IchthyosporeaIchthyophonida	MPKVRRGRKSTPPDGWELIEPTLMEIENKVREAENEEHEGKRKVEILWPVFQLHHQRSRYIYDLFYKRKAISRELYDYCLKEKYADQALIAKWKKQGYENLCCLRCIQSRDTNFGTQCICRVPKSKLEEGRVVECVHCGCRGCS
PF01125	Apar_IchthyosporeaIchthyophonida	MPKVRRGRKKPPPDGWELIEPTLLEIQQKMREAEAESHEGLRKVETQWPIFRLHHQRSRYIYELYYKRKAISKELYDYCINEKYADPALIAKWKKQGYESLCCLRCIQTRDTNFGTQCVCRVPKSKLEEGRIVECVHCGC
PF01125	Ihof_IchthyosporeaIchthyophonida	MPKVRRGRQKPPPEGWELIESTLMEIQQKMREAEADTHDGKRKVEAGWPIFRLHHQRSRYIYELYYKRKAISKELYDYCIKEKYADAALIAKWKKQGYEILCCLRCIQSRDTNFGTQCVCRVPKSKLEEGRIVECVHCGCRGCSG
PF01125	Ihou_IchthyosporeaIchthyophonida	AEADTHDGKRKVEAGWPIFRLHHQRSRYIYELYYKRKAISKELYDYCIKEKYADAALIAKWKKQGYEILCCLRCIQSRDTNFGTQCVCRVPKSKLEEGRIVECVHCGCRGCSG
PF01125	Colp12	MPKIRRGKNVAPPEGWELIEPTLTELEQKMRDAENEPHEGKRKVEALWPIFRIHHQRSRYIYELFYKRQAISRQLYEYCLENGFADKNLIAKWKKNGYENLCCLRCIQTRDTNFGTQCVCRVPKTKLEEGKIVECKIVECVHCGCRGCSG
PF01125	Sarc_IchthyosporeaIchthyophonida	MPKVKRSRRKPPPDGWDLIEPTLLEFEQRMREESHEGKRKSESTWPIFRVHHQRSKYVYDLFYKRKAISKDLYEYCLKEKYADANLIAKWKKSGYENLCCLRCIQTRDTNFGTQCICRVPKKKLEEEKVIECVHCGCRGCSG
PF01125	Pisp_FungiNeo	IRRSRTKRPPAGWELIEPTLKELERKMRDAENESHEGKRKTESLWPIFRIHNQRSRYIYDMFYKRKAISRELYNYCLKEGYGDAALIAKWKKPGFENLCCLRCIQKRDTNFGTTCICRVPKDKLEEDKIIECLHCGCRGCCG
PF01125	Ccor_FungiZyg	MPKIRTLRGKKPPAGFEEIEPNLNEFAKKLRDAENDPHEGKRKVEAVWPVFQITHARSRYIYDLYYKRKAISKEVYDYCLKQKYADGNLIAKWKKAGYEKLCCLRCIQPKDTNFGNACICRVPKKKLQEGKTIECILCGCKGCAS
PF01125	Rirr_FungiZyg	MPKIRHSRTKKPPEGFEDIEETLQEFARKMKDAENEPHEGKRRVESLWPIFRLHHQRSRYIYDLYYKREAISKDVYDYCLKHGYADGNLIAKWKKPGFERLCCLRCIQPKDTNFGTTCICRVPKSKLEEGRIVECVLCGCRGCSS
PF01125	Mcir_FungiZyg	MPKIRTTRTKRAPEGFDEIEPTLEEFARKMKEVENESHEGKRIVESTWPVFRIHHQRSRYIYDLYYKRKIISRDLYDYLLKNKYADGNLIAKWKKPGFEKLCCLRCIQPKDTNFGTTCICRVPKEKLEDGKMVECVHCG
PF01125	Rory_FungiZyg	MPKIRTQRTKRPPEGFDEIEPTLEEFARKMRDVENESHEGKRVVESSWPVFRIHHQRSRYIYDLYYKRRIISRDLYDYLIKNKYADANLIAKWKKPGFEKLCCLRCIQPKDTNFGTTCICRVPKEKLGEGKMVECVHCGCRGCA
PF01125	Mver_FungiZyg	MPKIRSSRTKRAPEGFDEIEPTLKEFQQKMKDAENDPHEGKRKVEALWPVFRIHHQRSRYVYELFYKRKAISKELYEYLLKQGYADGNLIAKWKKAGYEKVCCLRCIQPKDTNFGTTCVCRVPRDMLEEGKVIECIHCGCRGC
PF01125	Sdes_IchthyosporeaDermocystida	MPKVKRSRNRKKIPEGFEDVEGTLLEFEQKMREAETDPHEGKRKVEALWPIFRIHHQRSRYIYELYYKRKAISKELYEYLLDENYADKNLIAKWKKAGYENLCCLPCIQSKETNFGTLCICRVPKSKLDCDKIVECVHCGCRGCSG
PF01125	Nk52_Ichthyosporea	MPKIRRTKSKKKPPEGFDEIEGTLQEFESKMREAESQPHEGLRKNEALWPIYRLHHQRSRYVYELFYKRKAISRPLYDYLLREGYADGNLIAKWRKTGYENLCCLRCIQSRDTNYGTLCVCRVPASKREGDKKVVECVHCGCRGCSG
PF01125	Dcos_ChoanoflagellataStephanoecidae	MPKVRHSKRGPPEGWDLIEPTLDELDMKMREAEQDPHDGKRKVEGVWPIFRIHHQRSRYIYDLYHKRKAISKELYNYCIEKGVADENLIAKWKKPGYGNLCCLRCIQTRDTTHGTTCICRVPRSKLEEGRVVE
PF01125	Mbre_ChoanoflagellataCraspedida	MPKWGKSKKQPPEGWELIEPTIEELDMKLREAEQESHDGKRRCESLWPIYRIHHQKSRYIYDLYYKRKAISQELYDYCLKENIADRNLIAKWKKNGYENLCCLACVQTRDTQHGTTCICRVPRSQLPEGHVVECVTCGCRGCGG
PF01125	Sros_ChoanoflagellataCraspedida	MPKMSRSKRPPPEGWELIAPTLEQLDQKLREAENEPHEGKRKCETLWPVFRIHHQKSRYIFNLYYKRKAISKELYDFCVKEGHADPNLIAKWRKPGYESLCCLACIQTRDSNHGTTCICRVPRSKLSEECVRCGCRGCG
PF01125	Cowc_Filasterea	MPKIRHNRSKPPPEGWDDIEPVLNDFAQKMREAEAEPHEGKRRVESLWPIFRIHHQRTRYIYDMYYKRKVISKELYEFLLKDNYADANLIAKWKKQGYENLCCLRCVQTKDTNFQANCICRVPRASLEEGKAVECVHCGCTGCGG
PF01125	Crev_FungiZyg	MPKVQASRRGKMQPPEGWSDLEPTLEEFKQKMRDAENESTAGKRKVESTWAVMRVHHQRSRYIYDLFFKRKAISREIYDYCLKNGYADGNLIAKWKKQGFEKLCCLQCIQPRDTNYGTTCICRVPKDKLEKGRTVECVHCGCRGCAS
PF01125	Amac_FungiBla	MPKIKTSRTKAPPEGFDDIEPQLLEFEQKMREVEEDKTEGLRKAEASWPIFRLHHQRSRYVYELYYKRRAISKELYDYLVKQGYGDANLIAKWKKPGFENLCCLRCIQPRDTNFGTACICRVPKKNMEENKVITCHHCG
PF01125	Cang_FungiBla	MPKVRTSRTKAPPAGFDDIEAALGEFERKMREAEDEKSEGKAKHETAWAILRLHHQRSRYVFDLYHKRRAISKELYDYLVKEKYADAGLIAKWKKPGFANLCCLKCIQPRDTNHGTSCVCRVPRKDMADGKAVVCFACGCRGCS
PF01125	Nspp_Discicristoidea	MPKVRRARTVYPEGWELIEPTLKEFEKKFRDAENDPHEGKRRVESGWTIFKLHHQRSRYIYDIYHKRHAISKELYDFCLAEKYADAELIAKWKKPGFNNLCCLRCIQPRDTNFGSACLCRVPKDKVVDRIVECVHCGCRGCA
PF01125	Ddis_Amoebozoa	MPKIKTSKKKYPRGWDIISPTLDEFDIKMREVEASPYEGKRKNEVNWPIFRIHHQRSRYVYEKFYKNKEISRELYEFCLTEGYADKNLIAKWKKPGYERLCCLKCIQDLSHICICRVPKKDLTKGTILECSSCGCKGCAG
PF01125	Ppal_Amoebozoa	MPKIKTKRKKYPEGWEELEPKLDEFQQQMREAENEPHEGKRKVEVLWPIFRIHHQRSRYIYELFYKKDGISRELYEFCLNEGYADKNLIAKWKKIGYERLCCLRCIQTKDHNHSTCICRVPKDKLEEGNIVQCVQCGCKGCVG
PF01125	Mvib_Filasterea	MPKVRRSRKPPPEGFELLESTLDEFDEKMREVERDPHEGKRQKEALWPIYRIHHQRTRYVYDMFYKRKAISRELYDWCLKQGYGDPALIAKWKKVGYEQLCCLRCIQTRDTSHGTGCVCRVPRKSRDDDVVFECATCGCHGCSG
PF01125	Cneo_FungiDik	MPKIRTQRTKPPPEGFDDIQDVLEDYEKKMRDAESESHEGKRKVEAVWPIMRLSHARSRYIYDLYYKRELISRELYDWLLKQGYADANLIAKWKKNGYEKLCCVRCIQTRDMNFQGSTCICRVPKAQLKKGTVVECPHCGCRGCAS
PF01125	Umay_FungiDik	MPRLRTSRSTPPPEGFDEIQDMLDEYDRKMRHAETQDTQAKRKVETLWPIIQINHTRSRYIYDLYYKREAISRELYDWLLKYQYADANLIAKWKRTGYEKLCCVRCIQSRDMNYQGSTCICRVPSAQLRPGTVVECVHCGCRGCSS
PF01125	Ttra_Apusozoa	MPKIRTNRTRRPPQGFDDIVPTLDQFEEEMRRAENDDGVGKRKVQLTWEVLKLHHARTRYVYNLFYVRKVISRELYQWLVDEGYADALLMAKWKKAGYEKLCCLSCIQTRDHNFGTTCICRVPRAQLDSDRIVECAHCGCRGCAS
PF01125	Pbif_Breviatea	MPKVKRNRSKPPPEGWELIEPTVMEFEAKMREIENEEHEGKRICETTWPIMKLHHQRSRFIYELYYKKKEISRELYEWCLKMKYADAALIAKWKKSGYHHLCCLRCIQASGQNFKTACICRVPKSELPPDEVIECRICGCRGCA
PF01125	Spom_FungiDik	MPRLRTSRTKRPPDGFDEIEPTLIEFQDRMRQIENTMGKGTKTEMLAPIFQLHHQRSRYIYDLYYKREAISTELYNWLLKQNYADGNLIAKWKKPGYEKLCCLRCIQTAESKFGSTCICRVPKSKLDKDQRVRCTHCGCNGCAS
PF01125	Falb_Discicristoidea	RRTPPEGWDQIEPTLVEFQNRLRDVENDEALWPVIRIHHQRSRFFYECFYVRKVISRTLYDFCINERLADANLIARWRKPGFGRLCCLQCIQAAQTNFGTSCICRVPQDDLRPGTEAVECVTCGCRGCSG
PF01125	Rall_FungiCry	MPKIPKRKNRKIPEGFDLIEPTIKEFERKMREVESESSDTKRAVESPWGVMRVHHQRSRYIYDLYKRKAITKEVYDYCLNEGLADRHLIEMWKKPGYENLCCLLCIRTTDTNFGGTCICRVPKSQRSEKAAFQCPNCGCRGCCG
PF01125	Hnan_ChoanoflagellataAcanthoecidae	RKKTPEGFELIEDELDRFDMEMREAERDPHDGKRMVEALWPIHKIHYQKSRYVFDMFYKKKLIDKKVYDFCIKYKIIDAALVAKWKKQGYETLCSLTAIQTRDTTHGTTNMCRVPLSKRRVDGIRPSQTTGCISC
PF01125	Clim_Corallochytrea	MPRLRRQWHREPPEGFEIIEPTVRELQRRMAEAEREDTSTLKKNEITWSIYKVHYQTSRFIYDMYYKRKLITKEVYEWCLENDIGDRNLIAKWKKPGYDRLCCLKCMNPGQTNFATQCVCRVPKKDLADHQDVECTTCGCTGC
PF01125	Clii_Corallochytrea	MPRLRRQWHREPPEGFEIIEPTVRELQRRMAEAEREDTSTLKKNEITWSIYKVHYQTSRFIYDMYYKRKLVTKEVYEWCLENDIGDRNLIAKWKKPGYDRLCCLKCMN
PF01209	Acas_Amoebozoa	THFGFKNVRAKEKASMVGEVFHRVASNYDLMNDVMSAGVHRYWKDRFVTTLNPLPGTRILDVAGGTGDIAFRCLDRMKSTSTFFSKAPGTGQRASSSVTVCDINPSMLAVGKERGIARGYTESTDPSVAWVVGDAEQLPIDDASMDAFTIAFGIRNCTHIDKVIKEAYRVLKKGGRFMCLEFSHLENHLMQQVYDTYSFQVIPVMGHVVAANCGHLPFIVIRRFPRQEVFADMIGQAGFRAVTFENLTFGVAAIHSGWKL
PF01209	Ddis_Amoebozoa	THFGFKTVNKEDKESMVKDVFDSVSSSYDLMNDVMSMGIHRLWKDELINTLNPTPGSHLLDVAGGTGDISFRFLDKIKTSPNYFPNINKSNNGGGEVLKSSSLPSSATVFDINQSMLNEGKKRGLNKGYTDQSDPSIDWVQGNSEQLPFKDNTFNCYTVSFGIRNCTNIDQVLREAYRVLKPGGRFLCLEFSQVPNPLLRFAYDQYSFNVIPIMGQLISGDRDSYSYLVESIRKFPDQETFVQMIQDAGFKQVTYKNLTFGICSIHSGFKL
PF01209	Ppal_Amoebozoa	THFGFKTVQADQKESMVKEVFDSVASSYDVMNDAMSLGIHRLWKDEFINTLNPTPGSHLLDVAGGTGNKSASPPSSAIVFDINQAMLDEGKKRAIKLGYSDSTDPSIDWVQGNSEHLPFQSDTFNCYTISFGIRNVTNIDAALAEAHRVLKKGGRFMCLEFSHIPNPLLSYAYDTYSFNVIPVMGQLIAGDRDSYQYLVESIRKFPKQEEFAEKIRKAGFKQVTYKNLTFGVCAIHSGWKL
PF01209	Ttra_Apusozoa	THFGFRDVPVDEKKALVGEVFSNVADMYDVMNDLMSAGVHRVWKDQFVRALDPTPGMRMLDVAGGTGDIAFRCLDHAGRKPAGAATAPAKVTVCDINEGMLGVGRERAAADGRDPAGLEWVQGDAEALPFEDNTFDSYTISFGIRNTTDVAAALRESYRVLRPGGRFLCLEFSRVALPVLSQAYDAYSFQLIPLLGELVANDRDSYQYLVESIRQFPDQETFKAMIDDAGFRAVSYSNLSFGIAAMHSGFKL
PF01209	Nspp_Discicristoidea	THFGFRTVREGEKEVLVGEVFHNVARSYDLMNDVMSAGVHRLWKDALVARLGPGINTRLIDVAGGTGDISFRFLDAVGAATLPAGAKASVTVADINSSMLGVGRDRAVQTGRMSDRINFVVANAESLPFADASFDAYTIAFGIRNCTHVDSVLREAHRVLVPGGRFLCLEFSRVASVPGLAQLYDAYSFGVIPLLGEVVANDRASYQYLVESIRRFPAQDDFARMIREAGFRGVSYENLTLGVAAIHTGFKL
PF01209	Amac_FungiBla	THFGFRTVREEDKESLVRGVFSSVADNYDLMNDAMSGGVHRCWKSAFIERLAPAPDTRLLDVAGGTGDIALRFLDYVREQNGGALGAAHVTVFDINPEMLRVGAQRFSKLGLENGGPHVSFVEGNAEELAGIEDNSMDAYTIAFGIRNCTHIDRVIRQAYRVLKPGGRFMVLEFGKVNNPLLSTLYDAYSFRVIPHLGQILANDRDSYQYLVESIRKFPTQQQFVDMMKHEGFQVVGQGYEDLTFGVATIWSGWKL
PF01209	Cang_FungiBla	NETHFGFRSVPESEKQRLVAGVFSSVADSYDLMNDAMSLGIHRCWKNLYIDRLAPTQETRLLDVAGGTGDIAMRFLNYVKEHNGGQLGNAHVTVLDINPDMLRVGQERFKKMGYADDQHVTFIEGNGEVLEGIPDNSLDAYTIAFGIRNCTHIDRVIAQAHRVLKRGGRFMVLEFGKVNNPLLAAAYDSYSFRMIPHLGQILANDRESYQYLVESIRKFPTQDEFASMMKAQGFQVIGKGYEDLTFGVATIWSGWKL
PF01209	Bden_FungiChy	THFGFKTVNKDDKETLVGQVFRSVAGNYDVMNDFMSGGVHRLWKDHFINSLAPSPTTKLIDVAGGTGDIAFRFLDSVKRNHGGVGQAQVTVLDINPAMLQVGRERALKLGYPVDSPHISFQEANAEHLETIPDASVDAYTIAFGIRNCTHIDKVISEAYRVLKPGGRFMVLEFSSVQNPIIRSVYDLYSFRMIPILGELVANDRASYEYLVESIRKFPPQIEFAKMIQQAGFTVVGQGWEDLTFGIAAIHSGFKL
PF01209	Gpro_FungiChy	THFGFKTVNEEEKESLVGRVFANVADKYDLMNDLMSGGVHRLWKDHFIRTLAPSPTTKLLDVAGGTGDIAFRFLDYVKTANGGLGNASVTVLDINPSMLEVGKKRAATNGYSTDSDHISWRVGNAENLESIPDNTYDAYTIAFGIRNCTHIDRVLKEAHRVLKPGGRFMCLEFGKVETPIISNLYDIFSFEIIPTIGQAVANDRESYQYLVESIRKFPPQPVFRDMIRSAGFLVVGPGWEDLTFGVAALHSGYKL
PF01209	Spun_FungiChy	THFGFKTVREDEKESLVGQVFGNVASSYDLMNDVMSGGVHRLWKDHFIRTLAPGPTTKLLDVAGGTGDIAFRFLDYISATHPNPSPHVTLLDINPAMLAVGQQRAQQLGHTNIAFTEGNAERLEGIEDASVDAYTIAFGIRNCTHVDRVLREAYRVLKPGGRFMCLEFGSVENPVVARMYDLYSFHLIPTMGGLIANDRESYQYLVESIRKFPPQPVFADMIKEAGFKVVGKGWEDLTFGVAAIHSGFKL
PF01209	Ccor_FungiZyg	IKQAYRVLKPGGKLMVLEFSHVDNPVVSPFYDLYSFQVIPALGSLIASDSASYQYLVESIRKFPTQEKFAQMIRDEGFVTLGKGYENLTFGVAAIHTGYKL
PF01209	Mcir_FungiZyg	MNDAMSLGIHRIWKDEFIRSMAPGPGTKLLDVAGGTGDIALRFLDYCKNVHHDNTATVKLVDINAHMLGEGEKRFQKTPYAHTNQASFLVQNAEHLDEIPDESVDVYTIAFGIRNCTHVDKVVKEAHRVLKKGGRFMCLEFSKVDNPVIGKFYDIYSFDIIPALGQAIAGDRDSYQYLVESIRKFPPQEEFAQIIRDAGFKTIGKGYEDLTFGVASIHSGFKI
PF01209	Rory_FungiZyg	THFGFRDVAEEEKESLVHNVFANVASKYDVMNDAMSLGIHRIWKDEFIRTMAPGPGTKLLDVAGGTGDIALRFLDYCKNVHQDSTASVTLVDINPHMLGEGEKRFKTTPYAHTKQASFLVQNAENLTDIPDESVDVYTIAFGIRNCTHVDKVVKEAYRVLKKGGRFMCLEFSKVDNPVIGKIYDIYSFDVIPALGQIIASDRDSYQYLVESIRKFPPQEEFAQIIRDAGFKTVGQGYKDLTFGVASIHSGFKL
PF01209	Mver_FungiZyg	THFGFQNVPENMKEALVKQVFANVATKYDVMNDVMSGGVHRLWKDHFIRTLAPTPGTKLLDVAGGTGDIAMRFLDYCKETHGDNTAQVTVFDINPNMLQVGQERFTKTPYHNTSQVSFMEGNAENLEHIPDNSMDAYTIAFGIRNCTHVDRVLKEAYRVLKPGGRFMCLEFSKVENPVISKVYDVFSFDVIPAMGQIVANDRDSYQYLVESIRKFPPQKEFAKMIKDAGFTVMGQGYEDLTFGVAAIHSGFKL
PF01209	Rirr_FungiZyg	THFGFKSVPENMKETLVGKVFENVATKYDVMNDAMSLGVHRLWKDHTIRTMAPGPGTKLLDVAGGTGDIAMGFLNYCKEIHGDTSAKVTLLDINPKMLEVGKQRSSQVTFEVGNAEDLSSIPSNSYDVYTIAFGIRNCTHIDRVLHEAFRVLKPGGRFMCLEFGKVRNPLVSSIYNLYSFQIIPLIGQIIASDKDSYQYLVESIRQFPSQEQFAEMIMNAGFTIVGDGWEDLTFGIAALHSGFKL
PF01209	Crev_FungiZyg	FGFKTVPEEVKESLVRNVFSSVASNYDMMNDAMSLGIHRLWKDHFMRNMAPTPGAKLLDVAGGTGDIAHRFLNYQDNINCDSTSTVHMVDINPDMLREGERRFSDSKWKQEGRIDFTVGNAENLDFIKDNSFDAYSIAFGIRNCTHPDRVVREAFRVLKPGGRFMCLEFSRVTNPLLAVAYDLHSFYVIPKLGEIIANDRNSYEYLVESIRKFPTQDDFAQIIREAGFTTIGSGYENLTFGTVAIHSGFKF
PF01209	Adig_Metazoa	SHFGFQAVSEKDKTQKVYRVFENVASSYDKMNDVMSFGIHRLWKDRLVRVLNPPAGTKLLDVAGGTGDIAFRFLNHVKSEKLPQSKVKSGSTDSHVTVCDINKAMLDVGQKRAQTFHHFSGISWIQGNAEELPLSSGSFDAYTIAFGIRNVTRMEKALSEAYRVLAPGGRFLCLEFSEVQNSLLARAYERYSFDMIPVMGHIIAGDWESYQYLVESIRQFPDQEEFAGMIENAGFSNVTYENLSFGIAAIHSGFKL
PF01209	Nvec_Metazoa	THFGFETVTEQEKTEKVYHVFENVATSYDVMNDLMSFGIHRLWKDRFISVMNPAPGTKLLDVAGGTGDIAFRFLNHTKKKAKQKKETENLSSHVTVCDINKYMLRIGKKKGQTLNLKKGISWVAGDAQSLPFADDSFDAYTIAFGIRNVTRIQEALYEAFRVLSPGGRFLCLEFSEVTNPVLARLYDGFSFNVIPVMGHVVASDWNSYQYLVESIRQFPNQEEFKGMIEDAGFRNVTYENLSSGIAAIHSGFKL
PF01209	Bflo_Metazoa	THFGFESINESEKTGKVHEVFSNVASKYDVMNDAMSLGVHRLWKDRFMQVLDPLPGTRLLDVAGGTGDIAFRFINWIKEKELQQKKAKFPSAEDYLYSEQREDTTGTDDRKDSKVIICDINQSMLEVGKERAKKLGLEDDVVWVTGNAEELPFPDNSVDAYTIAFGIRNVTHIEKVLCEAYRVLTPGGRFLCLEFSQVSNPLLSSVYDLYSFQVIPVLGELIASDWKSYQYLVESIRKFPNQEEFAEMIREAGFRMVSYENLTSGVAAIHSGFKI
PF01209	Xtro_Metazoa	THFGFQTVSEEEKGEKVYRVFENVAHNYDIMNDAMSLGVHRFWKDWLLQLMKPTPGMQLLDVAGGTGDIAFRFINYIRAQREKWIRQELKLQQDLSWPDISKTYQNKEQSSLMGSRAVICDINKEMLRVGLQKSLRLGYSEGLSWVAGDAEELPFDDDKFDVYTIAFGIRNVTHIEQALQEAYRVLKPGGRFLCLEFSQVNNPMLSKLYDIYSFQVIPVLGEVIAGDWKSYQYLVESIRRFPSQEEFKALIEDVGFCKVNYHNLTNGVVAVHSGFKL
PF01209	Ocar_Metazoa	GYASAMKWVEGNAEGLPFSDDSFDAYTVAFGIRNVSDMEKALREAHRVLVPGGRFFCLEFSHVKNPILQRLYETYSFEVIPILGEIIAQDRAAYQYLVDSIAAFPNQERFAETIRRAGFKAVEWENLSGGIAAIHSAYKL
PF01209	Hnan_ChoanoflagellataAcanthoecidae	ASFGFLRVPKELKEGLVGEVFKRVAPQYDKMNDAMSFGVHRLWKRHFVAELNAQDGTRLLDVAGGTGDIAFRCLERAGATASTGPLVTVCDINAAMLEQGKVRATQLGPVAGRCTWVEGSAEELPFPDASFDAYTISFGIRNVTNIDKALEEAHRVLVPGGRFMCLEFSQVSNPALRAVYDKYSFEVIPVMGEVIAGDMPSYQYLVESIREFPDQQKFATMIKAAGFQHVTYENLTGGVAAMHSGFKF
PF01209	Ctel_Metazoa	ETVRESEKEERVHKVFHNVASSYDVMNDAMSAGVHRLWKDAFIQRFAPPPGTKLIDVAGGTGDIAFRFLNYMNKEHGTSSRPLDIEIPSRIQMEGFSEVQSEEDPTTSPSQNAHVTVFDINQAMLDEGKKKAERLGFTEDLSSWVCGNAECLPMDDNQFDAYTIAFGIRNVTHIEKVLTEAYRVLKPGGRFMCLEFSEVPNPVLRKIYDEYSFQVIPVMGQVIAGDWHSYQYLVESIRQFPNQETFATMIRDAGFKFVRYENLTFGVAAIHSGIK
PF01209	Lgig_Metazoa	QTVPEDEKEEKVYEVFENVASKYDLMNDAMSAGVHRLWKDHFIHRMAPVKGTSLIDVAGGTGDIAFRFLNSINQQIKPLVTVCDINQAMLDVGKSRSESLGYLSDVNFIKGNAECLPIENDQFDVFTIAYGIRNCTHIDKVIQEAYRVLKPGGRFMCLEFSDVKNPIIRQLYDSYSFQVIPVMGQVLASDWKSYQYLVESIRQFPNQEDFKQMIKEAGFKMVKYENLTFGVSAIHSGFK
PF01209	Mlei_Metazoa	NSEKETHFGYQSIPESEKEEKVKEVFERVADTYDLMNDAMSLGVHRLWKDHFVKSAAPKPTFKCLDVAGGTGDIAFKLHKYMRNVNRDCEKIVVCDINTEMLRVGEERAAQMGVGENFTWVEGNAEVLQFPDNTFDLYTIAYGIRNCTHIDKVLEEAYRVLKPGGRFMCLEFSEVNNPLISQVYDKYSHDVIPVMGQLIAGDFESYQYLVESIRKFPNQETFAEMVAAAGFEVVEYENLTFGVTAIHSGYKL
PF01209	Dpul_Metazoa	FGFQTVLASEKAEKVHKVFENVASKYDLMNDVMSVGIHRIWKDYFVKKMFPLPPGTSIIDVAGGTGDIAFRMLQSIERQNKHFDVSGTEKNSSILISDINQAMLDVGKERASKMNLQSDMLSWLCADAQQLPLADNSFDLYTIAFGIRNVTEISKALDEAYRVLRPGGRFLCLEFSHVNNPLLKQVYDTYSFQIIPPLGEVFAGDWKSYQYLVESIRKFPTQDRFKEMIEEAGFRSVKYENLSFGVVSIHSGYKI
PF01209	Hmag_Metazoa	THFGYEKVAENIKSEKVHDVFKNVADSYDLMNDLMSAGTHRLWKEYFVKCLNLKSGMKILDMAGGTGDIAFKMLDHAPSSEPTIDIVISDINQAMLDVGKKRACKLGIAEEFKWVCADAESLPFEDESFDLYTIAFGIRNTTHIDKVLDEAYRVLKPGGRFSCLEFSNVSNPLIRSIYDTYSFQVIPVMGELFASDWKSYQYLVESIRQFPDQEAFSNLIYNAGFSNVTYHNLTFGVVSIHDGFKL
PF01209	Apar_IchthyosporeaIchthyophonida	ADFGFRKVKEEEKAQLVGQVFHSVAQSYDLMNDLMSGGVHRLWKDYFVQKLGPLPGTKILDVAGGTGDIAFREVDFMRTASPTHGGSVVVCDINTSMLEVGKQRARERGYRDEEISWVAGDAEKLPFDDNTFDAYTIAFGIRNVTHIDQALSEAYRVLKPGGRFMCLEFSRVNNPVIKTLYDAFSFEIIPVIGELVANDRASYQYLVESIRKFPDQERFLAMMVQAGFKAATFEDLTFGVTAVHSGFKL
PF01209	Cfra_IchthyosporeaIchthyophonida	SDFGFTKVKTEEKYKHVREVFHNVADNYDVMNDLMSGGVHRLWKDYFVSKLGPTPETRVLDVAGGTGDIAFRIIDQIDHSQRSFQSISSSLPPVVVCDINTSMLRVGTQRAEARGYSHESLSWVAGNAEKLPFEDNSFDAYTIAFGIRNVTHIDAALREAHRVLKPGGRFLCLEFSTVANPVVSSIYDSFSFEVIPVIGHLVANDSASYQYLVESIRKFPDQETFSRQIKEAGFSNVSHENLTFGVAAIHSGFKL
PF01209	Ihof_IchthyosporeaIchthyophonida	READFGFKRVKEGEKEKLVGDVFHQVANTYDLMNDLMSGGVHRLWKDYYVGKLGIVPGVKILDVAGGTGDIAFRHIDIMRQANQMLKKFERKGENVIKSESESEKETVKKGSVVVCDINTSMLEVGKQRAKERDYNEDEITWVHGDAEKLPFEDNTFDAYTIAFGIRNVTHIDKALKEAYRVLKPGGRFLSLEFSKVTNPVVSCAYDTFSFNVIPSIGHMVANDRASYQYLVESIRKFPDQETFLSMIVSAGF
PF01209	Ihou_IchthyosporeaIchthyophonida	VFHQVANTYDLMNDLMSGGVHRLWKDYYVGKLGIVPGVKILDVAGGTGISTGIRNVTHIDKALKEAYRVLKPGGRFLSLEFSKVTNPVVS
PF01209	Colp12	THFGFKDVPESAKAKLVGEVFHNVAGKYDLMNDVMSGGVHRLWKDYFISKLDPQPGTKLLDVAGGTGDIAFRFLNYANEVGRARRLGRHFTKATAIVCDINPSMIQVGKDRAMQKEIDGSALSWVVGDAEQLPLRDECVDAYTIAFGIRNVTHIDRALKEAHRVLKKGGRFMCLEFSHVSNPLVRGVYDAYSFEAIPRFGEFFASDRDSYQYLVESIRKFPKQEDFCRMIETAGFEYVTYENLTFGVAAIHSGFK
PF01209	Clim_Corallochytrea	THFGYQTVDEDEKEDKVRAVFSNVADSYDLMNDAMSAGVHRLWKDHYIAKLGPRPGMKLLDVGGGTGDIAFRFAKYMQQNHARALMEAEGPIVTVFDINAEMLEVGKQRMSSMGISENIMEWVQGNAEALPFEDNTFDAYTIAFCIRNTTHPDQVVREAYRVLKPGGRLMVLEFSQVPYPALKQLYDLYSFNVIPEMGRLLADDRDSYQYLVESIRRFPDQETFAGIVREAGFKEVDYENLTFGVAAIHSGFKL
PF01209	Clii_Corallochytrea	KRKTHFGYQTVDEDEKEDKVRAVFSNVADSYDLMNDAMSAGVHRLWKDHYIAKLGPRPGMKLLDVGGGTGDIAFRFAKYMQQNHARALMEAEGPIVTVFDINAEMLEVGKQRMSSMAISENIMEWVQGNAEALPFEDNTFDAYTIAFCIRNTTHQVVREAYRVLKPGGRLMVLEFSQVPYPALKQLYDLYSFNVIPEMGRLLADDRDSYQYLVESIRRFPDQETFAGIVREAGFKEVDYENLTFGVAA
PF01209	Sdes_IchthyosporeaDermocystida	ENSAKTTHFGFQTVAEVEKENLVKSVFKNVAGNYDVMNDAMSFGIHRLWKDIFMKTMNPFPGTRLLDVAGGTGDIVFRFMEYDANSVDASLPSSATVLDINPSMLEVGKQRASVRGYSESQIQWVEGNAEQLPFASESFDVYSIAFGIRNCTHIEKVVQEAYRVLVPGGRFMCLEFSRVPYFGLRQLYDLYSFNVIPLMGEVIARDRSSYQYLVKVFVNFRNNQNLHKL
PF01209	Nk52_Ichthyosporea	KDETGSTHFGFKTIKEEEKETLVGNVFKSVAGNYDIMNDVMSGGVHRLWKDYFIQKLNPVDGSRLLDVAGGTGDITFRFLDYRNSKGEKNMNSNATVLDINPAMLEVGKKRAPSFGYGGDSRITWVEGNAEHLPFPDNSFDVFTMSFGIRNCTHIDKVVEEAHRVLVPGGRFMCLEFSHVPYMGVKDVYDFYSFNLIPFFGEKIAGDRDSYQYLVESIRKFPDQETFCSIIREAGFKRVSYENLTLGVAAIHSGFKL
PF01209	Tadh_Metazoa	THFGFQTVYEDEKEVKVAEVFHNVANKYDLMNDAMSFGIHRLWKDTFVRQLNLQSGLNIVDVGGGTGKVNQRVKNSMDKNTQENIPNCAISVIDINQSMLDVGKTRGKELGYQGDIKWIKGDAENLPVKDSSADLVTAAFAIRNVTNIRKAISEAYRILTPGGRFSVLEFSHVTNPYLKSLYDTYSFEMIPVMGEIIAEDWKSYQYLVESIRQFPTQSEFADMFKQAGFRFVRFQNLTFGTVAIHSGFKI
PF01209	Umay_FungiDik	THFGFKTVAEEEKESMVASVFSSVASKYDVMNDAMSLGIHRLWKDHFVSKLDPRGGIKVLDVAGGTGDIALRILDHARTKHFDRETHVTVLDINPSMLKEGQKRFKQTMYWGGPQVSFQLGNAEQLDPIPDESIDLYTIAFGIRNCTHIDEVLRQAYRVLKPGGVFSCLEFGKVNIPFLAEAYKQYSFNVLPPLGQMLAGDRASYQYLVESIERFPTQPQFARMMKDAGFHLPGSXWEDLTFGVATIWTGIKL
PF01209	Spom_FungiDik	THFGFKDVPEDEKEHLVKNVFSSVAKKYDEMNDAMSLGIHRLWKNIFVSRLNPGNSTVPMKILDVAGGTGDIAFRILNHATNHNGDRNTRVIVADINPDMLSVGLRRSKKTPYYDSGRVEFIEQNAEILDKIPDNSIDMYTIAFGIRNCTHIPKVLEQAYRVLKPGGVFSCLEFSKVYPAPLAELYRQYSFKILPLLGTIIAGDSQSYEYLVESIERFPDAKTFAKMIEDAGFTLAGETGYETLSFGIAAIHTGIKL
PF01209	Cneo_FungiDik	THFGFREIPEDQKETLVGGVFSSVASSYDLMNDSMSLGIHRLWKDSFVSSMLPRLPPSFHRNPSDTVTEKPVFKCLDVAGGTGDIALRILDRAKDKFACRDIEVEIVDLNEGMLNEGRKRVAKTMYYNTPQIKFTHGNAQHLPSHIADNSIDLYTIAFGIRNCTSLPAVLSEAYRVLKPGGKIGVLEFGKVTNPLFREIYRQYSFQFIPVMGKILAGDSESYQYLIESIERFPSQPEFAKLVQEAGFKTGQMREGRGGAWTDYTNGIATVWTGVKV
PF01209	Aque_Metazoa	TSFGFQQVSEKTKATKVQEVFSSVAANYDLMNDVMSLGLHRLWKDYFVTKLAPPTGSKIIDVAGGTGDIASRIVQYSDRRVGGAESSDEELQVTVVDINKEMLTEGEKRFKNNENIKWVHGDALSLPFPSNHFDAYTIAFGIRNVSNFEQALSEAYRVIKEGGRYLCMEFSQVDNIALKSFYDAYSFQLIPVFGELIAQDRPAYQYLVESIREFPDQESFSNMIEGVGFVNVNYESLLGGVVAIHSGFK
PF01209	Mvib_Filasterea	KKADLVGQVFSSVADKYDVMNDAMSGGIHRLWKDTFVRHRLNAPPGTRLLDVAGGTGDIALRFLRHARTQVRPVDCTAPTQVVVCDINQDMLNAGMAKAQSIPLETDEQLDWVCGNAECLPFDDASFDAYTIAFGIRNVTHIDKALLEAFRVLRPGGRLLILEFSHVEQPLLKPLYDLYSFQVIPVLGHLIAGDHDSYAYLVESIRRFPRPAVFSDMIRHAGFRLV
PF01209	Ppol_Amoebozoa	THFGFRDVPKEQKESLVGEVFKKVASKYDVMNDLMSFGIHRLWKDGDIAFRCVEAIRKSPDFFPRRAADPAATPAAKSPFSDVSKVVVLDINPSMLEVGKEKTDPVLDWVVGNAQQLPFPDNCMDAYTIAFGIRNCTDVPVVLRKAHRVLKKGGRFMCLEFSQVNPPMLRSLYDFYSFNFIPVWGQLIANDYNSYQYPVESIRKFPNQETFAQMIEDAGFSMVNVTNLTFGIAA
PF01209	Skow_Metazoa	FGFTKVTKDSHGELVSMVFKNVANRYDLMNDVMSFGIHRLWKDRFMEVLNPMPGTRLLDVAGGTGDIAFRFIDYIKRQGGLMGPLRTKLHDVETSSSSESSSSDSEYNIQETEKFSNVTLVDINEKMVKVGKRRAREEGYDQGISFIVGDAQDLPIEDESVDAYTIVFGI
PF01233_PF02799	Acas_Amoebozoa	GKDVKTKKPHMWYVAQVEVDLNNGKKVLMSTRMSDGLRQPFNVLTLFAKLYHDLKKQEQEFLQQQAAAALNQGPAPHKPLEGDNEAFEPNKPVDQVQQEPFKLNDLFEWSDVNIEVPDELDELYNLLYENYVEDDDNMFRFDYSKDFLLWALKPPGWRGEWHAGVRVKTSKKMVAFISAIPALISVRGKQLKMVEINFLCVHKKLRDKRLAPLLIKEITRRVNLTGIFQAVYTAGTVLPTPKKLVNVGFSHLTRRMTLPRAVKLYKLPAAPLTPGIRPMEQKDVKQVAALIKAYLVRFGLAPVFSKTEVAHWFLPRTDVIVSYVVEDKATGKITDFLSFYSLPSTIIGNPTYKTLRAAYSYYNVAGKTPLKNLMQDALILASSLGYDVYNCLDLMDNES…
PF01233_PF02799	Ddis_Amoebozoa	KMADDKKKQLEESKRLVELFKASSLASKKPKGHEFWDTQPVPKIDDKIIESGPIENKTLDDVRKDPLTLPPAFEWIELDCNKPEELKEIYTLLYENYVEDDDNMFRFDYSPEFLKWALQPPGFLKEWHIGVRVVESKKLVGFISGIPATIRVEGKPITMVEINFLCVHKKLREKRLAPVLIKEVTRRVNLRNIWQAAYTAGVVLPKPVAICKYWHRSIKQQKLVEVGFSAIPPKMTMASMVKLYRINDEMKHPLRPLTKEDVPSFKVLLDDYLSKYKIAPEFTTDEDVWHWFETRKDVITCYVKVDESTKKVTDAFSFYNLPSTIIGNAKHNTLKAAFSFYNVATTMSITDLVGDALVTAKKMDYDVFNCLDVFENSTFFKDLKFAVGDGDLQYYLYNY…
PF01233_PF02799	Ppal_Amoebozoa	HAFWDTQPVPKIDAQVEKSGPIEVKTLDDVRKEPLTLPALFEWVVLDVNDQVQLNDVYTLLNENYVEDDDNMFRFDYSIPFLKWALQPPHYLKDWHIGVRVKESKKLVAFISAIPATINVDKTDSVKMVEINFLCVHKKLREKRLAPVLIKEITRRVNLQNIWQAAYTAGIVLPKPVASCRYYHRSLNPKKLVECKFSSLPPRVSMSLLIKLNRVEENTKCPGIRPLTKADVPSATRLLAKYLSQYSLAPSMSEEEVWHWLAPQKNVMDCYVVVDPKTGEVTDMCSFYTLPSSVIGNPKHKTLKAAFSFYNIATSVPLVDLMADALHLAKKGDFDVFNCLDIFENSKFIKEHKFQPGDGNLQYYLYNYATQTKDPSAMGLVL
PF01233_PF02799	Ttra_Apusozoa	HKFWDTQPVPKLSEDTPDDVNEPIVPEYEEIRQEPYKLPPGFEWSIIDIDAPEQLTEVYTLLAKNYVEDDDCMFRFDYSREFLCWALKPPGWLPQWHLGVRSTKKKSLLAFISAVPADIHVRGTSVPNVEINFLCVHKKLRTKRLAPVLIQEITRRVHLEGIFQAVYTAGVVLPRPIASCMYYHRSLNPKKLVEVEFSYLKPNMTMKRLIRLYKLPNEPVLKGLRPMTPADVPSAAELLRNYLTSMDLYQRMSDEEFAHWLLPRDGVVSSYVIADDNGNVTDFCSFYSLPSTIIDHPKYNTLNAAYSYYNVATSVELKTLMNDALILANSAGFDVFNALDLMDNADFLTDLKFGKGDGHLQYYTFNWRTAPTTPSKIGLVL
PF01233_PF02799	Adig_Metazoa	EDVAKTEQAAASGAVKKKKKKKKPKATTALGTEVLTPDALQSAGVSLNQLRQLQNLQKSFELLQAGDPKAPKTTEEALKKTYKFWDTQPVPKLGEDVSECGSIEDNIPIDEVRSEPYTLPQGFVWDTLDISDEKVLKELYTLLNENYVEDDDNMFRFDYSSEFLLWALKPPGWKMPWHCGVRVASNKKLVGFISAIPAHIKVYDKTVLMVEINFLCVHKKLRSKRVAPVLIREITRRVHLEGIFQAVYTAGVVLPKPVACCRYWHRSLNPKKLIDVKFSHLSRNMTMQRTMKLYRLPEEPKTRGIYVLTSDDMTAAYKKMTEYLNKFSLAPAFSEEEFKHWFTPREGIVDSFVVKDKSGNVTDMISFYTLPSTVMHHPVHKQLKAAYSFYNVSEETPLI…
PF01233_PF02799	Nvec_Metazoa	QQLKNLQRYFEVLRLNEGKPAKTTEEAKKKTYQFWDTQPVPKIDDEVKESGPIEDNKSVEEIRPEPYSLPQGFVWNTMDIGDPAVLKELYTLLNENYVEDDDNMFRFDYSSEFLQWALKPPGWKMDWHCGVRVASNNKLVGFISAIPAHINVYNEPKMMVEINFLCVHKKLRSKRVAPVLIREITRRVNKEGIFQAVYTAGVVLPKPVACCRYWHRSLNPKKLIDVKFSHLSRNMTMQRTVKLYRLPEAPETKGIVKLSEDYLKKFSLAPNFTEEEFRHWFTPRKGIIDSYVVQDENKKVTDMISFYTLPSTIMHHPVHKQLKAAYSFYNISTSTPLIQLMQDALILAKQDDFDVFNALDLMDNKEFLEKLKFGIGDGNLQYYLYNWKCPDMKPQQIGL…
PF01233_PF02799	Xtro_Metazoa	MAEDSESAASQQSLDLDDQDTCGIDGDNEDEAEHAKGSPAGDLGAPNSGGTKSDSASDSQEIRTQQPSKNPAIPMQKLQDIQRAMELLSACQGPAKNLDEASKRKYQFWDTQPVPKLNEIITCHGPIEPDKDNIRQEPYSLPQGFMWDTLDLSNSEVLKELYTLLNENYVEDDDNMFRFDYSPEFLQWALRPPGWLSQWHCGVRVSSNKKLVGFISAVPASIRIYDTVKKMVEINFLCVHKKLRSKRVAPVLIREITRRVNLEGIFQAVYTAGVVLPKPVSTCRYWHRSLNPRKLVEVKFSHLSRNMTLQRTMKLYRLPDATKTAGLRPMERKDIPMVQHLLNDYLKQFYLAPFMNEEEVAHWFLPQDHIIDTYVVESSNGVLTDFLSFYTLPSTVMHH…
PF01233_PF02799	Bflo_Metazoa	SQDNMVTKKKSKKRKKKKGGEAAAAGGDAEKTDDGFPLQKLQEVQRALQQLSVHQQPKSVDEARDKKYEFWDTQPVPKIGEDVKGYGPIEADKPQSEVRQEPYSLPQGFEWDTLDISKPDVLSELYVLLNENYVEDDDNMFRFDYSKDFLLWALKPPGWLLQWHCGVRVVSNKKLVGFISAVPAAIRIKDHLQKMVEINFLCVHKKLRSKRVAPVLIREITRRVHQQGLFQAVYTAGVVLPRPVAKCRYWHRSLNPKKLIEVKFSHLSRNMTMQRTIKLYKLPDEPKTAGLRPMVKSDIPQVHALLDQHLQKFNLSPVFSLDEFEHWFLPREGIIDSFVVEEEAGGEKTITDFISFYTLPSTIMHHPQYTQLKAAYSFYNVNNKHSLLDIMNDALILAK…
PF01233_PF02799	Dpul_Metazoa	MELLSLTHSQGAVKTTEDAMAKQYEFWSTQPVPKINEDITVNEPIEPDTPFSEIRPEPYTLPQGFVWDTLSLDNPQTLQELYQLLNENYVEDDDNMFRFDYSADFLLWALKPPGWYKDWHCGVRAEKSGKLLGFISAIPATIRIYNHTQKMVEINFLCVHKKLRSKRVAPVLIREITRRVHLKGIFQAVYTAGVVLPKPVSTCRYWHRSLNPKKLIDVKFSHLARNMTMQRTLKLYRLPEETKTPGFRTLELKDIEQAYRLLNTYLNKFHLAPCFDEEDFRHWFFPRPGIVDCYVVENGGIITDLVSYYTLPSTVMHHPVHKSLKAAYSFYNASSTTPWNQLMSDALVTAKNAGFDVFNALDLMENKTFLEPLKFGIGDGNLHYYLYNWRCPDMPSNSV…
PF01233_PF02799	Ctel_Metazoa	VPLDKLHQIQKAMEMLNMPQGAPKSIEQARRKQYQFWETQPVPKIDEEIDKNESIEPDKPQGEVRQEPYSLPGGFHWDTLDIVQPLVLKELYTLLNENYVEDDDNMFRFDYSPEFLKWALQPPGWRQDWHCGVRVAKSGKLIGFISAVPAKIKVYDKKQKMVEINFLCVHKKLRSKRVAPVLIREITRRVNCTGVFQAVYTAGVVLPKPVASCRYWHRSLNPRKLIQVQFSHLSRNMTMQRALKLYKLPDSPQVPGFRAMTVADIPQAHKILGEYLAKFQLSPVFTEDEFKHWFLPRENIVNSFVVEVKGKISEFVSFYTLPSTVMHHPTHKSLWAAYSFYNVSNNVPWVQLMQDALITAKKLGFDVFNALDLMENKEFLEDLKFGVGDGNLQYYLYNW…
PF01233_PF02799	Lgig_Metazoa	MQQQKAAGLQSIQRAVELLSIRDSAKTIQDAKKKTFQFWRTQPVPKLDEEVVGNDHIEPDKPVTEVRDEPFTLPTGFKWNTLDIQDPVVLKELYTLLNENYVEDDDNMFRFDYSSEFLRWALMPPGWLQNWHCGIRVIKSDKLVGFISAVPAHVKIYDKTKKMVEINFLCVHKKLRSKRMAPVLIKEITRRVHKQGLFQAVYTAGVVLPKPVAVCRYWHRSLNPRKLIDIKFSHLSRNMTMQRTLKLYKLPEVPKTAGFRPYKPTDIQQCHKLLNKYLSKFDLSAVFSLDDFDYWFTPRQGIVDSYVVEKNGKITDFVSFYTLSSSVMHHPTHKNLKAAYSFYNVSSGTPWKDLILDTLVVAKSMEFDVFNALDLMDNKKFLEELKFGMGDGNLQYYLY…
PF01233_PF02799	Ocar_Metazoa	EAKSRSYEFWKTQPVPTFTEKITDETNEAIEPNKEDIRPEPFSLPDPFEWDTLDLDQREILDELYVLLWENYVEDDDNMFRFDYSREFLIWALKPPGWKLTWHCGVRAKKNKKLVGFISAVPARIKIYEHTQVMVEINFLCVHKKLRSKRVAPVLIKEITRRVHMEGIFQAVYTAGVILPKPVAVCRYWHRSLNPKKLIAVKFSHLSRHMTMQRTLRLYRLPEETKTAGLRKAEDRDMPQVTRLVNEYLGKYDLVPVFEEEEARHWLTPREGIVYCYVVEDVKTKVVTDVISFYSLPSTVVDHPEYKDLRAAYSFYNVSTVTPLVDLMQDALILAKNADFDVFNALDVMENKSILEKLKFGVGDGNLHYYLYNWRCSSMEPNKVALVLQ
PF01233_PF02799	Mlei_Metazoa	MFRFDYSAAFLKWALRPPGWRAEWACGVRVSSNKKLVAFISAIPATIEIHGKEKHIVEINFLCVHKKMRSKRVAPVLIREITRRVNATGIFQAVYTAGVVLPKPIATCRYWHRSLNPKKLINVQFASLSKNMTMQRTIKLYKLPELNEYLAKYKLHQRFTLEEFEHWFLPRKDIVYSYVVESPTGDVTDFISFYSLSSTIMNHPQYKSLYAAYCFYYFNGSMSLKDLMYDTLIMAKKNNFDVFNALDLMENKPILDDLKFGMGDGNLHYYIFNWVCPNIEPSQVGLVLQ
PF01233_PF02799	Skow_Metazoa	STEDDKDARAPNQSAQSVAKLQEIQRAIELLGIQQKAAPKTEEEAKRKNYEFWDTQPVPKIDEKIDKAINEAVEPNRDDVRQEPYSLPQGFMWDIVDIKNPVNLNELYTLLNENYVEDDDNMFRFDYSPEFLTWALLPPGSLPFWHCGVRVVSNKKLVGFISAIPAKIKVYDHVQTMVEINFLCVHKKLRSKRVAPVLIREITRRVNMQNIFQAVYTAGVVLPKPVATCKYWHRSLNPRKLIEVKFSHLSKNMTMQRTIKLYKLPEKTKLPIRQLQKKDVAQCCKLLNDYQNNFSLSPLFSEDEFEHWFCPRDDIVDAYVVESEGVITDFFSFYTLPSTIMHHTQHKKLKAGYSFYNVSTKTPLIDLMQDALILAKQKDFDVFNALDLMDNKSFLEQLK…
PF01233_PF02799	Hmag_Metazoa	EESNHLTDKLISKTNAEGKTQKKTAQNDDSNSNKLEDLECGDDHTKLDNDNNEQIKASYASDIQKAIQKMIISSENKREESTKKKSYAFWETQPVPKLDEVVPPNINEAVEEDKSEIRQEPFTLPAGFVWDTIVISEESQLKELYTLLNENYVEDDDNMFRFDYSPQFLQWALKPPGWKLQWHCGVRVASNKKLVGFISAIPAHIKIYDKNVRMVEINFLCVHKKLRSKRVAPVLIREITRRVNLEGIFQAVYTAGIVLPKPVGTCRYWHRSINPKKLIEVKFSHLRRNMTMQRTIKLYKLPENTKASLSPLTPADLKSAYKIVFEYLKNFQLAPIFTEEEFAHWFLPRDGVISCYVVKDIDSGNVTDLVSFYQLPSTVVDHPKYNSLKAAYSFYNVVT…
PF01233_PF02799	Aque_Metazoa	KKRKKKDKKGGARGAESSALPKSVIDESQILTTRKLQEIITNLSIQEQPRGHEFWDTQPVPKFDETVTDAGPIEQDKEHVRSEPFTLPDKFYWDNVDLTDDAQLTELYKLLNENYVEDDDNMFRFDYSCEFLRWALQPPGWLPQWHCGVRVEGNKKLVGFISAIPATVRIRDHTQVLVEINFLCVHKRLRSKRVAPVLIKEITRRVNFEGIFQAVYTAGILLPKPVAVCRYWHRSINPKKLVEVQFSSLHRRMTLQRMLRLYRLPDETKTPGLRLMEPRDVPAVHRLFGQYMSRFDLVPVFQTEEEISHWFFPRSDIVYTYVVEDPATKELTDFVSFYNLPSSVVNHPVHKTLKACYSFYNISTKTPFKELLYDALVLSKKCGADVFNALDIMDNEPVF…
PF01233_PF02799	Bden_FungiChy	KSSKESAASTSTAASQSQVDVQDKASVERIEKIMEKLNTLKMMQSPANEALQKKLPKEDMSQYRFWNTQPVARTDEEVSTDGVIEPNKQPEEIQQDPYPLHKEFEWTLLNFEDEQEIKDVYQLLSANYVEDDEATLRFDYSAEFLKWALMPPGWRSDWHVGVRAKTSKKLVGFIGATPATVNVRTNKIPMVEINFLCVHKKLRSKRLAPVLIKEITRRVNLAGIFQAAYTAGVYLPTPVSTCRYYHRSLNPKKLVDTGFSYIPRNMTMARMIRLYKMPDEPKTPGVRPMTLEDVPQVKKLMSEYLSRFELFHDMTEEEIAHWILPVDKVMYSYVVYDDQKKKVTDFFSFYSLPSTVIGNPVHSHINAAYLFHYAPMGMGEDPARIQLLINDALILAKKA…
PF01233_PF02799	Apar_IchthyosporeaIchthyophonida	PAHSKEEALQRDYKFWVTQPVPQLGQDVPQLGPIEPSRPREEVQQDPYPLPAGYAWCPLDLDKSEKDLNDVYDLLNLNYVEDDENMFRFDYSKEFLLWALMPPGWKASWHVGVRTTTSNKLVAFISAVPASMRIHDNAQLLVEVNFLCVHKKLRAKRLAPVLIKEVTRRVHLEGIFQATYTAGVYLPTPVTSARYYHRSLNPKKLIEVGFSYLPRNTTMQQVIKRNKLPENTHTPGLRPMEKRDVEAAWTLVCDYLKKFKLAPSFEKNEFEHWMLPRQNVISSYVVEDPETHSITDFISFYTLNSTIIKHDTHKTLFAAYSYYNVANTCTLDLLMTDALILAKKGGHDVFNCLDLMDNSKVLESHKFGMGDGRLQYYLYNYACPEMQPSELGLVL
PF01233_PF02799	Ihof_IchthyosporeaIchthyophonida	WCPMDLESTKDLDDFYDLLNVNYVEDSENMFRFDYSKNFLRWAMMAPGWKKQWHVGVRVSTGNKKLVAFIGAIPAAIRVDDDAMPMVEINYLCVHKKLRSKRLAPMLIKEVTRRVNLEGISMACYTAGVYLPTPVCSTRYFHRNLNCKKLIDIGFSYLPRGLTLQQLIRRHKLPENPTTKGMRPLEMKDVPLLSNYLQKFKLAPVFDEAEFAHWFLPKTEVVYCYVVEDPVTHEITDMISFYILNSTIINNTRYKTLNAAFSFYNVATSTTMENLLYDSLILAHKTGHDVYSCLDLLDNDVKVLDKLKFGMGDGHLQYYLFNYAMASIKPDQLGLVL
PF01233_PF02799	Ihou_IchthyosporeaIchthyophonida	VEINYLCVHKKLRSKRLAPMLIKEVTRRVNLEGISMACYTAGVYLPTPVCSTRYFHRNLNCKKLIDIGFSYLPRGLTLQQLIRRHKLPQNPTTKGMRPLEMKDVPSAHKLLSNYLQ
PF01233_PF02799	Cfra_IchthyosporeaIchthyophonida	DGEISSTTPVENGEEKVANEATKKKKKSSEVVVGEETTSVSGALPPGIDAETMLKIQQSLASLSVARERNIPTAPFNAEQARDRDYKFWKTQPVLQIGEDATPSCGPIESDKSDIRAEPLDLPAGYEWFATDIEDSKNLNDVYDLLNENYVEDGEAMFRFEYSKAFLRWALKPPGWKLQWHLCVRASKSKKVVGFISATPAHISVHTEPRKMVEINFLCVHKKLRSKRLAPVLIKEITRRVNMTGIFQAAYTAGVYLPTPVGTCRYWHRSLNPKKLVDVRFSHLPANMTMQRLRMLQAKDVPAVTTMLNKYLDQFLLHPIFTEDEITHWLTPQDDVVNAYVVEDPETGELTDLTSFYTLSSTVIGHPRYNTLRAAYSFYHVPNKTPLLQLMKDALILAQ…
PF01233_PF02799	Sarc_IchthyosporeaIchthyophonida	EEAQVRDFKFWKTQPVPQLGKRVVESAEKRETGPIEPNKEDGEIRQEPLNLPDGYEWYATDIDQPEELDAVYDLLNENYVEDGEAMFRFEYSKKFLRWALKPPGWLRSWHLCVRAQESKKVVGFISATPAHIQVHDKENKMVEINFLCVHKKLRAKRLAPVLIKEITRRVHLTGIFQAAFTAGVFLPTPVGSCRYWHRSLNPKKLVDVRFSHLPASMTMQRMIKHYKLPTATVTPGLRPMEARDVPAVTEMLNTYLNKFVLHPIFTEDEIAHWLIPKDEVVDAYVVEDPETKELTDLTSFYTLSSTVIGHPRHSTLKAAYSFYHVPNKTPLLQLMNDALTLAQGKKFDVFNALDLQENGKVLKELKFGIGDGTLQYYLYNYACPTIQSKEVGLVML
PF01233_PF02799	Cowc_Filasterea	EQAATQPSSLANLSQDQLAAMIQLLNLDGKGKAKEQDKEHKFWKTQPVLQYDQSSDAVEPIEPDNANIRQEPYPIPADFEWVTLDLLKEDQLSELYNLLNENYVEDDDNMFRFDYSREFLRWALLPPGWKPIWHAGVRASKSRKLVAFISAIPATLKVKDRVQPLVEINFLCVHKKLRTKRLAPVLIKEITRRVHLQGLFQAVYTAGVVLPKPFSTCRYWHRSLNPKKLIDIGFSHLGRNMTLARTIKRYKVAEQPTTAGLRLMKAADVPSAFRVLSTYLERFAIKTVYTEEEFVHWFLPRNNVISTYVVENSKHEITDLVCWYTLPSTIVNNPNYSNLKAAYSYYTVANTVPFEQLLSDALILAKNEEFDVFNALDLMQNAPVFENLKFGIGDGQLRY…
PF01233_PF02799	Dcos_ChoanoflagellataStephanoecidae	KKDYKFWKTQPVPGLEEKIEVEGPIEPDVPKEELRQEPLTLQKGFEWDTVDIEDPKQLDEVYTLLYENYVEDDDNMFRFDYSRDFLKWALQPPGWKKFWHPCVRASKNKKMLAFISAIPAHMRMMEKSQMLVEINFLCVHKKLRSHRLAPVLIREITRRANIEGIFQATYTAGILIPKPIAKCRYWHRSLNPRKLIDVKFSYLPRNMTMAKTVKKYMLPKETLTPGIREMTEDDVPKACALLVEYLQQFKIAPVFNEADFKHWLVPRKGVIYAYVVEDPETKEITGLTSFYKLPSTIVQKYEMPGYETLHAAYSYYNVPGKTSIKTLMKDALILAKREKFDVFNALDLMENSEYLQDLLFGVGDGNLHYYLYNYRMPEIKAGDVGLVL
PF01233_PF02799	Hnan_ChoanoflagellataAcanthoecidae	QAIIDRINALEQPPPPSDDPATKDFKFWKTQPVPQYGEADEEIAEGPLEANKPQSEIRQEPLALPAGFEWASLDITDPAMLDELYRLLNENYVEDDDNMFRFDYSRNFLKWALQPPGCKAVWYAAVRQSGGSRKLRGFISAIPATLRIGEKNQELVEINFLCVHKKLRSHRLAPVLIREITRRVNCEGLFQAVYTAGVVLPTPIAKCRYWHRSLDPKKLVDVRFSYLPRGSRMTELVRKLKVPKETVTPGLRKMVEADLQSAWQMTEEYLRKFKVAPTFTSIEEFKHWLLPRDGVVNSYVVEDPETHEVTDMVSFYTLPSTIVNHPVHKLLKAAYSFYNVPGKTEIVQLMNDALILAKNDKFDVFNALDLMENSKFLEKLQFGKGDGNLQYYLYNYRLK…
PF01233_PF02799	Sdes_IchthyosporeaDermocystida	KIQNLPRSVDSVKSAEDAIKKEFKFWKTQPVPQLEDTVIDFGPIEPANSNIQKHPYKIPDGFEWELVDVDNSTQLTELYTLLNENYVEDDDCSFRFDYSPQFLKWALKPPGFFKSWHLGVRVTNTKKLVAFISGIPATLAVDKASVIVAEINFLCVHKKLRSKRLAPVLIKEITRRVHLKGIFQAVYTAGVYLPRPLTTCRYWHRSLNPKKLIDIQFSVLQRNMTMARTIKLYKLPDHPTIPGSRPMLKEDIPQVYQLLQNSLARYSVHPNFHNEADISHWFMTRQDVIYSFVVVDSTTQKITDFFSFYILNSTVCNHPTHKTLYAAYSYYLASTKVP
PF01233_PF02799	Nk52_Ichthyosporea	GSVKSAEEAIASNKEYKFWETQPVPQLGGVVTDYGPIEPDNENIQQEPYNLPNGYEWCVIDIDKENELLELYTLLNKNYVEDDDNMFRFAYSPAFLKWALQPPGFIKDWHIGVRVSTSKKLVGFISGTPAHVRVGDSSVKMTEINFLCVLKKLRSKRLAPVLIKEVTRRVHLKGVFQALYTAGVYLPTPFTTCKYWHRNLNPKKLIDIGFSPMPRDRTMAQTIRKYRLPEETRVRGIRPMKKEDGLGVHKLLTTNLQKYRVSALFDSIEEVLHWFLPRDQVITSYVVEDTETGEITDFFSFYTLNSTICRHPEHNMLYAAYSFYNVSTKVAYEKLMKDALIVARSKGYDVFNSLDLMENSSILEELDFGVGDGDLHYYMYNYKCPSSTPGDIGVVL
PF01233_PF02799	Mbre_ChoanoflagellataCraspedida	GFVWSQLDLTDAAQLDELYVLLNENYVEDDDNMFRFDYSKDFLKWALMPPGWKPVWHLGIRSEKSNRLLAFISAIPADIRCKEHTQRMVEINFLCAHKKLRSKRVAPSLISEITRRVNREGIFQACYTAGAVIPRPVNSCQYFHRSLNPGKLLDIRFSGLKAREKRKDHIKKYTLPSEPTVSGLKPMEMKHTEQVKVMLNDYLARFDLAPVFSVEEVQHWLLTREDVVYSFVVEDDEGNVTDFLSFYNLPSTVMKHPEHNHLKAAYSYYNVATKHDLTELMRSALILAKERGFDVYNALQLMDNGSVFEALQFGPGDGKLNYYLYNYRLKAESSIGLVL
PF01233_PF02799	Sros_ChoanoflagellataCraspedida	EGPIEENKAEIPDEPVGIPAGFVWSTVDIQKEEELEEVYQLLYANYVEDDDNMFRFNYSKDFLKWALMPPGWKSVWHLGIRNVKKGNLLAFISAIPAKMSCKGKLVDMVEINFLCVHKKLRQKRVAPSLISEITRRVNKEGIFQAAYTAGTVIPRPISSCRKPMEKKHVPSAHKLLSTYLEKFKVAPKLSEEEFEHWLMPQERVINTFVIEDDAGNVTDMCSFYTLPSTIMRHETHKELKAAYSYYNVATTMSLTALFKDMLVLARNRNYDVFNALHLMENASVFEECKFGGGDGNLQYYLYNYRLYPVKEEEMGLVLL
PF01233_PF02799	Mvib_Filasterea	PPANETQAPTAEHKFWSKQPVPQGDKEVEIGPLEPNKKPSEIRQTSYALPKGFTWCTLDITQKEQLDELYTLLNQNYVEDDDNMFRFDYSREFLLWALTPPGFKSVWHAGVRVDTSGKMVAFISAIPATLRIHKTAQELVEINFLCVHKRLRSKRLAPVLIKEITRRVHCEGLFQACYTAGVKIPTPIAESRYYHRNLNPKKLASIQFAHKPSKLTMNEWIKRYRLDKNTSTPGLRKMELKDAQAVHTLLSAHQERFEVTPLFTVEEVEHWLVPRDNVINSFVVENPTTHDITDFISFYSLPSTIVNNREYSILSAAYSYYNVATSVPLEDLMRDALILANNLDYDVFNALDLMENDSFLTPLKFGRGDGLLRYYLYNFGCPLMNPSR
PF01233_PF02799	Rirr_FungiZyg	IREAIQPPPSASNSQKQKDMSSHKFWSTQPVPKHGETIEEDGPIESNTPYDQIRKEPYALPKEFEWVTLELNNENELNELYTLLTNNYVEDDDAMFRFDYSGDFLKWALQPPGYLKTWHVGVRVSSNKKLVAFVSGIPADIRIYDSHQHLVEINFLCVHKKLRSKRLAPVLIKEITRRSHLQGIFQAVYTAGVVLPKPISKARYYHRSLNPKKLVETNFSRLPQNMPLSRFIKKFKLPAETSTPGLRPMVEEDVPEVKTLLNEYMSKFNFVPVFKTDDEVKHWILTRDKVIWSFVVEDLETKKLTDFFSFYYLPSSVIGHQVHKTINAVYLFYYAVKEADEKAIKGRLQGLIKDALILAKLKNVDVFNCLDLLENKLFIEDLKFGAGDGYLNYYMYNWR…
PF01233_PF02799	Mver_FungiZyg	GSGSNNNKKTPNAALSAQRFEQELANAPPDLQDKLRALLQSMSLNGPPGAAAGSSGKEPKSMDEHKFWKTQPVVKHDEVVEEDGPIEADVPLDQVRATPYPLPKEFEWSLVNVEDDKEIKELYELLTQNYVEDDDAMFRFDYSAEFLKWALLPPGWKKAWHIGVRVASNKKLVAFISGIPQDVRVHSNVKRMVEINFLCVHKKLRSKRLAPVLIKEVTRRTHLEGIFQAVYTAGVVLPKPMATCRYFHRSLNPKKLVETGFSHLARNMTMARLVKLYKLSAQTSTPGLRPMEDKDVAVVSKLMNKYMSTCEIAPFFGEADVRHWLIPRAGVVWAYVVEDPETKEITDFFSFYSLPSTVINNPTHSTLNAAYSFYYAVKTDDEILDKIENAEERKAARDD…
PF01233_PF02799	Mcir_FungiZyg	DHQFWKTQPVPRYDENIAESGPVEPDTPYDQIRKEPIPLPKDFEFCEIDMEDDKQVKELYELLTMNYVEDDDAQFRFDYSAEFLKWALLPPNQKKSWLVGVRVASNKKLVAFISGVPVAMRTYDVVHKLTEINFLCVHKKLRSKRLAPVLIKEITRRSHLEGVFQATYTAGAVLPKPVSTCRYYHRSLNPKKLVECNFSRIPPKSTLSRMIKNYKVPEKTSTVGLRQMRPEDAPQVRVLLNKYLQRFDFAPVFETDEDVKHWLLPHDKVVWSYVVEDAEKKITDFFSFYSLPSSVIGNPKHSTLNAAYMFYYALQVDEELSDVQKDKFITKRLNELVSDALVLAKKADFDVVNTLDLMDNAKFVQEQKFGNGDGYLNYYLYNWKCPDVARHKVGLVM
PF01233_PF02799	Rory_FungiZyg	KKVDKLVKKTEKLKTNASASASSSNNNGDQVLMKQQLRQLMENMALMEQSGLIKASAKKDLGSHKFWSTQPVPNYDEDITESGPIEPDIPYDQIRKEPLPLPKEFEWCEIDMSQEKQVKELYELLTFNYVEDDEAQFRFDYSAEFLKWALQPPNWKQSWLVGVRVAANKKLVAFISGIPVALRTYEKIHHLTEINFLCVHKKLRSKRLAPVLIKEVTRRSHLENIFQAVYTAGAVLPKPVSTCRSLNPKKLVECNFSRIPARSTLSRMIKQYKVPDETNTPGLREMRLEDVGEVRELLNKYLSRFDLAPVFETDEDVKHWILPHEKVVWSYVVEDAQTKKITDVFSFYSLPSSVIGNPKHNTLNAAYMFYYAVDTTHCEDKEKENKYIRKRLNELVNDA…
PF01233_PF02799	Nspp_Discicristoidea	DIMRQMLAAMQTSQQTKAMQKTSENEKKDNHKFWSTQPVMDFDEDDNRNEAIEPDKKPEEIRQTPLPLPQGFEWAEIDVNNDAELKELYELLTFNYVEDEDAMFRFDYSAQFLRWALQPPGWLKSWHPGVRVTSTKKLVGFISAIPADVRIYDHHQKMVEINFLCVHKKLRTKRLAPVLIKEITRRVHQQNIFQAAYTAGIRLPRPVTTCRYYHRSLNPKKLIETGFSHLARNMTLSGTIKKYKLPETTQTPGLRPMQAEDVAAVTRLLATQLSLCSLAPIMTDAETAHYFLTRDDVVYSFVVEDPKTHEVSDFVSFYSLPSSVIKHPVHKRLNAAYLYYYATSKTPLKQLINDALILARDLEFDVFNCLNLMQNSTFVDELKFGVGDGALQFYLYNWAC
PF01233_PF02799	Awhi_IchthyosporeaIchthyophonida	SHEEAIKKEYKFWDTQPVVQLNEEVTEYAQIEPDKEDIQQTPYTVNANFEWVVIDVLDKNELEEVYHLLSYNYVEDEDCMFRFDYSPAFLLWALTPPGWKKQWHIGLRVKSSRKLVAFISAIPATVTVGTITEQHMVEINFLCVLRKIRDKRVAAVLIKEITRRVHLEGLFTAAYTAGIYLPTPYVSCRYWHRTLNAKKLIDVQFSFIPRNETLQDVINKHKLPKEPKTIGFKLMEERHLEEAHKLLTDYLDEKTEVHPVYTLEEFRHWFLGRDNVITSMVVEDPETGRVTDFASFYALNSSVINHPVHKDLRAAYSYYNVARKTPFNQLLKDVLITAVQLKFDVFNALDLMENEQMFEPLKFGKGDGCLQFYFYNIR
PF01233_PF02799	Pgem_IchthyosporeaIchthyophonida	KKKPKKKKQKKTXTKKKRKKKKKTTENDETLKSEKELEEERTAAELKKKMDQDRMLQLLAAMSAQAKSAAPNPNAKPTTLEAAREKEFKFWKTQPVVQIDEKVVGCGKIEPDRDNVPEEPMKVPEGFEWCTVDVNNSQELEDLHQLLNMNYVEDEDAMFRLKYSSEFLLWALTPPGWKRKWHLALRVKTTKKLVAFISAIPATLGVDHVEREPVVEINFLCVKRKIREKRVAAVMIKEITRRVHVEGLFVAAYTAGHYLPTPYSTARYWHRSIEIKKLVDIRFSYVPHNTTMADLIKKFKLPTETVTPGLRLMEEKDCEDAMKLLENYLSKNTRVHPVYDLEEFKHWFLHRDDVITCYVVEDPETKELTDLLSFYTLNSSIIRHPDYTDLKAAYCYYNI…
PF01233_PF02799	Clim_Corallochytrea	XDLVLCKESLVRKPKVMSEERDNGRPMAPDEAAFTDGLAEQMIKQMGLDDIGEEAQKMLAQMQAGGTLPEGTDKESMDQLRQMIAQYNEGQGKDATPDKEHKFWKTQPVPQFTDPEKGKAGIGAIEDDKAPDEIRQEPYKLPSQFVWDTVDITDEAQLTEVYDLLYGNYVEDDDAVFRFDYSRPFLKWALCPPGWEQLWHCGVRVQANKKLVAFISAIPADVHVVNQQKRMVEVNFLCVHKKLRTKRLAPVLIKEITRRVHIKGIFQAIYTGGIVIPRPVTRTTYWHRSLNFKKLVDTKFSYIPRNQTMQRMLKLYKLPKETHTTGLRQMTKEDVPEVQVLLRKYLSNKRLVPVMNEDEVAHWLLPRDDVVETYVVQNPDSKKLTDFISFYILNSSVLN…
PF01233_PF02799	Clii_Corallochytrea	DATPDKEHKFWKTQPVPQFTDPEKGKAGIGAIEDDKAPDEIRQEPYKLPSQFVWDTVDITDEAQLTEVYDLLYGNYVEDDDAVFRFDYSRPFLKWALCPPGWEQLWHCGVRVQANKKLVAFISAIPADVHVVNQQKRMVEVNFLCVHKKLRTKRLAPVLIKEITRRVHIKGIFQAIYTGGIVIPRPVTRTTYWHRSLNFKKLVDTKFSYIPRNQTMQRMLKLYKLPKETHTTGLRQMTKEDVPEVQVLLRKYLSNKRLVPVMNEDEVAHWLLPRDDVVETYVVQNPDSKKLTDFISFYILNSSVLNNDKHSNLKVAYCFYYAPFKHGLKDLLRDMLIVAKNEGCDVFNALDIMDNQAVFADLNFGKGDGNLQYYLYNFYCPEMKAQDCGFVL
PF01233_PF02799	Cneo_FungiDik	EEIRRALKAADLMKILDGKMALGNKSGTKNLGEHKFWKTQPVPQITGSGASAPMEEGPIDDPKTPADVKQEPGVLPAGFEWSTIDINDEEQSKEVYVLLCENYVEDDDAMFRFNYSREFLLWALTAPGYLPDWHIGVRVQKTKKLVAFISGIKIDIRVRAKTFPAAEINFLCVHKKLRSKRLAPVLIKEVTRRVNLTNIWQAIYTAGVILPTPIGTCRYFHRNLNPPKLVDIGFSPLPRGSTIARLVQQYSVPSHPRIPGFREMKKEDVPQVGALLRRYLDRFDVAQAFKDDDEVEHWFLSGQGKEVGGRRVEQVVWAYVVEDPTTHRITDLISFYALPSTIMKHPKHNLLNAAYMFYYATDVIFPPPSSSAHSDADVNAGESSVAAVGTGGEDAKTKK…
PF01233_PF02799	Rall_FungiCry	KEHKFWKTQPVMQEKITEEEYGPIQQNKSKEDIRKEPYIIPDTFVWKNIDLNDEQCLDNVYELLANNYVEDPDKVFRFNYQKELLKWAMSSPGAKEEYHVGVRVKATGKLVAFICAVPASIKINSKILEIVEINFLCVHKKLRDKRLAPVLIKEITRRANLNGIFQAVYTAGIVLPTPIVTCRYFHRSLNPKKLVETGFSYLAPNDNINRLITKLKLPSEPSLPGFRQMRIEDIPQVTIKLNSFLEKYKVSACFNEQEVKHWFLPVNNVVYSYVVQDPNSDEITSFISFYLIPTQVLQHPVHKNINIGYLFYYFYDNQINLHTLLKDALIMAKQNDFDVFNSLVLMDHNESLLHDLHFLPGDGYLNYYLFNYRTPALKNKDLGVVL
PF01233_PF02799	Spom_FungiDik	ENNKNTKNSQQDSSFSEGGIRELLDRLALRSLIEKEEAAAPPKTYEDFKFWKTQPVPKFDDECTQEGPIDPNTDINQVPREPYRLLKEFEWATIDVTNDNELSEVHELLTENYVEDATAMLRFAYISEFLRWALMPPGYVKEWHVGVRVKSSRKLVAFISAVPLSIRVRDKIIKKCAEVNFLCIHKKLRSKRLTPLLIKEVTRRCHLENVWQAVYTAGVLLPSPVSLSRYMHRSLNWKKLYDIGFAPFPLGSTEKKETAKYHLPPNTQTPGLRPMELKDVPAVQSLLSQYMERFELAHLFSEEEVRHWFLYTDKVSSGPVVWSYVVENPESKKITDFFSFYSLPSTVIGNPKYKDIQAAYLYYYASDSCPKDLSSESQLAFVERCKLIVNDALILAKKF…
PF01233_PF02799	Pbif_Breviatea	NPLSSEQKIQIETNLKNAEEVEADEILEAIYTDVKSMLINEKGEDKAFKHEFWDQEPVPKMDETPVGEKESHAIEHPKLEDIRKEPLSLPPMLEWVTCNIDDEAELKEIYTLLNLNYVEDEDEMFRFDYSPEFLLWALKPPNHRQEWHVGVRKSQTKELVAFISAIPGHIRIYGKEVTVVKINFLCVHKTLRDKKMAPLLIKEITRRVNLTGIWQAIYTAGIVLPRPVASCRYYHRTINTRKLVDVGFTYTTQTKTLHRLEKLNALPESTKIPGFRPLERRDCKQCCHLLKLQVSKNKLAIVYNEADFVHWMLPRDNVISSYVVQDPATQRITDFVSFYNLSSSVLGHEKHPHVKAAYCFYYAATGHPLKDLLQDAMVMAKSQGYDVFNALDLMDNATV…
PF01233_PF02799	Colp12	KTYKFWSTQPVPQLTEEKITECGPVEPNKTDVRQTPYNLPSGFEWSTLDINDEAQLQELYNLLYENYVEDDDNMFRFDYSAPFLRWALQPPGWKQVWHAGVRVSGNRKLVGFISAIPAHMQIYEHSQLLVEINFLCVHKKLRTKRLAPVLIQEITRRVHLEGIFQAVYTAGVYLPKPVASCRYWHRSLNPKKLIEVKFSHLGRNMTMQRTIKLYKLPASTQVSGIRTLTAADVPAARNLLMEYLKKKAKLYTVFSEEDFAHWFLPRDGIVNSYVVEDPETHAITDFVSFYTLPSSIMNHPEHKTLKAAYSFYNVATKTALNDLVNDALILARDDGFDVFNALDLMDNSSFLKELKFGMGDGNLQYYLYNYRCPDMPPSSVGLVL
PF01233_PF02799	Amac_FungiBla	VQRIAALSAGQEGAPKPPPEHKFWRTQPVPQTHEEQVAIEADGPLEPNKPRDQVRQTPLPLPAGFEWCEVDITDENELDQVYTLLFNNYVEDTEGNFRFGYPKDLLTWALKPPGWKKTWHVGVRVSASRKLVAFISGIPARMAVNKTELPMVEINFLCVLKKLRSKRLAPVLIKEITRRCNLEGIFQALYTAGTALPGSVGACRYWHRSLNVRKLVETGFSYVPIGKTFEQQERRLRVGSTPKLDGIREMTVRDVPQVKRGLEEYNARFGLHPHFSEEEIAHWMVPRKGVVHSYVVENKEGKITHFFSFYRIPSKVLNHPKHTELNAAYSFYYFYPEGKTAIETSNNLVELFTDGLHFADKTGHDVFNCLELMENSEVLDACKFARGDGVLHYYLYNWR…
PF01233_PF02799	Cang_FungiBla	TPKQHKFWSTQPVPQSPDDRDKDGPLEPNREPEAVRQTPYNLPAGFEWVEVDVNKEEELEEVYKLLLENYVEDQEAQFRFGYPKELLSWALKPPGWKMNWHIGVRVSTTRRLVAFISGVPASISVNKTALPMVEINFLCVLKKLRSKRMAPVLIKEITRRCNLEGIFQALYTAGVELPGAVSKSRYYHRSINYPKLVDVGFSAPPQNMTLDERVKQLALSPDLVPGIRPMTSADVPAVTAGLSAFFSRFNLHPNFSEDEVEHWFVPKDNVVYSYVAASGVSGDSDEIDCFVSFYRIPSKVLNHPTHKEINAAYAFYYFYPYQEDAAAKNKRMLTRLMNSALVFAKQTDHDVFNCLALMDNPSVLKELQFGKGDGVLHYYLYNWRCKEMDGREVASVL
PF01233_PF02799	Crev_FungiZyg	HEFWNTQPVPKSTEVVKKDGPLHPPLSPEQIPKEPFALPSDQMEWCVVDVEKEEEMKELYLLLTENYVEDADSIFRFNYSAEFLSWALKSPGFQKNWHVGVRDVSSKQLIAFISGIPMEMMVRDKTMTMAEINFLCLHKSLRGQRMTPLLIKEVTRRIHQQGIFQAVYTVGRLLPKPVATCRYFHRSLNPKKLMETGFSQKLDALQLSKLNNMLRLPSKTSTPGLRLMRKGDVGQVRKLLNRFLKNRYEMMPVFRTDAEISHWFMPRDKVIWTYVVDDQEHPGKISDFFSFYSLASTALXXKHKSIDAAYLFYYGTRTDYNVVLTDEEKKACDSVKKEKALLKKKTDELIKQRLVEIIGDALVLAKEADFDVVNCVDMMDNSLFTQDLKFGPGDGYLRY…
PF01233_PF02799	Ccor_FungiZyg	EKLRQFLELLNLQAQQNRDNQQQIPAEHKFWKTQPVPQGGNKEVKPGTIEDNKPENLIRKEPYPLPSEFEWCLINVDDEAELKDLYELLNLNYGEDHDEMFRFDYSPEFLRWALQPPGWKEQWHVGIRVAASKKLVAFISAIPMTIFAVDKTMPMVEINFLCVHKKLRNKRFSPVLIKEITRRVHLTGIFQAVYTAGITIPTPIATCPYHHRPLNFPKLIDIKFSYIPNGSTKEQEIEKYKLPDTPTLALRPMEEKDIEQVHDLFNEFTSQFKLGPVFDSKETTRHWHMPLDKVNYSFVVEDENGKIQDFISFYQLNSSVLFHEEHKTLNIAYLNYYCTRRFNATKGPEGQSEEEKVQYKAHITELIKNLLIVANKEKFDVFNCVENLHAAEFLKDLEF…
PF01233_PF02799	Falb_Discicristoidea	SAFGPIEADKTPEEIRPEPYKLPAGFQWSDVDMSNDEQSKELYELLSGNYVEDGDAYFRFDYSREFLQWALQPPGFVPEWLVGIRLINTGRLVAFISGVPMSIRTNRDPSTHRMPAINFLCIHKKLRSKRLAPVLIKEITRRVHQTGIFQAIYTAGVRIPRPVSSVSYYHRPLNYQKLMDVGFVHPGTQLLSSILRQYRLPKTVALPHFRPMRPEDVPQVTALWADASATRYNLTAEFTEEEVAHSLIPRDKLVYTYVVEAPPATAGGAPGPITDMVSFYSLPSLCLGHPVHRTLNAAYLYYYVSTATPVADLVRGALIEASNAGFDVFNCLDIMTNSEFFSQLDFGVGDGTLNFYLYNWAMPTVPGGKVSVVL
PF01233_PF02799	Umay_FungiDik	ASSSIAPPSPSLTTAPVKEQEQDDDDDQENDDEEEEEEGTAAITGADGLTAKQRKKKKSKAAAKLRKKLGLGGSPTDASEGKLLASGSSREGKISDEVVSQVQRAVQAEHGSVAANAVTKANLAKVMAMMNLERDAMLKSQDSKQKAQKAIADHKFWKTQPVMKPTDAPVVKSDQEGSIEASVPPEQVRQEPYPLPADFEWVMIDVDNEGELKEVYDLLSANYVEDDDATFRFDYSPEFLHWVLKHPGYQKTWHIGVRVASTKKLVAFISGIPHELRVREKSYQSTEINFLCVHKKLRSKRLAPVLIKEVTRQCHLTGVFHAIYTVGSVLPTPVSCSRYYHRTINAKKLAEIGFSAIPHNMSMEAHVKRFELPAKTNLPGLREMERRDVAQVGKLMRRY…
PF01233_PF02799	Pisp_FungiNeo	QSLQSFINQLSLQEAAKAESEKPEFKFWKTQPVPALDEEVKEDGPIEADTPYDQIQKEEYPLPASFTWCNVNIDDEKELNELYTLLTENYVEDDDALFRFDYSSEFLKCEQYLVEINFLCVHKKLRSKRLAPVLIKEVTRRIHLQGIFQALYTAGVHLPKPISVCRYKGFDVFNCLNLMDNDDVLDDLKFGKGDGLLNYYLYNYRCVEVKPKKLGVVL
PF01251	Acas_Amoebozoa	MYTARRKIQKEKNAEPTEFELQVAQALFDLEVNATDLKGDLKELFISGARQVDLGAGKTAILVFVPFRLLKGFHKVQARLVRELEKKFSGQHVVVIANRRILPVIGKKNRRKRQKRPMSRTLTAVHDAILEDLVYPTEITGKRIRIRLDGSRLYKVYLDKKDQNNVEYKLDTFSRLYKKLTGKQVAFLF
PF01251	Mver_FungiZyg	FSTNMASHKIAKNGPADEIELSVAQALFDLENNVNDLKKELKPLQISSAKEVETGNGKKAIVIFVPVPQLKAFHKIQGRLTRELEKKFSDRHVVFVAQRRIMAKPTRTSRAKQMRPRSRTLTSVHEKLLEDLVYPTEITGKRTRVQTDQKRIIKVFLDAKDSTSLEYKLDTFVAVYRRLTGKEVVFEFP
PF01251	Rirr_FungiZyg	KIAKRQGVIYTETANSIAQALYDLENNVPELKKDLKPLQISDAKEYELGGGKKAIAIFVPVPLLKQFHKVQQRLTRELEKKFSDRHIVFIAQRNIMRKPGRKSRAKQARPRSRTLTSVHEKFLEDLVYPTEIVGKRTRVKVDGSKIIKVYLDSKDATSLEYKLDTFKSVYKYLTSKDVEFQF
PF01251	Mcir_FungiZyg	ASNKIVKQTGAPAADEFELSVAQALVDLESSVPDLKGLKALQISAAKEVELGAGKKAIVIFVPVPSQAGFHKVQARLTRELEKKFSDRHVVFVAQRRILAVPGRRNNGKQPRPRSRTLTAVHDAILDDLVYPTEIVGKRLRQKVDGSKTLKVFLDAKDATSLEYKIDTFSAVYKKLTGKDVVFEFP
PF01251	Rory_FungiZyg	ASKIVKPAGAQPDELELSVAQALLDLESSVADLKKELRPLQISAAKEVELGAGKKAIVIFVPVPSQRAFQKIQARLTRELEKKFSDRHVVFVAQRRILPVPTRRTNGKQPRPRSRTLTAVHSAILDDMVYPTEIVGKRLRQKVDGSKTLKVFLDSKDATSLEYKLDTFSAVYKKLTGKDVVFEFP
PF01251	Ccor_FungiZyg	MSAEQKIIKVEGVQPTELELSVAQALFDLENNVADLKKELRALQISSAKEVEIGSGKKAIVVFVPVPLLKQFHKVQVRLTRELEKKFSDRHVVFIAQRRILPRPTRKVHLKQSRPRSRTLTAVHDAILEDLAYPTEIIGKRIKYKVDGSRLIKVFLDTKDTTSQEHKLDTFRAVYKKLTGKDAVFEFP
PF01251	Amac_FungiBla	SARSKIIKPAGVQPDETELAVAQAIFDLENNVVELKGDLRAVQISAAKEIETGKGRKAIVIFVPVPQLKQFHKVQQRLVRELEKKFSDRHVMIVAQRRIMPRPTRHTRQKQMRPRSRTLTAVHEAILEDLVYPTEIVGKRTKIRVDGSKSTKVFLDKKDATYLEYKLDTFSAVYKKLTGKDVHFEFPQYQ
PF01251	Cang_FungiBla	MSAANKIIKAAGVKADELEMQVAQAIFDLENNVAELKADLRAVQISAAKEVDVGKGRKAIVIFVPVPQLKQFHKIQQRLVRELEKKFSDRHVLVVAQRRVMPRPTRHSRQKQQRPRSRTLTAVHEAILDDLVYPTEIVGKRTKLRVDGSKTTKVFLDKKDATYLEYKLDTFSAVYKKLTGKDVHFEFPQYQ
PF01251	Bden_FungiChy	SARSKILKPTGVQPDELELQVAQNLFDLEHNVAELSADLRGLQFTAAKEIDIGRGRKAIVIFVPVPQIKQFHKVQTRLVRELEKKFSDFHVLLIAQRRILRKPDHKTRLTQQRPRSRTLTAVHEKILEDLVYPTEIVGKRTKVRIDGSKLIKVFLDRKDHTSLEYKLDTFYAIYKKLTGKDVVFVFP
PF01251	Spun_FungiChy	SARSKIAKPAGQEPDELELQVAQNIYELEQNVAELKEDLRGLQFVSAKEVDVSHGKKAIIIFVPVPLLKQYHKVQSRLVRELEKKFSDRHVLLVAQRRILRKPTRRARVHQPRPRSRTLTSVHEKLLEDLVYPTEIVGKRTKVRVDGSKLIKVFLDRKDHTALEYKLDTFSSAYKRLTGKEVDFEFP
PF01251	Pisp_FungiNeo	KIIKPVGQEPDALELEIAQYLADMEKNVSELKADLRGLQFTAAKEVEVGRGKKAIVIFVPVPLLKQFHKVQTRIVRELEKKFSDRHVLLVAQRRIMQKPHKNSRVKQARPRSRTLTAVHESLLDDLVFPTEIVGKRTKVRVDGSRVMKVFLDRKDSTSLEYKLDTFSAVYKRLTGKEVNFEFP
PF01251	Gpro_FungiChy	MSSARSKIVKPAGVEPDELELEVARNVYELEQNVPDLRADLRVLQIVAAKELDIGHNKRAVLIFVPVPLLKSLRRVQPRLVRELEKKLSDRHVVFVAQRRILRKPTRTSRVGQKRPRSRTLTSVHEKLLEDMCFPTEIVGKRTKVKVDGSRVTKVYLDRKDHTSLEYKLDTFSSVYRRLTGKDVVFEFP
PF01251	Rall_FungiCry	MASALTKIIKPVGEQPDALEVKIAEALIDLENSSDEIRKELRPVQITSAKEIELGHGRKAIAVFVPVPLIKQVHKVQSRVVRELEKKFSDRHVIIIAQRRILPRETRKSRSKQPRPRNRTLAAVHDAILDDLVYPAEIIGKRLRVKVDGSRQIKVFLDRKDMESVEYKVDTFSSVYKKLTGKEVVFDFPAAQM
PF01251	Clim_Corallochytrea	DEFENTVATALQELEDSSAEMKADLRGLYISAAKEVDVGQGKKAVVLFVPVPLLRNFHKVQVRLVRELEKKFSGRHVVIVAQRRILRKPARNARQPKQPRPRSRTLTAVHDSILDDLAYPTEIVGKRIRIKLDGSKLYKVHLDKKEKNNVEYKLDTFGSVYKALTGKDVVFEFPSQ
PF01251	Clii_Corallochytrea	KLIKPAGQQADEFENTVATALQELEDSSAEMKADLRGLYISAAKEVDVGQGKKAVVLFVPVPLLRNFHKVQVRLVRELEKKFSGRHVVIVAQRRILRKPARNARQPKQPRPRSRTLTAVHDSILDDLAYPTEIVGKRIRIKLDGSKLYKVHLDKKEKNNVEYKLDTFGSVYKALTGKDVVFEFP
PF01251	Apar_IchthyosporeaIchthyophonida	ASTKIIKPNGQTPDEFEQSIAQALVDLENNAAELKADLAPLYISSAREVDVGGGRKAIVVFVPVPLLRQFQKIQARLVRELEKKFSGKHVVFIAQRRILRKETRHTRAKQPRPRSRTLTAVHDAILEDVCYPTEIVGKRLRFKLDGSRVIKVHLDSKDKANIEYKTDTFRSVYRQLTGKDVTFEFP
PF01251	Ihof_IchthyosporeaIchthyophonida	ASAKIVKPNGQVPDEFELSIAQAFADLENNAAELKADLAPLYISSAREVEIGAGRKAIVVFVPVPLLRSFQKIQARLVRELEKKFSGKHVVFIAQRRILKRETRKTRVSQPRPRSRTLTAVHDSILEDVCYPTEIVGKRLRFKLDGSRVLKVHLDSKDKANIEYKTETFRSVYRQLTGKDVVFEFP
PF01251	Ihou_IchthyosporeaIchthyophonida	QAFADLENNAAELKADLAPLYISSAREVEIGAGRKAIVVFVPVPLLRSFQKIQARLVRELEKKFSGKHVVFIAQRRILKRETRKTRVSQPRPRSRTLTAVHDSILEDVCYPTEIVGKRLRFKLDGSRVLKVHLDSKDKANIEYKTETFRSVYRQLTGKDVVFEFP
PF01251	Cfra_IchthyosporeaIchthyophonida	MASKIVKPANQEADDFEKSIAAALVDLEANVQELKTDLREVYITSAKEVDISSGKKAIVVFVPPPLLQAMHRVQVRVVRELEKKFSGKHVIVLAQRRILKKETRKTRCTQPRPRSRTLTHVHDAILEDLVYPTEIVGKRTRVKTDGSKIVKVHLDMKDQKEVEYKLDTFSSVYKRLTGKD
PF01251	Sarc_IchthyosporeaIchthyophonida	FTMTSKIVKPAHQEADDFEKSIAAALVDLEANVQELKVDLREVYITSAKEVDVGAGKKAIVVFVPPPLLQAMHRVQVRVVRELEKKFSGKHVIVLAQRRILKKETRKTRCTQPRPRSRTLTHVHDAILEDLVYPTEIVGKRTRVKTDGSKIVKVHLDMKDQKEVEYKLDTFSSVYKRLTGKDVTFEF
PF01251	Sdes_IchthyosporeaDermocystida	MFAARRKILKPAGQKPDEFEGLIAQALLDLESSSNELKADLRELYITAAKEVDVGDGRRSIVIFVPVPLLKQFHKIQVRLVLELEKKFSGKHVIIVAQRRILKKQTRK
PF01251	Nk52_Ichthyosporea	MVTASRKIVKPAGQKPDEFEGLIAQALMDLETSSNELKADLRELYITSAKEVDIGDGKRAIVIFVPVPLLKQFHKIQVRLVLEMEKKFSGKHVIFVAQRRILKKESRKTRVKQPNPRSRTLTAVHESILEDLVYPTEIVGKRTRVKTDGSKLIKVHLDKKDQNNLEYKLDTFSAIYKKLTGKDVAFEFP
PF01251	Colp12	KIHKANGQALDEVEEQVAQAIFDLESNANELKAELRGLYITAAKEVDVGAGKKAIVIFVPVPLLKSFHKTQSRLVRELEKKFSGKHVVIVAQRRILAKEQRSSRAHKQPRPRSRTLTAVHDAILEDLVFPSEITGKRTRVKLDGSKVIKAHLDKKDQNNLEYKLETFSSVYKKLTGKDVVFEFP
PF01251	Nspp_Discicristoidea	SKIVKPKGAAEPDEFESTVASALTDLENNTAELKAELRPLHITAAKEIDTGSGKRAIILFVPVPQLKAFQKIAARLIRELEKKFSGKHVVIVAQRRIQKPASRTRRLKQPRPRSRTLTAVHEAILEDLVHPTEIVGKRTRVKVDSSKLTKVFLDKKDQNNLEYKLDTFSAVYKALTGKDVNFEF
PF01251	Umay_FungiDik	QKIFRTANAPTGPADEVETVVAQALIDLESNVSELKAELRPLQISCAKEIEVKGGKKAIVVFVPMPQLKAFHKIQQRLTRELEKKFSDRHVVFVGQRRILGKPSRKNRNQQPRPHSRTLTAVHESILEDLVYPSEITGKRTRVATDGSRLIKCYLDSKDATSLEYKLDSFSSVYKKLTGRDVSFMFSSDN
PF01251	Spom_FungiDik	SALNKIVKRSSSQPTETDLLVAQCLYDLESSSKDMAKELRPLQITSAREVEVGGGKKAIVVFVPQPLLKAFHKCQARLTRELEKKFADRHVIFIAQRRILPKPGRKSRVTQKRPRSRTLTAVHNAILEDIVFPTEIIGKRTRQATDGRKTIKVFLDNRDANTVDYKLGSFSSVYHKLTGKNVTFEFPVATG
PF01251	Crev_FungiZyg	TTHILKRDSALPTETELLVDRALQDLESHSPELKKDLRPIQITAVKEVEVTAGRKALVIFVPVPLLKAVHKVQQRVIRELEKKFSDRQVIFIAQRRILKKPPRVNRAKQPRPMSRTQAVVHDKILDDLVYPTEIVGKRTRVKVDGSRTIKVFLDSKDATSLEYKLDTFSAVYRRLTGKDVVFEFP
PF01251	Awhi_IchthyosporeaIchthyophonida	DEFEQSIETAILDLQNSAEEEFVKALKPLYISSAKEVDVGQGRKAIVLFVPVPLLTKFHAIQKRLVRELEKKYSGKHVIVVAQRRILRNEARESRVKQPRPRSRTLTAVHDNILEDVVYPSEIHGKRIRFRLDGSRLTKVLFDKKEEKNIEHKVETFSAVYKKLTGKAVVFEFTASA
PF01251	Pgem_IchthyosporeaIchthyophonida	MAARRKIVKPEGVELNEFEQSVEQALLDLQNSSEEEFAKALKPLYLSSAKEVEVGQGRKAIVLFVPVPILRQFHTIQKRLVRELEKKFSGKHVIIVAQRRILRAESRESRVKQPRPRSRTLSAVHENILEDVVFPTEIHGKRIRFRLDGSRLTKVLFDSKDEKNIEHKLDTFTAVYKQLTGKTVVFEFPTTA
PF01251	Adig_Metazoa	TTKIVKPQDAGEPDEFEKTISQALLELEVNSSDLKVSLRELYLTGAKEVDVAGKKAIVLFVPVPQLRAYQKIQTRLVRELEKKFSGKHVVIVARRRIIPKPSRHTRNDKQKRPRSRTLTSVHDAILEDLVFPSEIVGKRIRIKLDGSKLIKVHLDKQQQT
PF01251	Nvec_Metazoa	MFTASAKIVKPQGETANEFEQGISQAILELEMNSDMKAQLRELYISSAKEIDVGGKKAIIIFVPVPQIRAFQKIQTRLVRELEKKFSGKHVVIVAQRRILPRPTRKSRNQKQKRPRSRTLTAVHDSILEDLCFPSEIVGKRIRIKQDGSRVIKVHLDKTQQTTIDHKLETFSTVYKKLTGKDVVFEFPAY
PF01251	Bflo_Metazoa	MFSASAKIIKPAGEKPDEFEASISQALLELEMNSDLKAQLRELNITAAKEVEVGSSRKAIIIFVPVPQLKAFQKVQVRLVRELEKKFSGKHVVFIAQRRILPKPTRKTRTKNKQKRPRSRTLTSVHDNILEDLVFPSEIVGKRIRIKLDGARFTKVHLDKAQQNNVEHKVETYSAVYKKLTGKDVTFEFPEYQL
PF01251	Xtro_Metazoa	MFSTSAKIVKPNGEKPDEFESGISQALLELEMNSDLKAQLRELNITAAKEIEVGGGRKAIIIFVPVPQLKSFQKIQVRLVRELEKKFSGKHVVFIAQRRILPKPTRKSRTKNKQKRPRSRTLTAVHDAILEDLVYPSEIVGKRIRVKLDGSRLIKVHLDKAQQNNVEHKVETFSGVYKKLTGKDVVFEFPEFQL
PF01251	Skow_Metazoa	MFTTSAKIVKPAGEKPDDFELQVSQALLELEMNSDLKQQLRELWITASKEIDVGASKKAIIIFVPVPQQKAFQKIQTRLVRELEKKFSGKHVVFIAQRRILPKPTRKTRIKNKQKRPRSRTLTSVHDCILEDLVYPSEIVGKRIRVKLDGSRMIKVHLDKIQQTNVEHKTDTFSAVYKKLTGKDVVFEFPEHQL
PF01251	Dpul_Metazoa	SASKIIKPAGEKADEFENSIAHALLDLELNSDLKAQLRELHINAAKEVDVGGKKAVIIFVPVPQLRSFQKIQTRLVRELEKKFSGKHVVFIAQRRILPKPTRKTKLRIKQKRPFSRTLTSVHDSILEDLVFPAEIVGKRIRIRLDATRLIKVHLDKNQQTNIEHKVETFAAIYKRLTGKEVTFEFPEAYL
PF01251	Ctel_Metazoa	MYSASVKIVKPRDEKPDELESQVSQALLELEMNSDLKAQLRELHITGAKEVDVADKKAIMIFVPVPQLRAYQKIQARLVRELEKKFSGKYVVFIAQRRILAKPTRKMVRTKSKQKRPRSRTLTTVHENILDDLVFPAEIVGKRIRIKLDGSRLIKVHLDKTQQTNIEHKLDTFTAVYKKLTGKSVTFEFPEFVL
PF01251	Ocar_Metazoa	SGTVKIVKPRGEAASEFEKEISQAILELESSTDLKAQLRELFITGAKEYEFQGKRAIVVFVPVPQLRAFQRIQSRLVRELEKKFSGRHVVFLAQRRILRKPTRKSREKQPRPRSRTLTAVHDSILEDLVFPSEVVGKRTRIRLDGSRLIKVHLDKNQQTNLEHKLDTFSSVYKKLTGKEVTFEFPLYE
PF01251	Hmag_Metazoa	KIVKPGGEQPDELEKLIAETLMELEVNSDLKNELRELFISGAKEIDIGDKRKCIIIFVPVPLLTRFQKIQVRLVRELEKKFSGKHVIVVGQRRILPKPSRKTRNQKQMRPRSRTLTAVHDAILEDLCFPSEIVGKSIRVKLDGSRLIKIVLEKAQQTNVEHKLDTFANVYKKLTGKDTHFTF
PF01251	Tadh_Metazoa	MLSAAAKILKPNNEQPDEFEQSVAQAILELELNSDLKNQLRELQISAAKEIDVLNKKAIIISVPFPQLRSFQVIQPRLVRELEKKFSGSSVVIVAQRRILKKPTRKQRKSKQPRPRSRTLTAVHDSILEDLVFPSEIIGKRTLVRIDGSRLIKVYLEEKERQNLEHKKEAFVAAYKRLTGKDVHFEF
PF01251	Cowc_Filasterea	ATKKIVKPVGQEPSELELAVAQAIADLEHNSAEKDLKAELHELHISAVKEVDVGSGKKAIIVFVPVALIKGFRRIQPRLVRELEKKFSGSHIVFVAQRRILRKPTRNNKFGQTQPRPRNRTLTAVHEAILDDLVFPTEITGKRTRVKLDGSRLIKVHLEKKEQSNLEHKIDTFSAVYKKLTGKDVVFEFP
PF01251	Lgig_Metazoa	MYNFRSKIRKPNGERPSDIEYSLIQALFELETNSDLKLQLRELHIVSAREVEIAGKKAIVIFVPYILLRNFQKIQTRLVRELEKKYSGKHVVFVAQRKILAQPKRNCKQKNRGKRSRLRTLTKVHEDLLDDICYPAEIVGKRIRIKLDGSRLIKVHLDKTQQTNIEHKVDTFSAVYKTLTGKDVKFEFPENML
PF01251	Aque_Metazoa	YRPGVKIVKRGGKPLDKFEESIQQAILDIESSSDMKATLREVYFTGAKEVDAAGKKAICIYLPVPLQKTFQKVQVRTVRELEKKFSGRPIVFIAQRRILPKEKRNQRSKQKQPRPRSRTLTAVHNALLDDVVYPAEVVGKRTRIRMDGSQLIKVHLDKTQQTNLEHKLDVFSAIYKRLTGKTVNFEFP
PF01251	Cneo_FungiDik	SKVLRSANAPQTAPSEIEQQIAQALLDLEANVPELKSELRQLAFSSAKEVDVKGGKKAVVIFVPVPMVKAFHKVQQRLTRELEKKLSDKFIVFLSQRRVLPKQSRSSASAQKQKRPRSRTLTAVHEKILEELVFPSEIVGKRTRVAQDGSKLIRVYLDSKDQNNLEYKLDTFSSVYRNLAGKDVVFEFPVVAQ
PF01251	Mlei_Metazoa	LFSHTAKLLKPGGEASNDVEQSVSQALLDLEANSDLSSALRGLYFVGAEEVVIRDDKVAVVIHIPFPQQKIYHKIQGRLVRELEKKLSGKHVIFLAKRRILSKPTRHSRNLSKQKRPRSRTLTAVHESILDDLVYPAEICGKRKRVKLDGSQQIKVHLEKSAQINTETKLDTFMAVYKKLTGKDVVFEY
PF01251	Mber_Apusozoa	FTARSKIVKEKDQAPDELEMRVAQALFDLEVNAAELKADLRELHIVAAKQMEVGVDGKQAIVIFVPFPLLKAFHRIHTRLVRELEKKFSPMHVVIIAQRRILRKPKRRLDGKPIVRPRSRTLTKVHDAILEDIVYPAEIIGKRTRVRMDGKAIKVMLGVKEQTNTEYKLDTFSVVYKKLTGKDVTFQFP
PF01251	Mvib_Filasterea	LSAQQKIIKANDAPVDALELEVATALFDLENNGGDDLKASLREMHITGAKEVTVSEERKAIVIFVPVPMMHHCHRVQTRLIRELEKKFSGKHVVILAQRRMLRKPSRLDDRHQKQPRPRTRTLTAVHEAILEDLVFPSEIVAKRTRVKHDGGKLIKVSLDQKDKNILDQKTETFSAVYRSLTGKDIHFSFP
PF01251	Pbif_Breviatea	MFPAARKINKPNGEVDALEQEVAQALFDLEMNNDELKSVLSPLYIVGAKEVKVKDGKKAIVVFVPPPLLAKFRALHSKLVRELEKKFSGEHVIFLAQRRIMRKPSRKNRAGKQIRPYTRTLTSVHEKMLEDLVFPTEITGRRVRCKVDGSKSYICHLDSAEKANSEYKVDTFRAVYNQLTGKDISFEYP
PF01251	Falb_Discicristoidea	MSTASKIVKANGAKPTEFEDQLALHLTGIEGKVPELAAELKSLHFTAAEEVDAGSNKRAIVIRVPVPQLKRFQSISSNLTRELEKKFAGKHVVMIANRRILPKASRKLSHKQPRPHSRTLTAVHDAILNDIVYPAEISGKRLQYKTNGKRLLKVFLDTTEATQLDHKLETFSAVYKKITGKDVVFEF
PF01251	Dcos_ChoanoflagellataStephanoecidae	MYSVMSKIKKPKGAPADALEESVAQALYDLQVNSDKLKAPLKEVHITAAKEIDVGGGKQAIVVFVPVPQLSLFQKMIKERALIDELEKKFAGQSIIIIAERRIIRRESRNTRQLRQQRPRKYTLTAVHESILDDLVFPTEILGKRTRVRSDLTKLLKVHLHQESKPHGDRLDTYTKVYKNLTGKDVVFEFP
PF01251	Mbre_ChoanoflagellataCraspedida	PDSLEESVATALYELQVSSEKLKASLREVQICAAKEVDIGEGQRAVLVFVPVPQLPLYKKMIKERSLIDELEKKFANKQVVIMAERKIVRKESRNTRQLKQQRPRSRTLTAVHEAILDDLVYPHEITGKRIRFRPDGSRLHKVHLHKDSNTSQERLDTFVKVYKTLTGKDVVFEF
PF01251	Hnan_ChoanoflagellataAcanthoecidae	MFTSMSKIKKARGAQPDELEESVAQALYELQTNSEKLKGPLRELHISSAKEVDVTEGKSCVCIFVPVPMLPGFQKLIKENALIEELQKKFSGKTVIVLAERRILRKESRKGRGHSQQRPRSRTLTAVHEAILDDLVYPTEIVGKRTRVRLDGSKLLKVHLNPEAHARAGEKTPVYARVYKTLTGKDIAFEFP
PF01251	Sros_ChoanoflagellataCraspedida	LTARHKIKKSRGKDNKKEPTRLEHDVAKALYELQLNSEKLKESVRELVICAAKEIDITADKKAILIFVPVPQLAKYQKLIKERSLIEELEKKFSGKSVFIIAQRRIIRKETRNTVALKQKRPRSRTLTAVHEAILDDIVFPNEITGKRIRYRHDGSRLLRVFLHQEIHDSDKIATYSTVYNKLTGKNVVFEVQRN
PF01251	Ppol_Amoebozoa	MFTARKKLQKKEGEQVSELETQVAQALVELEAGSAELKNELRDLQITSAREVELKDKKGAIVLFVPYNQRIQFRRIQARLTRELEKKFNGKPVVLIIQRRIIRKPPAGSRKAMLHRPVSRSVTAVHKAILEDLVYPSEVVGKRIRYRVDGSSVLKIHLDPKDKQNVEHKLDTFATVYKKITGKTAVFEFP
PF01251	Ddis_Amoebozoa	MLNKKIIKPAGKVATEFENTVAQALVDLENNNAELKDLKDLSVCSVKEVDVAESKKAVVIFVPFRQLKNYNKIQQKLTYEVEKKLGGKQVMFIAQRRIIRKPASNNKIKMQKRPISRTIKAVHDAILDDLVFPNTIVGRRLRYRLDGSKLHKIYLDRKEMLSNISKVDSFSAVYHKLTGKEVVFEFTQQTA
PF01251	Ppal_Amoebozoa	MLTTKKKIVKPAGKEPTETENTIAQALLDLEQNDFKDLKDLQIVSAKEYDVSEGKKAIVIFVPFRQLKAYHKIQQKLVWELEKKLGGKTVMFIAQRRIIHKVSSTNKVKQQKVPISRTIKAVHDAMLDDLVFPTNIVGRRLRYRLDGTKLHKVYLDRKEMTVTEHKLDSFSAVYHKLTGKDVVFEFP
PF01251	Ttra_Apusozoa	MFTAQSKLKLAKDATPSELELELAKNLFELEMKDEDLQVELREVQIIAARKHVIDEETGKAAIIMFVPVPQLKHVQRIHQHLVRELEKRFSGQHILIVAQRRILPIPRRAPGGVRVFRPRSRALTTVHQAILEDILFPAVIVDRRTRVTIDGKKVRVLLEKQHETLIGYKLKTFSAVYQRLTGQVVSFEF
PF01257	Acas_Amoebozoa	RTLHSSVPRQGDHGGLSQHRDTPDNTIDTPFDFTEANTVEIKKILAKYPVNYKQAATIPLLHLAQYQTGGWVPLAAMNKIAKILEIPPMKVYEVATFYTMFNRTKVGKYHVQLCTTTPCQLGGCGSTVILETIKKHLNIGVGETTADGLFTLTEVECLGACVNAPMLQIGDDYFEDLTPESTVALLETLKAGKTPKVGPQTGGRKNCEGPQGKTTLFAAPAGP
PF01257	Ddis_Amoebozoa	ALSRHVETEDNNEHTPFDFTQENLVKVEKILAKYPKQYRQSALIPLLDLAQRQNGGWISLRAMDKVAHICGIAPMTAYEVASFYTMFNRTKIGENFVQVCTTTPCMLRGSGEIIKTCKSHLGIQVGETTPDNKFTLVEVECLGACVNAPMMCINDDFYEDLTSASTINLLDQIKNNKPTKIGPQTHRKAAEGPQGKTTLLEPPVGP
PF01257	Ppal_Amoebozoa	HIETEENNDHTPFDFNEENMVKVEKILSKYPPAYRQSAMIPLLDLAQRQNGGWISLRAMDKVAEIIGVPPMEAYEVASFYTMFNRTKIGKNFVQVCTTTPCMLRGSTAILDACKHHLKIGVGETTKDDVFTLAEVECLGACVNAPMICINDDFYEDLTPDSMKNLLNQIQNGKETKIGPQTHRKAAEGPQGKTTLLEQPSGP
PF01257	Ppol_Amoebozoa	QHYDTPDNTDRTPFDFTEENAKLAKKIISKYPYQQSAAIPLLDLAQRQCGGWLPLAAMQKIAKILEVSDMAIYETASFYSMFNRTKIGKNFVQVCTTTPCMLRGSTEIVNACKKKLGIKVGETTPDKLFTLIEVECLGACVNAPMVQIND
PF01257	Amac_FungiBla	LFVHRDTPENNPNLPFKFTPENEERVAAILAKYPAQYKKGACIPLLDLGQRQQGFTSISVMNEVARLLEMPPMRVYEVATFYTMFNREPVGKYFVQVCTTSPCELCGASKIVKTIEDHLGIRLGETTQDKMFTLVEVECAGACVNAPVMAVNDDYYEDLTAESTIKIIDALKAGKTPKMGPQSGRKGCEPIGGLTTLLEEPTGPG
PF01257	Cang_FungiBla	FVHRNTPENNTDVPFKFTPENLKRAEEIIAKYPPQYKKGAIMPLLDLGQRQHGFTSISVMNEVARLLESPPMRVYEVATFYTMFNRDPIGKHFIQVCTTTPCELCGASTIVKTIEQHLGIKLGQTTNDKLFTLVEVECAGACVNAPVMAINDDYYEDLTPESTKKILDTIKAGGVPKAGPQSARKGCEPHGGATTLLEEPTGPGFGLQAAL
PF01257	Spun_FungiChy	ARPRSLAAQSVRTISNTSVARSDALFVHRDSTDNNATIPFEFTPENLKRAKEIIKKYPPQYKKAATIPLLDLAQRQNGWTSISTMNYVANLLEVPPMRVYEVATFYTMFNRQPVGKYFLQLCTTTPCQLCGSDSILETIQNHLGIKPGQTTDDKLFTLVEVECAGACVNAPVLAVNDDYYEDLTSETTIKILDELKKGNVPKAGPQSGRQNCEPHGELTTLRGEPTGPGFRVRADL
PF01257	Mver_FungiZyg	FVHRDTSDNNANVKFEFNAENLKRAEEIMAKYPPQYKKGAIMPLLDLGQRQLGWTSLPVMNTVAKMVEVPPMRVYEVATFYTMYNREPVGKYFLQLCTTTPCQLCGSTEILKTIEKDLGIKVGETTKDGKFTLVEVECAGACVNAPVLAVNDDYYEDLTSETTIKVLQSLKAGKPIKAGPQSGRLTCEPKGGLTSLTSEPTGPGFMIRPDL
PF01257	Ccor_FungiZyg	MLHRDTPVNNPDVEFEFTSENLEKAKEIIAKYPVQYKKGAIMPLLDLGQRQLGFTSISVMNKVAQMLEVPPMRVYEVASFYTMYNREPVGKYFLQVCTTSPCELCGSTQILDTIKSHLNINVGETTADKMFTLVEVECAGACVNAPVLAINDDYYEDLTPSTTIKILDEIRAGKLPPAGPQTGRKNCEPKDGYTTLIGEPTGPGFRVRSDL
PF01257	Mcir_FungiZyg	LFVHRDTPENNANVPFEFTEDNKKRISEILKKYPEQYKKGAIMPLLDLGQRQLGFTSISVMNEVARLLEVPPMRVYEVATFYTMYNRQPVGKYFLQVCTTTPCQLGGCGSTKILNAVKDNLGIQVGETTKDGKFTLVEVECAGACVNAPVMAINDDYYEDLTPETTEKLLENLKADKAITPGPQSGRHTCEYAPGVYTTLNEEPYGPG
PF01257	Rory_FungiZyg	AIFVHRDTLENNANIPFKFDEDNKKRISEILKKYPEQYKKAAIMPLLDLGQRQNGFTSISVMNEVARLLEVPPMRVYEVATFYTMYNRQPVGKYFLQLCTTTPCQLGGCGSTKILNTIKENLGIEVGETTKDGKFTLVEVECAGACVNAPVMAINDDYYEDLTPETTIKLLENLKTDKPVKAGPQSGRHTCEYAPGVYTTLNSEPYGPGFRVREDL
PF01257	Crev_FungiZyg	AIFVHRDTPENNPSLPFELNAKNKEEAKKILAKYPPQYKKAAMIPLLHLAQKQHGWTSISVMNYVAKFLEVPPMRVYEVATFYTMFNRSPVGKYLLQVCTTTPCELCGASKIVETVEKHLGIKVGETTPDKLFTLVEVECAGACVNAPVISVNDDYVEDLTPEATVKMLDDLKAGKHVTCGPVSG
PF01257	Bden_FungiChy	ASDKLFVHRNTKVNNPDIPFEFTPAEMKRAQEIIAKYPAQYKKGATMPLLDLAQRQLGWVSISSMNYIAKLLEMPPMRVYEVATFYTMYNRDPVGKYFLQVCTTTPCQLCGSDAIVKAAEETLGIKLGETTSDNMFTLVEVECAGACVNAPVMAVNDDYYEDLTVDATKSLLESIKKGTVPKPGPVSGRMNCEPRAGLTSLTTKPTGPGFGVRADL
PF01257	Rirr_FungiZyg	KKTAVIPLLDLGQRQLGWTSISVMNAVAKLLEMPPMRVYEVATFYTMFNRSPVGKYFKSFKIKPGETTPDKLFTLVEVECAGACVNAPVLTINDDYYEDLTPDTTIRILESLKQGEIPKHGPQSGRITCEPKSGLTTLTSKPYGPGEFVRSDL
PF01257	Clim_Corallochytrea	SATRTIFTSMTMRGDQLQVHRDTEENQYDAEFKFTPENLERAKAIMGNYPAAHKRGAVIPILDVAQRQHGWLPISAMNHVAELLEMPRMRVYEVATFYTMFNRNPIGKYHVQVCTTTPCQLRGCDAVLKAVEEKLGIEVGQTTDDKMFTLGEVECAGACVTAPVMSVNDDYYEDLTPETAVKLLENIKAGKPVKKGNQSSRHAAEPITGLTSLTSEPPGPG
PF01257	Clii_Corallochytrea	TSMTMRGDQLQVHRDTEENQYDAEFKFTPENLERAKAIMGNYPAAHKRGAVIPILDVAQRQHGWLPISAMNHVAELLEMPRMRVYEVATFYTMFNRNPIGKYHVQVCTTTPCQLRGCDAVLKAVEEKLGIEVGQTTDDKMFTLGEVECAGACVTAPVMSVNDDYYEDLTPETAVKLLENIKAGKPVKKGNQSSRHAAEPITGLTSLTSEPPGPGFRVRDDL
PF01257	Colp12	SDHLFVHRDSEKNKYDDKFEFTPENLTRAKAIMQNYPPNHQRAAMIPLLDLAQRQHGWLPISAMNAVADLIETPRMRVYEVATFYTMFNRNPVGKYFLQVCTTTPCMLRNSTAILEAIEKKLDIHVGETTPDNMFTLVEVECAGACANAPVLAVNDDYYEDLTPEATVKIIDELKAGRRPQPGPVSGRFAAEPAGGLTSLTSEPYGPGFKVRADL
PF01257	Apar_IchthyosporeaIchthyophonida	FVHRDSKDNNDSVPFEFTAENMERAKAIMANYPPSHQRAALIPLLDLAQRQHGWLPLQAMNKVAEILNMPPMRVYEVATFYTMFNREPMGKYFVQVCTTSPCQLRDCQSIVDTCEKVLGIKMGETTADRMFTLGEVECAGACSNAPLFSVNDDYYEDLTPETAQTILEAFKRGEKPRAGPQNGRLAAEPLGGPTTLLTPPPGPGFKVRADL
PF01257	Cfra_IchthyosporeaIchthyophonida	VSLMSQAQKRTFLTSTSLRSDKLFVHRDSPENNDNTPFSFTDKNLERAKSIIGNYPNGHKTAAVIPLLDLAQRQHGWLPLTAMKAVAKLLNMGDMRVFEVATFYTMFNREPTGKNFVQVCTTSPCQLRGCMDILKTCEDTLGVKVGETSKDMNFTLVEVECAGACVNAPLFAVNDTYYEDLTPETAKKVLEAIKRGETPKAGPQSGRKGCEPAGGLTSLTTPPPGPGFKVR
PF01257	Sarc_IchthyosporeaIchthyophonida	ASYTSSIMFRAIVSAARPCASVLAQRTLTRTMKTSTALRSDKLFVHRDSEQNNKDTPFEFTDENLARCKSIMQNYPRGHQSAAMIPLLDLAQRQHGWLPLNAMKAVAKLLNVGDMRVFEVATFYTMFNRDPIGKKFVQVCTTSPCQLRGCNDILKTCEDTLGIKVGETSKDGEFTLVEVECAGACVNAPLFAVNDTYYEDLTPETAEKVLKAFQKGGETPKAGPQNGRKGCENSFMVREDL
PF01257	Cneo_FungiDik	SLFVHRDTDYNNPSIPFEFTPENLKRAHEIIARYPPQYKKAAALPILDLGQRQNQGWTSISVMNAVAKLLDMPKMRVYEVATFYTMYNREPVAPNFVQLCTTTPCQLGGCGSTKILETIESHLGVHPGQTTKDGKFTFVEVECLGACSNAPMMQIGDDYYEDLTPETTVKILDALARGEKPKPGPQSGRQTSENSAGLTTLTTKPYGPG
PF01257	Umay_FungiDik	SAATRSNLVAVASSSSRTAASRTLSTSAARSSDSLFVHRNTDYNNPDIPFEFNEENAKMAQEIISHYPEQYKKAAVIPLLDLGQRQNSGWVSISVMNYVAKLLEMPPMRVYEVATFYTMFNREPVGKYFLQLCTTTPCMLGGCGSTKILEALESKLGIKAGQTTKDNKFTLVEVECLGACANAPMIQINDDFFEDLTPESMNNIIDKLSNGEKVKPGPQSGRHSSEPANGRTALTSEPYGPG
PF01257	Sdes_IchthyosporeaDermocystida	FVHRKSDPDVKFEFSPENIQRAETIIGNYPIGHKRAALIPLLDLAQRQQGWLPLSAMNYVADYIQVPRMRAYEVATFYTMFIRKPVGKFHIQVCTTTPCMLCNSQSIVDALEKRLGISFGETTPDGLFTLNEVECAGACVNAPVFAVNDDYFEDLTPETAVKIVDQLSKGEIPSSGPQNGRISCEPFGEVTTLKETPKGPGFKVQAGL
PF01257	Nk52_Ichthyosporea	RNLRTSAAVRGGQLFVHRNSDPDQPFEFTKENITRAKNIISNYPDGHERSALIPLLDLAQRQAGWLPISAMNHVADFLKVPRMRAYEVATFYTMFNRKPVGKFHLQVCTTTPCMLCNSDSIVDTLKDKLGIGFGQTTDDGIFTLNEVECAGACVNGPVMAVNDDYYEDLTPESTNAIVDSLKKGVVPPAGPQSGRTCCEPAAGLTSLTEEPKGPGFKVRSDL
PF01257	Adig_Metazoa	FVHRDTPENNPDIPFEFSEKNHERAKVIMDNYPEGHKAAAVIPLLDLAQRQHGWLPISAMNYVADYLDMPRMRVYEVATFYTMYNREPVGKYHIQVCTTTPCHLRDSDMVVDVIRKKLGIQMGGTTKDGLFTLSSVECLGACVNAPMMQINDNYYEDLSNKDVEEILDDLIAGRNPKPGPRSGRFSCEPAGGLTTLTETPKGPGFGVRADL
PF01257	Skow_Metazoa	GSQLRSFHKAAPVCSDKLFVHRDTPENNPGTPFKFTPENLKRVKDIIGNYPEGHQAAAVIPVLDLAQRQHGWLPISAMHEVAGILEMSKIRVYEVATFYTMFNREPVGKYHIQICTTTPCMLRDSDGILDVIKNKLGIGVGETTKDNMFTLGEVECLGACVNAPMVQINDNYYEDLTTKDMEEIIDDLKANRTPKAGPRSGRFACEPHGGLTSLNTPPTGPGFGIRSDL
PF01257	Tadh_Metazoa	HRDSKDNNLDIPFEFTEKSKKRAEQIIANYPEGHKNAAIIPLLDLAQRQHGWLPLTAMNYVADYLSVSRMRIYEVATFYTMFNRYPMGKYHIQICTTTPCMLRDSDSILNVIKSKLGIEIGQTTKDGLFTLSEVECLGACVNAPMVQINDDYYEDLTTNDMEEILDSLKAGSKPTAGPRSGRKCAEPITGLTSLSSPPTGPGFGVRDDL
PF01257	Bflo_Metazoa	RQTRALHRSAPAMGGGGQLFVHRDSPENNPDTPFEFTQENLNRVKLIINNYPVGHEAAAVIPVLDLAQRQHGWLPLSAMNKVAEILKMPRMRVYEVATFYTMFNRKPVGKYHVQICTTTPCNLGGVGSDVILEAIKKKLGINVGETTKDNMFTLIEVECLGACVNAPMVQINDNYYEDLTAADMEEILDDLMAGKTPKAGPRNGRFASEPLSGLTSLTTPPTGPGFGVRDDL
PF01257	Xtro_Metazoa	RYLHTTTAYNGAGGASFVHRDTPENNPDTPFEFTSENYKRIEAIIGNYPEGHKAGAVIPVLDLAQRQHGWLPISAMNKVAEVLEMPAMRVYEVATFYTMFNRKPVGKYHVQICTTTPCMLCNSDSILEAIEKKLGIHVGETTSDKLFTLTEVECLGACVNAPMVQINDNYYEDLTPSDMEEIIDELKNGRFSCEPAGGLTSLTGPPKGPGFGVRADL
PF01257	Nvec_Metazoa	RNLHRSVPVLSDKLFVHRDTDGNNPDLPFEFNEANLKRAKSILNNYPTGHEKAAVIPLLDLAQRQHDGWLPISAMNYVADFLNMPRMRVYEVATFYTMFNREPVGKYHVQVCTTTPCQLRNADDLLDTLKSKLGIKEGETSKDGMFTLTVVECLGACVNAPMMQINDNYYEDLSMKDAEEIIDDLIAGRTPKPGPR
PF01257	Ctel_Metazoa	IRSLHKTAAVASDHLFVHRDSQANNPDVAFEFTPENVERADAIIKNYPEGHQAAAVIPLLDIAQRQNQGWLPISAMHYVAKYLQMPKMRVYEVATFYTMFNREPIGKYFVQICTTTPCILGGCGSDAILEAITKNIGIKPGQTTKDNMFTLMEVECLGACVNAPMVQINDNYYEDLTVEDINGILDDIKAGKVPKAGPRSGQNGRFASEPKGGLTSLSTPPYGPGF
PF01257	Lgig_Metazoa	VRAIHKSSSSLSGHVFVHRDTDKNNPDIKFEFTAENQKRVEAIMANYPEGHKQAAVIPLLDLAQRQYGWTPISVMHTVADILKMPRMRVYEVATFYTMFNREPVGKYFVQICTTTPCMLGGVGSDVILDAIKENLGVKVGETTSDGMFTLSEVECLGACVNAPMIQINDNYYEDLTVDDTHRILNELKAGKIPKPGPQSGQEWRFASEPKTGLTSLTEEPKGPGFGVRSDL
PF01257	Ocar_Metazoa	RCLRGSTAWFSAKSDFVHRDTPENNPETPFDFTKENLARLQNIMGNYPEGHQAAAVIPALDLAQRQHGWLPLSAMHKVADLLGMSRMRVYEVATFYTMFNRQPVGKYHIQICTTTPCMLCGSDAILDTIKTKLGIGVGETTPDKKFTLSEVECLGACVNAPMLQVGDDYFEDLTPELTAEILDAFAQDKKPTPGPRKRFAAEPITGLTSLTEPPKGPGFGVRNDL
PF01257	Hmag_Metazoa	RNIFKTAVSLSDKLFVHRDTEYNNANTPFEFTEENKKRASVIISNYPKGHESAATIPLLDLVQRQLGWVPLSGMNYVAKMLQMPEMRVYEVATFYTMFNREPVGKYHIQICTTTPCMLCNSDSIMSVIKEKLQINPGETTKDKMFTLSEVECLGACVNAPMVQINDNFYEDLKPSDMVEIIESLAKGIIPKPGPRSGRFASEPAGGLTSLTSPPRGPGFKLQSGL
PF01257	Dpul_Metazoa	SLFVHRDTPKNNPDVPFAFTKENVERANAIINIYPDGHKRAAVIPLLDLAQRQAGGWLPISAMHAVADMLSMPKMRVYEVATFYTMFNRNPIGKHFVQVCTTTPCWLNGSEKIMNCLKKKLNLNNGETTPNGEFSLLEVECLGACVNAPMMQINDNFFEDLTEKDTEEIIDDLKAGREPKAGPRNGRFAAEPRDGLTSLTEPPPGPGFKIQPGL
PF01257	Dcos_ChoanoflagellataStephanoecidae	FVHRDTPENNESTPFEFTQENLDRIAAIIKNFPEGHSAAAMIPALDIAQRQNGGWLPLTAMNAVAKVLDVPKIRVYEVATFYTMFNRDPVGKYFVQVCTTTPCMVCGAYDVFDHIKNKLGVDNGGTTKDGLFTVLEVECLGACTNAPMIQINDEFYEDLTLKDIDYILDALKEGKTPKPGPYNGRLAAEPLGGLTSLTTEPTGPGYGVRADL
PF01257	Hnan_ChoanoflagellataAcanthoecidae	FVHRDTFENNPNTPFEFTDKNIQRIEALTLNYPPGHQAAAVIPALDLAQRQNGGWLPIAAMNTVAKMLDMPKMRVYEVATFYTMFNRDPIGKFHVQVCTTTPCLVCGAYDVLDAVEENLGIKNGETSEDRLFTITELECLGACSNAPMIQINDEYYEDLTVDDVHRILDMCKRGETPKPGPQSGRKGAEPAGGLTSLKDSSKLPGPGHGVRADL
PF01257	Mbre_ChoanoflagellataCraspedida	MRAQAGRVGTAVAAQRRLLHAAAPLRGDKLFVHRDTEKNNSSIAFEFTPENMKKVEAITAQFPPGHRAAACIPVLDLAQRQYGGWLPISAMDEVARVLQMPKIRVYEVASFYTMFNRDPVGKYHVQVCTTTPCMVRGAYNIFEHLQKKLGLHNGETSEDGMFTLLEVECLGACSNAPMIQINDEYYEDLELADVDRIIEALRKGETPKPGPQNGRKAAEPLGGLTALTSEP
PF01257	Sros_ChoanoflagellataCraspedida	MGVLAARRSVATSSRSSMAAGKLFVHRDSEENNDETPFKFTDSNMKRVEAIIGQFPPNHRSAACIPVLDLAQRQNNGWLPLNAMNEVAKILRMPKMRVYEVATFYTMFNREPVGKYHIQVCTTTPCMVRGAYKVFDHLKAKLGLRTGRRLKDKLFTLLEVECLGACANAPMIQINDEYYEDLTIEDVDRIVDMLKAGKTPKPGPQSGRNAAEPLSGQTTLLETPPPPDHLFRKDG
PF01257	Nspp_Discicristoidea	GKIFLHRDTPDNNARLPFEFNADNKKAFEALLRKYPAQYKKAAVIPALDLAQRQCGGWLPIAAMNHVAKLLEMPPMRVYEVATFYTMFNREKVGKYFVQVCTTTPCMLCDAYDILKTIEDHLGIKTGETTPDGYFTLTEVECLGACANAPMIQVNDDFYEDLTADTARAILDALRKDQRPKPGPQNGRFTSEPQGGQTTLTSEPYGPG
PF01257	Mlei_Metazoa	RCIRTSGVVQGGGAGPHNALLTHLEEQENRADMEWEFTEENKERCKGIIAQYPDGHQQAAAIPLLDLAQRQHGGWLPLAAMNHVAHVLDMAPMRIYEVATFYTMFNRNPVGKYHVQICTTTPCMLRDSDMVVKACKENLGIGMGETTPDKMFTMCEVECLGACVNAPMMQINDAYYEDLSEKDVHEILNDLREGRTPRPGSRIDRFASEPITGLTSLTSPPTGPGYGVRDDL
PF01257	Awhi_IchthyosporeaIchthyophonida	SKSITMMQSLGARLFSRSSLVTGTAIRSISTSRPVRSEGLYVHRDSPDNNPNTEFKWTEPNLARAKAIMDNYPSGHKKGAMIPLLDLAQRQYGWLPLSAMDAVAKLIETPKMRVYEVATFYTMFRREPTGKYHIQVCTTTPCMLRGSGDIVKACEESLGIKIGHSTKDMQFTLSEVECAGACANAPVMAVNDDYLEDLSPEATKQILADLKANKEIKIGPVNSRKASEPISGLTTLTEAPKGPG
PF01257	Pgem_IchthyosporeaIchthyophonida	ARAICTSKSLKSDAMFVHRDSPENNANTPFEFTADNLKRASSIMSNYPESHRKAAMIPLLDLAQRQHGWLPLSAMNSVAKLLQVPKMRVYEVATFYTMFRREPTGKYHIQVCTTTPCMLRGSYEILEACEKALGITVGHSTPDMQFTLSEVECAGACANAPVFAVNDDYYEDLTTTDATEIIGELKENKKRKIGPQNTRKAAEPVGGLSTLREAPKGPG
PF01257	Pisp_FungiNeo	PFKFSPENLKRAEELLKKYPDDFKRGATIPLLDIAQRQHGWCSVPVMNAVAEFLEIPPLRVYEVATFYTMFHREPRGKYLLQVCGTTPCKVCGSDDIFNTIKRELGINIGETTPDGMFTLIEVECAGACANAPVMSINDDYYEDLSPSSVKKILKQLRKGVVPKRGSQTRHSCEPKTGLTALTSEPTGPRCRSDL
PF01257	Mvib_Filasterea	RSVHTGAAVRSDNLFVHRDSPANAENDAPFEWSKENLERIKRILACYPKGHERAGAIPLLDLAQRQNGNWLSLSAMNKVAETLGMANMRIYEVATFYTMFNRQRVGKYFLQVCTTTPCMLGGCGSDIIMKTLKEELKIDNGETTKDGLFTLLEVECLGACVNAPMIQINDDYFEDLTPDTTRQILESLRKGVMPPAGPMSGRKNCEPLTGLTSLTEKPKGPGFKVRKDL
PF01257	Cowc_Filasterea	LFVHRDAGVYKDEPFEFTAENLTRAASIIAIYPPKHQAAATIPLLDLAQRQHGWLPLSAMNTVAKMLDMAPIRVYETASFYTMFNREKIGKYHVQVCTTTPCLLGGCGSDKIMKAVQKNLGVHPGGTTSDGLFTFTEVECLGACVNAPMIQINDDFYEDLTPETTEQILDGFRRGDRPKPGPQKDPATGKLRKSCEPVDGLTTLKEKPTGPGFGVRADL
PF01257	Gpro_FungiChy	RLFHTSPYVASHGGAAQFRKTDYNDPSIPFKFTPENAEHAAAIVQKFPPQYKKGATIPLLHLAQRQNNGFCSISVMNYVAEYLEMPPMRVYEVATFYTMFNKEPIGKYFLQLCTTSPCVVCGADKVLDAIKSHLKIDVGETTPDGLFTLVEVECAAACTNAPVLAVNEDYYEDLTPEKTVKILDELRAGRIPPRGPQNGRKSAEPLGGQRVLKEIPYGPG
PF01257	Falb_Discicristoidea	GWLPINAMNYVAKMLDMPPMRVYEVATFYSMYQRKPVGKFILGVCTTTPCMLRGSTAIMNTIKSHLGNIAVGETTPDGLFTLNELECLGACVNAPVVKINDDYYEDLTTGNIRDILQRLASGQGDTLVPGPQGTRRTCEPAGGLTTLTGPPPGPGFRVREDL
PF01257	Pbif_Breviatea	FEFSQAALEELDTIVAKYPSDKKESAIIPALHLAQKEAGGWLPLTAMKKVAATLKVDPIAVYEVATFYTMFNKQPVGKFHVQVCTNPSCMCRGSGKILDAVSRRLGITVGETTADNMFTVSEVECQGACANAPMLSLNDDYFEDLTPETAVKIIDDIYANRIPIPGPQNGRNGAEGIEGKTTLREPSCGP
PF01294	Acas_Amoebozoa	AIFPRPVQGPLRPVVHCPTIKYNTKLRLGRGFTLEELRGAGITKRFAQTIGISVDHRRKNKSEGPLADNINRLKQYKAQLVLWPKRKESKKHPRKADEAAPEDREKATQLTGAVLPKQKEVRVKAQVVEPMGKGSAFVTLRRARADAKYIGIRKKK
PF01294	Ddis_Amoebozoa	PIHNKVLSNDHFRKHWQMRVRTWFNQPARKIRRRNNRIEKAAKVFPRPIATLKPVVRGSTIRYNMKVRAGRGFTLEELKAAGLTAQYARTIGIAVDTRRVNKTQQSLTLNTQRLKNYQSKLVLFPRKVNAPKKGEATKEEVAKAVQTLKPFTVKSAIAVTCEQTPRKPTEAEKKFSAYATLKAADSKAKTVGIRRKAAEIKAAKAAEK
PF01294	Ppal_Amoebozoa	PIHNKVLSNTHLRKHWQMRVRTWFNQAGRKERRRNTRAEKAAAIFPRPLRSLKPIVRPPTQKYNIKTREGRGFTLEELKAAKLSVRYARSIGIAVDPRRTNISQQSLSLNAQRLKEYQSKLVLFPRKATAPKKGDATKAEIDNAVQNLNVLPFASSKVSVFTPRKVTEDEKKFQAYTTLRAASAKVKNSGLR
PF01294	Mber_Apusozoa	NNVIPNVHCKKDWQNRVKTWFDQPARKKKHRIKRLRKAAAVAPRPAAGPLRPVVRGQTIRYNSKVKAGRGFTLQELKAAGINRHQAQTIGIAVDHRRRNRSGESLRANVQRLQEYRRNLILFPRRKGRAKKGDSTAEECAQATQLTGPLFPISNAFVAPXARAITAEEKKAQAYRALRLARADQKFWGIRKKR
PF01294	Pbif_Breviatea	NNIIPNAHFHKDWQNRVKTWFNQPARKHRRRVNRVKKAVRVAPRPVSGLLRPVVHAQTAKYNMKIRAGRGFSLEELKAAKINVHEALSIGIAVDHRRRNRCEESLKANVARLQQYKEKLIVFGKSDKAECAKASQLTGDILPINTALPKVKAVKVTEEDRKGSVFAKLRCERANAKFVGKREK
PF01294	Bana_Breviatea	PTGNNVIPNAHFHKDWDKRVRTWFDQASQKHSRRVKRTAKAVKIAPRPVDGLLRPAVHCPTKRYNMKVRAGRGFTMEELRAAGVNPKAARTIGIAVDHRRRDKSSQALETNVARLKQYMANLIVFPIKGAKPRKGDTVDKEVLNKVSQLPKGRLMPVKA
PF01294	Stet_Breviatea	NNIIPNAHFHKDWQERVKTWFDQPGRKKRRRIQRVQKAIEVAPRPVDGLLRPIVRCPTKRYNIKVRAGRGFSLEELRAAGVNPRQARTIGIAVDHRRRNKSVQSLELNVQRLKEYKSKLILFPLNPAKVQVDECGDKEVLAQVTQLGAGELMPI
PF01294	Amac_FungiBla	NNQLPNQHFRKNWQIRVKTWFNQPGQKKARRVTRAAKAARIAPRPVDGFLRPAVRCPTVKYNRRLRAGKGFTLDELKAAGVNRKEAHGLGISVDFRRKSRSEEALSLNVQRLKTYKAKLIVFPKKAGKAKKGDASADEIAQATQLKGFVLPVSNAVEAEAPRAITAEEKEFSAYVALRKARTLARYNGIRTKRAAEKAAAEADAKK
PF01294	Cang_FungiBla	NNQLPNQHFRKDWKIRVKTWFNQPGQKKARRVARAAKASVIAPRPVDGLLRPAVRCQTAKYNRRIRAGKGFTFEELKAAGINRKEAATIGISVDFRRKNRSEEGLAANVQRLKTYKSKLVLFPKKGAKPEEVAAAAQLRGFVHPIVNVYEQEPARAITEEEKNFNAYVALRKARTLARYHGIR
PF01294	Mcir_FungiZyg	NNQLPNQHFRKQWDLRVKTWFDQAGRKKSRRIARVQKAGRIAPRPIDGLLRPAVRCPTVRYNMKLRSGRGFTLEELKEAGVRRKEARSIGIAVDFRRRNKSNESLELNVQRLKAYKAKLIVFPRKAGKAKKGDSEAAEVASAVQLRGPLFPVEQVAAAPEARAITAEEKSTNAYMKLRYARSAARTLGAREKRARDKAEEEANKKK
PF01294	Rory_FungiZyg	MVLKHNNQLPNQHFRKQWDRRVKTWFDQAGRKKSRRIARVQKAGRIAPRPIDGLLRPAVRCPTVRYNMKLRSGRGFTLEELKEAGIRRKEARTIGIAVDHRRRNRSNESLELNVQRLKAYKAKLIVFPRKAASPKKGDSEAAEVASAVQLRGALFPVEQVAAVPEARAITAEEKKANAYMKLRYARSAARTLGAREKRARDKAEEEANKKK
PF01294	Mver_FungiZyg	NNQLPGEHFRKDWQSRVKTWLDQAGRKKSRRIARVQKAARIAPRPVDGLIRPAVRCPTVKYNTKLRAGRGFTLEELKAAGIRRKEALSIGVSVDHRRRNKSEESLQLNVQRLKAYKSKLIVFPRKAGKAKAGDAEATELSAATQLTGALFPVTQAWGKEKARKITEEEKNNSAYEQHRKARSVARLHGIR
PF01294	Rirr_FungiZyg	NNRIPNVHYHKDWQLHVKTWFDQPGRKKRRRLNRINKAARIAPRPVELLRPAVRCPTLKYNTKLRAGRGFTLDELKEAGIRRKEXLTIGIPVDHRRKNRSVESLQLNVQRLKTYKSKLIIFPKNAKKPKKADSAPAETANATQQKGAVLPIKQTWTREKARPITDEEKAVSAYAVLRKARSDARLVGVR
PF01294	Ccor_FungiZyg	MVLKHNNQLPNAHFRKDWQLRVKTWFDQPGRKLRRRQNRAKKAATVAPRPVDGLLRPIVACPTNRYNMKVRAGRGFTFDELKAAGINRKEARSIGIAVDHRRRNRSEESLQRNVERLQLYKSKLIVFPRRAGKAKKGDSEAAELAQASQVSGELFPVKNTVTIEEPRAITSEEQTFSAFQTLLNLRSDLRQAGNRAKIAKAKAEEEAQKVK
PF01294	Bden_FungiChy	NNQLPNQHFRKDWKIHVRTWFDQPGKKLSRRVKRVKKAAKIAPRPIDGLLRPAVRCPTVRYNTKLRAGRGFSLEELKEAGISRHFARTVGISVDHRRRNRSVESLQGNVQRLKEYQSKLIVFPKKANKPKNGDSEAAVVATATQLKGALMPISQPPLTDLARKITGTPAVHAFDTLIKARSDKRMFGMREKLAKEQAEEE
PF01294	Spun_FungiChy	NNVLPNAHFRKDWQLHVRTWFDQPGKKKSRRVHRIKKAAQIAPRPVDGLLRPAVRGQTVKYNMKLRAGRGFTLEELKAAGIRRKEARTIGIAVDHRRKNRSVEGLEANVQRLKEYSARLIVFPKKANKPKKGDADAATVAAATQLRGPVLPIVQPENTDIERPIGEAPKVQAYATLRKARSDKRLKGVREARAKAAAEEEKAKK
PF01294	Adig_Metazoa	MAPKHNNIVQNNHFHKKWQNYVRTWFNQPGRKKRRRLNRKKKALEIAPRPVAGPLRPIVHCPTFKYNSKVRAGRGFTLEELKTAGIPRKFARTIGIAVDPRRKNRSAESLQANVQRLKEYRSKLILFPRKPGKPQKGDSAPAELEKAVQLQGPIMPIQRSHLPIKARKITDEERKFSVFKHMRKERRNARMVGVRAKKAREKAEEEAFSKK
PF01294	Nvec_Metazoa	MAPKRNNIIPNGHFHKDWQRYVKTWFDQPGRKKRRRVARQTKAAKIAPRPVAGSLRPIVRCPTFKYNTKVRAGRGFTLDELKAAGIPRKVAPTIGIAVDHRRKNRSAESLQANVQRLKEYKSKLIVFPRKANKPKQGDSEAADLANAVQLQGPVMPIPQESVPIKARPITEDEKKFSVFKTMRIERANARLIGIREKRAKEKAEAEAMKKK
PF01294	Tadh_Metazoa	MGHYRNKIIGNAHFRKDWQRRVRCWFDQAGRKNRRRLARQKKAAKIAPRPVEGSLRPVVRCPTFKYNTTVRAGRGFTLEELKTAGIHPKVAMTLGIAVDYRRRNRSSESLQANVQRLKEYTSKLIIFPKKASKPKKGDSEAAELSLATQLTGPVMPVQQTKPVSKARAITEEEKKISVFRAMRVARANARLVGIRQKRRKEKAEAELKLKK
PF01294	Hmag_Metazoa	NNVLPNGHFHKHWQNYVRTWFNQPGRKKRRRTARQKKALAIAPRPVAGSLRPVVRCPTFKYHTKVRSGRGFTLEELKTAQIKLRFAKTVGIAVDHRRKNKSTESLQANVQRLQEYQSKLIIFPRKQNKPKAGDSEASVLTVATQLKGPVLPITQIKTDTKARMITDEERKISVFRSMRVARANARLIGIRAKRVKDAEADAAMKAK
PF01294	Colp12	NNVLPNNHFRKDWQRRVKTWFNQPGRKLRRRTARKTKATAVAPRPVAGPLRPVVRCPTFKYNTKVRAGRGFTLVELKEAGISRKVAQTIGIAVDHRRTNKSVESLQANVQRLKEYKSKLIVFPRNSKKPKKGDSSAEECKSAVALQGAVLPITQPIIRHKARAITEEEQNKSVYKTMRWAMSNQRLAGI
PF01294	Bflo_Metazoa	MTHKHNNVIPNGHFHKDWQNRVRTWFNQPARKIRRRKSRVEKARRVAPRPAGGALRPIVRCSTFKYHTKVRAGRGFTLEEIKAAGLNKKYARTIGISVDPRRRNKSTESLQANVQRLKEYKSKLILFPKKLSAPRKGDSGAEELKMATQLQGAVMPVRTLHKKEKARAPTEEEKKYQAFQSMRMARANCRLLGARQKKAAEEAEAAAQTKR
PF01294	Xtro_Metazoa	MAPSRNGMILKPHFHKDWQRRVATWFNQPARKIRRRKARQVKARLVAPRPVSGPVRPVVKCPTIRYHTKVRMGRGFSLEELKAAGINKKVARTIGISVDPRRRNRSTEGLQTNVQRLKEYRSKLIIFPRKPAAPKKGDSSAEELKLATQLKGPVMPIRSVYKKEKPRVITEEEKNFKAFASLRMARANARLFGIRAKKAKEAAEQDVEKKK
PF01294	Skow_Metazoa	MAKLRNSLIPNGHFHKDWERWVKTWFNQPMRKVRRRKNRIKKARKIAPRPVGGPVRPMVRCPTAKYNTKTRSGRGFSLEELKAAGIYKKFAPTIGIAVDHRRRNKSAESLQANVQRLKEYRTKLILFPKKASKPSKGDSTEEELKMAKQLSGPVMPITRVYKKDKARAITDEEKKHSVFQAMCVARSHARLFGIRAKRAKEAAEEAAMVKK
PF01294	Mlei_Metazoa	MAPKHNNMVFDSHFHKDWQRYVKTWFNQAGKKKRRRTKRMEKAKAVAPRPVAGLLRPVVHCQTIRYNARVRAGRGFTLDELKAAGINKKQALSIGIAVDHRRKNRSQESLQANVLRLKEYKSRLILFPRKASKPKKGDSTQAEIDVATQLTGPVLPIKQTWPDTTARAITDEEKKQSAFQTMRMYRANVRLVGVREKRAKEAAEDDGLGVKKKK
PF01294	Ocar_Metazoa	MAPRGNNIIQNNHYHKHWQRYVKTSFNQPGRKKRRHLARQEKAKRITPRPSAGPVRPVVRCPTFRYNTKIRTGRGFTLEEINAAGLSPKYAQTIGIAVDHRRRNKSTESLQLNVQRLKEYVSRLIVFPRKASKPKKGDSEAEELKLAKQVIGPLFTKPYQGDPPKARIITDAEKKTSVFQSMRIARANARLVGIRAARAKKAEEADLMKKK
PF01294	Lgig_Metazoa	HFHKDWQRYVKTWFNQPARKKRRHDTRLKKARRIAPRPAAGPLRPIVRCPTFKYNSKRRMGKGFSFEELKAVKVSWKEALGIGIAVDFRRKNKSVESLQENVQRLKEYKSKLILFPRNKKKVRAGEASSEEVKMATQLTGKLMPVKSSFKPDKARAVTAEEKKSSAYQQI
PF01294	Ctel_Metazoa	GMIPNSHFHKHWQRRVKTWFAQPARKDRRRTLRAAKAAAIAPRPVAGPIRPMVRCPTFRYQTQVRAGRGFTYEELKAVGINKREARSIGISVDHRRKNRSVESLQHNVQRLKEYKSKLILFPRKASAPKKGDATEEEMKVATQHKGPIMPIKYSPPLPKARAVTAADKKFSAYCTLRVA
PF01294	Nk52_Ichthyosporea	MAGKHNNQIHNAHFHKDWQNRVKTWFDQPGRKKRRRTNRVRKAAVVAPRPVAGSLRPVVHCPTFKYNSKVRAGRGFTLDELKEAGINRKVAKTVGISVDHRRRNKSVEGLQMNALRLKEYKSKLIVFPRKAGKPKKGDSEASELKLASQNTAKDILPIKQIVTRNKARAVTAEEKNVSAYRTLRAARNHAKYHGI
PF01294	Apar_IchthyosporeaIchthyophonida	NNQIPNAHFHKDWQNHVRTWFDQPGRKTRRRLARSKRATAIAPRPVSGSLRPVVRGQTNQYNSRVRAGRGFTLVELKAAGIAPKYARTVGIAVDHRRTNRSEESVQANVQRLKEYRSRLIVFPRGKAPKKGDSTAEECKAATQLTGALLPIRQPVKKLKARAVTAEDTAFKAFYTLRQERANAKFVG
PF01294	Ihof_IchthyosporeaIchthyophonida	NNVVPNAHFHKDWQHHVRTWFNQPGRKTRRRTNRMNKATEVAPRPVSGSLRPVVRGQTSKYNTRVMAGRGFTLVELKTAGIPVKFARTIGICVDHRRTNRSEQSLLANVQRLKEYRSRMILFPRNVKTPKKGDSTAEEIKVAEQLTGDIMPIRQPIRRHRARALTEEDKNFKAFYSLRMARSDAAFVGV
PF01294	Ihou_IchthyosporeaIchthyophonida	TSKYNTRVMAGRGFTLVELKTAGIPVKFARTIGICVDHRRTNRSEQSLLANVQRLKEYRSRMILFPRNVKTPKKGDSTXEEIKVAEQLTGDIMPIRQPIRRHRARALTEEDKNFKAFYSLRMARSDAAFVGV
PF01294	Cfra_IchthyosporeaIchthyophonida	MVRHNNVIPNAHFKKDWQNRVQCWFNQPGRKKRRRVTRQTKAAAIAPRPVSGLFRPAVRCPTAQYNSRIRAGRGFTLDEVKEAGLTAKVARTVGIAVDHRRKSRSVEALSLNVQRLKEYRERLIVFPKRAGRVKSGDSQVEECKAASQLKGAIIPIRQQFTREKARAITEEEKNFGAHYTLRMARSNAKYVGVREKRAKAKAEAAAQAAAKKK
PF01294	Sarc_IchthyosporeaIchthyophonida	MVRHNNVVPNAHFKKDWQNRVQCWFNQPGRKQRRRVSRQQKAVAIAPRPVAGLVRPAVRCPTAKYNSRMRSGRGFTLDEIKEAGLSAKVARTVGIAVDHRRKSRSVEALNRNVQRLKEYNERLIVFPKRAGKAKKGDASAEDIKAASQLTGAIIPVTQQHKREKARAITEEEKNFNAFYTLRMARANAKYVGVREKRAIAKAEAAAAAANKKK
PF01294	Nspp_Discicristoidea	NKQIPNGHFHKKWQTLVKTWFDQPAAKKRRRTARAAKAARIAPRPVAGLLRPAVHCPTQQYNRKLRAGRGFTLEELKEAGVRVKEARTIGIAVDHRRQNRSLESLQLNVQRLKAYRAKLIVFPRKHKHPKKGDSTQEETSKATQLKSAAILPIPQTGLRSKPRKPTEDEKKQSVYAIVRKARSDVRLVGKRAKRAAE
PF01294	Dpul_Metazoa	MAPKRNNMIPNGHFHKQWQRYVKTWFNQPARKQRRHAHRVAKARRVFPRPTTSLKPIVRCPTFRYNTRVRAGKGFSLEELRAAKIPKRFAPTIGIAVDHRRRNKSVESLQLNATRLKVYKSKLILFPRNAKKPQKTDATPEEIKLAQQLTTEVMPITRSYKLEKARAITPADRKFSPYAVLRTARTTARLAGIRAKRAKEAAE
PF01294	Rall_FungiCry	NNVLPNQHFRKHWQTRVKTWFDQPGKKKSRRLARMKKAELIAPRPVDGLLRPAVRGQTVRYNMKLRAGRGFSLEELKAAGVRKKEARVLGISVDHRRKNRSVESLQLNIERLKAYKSKLIVFPRKAKNIKKSESSLEEVKQATQLKTELMPIVNDNTAFEGIKNITAAEKEFKAYETLRKAWNVARYDGI
PF01294	Gpro_FungiChy	MGFRHNNQLPGNHFRKDWQRRVKTWFDQPARKLRRRQARVAKAAAIAPRPVDGLIRPAVRGQTFKYNTKLRAGRGFTLDELKAAGIRRKEALSIGISVDHRRKNRSEEGLALNVERLQAYKTRLVVFPRKAKKPKAGDADAAAVAAATQLTTPILPVTNDKTQTEAPRAVVKDKLPAFFRLRKTWSDTRLSGKREKAARE
PF01294	Aque_Metazoa	NHVIPNAHFKKHWQRYVKTWFDQPARKKKRRMNRLKKAAKLAPRPAKGPLRPIVHCPTRKYNMKVRAGKGFSFEELRAAGIPPRVAPTIGISVDHRRHNKSYESLQTNVQRLKEYKTRLILFPRKGKKPRKEDSDLEACKLAKQLKGPVLPIRQPRKVFEFRAITDEERKESVFEALRKAKADSRLVGVREKRAKQKAEEERQQKK
PF01294	Pisp_FungiNeo	NNQLPNQHFRKDWQLRVKTWFNQPARKVRRRINRVEKAAKIAPRPVDGFLRPAVRAQTLKYNSKIRAGKGFTLEELKEAGVNRNEARFIGIAVDHRRKNRSEESLQLNAQRLKEYMSKLIVFPKKSEAVQLPAGALLPIANAFPREKARKSVTLDKKTAYATLRNAQSDAWLVGIREKRAKELAEK
PF01294	Mvib_Filasterea	SHNNVVPNAHFRKHWQTRVRTWLNQAGRKKSRRTARLKKALAIAPRPVEGSLRPIVRCPTFKYNTKVRAGRGFTLDELAEAKISRKEAKSFGICVDHRRKSRSEEGLRANVQRLKEYKSNLIVFPRRAGAKQLRKGDAPADVRKTAVQLKGAIMPVTQAKQGEKARAITADEKDVKKSVFREMRITRADARLVGIREKRRKALEEEAAMKK
PF01294	Falb_Discicristoidea	NHIIPGSHFRKHWFRNVKTWFDQPGQKKARRVARAQKAIAIAPRPVAGLLRPAVHCQTQKYNAKVRLGRGFTLEELKLAGVCKRKALSIGIAVDHRRKNRSQESLDANVARLKAYKEKLIVFPKNATKATNEDLKNAVQFTGPLFPLEKERKPETVAVTT
PF01294	Clim_Corallochytrea	MAIHGNNILANPHFHKDWDNRVKTWFNQPGRKNRHRRARAAKAARIAPRPVAGLLRPAVTCQSIKYNLRKREGRGFTLTELKKAGISKKVARTIGIAVDHRRDNKSEESLDANVQRLKEYQSRLIVFPKKKGKVQKGDSADVSGTTQLTGAIIPIVNDKTAEQEPRAISNEDLARSAFKTMRFARANARLVGKREKWAREKAEKEEEKKR
PF01294	Clii_Corallochytrea	MAIHGNNILANPHFHKDWDNRVKTWFNQPGRKNRHRRARAAKAARIAPRPVAGLLRPAVTCQSIKYNLRKREGRGFTLTELKKAGISKKVARTIGIAVDHRRDNKSEESLDANVQRLKEYQSRLIVFPKKKGKVQKGDSADVSGATQLTGAIIPIVNDKTAEQEPRAISNEDLARSAFKTMRFARANARLVGKREK
PF01294	Awhi_IchthyosporeaIchthyophonida	HFHKDWQRYVRTWFNQPGRKLSRRKARAAKAIRVAPRPTSSLRPAVRCPTNKYNIRVRAGRGFTLQELKAAGLTAATARTIGIAVDHRRRNRCSESLDLNTQRLKDYQAKLIVFPRKGAAAAIAEATQNEVAPVKQPKNHDKTRPASSMPESKAYAEMRAARSNARLVGIREKRAKIKAEAAALK
PF01294	Pgem_IchthyosporeaIchthyophonida	MAIKHNNILPNVHFHKDWQRYVKTWFNQPGRKLSRRKARSAKAARVAPRPTTRLRPAVRCPTNKYNIRVRAGRGFTIEELKAAGMTKKVAQTIGIAVDHRRRNRSTESLDANVQRLKTYKSKLIVFPRVAGKQKAGDADAAACAAAEQQIGDFMPVQQPKNTDKTRDSLPESTAYRTMRMARSNARLVGIREKRAKEKAAEAAMKASKK
PF01294	Cowc_Filasterea	PRHNNVIANAHFHKDWQHLVRTWFDQPGQKKSRRQARTAKAVKVAPRPVDTLRPIVHAQTFRYHTKIRGGRGFTLEELKEAKINPKFAQTIGICVDHRRVNRSLESLQANVQRLKEYKSKLVLFPRKTKAPKKADSPAELTSKATQVALSAAVPVRQGPAHFKARAITAEDTKRSVYNILRVARADARMRGIREKKKREAAEEAKDKK
PF01294	Crev_FungiZyg	QNKQLPNVHLRKEWDLRVRTWFNQPGRKLRRRRARVAKAARIAPRPTELLRPAVRCPTVKYNRKVRVGRGFTLEELKAAGISAKYAATVGIAVDYRRRNRSEESLSLNVQRLKAYLAKLIVLPRNAKKRTAEDVEAYKNAVQVQGQVVPVAEEAAPEAPRAVADEEKNAKAFVTLRQVRGDYKSHGVAQKRKAELKEK
PF01294	Spom_FungiDik	MAIHVKGQLPNAHFHKDWQRYVKTWFNQPGRKLRRRQARQTKAAKIAPRPVEAIRPAVKPPTIRYNMKVRAGRGFTLEELKAAGVSRRVASTIGIPVDHRRRNRSEESLQRNVERIKVYLAHLIVFPRKAGQPKKGDATDVSGAEQTDVAAVLPITQEAVEEAKPITEEAKNFNAFSTLSNERAYARYAGARAAFQKKRAEEAEAKKK
PF01294	Cneo_FungiDik	NNQLQKNHFHKDWQRRVKTWFDQPGKKKSRRVARSKKALASGAAPLQRLRPAVRCPTQRYNIRIREGRGFTTSELKLAGIRRKEALSLGISVDPRRRSKSEEGQKLNVERLKEYKSRLVVFPKKAGKPKAGDATGDDLTAHITRDSIPLPASYTAEAPRAITDEEKESNAFTTLRLARAAQRNEGQRKKRLAEKEAAEK
PF01294	Umay_FungiDik	MAVKHNNILHNNHFRKDWQRRVKVWFDQPGAKKRRRTAREAKAAKLGLRPVQLLRPAVRCPTLRYNTKIRSGRGFTIEEVKAAGLGKKYARSVGIPVDHRRRNKSEESLKLNVERIKAYQARLVVIPKLTKKNKDKKVDLSNVEAVRQVQSVLPLPAGTEAEKPRAITSEEKEFNAYETLRKARGTHRAAGKVKARIAKKEEEAANAKK
PF01294	Ttra_Apusozoa	SHNNQVPNAHFHKDWQNRVRTWFNQPGRKKRRRNNRLAKAARIAPRPMDALRPAVHCQTIKYGRRLRAGRGFSLLELKTAGINRNYARTIGIAVDLRRKNSSQESVDRNVARLKEYMSRVIVFPRPGKGRRLADAPADVIASVDVATAPRKHPMAVVDEKVNEAPRAITEEDTKFSVYKTLRIERKNQRQHGIRARRAADKAAKAKASKKK
PF01294	Dcos_ChoanoflagellataStephanoecidae	NNVIANVHCHKNWQTRVKCHLNQAGKKKSRRLKRATKSAAIAPRPTGGALRPVIRCMTFKYNTKQRLGRGFSLLELKEAGVSRKKAATIGISVDHRRRNVSLESSQENVARLKAYMGNLVVQKKGKGEAPAVAQLMGTVMPIVKKTTKPKSRAITDEEKKRNVFREMRIARADARMIGIRQKKADQAAAEEALKKK
PF01294	Hnan_ChoanoflagellataAcanthoecidae	NNVIANVHCKKHGDFGWANRVKCHFNQPGKKKSRRVARNLKAATIAPRPVAGAVRPVVRCPTFKYNTKVKYGRGFTLEELKQAGINRKEAPLIGIAVDHRRSNKSVESLQINVQRLKEYKGKLVILKKDAAQEPVAQLISEHVLPFARPDRRVKARAITADEKKADVYREMRIARADARMVGVR
PF01294	Mbre_ChoanoflagellataCraspedida	MTKGHNNVLPNAHFRKHWHNAIWSERGLVRCHFDQAGAKKRRYLARQAKAKKVAPRPTGGDLRPVVRCPTFKYNTKQRLGRGFTLDELKAAGIATRYARSIGIAVDARRRNKDSDALMANVQRLQEYMSKLVVIKGDKSEPVEQLKGVVMPVVKSAVAVETRAITADEKKAHVYREMRQARGIAKSAGKQQKKADE
PF01294	Sros_ChoanoflagellataCraspedida	MTKAHNNMLPNVHLHKHWHNSVWTYRGVVKCHFNQAGKKRRRSLKRQSKAKQVAPRPTGGALRPIARCQTFKYNMRLRAGRGFTPLELKAGLSTRYAQTVGISVDKRRKNRSVEAFQANVARLKEYKSKLVVIRKGGKDQHAVEQLKGVVMPIVQPKHKIQVRAITEKERKRNVFAEMRHMRADAKLAGIRLKVAAEAAAEAAMKKK
PF01294	Ppol_Amoebozoa	NNIVPNVHFHKEWDRRVKLWFDQPAQKKVRKLRRLKKLKAVFPRPLGKLRPAVHPASIRHNNRVRLGRGFTVEELKAAGLNARYARTIGISVDHRRRNKSEESLATNVQRLNEYKSKLVLFPRNPKKTAKGEASAEDLAKVTQVKGTVLPLKTSADHTLQVGKIADYDKNTRVFEVLRKTRADAKLVGIRADKAKKKEAAE
PF01379_PF03900	Acas_Amoebozoa	SSQQQEPRKSVCIGSRDSQLALVQTNYVKAQLEAAHPDVTFTLETMKTMGDKILDVALAKIGDKGLFTKELELGMLHGHIDIAVHSLKDLPTRLPEGLMVGAILERETPNDAVVVNPKHVGSTLATLPSGAVVGTSSLRRRSQLTRAYPHLVFKDVRGNLNTRLRKLDSGEYDALILAYAGLKRLGWGERIAEVLTPEQSLHAVGQGALGVECRAEDPYILSLLSKLHHEETALCCRAERSFLRELEGGCQVPVGVATKLDAEKGTIFLQGAVLSVEGDQCVDGRFEGPASDPEAVGIALARDLKSRGADEIL
PF01379_PF03900	Spun_FungiChy	MASQSGAAAGAAPGSRRTHFVIGTRESQLAMVQAEFVLNRLRNMHPQYTFAIYGMTTKGDKIQDTALSKIGSKSLFTKELEVALAEGTVDLVVHSLKDLQTVLPEGMCLGAITEREDPRDALVLSLKSQSEGLKQLSDLKEGSIVGSSSVRRIAQLKRRFPHLVFQDVRGNLNTRLSKLDAPEGPYAAILLAYAGLHRLGWDDRISQVLGPETILHAVGQGALGIECRGDDAETLELLQPLDHWETRLRCTAERAFMRFLEGGCSVPLGVSTKYAGGGELLMTGSVSSLDGTVEIREEDKCIIEGRTREEDLKAAEALGERLGAALVAKGAREILE
PF01379_PF03900	Mcir_FungiZyg	KTFVIGSRKSQLALVQTYIVRDTLQSLFPQHEFKIETMSTTGDKILNQALSKIGEKALFTKELEIALENGTVDFVVHSLKDLPTVLPEGMFLGAIMERENPNDALVLNERNKGKTLSTLPAGSVIGTSSLRRVAQLKRRYPHLSFTDVRGNLNTRLAKLDDVEGPYSGIILAVAGLMRLGKGDRISEVLSSTDSLHAVSQGALGIECRKADKDVHTLLESLNHNNTRITCLSERALMRTLEGGCSVPIGVNTKLDLENNTL
PF01379_PF03900	Rory_FungiZyg	AASTHSTTTKKNFVIGSRKSQLALAQTHLVRNTLQEIYPDFEFTVEAMSTTGDNILDKALSKIGEKALFTKELEVALADRRVDFVVHSFKDLPTVLPPGMEIGAIMEREDPRDALVLNARNEGKSLETLPAGSVIGTSSLRRVAQLKRRYPHLKFADVIHRNTRLAKLDDENGPFSGIILAVAGLVRLNMGDRISCKLSSSDSLYAVSQGALAIECREKDKEIMALLEPLNHANTRLMCLCERSLMRTLEGGCSVPIGVNTNLENNKLQLHGLVASLDGQNVVEYKDEVNLEGAETREEREALAERLGNSVANQLLKDGADKIL
PF01379_PF03900	Cowc_Filasterea	RVVRVGSRKSELALIQTNSVIARLKAIYSDCTFELTTMSTTGDNVLDRALSKIGEKSLFTKELEVALAQNEVDLVVHSLKDLPTTLPPGMTIGAICKRDSPYDAVILRAKFAGLTLATLPEGSVIGTSSLRRIAQLRRAFPHLVFRDVRGNLNTRLRKLDDAETYAGLILAEAGLDRMGWQGRVSEILKPEVTLYAVGQGALAIECRENDTATLELLKPLQDNDTTLRCTAERAFMRSLEGGCSVPLGVHTEFDASSGQLRLRGGVFSLDGTDSRFAERTITATDAATASGLGQALATEMIAAGAAEILKQARETTHA
PF01379_PF03900	Colp12	IGSRRSQLALIQTHHVEKLLKELYPQHTYEIVTTDTIGDKILDTALSKIGQKSLFTKELEVWLADNHVDLVVHSLKDLPTTLPEGMALGAVLERESPQDAVIMRPENASLTLATLPAGAVVGTSSVRRISQLRRSFPHLQFKDVRGNLNTRLKKLDDDEKVYDALVLAVAGVVRMGWKERITEVLDTSKSLYAVGQGALAIECRLDDKATLDLIAPLIHEKTYFRCGAERAFMRRLEGGCSVPLGVHSQLDEKGHLRLEGGVFSVDGVEAVQGAVEGGVASLADAEALGYKLAEELRAQGASRILAAIRHH
PF01379_PF03900	Bden_FungiChy	IGTRESQLAMIQTTHVQALLKQQYPQLTFDINGMTTTGDQVQDVALSKIGTKSLFTKELEMALDDHSVDFVVHSLKDLPTQLPSGMMVGAILEREQPNDVVIMSLKHSFTGLAQLPAGSIIGTSSVRRSAQLKRRFPNLVFQDIRGNLNTRLKKLDDPASPFAAILLAYAGIHRMGWTDRITEILPTVTILHAVGQGAIGIECRENDTCVRSLLAPLNHTPTRIRCTAERSFMRSLEGGCSVPLGVSTSIEPNDTGIDVLCLTGSVTSLDGSIELRHAMSMDLDSEDIEEKVTMAHKLGTALANVLIERGAKDVLDAIR
PF01379_PF03900	Umay_FungiDik	FPITSMSTAGDQNLRSPLYVIGGEGKAIWTKELEVALEQGAVDAIVHCLKDVPTALPQGLELAAVLEREDPRDALVVKAGLPYKVLDELPVGSVIGTSSVRRVAQLRRRYPHLVFSDVRGNINTRLAKLDAPNGPYTALILAAAGLVRLNMHARITAFLSSPVLLHSVGQGSLAIEVRTRDARIRELIRSIGDWRATFRAEAERSLLKELEGGCSIPVGVETRFDD
PF01379_PF03900	Rirr_FungiZyg	ITIGSRKSQLALIQTKHVQQLLEASFPDHSFPITSMTTIGDQILSKPLFRIGEKSLFTKELEIALQNKVVDLVVHSLKDLPTTLPEGMTIAAVLKRENPRDALVIKEGLLYKSVDELPKGSVIGTGSTRRIAQLKAAFPDLVFQDVRGNLNTRLAKLDDPNGPYSALVLAVAGLERLEMRHRISQIFPSNVMLYAVGQGALAVECRVDDKQIIELLSVLEDKDTRLRCSAERSLLRTLEGGCSVPIGVNTEFIETQNGTRELKLLGLVAKLDGSEVIKAEAQKNVDEDGIEAANELGREVAAILIEKGANRIL
PF01379_PF03900	Ddis_Amoebozoa	KVIIGSRKSQLAMLQTEWVRDRIQELNPGIIVEIKTMDTTGDKVLDVSLSKIGDKGLFTKELEDMMLNGTIDLAVHSLKDIPTKLPDGLKLGAITKRYNTSDAFIANAKKHGKNCKLSELPQGAMIGSSSLRRVAQLKKAYPHLQFKDIRGNLNTRFKKLEDDSNGYDGMILAVAGLERMELTDHISEIIPDSISLYAVGQGSLGIECKDGDDFIQSILNPLIHRESMYCCEAERSMLRDLEGGCHVPIGVVTKLHNQSQPDETLEINAIVLNLDGSKYIESKIIGPSIQYYQLGKSIAQDLINKGSKDIL
PF01379_PF03900	Ppal_Amoebozoa	KNRDTIIIGSRKSQLAMVQTESVMKSLQELHPNLKFEIKTMDTVGDRVLNVALSKIGDKGLFTKELEDLMLSGHIDIAVHSLKDLPTKFPEGLSLGAITKRENCFDAFIAHPKYGKDARLSSMPEGAVIGSSSLRRVSQLKRAYPQLQFKDIRGNLNTRFNKLETSGEYDGMILAVAGLERLGWTDRITEVLQPEVSLYAVGQGALGIECRSDDEFVQSLLAPLNHYETAQCCAAERAMLRELEGGCHVPIGVNTTLEQNNSILSIEGVVLSLDGTKSIRLSHRGEIDQPEIVGKQLALMLKEKGATEIL
PF01379_PF03900	Cfra_IchthyosporeaIchthyophonida	VVAMLQKENPTTKFKVITMDTMGDLVLDTALSKIGEKSLFTKELEVALHNKQVDFLVHSLKDLPTTLPEGMDVGAYCARDNAYDCVLMNPKNHAEKITLADLPAGSVVGTSSLRRIAQLKRAYPALKFEDIRGNLNTRLRKLDSPEPSTTSTPTPVYDAIILARAGIDRMGWETRVSQMLTAENCLFAVGQGAMAVECRQDDAFIKNLLDPINCKVTALVCRAERSLMRSLEGGCSAPLGVDSTYDEEKSVLSLTGGVFSLDGSKYVIETITGEVKNAAAAEEIGVRLAQLMSENGAQPILQAAHDATHASNPSQHPTKA
PF01379_PF03900	Sarc_IchthyosporeaIchthyophonida	MTDEQKTINVGSRKSKLALLQTNLVVGMLEKLNPSIRFNVITMDTLGDLVLDTALSKIGEKSLFTKELETALHLKSVDFLVHSLKDLPTTLPEGMEVGAFCARDNAYDCVVMNQQNHAAKLTLARLPQDAVVGTSSLRRIAQLKRAHPHLTFKDIRGNLNTRLRKLDEPEEGAPVYDAIVLARAGIDRLGWQERVSEMLTSESCLYAVGQGAMAVECRSDDAATKELLRPINCASTALVCQAERSFMRKLEGGCSAPLGTESKYDEATSTLNVSGAVFSLDGSECIIETLSAEVTDSKGAEQLGVDLAHALLQKGAQAILTAAHDATHASNPTQAPTNKA
PF01379_PF03900	Awhi_IchthyosporeaIchthyophonida	EARKVVVGSRKSELALIQTRKVVAWLKELHPELTFEIETMETIGDKIQSVALSKIGEKSLFTKELELPEGMAIGAICKRDNAYDCVLFHPKFDSKMTLETLPSGSVIGTSSVRRIAQLKRGYPHLTFKDIRGNLNTRLKKLEEADTYDAIILAKAGIDRMGWEDKVGHVFTGKECLYAVGQGAMCVEIRENDELTLKLVDEVNDKITSYRCHAERALMRILEGGCSAPLAVESSFDSNGKTLTLQAACLSTDGKERIEATKSLEVETIETSEQLGKEVAQEMLNLGARRVLDE
PF01379_PF03900	Pgem_IchthyosporeaIchthyophonida	EKSVINVGTRKSALAMVQTHKVVEWLTAAHPSLTFNIITMETIGDKIQDVALSKIGEKSLFTKELEIALEAKEIDLIVHSLKDLPSVLPPNMKIGAICERDDPFDCILFHPKHKEANPHIALGSLPEGSVVGSSSIRRVAQLKRNFPQLKFADIRGNVNTRLKKLEEDNVYDAIVLAKAGIDRMKWQEKVGQVLTSNECFYAIGQGAMAVEIRENDPVIQQLVLTVNHTSSEYCCKAERILMRTLEGGCSVPLACKSTYNENTKTLELEGACFSLNGAQKVHFKQSAVVSSVIQAEELGKAVAEAMITAGAQPLL
PF01379_PF03900	Apar_IchthyosporeaIchthyophonida	QRIVRVGSRKSDLAMIQTRKVISLLEEKHPNMKFEIISMDTLGDKILSVALPKIGEKNLWTKDLEVLLESGDVDFVVHSLKDLPSQLPQGMTIGAICERDDPCDSVIFHPRFKGKTLQDLPEGSVIGTSSVRRVAQLKRKFQKLEFRSIRGNLNTRLKKLQDDGSEYAAIILAQAGIDRMGWNEHVGQRLAPPDCYYAIGQGAMAVEIRDNDPITAELVSAVNDRTTELRCLAERALMRTLEGGCSAPLACDSSFDGSKNELSITGIALSLDGEKVAITTVSGVIEEGTREMEGEQAAELGKKLAEEMRLRGAQPILDEAHAIT
PF01379_PF03900	Ihof_IchthyosporeaIchthyophonida	EVKRTIVRVGSRKSVLAMTQTRKVVGLLEKKHPHVDFEIISIDTLGDKILHLALPKIGEKSLFTKDLEVLLEKGMVDFVVHSLKDLPSELPEGMTIGAVCERDDPYDCVLFHPRHVAKTLSDLSAGSIIGTSSVRRVAQLKRRYPNLEFQSIRGNLNTRLQKLHEGGVYEAIILAQAGVDRLGWQDKVGQKLTPPDCYYAIGQGALGVECRNNDAPTQALLATINHRPTQLRCMAERRLMYLLGGGCSAPLACETIYDEEMESMEMTGVALSVDGQKIVVGMATKKVEQGENGEAQALKVARKVAEIMQEKGADAILEEAHSITHSK
PF01379_PF03900	Ihou_IchthyosporeaIchthyophonida	EVKRTIVRVGSRKSVLAMTQTRKVVGLLEKKHPHVDFEIISIDTLGDKILHLALPKIGEKSLFTKDLEVLLEKGMVDFVVHSLKDLPSELPEGMTIGAVCERDDPYDCVLFHPRHVAKTLSDLSAGSIIGTSSVRRVAQLKRRYPNLEFQSIRGNLNTRLQKLHEGGVYEAIILAQAGVDRLGWQDKVGQKLTPPDCYYAIGQGALGVECRNNDAPTQALLATINHRPTQLRCMAERRLMYLLGGGCSAPLACETIYDEEMESMEMTGVALSVDGQKIVVGMATKKVEQGENGEAQALKVARKVAEIMQEKGADAILEEAHSITHSK
PF01379_PF03900	Sdes_IchthyosporeaDermocystida	IRIGTRKSQLALIQAETIQKILKKHHAHLSFDLVTMETIGDKILDISLSKIGEKSLFTKELEIALENGTVDMIVHSLKDLPTLLPPGMMIGAVHQRDSPYDCVIFHPKHISKYSSLSELPVGSVIGTSSQRRIAQLRKAFPHLKFRDIRGNINTRISKLENDSAFDAIILAVAGLERMNLHQKIHQKLTPPLMMYAVSQGALAIECKSSDEHILQLLQPLNHHETFLVCTAERSFMRYLEGGCSVPLGVHSEYRDDNIMKLSGIVVSIDGKDAVSCESCLHVSTPQEAEELGQQLGEALLKAGAARILSEFRKL
PF01379_PF03900	Nk52_Ichthyosporea	ETNSQIVRVGTRKSKLALMQTNIIVDKLQASHQSYKFEIVTMETIGDKILDVALSKIGEKSLFTKELEVALEAGAVDMIVHSLKDLPTHLPDNMAIGLMNKRDSPYDCVLFHPKHRNTVKCIGDLPEGSVIGTSSLRRIAQLKLKFKNLDFKDIRGNIHTRISKLEDKNDYDAIILAEAGLQRMGMSNRIDEVLNDMYYAVSQGCIAVEHKENDAFIETLLKPLKHEQSLYACSAERAYMRFLEGGCSVPLGVKSEFCEGSLLRLNGLVANLEGTDSVTASEEAIVQSVEEAEALGHALGKQMMALGAKKIL
PF01379_PF03900	Adig_Metazoa	VIKVGSRKSQLALIQTNVIIDELKKMNPDRTFEIVSMSTIGDDILNRPLPKIGEKSVFTKELEVALANRSVHLVVHSLKDLPSTLPPGMLIGAVFKRDDPHDVAVFHPRHKGSTLAELPKGSVIGTSSLRRSAQLKKAFPHLIIEDVRGNLNTRLSKLDNGDKYNALILAAAGMERMGWKERIDQILGSNECLYAVGQGALAVEVNVDDTETIELVSKLIDKHTSLCCAAERNFLKTLEGGCSVPIGVNSSLEKTNQLSITGAVFSLDGKECIMDTVTGLLPVPSVQPGGCPHSALTQSCIFVPEEVRDCLVAAEKLGEQLARNLIARGAERVLRAAREEKD
PF01379_PF03900	Nvec_Metazoa	SQLAMIQTNFIVCKLKKLQPELSVELVSMKTIGDEVLDKALPKIGETNLFTKELELALAAGKVDFLVHSLKDLPSLLPEGMGLAAIYCRDDPRDAVIFHAKHKGASLASLPEGSNIGTSSLRRVAQLKRNFPHLKFESIRGNLNTRLRKLDEGDKYDAIVLAKAGLDRMGWEERTDQVLTPKECLYAVGQGALAVELNVSDLKTFELISQLFDFNTTVRCATERSFLRTLEGGCSVPVGVHTELIGDQLTLTGAVLSLDGSECIQETMTKDIPPMSDKGSGQPSMGVTSILVPAHMWPAVHAGEELGHALAQSLIKQGANSILAAARQ
PF01379_PF03900	Bflo_Metazoa	ETTEGRKTVRVGTRKSQLAMIQTNSVVASLKKLCDDVDFEIISMSTTGDKILDTALSKIGEKSLFTKELEKALDDGRVDFVVHSLKDLQSTLPPNMVIGAVLEREDPYDAVLMHPKHATKCLADLPENSVIGTSSVRRVAQLKRKYPHLKFESVRGNLNTRLRKLDEDDMYSALVLAAAGVKRMDWDSRISQTLMPDECLYAVGQGALAVEVRANDFDTLALVSKLNHEETLLRCVTERALLRELEAGCSTPVAVYTEIKDKELYLTGAVLSLDGSECLKETMQTALSDTQTQVGHKASDQQQYVSVVAQTISHQALKAAEDLGIDMAKLLISKGAGDILAVARQQN
PF01379_PF03900	Skow_Metazoa	STTGDNILDKALSKIGEKSLFTKELELALQDKRVDLVVHSLKDLPSMLPDGMAIAAVCKKLRKLDEGDKYSAIILAVAGLERMGWEDRISQILDPEDCMYAVGQGALGVEVRENDQPTIKLVSKLHDDDTLIRCISERAFLRQLEGGCSAPVAVHSEVKNNKLELTGAALSLDGSQCIKKSSEKDLSEQIETLKKETNNKLFVGIIAQDVSQNAMYTAENLGKDLAITLQNEGATEILKVAKE
PF01379_PF03900	Tadh_Metazoa	VVRIGTRKSQLAMIQTHSVVDALREIHPKARIEIVTMDTIGDRVLDKALPEIGQTNLFTKDLEVALTDNKIDLIIHSLKDVPSTLPEGLAIAAIYRRAMTADVVLMNPKHRKSKLSDLPQGNVIGTSSLRRIAQLKRRFPHLKFENVRGNLNTRLKKLDESGIYDALVLAGAGVERMGWQERIDQLTPDECLYAIGQGALGIEIRKNDKKTFSLISAYTDFDSLVCNAAERAFLRFLDKGCSVPIGVYTEFTENKLKITGAVFSLDGSKRVQYSDECTISGLNAKDDCESNYESLSSILCPSEMCNSLIEAERLGKYVAEMILKNHGGEVLAEARQIMKAH
PF01379_PF03900	Ctel_Metazoa	QLALIQTNFVIDSLKKKFPQAEFEIIAMTTTGDQILDIALSKIGEKSLFTRELEERLLDKSIDFVVHSLKDLPTQLPEGLVIGSVLKRDDDRDAVVIRKDLKFKSLADLPDNSVVGTSSLRRAAQIKRKYPKLIIKDIRGNLNTRFRKLDEATDFDCIILAAAGLDRMKWSDRISQYLEPSDCLYAVAQGAMAVECCSNDSDLLTLLNSLHDNPTMLRCIAERAFLRTLEGGCSVPVAVHTEYSPDKMTLTGGVFSIGGKEAIIDSLSTDLSGDEPAAKKSKASAYASIMAESMSQEDMKSAEKLGEDLANEMLKNGADAILKATK
PF01379_PF03900	Lgig_Metazoa	KVFVVGSRKSQLALIQTNTIITKLKECHPGQEFHTITMTTTGDNILDSALSKIGEKSLFTRELENALKEKQVHFVVHSLKDLPTTLPDGLTIGCVYRRDDPYDAVVMSFNNRGKTLATLPPGSIIGTSSLRRAAQIKRKYPHFEIKDIRGNLNTRFKKLNDSNYDAIILAKSGLERMDWHTAIGEVLTPDVCMYCVGQGALAVECRANDEETLRLLAPLHHNDTAIRCIAERAYLKKLEGGCSVPVCVQTELNDTELMIRGGVFSIGGQESVVDSLTVELPLEDTDTEPQSKYAGIMESDEIPHEAFLKAENAGIELAEKLFKQGADEILKKTKKI
PF01379_PF03900	Clim_Corallochytrea	IGSRKSQLAMIQTHQVRDMLQKAHGDDITIEIKTMETIGDKILDRALSRIGEKSLFTKELEIALEQKAVDLVVHSLKDLPTTLPENMTVGAITEREDPADVMILAKRHIGKYKTIHDLPAGSTIGSSSVRRVAQLRLLRPDVTFTDVRGNLNTRLAKLDKEDDPQYDALILAKAGVLRMGWSERISQDFNGDQCLHAVGQGALGIETRADDLTTLEAVKVLECQETALRCHAERAFMRTLEGGCSVPVAVNSALEKGAGSFELTLTGGVFSIDGKKSVRHTVTGTVASRADAEQCGEKLAQDMIGMGAADILAEIRQAEQQPTDPRTAPGTKPG
PF01379_PF03900	Clii_Corallochytrea	EGQKVLRIGSRKSQLAMIQTHQVRDMLQKAHGDDITIEIKTMETIGDKILDRALSKIGEKSLFTKELEIALEQKAVDLVVHSLKDLPTTLPENMTVGAITEREDPADVMILAKRHIGKYKTIHDLPAGSTIGSSSVRRVAQLRLLRPDVTFTDVRGNLNTRLAKLDKEDDPQYDALILAKAGVLRMGWSERISQDFNGDQCLHAVGQGALGIETRADDLTTLEAVKVLECQETALRCHAERAFMRTLEGGCSVPVAVNSVLEKGAGSFELTLTGGVFSIDGKKSVRHTVTGTV
PF01379_PF03900	Aque_Metazoa	ATPSSSSEAKSEKVVIVGSRSSQLAMIQTTTIVQALSEAHPDVKFRVETMKTIGDNVLDKPLPNIGQTNLFTKELETALAAGSIDLIVHSLKDLPTTLPPGMKLAVIYKRDSPTDALLLSPRQSGRSLETLPPGSVVGTSSLRRIAQLKRAFPELEYKSVRGNLNTRLAKLDAASDYDALILATAGLVRMGWTSRIAQELSPSLCMYAVGQGALAIETREDDTQTNSIVQCLNDPNTLIACSAERQFLKSLGGGCSVPIGVESILKDGHYTLRGAVFSLDGHEVISGSKKESLPSLGTPPSFDSCSSFGAKVGEALAQELIKEGAREILKRAREETDA
PF01379_PF03900	Dcos_ChoanoflagellataStephanoecidae	VIKVGSRKSELAMIQTNWVVDTLRKLNPKTDFEIVTMETMGDKVLDIALSKIGTKSLFTKELEVLLLGNQVDFVVHSLKDLPTTLPEKLQLGGICEREDPRDAVIFRKDLEPCTLDSLPAGSVIGTSSLRRTAQLLAKYPDLNFESVRGNLNTRLRKLDESTNDGAEGSRYSALVLAAAGVKRMKWEKRISQYLGKDECLHAVGQGSIGLECRENDEKILKLLGGISHTESTLRCLAERAFMKSLEGGCSVPLGVWTELSEGKMKMSGSVHSLDGKTSAKSELEADVNSDEEAKSAGEQLAEMLRKEGAMDILNSIPRQEN
PF01379_PF03900	Hnan_ChoanoflagellataAcanthoecidae	GQSPNKTTFRIGSRKSKLAMIQTEGVMATLQALNPTYTFELHTMETIGDKVLDVALSKIGTKNLFTRELEVLLVSGDVDLVVHSLKDLPTTLPPGLALGAICEREDPRDAVIFRADLSGSYSNLASLPAGSVVGTSSLRRTAQLLALYPELVFESVRGNLNTRLKKLDSSTNDGAELMRYSALVLAAAGIHRMGWKDRIGEYLDPQYCPYAVSQGSVGIECREGDRATFALLRGIGHKESTYRCIAERACMRVLEGGCSVPIGVFSKLSADRTIHLRGAVHSLDGKVYAKADCTARCTSEAEAEAAGLTLARHLNTAGAKEIL
PF01379_PF03900	Nspp_Discicristoidea	VRVGSRRSELALAQTREVCAALERRWPGLQCALVTMETVGDKVLDRALQTIGDKDLWTKELDAALARGDVDLVVHSLKDLPTALPPGFVVGAVLPREDPRDAVVLHPRHPPDTTLATLPAGAVLGTSSLRRAAQLRRAFPHLRPEVVRGNLNTRLRKLDDGAQYDALVLAVAGLRRLGWHERIAQVVERDTALYAVGQGALAVECRADDARTLELLLPLSDTPTVLATEAERAFLRRLEGGCSVPAGVYCTHDADTHTLDLEGAVYSLDGGREVQARLPSEPCASPDQARDIGTRLADKLLAGGAQAILDKIRQ
PF01379_PF03900	Rall_FungiCry	ITIGTRKSQLALAQTNFVIEKLKIEFPDLEINVIPMSTTGDLNLTQALPKMNDKALFTKELDIALLDRRVDMVVHSLKDVPTTLPPGLLLGAIMEREDPRDVLVCKSKYEKGTKLIDLPDGAVIGTSSWRRTAQIKRNYPKLIVENIRGNLNTRMRKLEEENYDAIIVAYAGMKRLNWTERISSVIDYEEIYYAVGQAALAIQCRESDAFCLSLLNPLNHQESFIRCSVEREFLRTLEGGCSVPIGVNCFILDNEILLKGVLISLDGSKQIE
PF01379_PF03900	Hmag_Metazoa	NGSSKKKYSLVTEKTSVVVGSRKSQLAVIQTKSIVAALCQKEKDVECIIETMDTLGDKILHIALPKIGEKSLFTKDLELALSEKRVDFLVHSLKDLPTTLPQGMAISTIYKRDDPRDCIIFHPKHNGKKLADLPENSIIGTSSLRRVAQLKRKYNKLTFQSVRGNLNTRLQKLEEESLYDAIVLAKAGVDRMGWTEKIGQILSEDECLYAIGQGAITVEVRNDDKYTISILAQLTDMETLLACVAERCFMRTLNGGCSTPIACHSQFSGNNYSLRGIVLNADGSRFLDSTVSTTLQVNILTDQNEPPSYTVSKSGVVINSLYINEFIKAEKCGEELAYCLKKLGADDVLKEVR
PF01379_PF03900	Crev_FungiZyg	LRVGSRDSTLALIQTQLVINQLQQAYPKLKIKLETMKTIGDKIQDVTMNKIGDKGLFTKELEIALASNAVDLVVHSLKDMPAELPENMMLAAITVREDPRDAVVMAPRHADKRDLAELPPNSTVGTGSVRRVAQLQRQYPHLKFQDIRGNLTPRLRKLDAEDSTYDAIVLAYAGLHRQGLGERIVQKLDAVLPAVGQGSLGIEVRCNDQRTRALVACLNDATSRLECIAERQLMRVLEGGCSVPIGVKSRWEGNQLYLRAIVAAPGGEKLVEAETNDYVDGPEAEQRAAALGVRLAEMMRERGADEILN
PF01379_PF03900	Cneo_FungiDik	TFILGTRKSNLALVQTGHVADDLRRLHSAAGSKFGETREEGDDAEQGDVPFVHPYTFSIESMTTVGDRNQTTPLHLLSPYSSTQPAKSLWTDELEARLINGHFDMLVHSLKDVPTVLKDGCEIGCMAKRHDPRDALVVKQGLPYKRLEDLPDGAVVGTGSVRRVAQLKRAFPNLVFEDMRGNLNTRFNKLDNPQSPFSALILAMSGLERLGMAHRATSPLSSPTLMHAVGQGALAIEIRSTDPRVRNCLRGLGHWQTEWSCGAERGCLRVLEGGCSVPVGVESEL
PF01379_PF03900	Ccor_FungiZyg	FSAIILAVAGLKRLGWSDRITQILTPDISLYAVGQGALGIECRENDQDILKALSPLIHQDTLYRTQAERAMLRTLEGGCSVPIGVNSTITKDSNNKINLTLKGLVVSLDGSEVLTHESSIIVNNLEDADKLGQEIANNLLGQGASKILSVIKH
PF01379_PF03900	Mver_FungiZyg	IPIGTRKSALAIAQTVQVQEALERMNPGKEFPLLKMSTTGDNYQSQPLSSIGTTAVFTRELENSLEKKECDLLVHSLKDVPTQVKPGFVLAAMLKREEPNDVMVMRSGEFKALKDFGPEDVVGTSSVRRASQIRRLCPGVQVKDVRGNINTRLAKLDAADSPYTCLLLAAAGLLRLNFDDRITATLPPSIMLHAVGQGSIGVECRSDDLETLALVKPLDHLPTRLRCEAERSVMRVLEGGCSVPIGVWTEFVESTASSEVGSSEGSESSQTENVGTLRLKALVASLDGSEIVEGEAQADVNGSIEAAVELGKVVAAQMLAKGADKIL
PF01379_PF03900	Gpro_FungiChy	VFNVGTRNSKLALVQTEMVVEQLVRLHKEWSFKINSMATTGDKVLDVALSKIGTKALFTKELELALVAKTADFVVHSLKDMPTTLPKGMVLAATLEREDPRDSVVFSDEVKRTKPHVKTLADLPEGAVVGTSSVRRSAQMRRKFPHLLFRDVRGNVQTRLAKLNHLPDPTDPTLPFSAILLAHSGLIRLHLQHIVSYTLDEDESLYAVGQGALAVECRHPDGGASRDAHLLALIRTLEHRPTRVRVECERQVMRRLEGGCSVPLGVRTEIVESSLPNVSTDVDTKVPNDSNGTHTGIPPRRVLHMTAAVWTLDGS
PF01379_PF03900	Mvib_Filasterea	VRVGTRRSELALVQTRLVIRLLQEAIARDGGEAIEFVEVAMATTGDRILHQPLSQIGQKSLFTKELEAALDAQQVDLVVHSLKDVPTQLPAGLVLGAILPRACPDDVLLVNPRHKGVRSLDKLPHQSVIGTSSLRCGAQLLSTFGSDRFVVRDVRGNLQTRLSKLDNTSMEYDALLLAAAGVERLGWSDRIEQRFEGDLYAVGQGALGVECREGDAEARSLLARIHCAATFAATEAERAFLRGLGGGCSTPVGVRTSFDTAANTLTARGAVYLQDGSRKVEHTVSAPLDGDAQTAAEVTGGRLARELMAMGGKEIL
PF01379_PF03900	Mlei_Metazoa	EDRSSTSNTINVGSRCSELALCQTNLVIGMLKDKNPNLNFNVIKMTTKGDQILDKALNKIGGKSLFTKELEVALDDKRVDFVVHSLKMYAVSQGAMAVECREDDVETIAMLAEIHHQETALRVTAERVFMKELNGGCSVPLGTWSLLDEQGLCVSGAVFSVDGKEML
PF01379_PF03900	Mbre_ChoanoflagellataCraspedida	IRIGTRSSVLAMWQTRWVVERLTRAHPGVRFSVVPLSTVGDANLTLDLNKFSTTGIFTDALVRALLAQEVDILVHSLKDLPSTISPGTQLAAIGPREDPRDVVVFHHRHSEIKDLAQLPAGAVVGTSSTRRRAQLAAAYPQLRFAPVRGNVMTRLRKLDDPANGYDALCLAAAGLIRLGLEARIGQFLPLTVSRHAIGQGALGIQVDAEVARLCAVLEDKETTLRCRAERAFLRTIGGGCSLPIATTSTLASGELLLEGLVASLDGALCLAAAGLIRLGLEARIGQFLPLTVSRHAIGQGALGIQ
PF01379_PF03900	Sros_ChoanoflagellataCraspedida	DAVHNFSSRQRVYTIGTRGSVLALWQAHYVLDRLVKKYPTHRFRIKVVDTAGDKDLTTALDKFGTTGVFTDALERALVSGEVDCVVHSLKDVPSTLHPSTRLAAISERHDPRDCVVFNPRHNGRYSSIADLPPGSVLGTSSARRRAFLARAYPSLTFKHVRGNVKTRLRKLDDPANGYDALVLASAGLERLNMEARVGEKLSVDVVPHAVGQAALGVQVRLAEMLHASVQCNETALVCSAERGFLRSLGGGCSLPIAVRSQRDADTGRIVLCGNVCSVDGKTLASRTC
PF01379_PF03900	Pbif_Breviatea	IIIATRSSKLALWQSEYVKAKLNEHYPDIEVELKTFSTKADKILDVPLAKIGGKGLFTKELEIALLNKEADIAVHSLKDVPVNFEEGFVLAALSQRFDPRDALLSEKYASIQELPQNAVVGTTSLRRRLEIKLLRPDIVLKDLRGNINTRIAKLKAGEYDAIILAATGVQKLQIEDEVVHFNPISTEEMIPSMGQATLGIETLDNPELVELLSVLHDKNAEIESTVERDFVRTLEGGCQVPIGIKATIIDENSIDVRAIVGMPDGSEYIQENLIADIDEYKTIGAALAQTFIDQGAKELLARAEK
PF01379_PF03900	Cang_FungiBla	EEAQSITIGSRNSPLAMAQAHIVHDALEQAQQHPKERKFDPEQAFAPQALHRFRISGVATKGDKILDVALAKIGDKGLFTKELEVALMHGDVSLVQHSLKDLETVMPADLSLGAVLKREDKRDALVSAAANKFKSLADLPKGATVGTSSLRRRAQLAAARPDLHIVDVRGNLNTRIAKLLGVHETSKVKYDALVLAAAGLVRLPNAKDVLRDVHIAPIDPQVMVPAVSQGAIGVQVRARDWGTQRLVQLAEDQETRAACDHERTFLRDIQGGCQVPVAVNVEAVPGEDSNNKWKVSAHVWSVDGKQHL
PF01592	Acas_Amoebozoa	RVIDHYENPRNVGSLDKNATDVGTGLVGAPACGDVMKLQIEVKDGKIVNAVFKTFGCGSAIASSSLATEWVKGKSLDEAKVIKNSQIAKHLALPPVKLHCSMLAEDAIKSAISDYEKKQKAKQ
PF01592	Cowc_Filasterea	TAAAIAVRHYHEKVIDHYERPRNVGSLNKNSKFVGTGLVGAPACGDVMKLQIEVDANGKIINAAFKTFGCGSAIASSSFATEWVKGKTLDEAALVKNSEIAEQLHLPPVKLHCSMLAEDAIKAAISDIRKKQVATA
PF01592	Ocar_Metazoa	YHKNVIDHYENPRNVGSLDKGDPTVGTGLVGAPACGDVMKLQIKVEDGKIVDAKFKTFGCGSAIASSSLATEWIKGKTTSKALEIKNSHIAKELSLPPVKLHCSMLAEDAIRAALSDFESKQKNED
PF01592	Rall_FungiCry	KVIDHYERPRNVGSLSKSDKNVGTGLVGAPACDVMKLQIKVDAKGVIEDVKFKTFGCGSAIASSSLATEWIKGKSLDEAMSIKNTDIARELSLPPVKLHCSMLAEDAIKSAIKDYKAKQN
PF01592	Adig_Metazoa	YHKNVIDHYENPRNVGSLDKDDSNVGTGLVGAPACGDVMKLQIRVDEDGKIVDAKFKTFGCGSAIASSSLATEWVKGKSLEDAQKVKNQEIAKELSLPPVKLHCSMLAEDAIKAALSDYKVKQE
PF01592	Bflo_Metazoa	GYHENVIDHYENPRNVGSMDKNDKKVGTGLVGAPACGDVMKLQIEVDDDGKIVDAKFKTFGCGSAIASSSLATEWIKGKSMDEAATIKNTDIAKELCLPPVKLHCSMLAEDAIRAALNDYKLKNKSAEESDEK
PF01592	Lgig_Metazoa	VIDHYENPRNVGSMDKKDKDVGTGLVGAPACGDVMKLQIKVDDDGKIVDAKFKTFGCGSAIASSSLATEWVKGKSVDEAIKIKNTDIAKELSLPPVKLHCSMLAEDAIKAALSDYKIKNK
PF01592	Skow_Metazoa	VIDHYENPRNVGSLDKTDSKVGTGLVGAPACGDVMKLQIKVDKNGKIIDAKFKTFGCGSAIASSSLATEWVKGKTLDEASKIQNTQIAKELSLPPVKLHCSMLAEDAIKAALSDYKVKNK
PF01592	Ctel_Metazoa	VIDHYENPRNVGSMNKKDKNVGTGLVGAPACGDVMKLQIKVDDDGKIIDAKFKTFGCGSAIASSSLATEWVKGKTLDEASSIKNTQIAKELCLPPVKLHCSMLAEDAIRAALQDYKVKNDSPGGDGEGK
PF01592	Aque_Metazoa	KVIDHYENPRNVGSFDKNDAQVGTGLVGAPACGDVMKLQIKVDDDGKIIDARFKTFGCGSAIASSSLATEWVKGKSVNEATQIKNTDIAKELSLPPVKLHCSMLAEDAIKAALKDYQLKRKSKMEE
PF01592	Dpul_Metazoa	KVIDHYEKPRNVGSMDKKDINVGTGLVGAPACGDVMKLQIKVDENGKIIDAKFKTFGCGSAIASSSLATEWVKGKSVNDALKIKNTDIAKELSLPPVKLHCSMLAEDAIKAALKDYQVKQTSHKKAEEKR
PF01592	Tadh_Metazoa	VIDHYENPRNVGSLNKSDENVGTGLVGAPACGDVMKLQIKVDDNGKIVDARFKTFGCGSAIASSSLATEWIKGKSIDDAKKIRNSDIAKELSLPPVKLHCSMLAEDAIRAAIKDYKVKKESKSSEA
PF01592	Nvec_Metazoa	VIEHYENPKNVGSLDKDDATVGTGLVGAPACGDVMKLQIKVDEQGKIIDAKFKTFGCGSAIASSSLATEWVKGKSVDEAQLIKNTDIAKELCLPPVKLHCSMLAEDAIRAALNDYKVKKGKAK
PF01592	Xtro_Metazoa	YHKKVVDHYENPRNVGSLDKNAKNVGTGLVGAPACGDVMKLQIEVDNNGKIIEAKFKTFGCGSAIASSSLATEWVKGKTVDEAMTIKNTDIAKELCLPPVKLHCSMLAEDAIRAALADYRLKQDKDEAAA
PF01592	Mlei_Metazoa	YHKNVIDHYENPRNVGSFKKNEENVGTGLVGAPACGDVMKLQLKVDENGKIIDAKFKTFGCGSAIASSSLATEWVKGKHVNDASKIKNTDIAKELCLPPVKLHCSMLAEDAIKAAIADYKTKR
PF01592	Clim_Corallochytrea	RSYHKNVIDHYENPRNMGAMDKKKKNVGTGLVGAPACGDVMKIQIEVDNDGNITDARFKTFGCGSAIASSSLATEWIKGKSLDDALKIKNQDIAKELRLPPVKLHCSMLAEDGIKAAIKDYRMKSGV
PF01592	Clii_Corallochytrea	YHKNVIDHYENPRNMGAMDKKKKNVGTGLVGAPACGDVMKIQIEVDNDGNITDARFKTFGCGSAIASSSLATEWIKGKSLDDALKIKNQDIAKELRLPPVKLHCSMLAEDGIKAAIKDYRMK
PF01592	Nk52_Ichthyosporea	YHEKVIDHYNNPRNVGSLKKGRKNVGTGLVGAPACGDVMKLQIEVDEKGMIRDAKFKTFGCGSAIASSSLATEMIKGKNINDAVKIKNADIAKELCLPPVKLHCSMLAEDAIKSAIKDFKTKNNMDDS
PF01592	Dcos_ChoanoflagellataStephanoecidae	YHDNVIDHYENPRNVGKLDKKLKNVGTGLVGAPACGDVMKLQILVDDDDNITDVKFKTFGCGSAIASSSLATEKIKGMKIYDAYKIKNSDLAKELKLPPVKLHCSMLAEDAVRSAIRD
PF01592	Hnan_ChoanoflagellataAcanthoecidae	YHEKVVDHYENPRNVGALDKKMKNVGTGLVGAPACGDVMKLQIDVDENGTITDAKFKTFGCGSAIASSSLATEKIKGMSLSDAYKIKNTDIARELSLPPVKLHCSMLAEDAIRAAIKDYASKNE
PF01592	Awhi_IchthyosporeaIchthyophonida	VRTVARRGVTQVTPTAFYHQNVIDHYEKPRNVGSLDKNSTTVGTGLVGAPACGDVMKLQIEVDSNNRIVNAKFKTFGCGSAIASSSLVTEMVKGKSLDEAMEIKNSHIAKELCLPPVKIHCSLLAEDAVKAAIKNFRTKQTAASATA
PF01592	Apar_IchthyosporeaIchthyophonida	YHQNVIDHYEKPRNVGSLNKDAPDVGTGLVGAPACGDVMKLQIQVDENNKIIDARFKTFGCGSAIASSSLVTEMVKGKTLDEAMTIKNSEIARELRLPPVKIHCSLLAEDAVKAAIKDIQAKRTKKQKVA
PF01592	Sdes_IchthyosporeaDermocystida	YHKKVIDHYEKPRNVGSFKKDDIDVGTGLVGAPACGDVMKLQIRVDENGRISDARFKTFGCGSAIASSSLATEMIKGRTLDDAMTIKNTDIAQELSLPPVKLHCSMLAEDAIRAAIKDFKSKK
PF01592	Ihof_IchthyosporeaIchthyophonida	YHENVIDHYNHPRNVGSLSKEAMNVGTGLVGAPACGDVMKLQIQVDENNRIVDARFKTFGCGSAIASSSLVTELVKGKTLQEASLIKNVDISHELRLPPVKIHCSLLAEDAVKAAVKDLLAKRARQVAAS
PF01592	Pgem_IchthyosporeaIchthyophonida	YHQNVIDHYEKPRNVGTLDKNSRRVGTGLVGAPACGDVMKLQIEVDDAGKIIDARFKTFGCGSAIASSSLVTEMVKGKTLDEAGAIKNNVIANELKLPPVKVHCSLLAEDAVKAAINDFRKKQNXKTKR
PF01592	Cneo_FungiDik	GYHAKVIDHYENPRNVGNLPKGDFDVGTGLVGAPACGDVMKLQIRVGEDGVISEVKFKTFGCGSAIASSSYMTERVKGMTLDQAGAVKNTEIAKELCLPPVKLHCSLLAEDAIKSAIKDYQTKRAQRLASA
PF01592	Amac_FungiBla	KVIDHYERPRNVGSLNKADPTVGTGLVGAPACGDVMKLQIKVDEATGKIVDARFKTFGCGSAIASSSLVTEMVRGLSLDEAAQIKNSTIASELSLPPVKLHCSMLAEDAIKAAISDFQKKR
PF01592	Cang_FungiBla	YHEKVIDHYERPRNVGSLPKNDPNVGTGLVGAPACGDVMKLQIKVDDAGKIVDARFKTFGCGSAIASSSLVTEMIRGLSLEEAGQIKNSTIAKELSLPPVKLHCSMLAEDAIKAAISDFKRKR
PF01592	Ccor_FungiZyg	YHERVIDHYEKPRNVGSMNKKDFDVGTGLVGAPACGDVMKLQIRVDDKTGKIIEAKFKTFGCGSAIASSSFMTERVQGMTLDEAAMIKNTEIAKELCLPPVKLHCSMLAEDAIKSAIKDYQSKR
PF01592	Rirr_FungiZyg	YHEKVIDHYERPRNVGSLPRTDSDVGTGLVGAPACGDVMKLQIRVDERTNKIVDVKFKTFGCGSAIASSSYMTERVRGMSLDEASKIKNTEIAKELSLPPVKLHCSMLAEDAIKSAIKDYKSKR
PF01592	Mcir_FungiZyg	KVIDHYERPRNVGSFPKTDRDVGTGLVGAPACGDVMKLQIKVDDATGKITDVKFKTFGCGSAIASSSLVTERVRGMTLDQAGAIKNTEIAQELCLPPVKLHCSMLAEDAIKSAIRDYKSKKR
PF01592	Rory_FungiZyg	ANQVIDHYERPRNVGSFPKTDTDVGTGLVGAPACGDVMKLQIKVDDATGKIVDVRFKTFGCGSAIASSSFMTERVRGMTLEEAGKIKNTEIAKELCLPPVKLHCSMLAEDAIKSAINDYKKKRNAK
PF01592	Mver_FungiZyg	YHPKVIDHYEHPRNVGSLNKSDPFVGTGLVGAPACGDVMKLQIKVDEASGKIVDVKFKTFGCGSAIASSSYMTERVRGMTLEDAGAIKNTEVAKELCLPPVKLHCSMLAEDAIKSAINDYKRKR
PF01592	Crev_FungiZyg	YHEKVIDHYENPRNIGSLDKNDPTVGTGLVGAPACGDVMRLQIKVDDAGNIADVKFKTFGCGSAIASSSYITERVRGMSINDALKIKNTDIAKELCLPPVKLHCSMLAEDAIKSAIKDFRKKRGGD
PF01592	Cfra_IchthyosporeaIchthyophonida	AAAKYHESVIDHYEKPRNVGSMDKKAFNVGTGLVGAPACGDVMKLQIMVDDNHNIVDAKFKTFGCGSAIASSSLVTEMIKGKSLTEASTIKNSEIASELRLPPVKIHCSLLAEDAVKAAINDYQNKLEKKKAREAVAA
PF01592	Sarc_IchthyosporeaIchthyophonida	LATARYHDSVIDHYEKPRNVGSMDKKALNVGTGLVGAPACGDVMKLQILVDDDGNIKDAKFKTFGCGSAIASSSLATEMIKGMSLETAGAVKNADIAKELRLPPVKIHCSLLAEDAVKAAIKDYKQKLAKKQEREAAS
PF01592	Nspp_Discicristoidea	YHQNVINHYENPRNVGSLDKNSAAVGTAVVGAPACGDVMKLQIEVDDHGKIVNAKFKTFGCGSAIASSSLATTMIIGKNLDEAKTIKNTDIARELSLPPVKLHCSMLAEDAIQGAIKDYHKKR
PF01592	Sros_ChoanoflagellataCraspedida	FPLISTARKYHENVLDHYENPRNVGSLDKSKKTVGTGVVGAPACGDVMKLQIEVDDEGRIVEAKFKTFGCGSAIASSSLATVMLKGKTLDEAMSIKNTDLAKELRLPPVKLHCSMLAEDAIHAAIKDYTTKNEAQATTA
PF01592	Falb_Discicristoidea	YHPNVIDHYERPRNVGLLDKKSSSVGTGLVGAPACGDVMQLQVXXDENGRIRDAKFKTFGCGSAIASSSLATEWIIGKSLDEAAAIKNSDIAKELCLPPVKLHCS
PF01592	Ihou_IchthyosporeaIchthyophonida	QIIDHFEKPHNVGSFDKKSLYVGTGLVGAPACGDVMKLQIEVDENNRIIDACFKTFGCGSAIASSSLMTEMVKGRTLDDALTIKNTDIARELRLPPVKVHCSCM
PF01592	Mbre_ChoanoflagellataCraspedida	VIDHYENPRNVGSLDKANEKVGTGVVGAPACGDVMKLQIEVDDNGMIKEAVFKTFGCGSAIASSSLATVMIKGLHIDEAAKIQNSDLAKELRLPPVKLHCSMLAEQAIQAAIKDYRTKSSTDTPQA
PF01592	Hmag_Metazoa	QVIDHYENPRNVGSLNKNDADVGTGLVGAPACGDVMKLQVCDYKGKIVDARFKTFGCGSAIASSSLATEWIKGKNISDAGKIKNTDIAKELSLPPVKLHCSMLAEDAIQAALKDYHSKHNKREKTA
PF01592	Bden_FungiChy	VLLQASRAYHEKVLEHYSKPRNVGSMSKTDPNVGTGLVGAPACGDVMKLQILVDDVTGEIKDVKFKTFGCGSAIASSSFATEKIKGMSVWDAAKVKNTDIAKELSLPPVKLHCSMLAEDAIKSAVKDWESKRQARK
PF01592	Spun_FungiChy	KVIDHYERPRNVGSFPKSNPNVGTGLVGAPACGDVMKLQIMVDDATGQIQDVKFKTFGCGSAIASSSLATEKIKGLKVWDAAKIKNTEIAKELSLPPVKLHCSMLAEDAIKSAVKDWEAKR
PF01592	Umay_FungiDik	GYHEKVIDHYENPRNVGSFLKTEKNVGIGLVGAPACGDVMKLSIKVNEEGIIEDVRFKTFGCGSAIASSSYMTERVKGLSLDEAAKIKNTEIAQELCLPPVKLHCSMLAEDAIKSAIKNYRSKREAT
PF01592	Spom_FungiDik	MYHKNVLDHYNNPRNVGTLPKGDPDVGIGLVGAPACGDVMRLAIRVNKDGVIEDVKFKTFGCGSAIASSSYVTTMVKGMTLEEASKIKNTQIAKELCLPPVKLHCSMLAEDAIKSAVKHYRSKQLTP
PF01592	Ddis_Amoebozoa	NYHERVLDHYNNPRNIGSFDKKDIDVGTATVGAPACGDVMKIQIKVKENIVVDVCFKTFGCGSAIASSSLATEWVKGKTLDQCLEIKNTDIAKHLSLPPVKMHCSMLAEQAIKRAIYDYKVKHEKL
PF01592	Ppal_Amoebozoa	YHERVLDHYNNPRNIGSFDKKDPSVGTATVGAPACGDVMKIQIKVKDNVIQDVCFKTFGCGSAIASSSLATEWVKGKTLDQSLEIKNTDIAKHLSLPPVKMHCSMLAEQAIKHAIYDYKMKLEKQ
PF01592	Mvib_Filasterea	YHQKVIDHYENPRNVGTMDVKKSNVGTGLVGAPACGDVMRLQIEVDESGVIIGAKFKTFGCGSAIASSSYATEKLIGMHMSQAKKIKNLEIAEELCLPPVKLHCSMLAEDAIQGALKDLEAKAQKLKA
PF01592	Ppol_Amoebozoa	NAGSLPKDDPNVGTGIVGAPACGDVMKLQIRVDDNGKIIETAFKTFGCGSAQASSSLASEWIKGKTLDEVLEIKNTDIAHHLALPPVKLHCSMLAEDAIKAAVYDFKVKRDKI
PF01592	Ttra_Apusozoa	MKLQIKVDENGVIADAKFRTFGCGSAIASSSLATEWVIGKTVEEAAAIKNAEIAKYLSLPPVKRHCSMLAEDAIKTALHDYKEKLEK
PF01775	Acas_Amoebozoa	REYQVVGRRIPTDADPTPKVYRMRIFAQNDVVAKSRFWYFLSKLAKVKKANGELLSINELTEKKPSTVKNFGIFLRYRSRTGIHNLHKEFRDTTRVGAVNQMYNEMASVHKATWNNINIIEVNQLKAKQTLRPNIKQFHDSKIKFPLPHRVQRVPMKRYRSTFVARRPSTFW
PF01775	Ddis_Amoebozoa	PIHEFQVVGRHVPTERDANPKIYRMRLFAQTSIHAKSRFWYFLSKIVKMKKSTGEILNVTEIFEDKPQKVKNFGVFIRYNSRSGTHNIYKEYRDLTRCGAVSQMYDEMASRHSARESSIHIIDIKEIAASLTRRANTKQFHDSKIKFPLTHRIAKSKSTFVANRPNTFF
PF01775	Ppal_Amoebozoa	FHEFQVVGRHVPTEREAHPKLFRMRLFAKTSVHAKSRFWYFLSKIQKMKKATGEILNVTEIFEEKPLQVKNFGIFIRYNSRSGTHNIYKEYRDTTRVGAVAQMYDEMASRHSAREKTIHIIEIKEIKAAQARRANTKQFHDSAIRFPLTHRVPRKLPQFKSTFKASKPKTF
PF01775	Cneo_FungiDik	RFTEYSVVGRTLPTEADPAPKLYRMRIFAPNEVVAKSRYWYYLRQLKKAKKAHGEIVALNVIHEKKPLKVKNFAIWLRYDSRSGTHNMVKEFRALSRAEAVESMYQDMAARHRARFRNVQILRVAEVEKKDDIRRPYIKQLLEPGLKFPLPHRRTKSKAWFAANRPSTWA
PF01775	Umay_FungiDik	LTEYMVIGRHLPTEKEPSPKLYRMRIFAVNKSVAESRFWYFVRQLRKMKKATGEIVAIRKIHEKKPIKVKNFAVWLRYNSRSGTHNMYKEFRALSRAEAAESLYQDMAARHRARFASIHILKIAEIEKSEDVKRPYIKQLMAPGLKFPLPHRRPRHVGTFAGQRPNTFY
PF01775	Amac_FungiBla	EYQVIGRKQASAVDANPTLYRMRIFAPNKVVAKSRFWYFLKKFRKVKKATGEIVAVNEIFEKKPTQVKTFGIWLRYDSRSGTHNMYKEYREMTRTQAVFACYQDMAARHRSRFRSVQIIRVAEVAAKDVRRPYIQQLLDPKLKFPLPHRVLRPASKRYSSLFVANRPSTF
PF01775	Cang_FungiBla	MSSASRFNEYQVVGRHQPSETNPQPTLYRMRIFAPNAVVAKSRFWYFLKKFRKVKKATGQIVAVNQVLEKNPTQVKTFGIWLRYDSRSGTHNMYKEYRELSRVNAVQACYQDMAARHRARFRSVQIIRVAEVATKDVRRPYIQQILEKNLKFPLPHRVYRAASKRHNSLFIASRPST
PF01775	Bden_FungiChy	LNEFQVVGRKLPTEKEPVPKLYRMRIFACNSIVAKSRFWYFLKQVNKVKKASGEIVSVNQIYEKKPASVKNFGIWLRYNSRSGTHNMYKEYRELSRADAVTSCYQDMAARHRARFTQIQIIKVAEVKAEDVRRPYIRQILVPDLKFPLPHRVFRAATKSVKTTFTANRPNTF
PF01775	Spun_FungiChy	GRLHEYQVIGRRTPTEKEPVPKLYRMRLFAPNEVVAKSRFWYFLKQVNKVKKASGEIVAVNEIFEKKPLTVKNFGIWIRYDSRSGTHNMYKEYRELTRTDAVAACYQDMAARHRARFSSIQIIKVAEVKSADVRRPYIRQLLEPKLKFPLPHRVTRPASKRYRPVFSGVRPSTF
PF01775	Rirr_FungiZyg	GRLHEYQVIGRKLPNVKDTIPRLYRMRLFAPNEVVAKSRFWYFLKKLKKVKKAAGEIVSINEIFEKRPLLIKNFGIWLRYDSRSGTHNMYKEYRELTRTDAVHSCYQDMAARHRARFSSIQIMRVAELKTNQVRRPYIKQLLEPNIKFPLPHRVQKSKTTFLAKRPST
PF01775	Ccor_FungiZyg	LHEYQVIGRRLPTEKEPVPRLFRMRLFAPNEIVAKSRYWYFLKKVSKVKKTSGEIVAVNEIFEKRPQKVKNFAIWLRYDSRSGTHNMYKEYRELTRAEAVHACYQDMASRHRARSRSVQIIRVAEVAAKDVRRPYIKQLLNNKLSFPLPHRVVKSSSKAHASLYQSKRPSTF
PF01775	Crev_FungiZyg	GRLHEYQVVGRRLPSEQEPTPKLFRMRIFAPNQVVAKSRYWYFLSKLHKAKRANGEVVSVNEIFESQPLKVKNFGIWLRYDSRSGTHNMYKEYRETTRAAAVETCYQDMAARHRARFSSVQIIRVASVKAADVRRPYIQQLLQPKLKFPLPHRVQRPAKKADRALIIAKRPSTFY
PF01775	Gpro_FungiChy	LKEYQVIGRHKPTDNEPTPRLYRMRIFAPNEVVAKSRFWYFIKKLKRVKKANGQIVSVNEIFEKKPTTVKNYGVWLRYDSRSGTHNMYKEYRELNRADAVSSCYQDMAARHRARFSSIQIIRVATVKTADLRRAYTQQLAEPNLKFPLPHRIIRPESKRHTKVFVGKRPSTFY
PF01775	Rall_FungiCry	EYQIIGRKLPTAAEPVPRLYKMRVFAKNEVVGKSRFWYFLQKLKKVKKANGEIVAVNEIFEKRPNQVKNYGIWLRYDSRTGTHNMYKEYREMSRVDAVHSCYQDMASRHRARFRSIQIIKVEEIANSDVRRPYIKQLLEPGLKFPLPHRVYRAPSRRYKKLFVAHRPSTF
PF01775	Mcir_FungiZyg	EYQVVGRKLPSAQDASPKLYRMRIFAPNDVVAKSRFWYFLKKLRKVKKAAGEIVSLNKISEKRPEQIKNFGIWIRYDSRSGTHNMYKEYRAMRRTEAVENCYQDMAARHRARFRSVQIIRVAEVKDADVRRQYIKQLLTPKLAFPLPHRLANVDKKHRALFVAKRPTTF
PF01775	Rory_FungiZyg	LKEYQVVGRKLPSETEASPKLYRMRIFAPNDVVAKSRFWYFLKKLRKVKKAAGEIVALNQIHEKRPEQIKNFGIWIRYDSRSGTHNMYKEYRAMSRVEAVDTCYQDMAARHRARFRSVQIIRVAEVKDADVRRQYIKQLLTPKLAFPLPHRVVKADKKHRALFIAKRPTTFY
PF01775	Mver_FungiZyg	EQEGNLHEYQLVGRHLPTEKDATPKLFRMRLFAPNEVIAKSRFWYFMRKLKKVKKVNGEIVGINEIHEKKPLQIKNFGIWIRYDSRSGTHNMYKEYRELTRNAAVEACYSDMASRHRARSRSIQIIRVAEVANADVRRPYIKQILVPGIKFPLPHRVIRAADKSHRALFMGSRPSTFY
PF01775	Pisp_FungiNeo	LHEYQVVGRKLPSEKDANPRLFRMRLFAPNPVIAKSRFWYFLKKVNKVKKMSGEIVNVSEIFEKKNRVKTFGIWLRYDSRSGTHNMYKEYRQLSRADAVTNCYQDMAARHRVRFGSVQIIRVAEIKAADVRRPYVKQLIQNDLSFPIPHRITVKESKKNNSTFVAKRPNTF
PF01775	Awhi_IchthyosporeaIchthyophonida	KLHEYQVVGRKRPTEVDPTPKLFRMRMFAPNQVIARSRFWYFLKKVNKVKKMTGEIVSCVEIFEKRPQKVKNFGIFLRYDSRSGTHNVYKEFRDLTSTGAVSQLYQDMAARHRSRSRSIQVIRCDEIPAGKCRRPGVKQFHDGKIKFPLPHRVAKPAKENKSTFLASRPSTF
PF01775	Pgem_IchthyosporeaIchthyophonida	KLHEYQVVGRKQPTAADPKPKLFRMRMFAPNQVIAKSRFWYFLKKVNKVKKMTGEIVSCMEVFEKKPEKVKNYAIFLRYDSRSGTHNAYKEFRDLTAAGAVSQCYQDMAARHRARARSVQIIRCDEISASECRRANIKQFHNSKIRFPLAHRVPRPNKETNSLFLANRPGTFF
PF01775	Apar_IchthyosporeaIchthyophonida	MPISKKMNEYQVTGRKVPTEKEPQTKIYRMRVFAPNPVVARSRFWYFLTKLKKIKRAVGEILSCNQIFDKSPLRIKNFGVWLRYDSRSGTHNMYKEYRDVTVTGAIASLYQDMAARHRSRGQSIQIVKVDEIPAAKTRRANIKQFHDQKVRFPLPHRVLRPSKVHKATYLAKRPNTFY
PF01775	Ihof_IchthyosporeaIchthyophonida	MPISKKMKEYQVTGRKVPTEKEPQTKIYRMRVFAPNPVVARSRFWYFLSKLQKIKRAVGEVLSCNEIFEKSPLRIKNFGVWLRYDSRSGTHNMYKEYRDVTVTGAIAALYQDMAARHRSRGQSIQIVKVDEIKAAQARRTNIKQFHDAKIRFPLPHRILRHNKVQRATYLARRPSTFF
PF01775	Ihou_IchthyosporeaIchthyophonida	MKEYQVTGRKVPTEKEPQTKIYRMRVFAPNPVVARSRFWYFLSKLQKIKRAVGEVLSCNEXFEKSPLRIKNFGVWLRYDSRSGTHNMYKEYRDVTVTGAIAALYQDMAARHRSRGQSIQIVKVDEIKAAQARR
PF01775	Spom_FungiDik	ALKEYQVVGRKVPTEHEPVPKLFRMRLFAPNESVAKSRYWYFLKMINKVKKATGEIVAINEISEPKPLKAKVFGIWIRYDSRSGTHNMYKEFRDTTRVGAVEAMYADMAARHRARFRSIRILKVVEVEKKEDVRRNYVKQLLNPHLKFPLPHRRTGVVGLAGKKVFAPHRPSTFY
PF01775	Adig_Metazoa	MKIRGELKEFEIIGRAVPSEKDESPPLYKMRIFAPDEVVAKSKYWYFCSRLKKIKKTRGEIVSCQQIFERKPLKIKNFGVWIRYDSRSGTHNMYREYRDLTVTGAVTSCYRDMAARHRARGSSIQIIKVNAIPAKKCRRPYIKQFHNSKIRFPLPHRIIKSEFSSKFMAKRPHTFY
PF01775	Nvec_Metazoa	MKVQGELKEFQVIGRLMPNKKLTVPPLYKMRIFAPDDVVARSKFWYFISQLKRMKKSQGEIVSCQQIYEKKPLQIKNFGIWLRYDSRSGTHNMYREYRDLTVSGAVTACYRDMAARHRARGYSIQIMKVEVIPASKARRPHVKQMHNSKIKFPFPHRIMKSQFKSKFVAKRPNTMY
PF01775	Bflo_Metazoa	MKAKGTLKEFCVVGRRLPSKTQGTPPLYKMRIFAPDHVVAKSRYWYFMKQLKSVKKANGEVVSCQKVREKNPTSIKNYGIWLRYDSRSGTHNMYREYRDLTVASAVTACYRDMGARHRARAHSIQIMKIEEIPAAKCRRPSVKQFHASKIKFPLPHRVTKRLHNPRFTTRRPNTFF
PF01775	Xtro_Metazoa	MKASGTLREYKVIGRSLPTPKAPSPPLYRMRIFAPNHVVAKSRFWYFVSQLKKMKKSSGEIVYCGQVYEKTPLKVKNFGIWLRYDSRSGTHNMYREYRDLTTAAAVTQCYRDMGARHRARAHAIQIMKVEVIPASKCRRPAIKQFHDSKIKFPLPHRVLRRQHKPRFTTKRPNTFF
PF01775	Skow_Metazoa	LREYQVIGRRHPSEKDAAPSLYKMRIFASNSVAAKSRFWYFCNRLKKIKKSTGEIVSCRRMYDKTPLKVKNFGVWLRYDSRSGTHNMYREYRDMTVASAITQCYRDMGARHRARAHSIQILKVEKIAASKCRRPHVKQFHNSKIRFPLPHRTTVQLHKPRFTTRRPNTCF
PF01775	Ctel_Metazoa	MKARGQLREFKVIGRMMPSPKNPRPAMYQMHIFAPDYIVAKSRFWYHVTQLRKMKKTGGEIVCCQRVYEKRPLTIKNFGVWLRYDSRSGTHNMYKEYRDLTTEAAVTQCYRDMGARHRARAHSIQIMRVAPIAAGKCRRAGVKQFHDSEIKFPLPHRVNRRLHHPRFTTTRPHTHF
PF01775	Dpul_Metazoa	MKASGLLKEYKVVGRKLASEKEPNPPLYRMRIFAPDHIVAKSRFWYFLRQLRKFKKATGEIVSCQMVHDKSPLKVKNFGIWLRYDSRSGTHNMYREYRDLTVSAAVTQCYRDMGARHRARAHAIQIIRVEEVANDKCRRPHVKQFHDSTIRFPLPHRANTIDMPELSYRKPKTYF
PF01775	Aque_Metazoa	MKAKGQLKEFKIMGRRLPTEKDKNPQVYRMRIFAPDSVAAKSRFWYFLKMLKKIKKANGEIVYCGKVPDRHPTVIKNVGIWLRYDSRSGTHNMYREYRDLTIAGAVTLCYRDMAARHRARASSIQIIKVEAIPANKCRRPHVKQFHNSKIRFPLPHRVRSGHFKKLFAYQRPIAF
PF01775	Hmag_Metazoa	MKCLGELKEYRIIGRRIPNAKNPQPPLYRMRIFCSDVVSAKSRYWYFMKKLKKLKKAVGEIVQCSEIFDKSPTTVKNFGIWLRYNSRSGTHNMYREYRDVTTTGAVTQCYQDMAARHRARASSIQILKVETVESKNCKRPHVKQMHNSKMRFPLPHRVLKSSFRTTFQARRPHTF
PF01775	Ocar_Metazoa	MKVSGELREYRVIGRRLPSEKVKHPSLYRMRIFAPNDVTAKSRFWYFMKKLRKLKKSVGEVVTCDEIFAEKKVRIKNYGIWLRYDSRSGTHNMYREYRDVTVCGAVTLCYRDMAARHRARASSIQIIKVEEVKAADCKRVHTKQFHNYKPRFPLPHRIVKAHFKTRFAAKRPNTHF
PF01775	Tadh_Metazoa	MAGTPYSEYRVTGRHAPTDKEPNPALYRMRIFASNEVTAKSRFWYFVRKLKKVKKGTGEILECRLITEKTPTKIKNFGIWLRYDSRSGTHNMYKEFRDLTIGGAVTALYREMGARHRARARSIQVMKVEPIVASKTRRQPIKQFHDSKIRFPLPHRIIRSQFKSKFVAKRPNTFY
PF01775	Cowc_Filasterea	MRVTGALRQFEIIGRKLPTEKEPVTKLYRMKIFAPNDIVARSRFWYFLSKLRKFKKTSGEVVSCSEIHEKKPKTIKNFGVWARYDSRSYHHNMYKEFRDLTIAGAVTSCYRDMAARHRVRGRSLHIIKAAEIPAAKCRRVAVTQFHDNALKFPLPHRVLKSKAKFLAKRPHTFF
PF01775	Cfra_IchthyosporeaIchthyophonida	RMRVFAPNAVHARSRFWYFLDKLKKVKKAHGEVISCNEIAEKNSQVIKNFGIWLRYDSRSGTHNMYKEYRDTSITGAVAHMYQDMAAKHRCRGESLQIVKIAAISGAKCRRADVKQFHDKHIRFPIPHRIHRAPKAFRSIYQAHRPTTVKC
PF01775	Sarc_IchthyosporeaIchthyophonida	MPLSKQIREYQVAGRMYPSERYPVPHIYRMRVFAPNAVHARSRFWYFLDKLKKVKKVHGEVISCNEIAEKNGQVVKNFGVWLRYDSRTGTHNMYKEYRDTSVTGAVAHLYQDMAAKHRCRGESLQIIKIAAISGKKCRRADVKQFHDKHIRFPLPHRIHRGPKEFRSTFQASRPTT
PF01775	Falb_Discicristoidea	LTEFVVVGRHVPTEAEPSPKLYRMRIFAPNNLVAKSRYWQYMKKLQRIKKSVGEILHVGEVPEKNPNVVKNFGIWIRYDSRSGTHNMYKEYRELSRADAVSACYMDLAGRHRARARSIQIIRIQEVEKSEDLRRAYVQQFLNSKIKFPLPQRRVRATSKSFKTVLKAN
PF01775	Nspp_Discicristoidea	EYLVVGRKRPTEREAQPKIFRMRLFAPNPLVARSKFWYFLRRLANVKKMSGEILATTEIFEKKPLVIKNFGVWIRYDSRSGTHNMYKEYRELTRADAISACYKDMASRHRARFSNIHIMRVGEVAGEENVKRVYTKQFMNSKIKFPLPHRRIRAPSKALHTTFKAKRPNT
PF01775	Clim_Corallochytrea	QLNQYQVVGRSRPTAANPKPSLYRMKIFAPNELVAKSRFWYFIGKVVNLKKGTGQIIGVNQIFEKHPNKVKNFGIWLRYDSRTQTVNMYKEYRDTTASGAVTQAYLEMAARHRARSSVIQIIKVAEIKSSECRRTHITQMHDPNIKFPLPHRALRHPKSHRGKYQAKRPSSF
PF01775	Clii_Corallochytrea	LNQYQVVGRSRPTAANPKPSLYRMKIFAPNELVAKSRFWYFIGKVVNLKKGTGQIIGVNQIFEKHPNKVKNFGIWLRYDSRTQTVNMYKEYRDTTASGAVTQAYLEMAARHRARSSVIQIIKVAEIKSSECRRTHITQMHDPNIKFPLPHRALRHPKSHRGKYQAKRP
PF01775	Colp12	ELHQYQVVGRLRPTAAVPVPQIFRMKLFAPNQLVAKSRFWYFLAQQKKIKKATGEVLSVDEIFEKRPLQIKNYGVWIRYDSRTGTHNMYKEYRELTVNAAITSAYKEMAARHRARSHSVQIVKVEEVPVSKVRREHVKQMLDAHIKFPLPTRVLKAPVGHKTKFQAKRPNTF
PF01775	Mbre_ChoanoflagellataCraspedida	KTPTRLFQYEIIGRKLPSAQDPKPKLYKMTIFAPNEVVAKSRFWYFLPQLKKMKKTTGQIVNIQKMHETREGVVRNYGIWLRYNSRSGTHNMYREYRDVSLANAVSKMYREMAGRHSCRAHSIQIIRTDVVASSDIKREHIKQFLNPDIKFPLPHRRIASQFKSRFVAKRPTTFF
PF01775	Sros_ChoanoflagellataCraspedida	SDIVDHMLRQYEIIGRKLPTEKEPEQPLYKMTIFAPNEVVAKSRFWYFLSQLKKMKRSTGQILRITRIHEKRRGVVRNYGIWLRYDSRSNTHNMYREYRDVSLANAVTNLYREMAARHRCRGRSIQIIRTDVIPASKCIRPHTKQFLDSKIKFPLPHRRFASQFKSRFVAKRPSTFF
PF01775	Dcos_ChoanoflagellataStephanoecidae	MKASGQLTQYVVTGRKKPTATVPKPAIYKMTIFAPDVVTAKSRFWYFLRQLKKIKKAVGEVMDVHVVSEKRPGTIKNYAIALKYDSRSGTHNMHREYRELSKADAVTACYRDMASRHRVRARSLQIISVDEVPASKCLRAGVKMFHDSKIKFPLPHRVMKSQNKSKFVTSRPNTCY
PF01775	Hnan_ChoanoflagellataAcanthoecidae	MKASGNLTQYVVLGRRMPSETQTKPPLYRMTIYAGDTVTAKSRFWYFLKRLKRVKKANGEIISITVISEKRPKAIKNYGIALRYDSRSGTHNMYREYRELSKADAVTALYAEMASRHRVRARSLQVISVVEVASKDCKREYVTAFHNSSIKFPLPHRVMKSQFKTTFAANRPNTCY
PF01775	Mlei_Metazoa	LKEYEIVGKPLSKTNEKTPIYKMTIFAPDEVVAKSRFWYFLRQLKKVRKVNGEILRLTLRSNTSPTKIKNFGIWVRYDSRSGTHNMYREYRDVSRTGAVTQCYRDMAARHRARAHSIQIMKIETVKAADTRRPLTKQMHDNNIKFPLPHRILTYNKKSLFVAERPST
PF01775	Mvib_Filasterea	MKVSGVLHQYQVVGRRSPSKTIPHPAIFRMKLFAPNEVVAKSRFWYFLTRLRNLKKANGEIMSVNEIFETRPGRVENYAVHVRYDSRTGTHNYCKEFRALTINEAVTQCYRDLAARHRVRGRSVQIVRVAKVAAKDCKRAAVTEFHDSNIKFPLAHRVVKAKSKYTAKRPSTFF
PF01775	Nk52_Ichthyosporea	AQLHQYEVVGRRIPSKKDPLGKLYRMKIFAPNDLVAKSKFWYFVKRYHNLKRANGEIVNVTELFEKKPSVIKNFGIWLRYDSRTGTHNMYKEFRGTSITEAVTALYGEMAARHRVRAQSLQIIRTAVVKSSECRRPHMKQLFNESLKFPLPHRVGLPRTRKAKFLAYRPSTF
PF01775	Ttra_Apusozoa	SMTLKEYQVVGRRRPTENMPKPQIYRMRLFAKDEVVAKSRFWYFLSKQRKLKKMDGEILSINQIHEPKRPRVKNFAVWLRYNSRSGTHNMYKEYRALTRANAIEQMYSEMASRHRTRARDIHVVQTAVIKAKAVKRANIKQFVNKDVKFPLPHNVMRVADKQYAKTFRPNRPSTF
PF01775	Lgig_Metazoa	MRVRGELKQYMVYGRHTPSATESNPPIFKMNIFANDKCSAKSRFWYHLRSLKKIKKAHGEILMCKLVGEKKPTVVKTYGVWLRYVSRSGIHNMYREYRELTAAKAVTSCYRDMGARHRARPSSIQIIRVKQVEDDKVRRPNIKQFMKPNVRFPLPHRVNHKLYVPRFSTKRPQTKF
PF01775	Bana_Breviatea	SNMKQFEIVGRRTPNAEHPQPDVYKMSIFANNEVLAKSRYFYFLRKLKKVKRTNAQILSLREVAETKPKNVKNYAIWVRYQSRSGTHNMYKEYRDTTVNGAVEQLYLEMASRHRARKSTIQIMKTEVISAAKVKRANPLQFINPKIKFPLMRPCVRPAQAQNKLTFAPAMPNAYM
PF01775	Pbif_Breviatea	RMKIFAEDEIKAKSRFWYFVRKLRRVKKANGEILAVNEVFEQNPNQVKNYGIWVRYMSRTGNHNMYKEYRDITVNGAVEQMYTEMASRHRARKSSIQLMKAEQIAAADCKRPNTLQFINPKIAFPPARVLRRNNEKRFNKTFEAHRPNAYL
PF01775	Stet_Breviatea	VGRRRPTEATPTPPMYRMRIFAVDEVKARSRFHXFVRKLKMKRTQCEILNIKELKEKKPLNVKNYGMWLRYQSRSGIHNIYKEYRDTTVNAAVDQMYDEMASRHRARRSCVQIMRTAIVPASQCRRAATKQFHDSKVAFPLARKMFR
PF01775	Ppol_Amoebozoa	EFVVIGRALPTEADPKPTIYKMTVFAKNHVVAKSRFWAFIAKFKKVKKTRGEIIAVETIPQTGGIKARNYGILLRYNSRTGTHNVYKEFRDVSRVGAVQQLYDDMAARHRANQGAIQIIQVQELKSKDCKRPIVKQLHSLSFPFSLSH
PF01813	Acas_Amoebozoa	MKGKLKGAQRGHDLLKKKADALAMRFRVILKNIKKNKAAMGAIMRKAHLSLASAKYAAGEFSTSVIENVTQATFKVKLDEDNVAGVHLPIFKNYHGGVRHRAAKELHGLGRGGQQVREARETYIKALDALVELASLQTAFMTLDEVIKITNRRVNAIEYVVLPRIDNTIKYIMSELDEGEREEFYRLKMIQKKKEQRKKAAAAAKGVDVEDEVPYQQQIEQPSDLTNEARDPDLLF
PF01813	Ddis_Amoebozoa	MSGKNRLNIFPTRMALTVMKTKLKGAVTGHSLLKKKSDALTIRFRRILANIVENKQLMGTTMRDASFSLAAAKYAAGEFSNSVIENVSNPTIAVKMTTENVAGVHLPTFEKISEGVVSNSQELTGLSKGGQQINKSRESHIKAVEALIALASLQTAFITLDEVIKITNRRVNAIEYVVKPKLENTISYIITELDESEREEFYRLKKVQGKKKKDLKAKEAQKEENSANKTIMEPASVHKVRSLIDDEPEDAELLYE
PF01813	Ppal_Amoebozoa	MSGKNRLNIFPTRMALTNMKSKLKGAITGHSLLKKKSDALTIRFRKILANIVENKQMMGATMREASFSLAAAKYAAGEFSNSVIENVTNPTIVVKMQTENVAGVHLPTFEKVSESAVSNSQELTGLSKGGQQIGKSRESHVKALEALIVLASLQTAFITLDEVIKITNRRVNAIEFVVKPRLENTINYIITELDESEREEFYRL
PF01813	Ppol_Amoebozoa	MSGKNRLNIFPTRMALTVIKAKLKGAVTGHSLLKKKSDALTIRFRAILSKIVENKQLMGNTMREASFSLAAAKYAAGDFTPTVLENVATALVRAKMTTENVAGVYLPTFTRNVEGSASQELTGLSKGGQQIKCRLEYQKALEALIELASLQTAFITLDEVIRVTNRRVNAIEYVVKPRLENTISCIITELDEGEREEFYRLKKVQGKKKRDIARRDAER
PF01813	Adig_Metazoa	FRKILRKIIETKTLMGNVMREATFSLAEANFAAGDFSYVVLENVDKAQTKIRLRKDNVAGVHLPIFEAYADGTNSYELTGLSRGGQQVGKCQEVYAKAVKLLVELASLQTSFITLDEAIKITNRRVNAIEYVIIPKIEATISYIIGELDEREREEFYRLKKIQEKKKIIKQKAEALKKARGITNDQSANLLEDADDEDLLF
PF01813	Nvec_Metazoa	KDRINVFPSRMALTTMKARLKGAQKGHSLLKKKADALTLRFRKILKNIIDTKHLMGEIMKEATFSLAEATFAAGDFSTTVLENVDKAQTKIKMRKDNVAGVLLPIFEPVSDGTNSYELTGLSRGGQQLSKCQEVYGKAVKLLVELASLQTSFVTLDEAIKLTNRRVNAIEHVIIPRIENTVSYILGELDEREREEFYRLKKIQEKKKIIRAKAEK
PF01813	Ocar_Metazoa	MSGKDRIAVFPSRAAMTLMKARLKGAQKGHSLLKKKADALMLRFRQILAKIIETKMLMGDVMKEASFSLAEATYSAGDFSLGVLQNVDKAQTKVKSRKDNVAGVSLPIFECVSEGADTFMLTGLSRGGQQVAHCKELFGKAVTLLVELASLQTSFITLDEVIKITNRRVNAIEHVIIPRIERTISYITTELDEREREEFYRL
PF01813	Xtro_Metazoa	MSGKDRIEVFPSRMAQTIMKARLKGAQTGRNLLKKKSDALTMRFRQILKKIIETKMLMGEVMREAAFSLAEAKFTAGDFSTTVIQNVNKAQVKVRAKRDNVAGVTLPVFEHYQEGGDSYELTGLARGGEQLAKLKRNYAKAVELLVELASLQTSFVTLDEAIKITNRRVNAIEHVIIPKIERTLSYIVTELDEREREEFYRLKKIQEKKKIIREKAEKEQAKWKKVSGGAEPANLLAEDRDEDLLFD
PF01813	Skow_Metazoa	MSDKERLAIFPSRMALTIMKARLKGAQKGHSLLKKKADALSLRFRQILGKIIETKVLMGEVMKDAAFSLAEAKFACGDFNHIVLQNITKASTKVRSRKENVAGVNLPIFECCPDGTDSYELTGLSRGGQQIDKLKKNYAKAIELLVELASLQTSFVTLDEVIKITNRRVNAIEHVIIPRIESTISYIITELDEKEREEFYRLKKIQEKKKVIKAQAEKDRLERKRDAENEEELVNNLLTDADDEDLLFK
PF01813	Bflo_Metazoa	GKDRLDVFPSRMNMMVMRGRLKGAQKGHSLLKKKADALTMRFRQILAKIIDTKMLMGEVMKDAAFSLAEAKFIIGDVNQIVLQNVTKAQTKVRFKKDNVAGVSLPVFEHYADGSDTYELAGLSRGGQQVSKLKKNYGKAVELLVDLASLQTAFITLDEVIKITNRRVNAIEHVIIPRIENTLSYIISELDEREREEFYRLKKIQEKKKIIREKAEQRAAAMRAQGEYKEPANLLEEEHDSDLLFE
PF01813	Lgig_Metazoa	DKINVFPSRMALTIMKARLKGAQKGHSLLKKKADALTLRFRNILKKIIETKMLMGDVMKTASFSLAEAKFATGDLNHMILQNVTKAQIKVKSKKENVAGVNLPIFEHYQDGADTYELTGLSRGGQQIDRLKKNYAKAIQLLVELASLQTSFVTLDEVIKITNRRVNAIEHVIIPRIERTLSYISTELDEREREEFYRLKKVQEKKKALRKIKEDKKAEEKAAGQFIESSNLLAEDYDEDLLF
PF01813	Ctel_Metazoa	MSGKDDKIAVFPSRMAMTIMKARLTGAQKGHSLLKKKSDALTVRFRMILKKIIETKVLMGQVMKEASFSLAEAKFTMGDFNHLVLQNVNKAQVKVRSKKDNVAGVTLPVFESYQDGSDSYELTGLSKGGQQINRLKKNYSKAVELLVELASLQTSFVTLDEVIKVTNRRVNAIEYVVIPRIERTLAYITTELDEREREEFFRLKKIQKKKGERRAAAELLKAEMALEADGNYDSPANLLEDSRDEDLLFD
PF01813	Aque_Metazoa	MSGGNKDRLHVFPSRMALTQMKGRLKGAQKGHSLLKKKADALTLRFRQILTKIIETKTLMGDAMREAQFSLAAANYSAGDFSQMILQNVDKAQVKLLAKKDNVAGVTLPIFEPAVAGTSSFSLTGLARGGQQVTKCKEMFGKAVELLIQLASLQTSFVTLDEVIKITNRRVNAIEHVIIPRIQNTMKYITTELDEMEREEFYRLKKIQQKKKLQKEKAELEKKKKGLLLSGEEARTIFETGEDEDLLFK
PF01813	Dpul_Metazoa	MSGKDKIAIFPSRGAQTLMKHRLAGAQKGHGLLKKKADALQMRFRSILKKIIDTKVLMGDVMKEAAFSLAEAKFATGDFNQVVLQNVTKAQIKVRSKKDNVAGVNLPVFESYQDGSDTYELAGLARGGQQLGKLKKNYQKAVTLLVELASLQTSFITLDKVIKVTNRRVNAIEHVIIPRIERTLAYIISELDELEREEFYRLKKIQDKKRISRAKAELEKAKRKAEGKIEDEAANILDDAHDEDVLF
PF01813	Mvib_Filasterea	MSGKDRIPIFPTRMALTTMKARLKGAQKGHSLLKKKADALQLRFRSILRKIIDTKELMGQVMKDASFSLAEAMFSAGDFKQGVIERVSASTVKVKAATDNVAGVKLPVFEYYAEGNDSFEFTGLSRGGQHITKCKEMHVKAIQLLIDLASLQTSFLTLDEVIKITNRRVNAIEHVIIPRIERTVAYINSELDERDREEFFRL
PF01813	Sdes_IchthyosporeaDermocystida	MSGKQRLNIFPTRMALTTMKNRLKGAQKGHSLLKKKADALSLRFRSILGKIIKNKELMGEVMKSAQFSLAEATFVAGDFRRTVIENASSAQIKVRAAQDNVAGVKLPVFEHYSEGPDVFELTGLGRGGQQVSQCKEMFVKAVELLVELASLQTSFLTLDDVIKQTNRRVNAIEHVIIPRLEGTIDYINSELDEQDREEFYRLKKVQAKKKKKIQTTLAAEAPVVDIIADNVDSDLLF
PF01813	Nk52_Ichthyosporea	MSGKQRFAIFPTRMALTTMKNRLKGAQKGHSLLKKKADALSLRFRSILGKIIQNKELMGEVMKNAQFSLAEATFVAGDFRRTVIENAADAQIRVKAMQDNVAGVKLPVFEHFSEGADVFELTGLGRGGQQVTQCKEMFTKAVKLLVELASLQSSFVTLDEVIKLTNRRVNAIEHVIIPKLEGTIEYINSELDEMDREEFYRLKKVQEKKKQATSKQNEAKANDANAFADSQGGERDLLSDQVDADLLF
PF01813	Colp12	MSGKDRVAIFPTRMALTTMKNRLKGAQKGHSLLKKKADALNMKFRGIVGKIIENKTLMGEVMKQASFSLAEAKFAAGAFSQVVIESTKKANVKIRSKKDNVAGVILPVFEHYTTGEAGFEMTGLSRGGQQIQNCRKMYIKAIELLVALASLQTSFVTLDEVIKITNRRVCAIEHVIIPKFERTIAYINSELDENDREEFFR
PF01813	Cowc_Filasterea	MSGKDRIPIFPTRMALTTMKNRLKGAQKGHSLLKKKADALSLRFRSILGAIIRSKESMGEVMRLASFSLAEAKFVAGDFSHGVIESAKVAKVRVRTKTDNVAGVKLPVFEQYMDSVGSTFELAGLSKGGQHIARTRLNYIEAIKLLVEIASLQTTFITLDEVIKITNRRVNAIEHVIIPRIENTISYINSELDEMDREEFFRLKKIQKKKKASRAASEAKAALANAATKLAE
PF01813	Awhi_IchthyosporeaIchthyophonida	RLPIFPTRMALTTMKTRLKGAQKGHSLLKKKADALTLRFRSLLKKIVENKTLMGEMMQEAFITMAQATFQAGDFGQFVLENAVNPTVRVKATTDNIAGVKLPVFQYHNDGVDAYQMTGLGKGGKQIAECKSKFAKATELLVELASLQTSFVTLDEVIKATKRRVNAIEYVICPKIENTVAYIISELDERDREEFFRLKKVQNKKKAEKKKAAEKKKVDDEEAEALREKQALGLTSFGEDEGASALADDDDQDLLF
PF01813	Apar_IchthyosporeaIchthyophonida	MSGQGDRINVFPTRMALTTMKNRLKGAQKGHSLLKKKADALTHRFRALLKKIVENKELMGEVMKEAFFSMAQANFTAGDFSKTVMENVKTASIKVKAKTDNVAGVKLPVFEYHNDGENVYQMTGLGKGGKQIQQCKERFQKACELLVELASLQTSFVTLDEVIKATNRRVNAIEYVIIPRIERTVAYVNSELDESEREEFFRL
PF01813	Ihof_IchthyosporeaIchthyophonida	MSGQGDKISVFPTRMALTTMKNRLKGAQKGYSLLKKKADALTLRFRMLLRKIVENKELMGDVMKEAFFSMAQANFTAGDFSNSVKESVKTASIRVKAKTDNVAGVKLPIFEYHNDGEDVFQMTGLGKGGKQIQQCKNSFQKAVELLVQLASLQTSFVTLDEVIKATNRRVNAIEYVIIPRIERTVAYVNSELDESEREEFFRL
PF01813	Ihou_IchthyosporeaIchthyophonida	ALTTMKNRLKGAQKGYSLLKKKADALTLRFRMLLRKIVEQTSFVTLDEVIKATNRRVNAIEYVIIPRIE
PF01813	Sarc_IchthyosporeaIchthyophonida	DRLAIFPTRMALTTIKLRLKGAEKGHSLLKKKADALSLRFRALLKKIIENKELMGDVMKEAFFSLAQANFTAGDFSRGVYENAKVAAIKVKAKTDNVAGVKLPVFEFSLTGLGRGGKNISDCKEAFKKACELLVNLASLQTSFVTLDEVIKATNRRVNAIEYVIIPRLQNTVDFIVSELDELEREEFFRLKKVQNKKKEVKK
PF01813	Pgem_IchthyosporeaIchthyophonida	MSNQGRLPVFPTRMALTLMKNRLKGASKGHSLLKKKADALSLKFRALLKKIVENKSLMGELMQEAFISMAQATFQAGDFTRFVVENAVKPTVKVKSSTENIAGVKLPLFQYHHDGADAYQLTGLGKGGKQIGECKVKFGKATELLVELASLQTSFITLDEVIKATKRRVNAIEFVIIPKIERTVDYIKSELDELEREEFFRLKKVQDKKKKDKKKAESENKLAREMQNLAVEEGRAVIPESTSVLANDDDQDLLF
PF01813	Hmag_Metazoa	MAMTVIKNQLKGAQKGHSLLKKKSDALTLRFRKILKSIIETKVMMGDAMKAASFSLAEAYFTAGDFSVVVLENVDKAWVKVKSRSDNVAGVRLPVFESYSDGSNAFELTGLSRGGQQVNTCAATFNKAVKLLVTSFVTLDEAIKITNRRVNAIEH
PF01813	Tadh_Metazoa	MSSNDRLPVFPSRMNLTVMKGRLKGAQKGHSLLKKKADALTLRFRAILKKMIDTKLLVGDIMKEANYSLAEAKFAAGDFTQVVLEKVERARTKIRTGKDNVAGVQLPNFEPFSEGVDSNELTGLSRGGQQVTHAREVYAKAVTLLIDLASMQTAFIVLDEAIKVTNRRVNAIEHVIIPRIENTISYITSELDERDREEFYRLKKIQEKKKKLKVAKEEEMKILGVGDEDTKNILEDSKDEDVIF
PF01813	Mbre_ChoanoflagellataCraspedida	MSGSGDKINVFPSRMAQTQMKLRLKGAKKGHSLLKKKADALTLRFRAVLRQIVKNKTLMGEVMRKGAFSLASAQFHAGNFGSTVLQNVNKATMRVRAQKDNVAGVQLPVFEHYTDGTVSNDLTGLARGGQVIQNCKASWQEAVKLLVELASLQTSFVTLDEVIKMTNRRVNAIEHVIIPQIERTLSYIASELDEREREEFYRLKKIQEKKAQIKERKEAAAALAAAQGLCPFPAVLANEDQDEDILF
PF01813	Sros_ChoanoflagellataCraspedida	DRYNVFPSRMSQTQMKTRLKSAKKGHSLLKKKADALTLRFRAILKQIIQNKTLMGEVMREAAFSLAEANFKAGDFSHTVLQNVNRATFMVKAHKDNVAGVQLPIFHPARDGSSGTELTGLSRGGQEIQRCKETWDKAVELLVELASLQTSFVVLDETIKATNRRVNAIEHVIIPRIERTLSYIASELDEREREEFYRLKKIQEKKKEIKDKKEAAALAALGG
PF01813	Clim_Corallochytrea	MPGDKIPIFPTRMALSTMKSRLKGAQKGHSLLKKKADALQIRFRSVLHKIVDNKKAMGDLMRNSAISLAEARFAAGDFSQGIIEQVDKPVVKVRTKKENIAGVIIPSFEHYEEGETGFKLTGLGKGGQAVQKCRDQYIEAIELLIELASLQTAFITLDDAIKATNRRVNAIEYVIIPRIQNTIAYITDELDEQDREEFFRLKKVKQKKAERLARAEEEEAALAAQGDQKVPSSGTGGAYDDPTAGQPSVLDDADNAGQDQDILF
PF01813	Clii_Corallochytrea	MPGDKIPIFPTRMALSTMKSRLKGAQKGHSLLKKKADALQIRFRSVLHKIVDNKKAMGDLMRNSAISLAEARFAAGDFSQGIIEQVDKPVVKVRTKKENIAGIPSFEHYEEGETGFKLTGLGKGGQAVQKCRDQYIEAIELLIELASLQTAFITLDDAIKATNRRVNAIEYVIIPRIQNTIAYITDELDEQDREEFFRL
PF01813	Mlei_Metazoa	MGTGEKINVFPSRMILTVMKVRLKGAQKGHSLLKKKSDALTLKFRATLKKIIENKTVMGDVMKTVYFSLAEAAYAAGDITQTVIQNADKAQNKIKFTKDNVAGVQLTNFTMHTEGSDVYQLTGLGKGGQTVSRCKDTAQKAIKLLVELASLQTSFITLDEAIKITNRRVNGIEYVIIPRYENTIAYIVEELDEREREEFYRL
PF01813	Nspp_Discicristoidea	MSGSTKARLNIFPTRMALTGVKARLKGAKTGYSLLKKKSDALTLKFRAITKKIMENKKLMGSLMQEAAFAFAQVVYVSGDKIGLQVRENAAQATLRVRSKMENVAGVQLPQFESLTEGNDVFELTGLGRGGQQIQSCKKTYKTAVQMLVELASQQTSFVILDEVIKMTNRRVNAIEHVIIPRIENTISYIVSELDEQDREEFFRL
PF01813	Falb_Discicristoidea	SSNARLNVFPTRMALTNMQARLRGARSGHGLLKKKSDALTVKFRIITRKIIESKALMGDILKAAHFSFAQVNLVAPDLGNTIVQSAGQATLKTRAKLDNIAGVQIPQFETFWEGTDTYELTGLGRGGPQIQNSKKAWREASRLLIELASLQTSFLVLDEVIKLTNRRVNAIEHVIIPRIENTVNYIKSELDEQDREEFFRL
PF01813	Amac_FungiBla	MSGNNQRLAIFPTRMALTTMKLRLKGAQTGHSLLKRKSEALTKRFRVILGKIDEAKRKMGKLMQGAAFALAEVTYATGDVAFAVQAAVKQAQTKVRTKQENVSGVLLPAFETYTDPGAGNAFELTGLGRGGQQIQRARDVYTKVVAQLVELASLQTAFVILDEVIKATNRRVNAIEYVIIPRIENTIKYIISELDEQDREEFFRLKKVQGKKKRDREIEDLARAKRMLEMPADGPGAASAEPSTMLKDEEDDDILF
PF01813	Cang_FungiBla	MSGNNQRLAIFPTRMALTTMKLRLKGAQTGHSLLKRKSEALTKRFRAILGKIDEAKRKMGKIMQGAAFSLAEVTYATGDISFAVQSAVRQAQLRVRTKQENVSGTMLPMFELYSEGANAFELTGLGRGGQQIARAKDVYAKAVAQLVELASLQTAFVILDEVIKVTNRRVNAIEFVIIPRVENTIKYITSELDEMDREEFFRLKKVQGKKKRDRDAEEVAKAKRLLEAPESVEEPSNLLAANEDNDILF
PF01813	Rirr_FungiZyg	MSGAGPRINIFPTRMALTTMKTKLKGAQTGHSLLKRKSEALTKRFRAIVQKIDEAKQKMGKVMQTASFSLAEVSYIAGDISYQVQESVKSAQFRVRTKQENVSGVMLPTFESYLEGGNAFELTGLGRGGQQVQKCKETYIKAVETLVELASLQTAFVILDEVIKVTNRRVNAIEHVIIPKIENTIKYITSELDEQDREEFFRL
PF01813	Mver_FungiZyg	MSGANNRLAVFPTRMTLSVMKQKLKGAQTGHSLLKRKSEALTKRFRDIVKKIDDAKRLMGKVMQVASFSLAEVTYITGDIGYQVQESVKNAQFRVRAKQENVSGVMLPVFESYQEGTNANELTGLGRGGQQVQKCKETYIKAVETLVELASLQTAFVILDEVIKLTNRRVNAIEHIIIPRYENTIKHIISELDEQDREEFFRL
PF01813	Mcir_FungiZyg	MSGNNARLNIFPTRMALTNMKLKLKGAQTGHSLLKRKSEALTKRFRGITVKIDELKRKMGQVMQLASFSLAEVQYITGDISYQIQESSKSAQLRVRAKQENVSGVMLPAFEMYNEGGNAFEFTGLGRGGQQIQRAKEVYTKAVETLVELASLQTAFVILDEVIKATNRRVNAIEHVIIPRYENTIKYIISELDEQDREEFFRLKKVQGKKKERAAVEDAVRAKEAADAELVGHETPTFQTANETGQLDILDHEDEDLIF
PF01813	Rory_FungiZyg	MSGNNQKLNIFPTRMALSNMKLKLKGAQTGHSLLKRKSEALTKRFRGITVKIDELKRKMGQVMQLASFSLAEVQYITGDISYQVQEASKFAQLRVRAKQENVSGVMLPAFDMYTEGGNAFEFTGLGRGGQQIQKAKEIYTKAVETLVELASLQTAFVILDEVIKATNRRVNAIEHVIIPRYENTIKYIISELDEQDREEFFRLKKVQSKKKERAAVEDAIRERKANEKEETPVLQAAHETGQLDLLDKEDEDVIF
PF01813	Rall_FungiCry	MSGNNQRIAIFPTRMALTTMKTKLKGAQKGHSLLKRKSDALTARFRIILQKIDEAKRKMGKIMQTASFSLTEVSYSAGDISYLVRENVKTANFKVKTKTDNVSGVQLPMFESYVDGVSAFELTGLGRGGQQVQKCKETFTKSLEILVELASLQTAFVILDEVIKLTNRRVNAIEHVIIPKIDNTIKYISSELDEQDREEFFRLKKVQGKKKKDAKAAEENLTELSKKIETVNILQHEDDSDLLF
PF01813	Bden_FungiChy	MSGAGPKFSIFPTRMALTTMKNRLKGAQTGHSLLKRKSEALTRRFRDILRKIDEAKRKMGKVLQVASFSYAEVKYSTGDIGYQVRESVKTAQLKVKANTENVSGVMLPTFEMVVDGQNSNDLTGLGRGGQQVQKCKDTYQKSVQILIELASLQTAFVILDEVIKVTNRRVNAIEHVIIPKIENTVKFITSELDEQDREEFFRLKKVQGKKKERQAVADAKKAADAKPRDNESSAPSNMLSQYEQDPDIMF
PF01813	Spun_FungiChy	MSGAGPRFAIFPTRMALTTMKNRLKGAHTGHSLLKRKSEALTRRFRDIVKKIDEAKRKMGKIMQVANFSYAEVMYSTGDIGYQVRESVKQAQLKVRAKSENVSGVQLPAFEMYVDGQNGELTGLGRGGQAVQKCKETYKKAIEVLVELASLQTAFVILDEVIKVTNRRVNAIEHVIIPKIENTIKFITSELDEADREEFYRLKKVQGKKKEKLAIETAEREKNQSLGLTSNQAQPSNLLNEYEQDPDVIF
PF01813	Ccor_FungiZyg	MSGNSNRIAIFPTRMALTTMKLKLKGAQTGHSLLKRKSEALTKRFREIVGKIGEAKLKMGKIMQNASFSLAEVTYTTGDISYKVRENVKTAQLRVRTKLDNVSGVFLPKFESYSEGSNAFELTGLGRGGQQVQRCKTTYTSAVESLIELASLQTAFVTLDEVIKLTNRRVNAIEHVIIPRIENTISYIISELDEADREEFFRLKKVQGKKKRDKERDEEILEAKLKAQQELIAQGLITPEAVTAGESTNMLNQDQDEDIIF
PF01813	Gpro_FungiChy	RMNVFPTRMALAAMKLKLKGAHTGHSLLKRKAEALTRRFRDIVKKIDDAKKKMGKVMQVASFSLAEVLYITGDISFQVRESVKSAQYKVKAHSENVSGVMLPVFEGYAEGGNVFELTGLGRGGQQIQKCRDTYRKAIEVLVELASLQTAFVILDEVIKITNRRVNAIEHVIIPKIDNTISYIISELDELDREEFYRLKKVQGKKKQMKDKAEAEASIARLGTNEVNGQPPNVLDQEKDDDVIF
PF01813	Crev_FungiZyg	RDNVFPTRMNLTFTKTRLRGAQIGHSLLKRKSEALTTRFRVILRKIEDAKLKMGKVLQNASFSLAEVAYIAGDISYQVRESAKHATFKVAAKQENVSGVLLPAFEADIQSGSGQFELAGLGRGGQQIQKARLAYTKAVETLVELASLQTAFVILDEVIKLTNRRVNAIEYVIIPRIENTISYINSELDEQDREEFYRLKKIQGKKKERVANAQREAKAKEDLEASEKSSNVVEDEPDVRNLLSEQADEDIIF
PF01813	Umay_FungiDik	SGKGQRESVFPTRQALGSAKTRLKGAQTGHSLLKKKADALTKRFRTITHKIDEAKRKMGRVMQQASFSLAEVQYATGDIGYIVQESVKSASFRVRAKQENVSGVILPAFEADIKDKSNGTQGSGAEFALTGLSRGGQQVSKAREVYTQALKVLVELASLQTAFVILDEVIRMTNRRVNAIEHVIIPRLENTISYIVSELDEADREEFFRLKKVQAKKKEKAEAGDRQRKKQEKDDQDEQEAEQDAQEAQDEQDEQDE
PF01813	Cneo_FungiDik	MSGTGPREAIFPTRMNLTLTKGRLKGAQTGHSLLAKKRDALTTRFRQILRKVDEAKRLMGRVLQLASFSLAEVTYAAGDIGYQVQESVRKANYTVQARQENVSGVVLPAFEGVRSNDASDFNLTGLSRGGQQIQKSRDTYIKAVGTLVELASLQTAFTILDEVIRATNRRVNAIEHVVIPRLENTIKYINSELDEMDREEFFRLKKVQGKKKRDAANAEQSRENENKAFEATGGELHRDEGIGGGVAGGADMLDEGKDEDVIF
PF01813	Cfra_IchthyosporeaIchthyophonida	MGQDRIPIFPTRMALTNMKIRMKGAEKGHSLLKKKADALSLRFRRVYENAKVAAVRVKAKTDNVAGVKLPIFEYQHAGDDVFSLTGLGRGGKNIGECKEAFKKACELLVNLASLQTSFVTLDEVIKATNRRVNAIEYVILPRLQNTIDHIVSELDELEREEFFRLKKVQNKKKELKKAQALAEAEAALLMTVTRVIYKSSNKDNYMD
PF01813	Ttra_Apusozoa	KDIFPVFPTRMALTSMKIRLKSAEKGHSLLKKKADALTLRFRSVATEIKAYKQALGEMMSDSAMSITKARYVAGDFAYLVTENVGSASMKIRTELENVAGVKIPVFDAYEDSGSSDALELTGLGKGGAQIRQCKSKFADALQSLVKLASLQTSFITLDEAIKLTNRRVNAIEHVVIPKIENTISYIITELDEGEREEFFRLKKIQEKKADALESKNAAMAERRELLGLDDDGARP
PF01813	Hnan_ChoanoflagellataAcanthoecidae	MSDGTRINIFPSRMAQTLMKVRLKSAQKGHSLLKKKADALQHKFRRILKEIVDVRTQVMTTALPDALFALAQANFAAGAEFGALVRENIGTARMKVKSDTDNIAGVRLPTFEPMVGSADANELTGLGKGGGAIQDCKRQWEQTVKVLIHLGSLQTSFRTLDEVIKSTKRRVNAIEHVIIPKIERTLEYIKTELDENEREEFFRL
PF01813	Dcos_ChoanoflagellataStephanoecidae	MGDNSRINIFPSRMAQTIMKTRLKSAKQGHSLLKKKSDALQMRFRKILRQIVDTRVKVMKEAMPEAMMALASANFAAGSEFGIVVRQNVSGMARLKVKQEVDNIAGVKLPVFAPVQEGADAYELTGLSKGGSAIQSCKDQWVKCIKVLIVLASLQTSFRTLDETIKQTNRRVNAIEHVIIPKIERTVSYITSELDEAEREEFFRL
PF01813	Pbif_Breviatea	RLPIFPTRMNLGSMKVRLVAANKGHKLLKQKSDALTQRFRQVMTNIRENKGNMGDSFQSSIFSLTQAKYAAGEHITNTIIENTKAAEMKLKMQSENVAGVLLNAFQPYSEGSAKDLSGLSRGGQRINECRQSFQKTLDLLVKLASLQNSFMTLDEVIKITNRRVNAIEYVVAPRIQNTIKYIEGELDELEREEFFRL
PF01871	Acas_Amoebozoa	IECPLFVGWKKSSKDGSDERLRGCKGTHGTLPLHEGLRQYALLSAFDDSRFRPVTEDEVPRLACTVNLLFAFEKCDDCFDWEVGPHGVRIDFYDSRNVQRSATFLPSVAVQFGYTRTQTIERLVEKAGCDEPLTKKLVAKIKCIRFQSSEIHIPYEEYLQHKK
PF01871	Ddis_Amoebozoa	SRSTSSTKATKEMVAYCFDSLIFHFENKPIYKPKFSNESSPLFVTWKIDNKNYDEPILRGCIGTFAEKNLVEGLHKFALTSALKDSRFSAITKKELTKLHCAVSLLVKFETVDSVWDWEIGTHGIWIEFTDPNTNQSSNSTYLPDVIPEQEWTKEEAIRSLIKKAGYNGKVDDNFFSLIKLTRYQSSKDSLSYSEFLEYKK
PF01871	Ppal_Amoebozoa	PLFVTWNIDKYGNGDKELRGCIGTFSPIPLVKGLNEYALTSAFKDTRFKPIPEKDLPKLHCAISLLVNFEQAKDCWDWEVGKHGILIDFKDSRNQSHRGTYLPEVMPEQEWSQREALESLIKKAGYYGKVDDHLFQSIKLTRYQSSKISLSYNQYLQFKEQQNKQQ
PF01871	Bden_FungiChy	CYYCFEVLSAHLDNRQPTPPTFPNTQFPLFVTWSLTRTDELRGCIGNFSAMPLHKGLEEYAIVSALQDTRFNPIRKSELANLSCGVSLLINFESGRNWQDWEIGKHGIRISFENEHGRQQSATYLPEVASEQGWDHKQTIDSLLRKGGFRGVITQKLRDSILLVRYQSSKIKVTYDQYQKH
PF01871	Gpro_FungiChy	VVTDAHCAYCFDVLAARLEGSRKHIEPEFLDDKYPLFVTWHTVRGANQRLRGCIGTFEATKIHKGLEEYALISALRDRRFSPITKDELSELSCGVSLLTNFEPAEDYLDWEVGQHGIWIEFRNEVSGGKTTATYLPEVAEEQGWTKLEAIDSLLRKGGHQGRISEKLRKSIKLTRYRSEKHEITYQEY
PF01871	Spun_FungiChy	MVVTKAHCYYCFDVLVAHFEGRRPCEPEFQNEQYPLFVTWNTIQEDGSHRLRGCIGNFDALPLHSGLKEYALTSSLRDRRFSPVKERELPNLSCGVSLLTEFEDGKDYLDWEIGTHGIWIEFRTDSGSRRSATYLPEVAAEQGWTKLEAIDSLLRKGGHTGKITDKLRKSIQLTRYQSSKTAVTYSDYV
PF01871	Rirr_FungiZyg	ANKMVVGIEHCVYCFDVLVAYLEGRMPLEPEFENNQYPLFVTWNIVNHGQTRLRGCIGNFEPLPLHSGLKEYAITSAIHDRRFSPITIRELPHLTCGVSLLTNFEDAKDYLDWEIGVHGIWIEFVDDHNRRRTATYLPEVTEEQGWTKEEAIDSLLRKGGYNGRITDKIRSRIVLTRYQSAKYVVTYQEYLQHVSENPLKHGIKHEI
PF01871	Nspp_Discicristoidea	YCFDVLVQHHDAAHRVVPPSFANDSFPLFVTWDIERRRGHKELRGCIGNFSAMPLHSGLREYALISALEDRRFNPIAPEEIPALHCGVSLLVAFEDGADYLDWTVGTHGIWIEFVSDDGRKRTATYLPQVAQEQGWTKVQAIDSLLRKGGYRGPIDDAKRRAIKLTRYQSSKCEVSYAEYLAWR
PF01871	Cowc_Filasterea	LSADLCRYCFDTLSNHFSSRHPVAPPSFGNESYPLFVTWNMLNKGHSHLRGCIGTFSARPLHDGLAEFSLRSALKDRRFSPISEKELPHLTCGVSLLINFEDAADYLDWEIGVHGIWIEFVTEGGYKETATYLPEVMPEQGWTKIEAIDSLLRKGGYRAKITEEVRSNIKLTRYQSVKFRMTHPEYLRLR
PF01871	Mcir_FungiZyg	SPLFVTWHKKARDNELQLRGCIGNFNPMPLHTGLTKYALVSALQDRRFSPITLSEIPVLTCAVSLLTDFEIADDYLDWEIGIHGIWIEFVNADGEKETATYLPEVMEEQGWTKQEAIKSLLRKGGYYGPVTEAYCRESIVLTRYQSQKLEQPY
PF01871	Rory_FungiZyg	HLKKKHYPQPHFPNDTYPLFVTWHIESYGHSKLRGCIGNFSPLKLHEGLLKYALISALKDTRFKPITLEELPRLSCAVSLLTDFEQADDYLDWEIGVHGIWIEFIQQDGEKETATYLPEVIKEQGWTKEEAIRSLLRKGGYYGNITKEYCESSIILTRYQSQKKEFSY
PF01871	Apar_IchthyosporeaIchthyophonida	ALAPTVKNKVATPAMCVYCFDVLHSYLHRTTSPPTPDFTNDKFPVFVTWKIQGRKEGDMRLRGCIGTFSAQTLHSGLREYALSSALNDTRFSPIDKTELPRLECSISLLTDFEKGSNYLDWTVGVHGIWIEFTDNYGSKRTATYLPEVMPEQGWTQEQAIDSLLRKGGFKGPITQSVRQNIVLTRYQSQKCSVSYEEYVGHKTKGRALGEPLP
PF01871	Adig_Metazoa	RHRIVTKEMAFYCFDILASHLYRLQEPPWPNFPNDEFPLFVTWKIGHDRRLRGCIGTFTAMRLHKGLKEYTLSSALRDSRFSPVTKEELALLYCSVSVLTNFEENVDCLDWEIGVHGIRIEFYNEKGAHRTATYLPEVAKEQGWNQIQTIDSLLRKGGYKGTINAEVRGSVKVTRYQSEKVTVDYNEYLASKR
PF01871	Nvec_Metazoa	GYKRRIISKDMAFYCFDMLASHLYRVKEPSRPHFTNDSFPLFVTWKIGHDRRLRGCIGTFSTMPLHAGLKEYTLSSALRDSRFAPITKDELANLHCSVSLLTNFEEGVNCVDWEIGVHGIRIEFYNEKGHKRTATYLPEVAKEQGWTQIQTIDSLLRKGGYKAPISPEMRNTVKVTRYQSEKVTVSYNEFMAAKQ
PF01871	Bflo_Metazoa	RRLVVSTEMCCFCFDVLYCHLHSFEQPKVPRFTNDPYPLFVTWKTGRTRRLRGCMGTFTAMNLHGGLREYTLTSALKDSRFAPISRDEMPRLHCSVSLLTNFEDAKDYLDWEIGIHGIRIEFVNEKGSKRTATYLPEVAREQGWDRIQTIDSLLRKGGYKGLITNDVRRSIRLTRYRSEKMTVGYAEYIAHRNNNNHQYKHLANG
PF01871	Xtro_Metazoa	SSLSPGSRKMVVSAEMCCFCFDVLYCHLYGYQPPRTPRFTNDPYPLFVTWKIGRDKRLRGCIGTFSAMNLHSGLREYTLTSALKDSRFPPMTRDELPRLFCSVSLLTNFEDVCDYLDWEVGVHGIRIEFINEKGSKRTATYLPEVAKEQGWDHIQTIDSLLRKGGYKAAISNDFRKTIKLTRYRSEKMTMSYAEYLSHRQHHHFQNGIGHPLPPYNHYS
PF01871	Hmag_Metazoa	RLIVSKDMVYYCFDVLLSHLKQLELPKNKSPKFTNDPYPLFVTWKVGIEKRLRGCIGTFSALKLHDGLKEYSLSSALRDSRFSPVSLEEVPNLHCSVSLLTNFEGNKNYLDWEVGVHGIRIEFFNERGRKLSATYLPEVAQEQNWNQVQTIDSLVKKAGYWNAITEELRRSIKLTRYRSEKMVVSYEEY
PF01871	Ctel_Metazoa	KQKLNNSMPSICCNGTSSVQTNGLPAHDTTTIRPEMCYFCFDVLHCHLHNSDVPKTPSFCNDAFPLFVTWKIGRDKRLRGCIGTFTAMSLHGGLREYSVTSAMKDSRFSPVTKEELPRLHCSVSILTRFEDAQNYLDWEVGRHGIRIEFYNERGSKKTATYLPEVAPEQGWDRVQTIDSLLRKGGFKGAITPDVRNAIKLTRYQSEKLTVGYQDYVNQKASSTNGVITNGYHHNHHVPP
PF01871	Tadh_Metazoa	MCVYCFDVLISYVQRQSEPARPAFTNDAYPLFVTWKTSDERLRGCIGTFSSCNLHSGLRDYALNSAIKDSRFAPIRKEEITDLSCTVSLLTNFEEAADYLDWEVGIHGIRIEFKNEKGHHRSATYLPEVAKEQEWTKIQTIDSLLRKGGYRANISPSFRSSIRTTRYCSQKITLSYNEYLQHQQ
PF01871	Ocar_Metazoa	PLFVSWKLLPGQRLRGCMGTFSALKLHSGLREYAITSSMKDNRFQPIVYEELPKLLCSVSLLTNFEPADHYLDWEIGTHGIRIEFTTERGSRKTATYLPEVAREQGWTHLEAIDSLLKKGGYRDQIDDEVRRSIRLVRYQSQKVMVSYDEYAA
PF01871	Dpul_Metazoa	HLSNLTNGHARNGTVAHPEMGFYCFDVLYSHLHSSEPPKPPRFTNEEYPLFVTWAIGKDKRLRGCIGTFSAMNLHSGLREYAVTSAFKDSRFSPITADELSKLHVSVSILTNFEDAEDHMDWEVGTHGIRIEFHSDRGSRRTATYLPEVATEQGWDRIQTIDSLLRKGGFKGLVTHDVRRNIKLVRYRSEKVSVSWQDYWTH
PF01871	Lgig_Metazoa	NSSASVSNNGPSASPSFHKNGYTVAVPDMVFYCFDVLHSHLHTYEAPKPAFTNDSFPLFVTWKIGRERRLRGCIGTFAAINLHTGLRDTLAMKDSRFVPIAKEEFPKLHCSVSILTKFEEADDYLDWEVGCHGIRIEFLNDKGHKKTATYLPEVATEQGWDRIETIDSLLRKGGFKGTINTEVRKSIRLTRYCSEKLSISYCDYIANRQ
PF01871	Skow_Metazoa	MCFYCFEVLQRHLHSSGEPPPVPKFTNEPYPLFVTWKASGPTNGDKRLRGCIGTFAAVHLHEGLRDYTISSALKDSRFQPISKDELPRLQCSVSLLTNFEEANDHLDWE
PF01871	Ihof_IchthyosporeaIchthyophonida	LGQGLHDYVLNSAFKDHRFPPITKEEFGLLECEVSLLTKFEIAANYHDWTIGQHGIWISFTDQKGVKYTSTYLPQVMSERGWTKDQAIDSLLRKGGFNQPITSAVRNNIILTRYEAEKIKLNYATYLKHK
PF01871	Ihou_IchthyosporeaIchthyophonida	SAFKDHRFPPITKEEFGLLECEVSLLTKFEIAANYHDWTVGVGWTKDQAIDSLLRKGGFNQPITSAVRNNIILTRYEAEKIKLNYATYLKHKN
PF01871	Aque_Metazoa	TNGACHSPQAGSVVSPDMCYYCFDVLLAHLTQSPSPRSPHFSNDEYALFVTWKIGRERRLRGCMGTFSPRKLHRGLSEYALISAVKDSRFDPVVIEELPRLECGISLLTHFEKAENYLDWEIGTHGIQIEFLDGKTLRKATYLPEVPREQGWTKEQTIDSLLRKGGYRHYVTKEYRSSIKLIRYQSEKCVVTYDEYIKTKRRH
PF01871	Colp12	SFIEPEMCLYCFDVLISHLDGKPAPRPNFTNGNFPLFVTWKTQSTRSRSEPALRGCIGTFSAQDLYHGLKDYAITSAVRDSRFQPISKKEVSSLLCSVSLLTNFEEANNHLDWEIGIHGIWIEFTNESGRRQTATYLPEVMPEQGWTKEEAIHSLLRKGGYSREITHAVISTIKLTRYQSEKHTVSYVEYARIR
PF01871	Sarc_IchthyosporeaIchthyophonida	SSPLFVTWKIVHGSDKRLRGCIGTFSKKKLHLKSYALALEDSRFDPVTATELPSLQCTVSLLIDFEKVDDCMDWEVGIHGIWIEFKDHLGMKRTATYLPEVMSEQGWTRMEALESLLRKGGHITLTRYKSEKVS
PF01871	Sros_ChoanoflagellataCraspedida	MATTDMAAYCFGVLESHLHDKDHPEPSFDDGEFPLFVTWKKWHDRYEDWVLRGCIGTFSPTPLHEGLREFALTSALRDTRFDPVSREELATLQCGISLLTNFEDAEHHLDWEVGTHGIWIEFKHESGRKRTATFLPEVMPEQGWSKVEAIDALLRKGGYTSKITEEYRKTVKLTRYKSHKIALSYEEWKTAASSSKSD
PF01871	Cfra_IchthyosporeaIchthyophonida	RVKACLVEVEENLAIIQPEYQQRKSNLYSDMANPLFVTWKTGTSADRHLRGCVGTFAKKKLHDGLRSYALSAAFEDSRFEKITAAELPSLHCTVSILTDFEEKKILGIHGIWIEFSANGRTKTATYLPEVMLEQGWNRTEAIDSLLRKGGYRGRVSKEFRRTIKLTRYKSEKVSMTYADYVSHRHHIRKVHEVPLPEWIQVEA
PF01871	Awhi_IchthyosporeaIchthyophonida	PLFVTWKTEKSGELELRGCLGTFSSQSLHKGLKDFAMSSAFRDTRFSPIETSELPQLHCIISLLTDFEPAKHLKDWNIGVHGVSIKFVDDKGIKRSGTYLPEVASEQGWDHRKTINSLLRKAGYRGGITDAIIDSVKITKYRSQKASLSCRDYIRLK
PF01871	Pgem_IchthyosporeaIchthyophonida	CVFCFDVIRHKLSGTSSLPPKPTFRNDKFPLFVTWKRESYGDLELRGCIGTFSAKELHNGLKEFAVSSAFQDSRFSPIEIHELNDLHCTISLLVDFETAEHSEDWHVGIHGIWIEFTDARGIKRNATYLPEIPQEQGWDKKKTIASLVRKAGYKGVLTNQIQQSIELTRYKSQKCSLSCKDYLLLKEN
PF01871	Ccor_FungiZyg	VVSKYHCKYCFDTLINKLTKDKQPIINEFENNQFPLFVTWNINKGGESHLRGCIGNFGEMDLVEGLKDYALISALQDTRFSPIALEEVPYLSCSVSLLINFQPAKNYLDWKVGKHGIRIEFKNEYGKIKTATYLPEVAKEQGWDQETTIMHLLHKGGYRSEVTDELLDSIKVITYESEKYTLTYQEYMKLKQ
PF01871	Mvib_Filasterea	VTTKEMCYYCFDVLAAELKPGGSVARPEFTNAKYPLFVTWTSSAQARAGERPHLRGCIGNFSAMHLHSGLADYALQSALRDRRFSPIEGTELPHLHCAVSLLTDFEAGNDYLDWEVGKHGIWIEFELNGRKTTATYLPEVMVEQKWTQEEAIESLLRKGGYREAKVSGEMKRAIALTRYQSQKESVSYAEWVSAR
PF01871	Crev_FungiZyg	MATKQHCAYCFSVLIAELQGADSRDIKPDFDVDAKYPLFVTWSKKHGNHSRDNDDDEQLRGCIGNFAAMKLGTGLREYALISALNDSRFTPIRLGEIPELSCSVSLLTDFEDAENYLDWKIGEHGVWIEFKQNGRKKTATFLPEIAKEQGWSKIETIDHLLRKGGYQLTITSEMRESIKLTRYQSKKAHLSYVEY
PF01871	Amac_FungiBla	SPLFVTWDKFGHGRVARLRGCIGNFSPMRLHSGLREYALISALQDRRFAPISLPELPHLQCSVSLLLAFEDAEDYRDWDMGVHGVRIAFDDPHTRTRRSATYLPEVALAQEWDHVATIDSLVRKAGYQGPIDEDLRESLAVTRYQSSKAKATYDEYAAWRR
PF01871	Mlei_Metazoa	VATSDMCTFCFDVLMSHFFKKFDKPTPNFTNESYPLFVTWKIGNKKSLRGCIGTFTSLNLHKGIKEYALTSAMNDSRFNPVSKHEISQLSVSVSLLVGFEDGSDYLDWTVGIHGIKIEFGYGRSTKTATFLPDVAKEQGWTKEETVEALLKKAGVRGPMTQALKDSIKLIRYRSEKVEMDFEEYLTRRKN
PF01871	Mbre_ChoanoflagellataCraspedida	KMDVEAYCAFCFDVLAWKLEQAGQPTPPSSTAGQSCPLFVTWKKWSSKHQEYDLRGCIGTFAAQPLAEGLQTFTCSSAFRDSRFPPIRADELPALQCGVSLLTNFTPGADYLDWEVGRHGIWIEFPLGRDTTTATYLPEVAAEQGWTKEEAIQSLLRKGGHRGPITPELLQAIKLTRYESQKASLNYDDWKRRRATPLRTSNHCPSHPSPP
PF01871	Sdes_IchthyosporeaDermocystida	LRGCIGCFSKIPLHEGLADYACSSAFHDQRFPRIKSSEIQKLHCSVSLLTNFEKRENYLDWEIGTHGIWLEFPDLNGKKTTSTYLPEVAQEQNWTKLEAIQSCLCKGLGREMNVDELLSQVKLTRYQSEKITVTYQEYQKGYQH
PF01871	Nk52_Ichthyosporea	TLSASSQSLAMSTSSVKESMGFYCFAALESSLTGCELGTPTSFGNEKYPLFVSWHKTATPGKRRLRGCIGCFSPLPLHSGLADYAITSSMKDSRFAPVSLKELPKLDCAVSLLTHFEERMDYLDWEVGRHGIWVEFTDRSGRKRTATYLPEVAEEQGWGQMETVVSCICKGLGKEQNVDDILPSAVVTRYQSEKVLVTYEQYSQAKQ
PF01871	Pisp_FungiNeo	SESAVCTKEHCLYCFDALNSYLTGEKLKKPSFPNKKYPLFVTWHLMIRGEEYLRGCIGNFKAMEVHQGLKRYALISALQDSRFEPISKEEFPKLTCAVSLLHDFEEVDDIYDWEVGVHGIWIEFEDIDGEKLTATFLPEVAEEQ
PF01871	Clim_Corallochytrea	TPEMCAACFDFLLHELGRGERPKLNTTVPNEEYALFVTWKKGRDRALRGCIGTFRPLPLHEGLKEYSITAALRDSRFRPVKAEEVHQLEVAISLLHSFEDGENWEDWEVGKHGIWIEFGQPGSTRTATYLPEVMPEQGWTKEEALHSLLRKGGFRGSIDKSVLRGVKLTRYQSAKGSLHYDDY
PF01871	Clii_Corallochytrea	VTPEMCAACFDFLLHELGRGERPKLNTTVPNEEYALFVTWKKGRDRALRGCIGTFRPLPLHEGLKEYSITAALRDSRFRPVKAEEVHQLEVAISLLHSFEDGENWEDWEVGKHGIWIEFGQPGSTRTATYLPEVMPEQGWTKEEALHSLLRKGGFRGSIDKSVLRGVKLTRYQSAKGSLHYDDYAGATRHGKQHSSIAPAP
PF01871	Mver_FungiZyg	LVTKEHCFHCFDVIIAHLESKWKEDVKHPVATFEDGAYPLFVTWSKNGNDEGELVLRGCIGNFSAMPLRTGLTQYALLSAFNDHRFSPIEDEELHALVCGVSLLHSFEDGINYLDWEIGKHGIRIEFVDHRGKRQSSTYLPEVALEHQWTKEHAIRSLVRKGGFQGQVTDTFLLQVKLQRYQSDKLQVPFREYKTHK
PF01871	Umay_FungiDik	EHCYYCFLVIEHKLNPRSTPEPTPPFADDGQEYPLFVTWNILATSSRTTATPRLRGCIGTFEPHALAQGLAEYASISAFKDSRFSPISPSELSHLECGVSLLTDFEECDDHLDWQVGVHGIYIHLPNPALTRKTATYLPDVIPEQGWSKLDAIDSAIRKAGFTGKITADVRNSLSVTRYRSDKVSCTYDQFVAWKQ
PF01871	Hnan_ChoanoflagellataAcanthoecidae	CFCFSTLIDRLGGKAPQFTLPDEFVEMKCPLFVTWKIKDGQHLRGCIGTFGDLNLPLGLEEYAETSALKDGRFNPVQLDEVLTLECGVSLLVQFEDGKDYMDWEVGVHGIRIHFAAQGGQYTATYLPEVAGEQGWAKLEAVDSLIYKSGYKGPVNEALRTSIALQRYQSRKFHATYEEW
PF01871	Cang_FungiBla	MVASKLHCFYCFDVLSAHLYPLFITWSTTPHLTLRGCIGNFSPLPLPAGLRDYALISATQDHRFAPIRARELPTLHVAVSLLVDFEPCAHPFDWTIGTHGIRISFTCPTTGKSLGATFLPEVAKDQMWDHKRTLVQLVKKAGYVGRWERVSQAVKVVRYQSSKATCSYAEYVA
PF01871	Pbif_Breviatea	EIKATKDMCAYCFQVLESIFDKAAKVTPNFENFVCPLFVTLNIDKGDGSEHLRGCIGTFSHQPIHTGLAQYVEHSAFHDHRFSPLKKRELDNLIVCVSLLTNFETAQSWNDWEVGKHGINISFHSYHATFLPEVAAEYEWDHLTTLQHLLQKAGYYGAVNDEVLSQVSVERYQSSKCKLSYQDFVAKK
PF01871	Spom_FungiDik	EYCYYCFEVVAATLEHRKVRDKWNAKSWTRSIPLFVKFASGKGHDKQLRGCIGTFRARPLVTNLTYFSKQAAFCDERFRPISLGELALLECQIDLLVDFEPIDDPLDWEVGIHGVSIKFTANGIRYSSTYLPSVAAEQRWDQEETLESLIHKAGYYGSIRSLQITATRYKSLEIGCTYEEYL
PF01871	Cneo_FungiDik	HPIWAFDVLAAHLRHEAPADPPFHNPHDSYALFVSWHVAKPGRRHVLRGCIGNFLPMPLAEGVKDYALISALKDHRFSPIKVAELPTLLCDVSLLTPFISIADPLDWTPGEHGIHITFTHPTDHTRSYSATYLPHICPEQGWTKEETVLSAISKAGYKGKVKVGDRVWKRLHVKIYGSVKVEASWQ
PF01871	Rall_FungiCry	MTPDHCFYCFEILSNHLNGDSPPTEPQFENSKNTSAFNDSRFSPITVEEISHLSCAVSILDDFEDDLKWDNWDVGIHGIKINYKSHSATYLPEVAHNQGWTKYETIVSLLKKAGYYGHINVKVLASLSLVRYQSRKHEAHYQEWVNSYQ
PF01875	Acas_Amoebozoa	REASHAGSWYTDQGAALSEQLEGWLAAVETSNDSSAPSRALISPHAGYSYSGPTAAWAYRAIDPSHSKRVFVLGPSHHVYLRNCALSTQTHYETPVGDLTLDLEVMAELMATGHFGTMEKDVDEDEHSIEMQLPYLAKIFERHEVKVVPVLVGSLDKQSEELFGGVFARYLDDPENFFVISSDFCHWGKRFSYTFYDASRGAIHDSIQWLDHEGMRVIESQNPQAFHDYRKKYKNTICGRHPIAVLLEAMARSETRFDLNFVRYAQSSKCKTEKDSSVSYAS
PF01875	Apar_IchthyosporeaIchthyophonida	RRATHAGSWYTDSPSKLSQQLTDWLAEASPPTHSPARAIIAPHAGYSYCGSCAGYAYRQIDPSTVKRVFILGPSHHVYLSGCALSQCTEYATPIGNLTLDQQVIIELRKTGKFDDMDPSVDEDEHSIEMHLPYVCHVMKGQDFTIVPILVGALTTAKEKEYGTLLAPYLNDPHTLWVVSSDFCHWGRRFSYTYHDTTKGEIHSSIRHLDHMGMTAIESRDPTQFASYQKQYKNTICGRHPIAVLLNALATLGPQLPGQIKFLNYAQSSKCYTNQDSSVSYAAASFKV
PF01875	Ihof_IchthyosporeaIchthyophonida	RKATHAGSWYSNSPNRLTSQLDSWLADVPSTNHNAVRAIISPHAGYSYCGATAAFAYKQIDPLTVRRVFILGPSHHKYLDGCALSQCNAYDTPLGPLPLDKNVIKELQNTGHFTSMTLQTDEEEHSIEMQLPFIRKIMFGCNITVIPILVGSLSPEKERQYGILLAKYLNDANNLWVVSSDFCHWGKRFNYTYQNPSFNFIFESIQDLDHKGMCAISTGDPDIFLAYQKQYKNTICGRHPIAVLLHALTSLGDRLPGEIKFYHYDQSNKCIRLSDSSVSYAAASLTTN
PF01875	Ihou_IchthyosporeaIchthyophonida	NITVIPILVGSLSPEKERQYGILLAKYLNDANNLWVVSSDFCHWGKRFNYTYQNPSFNSIFESIQDLDHKGMCAISTGDPDIFLAYQKQYKNTICGRHPIAVLLHV
PF01875	Cowc_Filasterea	IVREASHAGSWYDEGGARLESQLDGWLAAANSDADSNHTPARAIIAPHAGYSYSGPTAAFAYKQIIPDNVQRVFILGPSHHVYLKGCALSRCTEYATPLGNLKLDAAIIAELNATQSFEFMTKSVDEEEHSIEMHLPYIRKVFNKNANATIVPILVGALATEKEAVYGKILAPYLANPANIFVVSSDFCHWGSRFNYTYTTSSQVPIHESINILDHQGMALIERLDCDGFAAYLKSTKNTICGRHPIGVLLQAIRAVRTTDTAFQPNLKFVKYAQSSACKTQRDSSVSYASASLRV
PF01875	Colp12	RSASHAGTWYTDQSEALDRQLSGWLSAVPLNHYPAKAIICPHAGYTYSGSTAAYGYKQIDPSTVSRVFVLGPSHHVYLDGCALSPCTRYETPIGALDIDLDVYEELKKTKAFSTFTKAADEAEHSLEMHLPYIRKVFAGKPVSIVPIVVGSISSEKEKVYGQILAPYLDDPRTIFVVSSDFCHWGKRFSYTYYKQEDGEIYESIEALDREGMAHIESLDHEKFTSYLKRTKNTICGRHPIGVLLQAIEAWGKGGSLRFLQYAQ
PF01875	Adig_Metazoa	RRASHSGSWYPSSARELNTKLEGWLSKASPSFRPAKAIIAPHAGYTYCGSCGAHAYKQVDPSRVKRIFILGPSHHKYLPGCALSPLTHYQTPLYNLEVDTTIIEELLSTGEFDKLERDEDESEHSIELHLPYIAKVMESKSDQFKIVPILVGSLNPENEIKYGRLLSKYLARPEFFFVISSDFCHWGKRFKYTPWDRSYNHIYESIEALDRKGMDVIEKLDPQGFSEYLKEYGNTICGRHPIGVLLNAVEILRRMNGVTHPWTFKFVHYSQSNACDHVNSSSVSYAAGVL
PF01875	Nvec_Metazoa	RRATHAGSWYSSHSRDLNSQLDGWLSKVDVNYRPARAIIAPHAGYSYCGSCGAYAYKQVDPTVVKRVFILGPSHHVHLRGCALTKNSIYQTPLYNLEVDKAVNAELMGTGFFDEMSSKTDEDEHSIELHLPYIAKAMESKRGQYTVVPILVGSLSPDKEKKYGKLLSTYLMNPENLFVISSDFCHWGKRFKFYYYDSRYDRIHQSIEALDKKGMDFIERLDPQGFSEYLEKYGNTICGRHPIGVFLNALSALSQLNGMSPSMSFRFLHYSQSNQCEDFDDSSVSYAAGVL
PF01875	Skow_Metazoa	RRATHAGSWYTRSGKDLSAELDQWLQGAPLDSHYSPARAIIAPHAGYAYCGKCGAHAYKQVDPTNVKKVFILGPSHHVRLSGCALSRTVTYDTPLYNLPIDTQVYGELMSTGQFEKMSIETDEDEHSIEMHLPYVAKVMESKRDQFTIVPILVGALSTDKEQKYGRILAKYLEDPHNLFVISSDFCHWGERFHYTYYDESCGEIYKSIDVLDHKGMNHIENLDPSGFSKYLKMYGNTICGRHPIGVFLNAVGVLREKNGQNMSFKFLNYSQSQQCRNPRESSVSYAAGSLAM
PF01875	Bflo_Metazoa	SSRMSVRRATHAGSWYTSSVQDLNDQLEGWLAAAQPTLSPARAIIAPHAGYAYCGACGAHAYRQVDPRNIKRVFILGPSHHVRLSGCAVTATQVYHTPLYDLTIDTAINQELLQTGQFEVMDINTDEDEHSIEMHLPYVAKVMESKKGQFTVVPVLVGGLSVDQEAKYGRLFSKFLADPQNLFVISSDFCHWGQRFKYVYYDRSQGDIYQSIEALDRMGMDIIEHMNPAEFTSYLRKYENTICGRHPIAVLLNAVKYLKTANSHTLSLRFLNYAQSSRCRRKEDSSVSYAAAALVVH
PF01875	Ctel_Metazoa	SNMSRVRKASHAGSWYTGDGEGLNKELGKWLSKAPAGGEHARAIIAPHAGYSYCGACSAHAYKQIDPSRVHRVFILGPSHHVRLNGCAITAAEKYQTPLYDLTIDAQISEELYSTSMFEKMSNQTDEDEHSIEMHLPYVAKVMQSRQGHFTVIPVLVGSLNPDKEAAYGRIFSRYLADPNNLFVISSDFCHWGQRFRYTYYDKSKGDIYKSIEHLDRMGMNLIEEMDPPAFTAYLEQYGNTICGRHPIGVLLNSIKCLRESRGNGHRYSLHFLKYAQSSQCLTNKDSSVSYASAALTI
PF01875	Xtro_Metazoa	MSNRALCREASHAGSWYTASGSQLSAQLDGWLSQAQTSKRPARAIIAPHAGYTYCGSCAAHAYKQVDPSVTRRVFILGPSHHVALSRCALSTVDIYRTPLYDLHIDQKVYGDLWKTGMFERMSLQTDEDEHSIEMHLPYTAKTMESHKDDLTIVPVLVGALSESKEQEFGKLFSKYLADPTNLFVISSDFCHWGQRFRYTYYDESQGEIYRSIENLDKMGMGIIEQLDPVQFSNYLKKYHNTICGRHPIGVLLNAATELQKNGVNMSFSFLNYAQSSQCRSWQDSSVSYAAGALVVH
PF01875	Lgig_Metazoa	RRATHSGSWYSDSGDELRNQLDGWLSKPKSLSHPAKAIIAPHAGYYYCGACGAHAYKHIDPSRVKRVFILGPSHHVRLSGCALSSAEKYVTPLYDLHIDSKVYEELYSTNSFEVMSMNIDEDEHSIEMHLPYIAKVMESHKDEFTIIPILVGSLSPEKEEHYGKILSRYLADPESLFIISSDFCHWGRRFRYTDYDQSQGEVWQSIEALDKKAMDIIEKMDPQGFTQYLVDYQNTICGRHPIGVLLHVNSIRKNGNGLKLSFKFTKYSQSSKCKSTQDSSVSYAAGCLMFH
PF01875	Hmag_Metazoa	QLNKQLEQWLSEVNVKSTPARALISPHAGYAYCGACAAYAYKQINPMTIKRIFILGPSHHVALPGCAVTQTTSYETPLYNLKIDNLINNELLGTGKFDIMSKETDENEHSIEMQLPFIAKVMESNKDNFTVVPILVGSTSHEQERLYGVIFSKYLKNPENLFVISSDFCHWGKRFRFTPYDKSKGEIYESIEDLDKMGMKYIEQLDTNSFYKYLEKFSNTICGRHPIGILLNAVNEVRSADASFKFHYYSQSSKCRRFEDSSVSYAAGTLT
PF01875	Tadh_Metazoa	RQATHAGSWYSSSGTELSKQLGGWLSKVANGNTPAKAIIAPHAGYAYCGACAAYAYKQIDPRGIKRIFILGPSHHYYLTKCAISMTSQCNTPLYPLQVDTEINNQLLKTGKFDKMSKSVDEDEHSIEMHLPYIAQVMSSRSPDSFTIVPILVGALGYREELMYGEIFSQYLVDPENLFVISSDFCHWGKRFRFTYYEKSHKHIFSSIEALDRKGMDLIEQLDPAGFREYLDKYQNTICGRHPIGVLLQAIDAVRKKQRSNMKMRFLNYAQSSQCLSANDSSVSYAAGVFNL
PF01875	Ocar_Metazoa	YSGPCAAYAYKQVDPSKIKTVFILGPSHHAYLPGCALSRTTTYDTPLYPLPIDQQIYTELKATGAFETMTLDVDESEHSIEMHLPYIAKVMQSRKNAFTIVPVLVGALNVDGETKYGSLFSKYLLDPANLFVISSDFCHWGKRFKFTHYDKTYKHIYQSIEALDRQGMDLIASRDFAEYLKKFKNTICGRHPISVLLRAVQALKESTQVQISFLKYAQSSQVTDMGDSSVSYASAAL
PF01875	Aque_Metazoa	RKASHAGSWYSGSGDKLTSQLEEWLGKATSSGAKHAPARAIIAPHAGYSYSGPCAAYAYNQIIPAGIKRVFILGPSHHKYMPDCALSACSHYETPLYNLEIDREIYHSLYSTGKFSQMDVRTDEDEHSIEMHLPYIAKVMESKRGSFTIVPILVGALKPDKEAEYGQLLHKYLLDEQNLFVISSDFCHWGKRFQFTYYDKEHGPIHSSIEALDRMGMSLIEALDTKGFQKYLQTYRNTICGRHPIGVLLNANAAQGEKSFVLKFTQYAQSNRCTAASDSSVSYASASVVV
PF01875	Nk52_Ichthyosporea	RRAAHAGSWYEGHGKSLNVMLERWLEAPTPSMAPARAIISPHAGYSFCGKCAAFSYKQIVSKDVKRVFILGPSHHVYLDGCAVSRCSKYETPLGDLTIDKQTNKELLKNGNFSEMEVGVDEDEHSIEMQLPFIYKVMEENPSYTIVPVLVGSIGKAKEQLYGKIFAKYLSDPANLFVISSDFCHWGKRFRFTAYDKSKGDIFQSIEHMDRMGMKFIENLDPSGFYDYLKECGNTICGRHPIAVLLNAIDEIRKSSELGSSFKSPQVKFLSYSQSSQVVSPSDSSVSYAAAALVTQ
PF01875	Sdes_IchthyosporeaDermocystida	RCASHANSWYSSSKSELTQQLSEWLNSVDSKFSPAKAIISPHAGYSYSGPVAAHAYKQIDPKSTLRIFILGPSHHFYLPGCALSQCSSYQTPLGDLKIDQEVCAELRKTGHFSDMPIQVDEDEHSIEMQLPYISHIMQSNQDFTLVPILVGALSESKEKLYGDILSRYLFTAGNVFVISSDFCHWGSRFQYTYYDKKCGRIFESIQFLDRLGMDVIENLDAQGFLDYMEKYENTICGHHPICIFLHAVN
PF01875	Nspp_Discicristoidea	RAASHADSWYTGDAGRLAQQLNGWLERVAPDEVAYDQPARAIIAPHAGYSYSGPTAAHAYKHVDASQCKRVFLLGPSHHHYLAGCALSRCVSYETPFGNLVIDKDAVQALHATGDFEWMSLDVDEAEHSIEMHLPYLYHVMRNRTEPYTVVPILVGSLSKQAEADYGRLLQPYLADPANLFIVSSDFCHWGRRFSYTHHDKAHGAIHQSIEALDREGMALIERLDADGFYEYLKAKRNTICGRHPIAVLLRAVEHWQRADGGVRPAIKFTHYAQSSRVVDAGDSSVSYASA
PF01875	Bden_FungiChy	RKASHAGSWYSASQEQLSSQLDSWISTADITPNPNVRAIIAPHAGYSYSGPAAAWAYGAIDSHQIKRVFILGPSHHVYIGGCALSPCTIYKTPLGDLTIDTDVVASLKATGQFETLSIQADEDEHSVEMHLPYLYKIMSKKTTPYTIVPILVGASRSSDQHNYATIFAPYLADSTNLFIVSSDFCHWGPNFGYTYQFDPSLQIHASIEKLDREAMRVIETGNSKDFEAYLKRTKNTICGRNPIGVLLHALECLENMGKKVDIKFTHYAQSSRALTKRDNSVSYASAHVTL
PF01875	Gpro_FungiChy	MIRRATHAGSWYSKNRQKLDKELQGWLDDVPRTVPNHVGVEIQLPINTARAIIVPHAGYSYSGPTAAYGFGLVDTSVIKRVFILGPSHHFYLDGCALSQCAEYETPLGNLVIDAEMCRELEATRSFSSMTVSVDEDEHSIEMQLPYIVKIMNRSPTSYTIIPVLVGAISNAKEAHYGEIFSKYLADPTNLFVISSDFCHWGSRFSYTQKHHTSTRDTPIYQSIEALDREGMDLIERLDPAAFATYLKRTRNTICGRHPIAVLLNAVTKAFPALVPKPADGEDSSPTLKFVRYAQSSQVRNERESSVSYASGYLNV
PF01875	Spun_FungiChy	VIRDASHAGSWYSGSGKRLSSELNGWLAQVPTSGSDGSLSNFPLPITKCRAIIAPHAGYSYSGPAAAYAYKCVDVEPIKRVFVLGPSHHFYLDGCALSQCDEYETPLGNLKLDKDVIAKLKATGEFSLMSQQVDEDEHSIEMHIPYVYKIFEKKQEPYTIVPILVGAISAEKEAKFGRLLASYLADSQNLFVVSSDFCHWGSRFSYTYQGNGNRDTPIYQCIETLDREGMEIIETIDPKSFTAYLKKTRNTICGRHPIGVLLNAAAILINGQTEDEDTSGKRKKQKSDGADNIAGRAANGNGTVKKAEIKFVHYAQSSKVTSTRDSSVSYASAYL
PF01875	Sros_ChoanoflagellataCraspedida	HTKMSAHRRATHAGSWYTDDGKELSGQLDAWLGKVGEAIMPGARAIIAPHAGYSYSGPTAAYAYKQIVPDNVRRVFVLGPSHHVYIQGCALTSTTTYDTPIGNLKIDRDTNKDLEATGQFEHMDIQTDEDEHSIEMHLPYVAKVMEGKDFTVVPVLVGALDSKLEQEYGKIFAPYLEDPSNLFVISSDFCHWGRRFGYTYVPPGHDAIYKGIEHLDKQGMDIIEKQDAKGFRAYLQECENTICGRNPISILLNVCCAVLRAALQVLKDRQKEVKFLHYAQSNPCKSTRDSSVSYASAAVLIS
PF01875	Mbre_ChoanoflagellataCraspedida	AGAGKTCRAASHAGSWYSSDGAALNQQLTQWLEAAGPAQLSNVRGIIGPHAGYSYSGSTAAYAYREMQAVAGNCKRVFLLGPSHHVYLDNCALPSVQTYETPLGNIELDLDVVEELAATNRFRSMTREVDEDEHSLEMHLPYIYKAMEGHAFKLVPIMVGALSQAGEQEFGQILAPYVRDPNNFFVVSSDFCHWGSRFSYTPIKRGYEDKIHEGIESMDREGMHIIESLDAPRFARYLKETKNTICGRHPIAVLMNVCP
PF01875	Ccor_FungiZyg	TIIRQASHAGSWYEKRSTVLDSQMKNWLSKVFKSTPDQDVKIPITNSKAFIVPHAGYSYSGPAAAFSYQSIDIEPIKRVFILGPSHHFYLPGCALTKCDEYETPLGNLIIDKDIINELSETGKFDKLSIDADEDEHSIEMQLPYVYKVFESKIDEVKIVPILVGGLDTDGERDYGKLLSKYLKDPANLFLISSDFCHWGSRFRYTFYSDKTPPSKSPSNVRNTDKFTIPIHQSIENLDREGMEKIETLSLDQFATYLSKTKNTICGRHPIGVLLGMDKAPYLKFIHYSQSSQVTDPSDSSVSYAAAYL
PF01875	Mver_FungiZyg	VRDATHAGSWYTAHRKELDKQIAGWLTKAGESTTDGDPLPIDGLRAIIAPHAGYTYSGPAAGYAYKCIQPEKIKRVFILGPSHHIHLSGCALSKCSEYATPLGNLTIDKSINAELIKTGHFQEMSLETDEHEHSIEMHLPYVYKVFENHVEDVTVIPILVGGLSEAKETVYGKLLAPYLDNPENLFIISSDFCHWGTRFDYTYYTDEHGNVTQSLHPKGQRHTHASSSTSSVVTGNQKIFESIRQLDHEGMARIEERSHRSFAQYLSRTHNTICGRHPIGVLLAAVEALGKEEHRIQFVHYAQSSSVLKTTESSVSYASAFLQRH
PF01875	Rirr_FungiZyg	MSRSAYHAGSWYSEQGPRLNKELTQWLDEVPPTTVDGVPIPVPGARAIIAPHAGYSYSGPAAAFAYKSINPDFVKRVFILGPSHHVRFSXCALSQCPQYETPLGNLILDTEIIEELKQTGHFEIMSQDIDEEEHSIEMHLPYTYKILESKIDSIKIVPVLVGSLTADKEMFYGKLFAPYLADPSNLFIISSDFCHWGHRFSYTYYSASPDSDGIYLSRRSDTSLTTPIYKSIENLDRKGMDIIEKINHKEFTSYLAKTKNTICGRHPIGVLLCAINALPNHNNNKMIQLL
PF01875	Crev_FungiZyg	VVRSATHAGSWYSGSGKDLDQELKGWLDEVPKEMTEVEPAGGLCKVPVKGARAIIGPHAGFSYSGPNAAYGYQCINTENIKRVFLLGPSHHAYLEKCALSRCTEYETPLGNIQVDREMLDELQSKGDWDLMSLKVDEDEHSLEMHLPYIYKVFEQHINEIKLVPILVGNLRFGKEHKYGEILAPYLADKQNFFVISSDFCHWGSRFGYTLYKESDNSRAVMLSRRSDRPAGVPVWQSIERLDFAGMEAIAHIDHARFKQYLDETENTICGRHPIGVLLAAVNALYPIGEQGSESPRLRFVKYDQSNRV
PF01875	Ddis_Amoebozoa	RNCTHAGSWYLDNARKLEKQLSDWLSEASRQNQNVKSIIAPHAGYSYSGRAAAYAYINLIPENYKRVFILGPSHHVYMKTCGLTKLDTWETPIGNLKVDKDTTNKLFDTGSFIWNTKSVDEDEHSLELQLPYIAKVAEKRLLELSIVPIMVGSLSIDLEELYGKILAPYFDDPENFFVISSDFCHWGERFGYTRYENKEVPIYKYIEELDRKGMEIIESGDPVQFSKYLKETKNTICGRCPIAVMLWITKNSQFKYNISSLYYEQSSKVIKSSDSSVSYGVLSFT
PF01875	Ppal_Amoebozoa	ATIRSCTHAGSWYSRNASELSKQLDNWLGETKSIGENTRAIIVPHAGYSYSGRAASRGYINLDASKYKRIFILGPSHHVYMKTCGLTKLTHFETPIGNLEVDTEVIKKLDDTSIFTWTTKDVDEDEHSIELHLPYVAKMIQDKKIKIVPIMVGSLSKDTEEQYGKVLAPYFDDPENFFVISSDFCHWGKRFGYTHYNQSAGPIHKSIEELDRTGMSMIETGDPLQFSTYLKETKNTICGRNPIAVMLWTAKNSRNKHSIKSLHYEQSSQCMNMNDSSVSYGVLAI
PF01875	Ppol_Amoebozoa	RSCTHPISWYLPHQDSLAVELNNGLSIKSSHAGYRYSGPSAAHGYKALNPNRKQIFVLGPSHHEYFTKCGLSKLAEYETPIGNLIVDRVLTDELFKTGEFDFLDKQVEEAEHSLEMHLPYPVSVEKLAEEEIIPIMVGSLSKDSEELYGKILARYLSQEEVAFVISSDFCHWGKRFSYTPYNSDLGPIHKSIEEMDKEGMQLIASGDPLAFSGYLKRTKNTICGRHPISVFMWAAYYSKVNHKPLVINPTHYEQSSQC
PF01875	Awhi_IchthyosporeaIchthyophonida	MAKRKASHSGSWYSDKASELEIKIDKWLGDASIPSPTKTDKTRAIISPHAGYAYCGKTAAHGFKSIEPVGLARIFILGPSHHFYLKGCALSMAKRYQTPFGDLELDREIIDELHDTGEFDQMSTETDENEHSIEMQLPFIYHIMRSQKCTIVPVLVGSLNTDNEKKYGKIFSKYMNDEKNFFVISSDFCHWGSRFRYTHVEENFSSIYASIEYVDKLGMKTIESLQSKAYHEYQNKFGNTICGRHPIAVFLHMVEHYNMDDCKDLKFNFLDYKQSQKCKTLRCSSVSYASG
PF01875	Pgem_IchthyosporeaIchthyophonida	MTQRCASHAGSWYSDDGKRLGGQLQNWLDKSKNETNEYTEQNTRAIISPHAGYVYSGKTAAYGFNVINRSKITRAKTYETPFGNINIDLEIIDELQQTGEFEEMTKTTDEDEHSIEMQLPYIYHVMKGQPFTLVPILVGALTVSNEKKYGKLLAKYLTDNQNFFVISSDFCHWGRRFNYTFHKKELKHISSSIDWVDRKGMEAIETLNPEVYHKYQKAYKNTICGRHPIAVLINMVDHISKSQVLYRIEFLDYSKSNECNNMDDSSVSYVSGVL
PF01875	Mcir_FungiZyg	RSATHAGSWYTSDKTRLNEELEFYLDKAVKKSQEKLPIKGTRAIIGPHAGFRYSGPTAGFAYKAVDTSNIKRVFLLGPSHHAYIDGCSLSKCSSYETPFGSIKLNREGKLGFTHVIDELHETGKFRWMSQSVDEDEHSLEMHLPFTYKIFEDKIDDISLIPILVGSISATKEKMYGQLLAKYLQDPQNLFIISSDFCHWGSRFHYTYYTKSDKAGEKPLELGSSNKNQMERPIYESIQDLDIQGIDILESLSFDKFQAYLADTQNTICGRHPIAVLMAALEALRDKKEFSKQTLKCLHYDQSSQCKKYTDSSVSYASIY
PF01875	Rory_FungiZyg	ASHAGSWYTNDKKALDKELNLYIKKSVEEMTADGLQLPIKHVKAIIAPHAGIRYSGPTSAYAYQCFETKRVFILGPSHVCATRECLLPNYDTYETPLGNLPVDWSVIEDLHKTGLFGLADSEDEINEHSIEMHLPFIYKAFEKTQKHCLSIVPIIVGSPTEAKKKTYAKLLVPYLKDPETLFIISSDFCHWGRRFRYTYYPIYESIQALDHQGIKAIESLSFDQFENYLNETDNTICGRNPIGVLLACLEEMKGDRSARCLKYAQSSKCRTLEDSSVSYAS
PF01875	Umay_FungiDik	RKATHAGSWYTDDPRELDECLTEWLSDVQPDNLLSPLSVCSDSSCSSSSSESLALPISSNRAIIGPHAGYSYSGPAAAYAYRTIDTSAIKTVFILGPSHHVYLDGCAVSACSSYETPLGNLPINRSVTHELLSTGRFSTMSKTEDEDEHSIEMHLPYIYKVFKGTGIQIVPILVGAINTARENEFGKLLAKYLNDPENFFVVSSDFCHWGSRFRYTYYKPCGSNIAMNLTSRSSRSMFEGKPIHQSIRELDEAGILAITYPWSRDRQKTAEDARLAFAKYLSETKNTVCGRHPIGVLLAALAELERRGQKTECRFTRYEQSSQCTTPQESSVSYASAF
PF01875	Mvib_Filasterea	GPTSAYAYKQIDTDAVKRVFLLGPSHHVHLDTCALTRCSSYATPLGPLVVDRDVVNELKGTGEFGEMSRQTDEDEHSIELHLPFVKHLFQTRTDVRIIPILVGTLSISHEQTIARLLSRFFTQSDSLFVVSSDFCHWGKRFRFTYQNLSFPTISDAIEDLDRQGMNAIEKLSRSEFQLYLTRTHNTICGRNPILLLLTLCELSLADTDTSLKFIRYAQSSKVISEGESSVSYASAALVLN
PF01875	Clim_Corallochytrea	RPADKAGSWYSHAPSTLDEELTGWLKDVSEHDMHMPAKAIISPHAGYFYSGHVAAFCFKQIDATKTKRIFILGPSHHVYVDGAGISPFKEYETPLGNLKLDTEIMEELLKQKHFTPISGSTDTDEHSIEMQLPYLRKVMGDHKCKIVPIMIGSVSTAKERSIGQTLAKYWADPGTVFVISSDFCHWGPRFRYTPYDEALGERGIHKSIENMDREGMRLIESKDLDSFKQYLEDSQNTICGRHPIAVLLAIVEAAKAKEHCDIKFLKYAQSNAVTNKRDSSVSYAAASLVL
PF01875	Clii_Corallochytrea	CRPADKAGSWYSHAPSTLDEELTGWLKDVSEHDMHMPAKAIISPHAGYFYSGHVAAFCFKQIDATKTKRIFILGPSHHVYVDGAGISPFKEYETPLGNLKLDTEIMEELLKQKHFTPISGSTDTDEHSIEMQLPYLRKVMGDHKCKIVPIMVGSVSTAKERSIGQTLAKYWADPGTVFVISSDFCHWGPRFRYTPYDEALGERGIHKSIENMDREGMRLIESKDLDSFKQYLEDSQNTICGRHPIAVLLAIVEAAKAKEHCDIKFLKYAQSNAVTNKRDSSVSYAAASLVL
PF01875	Cfra_IchthyosporeaIchthyophonida	SKLDSLLTGWLNSVTSKQTPARVIISPHAGYSYCGETAAHAYRQINPETTKRVFILGPSHRAYLDGCALPEFTKYDTPLGAISHDIEALDVLRGTGEFSVMNETTDSAEHSIEMQLPYLQKVMQGRDYKIVPILVGQLHPNKAKMYGELLTSHFLDPGTICIVSTDFCHWGDRFDFQPVDKSFKTIYEGITAMDRAGMYLIEKKDAEGFEKYLHDTENTICGRYPLQIMLHAINRMEANVQSVQVNMRFLHYSQSNNVTDIKGSSVSYAAGAATYS
PF01875	Sarc_IchthyosporeaIchthyophonida	RRATHAGSWYSKDARELNSQLSAWLDAVAEHHTPARIIIAPHAGYTYCGDTAAYAYAQIDPSTTKRVFILGPSHRAYFDCCALPVFEEYATPLGNITLDTEVLQELRASGDFKVMSQKVDEVEHSIEMQLPYLQKIMKGQQYTVIPVLVGQIDPTQASHYGQLLATYLTDPATVCIVSTDFCHWGAHFDHRPVDKKYAEIHLSIEATDRLGMTLIEHKDTQGFEDYLHRTGNTICGRYPLQVMLHAVSALERSSDPVEVRVKFLAYSQSSKVETRSDSSVSYAAGS
PF01875	Hnan_ChoanoflagellataAcanthoecidae	RQATHAGSWYSADDEILAGQLDGWMDDVDVDPEIGVPIAVIAPHAGYSYSGPSAAFAYRYVKPEGITRVFLLGPSHKYYLRKCALSTFSRYATPLGAVDVDVGCIDKLAASGLFETIPEDKEVSEHSLEMHVPYIQRVMGGQPFKLVPMLVGSLELAEEQQVAELLIPYLDDPQNLFIVSSDFCHWGQRFDFVHHKKTDGPIWKSIEQLDRQGMGLIEAIDADGFKAYLDKTQNTICGRNPISLLLRTLKTKSAIPRSIKFTTYAQSSQCVSVGDSSVSYASAII
PF01875	Pisp_FungiNeo	HAGYTYCGQVMAHSYKYINPENIKRVFIFGPSHRVYIRGCALPQFSVYECPLGDMEVDTEICEELEKTELFTKLTKNGEEQEHSIEMELPFISWAMGNQPFKIIPIVFGVFSQKLEEKYIEIFKPYLEQPDTFFVISSDFCHWGERFDYTYLPPVDKSLSESKKLVIADRIEMLDKEAMEIIETGDSEAFEDYLERTDNTICGRTGIKLLLSLFEKANITPSIKFLKYGQSNRVVSKKDGSVSYATAIINI
PF01875	Mlei_Metazoa	RRATHAGDWYSGSRNQLDGELTKWLSHAETPVTSARAIISPHAGLVYCGQTGAHGFKSINPATTRRIIVLGPSHKKYLSGCALSKCSKFETPLYDLVTDSETVAQLYKSELFTDFDVYDDENEHSLEMQYPYIAKVMQGYKDNFKIVSIIVGDVSLDHAKKYAKVLEPLLADPHTVFVVSSDFCHWGSRFSYCNVNGETNIPIWQAITNLDKLGMDTIESLNSVAFQSYLSKTSNTICGRRPILLLLATVEEHSARNPNSKSKFSFLHYSQSSKCMRPSDSSVSYASGVLTI
PF01875	Cneo_FungiDik	REATHAGSWYTSSRSGLRNQLSQNLSAVKPISTLDYDPPVSNAKAIIAPHAGYSYSGPAAAWAYAAVPTEKIKRVFLLGPSHHAYLPGVALSKFEAYETPLGDIPLDIDTIDELRATGIFSDMKSSTDEDEHSLEMHLPYIRLIFQGRDDLKLVPILVGHPSASTSVKLSEALAKYWQDDETFFVISSDFCHWGSRFSCTPYYPNVPPLANPVPPVKSSTSVTSSTLTQPLELVKKFSSASSNPDVPIWKSIEYMDHEGMDLLRKPGEEGAVEKWHGYLDRTKNTICGRNPITVLLNLVQLVYKDQPVKPEFTFVRYEQSSRCVTGKDSSVSYVSGVL
PF01875	Amac_FungiBla	RRATHARSWYTDDAADLAAQLDEWLLATATAPGWPHESALPNEVPDAPGSRSPPPTRGQPVRGARLVIAPHAGYSYSGATAAWSYAALDLTAARRVYVLGPAHHIYLRGAALSSCGTIATPLGNLHVDRAAVRRLADSGHFTMLSVQDDEDEHSLEMQYPYLAHLNPDLAIVPILVGQLSSDQERVYGSLIADVLDHDPHAVVVISSDFCHFGSRFKYQYYTPSIHESIEALDRRAIHLIERLDADGFRAYLAETKNTICGRNPIAIALAALRDLASRGDLPVVRLLCYAQSSKVVRVNESSVSYVAAY
PF01875	Cang_FungiBla	SDNGITRLATHAGSWYLDDAAELDKQLSDFLAAAKVAKPTKNARILIAPHAGYSYSGATAAHAYAHWDISSLDRVIVLGPSHHVPLSGCALSRCTQIATPLGNLPGDMDTTHRLATSYGGHFTWMSKSVDEAEHSLEMHFPYIAKVFKDASRPLPLVTQILVGDLTPELDRVYGDLIARELADPAVGLVVSSDFCHWGQRFRFTHYTPTPTALCDCSHPRAHHHHHDAGHHANCADPASVLAARNAVPIHQSIEALDRAGMHIIERLDLPAWIAYLNESKNTVCGRNPIRLALVALNDLYEASLELAAAFVKYAQSSRVAQLKDSSVSYASA
PF01875	Rall_FungiCry	NDRKVRKATHAGTWYEDNSARLNDKVLTFIDNVVAEIDQNRKLKALIVPHAGLKFSGQTAAYSYNHLLQKINEISKIFVLGPSHHSYLEKPAVSTVDVYETPLGNIEIDTKIAHELISSGAFSKLPKDVDEDEHSIEMQLPFIAHILNSVSCKVSLIPILIGQMNKVTLHSTVKTLLPYFADTDTVFIISSDFCHYGPRFSYTPFSNSKTPIYSEIEQLDNDAINMILDMDLKSFEMYLNQTGNTICGRHAIRVLLSILSEFKDEFSGTLLHYSQSNKAVSGTDSSVSYAAIAF
PF01875	Pbif_Breviatea	VREASHAGSWYSGSKDELKHQLAGWLSSAKQSAVPLSPNATVKAVVCPHAGYRFCGPTAAHAYQFLDAQTLQENTSPIVFLLGPSHFKRLSGFALPHHQTESYAVPGGKINIHKEIVQALDQTGLFSHLSLEEEETEHSLEMQLPFIHHQLGDRALLIPILVGQTTAKQEAELGNALRAYFLRNDVFFVISSDFCHWGARFGYAPHTKGASSPIYKQIEELDRQGVDAISTLQPDTFQNYLEETQNTICGRHAIGVLLNTLQPPQSYNVHLAHYSQSSQARDLHDSSVSYAA
PF01902	Acas_Amoebozoa	MEVVALVSGGKDSCMSMLECVRVGHRIVALANLLPPNDTMGTDELDSFMFQTVGHTVLQSYAQCMGLPLFRHTIRGKALNQDLHYAKTQEDEVESLYVLLKEVKKRFPNVQGVASGAILSDYQRFRVENVCERLGLVSLAYLWQRDQKELLQEMTEVPIDAVLVKVKPIRQLFKVCRSLHYNFALHPCGEGGEYETLTLDCPLFRYKIVLDETEVVIHSDDQFAQVGYFQIAKHHLEPK
PF01902	Ddis_Amoebozoa	VEIVGLISGGKDSIYNLIECVRNGHKIVALANLKPPKTNSSEELDSFMYQTVGNNLIEIIAKECLELPLYQIEINGTAISRETDTYNEELEVNSKDEVEDLHTLLKLVKESHPNIKGVSCGAILSTYQRIRVENCCSRLNLTSYSYLWNRNQDELLREMIDCKIEAIIIKVASMGLVAEKHLLKSITQLYPTLYSLNQKFGVHICGEGGEYESIVIDCPLYKKRINIDQYQTIIHSDDAFSQVAYASISKYSTTEKSTQQIIQDSIYLNSNYL
PF01902	Ppal_Amoebozoa	MRLVGLISGGKDSIYNLLECVRNGHTIVALAHLVPPVSDHEEIDSYMYQTVGFNVIEAIADALQLPLTQRTIVGKPKSQDEIYRITDNDEVEDLYQLLADVKSKHPDVQGVASGAILSTYQRIRVENVSSRLGLTSYCYLWKRDQDELLGDMIESKMNAILIKVASMGLEPKKHLLKTIEELYPALRKLNQLYGVNICGEGGEYESLVLDCPLFKKRIQLDETNMKIHADDAFAQVAFISIVKFSLVEK
PF01902	Ppol_Amoebozoa	MKVVGLVSGGKDSCFNLMQCMKYGHEIVVLANLRPSGSYDELDSYMYQTVGYQLISALAECLTLPLVQRCITGAPKLQSMSYVATGQDEVEDLFLLLQEVKKFPEVGAVSCGAILSNYQRLRVESVCSRLGLVSLAYLWHQDQMELLQSMVSYDIHAILVKVASYGLTPEKHLGKPIKQLFPVCKSLNQYELNVCGEGGEYESFVLDCPLFKKRIVMDQTETIIHSNDAFATVAFLRIQKWHLEDK
PF01902	Spun_FungiChy	MKVVALISGGKDSCFNMMHCVANGHEIVALANLKPAAATGKDELDSYMYQTVGHDAIELYRDCMNLPLFRREIRGEARAQGADYRPTVDDEVEDLYELLSAVKAAIPDVEGVASGAILSNYQRVRVENVDQKQLLEEMIESGLDAVLIKVAAMGLKRNHLGKTLNEMYPHLLQMHERFDAHICGEGGEFESFTRDCPLFVKRIILDEVETVIHSDDAVAVVAYLRIKKAHVEDK
PF01902	Rirr_FungiZyg	MKVVALISGGKDSCYNMMHCVANGHQIVALANLKPQSKSGKDELDSFLYQTVGHDAIEYYAECINLPLYRAEIMGSSLVQDADYQQTLGDETEDLYQLLKQVKEELPDIQAVSVGAILSNYQRVRVENICNRLGLTSLTYLWRRNQKELLGEMINAGINAIIIKVAAIGLKPSHLGKSIEQLYPYLCDLNEKYDVNICGEGGEYETFTLDCPLFVKRLVVEETETIVHSDDAFAAVAYLRLKRL
PF01902	Mcir_FungiZyg	SGGKDSCYNMMQCVANGHEIAAIANLKPPHESGKDELDSFMYQTVGHDAIHLYSECMDVPLYRREIRGGSVLQASDYTVTADDETEDLYMLLKDVLNDHPDIKGISVGAILSNYQRVRVEHVCNRLGLTSFAYLWRRDQKELLYEMANAGVNAILIKVAAIGLKSTHLGKSIGQMYPYLCKMNDMYDLHICGEGGEYETFTVDCPLFKKRIIVEETETVVHSDDAFAQVAYLKFQKCRLEAK
PF01902	Rory_FungiZyg	MMQCVANDHEIIALANLKPSSGSGKDELDSFMYQTVGHDAIHFYADCMQLPLYRREITGTAISLGAQYEVTPKDETEDLYELLKEIKEKHPEVQGVSSGAILSSYQKVRVENVCDRLGLTSLAYLWERNQKELLAEMADSGVNAILIKVAAMGLGEKDLGRTIGEMYPKLLQLNEKYGSHICGEGGEYETFTLDCPLFKKRIVV
PF01902	Mver_FungiZyg	MKVLGLISGGKDSFYNLMQCVANGHSVIALGNLHPRPQDKKDELDSYMYQTVGHDVIHLYEECLQVPLYRQTIKGTPIEQGSDYVKTEMDETEDLYELLHTVKERHPDLQAVSVGAILSNYQRIRVENVCARLGLVALAYLWQRDQEELLHEMAQAGVNAVLIKIAAMGLKKQHLGQSIGDMFPHLCKMNQEFDLHICGEGGEYETITLDCPLFKKKIVVDESEIVIHSDDAFAQVAYLRFKQLHLEEK
PF01902	Nk52_Ichthyosporea	MKVVALISGGKDSCYNMMQCVAVGHEIVALANLHPAGNEDELDSYMYQTVGHECIGMYAQAMDLPLYRRGIQGSSKITTMTYEENKQDEVEDLYELLKTVLEKHPEVKGVSVGAILSDYQRVRVENVCGRLGLTSLGYLWRREQKELLHEMVSFGVHAILVKVAAIGLSPSKHLGKSLGEMEAHLLAMNSKYDLHPCGEGGEYETLVLDCPLFKKKLVVEESEIVIHSDDAFAPVGYLRAKRVGVIEK
PF01902	Pgem_IchthyosporeaIchthyophonida	VEYGHEIVAIANLHPPNGVDELDSWMYQTVGHEAIELLAEAMELPLFRRETKAEAKNYDLTYKRTEGDEVEDLYQLLLDVKKKHPEVTAVSSGAILSSYQRTRVENVCERLGLVSLSYLWQRDEEELLNEMINNGVEAIIIKIAAMGLKPVNLGKTLGELQPHLLEMNQKYELHVCGEGGEYETFTLDCPLFKKRINIEESQI
PF01902	Adig_Metazoa	MKVVALISGGKDSCYNMMQCVQYGHTIVALANLKPKDGAPEELDSYMYQTVGHNAIDLYAQAMNLPLYRETIQGSSISQGKVYTELEEDEVEDLYRLLKKIKEDIPFEAISVGAILSNYQRVRVEHVCSRLGLSSLAYLWRRDQQELLSEMISSGIEAVLIKVAAMDLSPHHHLGLSIPEVYSLMCKLKERYGSNICGEGGEYETFTLDCPLFKKKIVIDESEIIIHSDDAYAPVGFLHFKKMHLEDK
PF01902	Nvec_Metazoa	MRVVALISGGKDSCYNMMECVRNGHEIVALANLKPEKKDELDSYMFQSVGHNAINLYAEAMELPLYQRIISGSSVELGKNYKINKDDEVEDLFELLKSIQEKMEFDAIAVGAILSDYQRVRVEHVCTRLGIASLSYLWRRDQKELYTEMLSSGLVAIIIKVAVMGLSPRKHLGLTMEQLFPTVCKLNNEIGMNICGEGGEFESFTLDCPLFKKRIIIDESEVVIHSDDAFAEVGFLRLKAMHLEDK
PF01902	Skow_Metazoa	MKIVALISGGKDSCYSMMQCVAEGHKIVALANLKPEKKDEMDSYMFQTVGHDGVELYAQAMDLPLYRRTIFGSSIVTDKNYVPDIMDEVEDLFQLLHNIKKDIDFEGVSVGAVLSDYQRVRVESV
PF01902	Bflo_Metazoa	SGGKDSCYNMMQCVAEGHQIVALANLRPQGKDELDSYMFQTVGHDAIDLYAEAMSLPLFRRTIQGGSVQVGMDYTPTDADEVEDLFLLLQEIKEEVEIEAVSVGAILSDYQRVRVENVCSRLGLTSLGYLWRRDQQELLQEMIDSQVHAILIKVAALGLDPDKHLGLTLQQIYPHMLKMNEKYGLNICGEGGEYETFTLDCPLFRKKIVIDCSEKVVHSADPFAPVAYLKFPKMHLEEKI
PF01902	Ctel_Metazoa	SIFSGGKDSCYNMMQCVSEGHEIVALANLRPKDPDKNEIDSYMFQTVGHQAIDLYAEAMGLPLFRQTIEGSSVELGMYYTETEADEVEDLYKLLSRVKEECPIEAVSVGAILSDYQRVRVENVCQRLGLTSLAYLWRREQDELLDEMIAAQVKSIIVKVAAMGLNPDEHLGLTLSQIQPHMREMNEKYGLNICGEGGEFETFTLDCPLFKMKIIVDDKEILMHSDDPFAPVAYLQLKEMHLEEK
PF01902	Lgig_Metazoa	ITSGGKDSCYNMMQCVAEGHEIVALANLKPKECDELDSYMYQTVGHHAIDIYAEAMSLPLYRRTITGESKLLDKYYTPTEGDEVEDLYELLKDIESKEKIEGVSVGAILSDYQRVRVENVCERLGLTSLCYLWRRDQDELLSEMIQCQVEAVIIKVATLGMIYPDKHLGKTISEIYPLMVKLNSQYGVNICGEGGEFETFTCDCPLFNKKIVIDDVQRVMHTVDPFSPVGYLNLQKLHLEDKMN
PF01902	Xtro_Metazoa	MRVVALISGGKDSCYNMMQCVSAGHQIVALANLKPPESTADELDSYMYQTVGHHALELYAEAMGLPIYRATLQGTSLDTGRAYAPQEGDEVEDLYRLLKLVKEKEAVDSVSVGAILSDYQRVRVENVCQRLGLQPLAFLWRRKQEELLDEMISSGLKAILIKVAAFGLDPDKHLGKTLEDMRPYLKQLSDKYGVHVCGEGGEYETLTLDCPLFKKRIVVDSAEVTMHSNDAFAPVAYLRLSKLHLEDKITN
PF01902	Tadh_Metazoa	MKTVALISGGKDSCYNMLECVRHGHQIVALANLYPDGSQDELDSYMFQTVGHQAIHLYADAMNLPLYRHPLKGSSIATDRYYSPTAKDEVEDLYELLKEVQNDIEIEAVSVGAILSNYQRVRVENVCSRLGLVSLAYLWQRDQQDLLMEMIDDGIDARIIKVAALGLEPQKHLGKSLQEIAPVMRRFNQKYGLNICGEGGEYETFTLDCPLFTQKIIIDRQEILIHSDDAFAPVGYLRFQEMHLQAK
PF01902	Dpul_Metazoa	MRTVALISGGKDSCYNILQCIAAGHEIVALANLHPPISSNESNFFTLDEMDSYMYQTVGHDAIDLYSEATGLPLYREAIIGTSLQQGSDYTHESPEDEVEDLYRLLSHVKEMESIEAVSVGAILSNYQRVRVENVCNRLGLTSLSYLWQRDQEELLNEMILSGMNSILIKVAALGLDPKKHLGKSLQECQHDLLKLKAKFGLNVCGEGGEYETLTLDCPLFKKSIVVIESETVPHSKDPFAPVAYLKFPKLSLAHKV
PF01902	Crev_FungiZyg	MKVVALISGGKDSTYNMMECFKHGHEIVALAHAHPPYNTGKEELDSFLFQTVGSSAVYAIAECMELPFFHKEIRGTAVTQELGYTVTKDDETEDLYALLKEVKEHNPEVGAVSVGAIFSSYQGNRVQHVCDRLGLKMLAYLWHRDQVELLQEMVSNGVEAILIKVAALGLGSEDLGKTLSEMTPKLLKLHEKYGIHPCGEGGEFESFTLDCPLFKKRIVVDKSETITHSEDQVAPVVYLSIKQLHIVPK
PF01902	Bden_FungiChy	MKVVALISGGKDSCFNMMHCVANGHTIVALANLHPPSTSNVDELDSYMFQTVGHDVISNYSECMDIPLFRQDLAHRSVDINATYTLNDNDEVEDLFQLLLKVIKQVPDVEAVSSGAILSNYQRTRIENVCSRLKLQSLAYMWQGSQKQLLMDMIDSGVEAVLVKVAAAGLSENHLGKSLAQMYPVLMKLNERYGINVCGEGGEYETLTLDCPLFKKKLLIQESTIHVHSFDDVAPVAYLK
PF01902	Hmag_Metazoa	MRVVALISGGKDSCFNMMHCVAHGHEIVALAHLKSSLVDEMDSYMYQTVGHNVVELYSEALGVPLFQQSILGSAVCQSSIYKIDKHDEVEDMYQLLNMIQNSIDYDGVSSGAILSNYQRVRVENVCSRLNKQSLTFLWQKDQVELLQDMINNSVNAIIIKVAALGLEPKKHLGKNLFEMQDHLLKMKEAYQLNVCGEGGEYETMTLDCPLFLKRIVIDETKIIIHSDDAFAPVGYLSFKKMHLEDK
PF01902	Ccor_FungiZyg	SGGKDSCFNMMECVKNGHEIVALANLHPPESSDKDELDSYMYQTVGHNVIENYAKCMDLPCYRQPINGTPINQEMNYETTDLDETEDLFILLKRIQDEIPDIEGVSVGAIFSSYQSNRVEHICKRLNLKPLAYLWQREQEQLLQDMIDSKLNAILIKVAAMGLKPIHINKTLEEMKPILTDLNQKYGINVCGEGGEFESLTLDCPIFKRRLVIDEYETVMHSKDAFAPVAYMKILKLHVEDK
PF01902	Spom_FungiDik	MKVLGLISGGKDSCFNLMHCVSLGHEVVALANLHPEDGKDEIDSFMYQSVGHDVIPLYAECFDLPLYREKIGGQSINQNLDYQFTEKDETEDLYRLIKRVLTNHPDLEAVSTGAILSTYQRTRVENVCKRLGLKSLSFLWQKDQEKLLNDMVVSGLNAILIKVAAIGLTRKDLGKSLAEMQDKLLTLNKKFELHPCGEGGEYETLVLDCPLFKKRIVLTDKEVVEHSSGEVCYLKVKACVK
PF01902	Sdes_IchthyosporeaDermocystida	MKVVALISGGKDSCYNMMQCVAMGHEIVALANLYPEVGDELDSFMYQTVGHECIQMYADIMQLPLYQQAISGGSIETDMEYKMNALDEVEDMHLLLKTVILSDYQRKRVENVCQRLNLKSLAFLWQRNQQELLQEMIDHQVEAILVKTAALGLHPHKHLAKTLHQVQPHLEKIHLLYGAHICGEGGEYETIV
PF01902	Cfra_IchthyosporeaIchthyophonida	MKVIGLISGGKDSCFNLIECVRNGHEVVALANLRPATSSGKDELDSYMFQTIGHEAIEAIAMAMELPLFRRDLQGLPLSTDMHYSSTPTPQDEVEDLYKLLLDVKTSMPEVQAVSVGAILSSYQRIRVESVCARLGLTSLAFMWEREQHELLAEIIDSGVEAVLVKIAACGLQHCHLGQSLREMHSTLTKLNTQFELNVCGEGGEYETFTLDMPLYKKRIHVDKSEIIRVSEDSMAPVAYYRINKFSLVDKDI
PF01902	Sarc_IchthyosporeaIchthyophonida	MKVVALISGGKDSCYNIIECVRNGHEIVALANLRPPMDSYTFQTVGHEAIDAIGQAMELPLFRGDLIGRPVATEMHYTKPLDARDEVEDLYDLLSDVKRQMPLIEGVSVGAILSDYQRLRVELVCQKLGLKSLAYMWHRDQHDLLSDIIVLVKVAACGLQHRHLGQTLNAMQQTLTTLHHTFELNVCGEGGEYETFTLDMPLFKKRIVVEDAEIVRVSEDKLAPVAYYRINRFSLVDK
PF01902	Hnan_ChoanoflagellataAcanthoecidae	MKFVALVSGGKDSIHCMVHAVALGHTPVVLANLQPIEVDEMDSYMYQTVGHEVIELIAEAMELPLVRRRIEGKALNTGMAYSHTDGDEVEDLTKLLEDVQRQYPEVEAVSVGAILSNYQRIRVETVCRRLGLVTLGFLWQRDQAELLDEMVASNLHAILIKVASIGLSPAKHVWKSLAEVRTTLHSLNAKYGVHVCGEGGEFESLVLDSVLYRKRIVIDESEIVMHSDDSFAPVGYLKVRSAHLEDK
PF01902	Dcos_ChoanoflagellataStephanoecidae	MKVVGLISGGKDSIHNLLHVVAQGHELICLANLCPVERDELDSFMYQTVGHEVVECVARAMRLPLVRHAITGQSLQQDMVYRGAVAGDEVEDLYNLLDSVTKEFPGVEAVASGAILSNYQRLRVENVCSRLGLKSLSYLWQRNQQELLDEMISCGLVAVTVKVAAAGLSPHKHLNKTLNQLQPTLVKLKQRFDVHVCGEGGEYESTVLDSPLFHTRLKLEQVEIVESSGD
PF01902	Pbif_Breviatea	MKVVGLISGGKDSIYNLMQCVKYGHEICALANLKPPVTGEDELDSFCFQTVGHSVIEQMAVAMKLPLFRHDLQRKSVIVEMDYVQSEDDEVEDLFALLNSVKQSMPEIEAVSVGAILSNYQRIRVEHVCKRLGLVPLAYLWQQDQSSLFDQMLADGLVAVLVKVASMGLFPEKHLGKTLNQVSPVLRKLEAMYGMSVCGEGGEYETLTVDCPLFHSALEMEDVEIVNTSLDPYAPIGYLKIPSCSLVSK
PF01902	Aque_Metazoa	MKVVGLISGGKDSMYNLMQCVASGHSIVALAHLKPLSEEEQDSMMYQSVGSEGVELQAKALGIPLYTSLTRGRTKQTSMEYEREEGDEVEDLMELLTKIKSEVRIEGVSVGAIMSDYQRIRVEDVCKRLQLVPLAYLWHRDQSVLLQDMINDKLTAVLIKVASIGLSQKDLGKTLQEMQPRLQSLNKEYGMNVCGEGGEYETFTLDCPLFQKSIKLVDSKVILHSDDAFAPVAYLKLTQLSLQDKNS
PF01902	Sros_ChoanoflagellataCraspedida	MDVVALVSGGKDSCHNMLHCVAAGHRIVALANIAPPQDQDEVDSYMYQTVGHEAITRLAQALELPLYRATITGGSVDTSKDGVSVGAILSDYQRTRVENICSRLNLTALSYLWQRSQPSLLAEMLDTGLQPIVIKVAAMGLNPRKHCGKPLSALQPLLHRLHGEFDLHVCGEGGEYETFTVDGPLFKKRLVPTNTRVVMHSDDAFAPVGYLRLGEIALEDKTEDELPP
PF01902	Mbre_ChoanoflagellataCraspedida	SGGKDSCHNLLHCVANGHQVVALANLAPPEQPHDVLVSDELDSMMYQTVGHEGIELLAAALDKPLYREAIVGACVSDTKTYHRAERDEVEDMDRLFQRVIRSHPDVEAVSVGAILSDYQRTRVEQVAARHGITVLSYLWQRDQAELLAEMVASGLEAIVIKVAAMGLMPRKHLGQTLGMLSPTLHKLHDLYEVHVCGEGGEYETFVLDSPLFTRRLVVEESTTIIHSDDAFAPVGYLQLQRLALVDKPGHVVPD
PF01902	Ocar_Metazoa	MRVVGLISGGKDSCFNLLKCLAEGHEIVAVANLRPPKDEHELDSYMFQTVGHEAVPQMAEAFGSLPFYMREEVDFDGVSVGAIRSDYQRIRVENVCGRLGLICLAYLWRVDQRILLKEMIGIGLNAIVIKTAAMG
PF01902	Amac_FungiBla	SGGKDSCFNVVHCVANGHDVVALANLHPDELDSHMYQTVGHDVIPLYAKCFDLPLFRRAIAGASANIAMTYDHAGAATGDGDGHVVDEVEDLYLLLKDVVTAMPEVKGVSVGAILSSYQRVRVENVCQRLGLQVFGYLWQGDQVELLASMVNAGMNSILIKVAAMGTMSIPRLFGRHAQFDLHPCGEGGEYETITLDCPVFRRRLVVKTAETIMHSDDEIAPVLYQRLVDVDVEDKTELVP
PF01902	Cang_FungiBla	MKAVALISGGKDSCFNALHCVANGHQIVALANLHPPADQGDELDSHMYQTVGHNVIPLYAQCFFHPESTAIDAPPLPMFRRAISGTSASIGISYDNAADRQSSEGAAQEALDEVEDLFELLSEVKRAIPDVQGVSVGAILSTYQRVRVEHVCQRLGLTVLAYLWQQDQVALLDSMVRAGMNSVLIKVAAMGLNGRHLGRSLAQLQPHLLKMHADFDLHPCGEGGEYETLTLDCPLFRRRLVLHQPTVVEHSPDEMAPVLFYSFDHVTVEDK
PF01902	Cowc_Filasterea	GHELVALANLMPAASAPDELDSFMYQTVGHEAVDAIARALELPLVRRAILGTSLHTELAYDPSVTAAAAGAPSTVGGGPDEVEDLFALLQQVKELHPEVEAVSVGAIASDYQRLRVEHVCKRLGLTSLAFMWRRPQADLMREMIDAGLEAILIKVAAVGLEPRKHLGKTLGQVHSHLQRMNEMYGLHICGEGGEYESFTVDCPLFRHRIVVDETEIVVHSHDPIAPVAYLRIKKLHLEPK
PF01902	Rall_FungiCry	MRVVGLISGGKDSCFNLMNCVALGHEIVALANLCPPKNHPDERDSMMYQTVGHDFIELISQCLELPLFRRCLETHDERVENVDWENEVHDLYFLLEMVKREHDIEAVSVGAILSTYQRERVEQVCNKLGLKTLAYLWCQDQKSLLNEMIDCDLNAILVKVASLGLDQRHLGKSLAQMKDHLYDLERKFGGNVCGEGGEFETITLDCPIFKKRIVIEESEVVVHSNDAFAPVLYLKPKILSVKEK
PF01902	Ttra_Apusozoa	KVIALVSGGKDSCYSMMEVVAQGHELVAIANLHPVDEETDELDSYMYQTVGHSLIAAYADALDVPLFRRGIAGSSANKDKVYRPTEGDEVEDLRALLLEVKAAVPEADAIASGAILSDYQRTRVEHVASSLGLASFAYLWHRSQDLLLDAMIESGIDAILVKIAAMGLAVDRHLGAHLADIRDHLFSLNAKYTSHICGEGGEYETLTLDAPLFTSRIVLTETTTVVVDESMFAPVAHLTVNGFTLEAK
PF01902	Umay_FungiDik	MKVVGLLSGGKDSCYNLIHCVQQGHELVALATLAPPGSKDELDSYMYQTVGHDAVHLVAEAMQLPLYRRVIKGTAINQRAEYGLRTTSLSSSIASSSTSKAGPLQDETEDLYHLLMDVKQHHPDVEAVSVGAILSNYQRVRVEHVAMRADVNLTPLTFLWQRSQSELYAEMLQAGLVSILIKVAGIGLDERDLGKTLGQMQRKLERLSAMYGAHVCGEGGEYETLTIDSPLFRKRIEVGDTETVIHSDGGGFGSVSYLRLKNAKLVEKEGHLDCKART
PF01902	Mvib_Filasterea	CYSVVQCLALGHEVVAFANLQPESGKHELDSFMYQTVGHEAVALIAQAAELPLVRRQIQGRSTVVSMEYSVCADDEVEAVCSGAILSDYQRIRVEHVCKRLGLISLAWLWQRNQHELLNEMITAEMNSVLIKVAAAGLVPSRHLGKSLAEMQQTLVKLNQMYEVHECGEGGEYETFTTDAPFFTQRIILGERNIVSESDDTVCPVAHLLIHAATVEAK
PF01902	Nspp_Discicristoidea	MQVVGLLSGGKDSCMALLHALAHGHTLRALANLAPPRGLHEIDSWMYQTVDEVERLTDVLRAVRAALPEIDAVAVGAILSDYQRARVEHVCARLGLTVLAYLWREDQTALLCTIFACEMRPVLVKVAAVGLDPRKHLGRPLGDVFAHLQLLHERYDVHVAGEGGEYETLTLDAPIFRRRLRLDRTELVLVSHNPVAPVGYLRLPEVTLEDK
PF01902	Cneo_FungiDik	KVIGLVSGGKDSCFNLMHCVANGHEIVALATLTPEPGIDELDSHLYQSVGTHLLPLLAQSMSLPLYTKVIRGKAISQGPEYGSRLRLGAGTGQKGDETEDLTCLLSDVLEAHPEATALSSGAILSTYQRLRIEHVCGRLGLTSLSFLWQSEQSVLLDRMLGSGVEAVIMKVAGVGLGVGVVGRQLGQIRPLLAKLEAQYGSHPAGEGGEYETLTLSTPLFSHRLKLVKTETVVTDPEPYTVAYLKVEEAVL
PF01902	Ihof_IchthyosporeaIchthyophonida	MDVVALISGGKDSCYNMIQCVQHNHRIVALANLRPPPEEGMEEMDSFMYQTVGAEAIGLYSEAMGLPLFELLQDMLDDDVTAVIIKVAACGLQAKHLGKTLNELQPHLWKMCDMYGLNVCGEGGEYETFVLDCPLFKKRLAIKESVAVITSDNDYAPVAYLRLKSVGLE
PF01902	Mlei_Metazoa	KIVALVSGGKDSTYTIHQCVRAGHDIVALAHLHPPPQQDELDSYMYQTVGHNVVGCLSKTLGVRLFAREISGLPIAQELGYKKTENDEVEDLYELLREVKENTACTAVCSGAIFSTYQKNRVEEVCSRLGLVSIAPLWEREQETLLEEMIDNHLQIRIIKVASIGLDKSHVGKQAAELLPHFKGINKKFGFNVCGEGGEYESLVTDCPLFAYRIQVDSSEKVCHSEDDMAPVWYEKFTDVSLVEK
PF01902	Awhi_IchthyosporeaIchthyophonida	MKIVGLVSGGKDSCYNLMQCVAHGHEIVALGNLHPTKGKDELDSWMYQTVGHEAIEYIAQAMELPLYRQELVSGLKCEELVYSKTEGDEVEDLYKLLTTVMEKHPDIDHFLEMHKKYDLHVCGEGGEYESLTLDCPLFKKRLVIDEYEIIPLSKDPFAPSAYFKILKMHLEPKGDR
PF01902	Falb_Discicristoidea	MQVCALISGGKDSLMAMNLALQDGHAIIALANLFPPADEMDSYMFQTIAHSAIPLYEECLAHAGVPLFREPITGRPVQTAMDYAAATEADEVEDLFRLLSRVKDAIPSLQAVCSGAILSDYQRLRVENVCRRLDLVPLAPLWALPQAALVPRMIAAPLDAVLVKVAAMGLVPRRHLGMTLSAIWPTLMRLDMYGLNVAGEGGEYETLVLDAPFFSRRIVL
PF01902	Clim_Corallochytrea	MRVAGLVSGGKDSVYSMCQCIAAGHQIVALINLRPDGDTLDVDSYMYQSIGHEAVTLLPQCLPTGPDGKNVPLFRGTLSKDGSRNRDRGYDHAKPVEGDEVEELFRVVKECMESTGIEAMCSGAVLSDYQRVRVEGVCARLGLLSIAPIWRYSQRGVLEALADAGINAIMAKCASMGLRPDRDLGKNVATLQTIARFSDLNEQFGFHEAGEGGEYETIVLDCPIFSRGRLVIDEAEIKVSEPDPMAPIAHYVVKRISVVKPQDE
PF01902	Clii_Corallochytrea	MRVAGLVSGGKDSVYSMCQCIAAGHQIVALINLRPDGDTLDVDSYMYQSIGHEAVTLLPQCLPTGPDGKNVPLFRGTLSKDGSRNRDRDYDHAKPVEGDEVEELFRVVKECMESTGIEAMCSGAVLSDYQRVRVEGVCARLGLVSIAPIWRYSQRGVLEALADAGINAIMAKCASMGLRPDRDLGKNVATLQTIARFSDLNEQFGFHEAGEGGEYETIVLDCPIFSRGRLVIDEAEIKVSEPDPMAPIAHYVVKRISV
PF01902	Gpro_FungiChy	MKVIALVSGGKDSTLALLHTLALGHDVVALANLHPFDASDAGANGETDHLVSPDPDLAEEKEDQDHNGDLDSHMIQTVASEAVHLLARAADLPLYRRKTRGRAVCKTQDYVSPSPGARGVNVDEAVLAHDDAGIEVEIDEVEDLFQLLKSARDATRADAVCSGAILSNYQRVRVEEVCSRLNLTPIAPLWRRHAHDPALVLDELDAAGVDAVLVKVASMGLSRRFLGRTVSSLKPLLRRAAQLYQINPAGEGGEYETFTLDCPLFRKQRIELTRTATVPPDALDDPLLAPTAHLQIIEARLVDR
PF01912	Acas_Amoebozoa	MAVRSQFENSSEVGVFARLTNTYCLVAYGGSDNFRVFEAELQDHIPVVRASIAGCRIVGRLTVGNKNGLLLPNTTTDQELMHIKNSLPDEVVVQRVEERLSALGNVIACNDYVALVHPDLDRETEEIVADVLGVEVFRQTIASNVLVGTYSVITNQGALVHPKTSVEDQDELSSLLQVPLVAGTVNRGSDVIGAGLLANDWTAFCGFDTTATEISVIEKIFKLQDNAPQATMADMRTQLIEEMS
PF01912	Ppol_Amoebozoa	MAVRAQFENSSEIGVFAKLTNAYCLAAYGGSETFKVFETELADHIPVVYTTINGCRIVGRLCAGNKRGLLLPNTTTDQELLHIRNTLPDSITVQRIEERLSALGNVIATNDYVALVHPDIDKETEEIIADTLGVEVFRQTISGNALVGSYIALSNQGGLVHPMTSIEDQDELSSLLQVPLVAGTVNRGSDVIAAGMCVNDWSAFVGLDTTATEI
PF01912	Pbif_Breviatea	MAVRAQFENSSEIGVFSVLTNAYCLVAQGGSVNFYSVFEGELGDHIPVVHSTIAGTRITGRLCVGNKNGLLVPNTATDQELQHLRNSLPDSVVVQRVEERLSALGNTIACNDYCALVHPDLDRETEEIIADVLNVEVFRSTIGGNGLVGSYCRFTNQGGLVHPATSVEDQDELSSLLQIPLVCGTVNRGSDVIGAGLVANDWSAFCGLDTTSTELSVIESIFKLDGNVHGNIDTMQPSLID
PF01912	Bden_FungiChy	MAVRAQFENSNDIGAFAKLSNSYCLVAIGGSENFYSVFESELADVVPIVHTSIGGNRIIGRLSAGNRHGLLLPNSTTDQELQHIRNSLPDAVAVQRIEERLSALGNVIACNDYVALVHPDIDRETEEIIADTLKVEVFRQTIAGNVLVGSYCSLSNQGGLVHPKTSVEDQDELSSLLQIPLVAGTVNRGSDLIGSGLIVNDWSAFAGLDTTSTELSVIESIFRLQDKRPTYVVNEIRDSLIDSM
PF01912	Spun_FungiChy	MAVRAQFENSNDIGVFSRLTNSYGLVAIGGSENFYSVFESELSDVIPVVHTSIGGTRIIGRLTAGNRHGLLLPNTTTDQELQHIRNSLPDTVAIQRVEERLSALGNVIACNDYVALVHPDVDRETEEIIADVLKVEVFRQTVAGNVLVGSYCALSNQGGIVHPKTSVEDQDELSSLLQIPLVAGTVNRGSDLIGAGLVVNDWSAFAGLDTTSTELSVIESIFKLQDAQPTYIVNQMRDSLIDRL
PF01912	Crev_FungiZyg	MAVRAQFENSNEIGVFSKLTNSYCLVALGGSENFYSVFESELGDVVPVVHTSIGGTRIIGRLTAGNRRGLLVPNSTTDQELQHIRNSLPDSVAIQRIEERLSALGNVIACNDYVALVHPDLDRETEEIIADVLGVEVFRQTIADNVLIGSYCALSNQGGLVHPRTSLQDQDELSSLLQVPLVAGTVNRGSDVIGAGLVVNDWSAFAGMDTTSTELSVVESIFKLQNAQPSAIVGEMRDSLID
PF01912	Mcir_FungiZyg	IGAQFENSNEIGVFSRLTNSYCLVALGGSENFYSVFEGELGDVIPVVHTSIAGTRIIGRLTAGNKNGLLVPSTTTDQELQHLRNSLPDNVAVQRVEERLSALGNVIACNDYVALVHPDIDRETEEIIADTLQVEVFRQTIADNVLVGSFCALSNQGGLVHPRTSVQTQDELSSLLQIPLVAGTVNRGSDVIGAGCVVNDWCAFAGMDTTSTELSVMESIFKLQDAQPTAIVNELRDTLVDT
PF01912	Rory_FungiZyg	MAVRAQFENSNEIGVFSRLTNSYCLVALGGSENFYSVFEGELGDVIPVVHTSIAGTRIVGRLTAGNKNGLLVPSTTTDQELQHLRNSLPDSVAVQRVEERLSALGNVIACNDYVALVHPDIDRETEEIIADTLKVEVFRQTVADNVLVGSYCAISNQGGIVHPRTSIQDQDELSALLQIPLVAGTVNRGSDVIGAGCVVNDWCAFAGMDTTSTELSVMESIFKLQDAQPTAIVNELRDTLVDT
PF01912	Pisp_FungiNeo	MAVRAQFENSNDIGVFSKLTNSYCLVAIGGSENFYSVFESQLADVIPVVHTSIGGTRIIGRLTAGNRHGLLVPNTTTDQELQHLRNSLPDSVAIQRIEERLSALGNVIACNDYVALVHPDIDRETEEIIADTLKVEVFRQTIAGNVLVGSYCSISNQGGLVHPNTSIQDQDELSSLLQIPLVAGTVNRGSDLIGAGCVVNDWSAFVGLDTSSTEISVIEKIFNLQNTKSSYVVNEMRDQLID
PF01912	Mver_FungiZyg	MAVRAQFENNNEIGVFSMLTNSYCLVAIGGSENFYSVFESELGDVIPIIHTSIAGTRIIGRLCVGNRHGLLVPSTTTDQELQHLRNSLPDTVAIQRVEERLSALGNVIACNDYVALCHPDIDRETEEIIADVLKVEVFRQTIADNVLVGSYCALSNQGGLVHPRTSIQDQDELSSLLQVPLVAGTVNRGSDVIGAGLLVNDWCAFAGLDTTATELSVIESIFKLQDNGPSAIVEDMRDSLVD
PF01912	Rirr_FungiZyg	MAVRAQFENSNELGVFSRLTNSYCLVAIGGSENFYSVFESELGDVIPVVHASIAGTRIVGRLSAGNRKGLLVPSTTTDQELQHLRNSLPDSVKIQRIEERLSALGNVIACNDYVALVHPDIDRETQEIIRDVLEVEVFTQTIAGNVLVGSYCAISNQGGLVHPRTTVQDQDELSSLLQIPLVAGTINRGSDVIGAGIVVNDWTAFAGLDSTSTELSVVESIFKLHDAQPTAIVKQMRDSLVD
PF01912	Nspp_Discicristoidea	MAVRAQFENSNEIGVFARLSNSYCLVAVGGSENFYSVFESQLADVVPVVHTTIAGTRIIGRMSVGNRNGLLVPSTTTDQELQHLRNSLPDAVAIQRVEERLSALGNCIACNDYVALVHPDIDRETEEIIADTLKVEVFRQTIAGEVLVGSYCTLSNQGGLVHPRTTVEDQDELSSLLQVPLVAGTVNRGSDVIGGGLIVNDWSAFVGMDTTSTEISVIESIFKLQDAQPTAIVKEMRESLID
PF01912	Ccor_FungiZyg	MAVRAQFENSNEIGVFSRLTNSYALVAIGGSENFYSVFESELNDTIPVIHTSIGGTRIVGRLTVGNRNGLLVPFTTTDQELQHLRNSLPEKVQIQRVEERLSALGNVVACNDYVALVHPDIDRETEEIISDVLGVEVFRQTIADNVLVGSYCAISNKGGLVHPRTSIQDQDELSSLLQVPLVAGTVNRGSDVIGAGMVVNDWSAFAGMDTTATELSVVESIFNIQDSNAGAVVNEMRDALID
PF01912	Colp12	MAVRARYENQNEIGVFAKLTNSYCLVAIGGSENFYSVFEGELADVVPVIHTSIANTRIIGRLTVGNRKGLLVPHTTTDQELQHLRNSLPDAVKIQRVEERLSALGNVIACNDYDALVHPDIDRETEEIIADVLGVDVFRHTVADQVLTGTYCVFSNQGGLVHPRTSVQDQDELSSLLQVPLVAGTINRGSDMIGAGMVVNDWAAFCGLDTTSTELSVVESIFKLQDAQPTAIVNEMRDSIIES
PF01912	Sdes_IchthyosporeaDermocystida	MAVRAQFENSNEVGVFAKLTNTYCLVAIGGSESFYSVFEGELADIIPVIHCSIAGCRIIGRLTAGNRHGLLVPNNTTDQELQHLRNCLPQTVKVRRIEERLSALGNIIACNDYVALVHPDVDKETEEIIADTLQVEVFRQTIAGQSLVGSYCSFTNQGGIVHPKTSVQDQDELASLLQIPLVAGTVNRGSDVIGAGIVVNDYMAFCGMDTTSTELSVIESVFKLHNMQPSAVVSDMRESLID
PF01912	Nk52_Ichthyosporea	MAVRAQFENSNEIGVFAKLTNSYCLVAIGGSESFYSVFEGELSDVIPVIHCSIAGTRIVGRLTAGNRHGLLVPSTTTDQELQHLRNCLPDAVKLRRVEERLSALGNVIACNDYVALVHPDLDKETEEIIADTLNVEVFRQTLANQPLVGSYCALSNQGGIVHPRTTIQDQDEVSSLLQIPLVAGTCNRGSDVIGAGLVVNDWAAFCGMDTTSTELSVIESVFKLQDAQPSAVVTDMRDSLID
PF01912	Amac_FungiBla	MAVRAQFENSNDIGVFARLTNSYCLVAVGGSENFYSVFEAELGDVIPVIHTSIAGTRIIGRLTAGNRHGLLVPNTTTDQELQHLRNSLPDKVAVQRIEERLSALGNVIACNDYVALVHPDIDRETEEIIADVLQVEVFRHTVADNVLTGSYAVISNQGGMVHPQTTLQDQEELSSLLQVPLVAGTVNRGSDALGGGLIVNDWAAFVGYDTTGTEMSVIESIFKLHDAGAQAIVTDMRDSLIDSM
PF01912	Cang_FungiBla	MAVRAQFENSDDIGVFARLTNSYCLVSIGGSENFYSVFEAELGDVIPVVHTSIAGTRIVGRLTAGNRHGLLVPNTCTDQELQHLRNSLPDAVAVQRVDERLSALGNVIACNDYVALVHPDIDRETEELIADVLKVEVFRHTVADNVLVGSYAVISNQGGMVHPRTSVQDLEELASLLQVPLVAGTVNRGSDVLGGGLIVNDYSAFVGYATTGTEMSVIESIYKLHDAGSQAIVTDMRDSLID
PF01912	Adig_Metazoa	MAVRVQFENSNEVGVFSKLTNAYCLVGIGASENFYSAFEGELADVIPVVHASVAGCRIIGRLCVGNRHGLIVPSTTTDQELQHIRNSLPDSVKMQRVEERLSALGNVVACNDYVALVHPDLDRETEEILADVLKVEVFRQTVAGNVLVGTNCALSNRGGLLHPRTSIEDQDELSSLLQVPLVAGTVNRGSDVVGAGMVVNDWIAFCGLDTTSTELSVIESVFKLGDGQPSAIATTMRSTLFE
PF01912	Skow_Metazoa	MAVRAQFEGNNEVGVFSKLTNSYCLVAIGGSENFYSIFEGELSEVVPVVHTSIAGCRIIGRMCVGNRHGLLVPNSTTDQEMQQMRNSLPDSVKIQRIEERLSALGNVIACNDYVALVHPDLDRETEEILADVLKVEVFRQTMADNVLVGSYCAISNQGALVHPRTSVEDQDELSSLLQVPLVAGTVNRGSDIIGGGMVVNDWCAFCGLDTTSTELSVIESVFKLGDSQPSKVTTEMRDTLIESMT
PF01912	Xtro_Metazoa	MAVRASFENNNEIGCFAKLTNTYCLVAIGGSENFYSVFEGELSETIPVVHASIAGCRIIGRMCVGNRHGLMVPNNTTDQELQHIRNSLPDSVRIQRVEERLSALGNVIACNDYVALVHPDLDRETEEILADVLKVEVFRQTIAEQVLVGSYCAFSNQGGLLHPKTSIEDQDELSSLLQVPLVTGTVNRGSEVIAAGMVVNDWCAFCGLDTTSTELSVVESVFKLNEAQPSTIATSMRDSLID
PF01912	Ctel_Metazoa	YSIFEGELSDTIPVVHSSIAGCRIIGRLVVGNKNGLLVPNSTTDQELQHIRNSLPDTVKIQRVEERLSALGNVVVCNDYVALVHPDLDRETEEIIADVLK
PF01912	Aque_Metazoa	MAVRVQFEGNNEVGVFSMLTNAYCLVAIGGSQNFYSVFEGELSDSIPVVHASIGGCRIVGRVCVGNRNGLLVPNTTTDQELQHLRNSLPDSVKIQRVEERLSALGNVVSCNDYVALVHPDLDRETEEILTDVLKVEVFRQTVASNVLVGTYCAFSNRGGLVHPKTKIQDQDELSSLLQVPLVAGTVNRGSDVIGAGMVVNDWSAFCGLDTTSTELSVIESVFKLTDAPQSAIVTDMRESLLETVS
PF01912	Lgig_Metazoa	MAIRAQFEGNNEIGVFSKLTNAYCLVAIGGAENFYSIFEGELGETIPVVHASIAGCRIVGRLTVGNRHGLLVPNTTTDQELQHIRNSLPDSVKLQRVEERLSALGNVIACNDYCALVHPDLDRETEEIITDVLKVEVFRHTVASNALVGSYCTFSNQGGLVHPKTNMADQDELSSLLQVPLVAGTVNRGSDVLGGGLVVNDWIAFCGLDTTATEVSVIESVFKIGDNQPSKIQTEMRDSLLDSLT
PF01912	Bflo_Metazoa	MAVRAQFENSNEIGVFAKLTNAYCLVCIGGSENFYSVFEAELSDVIPVVHTTIAGCRIIGRMTVGNRNGLLVPATTNDQELQHIRNSLPDSVRIQRVEERLSALGNVITCNDYVALVHPDLDRETEEILADVLKVEVFRQTVSDNVLVGSYAALSNQGGLVHPKTTIEDQDELSSLLQVPLVAGTVNRGSDVVGAGMVVNDWIAFAGMDTTSTELSVIESVFKLGDAPQGAVTTAMRDSLIDSMT
PF01912	Nvec_Metazoa	MAVRAQFENSNEVGVFSKLTNAYCLVAIGATENFYSVFESELSDVIPVVRTSIAGCRIIGRLCVGNRHGLLVPSTTTDQELQYIRNALPDQVKIQRVEERLSALGNVIACNDYVALTHLDLDMETQEILADVLKVEVFRQSLASNVLVGSYCALSNQGGLVHPRTSIEDQDELSSLLQVPLVAGTVNRGSDVIGAGLVVNDWSAFCGSDTTSTELSVIESVFKIGDAQQSSI
PF01912	Dpul_Metazoa	MAVRVQFENNNEVGVFAKLTNAYCLVAIGGSENFYSVFESELSDTIPVIHTSVAGCRIIGRLTVANRHGLLLPNSTTDQELQHIRNSLPDSVKIQRVEERLSALGNVIACNDYVALVHPDLDKETEEVLADTLNVEVFRHTIAGSVLTGSYCAFSNQGGIVHPKTTVADQDELSSLLQVPLVAGTVNRGSDVIGAGLVVNDWSAFCGFDTTATEISVIENVFRLNEANQPSVITTDMRESLIETLT
PF01912	Gpro_FungiChy	MAVRAQFENSNDIGVFASLTNAYCLVAIGGSENFYSAFEGEVGDAIPVVHASIGGTRIVGRLTVGNRNGLLVPNTTTDQELQHLRNSLPDKVAIQRIEERLSALGNVVACNDYVALVHPDIDRETEEIIADVLQVEVFRQTIAGNVLVGSYCALSNRGGLVHPRTSIADQDELSSLLQIPLVAGTVNRGSPNIGGGLVVNDFAAFAGVDTTSTELSVIESIFKLQQAGPSYVVNDLRNQLID
PF01912	Apar_IchthyosporeaIchthyophonida	MAVRGKFENSNEVGVFAKLTNSYCLVATGGSESFYSVFEGELGDVIPVIHASVAGCRILGRLTAGNRHGLLVPSTCTDQELQFLRNSLPDTVRMQRVEERLSALGNVVACNDYVALVHPDLDRETEEIIADTLGVEVFRQTVADNVLVGSYCALSNQGGLVHPNTSVQDLEELSSLLQVPLVAGTVNRGSDVIGAGMVVNDWVAFCGMDTTSTELSVIESVFRLNENMGPGTIVKEMRGPLID
PF01912	Ihof_IchthyosporeaIchthyophonida	MAVRGKFENSNEVGVFSKLTNSYCLVAHGGSESFYSVFEGELADVIPVVHASVAGCRIIGRLTVGNRHGLLVPNTTTDQELQYLRNTLPDSVGIQRVEERLSALGNVIACNDYVALVHPDLDRETEEIIADTLKVEVFRQTIADNVLVGSYCALSNQGGLVHPNTSVQDLEELSSLLQVPLVAGTVNRGSDVIGAGMVVNDWVSFCGMDTTSTELSVIESVFRLNESMGPNTIVNEMRGPLID
PF01912	Ihou_IchthyosporeaIchthyophonida	MAVRGKFENSNEVGVFSKLTNSYCLVAHGGSESFYIGRLTVGNRHGLLVPNTTTDQELQYLRNTLPDSVGIQRVEERLSALGNVIACNDYVALVHPDLDRETEEIIADTLKVEVFRQTIADNVLVGSYCALSNQGGLVPLAGTVNRGSDVIGAGMVVNDWVSFCGMDTTST
PF01912	Cfra_IchthyosporeaIchthyophonida	MAVRGQFENSNEVGVFSKLTNSYCLVALGGSESFYSVFEGELGDIPNFPVIHATIAGTRIIGRLTAGNRHGLLVPSTTTDGELQFLRNSLPDGVKLQRVEERLSALGNVIACNDYVALVHPDLDRETEEIIADVLNVEVFRQTVAEHVLVGSYCTFSNQGGMVHPNTSVQDLEELSSLLQVPLVAGTINRGSDVLGGGMVVNDWVAFCGLDTTATELSVVESIFKLSDAAGPGRVANEMRDSLIDTF
PF01912	Sarc_IchthyosporeaIchthyophonida	MAVRGQFENSNEVGVFSKLTNSYCLVALGGSESFYSVFEGELGDIPPIIHCSIAGTRIIGRLCAGNRHGLLVPSTTTDGELQFLRNSLPDGVKLQRVEERLSALGNVIACNDYVALVHPDLDRETEEIIADVLNVEVFRQTVAEHVLVGSYCQFSNQGGMVHPSTTVQDLEELSSLLQVPLVAGTINRGSDVLGAGMVVNDWVAFCGMDTTATELSVVESIYKLNDAAGPGRVANEMRDSLID
PF01912	Rall_FungiCry	MATRTQFENSNDVGVFSKLTNSYCLVAIGGSENFYSAFESELYNTIPVVHASISGTRIIGRLTAGNRHGLLVPNTTTDQELQHLRNSLPDSVAIQRIEERLSALGNVIACNDYVALVHPDVDKETEEIIADVLQVEVFRQTIAGQVHPKTSVEDQEELASLLQIPLVAGTVNRGSDVIGAGLVVNDWCAFTGLDTTSTELSVVESIFKLQQMQPNAIVHEIRDALID
PF01912	Cowc_Filasterea	MAVRAQFESSNDIGVFAKLTNSYCLIGAGASENFYSVFEGELADRIPVVHTSIGTVRIIGRLTCGNRNGLLVPASTTDQELQHIRNALPDSVVIQRVEERLSALGNVIACNDYVALVHPDLDRETEEIIADTLQVEVFRQTVAGHVLVGSYCAFSNRGGIVHPYTSVQEQDELSSLLQVPLVAGTVNRGSEVIGAGLCVNDWSAFCGLDTTSTELSVIESIFKLQDAQPSAIVNQMRSSLIDGM
PF01912	Dcos_ChoanoflagellataStephanoecidae	MAIRTQFEGSNEVGCFAKLTNKYCLVALGASETFYSVFEGELADTIPVIHTSIGGTRLVGRMVVGNRHGLLVPASTTDQELQHIRNSLPDDVRIQRVEERLSALGNVIACNDYVALVHPDLDRETEQILQDVLKVEVFRQTVAENMIVGSYCVFSNQGGMVHPRTSVQAQDELSSLLQVPIVAGTVNRGSDVVGGGMVANDWVAFCGMDTTSTELSVMESVFKLQDAQPMAIAEEMRDPLID
PF01912	Spom_FungiDik	MALRAQFENSNEIGVFSNLTNSYALVALGGSENFYSVFEAELGDVVPVVHTTIGGTRIIGRLTCGNRKGLLVPSSTTDNELQHLRNSLPDPVKIQRVDERLSALGNIVACNDYVALVHPDIERETEEIIADVLDVEVFRQTVAGNVLTGSYCALSNQGALVHPRTSIQEQDELSSLLQVPLVAGTINRGSDVIGAGLVVNDWCAFAGLDTTATELAVCESIFKLQDAQPSAIISNRDTLVESYT
PF01912	Cneo_FungiDik	MAVRTQFENSTDIGVFSKLTNSYCLTALASSTNFYSVFEAELADVVPIVHTTIGGTRIIGRLTAGNRHGLLVPSSTTDQELQHLRNSLPPTVAIQRVEERLSALGNVIACNDYVALVHPDIDRETEEIIADTLKVEVFRQTIAGNVLVGSYCALSNQGGLVHPKTSRSELDELSSLLQVPLVAGTVNRGSEVIGAGLVVNDWCAFTGLDTTATEVSVIEATFRLQGQTSTAVINEMRDSLID
PF01912	Mbre_ChoanoflagellataCraspedida	MAVRAQFEGSNEIGVFAKLTNSYCLTALGGSENFYSIFESEVGEVVPVIHCTVAGTRVIGRLTAGNRHGLLLPNTTTDQEMQHIRNALPDAVKVQRVEERLSALGNVIACNDHVALVHPDLDRETEEIIMDTLNVEVFRQTVANHVLVGSYCALSNNGGLVHPHTSIQDQDELSSLLQIPLVAGTVNYGSDVVGGGMVVNDWAAFCGLDTTSTEISVIESIFKLQDRKPMSIMEEMRDPLLD
PF01912	Sros_ChoanoflagellataCraspedida	MAVRAQYEGSNDVGVFATLTNSYCLTALGASENFHSVFESEVGEVIPVVHCSIAGTSIIGRLTAGNRHGLIVPNSTTDQELQHIRNALPDAVKVVRVEERLSALGNVIACNDYVALVHPDLDRETEEIIMDTLNVEVFRQTIADNVLVGSYCALSNRGGLIHPGTSVTDQDELSSLLQIPLVAGTVNRGSDVIGAGMVVNDWVAVCGMDTTSTELAVIDQIFGFQE
PF01912	Umay_FungiDik	MAVRCQFENSSEIGVFARLTNAYCLVAIGGSANFYSTFEAELADVIPVVHCSIAGTRLVGRLTVGNRHGLLVPSTTTDQELQHLRNSLPESVAIQRVEERLSALGNVIACNDYVALVHPDLDRETEEIIADVLKVEVFRQTVGDNVLVGSYSAISNQGALTHPRTSLQDQDELSSLLQVPLVAGTVNRGSDLIGAGLVVNDFAAFCGTDATATEISVIESVFRLTGAANTGDAVNQLRDALVDT
PF01912	Hnan_ChoanoflagellataAcanthoecidae	MAIRVKAEGSSDIGVFALLTNKYCLVGLGSSENFYSVFEAELGDTMPVVHCSINGTKIVGRMAVGNRHGLLLPISTTDAEMQHIRNALPDDVKIQRVEERLSALGNVIACNDHVALVHPDLDRETEEIIQDVLKVEVFRQTVADQSLVGTYCIFSNMGGLVHPTTPIADQDELSSLLQVPIVAGTVNRGSPVIGGGMVVNDWAAFTGMETTSTELSVIESVFQLQDAAPMEIAEEMRDPLLE
PF01912	Tadh_Metazoa	MATRAHFEKSCEIGVFSKLTNTYCLTAIGASENFYSVFESELAETIPVIHTSLAGCRIIGTLCVGNRHGLIVPSSATDQELQHIRNCLPDAVKVQRVEERLSALGNVVACNDYVALVHPDLDVETEEIIADTLRVEVFRQTIAGNVIVGNYCAFNNAGGLVHPRTNTNDLDELSSLLQVPLAAGTVNRGSDAIGAGLVVNDWCAFCGMDTTSTELSVIESIFKISGAQPSAITGHLRDTLVDT
PF01912	Ocar_Metazoa	LGASANFYSTFESELADTVPVITSTIGECRIVGRMCAGNRHGLLVPNSTTDQELQHIRNSLPDAVKLQRVEERLSALGNVIACNDYVALVHPDLDRETEEILSDVLQVEVFRQTIADNVLVGSYCAFSNRGGLVHPKTTVAEQDELSSLLQVPLMAGTVNRGSSVVGAGFVVNDWIAFCGLDTTSTELSVLENVFKLGDSHPAAALAGAAIRDSLVE
PF01912	Clim_Corallochytrea	MALRIQFENNNDVGVFALLTNTYCLVPIGGSENFYSTFENELGDVMPIVHTTIGGTRLVGRMAVGNRHGLLLPSSTTDQEMQHLRNSLPDAVKIQRVEERLSALGNVITCNDYVALVHPELDKATEEILADVLKVEVYRQTVADNVLVGTYCKLSNRGGIVHPKTPVADQKELSSLLQLPLVAGTVNRGSDVVGAGMVVNDYIAFCGMDTTSTELNVIESIFNLQDQQPSNIVNQMKASIIDSLP
PF01912	Clii_Corallochytrea	MALRIQFENNNDVGVFALLTNTYCLVPIGGSENFYSTFENELGDVMPIVHTTIGGTRLVGRMAVGNRHGLLLPSSTTDQEMQHLRNSLPDAVKIQRVEERLSALGNVITCNDYVALVHPELDKATEEILADVLKVEVYRQTVADNVLVGTYCKLSNRGGIVHPKTPVADQKELSSLLQLPLVAGTVNRGSDVVGAGMVVNDYIAFCGMDTTSTELNVIESIFNLQDQQPSNIVNQMKASIID
PF01912	Mvib_Filasterea	MALRSSYEGSNDVGVFSTLTSSYCLVAVDGSENFYSVFESELTDVIPVVHTSISGCRIVGRLVAGNRHGLLVPNMTTDQELQHLRNSLPEQVVIHRVEERLSALGNVISCNDYVALVHPDIDRETEEIIADTLKVEVFRQTIGDCSLVGSYSSLTNRGGIVHSATTPADLDELSSLLQIPLVAGTVNRGSAVIGAGMVANDWLAVCGLDTTSTELSVIESVLKLQDQQPMALKTDMRDSLIE
PF01912	Bana_Breviatea	MAIRAQFENSSEIGVFARLTNSYCLVSRGGSANFYSVFEGELAGHIPVVQCHVADTRCIGRLCVGNSHGLLLPNSCSDQELLHIRNSLPDSVVVQRIEERLSALGNVVACNDYVALVHPEIDRETEEMIADILKVEVFRATIAGNGLVGTYCALSNNGGLVHPRTSVQDQEELASLLQVPLVAGTVNRGSDVIASGLCVNDWIAFCGLDTTSTELAVIETIFRLQQGRPAAFGTDMR
PF01912	Mlei_Metazoa	MALRTQFQNSSEIGVFVKLTNSYCLVPIAECEAFYSVFEGELSDFIKVIHTTIGGCRVVGTLCVGNKNGLLVPNSTTDKELQHLRNSLPDSVKIARVEERLSALGNVVACNDYVALVHPDLDRETEEVLADTLGVEVFRQTLADQVLVGSYSCLTNQGGMVHPKTPIEDQDELSSLLQLPLVAGTVNRGSGAIGSGMVVNDWIAFCGRDTTATEISLIESIFKLSDKGPNNINQMRSVLVE
PF01912	Hmag_Metazoa	MAVRARYENSNEIGVYAKLTNTYCMVGVGASENFYSVFEGELSDVIPVFHASLADTAIVGRLSVGNRHGLIVPNTTTDQELQHIRNSLPSGVKLQRVEERLSALGNVVACNDYVAIVHPDLDRVHPKTSIENQEELSSLLQIPLVAGTINRGSEVIGGGMVVNDWCAFCGLDTTSTELSVIESIFKLGDSQQSAITSSMRAALIESMT
PF01912	Falb_Discicristoidea	MPVRAQFENSNDIGVFARLTNAYCLVGIGASENFYSVFQAELGNSIPLVRTTIADTRIVGRMTVGNRHGLLLPNSTTDQEMQHIRNSLPDSVQITRLEERLSALGNVIACNDYVALVHPDIDRETEEIIIDTLKVEVFRQTVAGEVLVGAYCVLNNNGGLVHPNTSIEDQDELASLLQVPLLAGTVNRGSAVLGGGLIVNDWASFAGAITTPSESAVIDSVFQFQDSGHTSAVNDAWVRDSLID
PF01912	Ttra_Apusozoa	MAIRTQFENSSDVGVFSILTNSYCVVPIGGSENFYSTFEAELVDEVPVIHASIAGCRVLGSLAVGNSRGLLVPSTTTDQELQHLRNSLPDKVVVQRVEERLSALGNCVACNDYVALVHPEMDRETEEIIHDVLGVDIFRETVAGSALVGTYATFSNNGGLVHPHVTVEEMDQLASLFQVPITAGTVNRGSDMIGAGVVVNDWIAFAGIDTTAPEISVIDDIFKLQGTAPSSMIEEMRGALIDSLA
PF01912	Ddis_Amoebozoa	MATRLQYENSCDVGVFLKLTNKYCLVGQCGSKQFLHTVENRLADHIPVVETSIAGTRIVGRLSAGNKNGLLLPNTCTDQELQQIRNSLPDDVVVQRIEEKFSALGNCIATNDYVALVHPDIDRETEEIIADVLGVEVFRQTVSGNVLVGTYCALTNQGALVHPMTSIADQDELSSLLQVPLVAGTVNRGNECVAAGCVVNDWTAIVGADTTATEISVIESIFALQGSKPSNIINNIRNSIVDNV
PF01912	Ppal_Amoebozoa	MATRTQYENSCDIGVFSKLTNAYCLVGQCGSKQFFRTFEKQLADHIPVFEASIAGTRIIGRLSVGNSKGLLLPNTATDQELMHIRNSLPDSVTVQRVEERFSALGNCIAANDHVAVIHPDLDRETEEIIADVLGVEVFRSTISGNVLVGTYCAVTNNGALVHPNTSAEDQDELSALFQVPLVSGTVNRGNECISAGLVVNDWTAFVGNDTTATEISRIENIFSLQRGVPSNMLGQVRDSIID
PF01912	Awhi_IchthyosporeaIchthyophonida	MAVRVKFENSCEIGVYALLTNSYCLVANGGGEAFFSTFATELEDHIPVVHCSIGGCRIIGAQIVGNKNGLLLPSTTSDQELQHLRNSLPDSVAIQRIEERHSALGNVITCNDYVALIHPNLDRETEDIIADVLGVEVFRHTVANSVLTGSHCVLSNRGCLLPPFASVQDMQEVASLLQVPVAAGTINRGQTCLGGGMVINDWCAFVGYETTSMEISQIENVFQLVEGQNPEHIMNDMRSSLIE
PF01912	Pgem_IchthyosporeaIchthyophonida	MAVRVKFENTSEIGVYSMLTNSYCLVASGGGDAFFSTFASELEQHIPVVHTSIGGCRIIGAQVIGNKNGLLVPSITTDQELQHLRDSLPDAVAIQRIEERHSALGNVITCNDYVALIHPNLDRETEEIIADVLGVEVFRHTVANSVLTGAHCVLTNRGCLMPPFASVQDMQEVASLLQVPVAAGTINRGQECLGGGMVVNDWCAFVGQDTTSMEISQIENVFQLVEGQNPDHIMSSMRNNLI
PF01916	Acas_Amoebozoa	VMVKAEPLPEGTPIVQGYDFNKGLDYEALMASLKTTGFQATSFGQAVDEVNRMVEPVTEKDDEESRDPEYRKGVKCTIFLGYTSNMISSGVREIIRYLCQHKLVDVIVSSAGGIEEDFIKCFAPTYCVGDFSLDGCALRLKGQNRIGNLIIPNENYVKFEEWILPVLDAMVLEQKEKGEIWSPSKMISRFGKEINNPESVYYWCWKNDIPVFCPGLTDGSIGDMIYFHSYQNEGLIVDIAQDIRGINNKAVYAKKSGMIILGGGLIKHHICNANLMRNGADYTVFINTGQEFDGSDSGARPDEAKSWGKIRYDASPVKMYADASMVFPLLVAETFVK
PF01916	Ddis_Amoebozoa	TLGVGGSLSNRKKSNSSLGISKVRGYDFNEGVDFSKLFETYKTIGYQASAVGEAIDEINRMISWRLVDEPLKEGEDDDEERKVTRCKIFLGYTSNLVSSGVREIIRYLVQHSMVDVIVSTAGGVEEDFIKCLAPTYMGEFHLEGEKLRRKGLNRIGNLLVPNDNYCKFEDWIMPILDQMVEEQKTKGTVWTPSRVINRLGKEINHEDSIYYWAWKNDIPVYSPALTDGSIGDMMYFHSYNTPGLVLDIISDIRAINNHAVYSKKSGMIILGGGVIKHHICNANLFRNGADYSVFVNTGNEFDGSDSGARPDEAVSWGKIKLDAKPVKVYSEASIVFPILVAETFAK
PF01916	Ppal_Amoebozoa	IKGYDFNNGVDYGKLFESYINTGFQASSVGQAIEEINRMLNWRLSDEPLAEGEENNVEERKNTRTKIFLGYTSNLVSSGVRETIRYLVQHSMVDVLVTTAGGVEEDFIKCLAPTYLGEFSLPGADLRRRGLNRIGNLLVPNDNYCKFEDWIMPILDKMVDEQTNNGTLWTPSRVINRLGKEINNEESIYYWAWKNNIPVFCPAITDGSIGDMMYFHSYNKPGLVLDLITDIRNINNHAIYSKKTGMIILGGGVIKHHICNANLFRNGAEFAVYLNTGQEFDGSDSGARPDEAVSWGKIKVTAKPVKIYAEATVVFPILVAETFAK
PF01916	Mcir_FungiZyg	EGSVLIQGPDFNKKLSLSELLGSYKQIGYQGSSLGEAMEIIKEMRKWRLSDEAVLADEAPEYLDPEVRKKTKCKIFLGYTSNLVSSGLREIIRFLVQHKMVDVIVASAGGVEEDFIKCLAPTYLGEFALKGSDLRKKGLNRIGNLLVPNNNYCKFEDWVIPIFDKMLEEQKEQGITWTPSTMIERLGNEINDESSIYYWTSKNKIPVFCPAITDGSLGDMIYFHSYKNPGLVVDIAADIRAMNNQAVFAKKTGMIILGGGVIKHHICNANLMRNGADYAVYINTGQEFDGSDAGARPDEAVSWGKIRADSKSCKIYADATLVFPLIVAETFAK
PF01916	Rory_FungiZyg	QQEPTGALDAVFVESVEMPEGSVLIQGPDFNKELSLSDLLGAYKQIGYQGSSLGEAIEIVKEMRKWRLSDEPVAADEVQEYLDPEVRKKTKCKIFLGYTSNLVSSGLREIIRFLAQHKMVDVIVATAGGVEEDFIKCLAPTYLGDFSLNGSDLRKKGLNRIGNLLVPNNNYCKFEDWIIPIFDAMLEEQKKDNKIWTPSSMIARLGKEINDESSIYYWTYKNNIPVYCPAITDGSLGDMIYFHSYKNPGLIVDIAADIRSINSEAVFAKKTGMIILGGGVIKHHICNANLMRNGADYAVYINTGQEFDGSDAGARPDEAVSWGKIRANSRSVKVYADATIVFPLIVADSFAKEHHA
PF01916	Mver_FungiZyg	PDSTQAAVFVQSTEMPKDSIVIKGPDFNQTLSLDALLSTYISSGFQASAMGKAIEIINEMRSWRLADDPLPEKTEDLDPELLDPAYRASVKCKIFLGYTSNLVSSGVREVIRFLVQHSLVDCIVSSAGGVEEDFIKCLAPTYLGEFSLEGAKLRRQGLNRIGNLLVPNDNYCKFEDWVVPILDKILEEQKTEGAHWTPSSVINRLGKEINHEESIYYWAYKNNIPVFCPALTDGSLGDMIYFHSYKNPGLIIDIVSDIRNMNNQAVFAKKTGMIILGGGVVKHHICNANLMRNGADYAVFINTGQEFDGSDAGARPDEAVSWGKIRLDAKSVKVYTDATIAFPLIVSQTFAK
PF01916	Bden_FungiChy	QPPQMASQAVFVASAPIPENAILIQGYDFNQGVDYEKLMASLFTTGFQATSLGEAIQITNDMIKWRLSDEPIDENENEVYRDPETRSKTRCKIFLGYTSNLVSAGIRDIIRYLVQHRMVDVVVSSAGGIEEDFIKCLGPTYIGAFSLPGAELRKKGLNRIGNLLVPNDNYCAFEDWVMPVLDQMLKEQKEAGTIWTPSKMIKRLGKVIDNPQSIYYWAYKNDIPVYCPALTDGSLGDMIYFHSFKNPGLIVDIAADIRAVNNEAVHAKKTGMIILGGGVIKHHICNANLMRNGADYAVYINTGQEFDGSDAGARPDEAISWGKIRIDAKSVKVYADASVIFPLLVAETFAKKFD
PF01916	Spun_FungiChy	DTPSSAVQAVLVQSEPMPAQSVKVQGYDFNNGVDYSALLASYSRTGYQATSLGQAIDEINRMISWRLSDDPIAEDEQEQYLDPEVRSTTKCKIFLGYTSNLVSSGLREVIRYLVEHSMVDCIVASAGGVEEDIIKCLGPTYVGSFSLPGAELRKKGLNRIGNLLVPNDNYCKFEDWVMPVLDQMLKEQKEEGTIWTPSAIIRRLGKAIDNPESIYYWAYKNNIPVYCPALTDGSLGDMIYFHSYKNPGLIIDIAADIRAVNNEAVFAKKTGVIILGGGVIKHHICNANLMRNGADYAVYINTGQEFDGSDAGARPDEAVSWGKIRMTAQPVKVYADASIVFPLLVAETFAK
PF01916	Rirr_FungiZyg	MNYWKLFSNWVSSFSVGKAIELINKMRRWRLSDEPILPDETEEYKDPLIRSTTKCKIFLGYTSNLVSSGLREIIRFLVQHSLVDVIVTTAGGIEEDFIKCLGPTYLADFELNGSELRKNGMNRIGNLIVPNDNYCKFEDWVIPILDKLLEEQISKGIIWSPSKVINRLGKEINNPESIYYWAYKNNIPVYCPALTDGSLGDMIYFHTFKNPGLVIDIVSDIKSINQQAVFAKKTGVIILGGGIVKHHICNANLMRNGADYAVYINTGQEFDGSDSGARPDEAVSWGKIRMNAEHIKVYADATIVFPLIVAETFAK
PF01916	Ppol_Amoebozoa	GLDFDKLLESYNTIGFQATSFGSAVNEINRMVNWRLSDEPIAADESEDYKDPEVRKNIKCKIFLGYTSNLVSSGVRDVIRFLVQHKMVDVIVSTGGGIEEDFIKCMANTYVGDFNLAGARLRSQGLNRIGNLIVPNDNYCKFEEWLLPILDKAVEEQKTKGTVWTPSKLIHRLGKEINNEESIYYWAYKNNIPVFSPALTDGSIGDMIYFHTYKTPGFVLDIVEDIRRMNNEAVFAKHTGLIILGGGLIKHRICNANLFRNGADYAVDINTAQEFDGSDSGARPDEAVSWGKIKTTANPVKVYADATLVFPLLVAQTFAK
PF01916	Crev_FungiZyg	PASATSAVLVRSEGVSEGTKQIRGYDFEDGVDYNKLLGSYMTTGFQATSFGQAVEIVNKMRQWRLSDEPVAEDESSEERDPEYRRSVKCKIFLGYTSNLVSSGIRETIKYLAKNRMIDVLVSTAGGIEEDFIRCIAPTYLGDFNLQGRTLRNKGLNRIGNIIVPNDNYCKFEDWIIPIFDQALKEQQEDGVVWTPSKLIHRLGKEINHPDSIYYWAYKNNIPVYCPALTDGSLGDMLYFHSYRSPGLVLDVIQDIRAINNEAVFAKKTGMIILGGGLIKHHICNANLMRNGADFAVFVNTAQEFDGSDAGARPDEAVSWGKIKADADSVKVYADASLVFPLLVAQTFAK
PF01916	Apar_IchthyosporeaIchthyophonida	PEVSQAAVFMRSSVPENADTVVGYDFSQGVDYEKMFKSYLTTGYQATSLAQAINEINRMIKWRLSDEPIAPDADEEQRDPNYRAQRRCKIFLGYTSNLISSGLRETFRYLAQNRMVDVIVSSAGGVEEDFIKCLAPTYVGDFALKGLDLRKKGINRIGNLLVPNDNYCKFEDWVFPILDAMLHEQNTHGVRWTPSKMIARLGKEINNPESVYYWAYKHNIPVFCPAITDGSLGDMLYFHSFRNPGLVLDLVEDIRRINSEAVFASHTGMIILGGGVIKHHICNANLMRNGADYSVFINTGQEFDGSDSGARPDEAVSWGKIKITAEPVKVYTDATLVFPIVVAETFAK
PF01916	Ihof_IchthyosporeaIchthyophonida	PAITQVAVLMRSSVPENADIVRGYDWNQGVDYAKILDSYLTTGFQATNYGLAVQEINKMLNWRLSDEPITPETDDDMKDPKVRENVRCKIFLGYTSNLISSGIRETFCHMAKNRMIDVVVSSAGGIEEDFIKCLAPTYVGDFALKGAELRMKGINRTGNLLVPNDNYCKFEDWIFPILDAMLEEQNTQGVNWTPSRMIARLGKEINHPDSVYYWCYKNNIPVFSPALTDGSIGDMIYFHSYKNPGLRIDIAADVRSMNSQAVFAPKTGMIILGGGVVKHHICNANLMRNGADFSVYINTANEFDGSDSGARPDEAISWGKIKLNATPVKIYTEATLVWPILVAQTFAK
PF01916	Ihou_IchthyosporeaIchthyophonida	AVLMRSSVPENADIVRGYDWNQGVDYAKILDSYLTTGFQATNYGLAVQEINKMVEIIHLAVYHQIDVVVSSAGGIEEDFIKCLAPTYVGDFALKGAELRMKGINRTGNLLVPNDNYCKFEDWIFPILDAMLEEQNTQDVRSMNSQAVFAPKTGMIILGGGVVKHHICNANLM
PF01916	Amac_FungiBla	PESVAAAVLVQSASLEGEPIAKGPDFNQPQTLHSLLNGYKSIGFQGTSLGRAMEIVDKMRNWTLADEPIKPDEEEDLKDPKARKQVKCKIFLGYTSNLVSSGLREVIRYLAEHNMIDVIVTTAGGVEEDIIKCLGETYLGDFHLKGKDLRSKGLNRIGNLLVPNDNYCKFEDWVIPVLDECLAEQQKTGQPWTPSRLIDRLGERINDPRSIYYWCHRNKIPVYCPAITDGSLGDMIYFHSFRSPGLIVDLVADIRSINNQAVYAKKTGMIILGGGVVKHHICNANLMRNGADYAVYINTGQEFDGSDAGARPDEAVSWGKIRIDGESAKVYADATIVFPLIVANTFARR
PF01916	Cang_FungiBla	PDSVAAAVLVHSTSLEGTHAVVQGPDFNQPLSLNQLLASYSNIGFQGSSIGQAIDLINKMRNWRLSDEPINPDETDESLLDPAIRSQVKCKIFLGYTSNLVSSGLREIIRYLAQHKMIDVIVTTAGGVEEDIIKCLGKTYMGDFSLKGRDLRMKGLNRIGNLLVPNDNYCKFEDWVMPVLDECLKEQQEKGTVWTPSTLIDRLGAKINHPDSIYYWCHKNQIPVYCPAITDGSLGDMIYFHNFKNPGLIIDLVRDIRSINDQAVFAKKTGMIILGGGVVKHHICNANLMRNGADYAVLVNTAQEFDGSDAGARPDEAVSWGKIRLDGESVKVYADAAIVFPLLVAGTFAKR
PF01916	Ttra_Apusozoa	NAPEVARSSVLSPSSSTPETAEVKGYDFNNGIDYEAMLKAYATTGFQATNLAKAIDQVNAMLKWRLSDEPVDDDETEDYTDPEVRARTRCKIFLGYTSNLVSSGLRETLRYLVEHRMVDVVVSTAGGIEEDFISCLAPSYLGDFALKGKTLRDAGLNRIGNLLVPNNNYCAFQDWIFPILDAMVEEQKTHGVVWSPSKMIHRLGKEINDERSIYYWAYKNNIPVFSPALTDGSIGDMIYFHSYENPGLVLDIASDIRRMNNQAVFAKKTGAVIFGGGLIKHHILNANLMRNGLDYCVLVNTAAEFDGSDAGARPDESISWGKIRANADPVKVYAEATLVVPLLVAETFAK
PF01916	Adig_Metazoa	SSGVRETIKFLLANNMVDCVVTTAGGIEEDLIKCMEPSYLGDFSLPGAELRKKAINRIGNLIVPNNNYCKFEEWILPIWDKMLEEQNAQGTKWTPSKVISRLGKEIDHPDSVCYWAYKNNIPVFSPALTDGALGDTLYFHSYKNPGLVIDIVQ
PF01916	Ctel_Metazoa	MAQQAVLVPSGKLPVDPIEVKGYDFNDGVDYHKLLQSYATTGFQATNFGRAVEEINRMIAKKQEPYPLSEGEDPIDSSGRAKTNCKIFLGFTSNMTSSGVRDTIRYLCQHNMVDCVVTTAGGVEEDFIKCLAPTYVGDFNLKGKDLRLNGINRIGNLLAPNDNYCKFEDWIMPILNAMLKEQQEEGAMWTPSKMIARLGKEIDNPDSIYYWCYKNNIPVYSPALTDGSIGDMLYFHSFKNPGLVLDIIEDIRGINSLAVHAKHTGMVIIGGGLIKHHIANANLMRNGADFSVYVNTAQEFDGSDSGARPDEAVSWGKIKITATPVKVYLEDYVICPFL
PF01916	Nk52_Ichthyosporea	PSIAAEAVLVKSASMPEGSETVSGYDFNQGMDYNRLLESFATTGYQASNFGRAVEEVRGMLAWRPSEAELDEWVSGEQDESTRAEQREKLKEETRTKIFLGYTSNLISSGVREVIRFLVEHHMVDVVVSTAGGVEEDFIKCMGKTYLGEFNLRGAELRKKGINRIGNLLVPNDNYCKFEDWLMPILDAMLVEQERDGVKWTPSRMIHRLGKEINHPESVYYWAYKNNIPVYCPAITDGSLGDIIYFHSFRNPGLVIDLVEDIRGMNNQAVFARHTGMVILGGGLVKHHICNANLMRNGADHAVFINTGQEFDGSDAGARPDEAVSWGKIKMSAAPVKVYGEATLLFPLLVAQTFAKQH
PF01916	Sros_ChoanoflagellataCraspedida	EQATDAQQAVLLRSEPMPEDAVKVKGYDFNQGVDHDKLLQSFLTTGFQATNLGLAIEEVQRMVRSLMEPVKEGEDEELRDPEARKKVKTKIFLGYTSNMISAGVRDTIRFLVQHKMVDVIVTTAGGIEEDFIKCMADTYLGDFSLKGRDLRLKGINRIGNLLVPNDNYVKFEEWMMPILDQMLHEQKTEGAHWTPSRMIHRLGKEIDNPDSVYYWAYKNDIPVYCPALTDGSIGDMIYFHSYKNPGLVLDLVEDIRGMNKEAHFARHTGMIIIGGGLVKHHICNANLMRNGADHAVFINTAQEFDGSDSGARPDEAVSWGKIRLDARPVKVYGEASILFPLLVAQTFAKKFHADKTEEDED
PF01916	Mbre_ChoanoflagellataCraspedida	AAVLLRSAPMPEDAVKVKGYDFNQGIDHDALLESFARTGFQATSFGQAVDEINRMVGRQAGVSGIQPSARRKVRTTIFLGYTSNMISSGVRETIRFLVQHKLVDAVVTTAGGVEEDFIKCMADTYVGDFHLSGTALRKQGINRIGNLLVPNDNYVKFEQWMMPILDQMLHEQQNEGVVWSPSTMIRRFGKEIDNEESVYYWAYKNDIPVFCPAITDGSIGDMIYFHSVQNPGLIVDLVADIRAINYKAEFSKHTGMVILGGGLVKHHICNANLMRNGADHAVFINTAQEFDGSDAGARPDEAISWGKIRLDAKPVKIYGEASMIFPLLVAQTFARRV
PF01916	Cowc_Filasterea	AVLVTSTPMPADTPIIKGYDFNQGIDYEALLKSYKYLGFQGTSLGQAIDEVNRMLNWRLSDEPVLETDDEQHSLVDCIVTTAGGIEEDFIKCLGPTYLGEFSLKGADLRMRGLNRTGNLLVPNDNYCKFEDWLMPILDTMLAEQKTNGTVWTPSTIIHRLGKEINNEESVYYWAYKNNIPVFCPALTDGSLGDMIYFHSFKNPGLIVDIAADIAKINNMAVFAKKTGMVILGGGVVKHHICNANLMRNGADFSVYINTGQEFDGSDGGARPDEAVSWGKIKLTANPVKVYADATIAFPLLVGETFARKVFADKAKANQ
PF01916	Cfra_IchthyosporeaIchthyophonida	MSSTYSASADTAPPEMAQSAVLVQSEPMPENSRIIKGYDFSGPLDYHKLLQSYICSGFQATCFGQAVEEVKKMIQWRLSDEPITDLDDEDMRDPEVRKHVRCTIFLGFTSNLISSGVRETICYLAKNKMVDVMVSSAGGVEEDFIKCLAPTYVGDFNLKGKDLRLKGQNRIGNLIVPNENYCKFEDWLMPILDTLLHEQETQGVNWTPSKIIHRLGKEIDHPESVYYWAYKNNIPVFCPALTDGSLGDMIYFHSYKNPGLRVDIAEDIRKINTVAVKAKRSGMLILGGGVVKHHICNANLMRNGADYSVYINTGMDFDGSDAGAKPDEAVSWGKIKLTASPVKVTAEATLVFPLLVGETFAQIWEPRADL
PF01916	Sarc_IchthyosporeaIchthyophonida	AVLVQSEPMPTDAIVIKGYEFKGELDYHKLLQSYICSGFQATCFGQAIEEVKRMVCSLALWFLREQVRCTIFLGFTSNLISSGVRETLCYLTRNKMVDAMVSSAGGVEEDFIKCLAPTYVGDFHLKGRDLRLKGQNRIGNLIVPNENYCKFEDWMMPILDKLLEEQESQGINWTPSKIIHRLGKEINHPESVYYWAYRNSIPVFCPALTDGSLGDMIYFHSYKNPGLRVDIAEDIRGINSIAVKAKQSGMIILGGGVVKHHICNANLMRNGADYSVFINTGNDFDGSDAGAKPDEAISWGKIKIDAKPVKVTAEATLVFPLLVAETF
PF01916	Sdes_IchthyosporeaDermocystida	PSIAVSSVLVKSENLPLNTPIVSGYDFNATLDYSKLLSSYLTSGFQATNFGLAMKEIHQMLSWRLSDEPICEDENEELCDIQARQKIRCKIFLGYTSNLVSSGLRDIFRYLVQQKMVDVIVTSAGGIEEDFIKCLGPTFVGDFHLSGKNLRKRGLNRIGNLLVPNQNYCLFEDWLTPILDQMLLEQTVDGQNWTPSKIIHRLGKEINHPSSIYYWAYKNNIPVFCPAFTDGSLGDIIYFHSFKSPGLRIDLVEDIRNMNNQAVFARHTGMIILGGGVVKHHICNANLMRNGADYSVFINTGHDFDGSDAGAQPDEAVSWGKIKMDAKPVKIFSEATLVFPLLVAETFAK
PF01916	Hnan_ChoanoflagellataAcanthoecidae	AVMVESEAMPEGSVTVEGYDFNQGVDYHKLLESYIRTGFQATNFGRAVEEIKRMRKWRLSDEPIKPDEDPDLKDPEVRKNTKCKIFFGYTSNLISSGTRETIRYLVEHSMVDVVVSTAGGIEEDFIKCLAPTYIGDFKLDGQTLRKKGINRTGNLLVPNDNYVKFEDWMKPILDAMLVEQQRDGVVWTPSKMIHRFGKEIDDERSVYYWAYKNNIPVFSPALTDGSIGDLIYFHSFNNPGLVLDIAGDIRLINDEAANHKGRTGMIVLGGGVVKHHIHNANLMRNGADYCVVVSVAQEFDGSDAGASPDEAKSWGKIRAEAHPVKVVAEASLIFPLLVAETFARPEEE
PF01916	Dcos_ChoanoflagellataStephanoecidae	AKEAVFVVSEEMPEGSEVVQGYDFNEGLDYHKLLKSYTRCGFQATNFGLAVEEINRMRKWKLSDVPVTEDEDEEFKDPTVRQNVKCKIFFGYTSNLISAGTRESIRYLVQNKMVDVIVTTAGGIEEDFIKCLAPTFMGKFSLDGRTLRKKGINRIGNMLVPNKNYCLFEEWFMPILDKMLEEQKKDGIIWTPSTMIHRLGKEIDNPNSVYYWAYKNNIPVFCPAITDGSIGDMIYFHSFNNPGFIVDIAKDIRLMNDEAMSAKQTGMIILGGGIVKHHINNANLMRNGANFAVFVNTAQEFDGSDSGARPDEAISWGKIRVDANPVKVYGEASLIFPLLVAETFAQPE
PF01916	Colp12	PESVAAAVLVASTPMPTDSVEIRGYDFNKGFDFHELMKSYMTMGLQAHNFGVACDVVREMINWRLSHEPIGENESEDMKDPKVRENVRAKIFLGYTSNLISAGTREIIRYLVQHKMVHVLVTSAGGVEEDFIKCLAPTFVGDFRLDGANLRKKGLNRIGNMLVPNENYCKFEDWVIPILDSMLEEQKTQGTIWTPSKLIHRLGKEINHEDSVYYWAYKNNIPVFCPALTDGSLGDMIYFHSYKNPGLIIDIAGDIRAINSEAVYAPKTGMLILGGGVVKHHICNANLMRNGADLSVYINTGQEFDGSDAGAAPDEAVSWGKIKQGARSVKIHADASLVFPILVADTFAR
PF01916	Pbif_Breviatea	PGEAFDAVLGLRGKMPEGSEEVKGYDFNQGVNFEKLLDSYLTSGYQATNFGKAVEEIRKMIKWRLQDEPITENETEDFLDPAVRSRTRAKIFFGYTSNLISSGVRDTIRYLCQNKMVDVIVSTAGGIEEDFIKCLAPTFLGDFSLNGTELRKKGLNRIGNLIVPNDNYCKFEDWIMPIFDQMVKEQNENGVRWTPSKVIHRLGKEINHPDSVYYWCYQNNIPVYSPALTDGSIGDMLYFHSYRNLPENQLTIDLVADIRGMNNEAVYAKKTGVIILGGGLIKHHILNANLMRNGADFAVLVNTAQEFDGSDAGARPDEAISWGKLRLHSNPVKIYAEASLVFPLLIAQTFAKE
PF01916	Awhi_IchthyosporeaIchthyophonida	IPALAQASVLVESGEVPEGAEKVRGYDFEDGPDLQKVMDAFKHVGFQGTSFGNAIDEVNKMIKFRLSDDEITENTLSHQKDPEFRKKSRCKIFLGYTSNLISSGVRESIKYLAKNKMVDVIVSSAGGIEEDFIKCLAPTYLGDFGLKGSDLRSKGINRIGNLIVPNDNYIKFEHWINPILDQMLEEQKTGTNWTPSKMIARLGKEIGHEDSVYYWAQKNNIPVFCPAITDGSIGDMIFFHSYKNPGLKIDIAEDIRLMNNEALYASKSGMLILGGGLVKHHICNANLMRNGADFAVFINTGNEFDGSDAGARPDEAVSWGKISLDATPVKVYADATIIFPLLVAETFAK
PF01916	Pgem_IchthyosporeaIchthyophonida	KIPSLATDAVLVESCEVPEDTPKVRGYDFENGPDLQAVMDAYKNVGFQGTSLGNAMDRINEMLAWRLSDEEITADTLDEHKDPEVRKKTRCKIFLGYTSNLISSGVRESIKYLAKNKMVDVIVSSAGGIEEDFIKCLAPTFLGDFSLKGEELRKKGINRIGNLIVPNDNYIKFEKWIWPILTAMLEEQKTSGVNWTPSKIIHRLGKEINHEDSVYYWAYKNNIPVFCPSLTDGSIGDMLFFHSYKHPGLIVDLVEDIRLMNSEALYAVRSGMIILGGGLVKHHICNANLMRNGANYAVFVNTGQEFDGSDAGARPDEAVSWGKIALGASPVKVYADATIVFPLLVS
PF01916	Mvib_Filasterea	PDSVANAVLVESEEMPEDTPKIGGYNFDQGVDFDAIMASYMTMGFQGGHMGRAVQEINRMIKWRLSDEEVKESDELKTFEERSKVRCKIFLGYTSNLISSGLRETICFLAKHKMIDVIVSTAGGIEEDFIKCLAPTFVGEFSLPGKDLRARGLNRIGNMLVPNKNYCLFEDWILPIFDAMLREQREDGTVWTPSKVIWRLGKEIDNEESVYYWAYKNQIPVYSPALTDGSIGDMLYFHSYKNPGLVIDLVQDIRAMNNEAVFAPKTGMVILGGGIVKHHICNANLMRNGADFAVFVNTGQEFDGSDGGARPDEAVSWGKISLDAKPVKVYCDATLIFPFMVAQTFAK
PF01916	Tadh_Metazoa	MDNSTPSIAKEAVLVTSEAMPSDAEAVKGYDFNNGINHHSLLQSFRQTGFQATNFGLAIQEVNRMLELKAKPVSEKDKNQLTLDAAGSRPLSNCSIFLGYTSNLISSGVRESIRYVVEHNLVDCIVTTAGGIEEDFIKCLADTYIGDFRLPGRQLRDKGINRIGNLLAPNDNYCKFETWIMPILDQLVEEQNTHNINWTPSKIIARLGKEINNCNSVYYWAYKNNIPVFSPALTDGSIGDMIYFHSYRNPGLRIDIVEDIRRMNSQAVFALNTGMLILGGGLVKHHICNANLMRNGADFSVFVNTANEFDGSDSGARPDEAISWGKIKKTANPVKVYGEASILFPLMVAETFAPVVEKMKTADHD
PF01916	Nvec_Metazoa	EPPQIAVDSVLLKSEPMPDGSETVKGYDFNQGTDYHALLQSYKNTGFQAMHFGKAVDEINKMIAKKKEPYVPNTENPELDILPTGRPKNNCTIFLAYTSNMISCGVREVIRYLVQNNMVDVLVTTGGGIEEDFMKCLAPSYLGDFSISGEFLRKKGINRIGNLLVPNDNYCKLEDFIQPVLDKMLEEQQNEGINWTPSKFIARLGKEINHPESVYYWAYKNNIPVFSPAITDGAIGDAIYFHSYRNPGLKLDIAEDVRLVNNHAVFSKNTGIIILGGGLVKHHVCNANMMRNGADYAVYVNTAQEFDGSDSGARPDEAVSWGKIKATATPVKIYGESSLIFPLLVAETFAR
PF01916	Aque_Metazoa	APPLAQEAVLAQSQPMPEGSQEVKGYSWDSVTDGKVDYSAMLEAYLTSGFQATNFGLAVQQVNDMLKLRSQPIDESSLKPALDEPGDRPVTNCTIFFGFTSNMISSGSRETIRYLVKNNMVDVIVTTAGGVEEDIIKCLGPTYLGDFSLSGRDLRKRGINRIGNLLVPNDNYCKFETWLTPILNQMLEEQKNDGVVWSPSKMISRLGKEIDNPESVYYWAHKNNIPVFCPALTDGSIGDVIYFHTYSKPGLILDIVQDIRRLNRQALRAINSGMIILGGGLTKHHICNANLMRNGADYSVFVNTASEYDGSDSGARPDEAISWGKIKETAKPVKVYADATLILPLLVAQSFAK
PF01916	Nspp_Discicristoidea	PSVAQAAVLVPSATAATSEVLAGAPTVRGYAFEPAPAAVDYDALLRSLGTTGFQGTAFERAVRVVNDMLAWRLSSEPVPADEADEWRDPARRAATRCTVFLAYTSNLISSGVRDIIRFLVQHRFVHVLVSTAGGVEEDFIKCLAPTYVGDFELDGRTLRKQGLNRIGNLLVPNDNYCKFEDWVTPILDQLLKEQKEQGIVWTPSKIIHRLGKEINHPDSVYYWAYKNNIPVFCPALTDGSLGDMIYFHSYRNPGLVVDIAGDIRAINDIALHAKKTGMIILGGGVVKHHTANANLMRNGADFSVYINTAQEFDGSDSGARPDEAVSWGKIKMDSHPVKVYGDATVIFPLLVAQTF
PF01916	Rall_FungiCry	AQEAVLVKSENIDSEIVSGYDFNNFSGDYSEVFSSYYRTGFQATSLGKAFDITTKMLNDREKCKIFLGYTSNMISSGLREQFRYLAEHKMVDCIVTTAGGIEEDFIKCLAPTYLGDFSLDGKSLRQKGQNRIGNLLVPNDNYCKFEDWLTPILDEMLELQKKENINWTPSKLINFLGKKINNLESVYYWAYKNDIPVFCPAITDGSLGDMIYFHTYKNPGLVIDVVEDIRRINSMAVKAEKTGMIILGGGVVKHHICNANLMRNGADYAVYINTGQEFDGSDAGARPDEAVSWGKIKGDAESVKIYSDATLVFPILVGETFHK
PF01916	Bflo_Metazoa	QIKGFDFNKGVKLDEVVKHFLTTGFQASNFGMAIEQINKMHRSKPANLSPEEEKLDPIYRPRSDCTIFLGYTSNMVSSGIRETIRFLAQHRMIDCIVTTAGGIEEDFIKCFAPTYLGDFYLKGKELRPKGLNRTGNLLVPNDNYCLWEDWATPILDKMLEEQKQHGTLWTPSKLIARLGKEIDNEESIYYWCYKNEIPVFSPAITDGSIGDLLFLHAYRNPGLVLDIVEDIKMMNSIAAHSKHSGMIILGGGLPKHHIHNANFMKGGADYGVFINTAQEFDGSDGGARPDEAVSWGKIKTSATPVKIFADATLVFPLLVSQTFAK
PF01916	Dpul_Metazoa	MATNSNDTSSVPQKAADAVFVPTQEHGFNNKVQGYDWSQGLDYGKLIGSYITTGFQATTFGLAVNEVNKMLAKRTEPIPENLGLDEFEEDLFIKRKSNCTIFLGYTSNMCSSGIRDTIKFLVQNKLVDCIVTTAGGVEEDFIKCLAPTFVGNFELKGSTLRESGINRIGNLVIPNDNYCKFEDWVMPLLDEMVTEQKEKGTKWTPSRIIEKLGRAINNPESVYYWAAVNNIPVFSPALTDGSLGDMMYFHSYKNPGLVVDILEDLKRLNTMAVKASNSGMVILGGGLIKHHICNANLMRNGADFAVFINTACDFDGSDSGAKPDEAVSWGKIKKDATPVKVCADASLVFPILVAETFAK
PF01916	Hmag_Metazoa	SEIKSGELPLSTAKDAVFIKSVDYSDGLSVEGFDFNEGICYEKILLSYKRTGFQALNFGRAVEEILKMLHVRDELPVSVSEFIDEMYRPKTNCTIFLGYTSNMASSGIRDIIRYLVEHKLVDVLVTTAGGIEEDFIKCMAPTYLGDFNLKGESLRRQGLNRTGNLIVPNTNYCLFEEWFQPILDEMLEEQNKNNFNWTPSKMIAKMGKIINNPKSIYYWAYKNDIPVFSPAITDGSIGDNIYFHSYRHPGLRIDIAEDIRKINNLAVYAKNTGQIIIGGGLIKHHICNANLMRNGADFSLYINTSCEYDGSDSGAGPDEAVSWGKIKVNATPVKIFGDATLIFPILVAETFAKYVEKKKNNK
PF01916	Ocar_Metazoa	ARDAVLVPTTVDLAKDSSVVRGYDFNEGIDHHALLESFAHTGFQASNFGKAVVEIKRMIEAKKQPMSDEKKATLAQIRDKGERPIDSCTIFFGYTSNLISCGTREIIRFLAEHNMVDCIVTTAGGIEEDFIKCMAKTYLGEFSLKGAELRAQGINRTGNLLVPNDNYCKFEEWVTPILDQMLKEQNENKTNWTPSKIIDRLGKEINNPESVYYWTHKNRIPVFLRVDLVEDLRRLNTMSVQSVNTGMMILGGGLIKHHICNANLMRNGADFSVYVNTAQEFDGSDSGARPDEAVSWGKIKTSAKPVKVYGEASIIFPLLVAETFARERQDEGKKEE
PF01916	Pisp_FungiNeo	ADETDEFKDPEVRKNTKCTIFLGYTSNLISSGLREVFRFLVKHNMVSCIVTTAGGVEEDFIKCLGPTYMGEFNYKGETLRKKGLNRIGNLLVPNDNYCKFEDWIMPILDQMLKEQKEDNVIWSPSKFIHRLGKEINNEDSVYYWAYKRNRNGADYSVYINTANEFDGSDAGASPDEAVSWGKIRLTAHPVKVCCEATTVFPFIVAQTFAKYYFDHQDEFQKEEQK
PF01916	Clim_Corallochytrea	PAQAADAVLVKSEMLPGYDTVIKGYDFNDSKNGQVDYCALLDSYLTSGFQAQNFGEALSIIDEMLRYRRDDSENDEPNNEEVEPKPKKATIFMGYTSNLISSGLRETLRFLVQHKLVDCIVTTAGGVEEDVIKCLGPTYAGEFALRGEDLRKKGLNRIGNLLIPNDNYCSFEDWVTPILDKLVEEQTTKEEGCFTPSEIIERLGLEINDESSVLYWAAKNRIPIFCPALTDGSLGDMIFFHSYRNPGLKIDIARDLRAVNTMAMKADRTGMLIFGGGVIKHHICNANLMRNGADYAVYVNTSQEFDGSDAGARPDEAVSWGKIRMGARSTKIYADATLIVPLLVA
PF01916	Clii_Corallochytrea	PAQAADAVLVKSEMLPGYDTVIKGYDFNDSKNGQVDYCALLDSYLTSGFQAQNFGEALSIIDEMIRYRRDDSENDEPNNEEVEPKPKKATIFMGYTSNLISSGLRETLRFLVQHKLVDCIVTTAGGVEEDVIKCLGPTYAGEFALRGEDLRKKGLNRIGNLLIPNDNYCSFEDWVTPILDKLVEEQTTKEEGCFTPSEIIERLGLEINDESSVLYWAAKNRIPIFCPALTDGSLGDMIFFHSYRNPGLKIDIARDLRAVNTMAMKADRTGMLIFGGGVIKHHICNANLMRNGADYAVYVNTSQEFDGSDAGARPDEAVSWGKIRMGARSTKIYADATLIVPLLVAR
PF01916	Cneo_FungiDik	VIFPSEEIPEDAVDVKGPDFNKPIDLEALLKSYETIGFQATGLARAIQVADGGLFETEQRKRRTDPNEPLTLFIGYTSNLISSGLREILKFLAQNRLVDCFVTTAGGVEEDFIKCLGKTILGDFHLDGAGLRKKGLNRIGNLLVPNSNYCAFEDWVVPILDKMVEEQEEQGVKWSPSSVIRRLGKEINNEDSVYYWCYKNDIPVFCPALTDGSLGDMLYFHTYKSSPLQLSIDIVADIRRLNDMSVKSKKAGMIVLGGGVCKHQIANAMLFRNGADYAVYINTGQEYDGSDSGARPDEAVSWGKIRAGAESVKVYADATLVFPLVVAATFGR
PF01916	Umay_FungiDik	ASAQAAVFVQSQPLPADTPQVVGPDFEHQDPNDLLRLLESMSKVGFQASSVSKAIEIVQEMRQWRLSNDAAYLASEDADKPSLSDAQNTQCRIFLGFTSNLVSSGLREVIKFLVKNKMVSALVTTAGGIEEDLIKCLGPTYLGDFALDGATLRKQGLNRIGNLLVPNDNYCKFEDWVMPILDAMRAEQGDNSHAWSPSRVIERLGKEINDESSILYWAAKNQIPVFCPALTDGSLGDMIYFHSYKNPGLTIDLVKDIRRLNDLSVKAPKAGMIILGGGVCKHQIANAMLFRNGADFSVYINTGQEFDGSDSGARPDEAVSWGKIKSAANGGKSVKVYCDATIIFPMIVAATFAK
PF01916	Spom_FungiDik	AVFVASSKPSDLTTEVVGPDFNKYDERKKAGGPGITVEELVESYGKIGFQATNLHDAVTIINEMRNWRDPNPPEEKSDRATIFLGYTSNLISSGVREVLRYLVQHKCVDVIVTTAGGVEEDIIKCLGPTYVGDFHLDGKNLRAKGLNRIGNLIVPNDNYCRFEEWIFPILNKMVEEQETLGTHWTPSSFIRRLGKEINDESSVLYWAYKNNIPIYSPALTDGSIGDMLYFHTYKATPRPLVLDIVADIRNMNTHAVRANKSGIIILGGGVVKHHICNANLMRNGAEWSVYINSANEFDGSDAGARPDEAVSWGKIRGDAKKVKVYGEVSLLFPLIVAATFAK
PF01916	Falb_Discicristoidea	ATEAVMVASSAIPDEAVKVAGYEFNQGVDYDQLFASFGTTGFQACHFSDAVRIINKMRAWRLSDEPIKEDDYDEFADPEFRKNYRAKVYLAYTSNMISSGVRETIRFLVEHKMVDVIVSSAGGVEEDIIKTFAHMYLGRFQMDDRQLRREGLNRLGNLIVPNDNYFEEWVNPILDKMVDEQKATGVVWTPSSMIRRLGLELNDDSSVLTWAARNDIPIFCPALTDGSLGDMIYFHNYRKPGLVVDLVGDIRKINDSTVYARKTGMIVIGGGVVKHHTLNANLMRNGADWAVFLNTAQEFDGSDAGARPEEALSWGKVRLDADYVKIVGDASFFFPLLVSQTFAKDFKKKADE
PF01916	Skow_Metazoa	APSTATDAVLVKSDEMPSDSVKVKGYDFNKGIDFHALLESYKTSGFQATNFGLAVEEINKMLRKKSEPIEDQEQADTYKSLNPCNRKKTNCTIFLGYTSNLVSCGVRETIRYLVQHNMVDCVVTTAGGIEEDLIKCLGPTYVGDFQLSGRMLREKGINRIGNLLV
PF01916	Mlei_Metazoa	SKAAVYVESQDFDGPKVKGYDFSQASIDYDALFESYNTMGFQATNFGAAVSMINDMLAAKSCPFVGHEMSDIRQESGCTIFLGFTSNMISSGVRENIKFIVKENLVDVLVTTCGAIEEDIMKCLAPHQIGRFDFDGKTLRSKGLNRIGNLIVPNKNYELFEQWLIPILNFMYDEQMENKEIWSPSKMIQLMGKRINNEDSVLYWAWKNKIPVFCPAIIDGAVGDVMYFHSYEKEGLIMDLTQDIRLINRTAVGADKTGMIILGGGVIKHHIANANLMRNGADFTVYINTAQPFDGSDSGATPDEAVSWGKIKHGCKEPVKIYCEATLVFPLIIAQTFAKYHKNQSANKK
PF01991	Acas_Amoebozoa	MNQEQVRKQIENMKAFIMKEAQEKRDEILAKADEEFSMEKARLLQAERMKIAKDYERKEKQLETNKKIAYSNQLNQARLKVLKAREDIVVHLKERAQDRLAELGKPGQEYETLLQQLILQALIKLDETKVSLRCRKDDESSVKSVLSAAVEAFKQKSHKKDVKVTIDTVNYLPAGSCGGVVLSAHDGKIVCDNTLDQRLALAFDANIPKIRSLVFSS
PF01991	Ddis_Amoebozoa	MDDTQVNAQLDQMKNFILQEAQDKANEIKTKATQEFTSEKGRIFQNEKIKIIKEYEKKQKLIEVQKKINLSNELNKSRLSVLKVREECLRDVIKEAQKKLATISDDKDKYQTILKNLIYQGFVKLNENKIQVVGRKEDAGLLEKATTEAAAQYKKNVGKSIDVSVDKERFLPQGPKSDYNGPTCCGGVILSALEGRIICKNTLDSRLEICFDQLTPVIRTQLYGASTSRKFF
PF01991	Ppal_Amoebozoa	MDDSQISAQLKQMQNFILNEAQDKADEIKAKATQEFTSEKGRIFQSEKLKIIKDYEKKVKQIEVQKKINLSNELNKARLSVLKVREECLREVVSEAHKKLAVISQDKERYAAVLKNLILQGLNKLGEDQVLIVFRQEDLPIADKACSEAAAAYKAKSGKSVTVTVDKQRFLPPGPKADSKGPTCCGGVILSALEGRIICKNTLDARLDICFDQMTPIVRTTLYGPTESRKF
PF01991	Ppol_Amoebozoa	MDESQVQAQLQQMQNFIMQEAEDKASEIRNKAQEEFSIQKSNIVVVEKQKILKEYERKEKQIGVKKKMDASNELNQSRLKVLKSRDDVLQKLLVEAQQQLAKIGQSPQYPEILEKLILQLIRMAEPKVSIVGRKEDRTIIEGVLNNVKQEYKEKTGNSVELKIDENNYLPPGPTPGSGGVILSAQEGKIICRNTLDARLGLAFEQRLPDIRTTLFGKSAGRVHF
PF01991	Amac_FungiBla	ADCSAVRSLRNAVAFIKQEALEKAKEIKIKADEEFNIEKAKLVRQETATIDALFQKKMKQAEVQRKIAASNYSNKAKVRVLQLRHDLLGHVHTDTRAQLRALVERHDEYKPLVEDLLVQGLLDLLEPEAVVLCLARDVELVESVLDAAAHRFQKMAQARVKVTVDKSNPLPDSEIGGVIVTSANGRIKVLNSLEARLQIACEKLLPDIRVKLYGAPPNRRFF
PF01991	Cang_FungiBla	LQDDEVQNEMKKMVAFIKQEALEKAKEIKIKADEEFNIEKAKIVRQETATIDALFQKKMKQFEVQRKIAASNHTNKAKVKVLQKRHDLLAQTFNDTRAQLETLTADQPKYKELIKGLLVQSFLELLETDVVVQCVERDVLVVNSVLDEAKKQYEEIAGAKVNATVDTSSPLPASAIGGVIVSSNGGRIKVLNSLESRLQIASDQLLPDIRVTLYGVPPNRRF
PF01991	Bden_FungiChy	LNDNEVAQEMNKMVAFIKQEALEKAREIKVKADEEFNIEKGKFVRQETVAIEAFFQKKLKQAEVSRKIAQSNLINKNRLRVLQARQTVLNEMFSEAKSALSKISEDKATYQELIKNLLLQGMFQLMEAKVTVNCRTIDVSLVKSAIESAKTEYTKQLKIPVEITIDEANPLPESSHGGVTLSAVGGRIKCSNTLESRLELLQEQMLPEIRVVLFGHSANRRFF
PF01991	Spun_FungiChy	LNDNEVAQEMSKMVSFIKQEALEKAREVKIKADEEFNIEKAKIVRQETVAIEAFYQKKMKQAEVQRKIAQSNHVNKCRLKVLQARQQVLNELLAEARSRLVEISNDRSKYQTLLKDLILQSLYQLMEREVKVNCRQKDVDLVKEAIEQAKQAYEKEVGSSPHVVIDEANPLPEKSAGGVVVSAHEGRIRVSNTLETRLELLAEQMLPDIRILLFGPSENRKFY
PF01991	Gpro_FungiChy	GLNDQEVQQEMNKMTSFIKQEALEKAREIKVKADEEFNIEKAKLVRQETLNIEAFYEKKQKQAEVQKRITQSTHVNKSRLRILQSRQTLLNQLMEEAKQKLFTLSADPKSYQVLLKDLTLQGLYQLMEKDIIIQVRKKDVALLEAVLPAAKKEFEEALKIPSNATIDKNNFLPENSAGGVVLFALGNRIKCSNTLESRLEILGETALPDVRTMLFVVSTSRKF
PF01991	Rall_FungiCry	LTDEEVQNEMKKMVAFIKQEAIEKAREIQVKADEEFNIEKAKLVRQETLAIEANYARKFKQAEVSRKIAQSTHFNKARLKVLQTRDQMIEELYNDAKSRLPTLAKDHQQYQAILNDLVLQCFYQLMETNIVIQCRRQDEEMVKNAIQYACEQYNSQLHRNVNATIDSQYLFDTCAGGIIASANDGRIRCANTFESRLELLSQQMLPDIRLMLFGPSENRKF
PF01991	Mcir_FungiZyg	DDEVFNEMKKMVAFIKQEALEKAREIKVKADEEFNIEKAKIVRQESLNIEAVFERKIKQAEVQKRIAQSNHINKARLRILQERQQVLDDLFQETDNLIHEISKDEDKYATLMEGLILQGAYALMEDDVLIKCREQDVDQVNSAKERAAEKYEETMKSKPNFEISEEYLPASSAGGVIMTGLNGKITVDNTLGARLDIAKEEMLPQIRVALFDHSPSRTFF
PF01991	Rory_FungiZyg	LNDDEVFDEMKKMVAFIKQEALEKAREMKKMADEEFNIEKAKIVRQESLNIEAVFERKIKQAEVQKRIAQSNHINKARLRILQERQQVLDDLFEEANKGIHDVSKDEEKYSTLIENLILQGAYSLMEPEIVIRCREQDVDIVNSALDVVSDKYEEALKSRPNFIVSEEYLPESSAGGVILSGHNGRITVDNTLDARLEIAKEEMLPQIRVALFDHSPNRTFF
PF01991	Rirr_FungiZyg	ALNDDEVLNEMKKMVAFINQEAIEKAREIKVKADEEFNIEKAKLVRQESNNIEATFQRKIKQAEIQKKITQSNMINKTRLKVLQVRQQMLEEVFNETVSQLNKVSQDEVKYRDLLKNLILQGLYQLMDDQVKAIVRKCDKELANNAIQAAAKIYKESTKRNINVELDKENNLPDDCAGGVILTSHFGRIRINNTLEERLTLAQEELLPEIRVLLFGPSPNKK
PF01991	Pisp_FungiNeo	ALNDSQVKDEMEKMVSFIKQEANEKAREIKVKADEEFNIEKAKIVRQETIAIEALYQKKAKQAEIQKKIAESNRNNKTRLQILQARQQYLNKINEEAHKALVDYANNDPKYAETIKNIILQSLYQLMEEDITITCREKDLDVVKKAVEEVIPAYKEKTGKTATVKYSPNYLPAASAGGIIMAGFGDRIVINNTLENRLEIASDELLPAIKTMLYGASESRKY
PF01991	Ccor_FungiZyg	SLNDEEVYAEMKKMVAFIKQEALEKAREIKVKADEEFSMEKAKIVRQESIAIEANFDKKLKQVEIQKRITQSTLTNKARLDILATRQTKVDEIFEIASQALLKLQDDKEKYHKLLVEYILQGFYSLMEKKVTVQCRQKDEAEVQAAAKEASDLFEKEIGYPVEVVIDSAYLKESAAGGVVLSCLDGKIRVHNTLESRLDMLKEQMLPQIRYNLFGPSPSRKF
PF01991	Mver_FungiZyg	ALNDEEVFSEMRKMVAFIKQEALEKAREIKVKADEEFNIEKAKLVRQEAINIDAAFQRKVKQADVQRRIAQSNNINKSRMTILLTRQQMLDDLFAESRNQLLEVTKDTARYEKFLADALVQAFFRLLESEVTVTYRKADKAAIEKLLPDVKARYEEATKQSIKVTLLDEHLPADSAGGVIVAGNGGRTICNNTPEARLAILEEDMLPDVRNMLFGQSPNRKF
PF01991	Cneo_FungiDik	ALDDNEIQSEMNKMVAFISQEAREKAREIQVKADEEFAIEKAKIVRQESLAIDAQFEKKRKQAEVSWKISQSTAINNSRLRILQSRNDHLETLFDEANKRVMELSAGDRYKDALVNLILEVLLKLLSADITLSHRPKDTELVEKSAQEAQKRYKDIAGRESNISFDPSLSDDSPGGVIGTSMGGRIKVDNTLEERLRILEEKMLPELRHDLFGPNENRKFY
PF01991	Umay_FungiDik	MNDEEVLSEMKKMVAFIKQEAVEKAREIQIKADEEFAIEKAKIVRQEAINIESQYDKKIKQAEVAQKIAQSNQTNKSRLKILQTREQHLQSLFDAAREKLDGIAKDQDKYKKLLAELILQGLLLLMEPKVTVTVKSSDVQLAQDAAKQAENDFKEKSGKTTSVTVQEGLDKGSAGGVLLAGHAGKITINNTLDERLRLLEDRMLPEIRLDLFGPNQNRK
PF01991	Crev_FungiZyg	LNDEEVFSEMNKMVAFIRQEALEKAREIKVKADEEFNIEKAKLVRQESINVEGQFQRKVKQAEVKQRILTSTLINKSRLEVLQERQEMLDSVFVQAQQALKKLPEDKDKYAKLLIDLCLQAFLQLKDATVTVRGRKADLDLLKSAVPKAEELYKEKTTKDISASVVEDSPLPDSVLGGVRVSALGDRINVDNTLQARLDLSSNRMLPQLRDVLFGQSPNRKF
PF01991	Nspp_Discicristoidea	LNDDQVRLEMNKMVSFIRQEAQEKSQEIRAKAEEEASIERANLVQQEKMKIAALYERKGKQLATQKKIAFSNKLNAARLKVLQMRDSMVEQVFAEAKKNLGSITQNQEAYRKLLEGLIVQGLFQLMEKEVVITCRRQDVALVKSALAPAAKRYEADMHQAVQLGVNEASFLKDDCAGGIELSVPDGRIRCTNTLDSRLELLQQEMLPDIRTMLFGKNLNRAF
PF01991	Adig_Metazoa	MALNDAEVRKQIEHMMQFIEQEAKEKVDEIDAKAEEEFNIEKGRLVQQERLKIMNFFEKKEKQVELQKKIQRSNQLNQATLKKLRAQDDHIKGILDEAVKRLGEVTKDTPRYEQVLKGLITQGLFQLLEPAVTVRCRQQDLSLVKKVKVAAIEDYKNATKKTTEITVDEQSFLPSDCAGGIELLAKQGRIKVVNTLESRLEMMSRQMMPEIRETLFGVNERRVF
PF01991	Nvec_Metazoa	MALNDAEVKKQIEHMMKFIEQEAKEKAEEIDAKAEEEFNIEKGRLVQQERLKIMNYYEKKEKQVELQKKIQRSNQLNQSRLKVLKSQDDHIKRILDEAVERLGKVTQDQGKYQQIIQGLITQGLYQLLESKVLIRCRKQDVSLVKAVFGPATEEYKKQTKKEIELTVDEQNFLGPDCAGGIELHAKQGKIKVVNTLESRLEMLGRQMMPEIREILFGRNKGRHF
PF01991	Awhi_IchthyosporeaIchthyophonida	MALSESEVKKQIQHMVSFMEQEAAEKANEIMVKAEEEFDIEKGRIVQQEKRKIQLMYEKKEKQIDVQRKIVYSNELNKNRLKVLSEQNENLIAILDDAKANLGSISSDESRYSKLLEKLILEGMFAIYEDSCVIKCRKADQSLVETATKVAAKEYEQTAKKPVATKVVVDLADDCAGGIFVCNANDRIKCDQTLETRLEAVSHELLPSIRMTLFGPSKTRKYLD
PF01991	Apar_IchthyosporeaIchthyophonida	MAFSDQEVNKQIQHMVSFIEQEAAEKANEILVKAEEEFNIEKGRIVQQEKLKVMSLYEKKEKQVDIQRKIVYSNELNKHRLQVLQAKNNHVQALLEEARDRLVNVTKDAAKYRKFLSGLILEGCYVMLDSEILVVARKSDADVVKGLIPEVQGKYKEATGKDVKITLAQETLAENSSGGVIVTSVDGRIRCEQTLEKRLDTIAQTMLPQIRIMLFGRSASRK
PF01991	Ihof_IchthyosporeaIchthyophonida	MAFNDQEVNKQIQHMVSFIEQEAAEKANEILVKAEEEFNIEKGRIVQEEKLKVMGIYQKKEKQVDVQRKILYSNELNKNRLEVLQCKHNQVTELLDEVKSLLSTVTDDKEKYKNLLSALILEACYTMIEPELLLEVRETDMSLVESVFGDVQDKYKTVTKREVKLSFAPDQLPANSCGGVVVTTKDGRTRCDQTLEKRLDTISQTMIPQIRIMLFGQSASRKY
PF01991	Ihou_IchthyosporeaIchthyophonida	MAFNDQEVNKQIQHMVSFIEQEAAEKANEILVKAEEEFNIEKGRIVQEEKLKVMGIYQKKEKQVDVQRKM
PF01991	Sarc_IchthyosporeaIchthyophonida	MALSNQEVNKQIQHMVSFIEQEAAEKANEILVKAEEEFNIEKGRIVQQEKLKVMSQYERKEKQVDTQRKIVYSNQLNKSRLQILQARENHVNNLLEEAKKSLADIGNDQGKYGDVLKGLILEACYTLTETTVLVKTREADKALVEKQLDVVKKEYEERTKLSLELKISDEYIPSDSAGGVIVSNGNGRITVDQTLEERLAYIGERTLPAIRTMLYGLSEGRIFF
PF01991	Pgem_IchthyosporeaIchthyophonida	SEAEVNKQIRHMVSFMEQEAAEKANEIMVKAEEEFNIEKGRIVQQEKKKIQSTYEKKEKQVDLQRKIVYSNELNKNRLQLLESQNKHVNAVIETCRLELQKTIQNKSKYQELLTKLILEGMFSLLEDNFVIECRKVDQPLVEAAYSPAKNQYNEATKKSCTVKISPNYLPDSHAGGVYVCNGNERIKCDQTLESRLEAIGHEMAPSIRLGLFGPSKSRVHFD
PF01991	Sdes_IchthyosporeaDermocystida	MALSDTEVNKQIQHMVAFIEQEAAEKANEINVKAEEEFNIEKIRLVQQEKLKIMQNYDKKEKLVEVQKKILYSNQLNASRLQILEMRDKHVENCTNTALEELKKSSQNEDQYKKLLSGLIQQCLFQLMESIVLLTCRKVDVHLVESVLKEATKDYVSVSKLPCEVVVHKDVFLPEDCAGGIECCSKDGRIICKNTLETRLQQCAQEIMPDIRMTLFG
PF01991	Nk52_Ichthyosporea	MALNDSEVNKQIQHMVAFIEQEAAEKANEINVKAEEEFNIEKIRLVQQEKLKISEAYEKKEKLVDVQKKILYSNQLNASRLQVLESRDSHVNKCINDSLGQLKKGTQDPNQYKKMLNGLIQQCLFQLMEPRVILKCRKADVSLVESAAPEAVKAYTNATNKQCQITIQKDSFLPEDCTGGVECFSVDGKISCNNTLEARLHQVAQAAMPQIRKTLFN
PF01991	Ocar_Metazoa	MALSDSDVEKQIQHMIAFIDQEAREKADEIAAKAEEEFSIEKGRLVQQEKLKIMAMYEKKDKQIELQRKIQRSNHLNQSRLRILKQRDDQIKQLLEAARGRLSDVTKDTACYQNLLKGLIVQGLFQLLECHVVIRCRKADVSLVKAVFSSAVHDYEKGTKKSVKIVVDEASFLGSEVSGGVVLLAQEGRIKVENTLDSRLDLLSRQMMPEIRMRLFGANPNRKF
PF01991	Tadh_Metazoa	MALSDTEVQKQIHHMMAFIEQEAKEKADEIDAKAEEEFNIEKSRLVQQEKLKILGFYEKKEKQIELQRKIQHSNMLNQSRLAILKERENLIKAIMEDTRVKLGAATKDQEKYKGLLQGLITQGLFQLLEKTVIVRCRQADLKLIKEVIGDAVKDYKNASKRDIVVNVDIKEFLGSEISGGVELLTPSGNIKISNTLESRLESLYRQMLPEIRTTLFGANEGRRF
PF01991	Bflo_Metazoa	MALSDADVQKQIKHMMAFIEQEANEKAEEIDAKAEEEFNIEKGRLVQMQRVKIMEFYEKKEKQVEQQKKIQNSNLLNQARMKVLQAREDHIKSILEDCRQRLGEVTKNPVKYRKVMEGLMVQSLCQLLEPAVTLRCRQVDVKLVKDLTPQVITTYKGLTKKDCKITVDEQNFLGSDVSGGIEFLSPNNRIKVTNTLESRLEMMSTQMMPEIRTTLFGSNPNRKF
PF01991	Skow_Metazoa	MALSDADVQKQIKHMMAFIDQEANEKAEEIDAKAEEEFNIEKGRLVQQQRVKIMEFYEKKEKNLELQKKIQNSNLLNQARLRVLKNREDHVSAILEEGRQRLGTVTQNQEQYRKLLEGLTTQGLFQMLENNVTIRCRQQDVDLVKSILPSVLDTYKKSTGRNCNVVIDTKSFLPADISGGIVLLAQKGKIKVVNTLESRLALISNQMLPVIRTALFGENPNRKF
PF01991	Ctel_Metazoa	SLSDADVQKQIKHMMAFIDQEANEKAEEIDAKAEEEFNIEKGRLVQQQRVKIMEFYERKEKQIELQKKIQSSNLLNQARLRVLKSREDHLKTLLEEAQVRLGQLTRDPSGYKKVLEGLITQGALQLMEEVVTVRCRQDDLPLIQAVIPISQQQYKSISGKDIRLVVDQDNFLSPDTSGGVELFVQKGKIKVENTLEARLAMLSYQMLPELRQMLFGANPNRKF
PF01991	Lgig_Metazoa	MALSDADVQKQIKHMMAFIEQEANEKAEEIDAKAEEEFNIEKGRLVQQQRVKIMELFERKEKQVELQKKIQSSNLLNQARLRVLKAREDHVRDVLEEARRRLGQVTKDQNKYRGILEGLIAQGLFQLMEQNVVVRCREQDVDLVREVAPGAVQKYKEAMKGKDVYVNVDNENFLSPNSSGGVEVVAQGGKFLVENTLDSRLSQMSGQMLPKLREMLFGRNPNRRF
PF01991	Xtro_Metazoa	MALSDADVQKQIKHMMAFIEQEANEKAEEIDAKAEEEFNIEKGRLVQTQRLKIMEYYEKKEKQIEQQKKIQMSNLLNQARLKVLKARDDHISELLNEARQRLSRVVKDTARYQMLLDGLILQGLFQLLEPRVLIRCRKQDFPLISASVQKSIPTYKAATKQGVEVIIDQENHLPPEIAGGVELYNGDGKIKVSNTLESRLDLIAQQMMPEIRVALFGANTNRKF
PF01991	Cowc_Filasterea	MALNDEEVDKQIKHMVAFINQEANEKATEMNFKAEEEFNIEKGRLVQQEKIKISAMYERKEKQVDIQKKISYSNELNQSRLRILSERDKHIQSIFNETQQQLAGISSNPDKYRKLLEGLLGQAFHQLLEENVTVRARKVDIALVEAAIPAAVKEYAVSTKKTVNVTVDKQNFLAADIAGGVEVSARGGKISVVNTLENRLKLVYKQMLPEIRSSMFGESTTRKFF
PF01991	Aque_Metazoa	MALSDDEVEKQIRQMKQFISQEANEKADEILVKAEEEFNIEKGRLLQTEKLKIDNYYDRKEKQVELQRKIQHSTLLNQARLSVLKAKDDHIKRILEEARQKIGEITRDIPRYQQLLKDLITQGLYQLLEKEVLIRCRKQDYNLIKAIYESAVLAYKKGTGNDCTVTLDDKEFLPPDCSGGIDMYTQQGKIKLTNTLESRLELLSGQMMPEIRSMLFGDNPSRHF
PF01991	Hmag_Metazoa	MGLNDEEVKKQIDHMMAFIHQEAKEKAEEIDAKAEEEFNIEKGRLVQQERLKIMALYEKKEKQIDLQRKIDRSNYLNVARLRLLETQNQYIQEILEDARSQLGKVTKDKNHYQKVLTGLLTQSLFQLLEPVAQIRCREADVELIKKLLDQELLGLKEKQKKETALILSSIAFLSSMQLEKKLYLAWFLHAAGGLELLAKEGRIKVTNTLESRLELLSRQMLPEIRETLFGKSSTRKFF
PF01991	Dpul_Metazoa	MALTDSDVQKQIKQMMGFIEQEANEKVEEIDAKAEEEFNIEKGRLVQQQRLKIMEFYERKEKQVELQKKIQSSNLLNQARLKVLQAQQQHIQNLLAEARTRLGKSSSDRANYTRVVCDLIIQALFQIMEPNVTIRCREIDLELVESVLPEAIAKYTEAMHKPCHITIAKENYLPADTCGGVELCAFHGRIRVNNTLENRLEMIAGQMLPEMRTKLFNANPNRKFF
PF01991	Clim_Corallochytrea	IMALSDEEVTRQIRQMVAFIEQEAAEKANEISVKAEEEFNIEKGKIVQQEKLKIMQQYERKQKNANIDRKIQYSNALNKSRLQVLKAKEDTIEELIEKARRDLSNLAKDSGKYSKLMESLVLEGCFGVLENEMVVVCREQDKNVVNGVLSGAQKRYTEATGKNVSLAISSTYLPKDSAGGVEVSNKDGSIKSMNTLEERLEFAARELQPELRTTVFGENPER
PF01991	Clii_Corallochytrea	MALSDEEVTRQIRQMVAFIEQEAAEKANEISVKAEEEFNIEKGKIVQQEKLKIMQQYERKQKNANIDRKIQYSNALNKSRLQVLKAKEDTIEELIEKARRDLSNLAKDSGKYSKLMESLVLEGCFGVLENEMVVVCREQDKNVVNGVLSGAQKRYTEATGKNVSLAISSTYLPKDSAGGVEVSNKDGSIKSMNTLEERLEFAARELQPELRTTVFGENPER
PF01991	Colp12	MALSEEEVSNQIKHMVAFISQEAQEKANEIAVKAQEEFTIEKGKLVQNEKLKLQTLYQRKEKQVAVQRKIAYSNELNQCRLQVLKAREQNVSAVVAEAQSRLTSVTKDAAKYKTLLEGLVAQVLLKLLEDTVVIRCREADVALVESAIPGAIKIYKDTYKPKNDPKVTVDKKSFLPANAAGGIEGLTANGNIKCINSLEARLENAARTLLPDIRVILYGPTPTRKF
PF01991	Mvib_Filasterea	MALNDDEVAKQIQHMVAFIKSEATEKCQEIEAKANEEFSIEKGRLVQQEKLKITQMYERKEKQIDVKKRIAYSNELNIARLRTLKARDEHIKKILAEAQVALGNVANDPAKYKKLMQDLLCQALSQLLEDEVVVRCRATDVGLVQSVTAAAAASYSALVKGKTVKITVDASNPLPSTNSGGLIVSTVDGKIMVENTLEDRLQLVATQLLPELRTILFGKSKTRVF
PF01991	Cfra_IchthyosporeaIchthyophonida	VSFIEQEAAEKANEILVKAEEEFNIEKGRIVQQEKLKVMAQYERKEKQVDTQRKIVYSNQLNKSRLQVLQARENHVTNLLEKSKAELHETAKDKSKYIPMMKGLLIEACYALTEPTVKLICRSSDKDLVEEFLSDVESKYKKATNLPIKFSFSEETLPKEGSGGLIVTNENGRIRIDQTLEERLATIAEKTAPAIRTMLYGLSEGRTFFD
PF01991	Mlei_Metazoa	MAIPDTEVERQIQQMIQFIDHEADEKEVEILAKADEEFNIEKGRLVEQEKQKIRAFYEKKEKNAELQKKIQLSNLQNQARLKLLKQREDHLDEVVIKTTEKLRTMANDVGKYQAMLQGLITQGLCQLLEPNVIIRCRQNDIQLVKEVLDKATKQYTELSKLNVNIKVDEKNFLASDIAGGVQLSARDGKLLVSNTLEARLDQIVKQKIPEIRTMLYGNNPNRRF
PF01991	Mbre_ChoanoflagellataCraspedida	MALDDQQVSEQIKQMVAFIESEAREKVEEIRAKAEEEFNIEKARLVQEETIKINQQLERRAKQVETQQKIEYSNKLNVARLEVLKAQEEALKSVTEQATKDISDITKDKAKYKTLLQDLLTQCLCQLLEPEATVRVRKQDISLIKEVINGAKKAVKDKTGIDVKLTVDEEHCLDEECGGGVEVAVTDRIRVTNTLKRRLELAVQQLMPALRLHLFGEQGTRAFF
PF01991	Sros_ChoanoflagellataCraspedida	MSLNQEQIEQQIAHMIKFIESEADEKVTEIKVKAKEEFDREVARMVKDEERKIVAMYERREKGMETQKRIAYSNKLNAARVKVLQAQDEYLQHIVSDAKEEVKKLAGNKKKYSKLLRDLITQGLCSLLETQVDLMCRKKDVALVKEVLSDAVADFKSKTKLDCTVNVNEKNFLNDDCGGGVELSVRGNTKVTNTLDKRMDMAVQQLMPAIRYKLFGASTSRAHF
PF01991	Spom_FungiDik	MSLSDEQVQAEMHKMVSFIKQEALEKAKEIHTLSEEEFQVEKAKIVREQCDAIDQTYDMKLKRASMAQKIAKSNVLNKSRLEILNSKQKVIDDIFSRVEKKLDGIEQKKDAYTKFMADLIVQAMELLGEPVGIVYSRQRDAEIVKAAIPKATEVLKSKNGSIDYELDAETDDFLNDSVLGGVVLVGLGGKIRVDNTLRARLEIVKEEALPEIRRLLFGENPNRKF
PF01991	Dcos_ChoanoflagellataStephanoecidae	SLTEAQMQQQIDHMVKFIEREGQEKAEEIDTKAGEDFNIEKVRLVQTEKKKMMALFERRAKQAEVQEKIEYSNQLNIARLKVLKCQDEHLTAIFEKTRNKLATIVKDDGKYKELLRQLVLQAALTLLETKVYVRCRKCDVQALKNTFDYCKKEVKSQAGLDLEIILDESEYLPDTSGGGVEMYVDNGRIKITNTLENRLNLACEQTLPAVRNILLGIGNGNRRF
PF01991	Hnan_ChoanoflagellataAcanthoecidae	GLTDAEVGKQINHMVAFIEKEGLEKAEEIDTKAEEEFNIEKVRLVQTEKKAIMKLTERKTKQAEVDKKIAKSSQLNAARLKILQMQDQHLTDVFAKTSQQLNNVATTPEYANLCEQLLVQGLVALIEDKVEIRCRKGDIGVVKKCFPSAQKSYTEHTGKKVTLTLNEKDYLPDTCCGGVELRVGDSYRMSNTLENRLELAFDKILPAVRNILFGIGTGSR
PF01991	Pbif_Breviatea	MNDQEVKLQIKQMVSFIKQEAHEKADEVMVKAEEEFNIEKTRIVQDSSSKLQEEFELKKKEIENRKRITHSLAVKDSRLKILEEEERLLRKVFKETSKQLQTVSESAEYDELLVGLIVQGLEKIDEKEIEIQCRECDKAKVEKALLKATAQFKKNHFDVSATISSNYLPPPPSKQNKHGCAGGVILSALRGGIKCNNTLEARFAIACHDLLPQVK
PF01991	Falb_Discicristoidea	FFALMDTKVNVVCRAKDAALVKELIPEAVAAYEKEALGQKMEATVCTRNTLPEDSAGGVLAYTPGGKVRISNTLESRLELLQQDV
PF01991	Ttra_Apusozoa	VQRQVEHMTRFFLAEARERVLEIETDAEEQFCIEHAMLVERAVATISSEFERKRNQAEVASKIRVANIKNAARLAVLRERNSSLQELFQKARRKLAAKGTGEGYQALFEKLLMQALIKVMEPKVVVNVREADLALAKKVIPGVVAEYEEKTRTKIEIKLDEKRFLPASPLEVEDGAPSCCGGVLVSARKGKIMCSNTLDTRLEIAYENLLPQVRSMLF
PF02167	Acas_Amoebozoa	QTRSFATSAGASAKRLHPNVLGLVIGAGAVGAAAGTLISRARCSDDVLVAPAYPWSHKSEWKSYDVASLRRGHQVYKEVCAACHSLNYIAWRNLIETLYTEEEVIAMAAETEVEDGPNDDGEMFTRPGKPTDYLPRPYPNEEAARSANAGATPPDLTEMVKAREQGADYIFALLTGYMPAPAGLNVREGLYYNPYFPGGAIGMPPPLNDGMLEYEDGTEASVSQMAKDVSAFLCWTARPEQDERRVMGIKVLIYLGALFGCSWYIKRFKWSVLKNRKVQF
PF02167	Ddis_Amoebozoa	SQKLLANGKLLSKLAIVSGVVGTATAITTSTTLLSDDFVQPTSYPWEHRFPWQSYDHAAIRRGHQVYTQVCSTCHSLNLISYRHLANVAYTPEELKAMAADTTVMDGPDSEGDMFERKGQVTDFHPKPYPNSNAARFANNGALPPDLSLVIKARGAHEDYVFSLLTGYCEPPAGVRVVGGQYFNPYFPGTKIAMAPPLADGMVEYDDGTDNSMSQMAKDVSTFLCWASEPEHDDRKKLGMKVLLGVSIIALPLFYWKRLKWSVIKTRKISFK
PF02167	Ppal_Amoebozoa	QPPEFPWNHRFPWQSFDHASIRRGHQVYTQVCSTCHSLDMISYRHLIDVAYTADEMKAYTAELTVMDGPDSEGDMFERKGAITDYHPKPYENQNAARFSNNGALPPDMSLVVKARGRHEDYVFSLLTTYVEPPSGVKITQGQYFNPYFPGTKIAMAPPLSEGQVEFDDGTEASVSQMAKDVSTFLAWASEPEHDDRKKLGIKIILGLSLIAVPI
PF02167	Ppol_Amoebozoa	LLALLAVGVAPSSTSQVAECSGHPLDPPHYPWDHAPIYASFDHASIRRGHKVYSQVCSTCHSLDRIAYRNLVDVCYTEKEAKAIAANVQIQDGPDMEGDMFERPGILSEYTPRPYPNSAAARFSNNGALPPDLSLIIKARGRREDYLFALLTGYTSPPHGVTVREGLHYNPYFAGGKIAMAPPLASGLVEYDDGTPATISQMAKDVATFLCWTAEPEHDDRKKIGLKVALTVLLTAIPTLIWKRHKWAVIKTRKLDFR
PF02167	Ttra_Apusozoa	KDALGLAGVVTAGVGFYYATESGAGAVYASDALHPPSYPWDHTGWTDTYDHASIRRGHQVFKEVCATCHSLDRLAYRNLVGVAYTEEEAKALAAEIEVEDGPNDEGEMFMRPGKLSDYFPRPYANEEIARKANNGALPPDLSLIVKARHDGANYVFALLTGYPEDPPAGVELRDGLHYNPYFPGGAIGMAKALEDGLVEFEDGTPGTASQAAKDVTMFLAWVAEPELEERRLAGLTALVFLGLVGAGTFYMKRLTWAVVKSAQV
PF02167	Cneo_FungiDik	SANSAGENGLHPAVWPFEHYGPLETFNHSAIRRGYQVYREVCAACHSLDRIAWRNLVGVSHTVDEVKAMAEEVEYEDGPNDEGEMFQRPGKLADYMPAPYPNEEAARAGNAGALPPDLSLIIKARHGGADYVYSLLTGYCDPPAGVKVAEGMNYNPYFPGGGIAMARVLFDGLVEYDDGTPATTSQMAKDVVTFLSWAAEPEHDQRKKMGMQALIVLSSMFAISVYIKRFKWAYLKNRKIVYEPPK
PF02167	Umay_FungiDik	ASANMADEGLHPPKYPWSHSGVFETFDHASIRRGYQVYREVCSSCHSLDRIAWRNLVGQSHTVDEAKAMAEEVEYEDGPDDEGAMFQRPGKLADYMPRPYANDEAARAANAGALPPDLSLMVKARHGGADYIFALLTGYTDPPAGVKVQDGLNYNSYFPGTQIAMARVLYDGLVDYEDGTPATTSQMAKDVVTFLHFCAEPEHDTRKKMGMQAVIILSSLTALSIWVKRFKWAGVKNRKLVYNPP
PF02167	Mcir_FungiZyg	EGLHPPSHPWPHSGPLDTFDHASIRRGYQVYREVCSACHSLDRIAWRNLIDVSHSEDEVKAMAEEFEYQDGPDDNGEMFMRPGKPADYMPKPYPNDEAARAGNAGALPPDLSLITKARHGGEDYVFALLTGYVDAPGGVEVREGLNYNPYFPGGAIAMAQTLFDGVVEYEDGTPATASQMAKDVCTFLAWAAEPEHDDRKKMGMKATIITAGLVALSVYLKKFKWAPLKTRKIVYNPPK
PF02167	Rory_FungiZyg	TVQARFASTKSAISSNPMQFGLVTAAIVGTTATAYMYADASANMADEGLHAPHYPWPHSGPLSTFDHAAIRRGYQVYREVCSACHSLDRIAWRNLVGVSHTEAEAKAMAEEFEYQDGPDDKGEMFARPGKLSDYMPQPYANEEAARAANAGALPPDLSLITKARHGGEDYVFSLLTGYVDAPGGIEVREGLNYNPYFPGGAIAMARVLFDGVVEYEDGTPATTSQMAKDVSTFLAWAAEPEHDDRKKMGMKAVIILTGLTAMSIWLKRFKWAPIKSRKIVYNPPK
PF02167	Rirr_FungiZyg	LHSPSYPWPHFGPFNTFDHASIRRGYQVYREVCSTCHSLEYISWRNLVGVSHTEDEVRAMAEEFEYKDGPDDNGDYFERPGKLSDRFPRPYPNEEASRAANGGALPXDLSLVVKAREGGANYIFSLLTGYYDPPAGVEIREGLNYNPYFPGGAISMARLLFDGLVEYDDGTPATTSQMAKDVTTFLSWAAEPEHDDRKKMGIKAIIMLSAMTILSIWLKRNRWVSLKSRKIAYAPPR
PF02167	Amac_FungiBla	LAAGAPLPLPVKPAFAVRPAQRADWCLEALESGRRAATTVATLGAAAALAYSVSLTSTSAVHADTEAEGLHAPHYPWNHKGPLDSFDHASIRRGYQVYKEVCAACHSLDRIAYRNLVGVSHSVDEAKALAEEMEYVDGPNDQGEMFTRPGKLSDYHPRPYPNEEAARAANAGAYPPDLSLMVKARHGAEDYVFALLMGYCDPPAGVEIREGLNYNPYFPGGAIGMARNIYDEVVEFEDGTPATASQIAKDVVTFLAWAAEPEHDDRKRMGLKAMILLTAMSGFSLWLKRFKWSVLKSRKPKFLYVPPQ
PF02167	Cang_FungiBla	QQKVLTTLATLSGAAALAYSVSLSTPSAVHADTEAEGLHPPHYPWNHKGPLDSFDHASIRRGYQVYKEVCAACHSLDRIAYRNLVGVSHSLDEAKALAEEMEFQDGPNDVGDMFMRPGKLSDYHPRPYPNEEAARAANAGAYPPDLSLMVKARHGGEDYIFSLLMGYCDPPAGIEIREGLNYNPYFPGGAIGMARNIYDEVVEYEDGTPATAAQIAKDVTTFLAWAAEPEHDDRKRMGLKAMILLTAASGFSLWLKRFKWSLLKSRKIVYNKP
PF02167	Ccor_FungiZyg	EFATATALTLVAGGTGLALYSTPTVNASAADDGLHPPAYPWVQNSWLSTFDHASIRRGYQVYKEVCAACHSMNRIAFRNLIGVSHTEDEAKALAEEFEFTDGPNDVGDMFERPGKLSDYFPNPYANEEQARAGNAGAYPPDLSLIVKARHGGPDYIFALLTGYVDPPGGVEVREGLNYNPYFPGGAIAMARVLYDGLVEYEDGTPATTSQMAKDVSNFLHWASEPEHDDRKRMGMKAVFILSLLTGMSLWLKRFKWSGLKTRKIVYNP
PF02167	Mver_FungiZyg	KNASLAAAGVATVGTLAYLSMESVDANMAADGLHAPAYPWDHKKNLATFDHAAIRRGYQVYKEVCAACHSLDRIAWRNLIGVSHTEAEVKAMAEEHEYTDGPNDVGDMFERPGKPSDYMPRPYANEEQARAGNMGAYPPDLSLMIKARHGGADYVFSLLTGYQDPPAGVEIREGLNFNPYFPGGAIGMARVLYDGIVEYEDGTPATTSQMAKDVTIFLSWAAEPEMDERKKMGMKALALLAVLTGLSVYLKRHKWAGIKTRKILYNPP
PF02167	Sdes_IchthyosporeaDermocystida	VDADSPQLHAQEYPWNHKGHFDTFDHASIRRGYQVYKEVCSACHGIDRISFRNLVGVSHTEDQAKAIAEEYQIRDGPNEQGQYFERPGKLSDRFPNPFPNEEAARFANNGAYPPDLSLMTKSRHGGESYVFALLTGYREPPAGVVIREGLNYNPYFPGGAIGMARVLYDGMLEYEDGTPATTSQLAKDVCTFLAWTAEPEHDDRKRMGVKAILILSACLMSAWYMKRFKWSPIKTRKIVYRP
PF02167	Nk52_Ichthyosporea	IDASGDELHAPVYPWNHSGYFQSYDHASIRRGFQVYKEVCAACHGIDRIAFRNLVGVSHTEAEAKAMAEEIEVKDGPNDDGEMFDRPGKLSDYFPNPFPNEEAARAGNQGAYPPDLSLVSKARHGGENYVFALLTGYRDPPAGVNIREGLNYNPYFPGGAIGMARVLYDGMVDYEDGTPATTSQMAKDVAVFLAWAAEPEHDERKLMGMKAMALLGMCAAVAWYMKRMKWSALKSRKIAYTP
PF02167	Clim_Corallochytrea	RFASTSSQGSSTGKKFGDAVIAGTTMASGLGITGYLAFNTVSASDDCLHPPEYPWDHNGPLSTLDHSSIRRGFQVYMEVCSACHSLTRIAYRNLVGVSHTVDEAKALAEEVEVQDGPDDEGNMFMRPGKLSDYLPAPYPNDEASRFANGGALPPDLSLIVKARHGREDYLFSLLTGYRDPPAGVNIREGLHYNPYFPGGAIAMARVLYDNLVEYEDGTPATTSQMAKDVITFLTWASEPEHDDRKRMGMKVLILLTVASGISMYWKRYRWSYLKSRKIVF
PF02167	Clii_Corallochytrea	GTTMASGLGITGYLAFNTVSASDDCLHPPEYPWDHNGPLSTLDHSSIRRGFQVYMEVCSACHSLTRIAYRNLVGVSHTVDEAKALAEEVEVQDGPDDEGNMFMRPGKLSDYLPAPYPNDEASRFANGGALPPDLSLIVKARHGREDYLFSLLTGYRDPPAGVNIREGLHYNPYFPGGAIAMARVLYDNLVEYEDGTPATTSQMAKDVITFLTWASEPEHDDRKRMGMKVLILLTVASGISMYWKRYRWSYLKSRKIVF
PF02167	Colp12	TTVSASGDGLHPTSYPWSHGGPLSGLDHSSVRRGHQVYKEVCSACHSLQRIAYRNLVGNVCTVEEAKAYAEDIEVEDGPDDTGAMFKRPGKLSDYFPSPYPNEEAARYANNGAYPPDLSLIIKARHGREDYVFSLLTGYDEPPAGISIREGLHFNRYFPGGAIGMARPLYDNMVEYEDGTPATTSQMAKDVVTFLTWAAEPEMDDRKLMGFRAVSLLLIGLVLTTYVKRHKWSVLKSRKIVF
PF02167	Apar_IchthyosporeaIchthyophonida	QGKMFASQALRSATQGLRSKAPLVAGTFAAIGAVGCGSVLASDDGLHPAQYPWSHNGLLXSLDHASMRRGFQVYKEVCAACHSLKRIAYRNLVNNTHTVXEAKALAEDTEVTDGPDDTGNMFTRPGKLSDYLPKPYPNDNAARFANGGALPPDLSLMVKGRHGREDYLFALLTGFHEPPAGVSIREGLHYNPYFPGGAIGMARPIYDGQVEYPDGTVATTSQMAKDVITFLTWCAEPELDERKLMGLKAMLLLGMSAGVALYYKRHKWTVMKSRKLAY
PF02167	Cfra_IchthyosporeaIchthyophonida	MFRAASFLRGRVPAIGITAASALVMGTGTVLASDDGLHPAQYPWSHNGYIESLDHASMRRGFQVYKEVCSACHSLRRICYRNLVSNTHTTEEAKELAEDIEVVDGPDDEGNMFTRPGKLADHLPSPYPNDEAARFANGGALPPDLSLIVKARHGREDYLFALLTGFHEPPAGVVIREGLNYNPYFPGSAIGMARPIYDGMVEYEDGTPATTSQMAKDVIVFLTWCAEPELDERKRMGMKCMAILGMSALVGWYMKRNKWSVIKSRKISYVK
PF02167	Sarc_IchthyosporeaIchthyophonida	TVLASDDGLHPAQYPWSHNGLLQSLDHASMRRGFQVYQEVCSACHSLRRICYRNLVGNTHTVNEAKELAEDIEVVDGPDDEGNMFTRPGKLADHMPSPYPNDEAARFANGGALPPDLSLIVKARHGREDYLFALLTGFHEPPAGVNIREGLHNPYFPGLAIGMARPIYDGMVEYEDGTPATTSQMAKDVITFLTWCAEPEHDERKRMGMKCMSILGMAALVAWYMKRNKWIVIKSRKISY
PF02167	Cowc_Filasterea	LFRGRAGLLTAAAGASTVAAAGFYTTVLASSDELHPAAYPWSHGGPLSSFDHASVRRGFEVYKQVCSACHSLDKIAFRNLVGVTHTLDEAKALAADVDVEDGPDDSGKMFKRPGKLSDYMPRPYPNDQAARFANGGALPPDLSLVIKARHGREDYLFALLTGYKEPPAGIVLREGLHYNPYFAGGAIGMAQALYDEMIEYEDGTPASQSQMAKDVATFLAWAAEPEMNERKRMGMKAITLLTLAAGATWYVKRQRWSVLKTRKHVY
[truncated: 2,944 more rows]
