# Supplementary material for: Dynamics of genomic innovation in the unicellular ancestry of animals
Source: eLife journal article supplement (doi:10.7554/elife.26036), 2017-07-20

### Figure 3-Supplement 1

### A. *Salpingoeca rosetta* TE profile

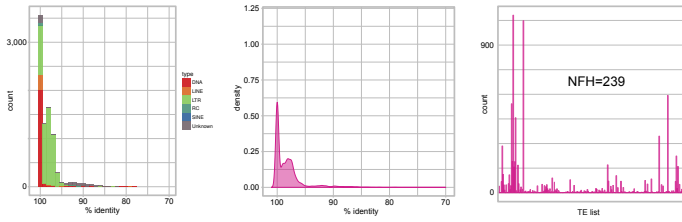

### B. *Monosiga brevicollis* TE profile

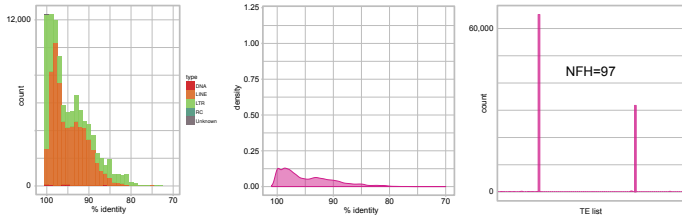

### C. *Capsaspora owczarzaki* TE profile

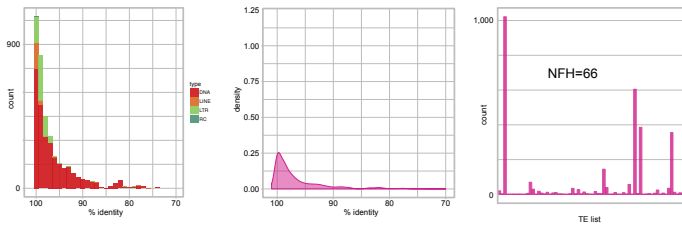

#### D. *Creolimax fragrantissima* TE profile

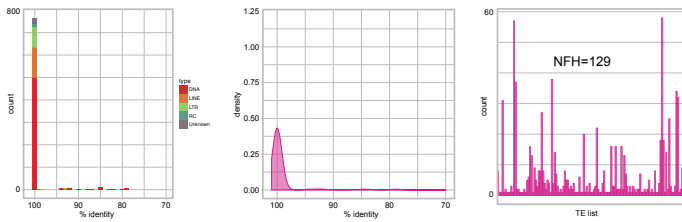

### E. *Sphaeroforma arctica* TE profile

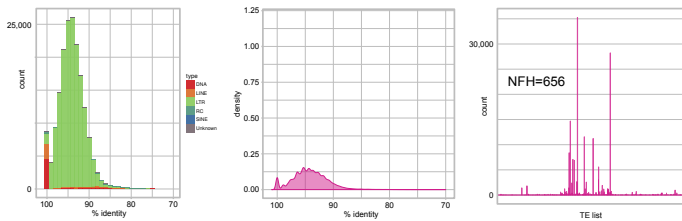

#### F. *Ichthyophonus hoferi* TE profile

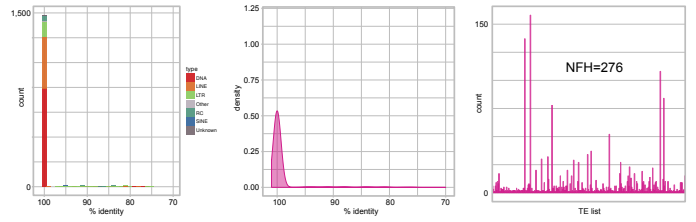

### G. *Abeoforma whisleri* TE profile

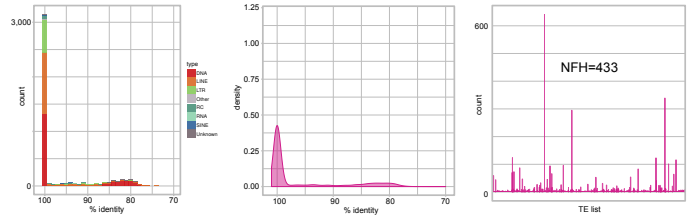

#### H. *Pirum gemmata* TE profile

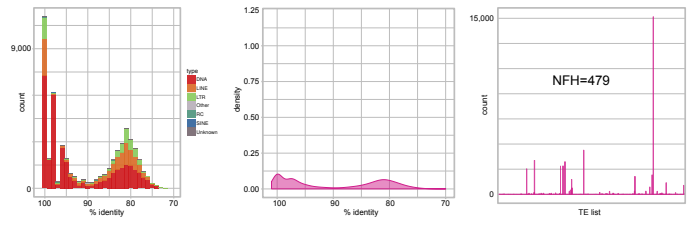

### I. *Chromosphaera perkinsii* TE profile

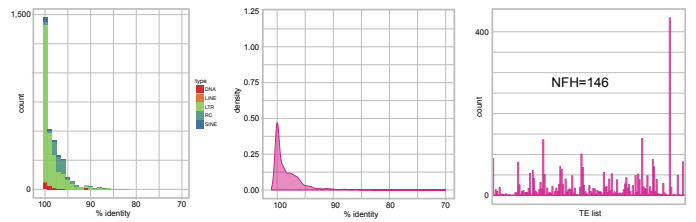

### J. *Corallochytrium limacisporum* TE profile

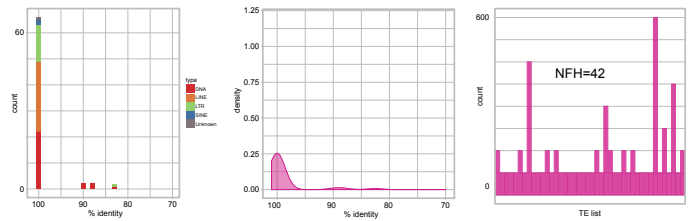

Supplement: supp [file elife-26036-supp-v1.zip › elife_poa_e26036_Figure_3_Figure_Supplement_1.pdf]
