# Supplementary material for: Dynamics of genomic innovation in the unicellular ancestry of animals
Source: eLife journal article supplement (doi:10.7554/elife.26036), 2017-07-20
Supplement: supp [file elife-26036-supp-v1.zip › elife_poa_e26036_Figure_3_Source_Data_2.odt]

## Sheet: Full1
	Salpingoeca rosetta					Monosiga brevicollis					Capsaspora owczarzaki
	sequences:	154				sequences:	218				sequences:	84
	total length:	55440309				total length:	41633360				total length:	27967784
	GC level:	56.01				GC level:	54.89				GC level:	53.82
	bases masked:	11694781 ( 22.62%)				bases masked:	2119731 ( 5.48%)				bases masked:	1678079 ( 6.12%)
		number of	length	percentage			number of	length	percentage			number of	length	percentage
		elements*	occupied	of sequence			elements*	occupied	of sequence			elements*	occupied	of sequence
	Retroelements	13649	1008107	1.95		Retroelements	1795	585903	1.52		Retroelements	2040	194804	0.71
	SINEs:	22	1355	0		SINEs:	33	2011	0.01		SINEs:	14	700	0
	Penelope	129	9525	0.02		Penelope	83	5597	0.01		Penelope	6	312	0
	LINEs:	4378	373764	0.72		LINEs:	780	377990	0.98		LINEs:	1302	123502	0.45
	CRE/SLACS	0	0	0		CRE/SLACS	386	343966	0.89		CRE/SLACS	1	81	0
	L2/CR1/Rex	662	38995	0.08		L2/CR1/Rex	15	779	0		L2/CR1/Rex	14	825	0
	R1/LOA/Jockey	2594	258307	0.5		R1/LOA/Jockey	138	15166	0.04		R1/LOA/Jockey	1031	102829	0.37
	R2/R4/NeSL	2	70	0		R2/R4/NeSL	2	75	0		R2/R4/NeSL	0	0	0
	RTE/Bov-B	49	3802	0.01		RTE/Bov-B	4	431	0		RTE/Bov-B	5	450	0
	L1/CIN4	282	18099	0.04		L1/CIN4	57	4290	0.01		L1/CIN4	58	4400	0.02
	LTR elements:	9249	632988	1.22		LTR elements:	982	205902	0.53		LTR elements:	724	70602	0.26
	BEL/Pao	108	5740	0.01		BEL/Pao	15	1515	0		BEL/Pao	17	984	0
	Ty1/Copia	690	81472	0.16		Ty1/Copia	176	29712	0.08		Ty1/Copia	191	11622	0.04
	Gypsy/DIRS1	2911	194473	0.38		Gypsy/DIRS1	530	157810	0.41		Gypsy/DIRS1	434	52001	0.19
	Retroviral	4495	284496	0.55		Retroviral	229	14225	0.04		Retroviral	35	2148	0.01
	DNA transposons	44677	3318163	6.42		DNA transposons	1963	223040	0.58		DNA transposons	958	209035	0.76
	hobo-Activator	8343	605518	1.17		hobo-Activator	491	34978	0.09		hobo-Activator	335	28126	0.1
	Tc1-IS630-Pogo	468	27717	0.05		Tc1-IS630-Pogo	65	49522	0.13		Tc1-IS630-Pogo	37	4831	0.02
	En-Spm	0	0	0		En-Spm	0	0	0		En-Spm	0	0	0
	MuDR-IS905	0	0	0		MuDR-IS905	0	0	0		MuDR-IS905	0	0	0
	PiggyBac	26	1428	0		PiggyBac	3	167	0		PiggyBac	1	65	0
	Tourist/Harbinger	343	23519	0.05		Tourist/Harbinger	67	15768	0.04		Tourist/Harbinger	20	1136	0
	Other (Mirage,	6	397	0		Other (Mirage,	0	0	0		Other (Mirage,	1	66	0
	P-element, Transib)					P-element, Transib)					P-element, Transib)
	Rolling-circles	0	0	0		Rolling-circles	0	0	0		Rolling-circles	0	0	0
	Unclassified:	4890	319682	0.62		Unclassified:	155	9169	0.02		Unclassified:	32	1586	0.01
	Total interspersed repeats:		4645952	8.99		Total interspersed repeats:		818112	2.12		Total interspersed repeats:		405425	1.48
	Small RNA:	139	52342	0.1		Small RNA:	112	9981	0.03		Small RNA:	31	18894	0.07
	Satellites:	956	65520	0.13		Satellites:	579	81366	0.21		Satellites:	47	2674	0.01
	Simple repeats:	120328	7132703	13.8		Simple repeats:	22699	1114454	2.88		Simple repeats:	26922	1072301	3.91
	Low complexity:	3326	183451	0.35		Low complexity:	2264	127734	0.33		Low complexity:	3533	185970	0.68
	Creolimax fragrantissima					Sphaeroforma arctica					Ichthyophonus hoferi
	sequences:	83				sequences:	9535				sequences:	1633
	total length:	44821703				total length:	120926867				total length:	88084217
	GC level:	40.51				GC level:	42.04				GC level:	33.38
	bases masked:	1692063 ( 3.80%)				bases masked:	7164390 ( 8.44%)				bases masked:	8705231 ( 10.49%)
		number of	length	percentage			number of	length	percentage			number of	length	percentage
		elements*	occupied	of sequence			elements*	occupied	of sequence			elements*	occupied	of sequence
	Retroelements	3513	256634	0.58		Retroelements	16089	1890449	2.23		Retroelements	12779	1156543	1.39
	SINEs:	41	1964	0		SINEs:	64	3505	0		SINEs:	34	1766	0
	Penelope	335	25964	0.06		Penelope	1911	160909	0.19		Penelope	2121	168932	0.2
	LINEs:	1825	150171	0.34		LINEs:	11495	1573821	1.85		LINEs:	8336	787431	0.95
	CRE/SLACS	0	0	0		CRE/SLACS	0	0	0		CRE/SLACS	0	0	0
	L2/CR1/Rex	1002	89270	0.2		L2/CR1/Rex	7962	1293127	1.52		L2/CR1/Rex	4352	473796	0.57
	R1/LOA/Jockey	154	11822	0.03		R1/LOA/Jockey	331	31087	0.04		R1/LOA/Jockey	167	14615	0.02
	R2/R4/NeSL	3	71	0		R2/R4/NeSL	23	2234	0		R2/R4/NeSL	461	50325	0.06
	RTE/Bov-B	13	2626	0.01		RTE/Bov-B	19	1493	0		RTE/Bov-B	52	5329	0.01
	L1/CIN4	262	16947	0.04		L1/CIN4	1144	78287	0.09		L1/CIN4	988	60129	0.07
	LTR elements:	1647	104499	0.23		LTR elements:	4530	313123	0.37		LTR elements:	4409	367346	0.44
	BEL/Pao	47	4147	0.01		BEL/Pao	65	4308	0.01		BEL/Pao	73	4493	0.01
	Ty1/Copia	58	3148	0.01		Ty1/Copia	252	25816	0.03		Ty1/Copia	524	57367	0.07
	Gypsy/DIRS1	651	38876	0.09		Gypsy/DIRS1	2211	149795	0.18		Gypsy/DIRS1	2283	206136	0.25
	Retroviral	663	44677	0.1		Retroviral	1504	102222	0.12		Retroviral	1059	62607	0.08
	DNA transposons	6600	480477	1.08		DNA transposons	31813	2504119	2.95		DNA transposons	14517	1113874	1.34
	hobo-Activator	1154	72698	0.16		hobo-Activator	5146	340991	0.4		hobo-Activator	2060	135162	0.16
	Tc1-IS630-Pogo	112	6922	0.02		Tc1-IS630-Pogo	1710	192368	0.23		Tc1-IS630-Pogo	559	46578	0.06
	En-Spm	0	0	0		En-Spm	0	0	0		En-Spm	0	0	0
	MuDR-IS905	0	0	0		MuDR-IS905	0	0	0		MuDR-IS905	0	0	0
	PiggyBac	13	418	0		PiggyBac	46	2433	0		PiggyBac	39	1761	0
	Tourist/Harbinger	108	7722	0.02		Tourist/Harbinger	482	31389	0.04		Tourist/Harbinger	297	16226	0.02
	Other (Mirage,	49	2575	0.01		Other (Mirage,	1326	100309	0.12		Other (Mirage,	505	30139	0.04
	P-element, Transib)					P-element, Transib)					P-element, Transib)
	Rolling-circles	0	0	0		Rolling-circles	0	0	0		Rolling-circles	0	0	0
	Unclassified:	554	37229	0.08		Unclassified:	2397	207336	0.24		Unclassified:	1013	86145	0.1
	Total interspersed repeats:		774340	1.74		Total interspersed repeats:		4601904	5.42		Total interspersed repeats:		2356562	2.84
	Small RNA:	232	28654	0.06		Small RNA:	158	13655	0.02		Small RNA:	378	35668	0.04
	Satellites:	223	15885	0.04		Satellites:	771	52896	0.06		Satellites:	732	105964	0.13
	Simple repeats:	16213	903171	2.03		Simple repeats:	53732	2840566	3.35		Simple repeats:	93200	5988368	7.22
	Low complexity:	784	42267	0.09		Low complexity:	2492	125799	0.15		Low complexity:	8110	454180	0.55
	Pirum gemmata					Abeoforma whisleri					Chromosphaera perkinsi
	sequences:	83529				sequences:	74687				sequences:	12060
	total length:	87047501				total length:	101910299				total length:	36906714
	GC level:	28.85				GC level:	30.27				GC level:	42.51
	bases masked:	28959467 ( 33.74%)				bases masked:	16719796 ( 17.36%)				bases masked:	1260519 ( 3.83%)
		number of	length	percentage			number of	length	percentage			number of	length	percentage
		elements*	occupied	of sequence			elements*	occupied	of sequence			elements*	occupied	of sequence
	Retroelements	41316	4828130	5.63		Retroelements	23000	2214143	2.3		Retroelements	1424	134216	0.41
	SINEs:	53	2883	0		SINEs:	238	13388	0.01		SINEs:	34	2231	0.01
	Penelope	5276	454901	0.53		Penelope	2188	191265	0.2		Penelope	6	336	0
	LINEs:	23838	2734019	3.19		LINEs:	12516	1227349	1.27		LINEs:	288	22070	0.07
	CRE/SLACS	5	335	0		CRE/SLACS	3	234	0		CRE/SLACS	1	80	0
	L2/CR1/Rex	3315	303331	0.35		L2/CR1/Rex	3901	397635	0.41		L2/CR1/Rex	44	3111	0.01
	R1/LOA/Jockey	1797	201170	0.23		R1/LOA/Jockey	813	86166	0.09		R1/LOA/Jockey	76	5902	0.02
	R2/R4/NeSL	8032	1059601	1.23		R2/R4/NeSL	3055	369416	0.38		R2/R4/NeSL	10	473	0
	RTE/Bov-B	150	8411	0.01		RTE/Bov-B	150	8747	0.01		RTE/Bov-B	6	364	0
	L1/CIN4	4085	621608	0.72		L1/CIN4	1456	110936	0.12		L1/CIN4	84	8124	0.02
	LTR elements:	17425	2091228	2.44		LTR elements:	10246	973406	1.01		LTR elements:	1102	109915	0.33
	BEL/Pao	182	15184	0.02		BEL/Pao	169	11659	0.01		BEL/Pao	22	2122	0.01
	Ty1/Copia	1286	102685	0.12		Ty1/Copia	877	59450	0.06		Ty1/Copia	79	6946	0.02
	Gypsy/DIRS1	12268	1482797	1.73		Gypsy/DIRS1	6339	667076	0.69		Gypsy/DIRS1	809	87232	0.26
	Retroviral	428	25041	0.03		Retroviral	1387	90963	0.09		Retroviral	71	3204	0.01
	DNA transposons	26690	2606876	3.04		DNA transposons	23965	1632276	1.7		DNA transposons	489	35671	0.11
	hobo-Activator	4716	339661	0.4		hobo-Activator	4606	298556	0.31		hobo-Activator	119	8310	0.03
	Tc1-IS630-Pogo	271	17367	0.02		Tc1-IS630-Pogo	626	36077	0.04		Tc1-IS630-Pogo	15	1247	0
	En-Spm	0	0	0		En-Spm	0	0	0		En-Spm	0	0	0
	MuDR-IS905	0	0	0		MuDR-IS905	0	0	0		MuDR-IS905	0	0	0
	PiggyBac	41	2644	0		PiggyBac	64	3388	0		PiggyBac	4	178	0
	Tourist/Harbinger	1275	125661	0.15		Tourist/Harbinger	776	47019	0.05		Tourist/Harbinger	22	1495	0
	Other (Mirage,	465	26828	0.03		Other (Mirage,	570	31442	0.03		Other (Mirage,	4	176	0
	P-element, Transib)					P-element, Transib)					P-element, Transib)
	Rolling-circles	0	0	0		Rolling-circles	0	0	0		Rolling-circles	0	0	0
	Unclassified:	1309	81873	0.1		Unclassified:	1400	89819	0.09		Unclassified:	58	5044	0.02
	Total interspersed repeats:		7516879	8.76		Total interspersed repeats:		3936238	4.09		Total interspersed repeats:		174931	0.53
	Small RNA:	247	22642	0.03		Small RNA:	822	79097	0.08		Small RNA:	366	31120	0.09
	Satellites:	3933	564166	0.66		Satellites:	1772	210097	0.22		Satellites:	155	17195	0.05
	Simple repeats:	280431	20883654	24.33		Simple repeats:	180276	10471971	10.88		Simple repeats:	15707	722738	2.19
	Low complexity:	18881	1314763	1.53		Low complexity:	29339	2363039	2.45		Low complexity:	5318	318507	0.97
	Corallochytrium limacisporum
	sequences:	287
	total length:	24115307
	GC level:	51.2
	bases masked:	425952 ( 1.81%)
		number of	length	percentage
		elements*	occupied	of sequence
	Retroelements	593	49187	0.21
	SINEs:	24	1471	0.01
	Penelope	13	626	0
	LINEs:	207	21693	0.09
	CRE/SLACS	0	0	0
	L2/CR1/Rex	12	695	0
	R1/LOA/Jockey	105	13893	0.06
	R2/R4/NeSL	1	48	0
	RTE/Bov-B	5	447	0
	L1/CIN4	37	2591	0.01
	LTR elements:	362	26023	0.11
	BEL/Pao	17	1132	0
	Ty1/Copia	71	5822	0.02
	Gypsy/DIRS1	156	12050	0.05
	Retroviral	98	5474	0.02
	DNA transposons	658	46388	0.2
	hobo-Activator	195	14269	0.06
	Tc1-IS630-Pogo	9	656	0
	En-Spm	0	0	0
	MuDR-IS905	0	0	0
	PiggyBac	0	0	0
	Tourist/Harbinger	27	1856	0.01
	Other (Mirage,	1	5	0
	P-element, Transib)
	Rolling-circles	0	0	0
	Unclassified:	60	4349	0.02
	Total interspersed repeats:		99924	0.42
	Small RNA:	53	8267	0.04
	Satellites:	56	6682	0.03
	Simple repeats:	6361	246610	1.05
	Low complexity:	1397	68772	0.29
