# Supplementary material for: Dynamics of genomic innovation in the unicellular ancestry of animals
Source: eLife journal article supplement (doi:10.7554/elife.26036), 2017-07-20
Supplement: supp [file elife-26036-supp-v1.zip › elife_poa_e26036_Figure_3_Source_Data_3.odt]

## Sheet: cumulative_TE_counts
Cfra		11958			Sarc		85556			Pgem		83489			Awhi		55501			Ihof		31500			Sros		70630			Mbre		5210			Cowc		3360			Nk52		2558			Clim		1470
	Total fam	972				Total fam	3064				Total fam	3601				Total fam	2950				Total fam	1728				Total fam	843				Total fam	548				Total fam	433				Total fam	988				Total fam	611
0.05%	P25	6			0.01%	P25	7			0.00%	P25	3			0.02%	P25	10			0.01%	P25	4			0.00%	P25	3			0.04%	P25	2			0.06%	P25	2			1.13%	P25	29			0.95%	P25	14
0.21%	P50	25			0.04%	P50	35			0.02%	P50	13			0.09%	P50	50			0.09%	P50	29			0.02%	P50	14			0.36%	P50	19			0.27%	P50	9			4.77%	P50	122			4.42%	P50	65
0.67%	P75	80			0.13%	P75	108			0.05%	P75	43			0.34%	P75	188			0.38%	P75	120			0.06%	P75	40			1.50%	P75	78			1.43%	P75	48			14.03%	P75	359			16.53%	P75	243
Motif:Novosib-6_CR	825	825	6.8991470146		Motif:Daphne-18_HM	6782	6782	7.9269718079		Motif:Gypsy-24_DEl-I	8793	8793	10.5319263616		Motif:Gypsy-24_DEl-I	2947	2947	5.3098142376		Motif:CR1-79_HM	2030	2030	6.4444444444		Motif:Novosib-6_CR	7080	7080	10.0240690925		Motif:IMPB_01	613	613	11.7658349328		Motif:RTAg4	358	358	10.6547619048		Motif:MINISAT2_CB	54	54	2.1110242377		Motif:DNA2-5_DR	60	60	4.0816326531
Motif:Daphne-18_HM	487	1312	10.9717344037		Motif:CR1-79_HM	5390	12172	14.2269390808		Motif:R5-1_SM	7591	16384	19.6241421026		Motif:R5-1_SM	2790	5737	10.3367506892		Motif:Daphne-18_HM	2022	4052	12.8634920635		Motif:Sola1-1_AC	4425	11505	16.2891122752		Motif:Cre-1_MB	504	1117	21.4395393474		Motif:Ag-Jock-1	250	608	18.0952380952		Motif:tRNA-3_DRe	38	92	3.5965598124		Motif:IMPB_01	46	106	7.2108843537
Motif:Sola1-1_AC	452	1764	14.7516307075		Motif:Novosib-6_CR	2319	14491	16.9374444808		Motif:Coprina_Cc1	3734	20118	24.0965875744		Motif:Penelope-13_HM	1506	7243	13.0502153114		Motif:Penelope-1_DR	1490	5542	17.5936507937		Motif:REP-4_PBa	3589	15094	21.3705224409		Motif:Mbcv_LTR	275	1392	26.7178502879		Motif:hAT-N4_ALy	246	854	25.4166666667		Motif:EnSpm-1_HV	38	130	5.082095387		Motif:RTAg4	38	144	9.7959183673
Motif:CR1-79_HM	416	2180	18.2304733233		Motif:Penelope-1_DR	1653	16144	18.8695123662		Motif:EnSpm1_SB	3520	23638	28.3127118543		Motif:EnSpm-34_SBi	1160	8403	15.1402677429		Motif:Polinton-1N1_DR	1476	7018	22.2793650794		Motif:hAT-N144_DR	3444	18538	26.2466374062		Motif:Ginger2-1_LS	169	1561	29.9616122841		Motif:TART_DV	186	1040	30.9523809524		Motif:tRNA-Gly-GGA	32	162	6.3330727131		Motif:hAT-N4_ALy	32	176	11.9727891156
Motif:Sola3-1_BF	354	2534	21.1908345877		Motif:MuDr-3_HM	1585	17729	20.7221001449		Motif:EnSpm-34_SBi	2990	26628	31.894021967		Motif:IMPB_01	1051	9454	17.0339273166		Motif:DNA9-3_DR	890	7908	25.1047619048		Motif:Sola3-1_BF	2487	21025	29.7678040493		Motif:DNA2-5_DR	109	1670	32.0537428023		Motif:Tx1-3_PM	156	1196	35.5952380952		Motif:tRNA-Asp-GAY	31	193	7.5449569977		Motif:Ginger1-1_AC	24	200	13.6054421769
Motif:hAT-N144_DR	298	2832	23.6828901154		Motif:DNA8-25_DR	1541	19270	22.5232596194		Motif:L1-1_STu	2369	28997	34.7315215178		Motif:CR1-42_HM	974	10428	18.7888506513		Motif:Gypsy68-I_AG	616	8524	27.0603174603		Motif:ERV1-N3-I_DR	2161	23186	32.8274104488		Motif:Gypsy-53_PM-LTR	92	1762	33.8195777351		Motif:Jockey-3_DGri	156	1352	40.2380952381		Motif:Gypsy-22-LTR_DR	30	223	8.7177482408		Motif:EnSpm-9_DR	23	223	15.1700680272
Motif:ERV1-N3-I_DR	289	3121	26.0996822211		Motif:hAT-N144_DR	1516	20786	24.2951984665		Motif:GLT2_SM	2260	31257	37.4384649475		Motif:CR1-79_HM	937	11365	20.4771085206		Motif:Gypsy-24_DEl-I	557	9081	28.8285714286		Motif:Mariner-62_HSal	2098	25284	35.7978196234		Motif:Nematis_Cr	83	1845	35.4126679463		Motif:CACTA-1_CapOwc	120	1472	43.8095238095		Motif:Baggins1_Cis	28	251	9.8123534011		Motif:DNA-N4_DR	22	245	16.6666666667
Motif:REP-4_PBa	287	3408	28.4997491219		Motif:EnSpm-7_HM	1290	22076	25.8029828416		Motif:LIN4b_SM	1987	33244	39.8184191929		Motif:Daphne-18_HM	847	12212	22.0032071494		Motif:hAT-N144_DR	551	9632	30.5777777778		Motif:Ginger1-1_AC	1943	27227	38.5487753079		Motif:Kolobok-3_Aplcal	81	1926	36.9673704415		Motif:Copia-7_ES-I	100	1572	46.7857142857		Motif:tRNA-Gly-GGY	27	278	10.8678655199		Motif:DNA8-5_DR	22	267	18.1632653061
Motif:ENSPM-6_DR	203	3611	30.1973574176		Motif:Sola1-1_AC	1140	23216	27.1354434522		Motif:EnSpm-5_HM	1848	35092	42.0318844399		Motif:Ginger1-1_AC	753	12965	23.3599394606		Motif:Neptune_Hyd	527	10159	32.2507936508		Motif:Kolobok-3_Aplcal	1392	28619	40.5196092312		Motif:DNA8-5_DR	79	2005	38.4836852207		Motif:RT1	68	1640	48.8095238095		Motif:tRNA-Val-GTY	25	303	11.8451915559		Motif:Ag-Jock-1	22	289	19.6598639456
Motif:Kolobok-3_Aplcal	202	3813	31.8866031109		Motif:Neptune_Hyd	1099	24315	28.4199822339		Motif:Penelope-13_HM	1835	36927	44.2297787733		Motif:LIN4b_SM	745	13710	24.702257617		Motif:ERV1-N6-I_DR	492	10651	33.8126984127		Motif:Mariner-N13_HSal	1347	29966	42.4267308509		Motif:Tx1-1_CGi	74	2079	39.9040307102		Motif:Gypsy-1_AC-I	65	1705	50.744047619		Motif:tRNA-Pro-CCY	23	326	12.744331509		Motif:Polinton-8_NVi	19	308	20.9523809524
Motif:Polinton-1_DR	188	4001	33.45877237		Motif:DNA9-3_DR	1082	25397	29.6846509888		Motif:BMSAT1	1644	38571	46.198900454		Motif:hAT-40_HM	733	14443	26.0229545414		Motif:EnSpm-N13_DR	489	11140	35.3650793651		Motif:Polinton-1_DR	1345	31311	44.3310208127		Motif:EnSpm-9_DR	68	2147	41.2092130518		Motif:Gypsy8-I_Dpse	58	1763	52.4702380952		Motif:hAT6-2N1_SP	23	349	13.6434714621		Motif:Sola3-1_BF	16	324	22.0408163265
Motif:Mariner-62_HSal	167	4168	34.8553269778		Motif:Sola3-1_BF	1035	26432	30.8943849642		Motif:L1-11_DR	1539	40110	48.0422570638		Motif:GLT2_SM	714	15157	27.3094178483		Motif:L1-53_DR	403	11543	36.6444444444		Motif:Mariner-N5_HSal	1333	32644	46.2183208268		Motif:hAT-N4_ALy	67	2214	42.4952015355		Motif:Jockey-6_DK	51	1814	53.9880952381		Motif:5S	23	372	14.5426114152		Motif:REP-4_PBa	16	340	23.1292517007
Motif:Penelope-1_DR	161	4329	36.2017059709		Motif:EnSpm-N13_DR	977	27409	32.036327084		Motif:CR1-42_HM	1395	41505	49.7131358622		Motif:DNA9-3_DR	678	15835	28.5310174591		Motif:R5-1_SM	357	11900	37.7777777778		Motif:ISL2EU-3N1_CFl	1273	33917	48.0206711029		Motif:Mbcv_I-int	63	2277	43.7044145873		Motif:MULE-1_CapOwc	46	1860	55.3571428571		Motif:TguLTRK9a	22	394	15.4026583268		Motif:TART_DV	14	354	24.0816326531
Motif:Homo6	159	4488	37.5313597592		Motif:REP-4_PBa	968	28377	33.1677497779		Motif:TART_DV	1337	42842	51.314544431		Motif:CR1-3_HM	571	16406	29.5598277509		Motif:MuDr-3_HM	332	12232	38.8317460317		Motif:ENSPM-6_DR	1266	35183	49.8131105762		Motif:hAT-N53_DR	61	2338	44.8752399232		Motif:Sola3-1_CapOwc	44	1904	56.6666666667		Motif:Gypsy104-I_Dr	22	416	16.2627052385		Motif:Tx1-3_PM	13	367	24.9659863946
Motif:Neptune_Hyd	157	4645	38.8442883425		Motif:Kolobok-N1_AEc	881	29258	34.1974846884		Motif:Ginger2-2_NV	1326	44168	52.9027776114		Motif:EnSpm-5_HM	547	16953	30.5453955785		Motif:DNA8-25_DR	293	12525	39.7619047619		Motif:Helitron-2_DR	1092	36275	51.3591958091		Motif:DNA-8-5_DR	59	2397	46.0076775432		Motif:Gypsy-50_GA-LTR	40	1944	57.8571428571		Motif:tRNAGlu_CB	21	437	17.0836591087		Motif:Jockey-3_DGri	13	380	25.8503401361
Motif:Gypsy-31-LTR_DR	155	4800	40.140491721		Motif:Mariner-29_HM	845	30103	35.1851418954		Motif:Ginger1-1_AC	1309	45477	54.470648828		Motif:Polinton1_SM	534	17487	31.5075404047		Motif:Kolobok-4_DR	266	12791	40.6063492063		Motif:DNA-8-5_DR	1053	37328	52.8500637123		Motif:Polinton-9_NVi	53	2450	47.0249520154		Motif:Polinton-2A_NV	38	1982	58.9880952381		Motif:MuDR-N1_ZM	17	454	17.7482408131		Motif:EnSpm-1_HV	13	393	26.7346938776
Motif:Ginger1-1_AC	153	4953	41.4199698946		Motif:Mariner-31_HM	808	30911	36.1295525738		Motif:Gypsy8-SM_I-int	1282	46759	56.0061804549		Motif:hAT-N144_DR	533	18020	32.4678834616		Motif:EnSpm-22_HMa	255	13046	41.4158730159		Motif:Gypsy-31-LTR_DR	998	38326	54.2630610222		Motif:REP-4_PBa	47	2497	47.9270633397		Motif:EnSpm1_SB	32	2014	59.9404761905		Motif:Gypsy-16_OD-I	17	471	18.4128225176		Motif:DNA2-10_CGi	13	406	27.619047619
Motif:hAT-2n1_DR	149	5102	42.6659976585		Motif:EnSpm-22_HMa	786	31697	37.0482491		Motif:SAT-1_PGr	1133	47892	57.3632454575		Motif:TART_DV	532	18552	33.4264247491		Motif:SAT2_CM	250	13296	42.2095238095		Motif:EnSpm-7_DR	941	39267	55.595356081		Motif:Mariner-1_MBr	46	2543	48.8099808061		Motif:CACTA_LP	30	2044	60.8333333333		Motif:Gypsy159-I_DR	17	488	19.077404222		Motif:Polinton-2A_NV	10	416	28.2993197279
Motif:Gypsy68-I_AG	134	5236	43.7865863857		Motif:hAT-2n1_DR	784	32481	37.9646079761		Motif:Polinton-1_SM	1062	48954	58.6352693169		Motif:Gypsy8-SM_I-int	521	19073	34.3651465739		Motif:Helitron-N12_CGi	237	13533	42.9619047619		Motif:EnSpm-N14_DR	932	40199	56.914908679		Motif:hAT-N144_DR	44	2587	49.6545105566		Motif:ATCopia24I	29	2073	61.6964285714		Motif:tRNA-1_DRe	15	503	19.6637998436		Motif:hAT-N53_DR	10	426	28.9795918367
Motif:Mariner-N13_HSal	128	5364	44.8569994982		Motif:EnSpm-4_HM	766	33247	38.8599280004		Motif:hAT-40_HM	1046	50000	59.8881289751		Motif:EnSpm1_SB	489	19562	35.24621178		Motif:EnSpm-7_HM	236	13769	43.7111111111		Motif:hAT-N4_ALy	915	41114	58.2103921846		Motif:TART_DV	42	2629	50.4606525912		Motif:Mariner-1_MLP	28	2101	62.5297619048		Motif:Polinton-2A_NV	15	518	20.2501954652		Motif:hAT-310_Ami	10	436	29.6598639456
Motif:ISL2EU-3N1_CFl	127	5491	45.9190500084		Motif:Kolobok-4_DR	734	33981	39.7178456216		Motif:Polinton1_SM	1038	51038	61.1314065326		Motif:Polinton-1_SM	464	20026	36.0822327526		Motif:Polinton-1_DR	235	14004	44.4571428571		Motif:EnSpm-9_DR	784	41898	59.3204020954		Motif:Novosib-6_CR	42	2671	51.2667946257		Motif:Sat-1_CPa	27	2128	63.3333333333		Motif:L1-44_XT	15	533	20.8365910868		Motif:Harbinger2-2_ES	10	446	30.3401360544
Motif:EnSpm1_HV	125	5616	46.9643753136		Motif:EnSpm-1_HM	722	34703	40.5617373416		Motif:Sat-1_CPa	1017	52055	62.349531076		Motif:Sat-1_CPa	402	20428	36.8065440262		Motif:DNA-2-12_DR	227	14231	45.1777777778		Motif:Homo6	766	42664	60.4049270848		Motif:Copia17-NVi_I-int	42	2713	52.0729366603		Motif:Gypsy61-I_AG	25	2153	64.0773809524		Motif:Gypsy-9_Trm-I	14	547	21.3838936669		Motif:DNA-8-5_DR	10	456	31.0204081633
Motif:Ginger1-5_HM	123	5739	47.9929754139		Motif:P-30_HM	693	35396	41.3717331339		Motif:CR1-3_HM	945	53000	63.4814167136		Motif:Novosib-6_CR	388	20816	37.5056305292		Motif:EnSpm-34_SBi	220	14451	45.8761904762		Motif:hAT-4_PBa	765	43429	61.4880362452		Motif:Sola1-1_MonBre	41	2754	52.8598848369		Motif:EnSpm-5_HM	22	2175	64.7321428571		Motif:Gypsy-52_BG-I	14	561	21.9311962471		Motif:Tx1-5_PM	9	465	31.6326530612
Motif:DNA-8-5_DR	120	5859	48.996487707		Motif:Gypsy68-I_AG	688	36084	42.1758848006		Motif:DIRS-4_DR	761	53761	64.3929140366		Motif:Penelope-1_DR	371	21187	38.1740869534		Motif:Kolobok-2_DR	207	14658	46.5333333333		Motif:Polinton-2A_NV	760	44189	62.5640662608		Motif:DNA-11_CGi	40	2794	53.6276391555		Motif:DNA2-5_DR	22	2197	65.3869047619		Motif:tRNA-Asn-AAC	13	574	22.4394057858		Motif:Tx1-1_CGi	9	474	32.2448979592
Motif:Kolobok-N1_AEc	110	5969	49.9163739756		Motif:IS3EU-4_DR	687	36771	42.9788676422		Motif:EnSpm-17_HM	721	54482	65.2565008564		Motif:Gypsy-600_AA-I	336	21523	38.7794814508		Motif:HELITRON7_OS	201	14859	47.1714285714		Motif:EnSpm1_HV	752	44941	63.6287696446		Motif:DNA3-4_CGi	37	2831	54.3378119002		Motif:Tx1-5_PM	19	2216	65.9523809524		Motif:IMPB_01	12	586	22.908522283		Motif:Sola1-1_AC	9	483	32.8571428571
Motif:EnSpm-2_TD	110	6079	50.8362602442		Motif:ENSPM-6_DR	676	37447	43.7689934078		Motif:Polinton3_SM	624	55106	66.003904706		Motif:Polinton3_SM	334	21857	39.3812724095		Motif:Kolobok-N1_AEc	195	15054	47.7904761905		Motif:DNA6-6_DR	730	45671	64.6623247912		Motif:Ginger1-1_AC	36	2867	55.0287907869		Motif:Polinton-2_PBa	19	2235	66.5178571429		Motif:hAT-N4_ALy	12	598	23.3776387803		Motif:RT1	9	492	33.4693877551
Motif:Helitron-2_DR	104	6183	51.7059708981		Motif:Polinton-1_DR	650	38097	44.5287297209		Motif:DNA-1-7_DR	607	55713	66.7309465918		Motif:Sola3-1_BF	313	22170	39.9452262121		Motif:ENSPM-6_DR	192	15246	48.4		Motif:RTAg4	703	46374	65.6576525556		Motif:Sola3-1_BF	35	2902	55.7005758157		Motif:Gypsy-91_SB-I	18	2253	67.0535714286		Motif:Gypsy89-I_DR	12	610	23.8467552776		Motif:RLTR31D_MM	9	501	34.0816326531
Motif:hAT-4_PBa	102	6285	52.5589563472		Motif:Helitron-3N3_PM	649	38746	45.2872972088		Motif:hAT-N4_ALy	556	56269	67.396902586		Motif:DNA8-25_DR	302	22472	40.4893605521		Motif:MuDR-1_NV	189	15435	49		Motif:TART_DV	684	47058	66.6260795696		Motif:DNA8-10_CGi	34	2936	56.3531669866		Motif:DIRS-4_DR	18	2271	67.5892857143		Motif:Gypsy-21_DEl-I	12	622	24.3158717748		Motif:LTR160B_MD	9	510	34.693877551
Motif:Dada-1_BF	102	6387	53.4119417963		Motif:Gypsy-31-LTR_DR	604	39350	45.9932675674		Motif:Polinton-2A_NV	533	56802	68.0353100408		Motif:L1-11_DR	301	22773	41.0316931226		Motif:Penelope-13_HM	179	15614	49.5682539683		Motif:Gypsy82-LTR_Dr	624	47682	67.5095568455		Motif:DNA-3_FV	34	2970	57.0057581574		Motif:R1_DYa	17	2288	68.0952380952		Motif:Copia-58_BG-I	12	634	24.7849882721		Motif:Gypsy98-LTR_Dr	9	519	35.306122449
Motif:Mariner-N5_HSal	101	6488	54.2565646429		Motif:Ginger1-10_HM	568	39918	46.6571602225		Motif:hAT-2_HM	503	57305	68.6377846183		Motif:ENSPM-6_DR	296	23069	41.5650168465		Motif:EnSpm-1_HM	178	15792	50.1333333333		Motif:IMPB_01	607	48289	68.368965029		Motif:L1-55_XT	33	3003	57.6391554702		Motif:hAT-2_HM	17	2305	68.6011904762		Motif:tRNA-Ser-TCY	11	645	25.2150117279		Motif:ERV1-1_SSc-I	9	528	35.9183673469
Motif:ERV1-N6-I_DR	101	6589	55.1011874895		Motif:hAT-N131_DR	554	40472	47.3046893263		Motif:DNA3-11_Mad	487	57792	69.2210949946		Motif:IS3EU-4_DR	274	23343	42.058701645		Motif:L1-48_DR	167	15959	50.6634920635		Motif:LTR24_Sar	534	48823	69.1250176979		Motif:Sola1-1_AC	32	3035	58.2533589251		Motif:Gypsy-9-I_CR	17	2322	69.1071428571		Motif:tRNA-Ala-GCY	11	656	25.6450351837		Motif:TE-X-4_NVi	8	536	36.462585034
Motif:DNA8-25_DR	94	6683	55.8872721191		Motif:ERV1-N3-I_DR	551	41023	47.9487119547		Motif:DNA-6-N2_DR	475	58267	69.7900322198		Motif:DIRS-4_DR	272	23615	42.5487829048		Motif:HMSBEAGLE_I-int	167	16126	51.1936507937		Motif:Dada-1_BF	492	49315	69.82160555		Motif:DNA4-24_CGi	32	3067	58.86756238		Motif:MinoAg1	16	2338	69.5833333333		Motif:Gypsy8-I_VC	11	667	26.0750586396		Motif:Polinton-9_NVi	8	544	37.0068027211
Motif:DNA9-3_DR	91	6774	56.6482689413		Motif:Chapaev-8_HM	540	41563	48.5798775071		Motif:ENSPM2_VV	449	58716	70.327827618		Motif:Dada-tL_DR	264	23879	43.0244500099		Motif:DNA4-4B_CGi	165	16291	51.7174603175		Motif:L1-3_CR	474	49789	70.4927084808		Motif:TE-X-4_NVi	30	3097	59.443378119		Motif:Jockey-2_DGri	15	2353	70.0297619048		Motif:Gypsy-12_DRh-I	11	678	26.5050820954		Motif:MdoLTR2-int	8	552	37.5510204082
Motif:DIRS-15B_DR	88	6862	57.3841779562		Motif:HELITRON7_OS	521	42084	49.1888353827		Motif:DNA-8-3_HM	429	59145	70.8416677646		Motif:DNA-1-7_DR	262	24141	43.4965135763		Motif:Ginger1-10_HM	163	16454	52.2349206349		Motif:Ag-Jock-1	453	50242	71.1340790033		Motif:MERMITE18D	30	3127	60.019193858		Motif:Gypsy-22_SB-I	15	2368	70.4761904762		Motif:Gypsy10-PTR_I-int	11	689	26.9351055512		Motif:Mariner-N5_HSal	8	560	38.0952380952
Motif:EnSpm-7_DR	80	6942	58.0531861515		Motif:DNA7-N1_DR	518	42602	49.7942867829		Motif:Merlin-1_Aplcal	426	59571	71.3519146235		Motif:Gypsy68-I_AG	255	24396	43.9559647574		Motif:Chapaev-8_HM	159	16613	52.7396825397		Motif:Gypsy-6_AEc-LTR	446	50688	71.7655387229		Motif:MdoLTR2-int	29	3156	60.575815739		Motif:DNA-8-3_HM	15	2383	70.9226190476		Motif:DNA-N4_DR	11	700	27.365129007		Motif:DNA9-3_DR	8	568	38.6394557823
Motif:EnSpm-N13_DR	77	7019	58.6971065396		Motif:TE-X-5_DR	494	43096	50.3716863809		Motif:hAT6-2_NV	395	59966	71.8250308424		Motif:Kolobok-3_Aplcal	252	24648	44.4100106304		Motif:Chapaev-1_AA	155	16768	53.2317460317		Motif:TSESSEBEII	436	51124	72.3828401529		Motif:Polinton-8_NVi	28	3184	61.113243762		Motif:Copia3-I_CR	14	2397	71.3392857143		Motif:tRNA-Met_	10	710	27.7560594214		Motif:Copia17-NVi_I-int	8	576	39.1836734694
Motif:EnSpm-N14_DR	74	7093	59.3159391203		Motif:Ginger1-5_HM	490	43586	50.9444106784		Motif:FUGUREP2	393	60359	72.2957515361		Motif:DNA7-N1_DR	248	24896	44.8568494261		Motif:ZFERV-2-I_DR	147	16915	53.6984126984		Motif:Ginger1-5_HM	426	51550	72.9859832932		Motif:TE-5_CGi	27	3211	61.6314779271		Motif:Gypsy-23_DEl-I	13	2410	71.7261904762		Motif:tRNALeuCTT_CB	10	720	28.1469898358		Motif:TE-5_CGi	7	583	39.6598639456
Motif:HAT-10_Mad	72	7165	59.9180464961		Motif:EnSpm1_HV	490	44076	51.5171349759		Motif:MuDR-11_GM	391	60750	72.7640767047		Motif:Sola1-1_AC	244	25140	45.2964811445		Motif:Gypsy-47_Mad-I	140	17055	54.1428571429		Motif:RLTR32_Rn	400	51950	73.5523148804		Motif:RTAg4	26	3237	62.1305182342		Motif:Copia-1-I_HS	11	2421	72.0535714286		Motif:tRNA-Leu-CTA	10	730	28.5379202502		Motif:Polinton-3_PBa	7	590	40.1360544218
Motif:EnSpm-4_HM	72	7237	60.5201538719		Motif:Helitron-2_DR	464	44540	52.0594698209		Motif:TRE3D	380	61130	73.2192264849		Motif:DNA-8-5_DR	233	25373	45.7162934001		Motif:EnSpm-4_HM	139	17194	54.5841269841		Motif:Mariner-15_SIn	383	52333	74.0945773751		Motif:Ag-Jock-1	26	3263	62.6295585413		Motif:Tx1-1_CGi	10	2431	72.3511904762		Motif:HELITRON7_CB	10	740	28.9288506646		Motif:Nematis_Cr	7	597	40.612244898
Motif:L1-53_DR	71	7308	61.1138986453		Motif:Merlin-1_DR	455	44995	52.5912852401		Motif:Gypsy1-SM_LTR	375	61505	73.6683874522		Motif:Ginger1-5_HM	231	25604	46.1325021171		Motif:LIN4b_SM	135	17329	55.0126984127		Motif:HAT-10_Mad	369	52702	74.6170182642		Motif:ERV1-1_SSc-I	25	3288	63.1094049904		Motif:Gypsy14-LTR_Dpse	10	2441	72.6488095238		Motif:Gypsy-41_AMi-I	10	750	29.319781079		Motif:DNA8-10_CGi	7	604	41.0884353741
Motif:Helitron-3N3_PM	67	7375	61.6741930089		Motif:P-27_HM	440	45435	53.1055682828		Motif:P-35_HM	374	61879	74.116350657		Motif:EnSpm-9_DR	218	25822	46.5252878327		Motif:EnSpm1_HV	133	17462	55.4349206349		Motif:hAT-2n1_DR	363	53065	75.1309641795		Motif:HARB-6_ALy	24	3312	63.5700575816		Motif:Gypsy-13_SMo-LTR	10	2451	72.9464285714		Motif:Gypsy-21_LBS-I	10	760	29.7107114934		Motif:Sola3-1_CapOwc	6	610	41.4965986395
Motif:Gypsy82-LTR_Dr	66	7441	62.22612477		Motif:HATN16_DR	435	45870	53.6140072		Motif:HAL1-2a_MD	281	62160	74.4529219418		Motif:Kolobok-N1_AEc	210	26032	46.9036593935		Motif:CR1-3_HM	132	17594	55.853968254		Motif:Jockey-3_DGri	344	53409	75.6180093445		Motif:DNA-N4_DR	23	3335	64.0115163148		Motif:DIRS-8_DR	10	2461	73.244047619		Motif:Gypsy-143_AA-I	10	770	30.1016419077		Motif:Mariner-62_HSal	6	616	41.9047619048
Motif:EnSpm-9_DR	64	7505	62.7613313263		Motif:DNA-2-24_DR	422	46292	54.1072513909		Motif:Proto1-2_NG	273	62433	74.779911126		Motif:Polinton-1_DR	206	26238	47.274823877		Motif:GLT2_SM	130	17724	56.2666666667		Motif:EnSpm-4_HM	321	53730	76.0724904432		Motif:LTR160B_MD	21	3356	64.4145873321		Motif:Copia-1_ES-I	10	2471	73.5416666667		Motif:tRNA-Ser-TCG	9	779	30.4534792807		Motif:LTR44B_MD	6	622	42.3129251701
Motif:Dada-tL_DR	63	7568	63.2881752801		Motif:Dada-tL_DR	422	46714	54.6004955818		Motif:HMSBEAGLE_I-int	271	62704	75.1045047851		Motif:Polinton-2A_NV	205	26443	47.6441865912		Motif:CR1-42_HM	124	17848	56.6603174603		Motif:ERV-2B_Crp-LTR	283	54013	76.4731700411		Motif:MERMITE18F	20	3376	64.7984644914		Motif:ROO_I-int	9	2480	73.8095238095		Motif:tRNA-Ile-ATT	9	788	30.8053166536		Motif:L1-55_XT	6	628	42.7210884354
Motif:TSESSEBEII	59	7627	63.7815688242		Motif:Homo6	418	47132	55.0890644724		Motif:hATm-27_HM	254	62958	75.4087364803		Motif:TRE3D	203	26646	48.0099457667		Motif:P-30_HM	123	17971	57.0507936508		Motif:DNA2-5_DR	277	54290	76.8653546652		Motif:Gypsy-19_SB-I	20	3396	65.1823416507		Motif:MuDR1_ZM	9	2489	74.0773809524		Motif:TART_DV	9	797	31.1571540266		Motif:Helitron-2_DR	6	634	43.1292517007
Motif:IS3EU-4_DR	56	7683	64.249874561		Motif:Gypsy-47_Mad-I	414	47546	55.5729580626		Motif:Gypsy-18_PBa-I	248	63206	75.7057816		Motif:Gypsy1-SM_LTR	197	26843	48.3648943262		Motif:Polinton1_SM	118	18089	57.4253968254		Motif:LTR-12D_Gav	263	54553	77.2377176837		Motif:Polinton-3_PBa	19	3415	65.547024952		Motif:L1-1_CR	9	2498	74.3452380952		Motif:Polinton-2_HM	9	806	31.5089913995		Motif:Gypsy8-I_Dpse	6	640	43.537414966
Motif:TRAS1	52	7735	64.6847298879		Motif:Transib-2_HM	413	47959	56.0556828276		Motif:ATCopia24I	241	63447	75.9944423816		Motif:hAT-2n1_DR	188	27031	48.7036269617		Motif:TE-2_XT	116	18205	57.7936507937		Motif:Gypsy120-LTR_DR	262	54815	77.6086648733		Motif:Mariner-79B_HSal	19	3434	65.9117082534		Motif:L1-11_DR	9	2507	74.6130952381		Motif:hAT-N1_SP	9	815	31.8608287725		Motif:ENSPM-6_DR	6	646	43.9455782313
Motif:HARB-4_Mad	52	7787	65.1195852149		Motif:DNA-2-12_DR	409	48368	56.5337322923		Motif:hATN-4_ACar	240	63687	76.2819054007		Motif:EnSpm-N13_DR	186	27217	49.0387560584		Motif:P-27_HM	115	18320	58.1587301587		Motif:EnSpm-N13_DR	258	55073	77.973948747		Motif:Lusen_I-int	19	3453	66.2763915547		Motif:Gypsy-41_GA-I	9	2516	74.880952381		Motif:Gypsy-7_RO-I	9	824	32.2126661454		Motif:DNA-11_CGi	6	652	44.3537414966
Motif:IS3EU-1_DR	51	7838	65.5460779395		Motif:Ginger1-6_HM	408	48776	57.0106129319		Motif:PIVE	234	63921	76.5621818443		Motif:EnSpm-22_HMa	185	27402	49.3720833859		Motif:Chapaev-3A_HM	114	18434	58.5206349206		Motif:Mariner-59N1_HSal	248	55321	78.325074331		Motif:hAT-N36_DR	19	3472	66.641074856		Motif:Polinton-9_NVi	8	2524	75.119047619		Motif:Gypsy-6_Trm-I	9	833	32.5645035184		Motif:Polinton-1_DR	5	657	44.693877551
Motif:L1-82_DR	50	7888	65.9642080615		Motif:Kolobok-3_Aplcal	406	49182	57.4851559213		Motif:hAT-N6_ACar	221	64142	76.8268873744		Motif:P-35_HM	182	27584	49.7000054053		Motif:TE-X-5_DR	113	18547	58.8793650794		Motif:hAT-N53_DR	248	55569	78.6761999151		Motif:ENSPM-6_ZM	19	3491	67.0057581574		Motif:IMPB_01	8	2532	75.3571428571		Motif:Gypsy-44_DEl-I	9	842	32.9163408913		Motif:Novosib-6_CR	5	662	45.0340136054
Motif:IMPB_01	50	7938	66.3823381836		Motif:IS3EU-1_DR	399	49581	57.951517135		Motif:Novosib-6_CR	200	64342	77.0664398903		Motif:Neptune_Hyd	179	27763	50.0225221167		Motif:Dada-tL_DR	113	18660	59.2380952381		Motif:EnSpm-2_TD	243	55812	79.0202463542		Motif:RLTR31D_MM	18	3509	67.3512476008		Motif:Helitron-9_CGi	8	2540	75.5952380952		Motif:tRNA-Val-GTA	8	850	33.2290852228		Motif:Neptune3_Ren	5	667	45.3741496599
Motif:Daphne-73_HMa	50	7988	66.8004683057		Motif:ZFERV-2-I_DR	389	49970	58.4061900977		Motif:Copia-58_BG-I	199	64541	77.3047946436		Motif:DNA-N4_DR	177	27940	50.3414352895		Motif:Kolobok-2_XT	112	18772	59.5936507937		Motif:hATa-1_EHux	237	56049	79.3557978196		Motif:Mariner-62_HSal	18	3527	67.6967370441		Motif:hAT-N144_DR	8	2548	75.8333333333		Motif:tRNA-Met-i	8	858	33.5418295543		Motif:MERMITE18D	5	672	45.7142857143
Motif:DNA-N4_DR	49	8037	67.2102358254		Motif:Mariner-30_HM	387	50357	58.8585254103		Motif:CR1-48_HM	195	64736	77.5383583466		Motif:L1-53_DR	173	28113	50.6531413848		Motif:Polinton-1_SM	111	18883	59.946031746		Motif:DIRS-15B_DR	233	56282	79.6856859691		Motif:Jockey-3_DGri	18	3545	68.0422264875		Motif:HAT1_DR	8	2556	76.0714285714		Motif:RT1	8	866	33.8545738858		Motif:MERMITE18B	5	677	46.0544217687
Motif:Gypsy-6_AEc-LTR	47	8084	67.6032781402		Motif:Ginger1-1_AC	371	50728	59.2921595212		Motif:Copia-1-I_HS	193	64929	77.7695265245		Motif:Dada-1_BF	169	28282	50.9576404029		Motif:hAT-40_HM	105	18988	60.2793650794		Motif:Mariner-79B_HSal	227	56509	80.0070791448		Motif:Gypsy-38_NVi-LTR	18	3563	68.3877159309		Motif:Gypsy-15_LBS-I	8	2564	76.3095238095		Motif:L1-25_ACar	8	874	34.1673182174		Motif:Mariner-79B_HSal	5	682	46.3945578231
Motif:HATN16_DR	46	8130	67.9879578525		Motif:L1-53_DR	355	51083	59.7070924307		Motif:MUDRAVI1	186	65115	77.9923103642		Motif:hAT-41_Lch	168	28450	51.2603376516		Motif:DNA7-N1_DR	100	19088	60.5968253968		Motif:ERV38_MD-int	224	56733	80.3242248336		Motif:MERMITE18C	17	3580	68.7140115163		Motif:Gypsy-10_PPa-I	8	2572	76.5476190476		Motif:Gypsy-95_GM-I	8	882	34.4800625489		Motif:LTR42_MD	5	687	46.7346938776
Motif:Gypsy-47_Mad-I	44	8174	68.3559123599		Motif:hAT-4_PBa	351	51434	60.1173500397		Motif:Gypsy-35_CQ-I	186	65301	78.215094204		Motif:EnSpm1_HV	168	28618	51.5630349003		Motif:Merlin-1_DR	99	19187	60.9111111111		Motif:TRAS1	212	56945	80.6243805748		Motif:Harbinger2-2_ES	17	3597	69.0403071017		Motif:LSU-rRNA_Mfr	7	2579	76.755952381		Motif:Gypsy-46_DWil-I	8	890	34.7928068804		Motif:Kolobok-3_Aplcal	5	692	47.074829932
Motif:Gypsy-22_DWil-I	40	8214	68.6904164576		Motif:Helitron-4_DR	350	51784	60.5264388237		Motif:CR1_Ele9	185	65486	78.4366802812		Motif:CR1-48_HM	166	28784	51.8621286103		Motif:Mariner-31_HM	99	19286	61.2253968254		Motif:hAT-1960_Ami	212	57157	80.924536316		Motif:Gypsy98-LTR_Dr	17	3614	69.3666026871		Motif:L1-4_VC	7	2586	76.9642857143		Motif:Gypsy-33_DWil-I	8	898	35.1055512119		Motif:hAT-N144_DR	5	697	47.4149659864
Motif:L1-3_CR	39	8253	69.0165579528		Motif:ERV1-N6-I_DR	350	52134	60.9355276076		Motif:Gypsy-18B_PBa-I	179	65665	78.651079783		Motif:REP-4_PBa	165	28949	52.159420551		Motif:CR1-80_HM	97	19383	61.5333333333		Motif:CASAT_HD	197	57354	81.2034546227		Motif:ENSPM-6_DR	17	3631	69.6928982726		Motif:hAT-N36B_DR	7	2593	77.1726190476		Motif:Gypsy-2_CP-I	8	906	35.4182955434		Motif:Gypsy82-LTR_Dr	5	702	47.7551020408
Motif:Mariner-39_HM	38	8291	69.3343368456		Motif:DIRS-15B_DR	345	52479	61.3387722661		Motif:DNA-8-27_DR	173	65838	78.8582927092		Motif:ENSPM2_VV	165	29114	52.4567124917		Motif:Mariner-29_HM	96	19479	61.8380952381		Motif:Rex1-31_DRe	196	57550	81.4809571004		Motif:Jockey-6_DK	16	3647	70		Motif:hAT6-2N1_SP	7	2600	77.380952381		Motif:Gypsy-23_MLP-I	8	914	35.7310398749		Motif:Gypsy61-I_AG	5	707	48.0952380952
Motif:Mariner-15_SIn	37	8328	69.643753136		Motif:hAT-N70_DR	342	52821	61.7385104493		Motif:MuDr-4_HM	164	66002	79.0547257723		Motif:HAL1-2a_MD	164	29278	52.752202663		Motif:EnSpm-17_HM	96	19575	62.1428571429		Motif:RT1	191	57741	81.7513804332		Motif:Helitron-2_DR	16	3663	70.3071017274		Motif:Gypsy-9_CCO-I	7	2607	77.5892857143		Motif:Gypsy-17_AMi-I	8	922	36.0437842064		Motif:DNA3-4_CGi	5	712	48.4353741497
Motif:hAT-N131_DR	35	8363	69.9364442214		Motif:P-29_HM	339	53160	62.1347421572		Motif:Gypsy-88_CQ-I	161	66163	79.2475655476		Motif:DNA-6-N2_DR	164	29442	53.0476928344		Motif:L1-82_DR	95	19670	62.4444444444		Motif:Mariner-N22_HSal	184	57925	82.0118929633		Motif:ERV1-N3-I_DR	16	3679	70.6142034549		Motif:Gypsy-80-I_ZM	7	2614	77.7976190476		Motif:Tx1-1_CGi	7	929	36.3174354965		Motif:TE-X-5_DR	4	716	48.7074829932
Motif:EnSpm1_SB	35	8398	70.2291353069		Motif:L2-8_NVi	315	53475	62.5029220627		Motif:hAT-4_PBa	158	66321	79.4368120351		Motif:ERV1-N3-I_DR	163	29605	53.3413812364		Motif:Helitron-N2_DR	94	19764	62.7428571429		Motif:RLTR20A4	181	58106	82.2681580065		Motif:DNA6-9_CGi	16	3695	70.9213051823		Motif:DIRS-1_CR	7	2621	78.005952381		Motif:RAM9B_I-int	7	936	36.5910867866		Motif:RLTR51A_Mm	4	720	48.9795918367
Motif:TE-X-5_DR	34	8432	70.5134637899		Motif:Transib-3_HM	313	53788	62.8687643181		Motif:DNA3-8_STu	152	66473	79.6188719472		Motif:hAT-N4_ALy	159	29764	53.627862561		Motif:hAT-N70_DR	94	19858	63.0412698413		Motif:Copia-7_ES-I	177	58283	82.5187597338		Motif:Tx1-3_PM	15	3710	71.2092130518		Motif:tRNA-1_DRe	6	2627	78.1845238095		Motif:HAT2_CI	7	943	36.8647380766		Motif:RLTR32_Rn	4	724	49.2517006803
Motif:LSU-rRNA_Mfr	34	8466	70.797792273		Motif:Chapaev-3A_HM	304	54092	63.2240871476		Motif:AC9_ZM	151	66624	79.7997340967		Motif:hATm-27_HM	159	29923	53.9143438857		Motif:Dada-U6_DR	92	19950	63.3333333333		Motif:Tx1-3_PM	174	58457	82.7651139742		Motif:tRNA-3_DRe	15	3725	71.4971209213		Motif:Sushi_I-int	6	2633	78.3630952381		Motif:Gypsy68-I_AG	7	950	37.1383893667		Motif:RLTR20C1_MM	4	728	49.5238095238
Motif:L1-48_DR	34	8500	71.082120756		Motif:ISL2EU-3N1_CFl	303	54395	63.578241152		Motif:Harbinger2N_TP	146	66770	79.9746074333		Motif:DNA8-5_DR	159	30082	54.2008252104		Motif:Mariner-30_HM	91	20041	63.6222222222		Motif:EnSpm-5_HM	172	58629	83.0086365567		Motif:EnSpm1_SB	15	3740	71.7850287908		Motif:Polinton-8_NVi	6	2639	78.5416666667		Motif:Gypsy-67_PAb-I	7	957	37.4120406568		Motif:Mariner-15_SIn	4	732	49.7959183673
Motif:Gypsy120-LTR_DR	34	8534	71.366449239		Motif:EnSpm-2_TD	300	54695	63.9288886811		Motif:Gypsy-35_CGi-I	134	66904	80.135107619		Motif:hAT-2_HM	158	30240	54.4855047657		Motif:Mariner-14_LCh	90	20131	63.9079365079		Motif:hAT-42_Lch	171	58800	83.2507433102		Motif:Copia-3_SCH-I	15	3755	72.0729366603		Motif:MuDr-1x_SP	6	2645	78.7202380952		Motif:Gypsy3-I_VC	7	964	37.6856919468		Motif:LTR24_Sar	4	736	50.0680272109
Motif:HeT-A3_DVi	33	8567	71.6424151196		Motif:Dada-U6_DR	288	54983	64.265510309		Motif:TE-X-4_DR	130	67034	80.2908167543		Motif:Tx1-1_CGi	155	30395	54.764779013		Motif:Transib-6_HM	88	20219	64.1873015873		Motif:Daphne-18_HM	166	58966	83.4857709189		Motif:Copia-1_SMo-I	15	3770	72.3608445298		Motif:LTR-2_Mad-I	6	2651	78.8988095238		Motif:Gypsy2-ZM_I-int	7	971	37.9593432369		Motif:Kolobok-N1_AEc	4	740	50.3401360544
Motif:hAT-N53_DR	33	8600	71.9183810002		Motif:Helitron-N1_PBa	282	55265	64.5951189864		Motif:Gypsy-8_DMoj-I	130	67164	80.4465258896		Motif:Nematis_Cr	155	30550	55.0440532603		Motif:Dada-U6_SS	88	20307	64.4666666667		Motif:Helitron-3N3_PM	163	59129	83.7165510406		Motif:LTR44B_MD	14	3784	72.6295585413		Motif:Kolobok-3_Aplcal	6	2657	79.0773809524		Motif:Gypsy-171-I_DR	7	978	38.232994527		Motif:Kolobok-10N1_CGi	4	744	50.612244898
Motif:CR1-80_HM	33	8633	72.1943468807		Motif:Gypsy-120_SB-I	282	55547	64.9247276638		Motif:RTAg4	128	67292	80.5998394998		Motif:Ginger1-N1_DR	152	30702	55.3179221996		Motif:IMPB_01	87	20394	64.7428571429		Motif:Mariner-16_SIn	162	59291	83.9459153334		Motif:RT1	13	3797	72.8790786948		Motif:hAT-4_PBa	6	2663	79.255952381		Motif:Gypsy-16_DRh-I	7	985	38.506645817		Motif:Jockey-6_DK	4	748	50.8843537415
Motif:DNA6-6_DR	32	8665	72.4619501589		Motif:hAT-51_HM	281	55828	65.253167516		Motif:hAT-N5_ACar	128	67420	80.75315311		Motif:DNA-TA-4_DR	151	30853	55.5899893696		Motif:EnSpm-2_TD	85	20479	65.0126984127		Motif:DIRS-8B_DR	161	59452	84.1738637973		Motif:DNA3-1_CGi	13	3810	73.1285988484		Motif:Gypsy68-I_AG	6	2669	79.4345238095		Motif:Gypsy-113_ZM-I	7	992	38.7802971071		Motif:hAT-N36_DR	4	752	51.156462585
Motif:Chapaev-1_AA	32	8697	72.729553437		Motif:DNA6-6_DR	275	56103	65.5745944177		Motif:EnSpm-22_SBi	126	67546	80.904071195		Motif:L2-8_NVi	150	31003	55.8602547702		Motif:Gypsy8-SM_I-int	81	20560	65.2698412698		Motif:LatiHarb1-2	160	59612	84.4003964321		Motif:DNA2-10_CGi	13	3823	73.3781190019		Motif:Gypsy-52_BG-I	6	2675	79.6130952381		Motif:Ginger1-1_AC	7	999	39.0539483972		Motif:hAT-2_DR	4	756	51.4285714286
Motif:Sat-1_CPa	31	8728	72.9887941127		Motif:EnSpm-N2_DR	273	56376	65.8936836692		Motif:Gypsy-34_NVi-I	125	67671	81.0537915174		Motif:EnSpm-3_TA	150	31153	56.1305201708		Motif:RLTR17B_Mm	79	20639	65.5206349206		Motif:RLTR20C1_MM	156	59768	84.6212657511		Motif:Polinton-2A_NV	12	3835	73.6084452975		Motif:Gypsy37-I_AG	6	2681	79.7916666667		Motif:DNA8-5_DR	7	1006	39.3275996873		Motif:HARB-6_ALy	4	760	51.7006802721
Motif:MuDr-3_HM	31	8759	73.2480347884		Motif:EnSpm-N14_DR	263	56639	66.2010846697		Motif:EnSpm-10_HM	120	67791	81.197523027		Motif:DNA2-5_DR	150	31303	56.4007855714		Motif:CR1-1_NV	79	20718	65.7714285714		Motif:ATCopia24I	153	59921	84.8378875832		Motif:LTR42_MD	12	3847	73.8387715931		Motif:Gypsy-12_CCO-I	6	2687	79.9702380952		Motif:CLOUD-7	7	1013	39.6012509773		Motif:HAL1-3A_ME	4	764	51.9727891156
Motif:DNA7-N1_DR	31	8790	73.5072754641		Motif:DNA8-26_DR	263	56902	66.5084856702		Motif:ENSPM-6_DR	115	67906	81.3352657236		Motif:L1_AC_7	149	31452	56.6692492027		Motif:DNA8-26_DR	77	20795	66.0158730159		Motif:HARB-4_Mad	152	60073	85.0530935863		Motif:hAT-N34_DR	12	3859	74.0690978887		Motif:DNA-8-5_DR	6	2693	80.1488095238		Motif:CER7-I_CE	7	1020	39.8749022674		Motif:Gypsy-9-I_CR	4	768	52.2448979592
Motif:L1-11_DR	30	8820	73.7581535374		Motif:Dada-U6_SS	257	57159	66.8088737201		Motif:hAT-N144_DR	114	68020	81.4718106577		Motif:DNA-8-3_HM	149	31601	56.937712834		Motif:CryptonV-2_DR	77	20872	66.2603174603		Motif:DNA9TA1_DR	152	60225	85.2682995894		Motif:DNA3-10_CGi	12	3871	74.2994241843		Motif:CEREBA_HV-int	6	2699	80.3273809524		Motif:tRNA-Pro-CCA	6	1026	40.109460516		Motif:Gypsy-50_GA-LTR	4	772	52.5170068027
Motif:DIRS-8B_DR	30	8850	74.0090316106		Motif:hAT-N21_DR	246	57405	67.096404694		Motif:Chaplin5a_FR	111	68131	81.604762304		Motif:P-30_HM	148	31749	57.204374696		Motif:Polinton3_SM	75	20947	66.4984126984		Motif:ERV1-1_SSc-I	147	60372	85.4764264477		Motif:Copia-7_CPu-I	12	3883	74.5297504798		Motif:Ves2_ML	5	2704	80.4761904762		Motif:tRNA-Phe-TTY	6	1032	40.3440187647		Motif:Gypsy37-I_AG	4	776	52.7891156463
Motif:L2-8_NVi	29	8879	74.2515470815		Motif:CryptonV-3_DR	246	57651	67.3839356679		Motif:CR1-79_HM	108	68239	81.7341206626		Motif:hAT-N70_DR	148	31897	57.4710365579		Motif:Penelope-12_HM	74	21021	66.7333333333		Motif:Mariner-13_SIn	145	60517	85.681721648		Motif:CACTA_LP	12	3895	74.7600767754		Motif:TE-X-4_NVi	5	2709	80.625		Motif:tRNAPheTTC_CB	6	1038	40.5785770133		Motif:Gypsy-22_SB-I	4	780	53.0612244898
Motif:ERV-2B_Crp-LTR	28	8907	74.4856999498		Motif:EnSpm-6N1_DR	245	57896	67.6702978166		Motif:hAT6-2_SP	106	68345	81.861083496		Motif:DNA-11_CGi	143	32040	57.7286895732		Motif:L2-8_NVi	72	21093	66.9619047619		Motif:hAT-310_Ami	142	60659	85.8827693615		Motif:Sola1-2_AC	11	3906	74.9712092131		Motif:Sola3-1_BF	5	2714	80.7738095238		Motif:TREP54	6	1044	40.8131352619		Motif:Gypsy118-LTR_DR	4	784	53.3333333333
Motif:RLTR32_Rn	26	8933	74.7031276133		Motif:Helitron-1_HM	243	58139	67.9543223152		Motif:Ag-Jock-1	104	68449	81.9856508043		Motif:IS3EU-1_DR	142	32182	57.9845408191		Motif:Gypsy-8_HMM-LTR	72	21165	67.1904761905		Motif:Mariner-18_HSal	135	60794	86.0739062721		Motif:Mariner-2_MBr	11	3917	75.1823416507		Motif:Mariner-2_SLL	5	2719	80.9226190476		Motif:RTAg4	6	1050	41.0476935106		Motif:Eri-2B2_EE	4	788	53.6054421769
Motif:Merlin-1_DR	26	8959	74.9205552768		Motif:EnSpm-7_DR	242	58381	68.2371779887		Motif:Gypsy-600_AA-I	103	68552	82.10902035		Motif:EnSpm-17_HM	141	32323	58.2385902957		Motif:Ginger1-1_AC	72	21237	67.419047619		Motif:HATN11B_DR	134	60928	86.2636273538		Motif:hAT-N36C_DR	11	3928	75.3934740883		Motif:LTR4_Str	5	2724	81.0714285714		Motif:L1-11_DR	6	1056	41.2822517592		Motif:EnSpm-N14_DR	4	792	53.8775510204
Motif:Mariner-79B_HSal	26	8985	75.1379829403		Motif:Mariner-N13_HSal	239	58620	68.5165271869		Motif:DNA-TA-4_DR	101	68653	82.2299943705		Motif:Gypsy1-I_Dmoj	140	32463	58.4908380029		Motif:tRNA-Met-i	71	21308	67.6444444444		Motif:CACTA_LP	128	61056	86.4448534617		Motif:Gypsy-31-LTR_DR	11	3939	75.6046065259		Motif:L1_Ele5	5	2729	81.2202380952		Motif:Helitron-N3_CGi	6	1062	41.5168100078		Motif:EnSpm-N13_DR	4	796	54.1496598639
Motif:SAT-23_DR	25	9010	75.3470480013		Motif:Chapaev-3_HM	238	58858	68.79470756		Motif:Polinton-2_HM	100	68753	82.3497706285		Motif:ERV1-N6-I_DR	138	32601	58.7394821715		Motif:Helitron-1_HM	71	21379	67.8698412698		Motif:Sola1-2_AC	127	61183	86.6246637406		Motif:DNA6-6_DR	11	3950	75.8157389635		Motif:L1-8_CR	5	2734	81.369047619		Motif:Gypsy-7_ADe-I	6	1068	41.7513682565		Motif:DNA3-13B_CGi	4	800	54.4217687075
Motif:LTR-12D_Gav	25	9035	75.5561130624		Motif:HAT-10_Mad	236	59094	69.0705502829		Motif:Jockey-3_DGri	99	68852	82.4683491238		Motif:Copia-1-I_HS	137	32738	58.9863245707		Motif:Ginger1-N1_DR	71	21450	68.0952380952		Motif:Mariner-N10_SIn	127	61310	86.8044740195		Motif:Mariner-17_AEc	10	3960	76.0076775432		Motif:hAT6-2_SP	5	2739	81.5178571429		Motif:Gypsy-3_MLP-I	6	1074	41.9859265051		Motif:Copia-7_ES-I	4	804	54.693877551
Motif:Kolobok-2_AP	25	9060	75.7651781234		Motif:Gypsy-8_DSe-I	229	59323	69.3382112301		Motif:DIRS-8_DR	98	68950	82.5857298566		Motif:Proto1-2_NG	136	32874	59.2313652006		Motif:Transib-2_HM	69	21519	68.3142857143		Motif:Mariner-14_SIn	126	61436	86.9828684695		Motif:L1-11_GM	10	3970	76.1996161228		Motif:Harbinger2-1_NV	5	2744	81.6666666667		Motif:Gypsy-3_DEl-I	6	1080	42.2204847537		Motif:TUBE2	3	807	54.8979591837
Motif:EnSpm-3_TA	24	9084	75.965880582		Motif:CryptonV-2_DR	229	59552	69.6058721773		Motif:SAT2_CM	97	69047	82.7019128268		Motif:Copia17-NVi_I-int	133	33007	59.4710005225		Motif:hAT-N107_DR	68	21587	68.5301587302		Motif:LOOPERN2_DR	126	61562	87.1612629194		Motif:Helitron-N35_CGi	10	3980	76.3915547025		Motif:HARB-6_ALy	5	2749	81.8154761905		Motif:Gypsy-12_CCO-I	6	1086	42.4550430023		Motif:tRNAGlyGGC_CB	3	810	55.1020408163
Motif:CASAT_HD	24	9108	76.1665830406		Motif:Kolobok-2_XT	227	59779	69.8711954743		Motif:L1-4_VC	97	69144	82.8180957971		Motif:SAT-23_DR	132	33139	59.7088340751		Motif:IS3EU-4_DR	67	21654	68.7428571429		Motif:RNLTR2d	115	61677	87.3240832507		Motif:Helitron-N34_CGi	10	3990	76.5834932821		Motif:HAL1-2a_MD	5	2754	81.9642857143		Motif:Gypsy-10_DTa-I	6	1092	42.689601251		Motif:tRNA-Asp-GAY	3	813	55.306122449
Motif:RLTR20A4	23	9131	76.3589228968		Motif:L1-48_DR	224	60003	70.133012296		Motif:DNA9-4_FV	94	69238	82.9306854795		Motif:Helitron-4_DR	131	33270	59.9448658583		Motif:Helitron-4_DR	67	21721	68.9555555556		Motif:Mariner-17_AEc	114	61791	87.4854877531		Motif:HATN11_DR	10	4000	76.7754318618		Motif:Gypsy-83_MLP-I	5	2759	82.1130952381		Motif:DNA9-3_DR	6	1098	42.9241594996		Motif:tRNA-1_DRe	3	816	55.5102040816
Motif:Poseidon-2B_PM	23	9154	76.551262753		Motif:Copia2-LTR_VC	223	60226	70.3936602927		Motif:SR2A	92	69330	83.0408796368		Motif:MuDr-3_HM	130	33400	60.1790958721		Motif:EnSpm-6N1_DR	66	21787	69.1650793651		Motif:Daphne-73_HMa	114	61905	87.6468922554		Motif:Gypsy-1_AC-I	10	4010	76.9673704415		Motif:Gypsy-62_BG-LTR	5	2764	82.2619047619		Motif:DNA3-14_CGi	6	1104	43.1587177482		Motif:Polinton-2_PBa	3	819	55.7142857143
Motif:LSU-rRNA_Hca	23	9177	76.7436026091		Motif:EnSpm-2_HM	221	60447	70.6519706391		Motif:LTR4_Str	87	69417	83.1450849813		Motif:Helitron-2_DR	128	33528	60.4097223473		Motif:hAT-2N1_TC	65	21852	69.3714285714		Motif:Kolobok-N1_AEc	113	62018	87.8068809288		Motif:EnSpm-7_DR	10	4020	77.1593090211		Motif:Gypsy-29_DWil-I	5	2769	82.4107142857		Motif:DNA-11_CGi	6	1110	43.3932759969		Motif:Polinton-1_SP	3	822	55.9183673469
Motif:TART_DV	22	9199	76.9275798629		Motif:Mariner-62_HSal	213	60660	70.9009303848		Motif:Copia-13_FV-I	86	69503	83.2480925631		Motif:CryptonV-2_DR	127	33655	60.6385470532		Motif:Gypsy-22_DWil-I	65	21917	69.5777777778		Motif:Gypsy-50_GA-LTR	105	62123	87.9555429704		Motif:DNA-1_FV	10	4030	77.3512476008		Motif:Gypsy-13_TA-I	5	2774	82.5595238095		Motif:CLOUD-4	6	1116	43.6278342455		Motif:MERMITE18C	3	825	56.1224489796
Motif:LTR24_Sar	22	9221	77.1115571166		Motif:hAT-47_HM	213	60873	71.1498901304		Motif:Ambal-3N1_FCy	86	69589	83.3511001449		Motif:Polinton-9_NVi	126	33781	60.8655699897		Motif:EnSpm-30_SBi	65	21982	69.7841269841		Motif:hAT-50_HM	104	62227	88.1027891831		Motif:Copia7-PTR_I-int	10	4040	77.5431861804		Motif:EnSpm-9_DR	5	2779	82.7083333333		Motif:CACTA_LP	6	1122	43.8623924941		Motif:Mariner-N22_HSal	3	828	56.3265306122
Motif:hAT-42_Lch	22	9243	77.2955343703		Motif:Gypsy-1_DWil-I	209	61082	71.3941745757		Motif:Sola1-1_AC	84	69673	83.4517122016		Motif:hAT-4_PBa	126	33907	61.0925929263		Motif:SAT-23_DR	64	22046	69.9873015873		Motif:Gypsy61-I_AG	103	62330	88.2486195668		Motif:Copia-7_ES-I	10	4050	77.7351247601		Motif:EnSpm-17_HM	5	2784	82.8571428571		Motif:ALRY-MAJOR_PT	6	1128	44.0969507428		Motif:Mariner-18_HSal	3	831	56.5306122449
Motif:hAT-2_DR	22	9265	77.479511624		Motif:L1-1_STu	208	61290	71.6372901959		Motif:Polinton-1_DR	84	69757	83.5523242583		Motif:Merlin-1_DR	125	34032	61.3178140934		Motif:Chapaev-3_HM	64	22110	70.1904761905		Motif:DIRS-4_DR	103	62433	88.3944499504		Motif:Copia-5_ES-I	10	4060	77.9270633397		Motif:DNA-3_FV	5	2789	83.005952381		Motif:Tx1-4_SK	5	1133	44.29241595		Motif:LSU-rRNA_Mfr	3	834	56.7346938776
Motif:Crack-2_SP	21	9286	77.6551262753		Motif:MuDR-1_NV	205	61495	71.8768993408		Motif:L1-58_ACar	84	69841	83.652936315		Motif:LSU-rRNA_Mfr	124	34156	61.5412334913		Motif:EnSpm8_SB	63	22173	70.3904761905		Motif:MINIME_DN	102	62535	88.5388645052		Motif:Copia-119_SB-I	10	4070	78.1190019194		Motif:DNA2-10_CGi	5	2794	83.1547619048		Motif:tRNASAT-1_ZM	5	1138	44.4878811572		Motif:L2_Plat1i	3	837	56.9387755102
Motif:Mariner-18_HSal	20	9306	77.8223783241		Motif:L1-56_DR	198	61693	72.10832671		Motif:Ginger1-5_HM	84	69925	83.7535483716		Motif:DNA-2-12_DR	123	34279	61.7628511198		Motif:DNA6-6_DR	63	22236	70.5904761905		Motif:hAT-2_HM	101	62636	88.6818632309		Motif:Ves2_ML	9	4079	78.2917466411		Motif:DNA-11_CGi	5	2799	83.3035714286		Motif:tRNA-Arg-AGA	5	1143	44.6833463643		Motif:ISL2EU-3N1_CFl	3	840	57.1428571429
Motif:Helitron-N1_PBa	20	9326	77.989630373		Motif:Harbinger-2_DR	198	61891	72.3397540792		Motif:Sat-2_STu	82	70007	83.8517649032		Motif:Transib-6_HM	120	34399	61.9790634403		Motif:EnSpm-21_HMa	62	22298	70.7873015873		Motif:Gypsy8-I_Dpse	101	62737	88.8248619567		Motif:LTR24_Sar	9	4088	78.4644913628		Motif:Dada-1_BF	5	2804	83.4523809524		Motif:TIRANT_I-int	5	1148	44.8788115715		Motif:Helitron-N34_CGi	3	843	57.3469387755
Motif:hATa-1_EHux	20	9346	78.1568824218		Motif:Chapaev-1_AA	194	62085	72.566506148		Motif:Gypsy3-LTR_AP	82	70089	83.9499814347		Motif:Gypsy-47_Mad-I	120	34519	62.1952757608		Motif:EnSpm1_SB	61	22359	70.980952381		Motif:Jockey-6_DK	100	62837	88.9664448535		Motif:ISL2EU-3N1_CFl	9	4097	78.6372360845		Motif:Copia17-NVi_I-int	5	2809	83.6011904762		Motif:SAT-1_SK	5	1153	45.0742767787		Motif:hAT-N36B_DR	3	846	57.5510204082
Motif:CryptonV-2_DR	20	9366	78.3241344706		Motif:EnSpm-30_SBi	187	62272	72.7850764412		Motif:DNA6-6_DR	82	70171	84.0481979662		Motif:Gypsy6-I_Dmoj	119	34638	62.409686312		Motif:Ginger1-6_HM	60	22419	71.1714285714		Motif:Gypsy118-LTR_DR	98	62935	89.1051960923		Motif:hAT-21_CPB	9	4106	78.8099808061		Motif:CACTA-1_Ccinerea	5	2814	83.75		Motif:Sat-1_CPa	5	1158	45.2697419859		Motif:hAT-4_PBa	3	849	57.7551020408
Motif:P-30_HM	19	9385	78.483023917		Motif:hAT-2_DR	184	62456	73.000140259		Motif:DNA3-1_STu	81	70252	84.1452167351		Motif:EnSpm-30_SBi	118	34756	62.6222950938		Motif:DNA-TA-4_DR	59	22478	71.3587301587		Motif:Polinton-1_SP	97	63032	89.2425315022		Motif:Gypsy8-I_Dpse	9	4115	78.9827255278		Motif:tRNA-Leu-CTY	4	2818	83.869047619		Motif:RETROSAT5_I-int	5	1163	45.4652071931		Motif:HAT-4N3_Mad	3	852	57.9591836735
Motif:MuDR-4_GM	19	9404	78.6419133634		Motif:L1-82_DR	183	62639	73.2140352518		Motif:Helitron-9_CGi	77	70329	84.2374444538		Motif:TE-X-5_DR	115	34871	62.8294985676		Motif:hAT-2n1_DR	58	22536	71.5428571429		Motif:Mariner-N39_HSal	96	63128	89.3784510831		Motif:Ginger1-2_DR	9	4124	79.1554702495		Motif:tRNA-Ile-ATT	4	2822	83.9880952381		Motif:MARY1_TM	5	1168	45.6606724003		Motif:HAT-4N1_Mad	3	855	58.1632653061
Motif:Mariner-59N1_HSal	19	9423	78.8008028098		Motif:EnSpm-21_HMa	182	62821	73.4267614194		Motif:Daphne-18_HM	77	70406	84.3296721724		Motif:Gypsy-18_PBa-I	114	34985	63.0349002721		Motif:Ginger1-5_HM	57	22593	71.7238095238		Motif:LSU-rRNA_Mfr	92	63220	89.5087073482		Motif:EnSpm1_HV	9	4133	79.3282149712		Motif:RT2	4	2826	84.1071428571		Motif:Kiri-3_CQ	5	1173	45.8561376075		Motif:Gypsy-62_BG-LTR	3	858	58.3673469388
Motif:Dada-U6_SS	19	9442	78.9596922562		Motif:EnSpm-14_HM	179	63000	73.6359811118		Motif:Gypsy-2_PGr-I	75	70481	84.4195043658		Motif:HATN16_DR	111	35096	63.2348966685		Motif:TART_DV	56	22649	71.9015873016		Motif:ISL2EU-1_LHu	89	63309	89.6347161263		Motif:DNA-TA-4_DR	9	4142	79.5009596929		Motif:REP-4_PBa	4	2830	84.2261904762		Motif:HAL1-1H_Cpo	5	1178	46.0516028147		Motif:Gypsy-35_CGi-I	3	861	58.5714285714
Motif:Copia2-LTR_VC	19	9461	79.1185817026		Motif:EnSpm-3_TA	178	63178	73.8440319791		Motif:Zator-1_HRo	74	70555	84.5081387967		Motif:DNA8-10_CGi	108	35204	63.429487757		Motif:Gypsy-18B_PBa-I	56	22705	72.0793650794		Motif:IS3EU-1_DR	89	63398	89.7607249044		Motif:DNA5-4_CGi	9	4151	79.6737044146		Motif:R7Ag2	4	2834	84.3452380952		Motif:Gypsy-8_DMoj-I	5	1183	46.2470680219		Motif:Gypsy-23_DEl-I	3	864	58.7755102041
Motif:Mariner-N22_HSal	18	9479	79.2691085466		Motif:EnSpm-15_HM	178	63356	74.0520828463		Motif:HAT-N6_Mad	71	70626	84.5931799399		Motif:Gypsy-31-LTR_DR	107	35311	63.6222770761		Motif:DNA-1-7_DR	56	22761	72.2571428571		Motif:Academ-4_SP	86	63484	89.8824861957		Motif:DNA4-6_CGi	9	4160	79.8464491363		Motif:Mariner-62_HSal	4	2838	84.4642857143		Motif:Gypsy-6_LH-I	5	1188	46.4425332291		Motif:ERV38_MD-int	3	867	58.9795918367
Motif:LatiHarb1-2	18	9497	79.4196353905		Motif:SAT-23_DR	169	63525	74.2496142877		Motif:ROO_I-int	69	70695	84.6758255579		Motif:CR1_Ele9	107	35418	63.8150663952		Motif:TRE3D	55	22816	72.4317460317		Motif:Gypsy-21_PBa-LTR	85	63569	90.0028316579		Motif:Copia-47_Mad-LTR	9	4169	80.019193858		Motif:Kolobok-7_CGi	4	2842	84.5833333333		Motif:Gypsy-5_PX-I	5	1193	46.6379984363		Motif:EnSpm-7_DR	3	870	59.1836734694
Motif:Zisupton-1_DR	17	9514	79.561799632		Motif:Harbinger-1_DR	169	63694	74.4471457291		Motif:Gypsy4-SM_I-int	67	70762	84.7560756507		Motif:MUDRAVI1	106	35524	64.006053945		Motif:EnSpm-15_HM	55	22871	72.6063492063		Motif:EnSpm-N10_DR	85	63654	90.1231771202		Motif:tRNA-Gly-GGY	8	4177	80.1727447217		Motif:ISL2EU-8_CGi	4	2846	84.7023809524		Motif:Gypsy-57_SB-I	5	1198	46.8334636435		Motif:ENSPM-6_ZM	3	873	59.387755102
Motif:HELITRON7_OS	17	9531	79.7039638736		Motif:TSESSEBEII	168	63862	74.6435083454		Motif:Gypsy1-I_Dmoj	66	70828	84.8351279809		Motif:EnSpm-7_HM	106	35630	64.1970414947		Motif:Sat-1_CPa	53	22924	72.7746031746		Motif:DNA3-11_Mad	84	63738	90.2421067535		Motif:Sola3-1_CapOwc	8	4185	80.3262955854		Motif:Gypsy-7_CPB-I	4	2850	84.8214285714		Motif:Gypsy-53_PM-LTR	5	1203	47.0289288507		Motif:EnSpm-5_HM	3	876	59.5918367347
Motif:hAT-N70_DR	17	9548	79.8461281151		Motif:hAT-N53_DR	163	64025	74.8340268362		Motif:DNA8-25_DR	66	70894	84.9141803112		Motif:MdoLTR2-int	103	35733	64.3826237365		Motif:L1-67_DR	53	22977	72.9428571429		Motif:Mariner-29_AEc	80	63818	90.3553730709		Motif:RMER17D	8	4193	80.4798464491		Motif:Gypsy-64_BG-I	4	2854	84.9404761905		Motif:Gypsy53-I_AG	5	1208	47.2243940579		Motif:DNA-3_FV	3	879	59.7959183673
Motif:EnSpm-30_SBi	17	9565	79.9882923566		Motif:Helitron-2_HM	162	64187	75.0233765019		Motif:Mf3_MF	65	70959	84.9920348788		Motif:Kolobok-4_DR	102	35835	64.5664042089		Motif:HATN16_DR	53	23030	73.1111111111		Motif:Crack-2_SP	80	63898	90.4686393884		Motif:RLTR51A_Mm	8	4201	80.6333973129		Motif:Gypsy-35_CGi-I	4	2858	85.0595238095		Motif:Gypsy-4_GM-I	5	1213	47.4198592651		Motif:DNA3-14_CGi	3	882	60
Motif:5SrRNA-1_BG	17	9582	80.1304565981		Motif:Transib-10_HM	160	64347	75.2103885175		Motif:CACTA_LP	65	71024	85.0698894465		Motif:EnSpm-10_HM	101	35936	64.748382912		Motif:hAT-N131_DR	53	23083	73.2793650794		Motif:TRAS3_BM	74	63972	90.573410732		Motif:Mariner-15_SIn	8	4209	80.7869481766		Motif:Gypsy-1_CMe-I	4	2862	85.1785714286		Motif:Gypsy-44_CGi-I	5	1218	47.6153244722		Motif:Dada-1_BF	3	885	60.2040816327
Motif:LSU-rRNA_Sce	16	9598	80.2642582372		Motif:Helitron-N2_DR	160	64507	75.397400533		Motif:Gypsy-71_BG-I	64	71088	85.1465462516		Motif:Gypsy-18B_PBa-I	99	36035	64.9267580764		Motif:hAT-51_HM	53	23136	73.4476190476		Motif:LatiHarb1-1	70	64042	90.6725187597		Motif:IS3EU-N1_CGi	8	4217	80.9404990403		Motif:Gypsy-19_SB-I	4	2866	85.2976190476		Motif:Gypsy-40_PT-I	5	1223	47.8107896794		Motif:Copia-75_Mad-LTR	3	888	60.4081632653
Motif:LOOPERN2_DR	16	9614	80.3980598762		Motif:hAT-42_HM	160	64667	75.5844125485		Motif:hATw-1_SP	62	71150	85.2208075315		Motif:EnSpm-4_HM	99	36134	65.1051332408		Motif:HAT1_DR	53	23189	73.6158730159		Motif:Ginger1-N1_DR	70	64112	90.7716267875		Motif:HERVIP10FH-int	8	4225	81.094049904		Motif:GRANDE1_ZD-int	4	2870	85.4166666667		Motif:Gypsy-36_NVi-I	5	1228	48.0062548866		Motif:Copia-1_SCH-I	3	891	60.612244898
Motif:HATN11B_DR	16	9630	80.5318615153		Motif:EnSpm-16_SBi	157	64824	75.7679180887		Motif:Gypsy-29_DWil-I	62	71212	85.2950688115		Motif:Gypsy-22_DWil-I	97	36231	65.2799048666		Motif:DNA-2-24_DR	53	23242	73.7841269841		Motif:HAT1_DR	63	64175	90.8608240125		Motif:hAT-N36B_DR	8	4233	81.2476007678		Motif:ERV1-1_SSc-I	4	2874	85.5357142857		Motif:Gypsy-27_MLP-I	5	1233	48.2017200938		Motif:Copia-14_BG-I	3	894	60.8163265306
Motif:ERV38_MD-int	16	9646	80.6656631544		Motif:DNA-X-5_DR	155	64979	75.9490859788		Motif:APO2_AP	62	71274	85.3693300914		Motif:Kolobok-2_AP	95	36326	65.4510729536		Motif:P-29_HM	52	23294	73.9492063492		Motif:Copia17-NVi_I-int	63	64238	90.9500212374		Motif:Gypsy-50_GA-LTR	8	4241	81.4011516315		Motif:Dada-tL_DR	4	2878	85.6547619048		Motif:EnSpm-5_HM	5	1238	48.397185301		Motif:ATCopia24I	3	897	61.0204081633
Motif:DNA8-26_DR	16	9662	80.7994647934		Motif:DNA-8-5_DR	155	65134	76.1302538688		Motif:Ambal-2_FCy	61	71335	85.4423936087		Motif:hAT-N6_ACar	95	36421	65.6222410407		Motif:P-1_DR	52	23346	74.1142857143		Motif:hAT-12_VVi	62	64300	91.0378026334		Motif:Eri-2B2_EE	8	4249	81.5547024952		Motif:CR1-2_CQ	4	2882	85.7738095238		Motif:DINOLT1	5	1243	48.5926505082		Motif:Academ-1_SK	3	900	61.2244897959
Motif:DNA2-5_DR	16	9678	80.9332664325		Motif:Chapaev-20_HM	152	65286	76.3079152836		Motif:Polinton-3_TC	59	71394	85.5130616009		Motif:DNA3-4_CGi	94	36515	65.7916073584		Motif:CryptonV-3_DR	52	23398	74.2793650794		Motif:Gypsy68-I_AG	62	64362	91.1255840294		Motif:DNA2-7_CGi	8	4257	81.7082533589		Motif:Copia-1_CMe-I	4	2886	85.8928571429		Motif:Copia-21_PX-I	5	1248	48.7881157154		Motif:XILON1_ZM-int	2	902	61.3605442177
Motif:SSU-rRNA_Sme	15	9693	81.0587054691		Motif:Gypsy-22_DWil-I	150	65436	76.4832390481		Motif:hAT-N5_ALy	59	71453	85.5837295931		Motif:Mariner-39_HM	93	36608	65.9591719068		Motif:HeT-A3_DVi	51	23449	74.4412698413		Motif:Gypsy-1_AC-I	62	64424	91.2133654255		Motif:tRNA-1_DRe	7	4264	81.8426103647		Motif:Tx1-8_AMi	3	2889	85.9821428571		Motif:CIRCE	5	1253	48.9835809226		Motif:TUBE3	2	904	61.4965986395
Motif:SSU-rRNA_Sce	15	9708	81.1841445058		Motif:HARB-4_Mad	147	65583	76.6550563374		Motif:DIRS-8B_DR	59	71512	85.6543975853		Motif:ATCopia24I	93	36701	66.1267364552		Motif:hATm-19_HM	51	23500	74.6031746032		Motif:DNA8-5_DR	61	64485	91.2997309925		Motif:RNLTR15A2	7	4271	81.9769673704		Motif:tRNA-Pro-CCY	3	2892	86.0714285714		Motif:Ambal-2_FCy	5	1258	49.1790461298		Motif:TUB2B	2	906	61.6326530612
Motif:Rex1-31_DRe	15	9723	81.3095835424		Motif:P-1_DR	144	65727	76.8233671513		Motif:SHAMUDRAV_MT	58	71570	85.7238678149		Motif:Polinton-8_NVi	92	36793	66.2924992342		Motif:hAT-N21_DR	50	23550	74.7619047619		Motif:Neptune_Hyd	60	64545	91.3846807306		Motif:Mariner-N5_HSal	7	4278	82.1113243762		Motif:TguSINE1	3	2895	86.1607142857		Motif:Ag-Jock-1	5	1263	49.374511337		Motif:TUB1	2	908	61.768707483
Motif:Penelope-12_HM	15	9738	81.435022579		Motif:Mariner-39_HM	143	65870	76.9905091402		Motif:DNA7-N1_DR	58	71628	85.7933380445		Motif:Harbinger-8_DR	91	36884	66.456460244		Motif:EnSpm-16_SBi	50	23600	74.9206349206		Motif:CR1-79_HM	60	64605	91.4696304686		Motif:LatiHarb1-2	7	4285	82.245681382		Motif:TE-5_CGi	3	2898	86.25		Motif:TUBE2	4	1267	49.5308835027		Motif:tRNA-Val-GTA	2	910	61.9047619048
Motif:Kolobok-4_DR	15	9753	81.5604616157		Motif:EnSpm-16_HM	142	66012	77.156482304		Motif:Polinton-1N1_DR	57	71685	85.8616105116		Motif:hAT-2_DR	90	36974	66.6186194843		Motif:DNA-6-N2_DR	50	23650	75.0793650794		Motif:Copia-1-I_HS	60	64665	91.5545802067		Motif:ISL2EU-8_CGi	7	4292	82.3800383877		Motif:SSU-rRNA_Sme	3	2901	86.3392857143		Motif:tRNA-Ser-TCA_	4	1271	49.6872556685		Motif:tRNA-Ile-ATT	2	912	62.0408163265
Motif:hAT-42_HM	15	9768	81.6859006523		Motif:hAT-42_Lch	140	66152	77.3201178176		Motif:Gypsy98-LTR_Dr	57	71742	85.9298829786		Motif:DIRS-21_ACar	89	37063	66.7789769554		Motif:L1_AC_7	49	23699	75.2349206349		Motif:Merlin-1_DR	58	64723	91.6366982868		Motif:hAT-2n1_DR	7	4299	82.5143953935		Motif:Sola3-1_EmiHux	3	2904	86.4285714286		Motif:tRNA-Lys-AAA	4	1275	49.8436278342		Motif:tRNAGlu_CB	2	914	62.1768707483
Motif:EnSpm-22_HMa	15	9783	81.8113396889		Motif:Mariner-N3_DR	139	66291	77.4825845061		Motif:EnSpm-43_SBi	57	71799	85.9981554456		Motif:Ginger2-1_LS	88	37151	66.9375326571		Motif:hAT-13_DR	49	23748	75.3904761905		Motif:hAT-N131_DR	58	64781	91.718816367		Motif:Harbinger2-1_MBr	7	4306	82.6487523992		Motif:Sola1-1_AC	3	2907	86.5178571429		Motif:Nematis_Cr	4	1279	50		Motif:tRNA-Asn-AAC	2	916	62.3129251701
Motif:RNLTR2d	14	9797	81.9284161231		Motif:Kolobok-3_DR	139	66430	77.6450511945		Motif:ATHATN10	56	71855	86.0652301501		Motif:ENSPM-6_ZM	87	37238	67.0942865894		Motif:ERV1-7_DR-I	49	23797	75.546031746		Motif:Polinton-2_PBa	56	64837	91.7981027892		Motif:HAL1-3A_ME	7	4313	82.783109405		Motif:RTAg3	3	2910	86.6071428571		Motif:MOSAT-2_DR	4	1283	50.1563721658		Motif:tRNA-Arg-AGA	2	918	62.4489795918
Motif:LatiHarb1-1	14	9811	82.0454925573		Motif:EnSpm-17_HM	136	66566	77.8040114077		Motif:RT1	54	71909	86.1299093294		Motif:PIVE	86	37324	67.2492387525		Motif:EnSpm-N2_DR	49	23846	75.7015873016		Motif:Mariner-52N1_HSal	56	64893	91.8773892114		Motif:Gypsy20-LTR_SP	7	4320	82.9174664107		Motif:RLG_scDEL_1_5-I	3	2913	86.6964285714		Motif:LTR160B_MD	4	1287	50.3127443315		Motif:tRNA-3_DRe	2	920	62.5850340136
Motif:Helitron-3_PM	14	9825	82.1625689915		Motif:hAT-54_HM	135	66701	77.9618027958		Motif:Gypsy-43_DWil-I	54	71963	86.1945885087		Motif:SR2A	85	37409	67.4023891461		Motif:EnSpm-2_HM	49	23895	75.8571428571		Motif:IS3EU-4_DR	56	64949	91.9566756336		Motif:EnSpm-5_HM	7	4327	83.0518234165		Motif:R1_DPs	3	2916	86.7857142857		Motif:LSU-rRNA_Mfr	4	1291	50.4691164973		Motif:TE-8_CGi	2	922	62.7210884354
Motif:hAT-N21_DR	14	9839	82.2796454257		Motif:Gypsy-17_RO-I	134	66835	78.1184253588		Motif:Gypsy-119_AA-LTR	54	72017	86.259267688		Motif:Homo6	85	37494	67.5555395398		Motif:Novosib-6_CR	48	23943	76.0095238095		Motif:DNA-N4_DR	56	65005	92.0359620558		Motif:DNA3-14_CGi	7	4334	83.1861804223		Motif:Polinton-4_NV	3	2919	86.875		Motif:L1_AC_13	4	1295	50.625488663		Motif:Sola1-2_AC	2	924	62.8571428571
Motif:SFV1-15_AMi-I	13	9852	82.3883592574		Motif:ERV1-7_DR-I	133	66968	78.2738790967		Motif:DNA9-3_DR	54	72071	86.3239468673		Motif:HMSBEAGLE_I-int	85	37579	67.7086899335		Motif:hAT-47_HM	48	23991	76.1619047619		Motif:hAT-21N2_LMi	55	65060	92.113832649		Motif:DNA3-11_Mad	7	4341	83.320537428		Motif:Polinton-3_TC	3	2922	86.9642857143		Motif:L1-7_CQ	4	1299	50.7818608288		Motif:SINE2-3_PM	2	926	62.9931972789
Motif:OK	13	9865	82.4970730891		Motif:hAT-25_DR	129	67097	78.4246575342		Motif:CACTA-1_CapOwc	53	72124	86.387428284		Motif:DNA3-8_STu	85	37664	67.8618403272		Motif:EnSpm-3_TA	48	24039	76.3142857143		Motif:Zisupton-1_DR	54	65114	92.1902874133		Motif:DIRS-8B_DR	7	4348	83.4548944338		Motif:Polinton-2_HM	3	2925	87.0535714286		Motif:Kolobok-7_CGi	4	1303	50.9382329945		Motif:RTEX-1_CR	2	928	63.1292517007
Motif:L1_AC_7	13	9878	82.6057869209		Motif:Mariner-33_HM	126	67223	78.5719294965		Motif:LTR-2_Mad-I	52	72176	86.4497119381		Motif:Polinton-3_PBa	84	37748	68.0131889516		Motif:hAT-1N1_AC	46	24085	76.4603174603		Motif:EnSpm2_PTr	53	65167	92.2653263486		Motif:Dada-1_MB	7	4355	83.5892514395		Motif:Polinton-1_PBa	3	2928	87.1428571429		Motif:Kolobok-3_Lch	4	1307	51.0946051603		Motif:RNLTR15A2	2	930	63.2653061224
Motif:L1-1_STu	13	9891	82.7145007526		Motif:L1_AC_7	126	67349	78.7192014587		Motif:ATREP18	52	72228	86.5119955922		Motif:Mariner-N13_HSal	83	37831	68.1627358066		Motif:MOSAT_DR	45	24130	76.6031746032		Motif:Mariner-39_HM	50	65217	92.336117797		Motif:Copia-92_BRa-I	7	4362	83.7236084453		Motif:MERMITE18D	3	2931	87.2321428571		Motif:IDEFIX_I-int	4	1311	51.250977326		Motif:Rex1-31_DRe	2	932	63.4013605442
Motif:hAT-N4_ALy	13	9904	82.8232145844		Motif:Transib-1_HM	125	67474	78.8653045958		Motif:SART-1_LHu	51	72279	86.5730814838		Motif:hAT-N53_DR	83	37914	68.3122826616		Motif:IS3EU-1_DR	44	24174	76.7428571429		Motif:Gypsy-53_PM-LTR	50	65267	92.4069092454		Motif:TUBE2	6	4368	83.8387715931		Motif:Mariner-N13_HSal	3	2934	87.3214285714		Motif:HSATII	4	1315	51.4073494918		Motif:PRIMA4-int	2	934	63.537414966
Motif:hAT-310_Ami	13	9917	82.9319284161		Motif:Mariner-N5_HSal	125	67599	79.0114077329		Motif:hAT-7N2_PM	50	72329	86.6329696128		Motif:hAT-N131_DR	83	37997	68.4618295166		Motif:Helitron-2_DR	44	24218	76.8825396825		Motif:ERV1-N6-I_DR	50	65317	92.4777006938		Motif:tRNA-Asp-GAY	6	4374	83.9539347409		Motif:Mariner-7_DYa	3	2937	87.4107142857		Motif:Helitron-2_DR	4	1319	51.5637216575		Motif:Polinton-5_NVi	2	936	63.6734693878
Motif:hAT-1960_Ami	13	9930	83.0406422479		Motif:DNA-1-2_DR	121	67720	79.1528355697		Motif:ERV1-N3-I_DR	50	72379	86.6928577417		Motif:Dada-U6_SS	83	38080	68.6113763716		Motif:Harbinger-2_DR	44	24262	77.0222222222		Motif:DNA9-5_DR	50	65367	92.5484921421		Motif:TE7-1_FV	6	4380	84.0690978887		Motif:LTR18F_ML	3	2940	87.5		Motif:Helitron-1_DR	4	1323	51.7200938233		Motif:Polinton-4_SP	2	938	63.8095238095
Motif:tRNA-Asp-GAY	12	9942	83.1409934772		Motif:hATm-19_HM	120	67840	79.2930945813		Motif:DongAG	49	72428	86.7515481081		Motif:Poseidon-2B_PM	82	38162	68.7591214573		Motif:Gypsy-120_SB-I	43	24305	77.1587301587		Motif:Polinton-9_NVi	49	65416	92.6178677616		Motif:RLTR32_Rn	6	4386	84.1842610365		Motif:LTR160B_MD	3	2943	87.5892857143		Motif:hAT-N5_ACar	4	1327	51.8764659891		Motif:Novosib-3_CR	2	940	63.9455782313
Motif:TRAS3_BM	12	9954	83.2413447065		Motif:RLTR17B_Mm	117	67957	79.4298471177		Motif:Perere-9	48	72476	86.809040712		Motif:hAT-2N1_TC	82	38244	68.9068665429		Motif:EnSpm2_SB	43	24348	77.2952380952		Motif:HAT-4N1_Mad	49	65465	92.687243381		Motif:polypurine	6	4392	84.2994241843		Motif:LSU-rRNA_Sce	3	2946	87.6785714286		Motif:Harbinger-5_PSt	4	1331	52.0328381548		Motif:Nimb-4_DR	2	942	64.0816326531
Motif:L1-67_DR	12	9966	83.3416959358		Motif:IMPB_01	116	68073	79.5654308289		Motif:Gypsy-63_CQ-I	48	72524	86.8665333158		Motif:DNA6-6_DR	81	38325	69.0528098593		Motif:MuDR-4_GM	42	24390	77.4285714286		Motif:Polinton-1N1_DR	48	65513	92.7552031715		Motif:Polinton-4_SP	6	4398	84.4145873321		Motif:Jockey_Ele2	3	2949	87.7678571429		Motif:Gypsy-8_DRh-I	4	1335	52.1892103206		Motif:MuDR-7_VV	2	944	64.2176870748
Motif:hAT-50_HM	12	9978	83.4420471651		Motif:Chapaev-6_HM	116	68189	79.7010145402		Motif:IS3EU-4_DR	47	72571	86.922828157		Motif:TE-X-4_DR	80	38405	69.1969514063		Motif:Helitron-N1_PBa	42	24432	77.5619047619		Motif:MinoAg1	48	65561	92.8231629619		Motif:Merlin-1_DR	6	4404	84.5297504798		Motif:Jockey-5_CQ	3	2952	87.8571428571		Motif:Gypsy-80_PAb-I	4	1339	52.3455824863		Motif:MuDR1_ZM	2	946	64.3537414966
Motif:HAT-4N1_Mad	12	9990	83.5423983944		Motif:TE-2_XT	114	68303	79.8342606012		Motif:L1-2_STu	45	72616	86.9767274731		Motif:Gypsy-34_NVi-I	79	38484	69.3392911839		Motif:Gypsy1-I_Dmoj	42	24474	77.6952380952		Motif:HAL1-2a_MD	48	65609	92.8911227524		Motif:Mariner-N22_HSal	6	4410	84.6449136276		Motif:ISL2EU-N4_CGi	3	2955	87.9464285714		Motif:Gypsy-6_FV-I	4	1343	52.5019546521		Motif:MERMITE18F	2	948	64.4897959184
Motif:hAT-2N1_TC	12	10002	83.6427496237		Motif:Helitron-3_PM	114	68417	79.9675066623		Motif:Gypsy-20_PGr-I	45	72661	87.0306267892		Motif:hAT6-2_NV	78	38562	69.4798291923		Motif:DNA-1-2_DR	42	24516	77.8285714286		Motif:L1-53_DR	47	65656	92.9576667139		Motif:LTR1A2_ML	6	4416	84.7600767754		Motif:Homo10	3	2958	88.0357142857		Motif:Gypsy-58_BG-I	4	1347	52.6583268178		Motif:Mariner-N13_HSal	2	950	64.6258503401
Motif:HARB-4N1_Mad	12	10014	83.743100853		Motif:Gypsy-15_DAn-I	112	68529	80.0984150732		Motif:Dada-tL_DR	45	72706	87.0845261052		Motif:ERV1-1_SSc-I	78	38640	69.6203672006		Motif:Gypsy6-I_Dmoj	41	24557	77.9587301587		Motif:NAVIRTE1	46	65702	93.0227948464		Motif:hAT-4_PBa	6	4422	84.8752399232		Motif:Helitron-N3_DR	3	2961	88.125		Motif:Gypsy43-I_AG	4	1351	52.8146989836		Motif:MarinerL-1_CR	2	952	64.7619047619
Motif:ERV1-1_SSc-I	12	10026	83.8434520823		Motif:TRAS1	111	68640	80.2281546589		Motif:L2-27_ACar	44	72750	87.1372276587		Motif:EnSpm-2_TD	77	38717	69.7591034396		Motif:EnSpm-14_HM	41	24598	78.0888888889		Motif:Mariner-101_HSal	46	65748	93.0879229789		Motif:EnSpm-1_HV	6	4428	84.990403071		Motif:hAT-N71_DR	3	2964	88.2142857143		Motif:Gypsy-3_PX-I	4	1355	52.9710711493		Motif:Mariner-13_SIn	2	954	64.8979591837
Motif:DNA9TA1_DR	12	10038	83.9438033116		Motif:HeT-A3_DVi	110	68750	80.3567254196		Motif:ARS_EH	44	72794	87.1899292122		Motif:hATN-4_ACar	75	38792	69.8942361399		Motif:Transib-3_HM	40	24638	78.2158730159		Motif:Helitron-3_PM	45	65793	93.1516352825		Motif:DNA-8-3_HM	6	4434	85.1055662188		Motif:hAT-N53_DR	3	2967	88.3035714286		Motif:Gypsy-36_ST-I	4	1359	53.1274433151		Motif:LOOPERN3_DR	2	956	65.0340136054
Motif:CR1-1_NV	12	10050	84.0441545409		Motif:CR1-80_HM	110	68860	80.4852961803		Motif:hAT-2n1_DR	43	72837	87.2414330032		Motif:Chapaev-8_HM	75	38867	70.0293688402		Motif:Kolobok-3_Aplcal	40	24678	78.3428571429		Motif:HARB-4N1_Mad	43	65836	93.2125159281		Motif:DNA-2-18_DR	6	4440	85.2207293666		Motif:hAT-21N2_LMi	3	2970	88.3928571429		Motif:Gypsy35-I_DR	4	1363	53.2838154808		Motif:LOOPERN2_DR	2	958	65.1700680272
Motif:Chapaev-8_HM	12	10062	84.1445057702		Motif:Mariner-36_HM	109	68969	80.6126981159		Motif:hAT-12_VVi	43	72880	87.2929367941		Motif:Gypsy-71_BG-I	73	38940	70.1608980018		Motif:Mariner-N3_DR	38	24716	78.4634920635		Motif:DNA-8-3_HM	43	65879	93.2733965737		Motif:ATCopia24I	6	4446	85.3358925144		Motif:Harbinger2N_TP	3	2973	88.4821428571		Motif:Gypsy-2_DSe-I	4	1367	53.4401876466		Motif:LatiHarb1-2	2	960	65.306122449
Motif:RMER12	11	10073	84.2364943971		Motif:Gypsy82-LTR_Dr	108	69077	80.7389312263		Motif:CR1-78_AAe	43	72923	87.344440585		Motif:Ginger1-10_HM	73	39013	70.2924271635		Motif:Sola1-1_AC	37	24753	78.580952381		Motif:Copia2-LTR_VC	43	65922	93.3342772193		Motif:tRNA-Ser-TCG	5	4451	85.4318618042		Motif:Gypsy82-LTR_Dr	3	2976	88.5714285714		Motif:Gypsy-2_Crp-I	4	1371	53.5965598124		Motif:L1-8_CR	2	962	65.4421768707
Motif:RLTR20C1_MM	11	10084	84.3284830239		Motif:hAT-N68_DR	104	69181	80.8604890364		Motif:TELREP1_PC	42	72965	87.3947466133		Motif:ERV46_MD_I-int	73	39086	70.4239563251		Motif:Mariner-33_HM	37	24790	78.6984126984		Motif:Tx1-5_PM	42	65964	93.393742036		Motif:tRNA-Gln-CAA	5	4456	85.527831094		Motif:Gypsy-6_DEu-I	3	2979	88.6607142857		Motif:Gypsy-28-I_DR	4	1375	53.7529319781		Motif:L1-87_ACar	2	964	65.5782312925
Motif:Polinton-1_PBa	11	10095	84.4204716508		Motif:hAT-13_DR	104	69285	80.9820468465		Motif:RTEX-4_CGi	42	73007	87.4450526417		Motif:EnSpm-1_HM	73	39159	70.5554854867		Motif:Gypsy1-SM_LTR	37	24827	78.8158730159		Motif:Mariner-21_SIn	42	66006	93.4532068526		Motif:RMER17C2	5	4461	85.6238003839		Motif:Gypsy-5_PX-I	3	2982	88.75		Motif:Gypsy-24-I_SP	4	1379	53.9093041439		Motif:L1-1_VC	2	966	65.7142857143
Motif:MINIME_DN	11	10106	84.5124602776		Motif:Penelope-12_HM	102	69387	81.1012670064		Motif:Polinton-2_NV	42	73049	87.49535867		Motif:DNA-8-27_DR	73	39232	70.6870146484		Motif:EnSpm-10_HM	37	24864	78.9333333333		Motif:TE-X-4_NVi	41	66047	93.5112558403		Motif:Rex1-31_DRe	5	4466	85.7197696737		Motif:Gypsy58-I_AG	3	2985	88.8392857143		Motif:Gypsy-23_Crp-I	4	1383	54.0656763096		Motif:Kiri-35_AAe	2	968	65.8503401361
Motif:L1-56_DR	11	10117	84.6044489045		Motif:TART_DV	98	69485	81.2158118659		Motif:Penelope-1_DR	42	73091	87.5456646983		Motif:L1-4_VC	72	39304	70.8167420407		Motif:Homo6	36	24900	79.0476190476		Motif:ISL2EU-3_CFl	41	66088	93.569304828		Motif:Polinton-5_NVi	5	4471	85.8157389635		Motif:Gypsy55-I_AG	3	2988	88.9285714286		Motif:Gypsy-23_CQ-I	4	1387	54.2220484754		Motif:Jockey-2_DGri	2	970	65.9863945578
Motif:Kolobok-2_DR	11	10128	84.6964375314		Motif:P-34_HM	97	69582	81.3291879003		Motif:P4_AG	42	73133	87.5959707267		Motif:HELITRON7_OS	72	39376	70.946469433		Motif:Helitron-2_HM	36	24936	79.1619047619		Motif:Dada-tL_DR	41	66129	93.6273538157		Motif:Polinton-1_DR	5	4476	85.9117082534		Motif:Gypsy-32_ADe-I	3	2991	89.0178571429		Motif:Gypsy-22_FV-I	4	1391	54.3784206411		Motif:IS3EU-N1_CGi	2	972	66.1224489796
Motif:Harbinger-2_DR	11	10139	84.7884261582		Motif:hAT-N107_DR	97	69679	81.4425639347		Motif:CR1-15_HM	42	73175	87.646276755		Motif:ERV1-7_DR-I	70	39446	71.0725932866		Motif:SR2A	35	24971	79.273015873		Motif:Copia3-I_CR	41	66170	93.6854028033		Motif:NUSIF1_TM	5	4481	86.0076775432		Motif:Gypsy-1_FV-I	3	2994	89.1071428571		Motif:Gypsy-204_ZM-I	4	1395	54.5347928069		Motif:HERVIP10FH-int	2	974	66.2585034014
Motif:Gypsy-6_LCh-I	11	10150	84.8804147851		Motif:Gypsy-6_LCh-I	97	69776	81.5559399691		Motif:Gypsy6-I_Dmoj	41	73216	87.6953850208		Motif:EnSpm-6N1_DR	70	39516	71.1987171402		Motif:P-1_PBa	35	25006	79.3841269841		Motif:Sat-1_TSy	39	66209	93.7406201331		Motif:Mariner-52_HSal	5	4486	86.103646833		Motif:Ginger1-1_AC	3	2997	89.1964285714		Motif:Gypsy1-PP_I-int	4	1399	54.6911649726		Motif:HERVFH21-int	2	976	66.3945578231
Motif:Gypsy-21_PBa-LTR	11	10161	84.9724034119		Motif:Gypsy-4_Trm-I	96	69872	81.6681471785		Motif:Kolobok-N1_AEc	40	73256	87.743295524		Motif:DNA-1-8_DR	70	39586	71.3248409939		Motif:L1-11_DR	35	25041	79.4952380952		Motif:LOOPERN3_DR	39	66248	93.7958374628		Motif:Mariner-16_SIn	5	4491	86.1996161228		Motif:EnSpm-N14_DR	3	3000	89.2857142857		Motif:Gypsy-17_BD-I	4	1403	54.8475371384		Motif:Helitron-N35_CGi	2	978	66.5306122449
Motif:Z-REP	10	10171	85.0560294364		Motif:EnSpm-9_DR	95	69967	81.7791855627		Motif:Helitron-2_DR	40	73296	87.7912060271		Motif:EnSpm-21_HMa	69	39655	71.4491630781		Motif:Kolobok-2_AP	35	25076	79.6063492063		Motif:L1-4_VC	39	66287	93.8510547926		Motif:Mariner-13_SIn	5	4496	86.2955854127		Motif:EnSpm-7_DR	3	3003	89.375		Motif:Gypsy-17_ADe-I	4	1407	55.0039093041		Motif:Helitron-N1_HSal	2	980	66.6666666667
Motif:SINE_VV	10	10181	85.1396554608		Motif:DNA-2-32_DR	95	70062	81.8902239469		Motif:Gypsy-4_PPP-I	40	73336	87.8391165303		Motif:ZFERV-2-I_DR	68	39723	71.5716833931		Motif:Gypsy-31-LTR_DR	35	25111	79.7174603175		Motif:RLTR20C2_MM	38	66325	93.9048562934		Motif:L1-11_DR	5	4501	86.3915547025		Motif:EnSpm-1_HV	3	3006	89.4642857143		Motif:Gypsy-15_FV-I	4	1411	55.1602814699		Motif:Helitron-3_ZM	2	982	66.8027210884
Motif:Mariner-N39_HSal	10	10191	85.2232814852		Motif:Academ-1_HM	95	70157	82.0012623311		Motif:EnSpm2_PTr	40	73376	87.8870270335		Motif:Helitron-3N3_PM	67	39790	71.6924019387		Motif:DNA-X-5_DR	35	25146	79.8285714286		Motif:Poseidon-2B_PM	38	66363	93.9586577941		Motif:ISL2EU-N5B_CGi	5	4506	86.4875239923		Motif:DNA-TTAA0-4_DR	3	3009	89.5535714286		Motif:Gypsy-11_PPa-I	4	1415	55.3166536357		Motif:hAT-N35B_DR	2	984	66.9387755102
Motif:Mariner-16_SIn	10	10201	85.3069075096		Motif:Dada-1_BF	93	70250	82.1099630651		Motif:MuDR-10_GM	39	73415	87.9337397741		Motif:Daphne-73_HMa	67	39857	71.8131204843		Motif:Chapaev-6_HM	35	25181	79.9396825397		Motif:HAT-4_Mad	38	66401	94.0124592949		Motif:hAT-310_Ami	5	4511	86.5834932821		Motif:DNA8-5_DR	3	3012	89.6428571429		Motif:Gypsy119-I_DR	4	1419	55.4730258014		Motif:hAT-N34_DR	2	986	67.074829932
Motif:Mariner-14_SIn	10	10211	85.390533534		Motif:Sola2-1_HM	92	70342	82.2174949741		Motif:EnSpm1_HV	39	73454	87.9804525147		Motif:Helitron-N1_PBa	66	39923	71.9320372606		Motif:Chapaev-20_HM	35	25216	80.0507936508		Motif:hAT-21_CPB	38	66439	94.0662607957		Motif:hAT-2_HM	5	4516	86.679462572		Motif:DNA6-1_SP	3	3015	89.7321428571		Motif:GYPSHAN3_I_MT-int	4	1423	55.6293979672		Motif:hAT-N2_CPB	2	988	67.2108843537
Motif:Mariner-13_SIn	10	10221	85.4741595585		Motif:LTR-12D_Gav	92	70434	82.325026883		Motif:CryptonS-1_PR	38	73492	88.0259674927		Motif:Gypsy-88_CQ-I	65	39988	72.0491522675		Motif:OposCharlie1	34	25250	80.1587301587		Motif:Copia-96_SB-I	38	66477	94.1200622965		Motif:Gypsy82-LTR_Dr	5	4521	86.7754318618		Motif:DNA3-10_CGi	3	3018	89.8214285714		Motif:GYLES1_I-int	4	1427	55.7857701329		Motif:HATN11B_DR	2	990	67.3469387755
Motif:Gypsy-8_HMM-LTR	10	10231	85.5577855829		Motif:DNA-8-1_HM	92	70526	82.4325587919		Motif:Sola3-1_BF	36	73528	88.0690869456		Motif:Mariner-29_HM	64	40052	72.1644655051		Motif:Mariner-39_HM	34	25284	80.2666666667		Motif:MuDR1_ZM	37	66514	94.1724479683		Motif:Gypsy61-I_AG	5	4526	86.8714011516		Motif:Dada-U6_GA	3	3021	89.9107142857		Motif:EnSpm-N1_AT	4	1431	55.9421422987		Motif:hAT6-2_SP	2	992	67.4829931973
Motif:Galileo_DM	10	10241	85.6414116073		Motif:SAT-13_DR	91	70617	82.5389218757		Motif:REP-4_PBa	36	73564	88.1122063984		Motif:Kolobok-2_DR	64	40116	72.2797787427		Motif:hAT-2_DR	34	25318	80.3746031746		Motif:Helitron-N1_HSal	37	66551	94.2248336401		Motif:Gypsy-22-LTR_DR	5	4531	86.9673704415		Motif:Copia-58_BG-I	3	3024	90		Motif:EnSpm2_TM	4	1435	56.0985144644		Motif:hAT-2n1_DR	2	994	67.619047619
Motif:ERV1-7_DR-I	10	10251	85.7250376317		Motif:CR1-1_NV	90	70707	82.6441161345		Motif:L1_AC_7	36	73600	88.1553258513		Motif:DNA-1-2_DR	64	40180	72.3950919803		Motif:DIRS-2_MLP-I	34	25352	80.4825396825		Motif:hAT-N13_AMi	37	66588	94.2772193119		Motif:EnSpm-N14_DR	5	4536	87.0633397313		Motif:Copia-14_BG-I	3	3027	90.0892857143		Motif:DNA-2-32_DR	4	1439	56.2548866302		Motif:HAT1_DR	2	996	67.7551020408
Motif:EnSpm-2_HM	10	10261	85.8086636561		Motif:Gypsy6-NVi_LTR	88	70795	82.746972743		Motif:Gypsy61-I_AG	36	73636	88.1984453042		Motif:DIRS-8_DR	64	40244	72.5104052179		Motif:Harbinger-1_XT	33	25385	80.5873015873		Motif:Mariner-N41_HSal	36	66624	94.3281891548		Motif:DNA3-13B_CGi	5	4541	87.1593090211		Motif:CLOUD-7	3	3030	90.1785714286		Motif:DIRS-4_DR	4	1443	56.4112587959		Motif:hAT-16N2_LMi	2	998	67.8911564626
Motif:EnSpm-21_HMa	10	10271	85.8922896805		Motif:hAT-80_HM	87	70882	82.8486605264		Motif:Gypsy68-I_AG	35	73671	88.2403669945		Motif:CACTA_LP	63	40307	72.6239166862		Motif:Mariner-36_HM	32	25417	80.6888888889		Motif:Gypsy-9-I_CR	36	66660	94.3791589976		Motif:Copia3-I_XT	5	4546	87.2552783109		Motif:Ves2B_ML	2	3032	90.2380952381		Motif:Crack-11_AAe	4	1447	56.5676309617		Motif:Gypsy-9_DPu-I	2	1000	68.0272108844
Motif:DNA-2-12_DR	10	10281	85.975915705		Motif:Gypsy-41_AA-I	86	70968	82.9491794848		Motif:Jockey-3_DPer	34	73705	88.2810909222		Motif:hAT-N5_ACar	61	40368	72.7338246158		Motif:hAT-54_HM	32	25449	80.7904761905		Motif:Gypsy-22_SB-I	36	66696	94.4301288404		Motif:Copia-27_PAb-I	5	4551	87.3512476008		Motif:Tx1-10_SK	2	3034	90.2976190476		Motif:Copia15-VV_I-int	4	1451	56.7240031274		Motif:Gypsy-74-I_ZM	2	1002	68.1632653061
Motif:tRNA-1_DRe	9	10290	86.0511791269		Motif:Transib-6_HM	85	71053	83.048529618		Motif:Helitron-4_DR	34	73739	88.3218148499		Motif:RTAg4	60	40428	72.841930776		Motif:EnSpm-16_HM	32	25481	80.8920634921		Motif:Gypsy-22_DWil-I	36	66732	94.4810986833		Motif:Copia-17_SB-I	5	4556	87.4472168906		Motif:TUBE2	2	3036	90.3571428571		Motif:Caulimovirus-1_PD	4	1455	56.8803752932		Motif:Gypsy-6_AEc-LTR	2	1004	68.2993197279
Motif:TE-2_XT	9	10299	86.1264425489		Motif:DIRS-8B_DR	85	71138	83.1478797513		Motif:Gypsy-31-LTR_DR	34	73773	88.3625387776		Motif:L1-55_XT	60	40488	72.9500369363		Motif:DIRS-15B_DR	32	25513	80.9936507937		Motif:Polinton-5_NVi	35	66767	94.5306526972		Motif:U6	4	4560	87.5239923225		Motif:TE-X-5_DR	2	3038	90.4166666667		Motif:ATHATN10	4	1459	57.036747459		Motif:Gypsy-53_PM-LTR	2	1006	68.4353741497
Motif:Polinton-1N1_DR	9	10308	86.2017059709		Motif:Gypsy-18_RP-I	84	71222	83.2460610594		Motif:DINOLT1	34	73807	88.4032627053		Motif:HARB-6_ALy	60	40548	73.0581430965		Motif:Transib-1_HM	31	25544	81.0920634921		Motif:MonoRep558	35	66802	94.580206711		Motif:tRNA-Phe-TTY	4	4564	87.6007677543		Motif:Sola2-1_EmiHux	2	3040	90.4761904762		Motif:5S-Sauria	4	1463	57.1931196247		Motif:Gypsy-51_GA-LTR	2	1008	68.5714285714
Motif:Mariner-N10_SIn	9	10317	86.2769693929		Motif:EnSpm-5_HM	83	71305	83.3430735425		Motif:P-30_HM	33	73840	88.4427888704		Motif:Zisupton-1_DR	59	40607	73.1644474874		Motif:Transib-10_HM	31	25575	81.1904761905		Motif:Harbinger-2_LCh	35	66837	94.6297607249		Motif:tRNA-Leu-CTY	4	4568	87.6775431862		Motif:RTEX-1_CR	2	3042	90.5357142857		Motif:VIHAT3	3	1466	57.310398749		Motif:Gypsy-23-LTR_NVi	2	1010	68.7074829932
Motif:LatiHarb1-N3A	9	10326	86.3522328149		Motif:Mariner-79B_HSal	81	71386	83.4377483753		Motif:L2_AC_2	33	73873	88.4823150355		Motif:Polinton-2_HM	59	40666	73.2707518783		Motif:Gypsy-6_LCh-I	31	25606	81.2888888889		Motif:Copia-3_PSH-I	35	66872	94.6793147388		Motif:ROO_I-int	4	4572	87.754318618		Motif:RTE-1_Crp	2	3044	90.5952380952		Motif:Ves2_ML	3	1469	57.4276778733		Motif:Gypsy-21_PBa-LTR	2	1012	68.843537415
Motif:Harbinger-1_XT	9	10335	86.4274962368		Motif:L1-3_CR	81	71467	83.5324232082		Motif:EnSpm6_SB	33	73906	88.5218412006		Motif:L1-48_DR	58	40724	73.3752544999		Motif:TE-X-4_DR	30	25636	81.3841269841		Motif:MuDR-10_GM	34	66906	94.7274529237		Motif:RLTR20A4	4	4576	87.8310940499		Motif:RNLTR15A2	2	3046	90.6547619048		Motif:tRNASerTCT_CB	3	1472	57.5449569977		Motif:Gypsy-1_CMe-I	2	1014	68.9795918367
Motif:EnSpm-N10_DR	9	10344	86.5027596588		Motif:Gypsy-25_SB-I	80	71547	83.625929216		Motif:L1-53_DR	32	73938	88.5601696032		Motif:DIRS-8B_DR	58	40782	73.4797571215		Motif:PIVE	30	25666	81.4793650794		Motif:Mariner-52_HSal	34	66940	94.7755911086		Motif:polypyrimidine	4	4580	87.9078694818		Motif:RLTR20A4	2	3048	90.7142857143		Motif:TE-X-4_NVi	3	1475	57.662236122		Motif:Ginger2-1_LS	2	1016	69.1156462585
Motif:EnSpm8_SB	9	10353	86.5780230808		Motif:P-1_LHu	79	71626	83.7182663986		Motif:hAT-N47B_DR	32	73970	88.5984980057		Motif:MuDR-5_VV	57	40839	73.5824579737		Motif:P-35_HM	30	25696	81.5746031746		Motif:Helitron-N1_PBa	34	66974	94.8237292935		Motif:Polinton-2_PBa	4	4584	87.9846449136		Motif:RLG_scMaximus_1_8-I	2	3050	90.7738095238		Motif:TE-5_CGi	3	1478	57.7795152463		Motif:Ginger1-2_DR	2	1018	69.2517006803
Motif:DNA9-5_DR	9	10362	86.6532865028		Motif:hATm-54_HM	78	71704	83.8094347562		Motif:HAT1_DR	32	74002	88.6368264083		Motif:MuDR-4_GM	57	40896	73.685158826		Motif:CR1-48_HM	29	25725	81.6666666667		Motif:Mariner-4_LHu	33	67007	94.8704516494		Motif:Novosib-3_CR	4	4588	88.0614203455		Motif:RLG_scDEL_1_3-I	2	3052	90.8333333333		Motif:Sushi_I-int	3	1481	57.8967943706		Motif:ERV-5_AMi-I	2	1020	69.387755102
Motif:Ag-Jock-1	9	10371	86.7285499247		Motif:hAT-50_HM	77	71781	83.8994342887		Motif:DNA4-3_CQ	32	74034	88.6751548108		Motif:LSU-rRNA_Sce	57	40953	73.7878596782		Motif:P-34_HM	28	25753	81.7555555556		Motif:Helitron-1_DT	33	67040	94.9171740054		Motif:Neptune3_Ren	4	4592	88.1381957774		Motif:R1_DMo	2	3054	90.8928571429		Motif:SINE2-1_Pca	3	1484	58.0140734949		Motif:ERV1-N3-I_DR	2	1022	69.5238095238
Motif:tRNAGlu_CB	8	10379	86.7954507443		Motif:Kolobok-2_DR	76	71857	83.988264996		Motif:L2-8_NVi	31	74065	88.7122854508		Motif:Jockey-3_DGri	57	41010	73.8905605304		Motif:MUDRAVI1	28	25781	81.8444444444		Motif:Ginger2-1_LS	33	67073	94.9638963613		Motif:MinoAg1	4	4596	88.2149712092		Motif:Poseidon-2B_PM	2	3056	90.9523809524		Motif:RTE-5_LCh	3	1487	58.1313526192		Motif:EnSpm-N10_DR	2	1024	69.6598639456
Motif:tRNACysGCA_CB	8	10387	86.8623515638		Motif:MuDR1_HV	75	71932	84.0759268783		Motif:L1-2_VC	31	74096	88.7494160907		Motif:Copia-58_BG-I	57	41067	73.9932613827		Motif:tRNA-3_DRe	27	25808	81.9301587302		Motif:ERV1-7_DR-I	33	67106	95.0106187173		Motif:MERMITE18B	4	4600	88.2917466411		Motif:Novosib-3_CR	2	3058	91.0119047619		Motif:RIRE8A_I-int	3	1490	58.2486317435		Motif:EnSpm1n_AT	2	1026	69.7959183673
Motif:SSU-rRNA_Lvi	8	10395	86.9292523833		Motif:Gypsy-16_RO-I	75	72007	84.1635887606		Motif:ATCopia28_I-int	31	74127	88.7865467307		Motif:DNA-3_FV	56	41123	74.0941604656		Motif:P-2_HM	27	25835	82.0158730159		Motif:ROO_I-int	32	67138	95.0559252442		Motif:Mariner-N13_HSal	4	4604	88.3685220729		Motif:Neptune3_Ren	2	3060	91.0714285714		Motif:R5-1_SM	3	1493	58.3659108679		Motif:EnSpm1_HV	2	1028	69.9319727891
Motif:RTAg4	8	10403	86.9961532029		Motif:Chapaev-7_HM	75	72082	84.2512506429		Motif:RLG_scMaximus_2_1-I	30	74157	88.8224796081		Motif:Gypsy-53_PM-LTR	55	41178	74.1932577791		Motif:hAT-N6_ACar	27	25862	82.1015873016		Motif:Harbinger2N_TP	32	67170	95.1012317712		Motif:LTR-12D_Gav	4	4608	88.4452975048		Motif:MuDR-N1_ZM	2	3062	91.130952381		Motif:R1_Ele4	3	1496	58.4831899922		Motif:DNA8-12_CGi	2	1030	70.0680272109
Motif:Rhin-1	8	10411	87.0630540224		Motif:P-2_HM	74	72156	84.3377437		Motif:hAT-N70_DR	30	74187	88.8584124855		Motif:Ves2_ML	54	41232	74.2905533234		Motif:Harbinger-1_DR	27	25889	82.1873015873		Motif:TE-X-5_DR	31	67201	95.1451224692		Motif:LSU-rRNA_Hca	4	4612	88.5220729367		Motif:LTR42_MD	2	3064	91.1904761905		Motif:Polinton-9_NVi	3	1499	58.6004691165		Motif:DNA4-24_CGi	2	1032	70.2040816327
Motif:MER4-int	8	10419	87.1299548419		Motif:DNA9-6_DR	74	72230	84.4242367572		Motif:Harbinger-5_CGi	30	74217	88.8943453629		Motif:TE-X-4_NVi	54	41286	74.3878488676		Motif:Gypsy-10_PBa-LTR	27	25916	82.273015873		Motif:Gypsy-35_CGi-I	31	67232	95.1890131672		Motif:LIMPET1	4	4616	88.5988483685		Motif:LTR24_Sar	2	3066	91.25		Motif:Polinton-8_NVi	3	1502	58.7177482408		Motif:DNA3-1_CGi	2	1034	70.3401360544
Motif:Mariner-14_LCh	8	10427	87.1968556615		Motif:Kolobok-2_AP	73	72303	84.5095609893		Motif:Merlin-1_DR	29	74246	88.9290804777		Motif:L1-56_DR	54	41340	74.4851444118		Motif:SPMLIKE	26	25942	82.3555555556		Motif:PRIMA4-int	30	67262	95.2314880362		Motif:IS3EU-4_DR	4	4620	88.6756238004		Motif:L2B-4B_AAe	2	3068	91.3095238095		Motif:Polinton-5_SP	3	1505	58.8350273651		Motif:DNA2-7_CGi	2	1036	70.4761904762
Motif:LSU-rRNA_Ath	8	10435	87.263756481		Motif:EnSpm-12_OS	73	72376	84.5948852214		Motif:L2_AC_15	29	74275	88.9638155925		Motif:Helitron-9_CGi	54	41394	74.582439956		Motif:piggyBac-N5_DR	26	25968	82.4380952381		Motif:Nematis_Cr	30	67292	95.2739629053		Motif:HATN11B_DR	4	4624	88.7523992322		Motif:L1-N3_FV	2	3070	91.369047619		Motif:Polinton-3_PBa	3	1508	58.9523064894		Motif:DNA2-6_CGi	2	1038	70.612244898
Motif:EnSpm-17_HM	8	10443	87.3306573006		Motif:Chapaev-3B_HM	70	72446	84.6767029782		Motif:L2-17_NV	29	74304	88.9985507073		Motif:Gypsy3-LTR_AP	54	41448	74.6797355003		Motif:LSU-rRNA_Mfr	26	25994	82.5206349206		Motif:Copia-1_ES-I	30	67322	95.3164377743		Motif:hAT-42_Lch	4	4628	88.8291746641		Motif:L1-6_CR	2	3072	91.4285714286		Motif:Mariner-3_PGr	3	1511	59.0695856138		Motif:DIRS-15B_DR	2	1040	70.7482993197
Motif:CryptonV-3_DR	8	10451	87.3975581201		Motif:ACROBAT1	69	72515	84.7573519099		Motif:IS3EU-1_DR	29	74333	89.0332858221		Motif:CR1-78_AAe	54	41502	74.7770310445		Motif:Gypsy-18_PBa-I	26	26020	82.6031746032		Motif:Gypsy98-LTR_Dr	29	67351	95.3574968144		Motif:HAT-10_Mad	4	4632	88.905950096		Motif:L1-45_AAe	2	3074	91.4880952381		Motif:MamSINE1	3	1514	59.1868647381		Motif:Copia-47_Mad-LTR	2	1042	70.8843537415
Motif:ZFERV-2-I_DR	7	10458	87.4560963372		Motif:LSU-rRNA_Mfr	68	72583	84.8368320165		Motif:Gypsy-8_SCH-I	29	74362	89.0680209369		Motif:TE-5_CGi	52	41554	74.87072305		Motif:EnSpm-1_TA	26	26046	82.6857142857		Motif:Gypsy37-I_AG	29	67380	95.3985558545		Motif:Gypsy-6_AEc-LTR	4	4636	88.9827255278		Motif:L1-2_VC	2	3076	91.5476190476		Motif:LTR1A2_ML	3	1517	59.3041438624		Motif:Copia-42_SB-I	2	1044	71.0204081633
Motif:tRNA-Val-GTA	7	10465	87.5146345543		Motif:DNA8-10_DR	68	72651	84.9163121231		Motif:ERV1-N7-I_DR	29	74391	89.1027560517		Motif:LTR42_MD	52	41606	74.9644150556		Motif:DNA-8-5_DR	26	26072	82.7682539683		Motif:Gypsy-1_CMe-LTR	29	67409	95.4396148945		Motif:Gypsy37-I_AG	4	4640	89.0595009597		Motif:L1-20b_Lch	2	3078	91.6071428571		Motif:L2_AC_2	3	1520	59.4214229867		Motif:CLOUD-7	2	1046	71.156462585
Motif:tRNA-Ser-TCG	7	10472	87.5731727714		Motif:Helitron-1_DR	67	72718	84.9946234046		Motif:EnSpm-N14_DR	29	74420	89.1374911665		Motif:LSU-rRNA_Hca	52	41658	75.0581070611		Motif:L1A-2_MD	25	26097	82.8476190476		Motif:DNA-11_CGi	29	67438	95.4806739346		Motif:Gypsy-32_ADe-I	4	4644	89.1362763916		Motif:Kolobok-N1_AEc	2	3080	91.6666666667		Motif:L1Hylob	3	1523	59.538702111		Motif:BHIKHARI-5-I_DR	2	1048	71.2925170068
Motif:TDR13	7	10479	87.6317109885		Motif:EnSpm-1_TA	67	72785	85.0729346861		Motif:Mariner-N13_HSal	28	74448	89.1710285187		Motif:Mariner-79B_HSal	51	41709	75.1499972973		Motif:tRNA-Gln-CAA	24	26121	82.9238095238		Motif:CACTA-1_CapOwc	29	67467	95.5217329747		Motif:EnSpm-N13_DR	4	4648	89.2130518234		Motif:Jockey-3_DPer	2	3082	91.7261904762		Motif:Jockey-3_DGri	3	1526	59.6559812353		Motif:Waldo-3_AAe	1	1049	71.3605442177
Motif:SSU-rRNA_Ath	7	10486	87.6902492056		Motif:Daphne-73_HMa	67	72852	85.1512459676		Motif:EnSpm-7_HM	28	74476	89.204565871		Motif:Chapaev-1_AA	51	41760	75.2418875336		Motif:RLTR21	24	26145	83		Motif:BEL-30_CQ-LTR	29	67496	95.5627920147		Motif:Dada-tL_DR	4	4652	89.2898272553		Motif:Jockey-2_DEu	2	3084	91.7857142857		Motif:Helitron-5_CGi	3	1529	59.7732603597		Motif:Vingi-1_PMa	1	1050	71.4285714286
Motif:RLTR20C2_MM	7	10493	87.7487874226		Motif:Zisupton-1_DR	66	72918	85.228388424		Motif:Sm1	27	74503	89.2369054606		Motif:TE-2_XT	50	41810	75.3319760004		Motif:Polinton-1_PBa	24	26169	83.0761904762		Motif:MSAT_MG	28	67524	95.6024352258		Motif:CryptonV-2_DR	4	4656	89.3666026871		Motif:IS3EU-N1_CGi	2	3086	91.8452380952		Motif:Helitron-3_ZM	3	1532	59.890539484		Motif:Ves2_ML	1	1051	71.4965986395
Motif:RLTR17B_Mm	7	10500	87.8073256397		Motif:piggyBac-N5_DR	66	72984	85.3055308804		Motif:Polinton-1_HM	27	74530	89.2692450502		Motif:TRAS1	49	41859	75.420262698		Motif:P-1_LHu	24	26193	83.1523809524		Motif:DNA6-4_DR	28	67552	95.6420784369		Motif:Copia-75_Mad-LTR	4	4660	89.443378119		Motif:I-7B_AAe	2	3088	91.9047619048		Motif:hAT-N53_DR	3	1535	60.0078186083		Motif:Ves2B_ML	1	1052	71.5646258503
Motif:Mariner-29_AEc	7	10507	87.8658638568		Motif:Gypsy-14_RP-I	66	73050	85.3826733368		Motif:Kolobok-2_AP	27	74557	89.3015846399		Motif:EnSpm-N14_DR	49	41908	75.5085493955		Motif:DIRS-4_DR	24	26217	83.2285714286		Motif:DNA4-24_CGi	28	67580	95.681721648		Motif:Copia16-NVi_I-int	4	4664	89.5201535509		Motif:Helitron-N35_CGi	2	3090	91.9642857143		Motif:Gypsy-95_AA-I	3	1538	60.1250977326		Motif:U2	1	1053	71.6326530612
Motif:Mariner-17_AEc	7	10514	87.9244020739		Motif:Gypsy120-LTR_DR	66	73116	85.4598157932		Motif:Helitron-N1_PBa	27	74584	89.3339242295		Motif:P-27_HM	48	41956	75.5950343237		Motif:RMER12	23	26240	83.3015873016		Motif:CATCH2LTR_DR	28	67608	95.7213648591		Motif:CACTA-1_CapOwc	4	4668	89.5969289827		Motif:Helitron-N1_HSal	2	3092	92.0238095238		Motif:Gypsy-93_GM-I	3	1541	60.2423768569		Motif:Tx1-34_DR	1	1054	71.7006802721
Motif:ISL2EU-3_CFl	7	10521	87.982940291		Motif:Harbinger2-2_HM	65	73181	85.5357894245		Motif:EnSpm-N13_DR	27	74611	89.3662638192		Motif:Gypsy6-NVi_LTR	48	42004	75.6815192519		Motif:Polinton-1_XT	23	26263	83.3746031746		Motif:EnSpm1_SB	27	67635	95.7595922413		Motif:BEL-3-LTR_NVi	4	4672	89.6737044146		Motif:hAT-N36_DR	2	3094	92.0833333333		Motif:Gypsy-79_PAb-I	3	1544	60.3596559812		Motif:tRNA-Val-GTG	1	1055	71.768707483
Motif:Gypsy-53_SB-LTR	7	10528	88.0414785081		Motif:DNA-8-24_DR	65	73246	85.6117630558		Motif:Coprina_Pc2	27	74638	89.3986034088		Motif:SART-1_LHu	47	42051	75.7662024108		Motif:NERV5_MD_I-int	23	26286	83.4476190476		Motif:DNA-2-18_DR	27	67662	95.7978196234		Motif:BEL-23_CQ-I	4	4676	89.7504798464		Motif:hAT6-2_NV	2	3096	92.1428571429		Motif:Gypsy-77-I_ZM	3	1547	60.4769351056		Motif:tRNA-Trp-TGG	1	1056	71.8367346939
Motif:Ginger1-10_HM	7	10535	88.1000167252		Motif:EnSpm1_SB	63	73309	85.6853990369		Motif:TE-X-5_DR	26	74664	89.4297452359		Motif:P-29_HM	47	42098	75.8508855696		Motif:MdoERV2a-int	23	26309	83.5206349206		Motif:Tx1-1_CGi	26	67688	95.8346311766		Motif:TUB1	3	4679	89.8080614203		Motif:Harbinger-7_PGr	2	3098	92.2023809524		Motif:Gypsy-72_GM-I	3	1550	60.5942142299		Motif:tRNA-Thr-ACA	1	1057	71.9047619048
Motif:EnSpm-1_TA	7	10542	88.1585549423		Motif:MdoERV2a-int	62	73371	85.7578661929		Motif:SAT-23_DR	26	74690	89.460887063		Motif:L1-58_ACar	47	42145	75.9355687285		Motif:Helitron-1_DR	23	26332	83.5936507937		Motif:TDR8B	26	67714	95.8714427297		Motif:tRNA-Pro-CCY	3	4682	89.8656429942		Motif:Harbinger2-2_ES	2	3100	92.2619047619		Motif:Gypsy-70-I_ZM	3	1553	60.7114933542		Motif:tRNASerTCT_CB	1	1058	71.9727891156
Motif:EnSpm-12_OS	7	10549	88.2170931594		Motif:CryptonV-1_DR	62	73433	85.8303333489		Motif:L2_AC_11	26	74716	89.49202889		Motif:hAT-42_Lch	47	42192	76.0202518874		Motif:hAT-N68_DR	23	26355	83.6666666667		Motif:hAT-N36_DR	26	67740	95.9082542829		Motif:tRNAPheTTC_CB	3	4685	89.9232245681		Motif:Gypsy-80_CQ-I	2	3102	92.3214285714		Motif:Gypsy-6_RO-I	3	1556	60.8287724785		Motif:tRNA-Ser-TCG	1	1059	72.0408163265
Motif:DNA6-4_DR	7	10556	88.2756313765		Motif:RLTR32_Rn	61	73494	85.9016316798		Motif:Jockey-6_DK	26	74742	89.5231707171		Motif:Gypsy10-LTR_SP	47	42239	76.1049350462		Motif:hAT-82_HMa	23	26378	83.7396825397		Motif:HATN11_DR	26	67766	95.945065836		Motif:tRNA-Ile-ATT	3	4688	89.980806142		Motif:Gypsy-65_BG-I	2	3104	92.380952381		Motif:Gypsy61-I_AG	3	1559	60.9460516028		Motif:tRNA-SeC(e)-TGA	1	1060	72.1088435374
Motif:DNA-11_CGi	7	10563	88.3341695936		Motif:Mariner-19_HM	61	73555	85.9729300108		Motif:Gypsy-8N_PPa-LTR	26	74768	89.5543125442		Motif:DNA-2-32_DR	47	42286	76.1896182051		Motif:hAT-42_Lch	23	26401	83.8126984127		Motif:Daphne-21_SPu	26	67792	95.9818773892		Motif:tRNA-Asn-AAC	3	4691	90.0383877159		Motif:Gypsy-42_AMi-LTR	2	3106	92.4404761905		Motif:Gypsy-5_DSim-I	3	1562	61.0633307271		Motif:tRNA-Pro-CCY	1	1061	72.1768707483
Motif:DIRS-8_DR	7	10570	88.3927078107		Motif:Mariner-14_LCh	61	73616	86.0442283417		Motif:SR2	25	74793	89.5842566087		Motif:Dada-U6_DR	46	42332	76.2724995946		Motif:hAT-42_HM	23	26424	83.8857142857		Motif:L1-56_DR	25	67817	96.0172731134		Motif:tRNA-Arg-CGY_	3	4694	90.0959692898		Motif:Gypsy-38_NVi-LTR	2	3108	92.5		Motif:Gypsy-594_AA-I	3	1565	61.1806098514		Motif:tRNA-Pro-CCG	1	1062	72.2448979592
Motif:tRNAPro_CB	6	10576	88.4428834253		Motif:LTR24_Sar	61	73677	86.1155266726		Motif:hAT-N131_DR	25	74818	89.6142006731		Motif:HAT1_DR	45	42377	76.3535792148		Motif:Gypsy6-NVi_LTR	23	26447	83.9587301587		Motif:Gypsy-199_ZM-I	25	67842	96.0526688376		Motif:tRNAAlaAGC_CB	3	4697	90.1535508637		Motif:Gypsy-23_PSo-I	2	3110	92.5595238095		Motif:Gypsy-49_CQ-I	3	1568	61.2978889758		Motif:tRNAPro_CB	1	1063	72.3129251701
Motif:tRNAIleATT_CB	6	10582	88.49305904		Motif:DNA2-1_DR	61	73738	86.1868250035		Motif:Gypsy-15_LBS-I	25	74843	89.6441447376		Motif:DINOLT1	45	42422	76.434658835		Motif:EnSpm-5_HM	23	26470	84.0317460317		Motif:DNA2-10_DR	25	67867	96.0880645618		Motif:TE-X-5_DR	3	4700	90.2111324376		Motif:Gypsy-199_ZM-I	2	3112	92.619047619		Motif:Gypsy-42_PAb-I	3	1571	61.4151681001		Motif:tRNA-Phe-TTY	1	1064	72.380952381
Motif:RLTR21	6	10588	88.5432346546		Motif:MuDR-8_VV	60	73798	86.2569545093		Motif:Gypsy-12_CSa-LTR	25	74868	89.6740888021		Motif:SSU-rRNA_Sme	44	42466	76.5139366858		Motif:DNA8-21_DR	23	26493	84.1047619048		Motif:DIRS-4N3_DR	25	67892	96.123460286		Motif:TE-5B_CGi	3	4703	90.2687140115		Motif:Gypsy-139_AA-I	2	3114	92.6785714286		Motif:Gypsy-39_GM-I	3	1574	61.5324472244		Motif:tRNA-Lys-AAA	1	1065	72.4489795918
Motif:PRIMA4-int	6	10594	88.5934102693		Motif:Gypsy-54_GM-LTR	60	73858	86.3270840151		Motif:EnSpm-3_TA	25	74893	89.7040328666		Motif:HAT-10_Mad	44	42510	76.5932145367		Motif:tRNA-Pro-CCY	22	26515	84.1746031746		Motif:Homo10	24	67916	96.1574401812		Motif:RLTR20C1_MM	3	4706	90.3262955854		Motif:Gypsy-10_CCO-I	2	3116	92.7380952381		Motif:Gypsy38-I_DR	3	1577	61.6497263487		Motif:tRNA-Leu-CTY	1	1066	72.5170068027
Motif:Polinton-5_NVi	6	10600	88.6435858839		Motif:DNA-2-24B_DR	59	73917	86.3960446959		Motif:HELITRON9D_CB	24	74917	89.7327791685		Motif:CR1-2_CQ	44	42554	76.6724923875		Motif:TRAS1	22	26537	84.2444444444		Motif:HAL1-3A_ME	24	67940	96.1914200765		Motif:R1_DYa	3	4709	90.3838771593		Motif:EnSpm-9_OS	2	3118	92.7976190476		Motif:Gypsy-38_BD-I	3	1580	61.767005473		Motif:tRNALeuCTT_CB	1	1067	72.5850340136
Motif:LTR-12D_Crp	6	10606	88.6937614986		Motif:L1-67_DR	58	73975	86.4638365515		Motif:Gypsy-23_PSo-I	24	74941	89.7615254704		Motif:CR1-15_HM	44	42598	76.7517702384		Motif:Sola2-1_HM	22	26559	84.3142857143		Motif:Gypsy-80-I_ZM	24	67964	96.2253999717		Motif:Polinton-2_HM	3	4712	90.4414587332		Motif:ENSPM-6_DR	2	3120	92.8571428571		Motif:Gypsy-35_Adi-I	3	1583	61.8842845973		Motif:tRNAIleATT_CB	1	1068	72.6530612245
Motif:Kolobok-2_XT	6	10612	88.7439371132		Motif:EnSpm-N17_DR	58	74033	86.5316284071		Motif:hAT-2N1_TC	23	74964	89.7890740097		Motif:RLTR31D_MM	43	42641	76.8292463199		Motif:hAT-N5_ACar	22	26581	84.3841269841		Motif:ERV24_MD_I-int	24	67988	96.2593798669		Motif:Polinton-1_LCh	3	4715	90.4990403071		Motif:EnSpm2_PTr	2	3122	92.9166666667		Motif:Gypsy-34_NVi-I	3	1586	62.0015637217		Motif:tRNA-Gly-GGA	1	1069	72.7210884354
Motif:Jockey-3_DGri	6	10618	88.7941127279		Motif:hAT-N145_DR	56	74089	86.5970826126		Motif:Gypsy-2_DFa-I	23	74987	89.8166225491		Motif:Gypsy-120_SB-I	43	42684	76.9067224014		Motif:Academ-1_HM	22	26603	84.453968254		Motif:DNA6-9_CGi	24	68012	96.2933597621		Motif:MERMITE-18	3	4718	90.556621881		Motif:DNA-TA-4_DR	2	3124	92.9761904762		Motif:Gypsy-32-I_DR	3	1589	62.118842846		Motif:tRNA-Gln-CAA	1	1070	72.7891156463
Motif:Helitron-N2_DR	6	10624	88.8442883425		Motif:SFV1-15_AMi-I	55	74144	86.6613679929		Motif:EnSpm-4_HM	23	75010	89.8441710884		Motif:Ginger1-6_HM	43	42727	76.9841984829		Motif:TSESSEBEII	21	26624	84.5206349206		Motif:Dada-U6_SS	24	68036	96.3273396574		Motif:Mariner-4_LHu	3	4721	90.6142034549		Motif:DNA-N4_DR	2	3126	93.0357142857		Motif:Gypsy-2_PSH-I	3	1592	62.2361219703		Motif:tRNA-Arg-AGG	1	1071	72.8571428571
Motif:hAT-N36_DR	6	10630	88.8944639572		Motif:Harbinger-N16_DR	55	74199	86.7256533732		Motif:EnSpm-36_SBi	23	75033	89.8717196277		Motif:EnSpm-1_HV	43	42770	77.0616745644		Motif:tRNA-1_DRe	21	26645	84.5873015873		Motif:Mariner-38B_SIn	23	68059	96.3599037236		Motif:Mariner-39_HM	3	4724	90.6717850288		Motif:DNA8-10_CGi	2	3128	93.0952380952		Motif:Gypsy-2_Mad-I	3	1595	62.3534010946		Motif:TPA5_LTR	1	1072	72.925170068
Motif:HAT-4_Mad	6	10636	88.9446395718		Motif:EnSpm-5_HV	55	74254	86.7899387536		Motif:EnSpm-22_HMa	23	75056	89.8992681671		Motif:MuDR-1_NV	42	42812	77.1373488766		Motif:P-13_HM	21	26666	84.653968254		Motif:LTR2C_Opr	23	68082	96.3924677899		Motif:Mariner-29_AEc	3	4727	90.7293666027		Motif:DNA6-9_CGi	2	3130	93.1547619048		Motif:Gypsy-26-I_DR	3	1598	62.4706802189		Motif:TguERVK4_I-int	1	1073	72.9931972789
Motif:Gypsy118-LTR_DR	6	10642	88.9948151865		Motif:DNA8-21_DR	55	74309	86.8542241339		Motif:CR1-13_NV	23	75079	89.9268167064		Motif:L1-82_DR	42	42854	77.2130231888		Motif:MuDR1_HV	21	26687	84.7206349206		Motif:Harbinger-5_DR	23	68105	96.4250318562		Motif:Mariner-19_HSal	3	4730	90.7869481766		Motif:DNA3-1_CGi	2	3132	93.2142857143		Motif:Gypsy-25_BRa-I	3	1601	62.5879593432		Motif:TDR13	1	1074	73.0612244898
Motif:Ginger1-N1_DR	6	10648	89.0449908011		Motif:DNA-2-3_DR	55	74364	86.9185095142		Motif:Sola3-1_AA	22	75101	89.9531674831		Motif:hAT-N21_DR	42	42896	77.2886975009		Motif:L1-47B_ACar	21	26708	84.7873015873		Motif:MER4-int	22	68127	96.4561800934		Motif:LTR2C_Opr	3	4733	90.8445297505		Motif:DNA2-7_CGi	2	3134	93.2738095238		Motif:Gypsy-234_AA-I	3	1604	62.7052384676		Motif:TC1L_SS	1	1075	73.1292517007
Motif:ENSPM-6_ZM	6	10654	89.0951664158		Motif:Gypsy-6_AEc-LTR	54	74418	86.9816260695		Motif:L2_AC_14	22	75123	89.9795182599		Motif:Gypsy98-LTR_Dr	42	42938	77.3643718131		Motif:hATm-27_HM	21	26729	84.853968254		Motif:hAT6-2_SP	22	68149	96.4873283307		Motif:LOOPERN2_DR	3	4736	90.9021113244		Motif:DIRS-8B_DR	2	3136	93.3333333333		Motif:Gypsy-226_AA-I	3	1607	62.8225175919		Motif:SSU-rRNA_Sme	1	1076	73.1972789116
Motif:EnSpm-3_HV	6	10660	89.1453420304		Motif:CASAT_HD	54	74472	87.0447426247		Motif:DNA6-1_CQ	22	75145	90.0058690366		Motif:Chapaev-6_HM	42	42980	77.4400461253		Motif:hAT-80_HM	21	26750	84.9206349206		Motif:Gypsy-69_PM-I	22	68171	96.518476568		Motif:L2B-4B_AAe	3	4739	90.9596928983		Motif:DIRS-15_DR	2	3138	93.3928571429		Motif:Gypsy21-I_SP	3	1610	62.9397967162		Motif:Sola1-1_Smoe	1	1077	73.2653061224
Motif:DNA8-5_DR	6	10666	89.1955176451		Motif:hATm-47_HM	53	74525	87.1066903549		Motif:DGI_SP	22	75167	90.0322198134		Motif:ISL2EU-8_CGi	41	43021	77.5139186681		Motif:Harbinger-8_DR	21	26771	84.9873015873		Motif:EnSpm-1_HV	22	68193	96.5496248053		Motif:L1-N3_FV	3	4742	91.0172744722		Motif:Daphne-21_SPu	2	3140	93.4523809524		Motif:Gypsy-21_DWil-I	3	1613	63.0570758405		Motif:Sola1-1_MonBre	1	1078	73.3333333333
Motif:DIRS-4_DR	6	10672	89.2456932597		Motif:EnSpm2_SB	53	74578	87.168638085		Motif:CR1-2_CQ	22	75189	90.0585705901		Motif:Chapaev-3_HM	41	43062	77.587791211		Motif:DNA8-5_DR	21	26792	85.053968254		Motif:SSU-rRNA_Sce	21	68214	96.5793572136		Motif:Kolobok-N1_AEc	3	4745	91.0748560461		Motif:Dada-tY_PMar	2	3142	93.5119047619		Motif:Gypsy-17_Ano-I	3	1616	63.1743549648		Motif:Sola1-1_FraCyl	1	1079	73.4013605442
Motif:Dada-U1A_DR	6	10678	89.2958688744		Motif:RTAg4	52	74630	87.22941699		Motif:Polinton-4_PBa	21	75210	90.0837236043		Motif:TUB1	39	43101	77.6580602151		Motif:Daphne-73_HMa	21	26813	85.1206349206		Motif:Helitron-9_CGi	21	68235	96.609089622		Motif:Helitron-N3_DR	3	4748	91.13243762		Motif:CryptonV-2_DR	2	3144	93.5714285714		Motif:Gypsy16-PTR_I-int	3	1619	63.2916340891		Motif:SINE-3B_CQ	1	1080	73.4693877551
Motif:Academ-4_SP	6	10684	89.346044489		Motif:Ginger1-N1_DR	51	74681	87.28902707		Motif:hAT-2_DR	21	75231	90.1088766185		Motif:TSESSEBEII	39	43140	77.7283292193		Motif:Copia-23_NVi-I	21	26834	85.1873015873		Motif:hAT-N71_DR	21	68256	96.6388220303		Motif:Helitron-N1_HSal	3	4751	91.1900191939		Motif:Copia-1_ST-LTR	2	3146	93.630952381		Motif:Gypsy134-I_DR	3	1622	63.4089132134		Motif:SINE2-4a1_SP	1	1081	73.537414966
Motif:Tx1-1_CGi	5	10689	89.3878575013		Motif:Harbinger-1_XT	50	74731	87.3474683248		Motif:Gypsy-1_AC-I	21	75252	90.1340296326		Motif:REP-2_PSt	39	43179	77.7985982235		Motif:CeRep54	21	26855	85.253968254		Motif:Gypsy-6_DEu-I	21	68277	96.6685544386		Motif:HAT1_DR	3	4754	91.2476007678		Motif:BEL-50_DRe-LTR	2	3148	93.6904761905		Motif:Gypsy-131_GM-I	3	1625	63.5261923378		Motif:SINE2-1_Pca	1	1082	73.6054421769
Motif:Transib-2_HM	5	10694	89.4296705135		Motif:Dada-tA_DR	50	74781	87.4059095797		Motif:Nimb-11_DR	20	75272	90.1579848842		Motif:Mariner-N3_DR	39	43218	77.8688672276		Motif:SLIDE	20	26875	85.3174603175		Motif:SSU-rRNA_Sme	20	68297	96.696871018		Motif:Gypsy-62_BG-LTR	3	4757	91.3051823417		Motif:ATENSPM5	2	3150	93.75		Motif:GLT2_SM	3	1628	63.6434714621		Motif:SINE2-1_CM	1	1083	73.6734693878
Motif:RMER12C	5	10699	89.4714835257		Motif:Kolobok-1_DR	49	74830	87.4631820094		Motif:Mariner-39_HM	20	75292	90.1819401358		Motif:Mariner-31_HM	39	43257	77.9391362318		Motif:Proto1-2_NG	20	26895	85.380952381		Motif:hAT-208_Ami	20	68317	96.7251875973		Motif:Gypsy-35_CGi-I	3	4760	91.3627639155		Motif:Academ-1_SK	2	3152	93.8095238095		Motif:ERVB4_2-I_MM	3	1631	63.7607505864		Motif:SFV1-6B_Crp-LTR	1	1084	73.7414965986
Motif:Polinton-9_NVi	5	10704	89.5132965379		Motif:hAT-N39_DR	49	74879	87.5204544392		Motif:L2_AC_6	20	75312	90.2058953874		Motif:IS3EU-N1_CGi	39	43296	78.0094052359		Motif:Mariner-19_HM	20	26915	85.4444444444		Motif:Gypsy-33-LTR_DR	20	68337	96.7535041767		Motif:Gypsy18-I_CR	3	4763	91.4203454894		Motif:Zisupton-1_DR	1	3153	93.8392857143		Motif:ERV-1_CPB-I	3	1634	63.8780297107		Motif:SFV1-17_AMi-LTR	1	1085	73.8095238095
Motif:Polinton-1_SP	5	10709	89.5551095501		Motif:hAT-68_HM	49	74928	87.577726869		Motif:HATN16_DR	20	75332	90.229850639		Motif:hATw-1_SP	39	43335	78.0796742401		Motif:L1-56_DR	20	26935	85.5079365079		Motif:Gypsy14-LTR_Dpse	20	68357	96.7818207561		Motif:Gypsy-15_LBS-I	3	4766	91.4779270633		Motif:Waldo-3_AAe	1	3154	93.869047619		Motif:EnSpm1_TM	3	1637	63.995308835		Motif:SAT-23_DR	1	1086	73.8775510204
Motif:piggyBac-21_SM	5	10714	89.5969225623		Motif:ERV-2B_Crp-LTR	49	74977	87.6349992987		Motif:DIRS-4N2_DR	20	75352	90.2538058906		Motif:Harbinger2-2_ES	39	43374	78.1499432443		Motif:hATm-54_HM	20	26955	85.5714285714		Motif:DNA7-N1_DR	20	68377	96.8101373354		Motif:Gypsy152B-LTR_DR	3	4769	91.5355086372		Motif:Waldo-2_AAe	1	3155	93.8988095238		Motif:EnSpm1_SB	3	1640	64.1125879593		Motif:SAT-1_SK	1	1087	73.9455782313
Motif:P-1_DR	5	10719	89.6387355745		Motif:Crack-2_SP	49	75026	87.6922717285		Motif:Homo10	19	75371	90.2765633796		Motif:Gypsy-63_CQ-I	39	43413	78.2202122484		Motif:Dada-tA_DR	20	26975	85.6349206349		Motif:TE-5_CGi	19	68396	96.8370380858		Motif:Gypsy120-LTR_DR	3	4772	91.5930902111		Motif:VLINE3_VV	1	3156	93.9285714286		Motif:DNA8-10_CGi	3	1643	64.2298670837		Motif:SAT-1_AMi	1	1088	74.0136054422
Motif:MuDR-1_NV	5	10724	89.6805485867		Motif:EnSpm8_SB	48	75074	87.7483753331		Motif:Helitron-1_DR	19	75390	90.2993208686		Motif:EnSpm-16_SBi	39	43452	78.2904812526		Motif:P-26_HM	19	26994	85.6952380952		Motif:R1_DYa	19	68415	96.8639388362		Motif:Gypsy-116-LTR_DR	3	4775	91.650671785		Motif:VIHAT3	1	3157	93.9583333333		Motif:DNA6-1_SP	3	1646	64.347146208		Motif:SAT-17_DR	1	1089	74.0816326531
Motif:MuDR1_HV	5	10729	89.7223615989		Motif:DNA-1-8_DR	48	75122	87.8044789378		Motif:Copia-50_BG-I	19	75409	90.3220783576		Motif:DNA-2-3_DR	39	43491	78.3607502568		Motif:L2_AC_2	19	27013	85.7555555556		Motif:DNA2-10_CGi	19	68434	96.8908395866		Motif:Ginger1-N1_DR	3	4778	91.7082533589		Motif:Tx1-4_DR	1	3158	93.9880952381		Motif:DNA3-4_CGi	3	1649	64.4644253323		Motif:Sagan-1_AAn	1	1090	74.1496598639
Motif:LatiHarb1-N1	5	10734	89.7641746111		Motif:CR1-52_BF	48	75170	87.8605825424		Motif:Academ-1_SK	19	75428	90.3448358466		Motif:P-1_DR	38	43529	78.4292174916		Motif:Harbinger-N16_DR	19	27032	85.8158730159		Motif:Academ-1_SK	19	68453	96.917740337		Motif:ERV-3_AMi-LTR	3	4781	91.7658349328		Motif:TUB1	1	3159	94.0178571429		Motif:DNA2-5_DR	3	1652	64.5817044566		Motif:SACI-6	1	1091	74.2176870748
Motif:L1-71_ACar	5	10739	89.8059876233		Motif:ERV38_MD-int	47	75217	87.915517322		Motif:Polinton-2_PBa	18	75446	90.3663955731		Motif:MINIME_DN	38	43567	78.4976847264		Motif:Harbinger2-2_HM	19	27051	85.8761904762		Motif:Mariner-19_HSal	18	68471	96.9432252584		Motif:ERV38_MD-int	3	4784	91.8234165067		Motif:TRAS3_BM	1	3160	94.0476190476		Motif:DIRS-21_ACar	3	1655	64.6989835809		Motif:RTEX-2_DR	1	1092	74.2857142857
Motif:L1-47B_ACar	5	10744	89.8478006356		Motif:LatiHarb1-2	46	75263	87.9692832765		Motif:MuDR-11B_GM	18	75464	90.3879552995		Motif:ISL2EU-3N1_CFl	38	43605	78.5661519612		Motif:Gypsy-54_GM-LTR	19	27070	85.9365079365		Motif:LTR-12D_Crp	18	68489	96.9687101798		Motif:ERV-2B_Crp-LTR	3	4787	91.8809980806		Motif:Transib-1_DRh	1	3161	94.0773809524		Motif:DGLT-P_DD	3	1658	64.8162627052		Motif:RTE-2_DBp	1	1093	74.3537414966
Motif:Kolobok-N9_DR	5	10749	89.8896136478		Motif:STOWAWAY50_OS	45	75308	88.0218804058		Motif:L1-48_DR	18	75482	90.4095150259		Motif:Gypsy4-SM_I-int	38	43643	78.6346191961		Motif:EnSpm-N17_DR	19	27089	85.9968253968		Motif:hAT-N36C_DR	18	68507	96.9941951012		Motif:EnSpm2_TM	3	4790	91.9385796545		Motif:TE7-1_FV	1	3162	94.1071428571		Motif:Dada-tL_DR	3	1661	64.9335418296		Motif:RTE-1_PM	1	1094	74.4217687075
Motif:Helitron-N46_CGi	5	10754	89.93142666		Motif:Ngaro1_DR	45	75353	88.0744775352		Motif:Kiri-4_AAe	18	75500	90.4310747524		Motif:EnSpm-7_DR	38	43681	78.7030864309		Motif:EnSpm-8_DR	19	27108	86.0571428571		Motif:hAT-N36B_DR	18	68525	97.0196800227		Motif:DNA9-3_DR	3	4793	91.9961612284		Motif:TC1_FR5	1	3163	94.1369047619		Motif:CryptonF-1_NF	3	1664	65.0508209539		Motif:RMU3_OS	1	1095	74.4897959184
Motif:Helitron-4_DR	5	10759	89.9732396722		Motif:Daphne-16_HMa	45	75398	88.1270746645		Motif:hAT6-2N1_SP	18	75518	90.4526344788		Motif:DNA8-2C_CGi	38	43719	78.7715536657		Motif:EnSpm-1_BF	19	27127	86.1174603175		Motif:Gypsy15-I_CR	18	68543	97.0451649441		Motif:DNA-8-4_DR	3	4796	92.0537428023		Motif:Tad1-10_PGr	1	3164	94.1666666667		Motif:CR1-48_HM	3	1667	65.1681000782		Motif:RMER17D	1	1096	74.5578231293
Motif:hAT-N71_DR	5	10764	90.0150526844		Motif:SPMLIKE	44	75442	88.1785029688		Motif:Ginger1-10_HM	18	75536	90.4741942052		Motif:Z-REP	37	43756	78.8382191312		Motif:DNA-8-29_DR	19	27146	86.1777777778		Motif:Ginger1-2_DR	18	68561	97.0706498655		Motif:DNA8-12_CGi	3	4799	92.1113243762		Motif:SAT-23_DR	1	3165	94.1964285714		Motif:CR1-33_BF	3	1670	65.2853792025		Motif:RLG_scReina_1_1-I	1	1097	74.6258503401
Motif:hAT-N13_AMi	5	10769	90.0568656966		Motif:SAT-12_DR	44	75486	88.2299312731		Motif:EnSpm-2_TD	18	75554	90.4957539317		Motif:RTEX-4_CGi	37	43793	78.9048845967		Motif:DNA-2-3_DR	19	27165	86.2380952381		Motif:Gypsy-9_DPu-I	17	68578	97.0947189579		Motif:DNA4-42B_CGi	3	4802	92.1689059501		Motif:Sat-1_TSy	1	3166	94.2261904762		Motif:CR1-2_CQ	3	1673	65.4026583268		Motif:Rex1-3_FR	1	1098	74.693877551
Motif:hAT-N107_DR	5	10774	90.0986787088		Motif:P-26_HM	44	75530	88.2813595774		Motif:DNA-5-2B_DR	18	75572	90.5173136581		Motif:Mariner-62_HSal	37	43830	78.9715500622		Motif:Copia13-NVi_I-int	19	27184	86.2984126984		Motif:DNA-1-8_DR	17	68595	97.1187880504		Motif:DNA-2-32_DR	3	4805	92.226487524		Motif:RTE-5_CPB	1	3167	94.255952381		Motif:Copia17-NVi_I-int	3	1676	65.5199374511		Motif:REX1-2_DR	1	1099	74.7619047619
Motif:hAT-2_HM	5	10779	90.140491721		Motif:Sm1	43	75573	88.3316190565		Motif:Copia-89_VV-I	18	75590	90.5388733845		Motif:Harbinger2N_TP	37	43867	79.0382155276		Motif:Chapaev-3B_HM	19	27203	86.3587301587		Motif:Sola3-1_EmiHux	16	68611	97.1414413139		Motif:DIRS-4_DR	3	4808	92.2840690979		Motif:RNLTR2d	1	3168	94.2857142857		Motif:CEREBA_HV-int	3	1679	65.6372165754		Motif:RETROSAT5_LTR	1	1100	74.8299319728
Motif:hAT-1N1_AC	5	10784	90.1823047332		Motif:ROMANI1_I-int	43	75616	88.3818785357		Motif:REP-2_PSt	17	75607	90.5592353484		Motif:Ambal-3N1_FCy	37	43904	79.1048809931		Motif:Zisupton-1_DR	18	27221	86.4158730159		Motif:HelitronN-1_DPe	16	68627	97.1640945774		Motif:Dada-tY_PMar	3	4811	92.3416506718		Motif:RLTR32_Rn	1	3169	94.3154761905		Motif:CACTA-1_Roryzae	3	1682	65.7544956998		Motif:Retrofit3_I-int	1	1101	74.8979591837
Motif:HAT1_DR	5	10789	90.2241177454		Motif:Rex1-31_DRe	43	75659	88.4321380149		Motif:MuDR-4_GM	17	75624	90.5795973122		Motif:SSU-rRNA_Sce	36	43940	79.1697446893		Motif:TguLTRK7g	18	27239	86.473015873		Motif:L1-82_DR	15	68642	97.1853320119		Motif:CSINE2	3	4814	92.3992322457		Motif:RLTR31D_MM	1	3170	94.3452380952		Motif:BEL1-I_SM	3	1685	65.8717748241		Motif:RETRO2_I-int	1	1102	74.9659863946
Motif:Harbinger-5_DR	5	10794	90.2659307577		Motif:EnSpm-10_HM	43	75702	88.482397494		Motif:MuDr-1_HV	17	75641	90.5999592761		Motif:Helitron-1_HM	36	43976	79.2346083854		Motif:L1-1_STu	18	27257	86.5301587302		Motif:hAT-N35B_DR	15	68657	97.2065694464		Motif:Copia-58_BG-I	3	4817	92.4568138196		Motif:RLTR20C1_MM	1	3171	94.375		Motif:XILON1_ZM-int	2	1687	65.949960907		Motif:REP-1_ZM	1	1103	75.0340136054
Motif:Gypsy98-LTR_Dr	5	10799	90.3077437699		Motif:DNA2-7_DR	43	75745	88.5326569732		Motif:Kolobok-4_DR	17	75658	90.6203212399		Motif:hAT-N22_DR	36	44012	79.2994720816		Motif:Helitron-N3_DR	18	27275	86.5873015873		Motif:Gypsy-82_CQ-I	15	68672	97.2278068809		Motif:Copia-4_CQ-I	3	4820	92.5143953935		Motif:Rex1-31_DRe	1	3172	94.4047619048		Motif:U2	2	1689	66.0281469898		Motif:Rehavkus-2_NVi	1	1104	75.1020408163
Motif:Gypsy6-NVi_LTR	5	10804	90.3495567821		Motif:MuDR-4_GM	42	75787	88.5817476273		Motif:IMPB_01	17	75675	90.6406832038		Motif:hAT6-2_SP	36	44048	79.3643357777		Motif:CryptonV-1_DR	18	27293	86.6444444444		Motif:Copia-13_BD-I	15	68687	97.2490443154		Motif:Copia3-I_CR	3	4823	92.5719769674		Motif:Rex1-26_DRe	1	3173	94.4345238095		Motif:TUB1	2	1691	66.1063330727		Motif:R7Ag2	1	1105	75.1700680272
Motif:Gypsy-14_DAn-I	5	10809	90.3913697943		Motif:L1-2_SMo	42	75829	88.6308382814		Motif:HELITRON7_OS	17	75692	90.6610451676		Motif:EnSpm-14_HM	36	44084	79.4291994739		Motif:Copia-1_DGri-I	18	27311	86.7015873016		Motif:Polinton-2_NV	14	68701	97.268865921		Motif:Copia-2_GA-I	3	4826	92.6295585413		Motif:RETROFIT_I-int	1	3174	94.4642857143		Motif:tRNA-Val-GTG	2	1693	66.1845191556		Motif:R7Ag1	1	1106	75.2380952381
Motif:Gypsy-120_SB-I	5	10814	90.4331828065		Motif:EnSpm-5_DR	42	75871	88.6799289354		Motif:hAT-N10_ACar	17	75709	90.6814071315		Motif:DNA6-9_CGi	36	44120	79.49406317		Motif:ACROBAT1	18	27329	86.7587301587		Motif:Helitron-N3_DT	14	68715	97.2886875265		Motif:Copia-23_PX-I	3	4829	92.6871401152		Motif:Polinton-7_NVi	1	3175	94.494047619		Motif:tRNA-Thr-ACY	2	1695	66.2627052385		Motif:R2_DPe	1	1107	75.306122449
Motif:Gypsy-116-LTR_DR	5	10819	90.4749958187		Motif:Z-REP	41	75912	88.7278507644		Motif:Gypsy-50_GA-LTR	17	75726	90.7017690953		Motif:DNA4-6_CGi	36	44156	79.5589268662		Motif:Polinton-2_DR	17	27346	86.8126984127		Motif:HATN16_DR	14	68729	97.3085091321		Motif:CACTA-Q	3	4832	92.7447216891		Motif:Polinton-3_PBa	1	3176	94.5238095238		Motif:tRNAAsnGTT_CB	2	1697	66.3408913213		Motif:R1_DPs	1	1108	75.3741496599
Motif:Gypsy-10_PBa-LTR	5	10824	90.5168088309		Motif:RLTR20A4	41	75953	88.7757725934		Motif:Gypsy-22_DWil-I	17	75743	90.7221310592		Motif:DNA4-24_CGi	36	44192	79.6237905623		Motif:hATN-4_ACar	17	27363	86.8666666667		Motif:hAT-4B_AMi	14	68743	97.3283307376		Motif:Tx1-5_PM	2	4834	92.783109405		Motif:Polinton-3_NVi	1	3177	94.5535714286		Motif:tRNA-Ala-GCG	2	1699	66.4190774042		Motif:R1_DM	1	1109	75.4421768707
Motif:Ginger1-2_DR	5	10829	90.5586218431		Motif:Gypsy-17_PBa-I	41	75994	88.8236944224		Motif:Gypsy-21_DY-I	17	75760	90.742493023		Motif:CryptonV-3_DR	36	44228	79.6886542585		Motif:hAT6-2_NV	17	27380	86.9206349206		Motif:Gypsy-31_DEl-I	14	68757	97.3481523432		Motif:Tx1-32_DR	2	4836	92.8214971209		Motif:Polinton-1_DR	1	3178	94.5833333333		Motif:TRE3D	2	1701	66.4972634871		Motif:R1-6_DPer	1	1110	75.5102040816
Motif:FUGUREP2	5	10834	90.6004348553		Motif:EnSpm-8_HM	41	76035	88.8716162513		Motif:EnSpm-30_SBi	17	75777	90.7628549869		Motif:CR1-80_HM	36	44264	79.7535179546		Motif:hAT-32_HM	17	27397	86.9746031746		Motif:SSU-rRNA_Ath	13	68770	97.3665581198		Motif:Tx1-11_CGi	2	4838	92.8598848369		Motif:Polinton-1_DGr	1	3179	94.6130952381		Motif:TguSINE1	2	1703	66.57544957		Motif:R1-1_DT	1	1111	75.5782312925
Motif:EnSpm-6N1_DR	5	10839	90.6422478675		Motif:EnSpm-19_HMa	41	76076	88.9195380803		Motif:EnSpm-1_NVi	17	75794	90.7832169507		Motif:Chapaev-3A_HM	36	44300	79.8183816508		Motif:Gypsy-40_Mad-I	17	27414	87.0285714286		Motif:Pigibakku	13	68783	97.3849638964		Motif:tRNA-Thr-ACG	2	4840	92.8982725528		Motif:PiggyBac-1_EmiHux	1	3180	94.6428571429		Motif:SZ-54_int-int	2	1705	66.6536356529		Motif:R1-1_DBp	1	1112	75.6462585034
Motif:EnSpm-43_SBi	5	10844	90.6840608797		Motif:DNA-N4_DR	41	76117	88.9674599093		Motif:EnSpm-1_HM	17	75811	90.8035789146		Motif:Transib-2_HM	35	44335	79.8814435776		Motif:DNA9-6_DR	17	27431	87.0825396825		Motif:MdoLTR2-int	13	68796	97.4033696729		Motif:tRNASerTCT_CB	2	4842	92.9366602687		Motif:Penelope-13_HM	1	3181	94.6726190476		Motif:STALKER4_I-int	2	1707	66.7318217357		Motif:Poseidon-2B_PM	1	1113	75.7142857143
Motif:EnSpm-16_SBi	5	10849	90.725873892		Motif:RNLTR2d	40	76157	89.0142129132		Motif:DNA-X-16_DR	17	75828	90.8239408784		Motif:Sola2-1_HM	35	44370	79.9445055044		Motif:BEL-21_DWil-I	17	27448	87.1365079365		Motif:Mariner-N8_SIn	13	68809	97.4217754495		Motif:tRNA-Met-i	2	4844	92.9750479846		Motif:OSTE15	1	3182	94.7023809524		Motif:SSU-rRNA_Sme	2	1709	66.8100078186		Motif:Polinton-5_SP	1	1114	75.7823129252
Motif:EnSpm-10_DR	5	10854	90.7676869042		Motif:Ogre-PT3_I-int	40	76197	89.0609659171		Motif:DNA-12_CGi	17	75845	90.8443028423		Motif:ROO_I-int	35	44405	80.0075674312		Motif:Tx1-1_CGi	16	27464	87.1873015873		Motif:L1-11_DR	13	68822	97.4401812261		Motif:tRNA-Arg-CGA	2	4846	93.0134357006		Motif:OSTE1	1	3183	94.7321428571		Motif:SSU-rRNA_Lvi	2	1711	66.8881939015		Motif:Polinton-5_NV	1	1115	75.8503401361
Motif:DNA-2-18_DR	5	10859	90.8094999164		Motif:Ag-Jock-1	40	76237	89.1077189209		Motif:CR1-20_CQ	17	75862	90.8646648061		Motif:Helitron-N2_DR	35	44440	80.070629358		Motif:tRNAPheTTC_CB	16	27480	87.2380952381		Motif:DNA9-3_DR	13	68835	97.4585870027		Motif:tRNA-Ala-GCG	2	4848	93.0518234165		Motif:OSCopia2_I-int	1	3184	94.7619047619		Motif:Sola1-1_FraCyl	2	1713	66.9663799844		Motif:Polinton-2_HM	1	1116	75.9183673469
Motif:DNA-1-8_DR	5	10864	90.8513129286		Motif:TRAS3_BM	39	76276	89.1533030997		Motif:tRNASerTCT_CB	16	75878	90.8838290074		Motif:Harbinger-1_DR	35	44475	80.1336912848		Motif:Perere-9	16	27496	87.2888888889		Motif:DNA8-25_DR	13	68848	97.4769927793		Motif:tRNA-2_DRe	2	4850	93.0902111324		Motif:OK	1	3185	94.7916666667		Motif:RMER12C	2	1715	67.0445660672		Motif:Polinton-1_PI	1	1117	75.9863945578
Motif:DNA-1-2_DR	5	10869	90.8931259408		Motif:Polinton-1_PBa	39	76315	89.1988872785		Motif:MuDr-1x_SP	16	75894	90.9029932087		Motif:Gypsy-4_PPP-I	35	44510	80.1967532117		Motif:P-1_DBp	16	27512	87.3396825397		Motif:Copia-4_SCH-I	13	68861	97.4953985559		Motif:TRAS1	2	4852	93.1285988484		Motif:NUSIF1_TM	1	3186	94.8214285714		Motif:RLTR31D_MM	2	1717	67.1227521501		Motif:Polinton-1_PBa	1	1118	76.0544217687
Motif:Dada-U6_DR	5	10874	90.934938953		Motif:CR1-35_HM	39	76354	89.2444714573		Motif:MinoAg1	16	75910	90.92215741		Motif:DNA3-10_CGi	35	44545	80.2598151385		Motif:Kolobok-3_DR	16	27528	87.3904761905		Motif:RLTR31D_MM	12	68873	97.5123885035		Motif:SSU-rRNA_Sme	2	4854	93.1669865643		Motif:Novosib-6_CR	1	3187	94.8511904762		Motif:RLG_scDEL_1_6-I	2	1719	67.200938233		Motif:Polinton-1_DAn	1	1119	76.1224489796
Motif:CVE	5	10879	90.9767519652		Motif:P-1_DBp	37	76391	89.2877179859		Motif:LSU-rRNA_Mfr	16	75926	90.9413216112		Motif:DNA2-7_CGi	35	44580	80.3228770653		Motif:hAT-4_PBa	16	27544	87.4412698413		Motif:R7Ag2	12	68885	97.5293784511		Motif:SSU-rRNA_Sce	2	4856	93.2053742802		Motif:Novosib-1_EmiHux	1	3188	94.880952381		Motif:RETROSAT6_I-int	2	1721	67.2791243159		Motif:Polinton-1_CGi	1	1120	76.1904761905
Motif:CATCH2LTR_DR	5	10884	91.0185649774		Motif:Copia11-VV_LTR	37	76428	89.3309645145		Motif:hAT-N5_Mad	16	75942	90.9604858125		Motif:tRNA-Asp-GAY	34	44614	80.3841372228		Motif:hAT-25_DR	16	27560	87.4920634921		Motif:MULE-1_CapOwc	12	68897	97.5463683987		Motif:Sola2-1_EmiHux	2	4858	93.2437619962		Motif:Nimb-12_DR	1	3189	94.9107142857		Motif:RCC9	2	1723	67.3573103987		Motif:PlatERVP1-int	1	1121	76.2585034014
Motif:tRNA-2_DRe	4	10888	91.0520153872		Motif:Novosib-3_CR	36	76464	89.373042218		Motif:Gypsy-1_RP-LTR	16	75958	90.9796500138		Motif:SSU-rRNA_Lvi	34	44648	80.4453973802		Motif:ENSPM2_VV	16	27576	87.5428571429		Motif:MuDr-1x_SP	12	68909	97.5633583463		Motif:Sola1-1_ACas	2	4860	93.2821497121		Motif:Nematis_Cr	1	3190	94.9404761905		Motif:R2-1_TSP	2	1725	67.4354964816		Motif:PFRP5	1	1122	76.3265306122
Motif:TDR8B	4	10892	91.085465797		Motif:Mariner-59N1_HSal	36	76500	89.4151199215		Motif:Gypsy-13_SMo-LTR	16	75974	90.998814215		Motif:Sola1-2_AC	34	44682	80.5066575377		Motif:EnSpm-12_OS	16	27592	87.5936507937		Motif:Mariner-68_HSal	12	68921	97.5803482939		Motif:Sat-1_TSy	2	4862	93.320537428		Motif:MuDR-6_FV	1	3191	94.9702380952		Motif:R1_DYa	2	1727	67.5136825645		Motif:P-1_AllMac	1	1123	76.3945578231
Motif:Sola1-2_AC	4	10896	91.1189162067		Motif:hAT-2N1_TC	36	76536	89.4571976249		Motif:ERV46_MD_I-int	16	75990	91.0179784163		Motif:Mariner-30_HM	34	44716	80.5679176952		Motif:DNA3-8_STu	16	27608	87.6444444444		Motif:LatiHarb1-N3A	12	68933	97.5973382415		Motif:RTEX-1_CR	2	4864	93.358925144		Motif:MuDR-10_GM	1	3192	95		Motif:Polinton-2_PBa	2	1729	67.5918686474		Motif:OSTE15	1	1124	76.462585034
Motif:REP-1_ZM	4	10900	91.1523666165		Motif:hAT-1960_Ami	36	76572	89.4992753284		Motif:EnSpm-6N1_DR	16	76006	91.0371426176		Motif:LTR24_Sar	34	44750	80.6291778527		Motif:DNA-2-32_DR	16	27624	87.6952380952		Motif:Kiri-6_AAe	12	68945	97.6143281892		Motif:RTE2_ZM	2	4866	93.3973128599		Motif:MSAT_MG	1	3193	95.0297619048		Motif:Polinton1_SM	2	1731	67.6700547303		Motif:OK	1	1125	76.5306122449
Motif:P-13_HM	4	10904	91.1858170263		Motif:EnSpm-1_BF	36	76608	89.5413530319		Motif:EnSpm1_TM	16	76022	91.0563068189		Motif:Harbinger-2_DR	34	44784	80.6904380101		Motif:DNA-2-24B_DR	16	27640	87.746031746		Motif:hAT-42_HM	12	68957	97.6313181368		Motif:RNLTR2d	2	4868	93.4357005758		Motif:MERMITE18C	1	3194	95.0595238095		Motif:Perere-4	2	1733	67.7482408131		Motif:Novosib-1_EmiHux	1	1126	76.5986394558
Motif:OposCharlie1	4	10908	91.219267436		Motif:DNA2-5_DR	36	76644	89.5834307354		Motif:Dada-U6_SS	16	76038	91.0754710201		Motif:DNA3-14_CGi	34	44818	80.7516981676		Motif:Daphne-16_HMa	16	27656	87.7968253968		Motif:Gypsy-39_Mad-I	12	68969	97.6483080844		Motif:R1_DMo	2	4870	93.4740882917		Motif:MdoLTR2-int	1	3195	95.0892857143		Motif:P-1_AllMac	2	1735	67.826426896		Motif:MUDROS2	1	1127	76.6666666667
Motif:MuDR-N1_ZM	4	10912	91.2527178458		Motif:EnSpm-N1_DR	35	76679	89.6243396138		Motif:CR1-84_HM	16	76054	91.0946352214		Motif:Gypsy61-I_AG	33	44851	80.8111565557		Motif:Chapaev-7_HM	16	27672	87.8476190476		Motif:DNA3-4_CGi	12	68981	97.665298032		Motif:Polinton-5_NV	2	4872	93.5124760077		Motif:Mariner-N22_HSal	1	3196	95.119047619		Motif:MUMET1	2	1737	67.9046129789		Motif:MuDR-9_FV	1	1128	76.7346938776
Motif:Mariner-N3_DR	4	10916	91.2861682556		Motif:EnSpm-8_DR	35	76714	89.6652484922		Motif:Ci000025	16	76070	91.1137994227		Motif:Gypsy-35_CQ-I	33	44884	80.8706149439		Motif:Z-REP	15	27687	87.8952380952		Motif:Chapaev3-1_HR	12	68993	97.6822879796		Motif:piggyBac-1N1_XT	2	4874	93.5508637236		Motif:Mariner-7_DRh	1	3197	95.1488095238		Motif:MUDRAVI1	2	1739	67.9827990618		Motif:MuDR-6_FV	1	1129	76.8027210884
Motif:Mariner-4_LHu	4	10920	91.3196186653		Motif:DNA-2-18_DR	35	76749	89.7061573706		Motif:Chapaev-6_HM	16	76086	91.132963624		Motif:DNA-2-24_DR	33	44917	80.930073332		Motif:P-2_Hrobusta	15	27702	87.9428571429		Motif:Polinton-8_NVi	11	69004	97.6978620983		Motif:Nimb-4_DR	2	4876	93.5892514395		Motif:Mariner-18_HSal	1	3198	95.1785714286		Motif:MERMITE18C	2	1741	68.0609851446		Motif:MuDR-4_GM	1	1130	76.8707482993
Motif:Mariner-38B_SIn	4	10924	91.3530690751		Motif:Helitron-N3_PM	34	76783	89.7458974239		Motif:BEL1-I_SM	16	76102	91.1521278252		Motif:Ag-Jock-1	33	44950	80.9895317201		Motif:L2-27_ACar	15	27717	87.9904761905		Motif:Penelope-1_DR	11	69015	97.7134362169		Motif:MINIME_DN	2	4878	93.6276391555		Motif:LTR53-int	1	3199	95.2083333333		Motif:Merlin-1_DR	2	1743	68.1391712275		Motif:MuDR-4_EPa	1	1131	76.9387755102
Motif:Mariner-30_HM	4	10928	91.3865194849		Motif:BEL-10_DWil-I	34	76817	89.7856374772		Motif:ZhAT8_ZM	15	76117	91.1700942639		Motif:LTR44B_MD	32	44982	81.0471883389		Motif:HELMET3	15	27732	88.0380952381		Motif:MuDR-1_LHu	11	69026	97.7290103356		Motif:Mariner-N6_SIn	2	4880	93.6660268714		Motif:LTR44B_MD	1	3200	95.2380952381		Motif:MdoLTR2-int	2	1745	68.2173573104		Motif:MuDR3x_AP	1	1132	77.0068027211
Motif:Mariner-101_HSal	4	10932	91.4199698946		Motif:RTEX-1_CR	33	76850	89.8242087054		Motif:tRNA-Val-GTA	15	76132	91.1880607026		Motif:LTR160B_MD	32	45014	81.1048449577		Motif:Helitron-4N1_SMo	15	27747	88.0857142857		Motif:MERMITE18C	11	69037	97.7445844542		Motif:Mariner-38B_SIn	2	4882	93.7044145873		Motif:LTR1A2_ML	1	3201	95.2678571429		Motif:Mariner-N6_SIn	2	1747	68.2955433933		Motif:MuDr-1x_SP	1	1133	77.074829932
Motif:LTR44B_MD	4	10936	91.4534203044		Motif:RMER12	33	76883	89.8627799336		Motif:tRNA-Leu-TTG	15	76147	91.2060271413		Motif:Helitron-N3_DR	32	45046	81.1625015765		Motif:Gypsy-35_Mad-I	15	27762	88.1333333333		Motif:LatiHarb1-N1	11	69048	97.7601585728		Motif:Mariner-14_SIn	2	4884	93.7428023033		Motif:LTR1420_EC	1	3202	95.2976190476		Motif:LSU-rRNA_Sce	2	1749	68.3737294762		Motif:MuDR-1_LHu	1	1134	77.1428571429
Motif:Kolobok-3_DR	4	10940	91.4868707142		Motif:HELMET3	32	76915	89.9001823367		Motif:OSMAR1	15	76162	91.22399358		Motif:HAT-4N1_Mad	32	45078	81.2201581953		Motif:EnSpm-9_DR	15	27777	88.180952381		Motif:Gypsy-38_NVi-LTR	11	69059	97.7757326915		Motif:LTR9_OG	2	4886	93.7811900192		Motif:LOOPERN2_DR	1	3203	95.3273809524		Motif:LINE1F_MT	2	1751	68.451915559		Motif:MOSAT-2_DR	1	1135	77.2108843537
Motif:Helitron-N3_DR	4	10944	91.5203211239		Motif:Gypsy-133_GM-I	32	76947	89.9375847398		Motif:Mariner-62_HSal	15	76177	91.2419600187		Motif:DNA3-1_STu	32	45110	81.2778148141		Motif:EnSpm-5_HV	15	27792	88.2285714286		Motif:EnSpm-13_ZM	11	69070	97.7913068101		Motif:LTR2_Sar	2	4888	93.8195777351		Motif:LatiHarb1-2	1	3204	95.3571428571		Motif:LIN4b_SM	2	1753	68.5301016419		Motif:MonGyp1	1	1136	77.2789115646
Motif:Helitron-1_HM	4	10948	91.5537715337		Motif:EnSpm-11_OS	32	76979	89.9749871429		Motif:L1-56_DR	15	76192	91.2599264574		Motif:DNA2-10_CGi	32	45142	81.3354714329		Motif:DIRS-21_ACar	15	27807	88.2761904762		Motif:SAT-23_DR	10	69080	97.8054650998		Motif:LTR-2_Mad-I	2	4890	93.8579654511		Motif:L2-8_NVi	1	3205	95.3869047619		Motif:L2-2_NVi	2	1755	68.6082877248		Motif:MMERVK10D3_I-int	1	1137	77.3469387755
Motif:hAT-51_HM	4	10952	91.5872219435		Motif:DNA9TA1_DR	32	77011	90.012389546		Motif:Gypsy-38_DWil-I	15	76207	91.2778928961		Motif:P-2_HM	31	45173	81.3913262824		Motif:tRNA-Gly-GGY	14	27821	88.3206349206		Motif:Sat-1_CPa	10	69090	97.8196233895		Motif:LTR10B_SS	2	4892	93.896353167		Motif:L2-8_AAe	1	3206	95.4166666667		Motif:L1_Canis1	2	1757	68.6864738077		Motif:MinoAg1	1	1138	77.4149659864
Motif:hAT-21N2_LMi	4	10956	91.6206723532		Motif:ATREP18	32	77043	90.0497919491		Motif:EnSpm-7_DR	15	76222	91.2958593348		Motif:L2-9_NVi	31	45204	81.4471811319		Motif:SFV1-15_AMi-I	14	27835	88.3650793651		Motif:Polinton-4_PBa	10	69100	97.8337816792		Motif:LSU-rRNA_Sce	2	4894	93.9347408829		Motif:L1_AC_13	1	3207	95.4464285714		Motif:L1-56_XT	2	1759	68.7646598905		Motif:MERMITE-18	1	1139	77.4829931973
Motif:Harbinger-8_DR	4	10960	91.654122763		Motif:Ronin3_I-int	31	77074	90.0860255271		Motif:EnSpm-4_HV	15	76237	91.3138257735		Motif:EnSpm-2_HM	31	45235	81.5030359813		Motif:REP-4_PBa	14	27849	88.4095238095		Motif:LSU-rRNA_Hca	10	69110	97.8479399689		Motif:L1-80_ACar	2	4896	93.9731285988		Motif:L1_AC_12	1	3208	95.4761904762		Motif:L1-4_Mad	2	1761	68.8428459734		Motif:Mariner-6_PR	1	1140	77.5510204082
Motif:Gypsy-46_Mad-I	4	10964	91.6875731728		Motif:L1-11_DR	31	77105	90.1222591051		Motif:CryptonV-2_DR	15	76252	91.3317922121		Motif:DNA5-4_CGi	31	45266	81.5588908308		Motif:MuDR-8_VV	14	27863	88.453968254		Motif:LINE1-15_SBi	10	69120	97.8620982585		Motif:L1-1_STu	2	4898	94.0115163148		Motif:L1-95_Cis	1	3209	95.505952381		Motif:L1-39_DR	2	1763	68.9210320563		Motif:Mariner-68_HSal	1	1141	77.619047619
Motif:GGERVL-B-int	4	10968	91.7210235825		Motif:hAT-N4_ALy	31	77136	90.1584926832		Motif:Chapaev-8_HM	15	76267	91.3497586508		Motif:TRAS3_BM	30	45296	81.6129439109		Motif:L1-61_ACar	14	27877	88.4984126984		Motif:LatiHarb1-N3B	10	69130	97.8762565482		Motif:ISL2EU-6_CGi	2	4900	94.0499040307		Motif:L1-94_Cis	1	3210	95.5357142857		Motif:L1-18_Lch	2	1765	68.9992181392		Motif:Mariner-4_LHu	1	1142	77.6870748299
Motif:EnSpm-N18_DR	4	10972	91.7544739923		Motif:Gypsy-12_PSH-I	31	77167	90.1947262612		Motif:Tx1-42_DR	14	76281	91.366527327		Motif:Transib-3_HM	30	45326	81.666996991		Motif:Harbinger3_DR	14	27891	88.5428571429		Motif:L1-55_XT	10	69140	97.8904148379		Motif:ID4	2	4902	94.0882917466		Motif:L1-44_XT	1	3211	95.5654761905		Motif:Kolobok-3_Aplcal	2	1767	69.077404222		Motif:Mariner26_CB	1	1143	77.7551020408
Motif:EnSpm-5_HM	4	10976	91.7879244021		Motif:DIRS-4N3_DR	31	77198	90.2309598392		Motif:Tx1-3_PM	14	76295	91.3832960031		Motif:SHAMUDRAV_MT	30	45356	81.7210500712		Motif:Gypsy-13_Mad-I	14	27905	88.5873015873		Motif:L1-48_DR	10	69150	97.9045731276		Motif:HERV17-int	2	4904	94.1266794626		Motif:L1-3_VC	1	3212	95.5952380952		Motif:Jockey-6_DK	2	1769	69.1555903049		Motif:Mariner-25_LCh	1	1144	77.8231292517
Motif:EnSpm-14_HM	4	10980	91.8213748118		Motif:hAT-1N1_AC	30	77228	90.2660245921		Motif:Transib-N3_AAe	14	76309	91.4000646792		Motif:SFV1-15_AMi-I	30	45386	81.7751031513		Motif:Gypsy-119_AA-LTR	14	27919	88.6317460317		Motif:Harbinger2-2_ES	10	69160	97.9187314172		Motif:Helitron-N21_CGi	2	4906	94.1650671785		Motif:L1-2_LA	1	3213	95.625		Motif:Jockey-2_DPer	2	1771	69.2337763878		Motif:Mariner-16_SIn	1	1145	77.8911564626
Motif:DNA6-9_CGi	4	10984	91.8548252216		Motif:Harbinger-8_DR	30	77258	90.301089345		Motif:Kolobok-3_Aplcal	14	76323	91.4168333553		Motif:HATN11_DR	30	45416	81.8291562314		Motif:ERV6B-MD_I-int	14	27933	88.6761904762		Motif:Gypsy-29_DWil-I	10	69170	97.9328897069		Motif:Helitron-1_DT	2	4908	94.2034548944		Motif:L1-1C_Cpo	1	3214	95.6547619048		Motif:ISL2EU-1_CFl	2	1773	69.3119624707		Motif:Mariner-14_SIn	1	1146	77.9591836735
Motif:DNA2-7_CGi	4	10988	91.8882756314		Motif:Gypsy-30_DWil-I	30	77288	90.3361540979		Motif:Homo6	14	76337	91.4336020314		Motif:Gypsy-8_DMoj-I	30	45446	81.8832093115		Motif:DNA-8-27_DR	14	27947	88.7206349206		Motif:Gypsy-15_LBS-I	10	69180	97.9470479966		Motif:hAT-N13_AMi	2	4910	94.2418426104		Motif:L1-17_XT	1	3215	95.6845238095		Motif:IS3EU-N1_CGi	2	1775	69.3901485536		Motif:Mariner-10_PBa	1	1147	78.0272108844
Motif:DNA2-10_CGi	4	10992	91.9217260411		Motif:DNA-8-29_DR	30	77318	90.3712188508		Motif:Helitron1_AG	14	76351	91.4503707075		Motif:DNA3-1_CGi	30	45476	81.9372623917		Motif:DNA4-4_CGi	14	27961	88.7650793651		Motif:Gypsy134-LTR_DR	10	69190	97.9612062863		Motif:Gypsy-9-I_CR	2	4912	94.2802303263		Motif:L1-15c_Lch	1	3216	95.7142857143		Motif:IS3EU-4_DR	2	1777	69.4683346364		Motif:MAR1_TV	1	1148	78.0952380952
Motif:DIRS-4N3_DR	4	10996	91.9551764509		Motif:Polinton-1_NVi	29	77347	90.4051147786		Motif:HAT-8_Mad	14	76365	91.4671393836		Motif:Tx1-11_CGi	29	45505	81.9895137025		Motif:Copia2-LTR_VC	14	27975	88.8095238095		Motif:EnSpm-N18_DR	10	69200	97.975364576		Motif:Gypsy-9_DPu-I	2	4914	94.3186180422		Motif:L1-15b_Lch	1	3217	95.744047619		Motif:HERVS71-int	2	1779	69.5465207193		Motif:MamSINE1	1	1149	78.1632653061
Motif:Chapaev-6_HM	4	11000	91.9886268607		Motif:Polinton-1N1_DR	29	77376	90.4390107064		Motif:HAT-10_Mad	14	76379	91.4839080597		Motif:Kolobok-7_CGi	29	45534	82.0417650132		Motif:Copia11-VV_LTR	14	27989	88.853968254		Motif:DNA8-10_CGi	10	69210	97.9895228656		Motif:Gypsy-7_DPu-I	2	4916	94.3570057582		Motif:L1-13_DR	1	3218	95.7738095238		Motif:hATx-3_HM	2	1781	69.6247068022		Motif:LTR1A2_ML	1	1150	78.231292517
Motif:Chapaev-3B_HM	4	11004	92.0220772704		Motif:Mariner-N22_HSal	29	77405	90.4729066343		Motif:Gypsy-607_AA-I	14	76393	91.5006767359		Motif:Helitron-N34_CGi	29	45563	82.094016324		Motif:tRNA-His-CAY_	13	28002	88.8952380952		Motif:Copia3-I_XT	10	69220	98.0036811553		Motif:Gypsy47-I_DR	2	4918	94.3953934741		Motif:L1-11_LCh	1	3219	95.8035714286		Motif:hAT-N6_ACar	2	1783	69.7028928851		Motif:LTR18D_ML	1	1151	78.2993197279
Motif:BEL-21_DWil-I	4	11008	92.0555276802		Motif:hAT-32_HM	29	77434	90.5068025621		Motif:Gypsy-55_CGi-I	14	76407	91.517445412		Motif:hAT-42_HM	29	45592	82.1462676348		Motif:SART-1_LHu	13	28015	88.9365079365		Motif:RTEX-1_CR	9	69229	98.016423616		Motif:Gypsy-29_DWil-I	2	4920	94.43378119		Motif:Kolobok-N9_DR	1	3220	95.8333333333		Motif:hAT-N47B_DR	2	1785	69.7810789679		Motif:LTR15_FC	1	1152	78.3673469388
Motif:ATREP18	4	11012	92.08897809		Motif:Gypsy-19_CGi-I	29	77463	90.5406984899		Motif:DNA-8-5_DR	14	76421	91.5342140881		Motif:EnSpm-N2_DR	29	45621	82.1985189456		Motif:RTAg4	13	28028	88.9777777778		Motif:RT2	9	69238	98.0291660767		Motif:Gypsy-28_DYa-I	2	4922	94.472168906		Motif:Kolobok-1_LG	1	3221	95.8630952381		Motif:hAT-N20_DR	2	1787	69.8592650508		Motif:LTR-12D_Gav	1	1153	78.4353741497
Motif:Academ-1_HM	4	11016	92.1224284997		Motif:SSU-rRNA_Sme	28	77491	90.5734255926		Motif:DNA-1-8_DR	14	76435	91.5509827642		Motif:EnSpm-43_SBi	29	45650	82.2507702564		Motif:OK	13	28041	89.019047619		Motif:Kolobok-N9_DR	9	69247	98.0419085374		Motif:Gypsy-23_PSo-I	2	4924	94.5105566219		Motif:Kiri-6_AAe	1	3222	95.8928571429		Motif:hATm-41_HM	2	1789	69.9374511337		Motif:LTR10B_BT	1	1154	78.5034013605
Motif:U2	3	11019	92.1475163071		Motif:LTR-12D_Crp	28	77519	90.6061526953		Motif:Dada-1_BF	14	76449	91.5677514403		Motif:CR1-20_CQ	29	45679	82.3030215672		Motif:MuDR-11N_VV	13	28054	89.0603174603		Motif:Kolobok-2_AP	9	69256	98.0546509982		Motif:Gypsy-23_DEl-I	2	4926	94.5489443378		Motif:Kiri-18_AAe	1	3223	95.9226190476		Motif:hATm-27_HM	2	1791	70.0156372166		Motif:LSU-rRNA_Hsa	1	1155	78.5714285714
Motif:tRNA-Thr-ACG	3	11022	92.1726041144		Motif:Gypsy-4_RO-I	28	77547	90.638879798		Motif:Copia-7_ES-I	14	76463	91.5845201164		Motif:Academ-1_HM	29	45708	82.355272878		Motif:Mariner-N13_HSal	13	28067	89.1015873016		Motif:Jockey-2_DGri	9	69265	98.0673934589		Motif:Gypsy-230_DR-LTR	2	4928	94.5873320537		Motif:Jockey-5_DVi	1	3224	95.9523809524		Motif:hAT-2_HM	2	1793	70.0938232995		Motif:LSU-rRNA_Hca	1	1156	78.6394557823
Motif:TRNALysTTT_CB	3	11025	92.1976919217		Motif:Gypsy-226_DR-LTR	28	77575	90.6716069007		Motif:TRAS1	13	76476	91.60009103		Motif:RT1	28	45736	82.4057224194		Motif:LSU-rRNA_Sce	13	28080	89.1428571429		Motif:HARB-6_ALy	9	69274	98.0801359196		Motif:Gypsy-22_DWil-I	2	4930	94.6257197697		Motif:Jockey-1_DK	1	3225	95.9821428571		Motif:HAT2_CE	2	1795	70.1720093823		Motif:Loa-2_DF	1	1157	78.7074829932
Motif:tRNA-Leu-CTY	3	11028	92.2227797291		Motif:DNA9-5_DR	28	77603	90.7043340035		Motif:Sola2-2_LHu	13	76489	91.6156619435		Motif:Penelope-12_HM	28	45764	82.4561719609		Motif:L1-71_ACar	13	28093	89.1841269841		Motif:Copia-58_BG-I	9	69283	98.0928783803		Motif:Gypsy-199_ZM-I	2	4932	94.6641074856		Motif:ISL2EU-N1_CGi	1	3226	96.0119047619		Motif:hAT-18_LCh	2	1797	70.2501954652		Motif:LatiHarb1-N4A	1	1158	78.7755102041
Motif:tRNALeuCTT_CB	3	11031	92.2478675364		Motif:Daphne-38_HMa	28	77631	90.7370611062		Motif:MuDr-3_HM	13	76502	91.631232857		Motif:LTR1A2_ML	28	45792	82.5066215023		Motif:GYCUME1_LTR	13	28106	89.2253968254		Motif:Copia-1_CMe-I	9	69292	98.105620841		Motif:Gypsy14-LTR_Dpse	2	4934	94.7024952015		Motif:ISL2EU-3N1_CFl	1	3227	96.0416666667		Motif:Harbinger-N2_SP	2	1799	70.3283815481		Motif:LatiHarb1-1	1	1159	78.843537415
Motif:Transib-3_HM	3	11034	92.2729553437		Motif:SAT2_CM	27	77658	90.7686193838		Motif:L2B-4B_AAe	13	76515	91.6468037706		Motif:L1_AC_8	28	45820	82.5570710438		Motif:EnSpm-11_OS	13	28119	89.2666666667		Motif:Ves2_ML	8	69300	98.1169474727		Motif:Gypsy-13_SMo-LTR	2	4936	94.7408829175		Motif:I-1_DP	1	3228	96.0714285714		Motif:Harbinger-7_PGr	2	1801	70.406567631		Motif:L2_Ele3	1	1160	78.9115646259
Motif:STOWAWAY50_OS	3	11037	92.298043151		Motif:RLTR20C1_MM	27	77685	90.8001776614		Motif:ISL2EU-2_HM	13	76528	91.6623746841		Motif:L1-47B_ACar	28	45848	82.6075205852		Motif:DNA9-4_FV	13	28132	89.3079365079		Motif:tRNA-3_DRe	8	69308	98.1282741045		Motif:Gypsy-13_CFl-I	2	4938	94.7792706334		Motif:Helitron-N3_ZM	1	3229	96.1011904762		Motif:HAL1-1E_Cpo	2	1803	70.4847537138		Motif:L2-3_LCh	1	1161	78.9795918367
Motif:SPMLIKE	3	11040	92.3231309584		Motif:L1-2_VC	27	77712	90.831735939		Motif:Helitron-3N2_PM	13	76541	91.6779455976		Motif:Helitron-N1_HSal	28	45876	82.6579701267		Motif:DNA-8-1_HM	13	28145	89.3492063492		Motif:Sola3-1_CapOwc	8	69316	98.1396007362		Motif:Gypsy12-I_VC	2	4940	94.8176583493		Motif:Helitron-N34_CGi	1	3230	96.130952381		Motif:Gypsy-9_RO-I	2	1805	70.5629397967		Motif:L2-22_NV	1	1162	79.0476190476
Motif:ROO_I-int	3	11043	92.3482187657		Motif:hATm-12_HM	27	77739	90.8632942167		Motif:Gypsy-30_CGi-I	13	76554	91.6935165112		Motif:EnSpm-5_HV	28	45904	82.7084196681		Motif:DNA8-10_DR	13	28158	89.3904761905		Motif:PiggyBac-1_EmiHux	8	69324	98.150927368		Motif:Gypsy118-LTR_DR	2	4942	94.8560460653		Motif:Helitron-N2_DR	1	3231	96.1607142857		Motif:Gypsy-97_GM-I	2	1807	70.6411258796		Motif:L2-12a_Lch	1	1163	79.1156462585
Motif:RLTR31D_MM	3	11046	92.373306573		Motif:hAT-310_Ami	27	77766	90.8948524943		Motif:ERV1-N6-I_DR	13	76567	91.7090874247		Motif:EnSpm-1_NVi	28	45932	82.7588692096		Motif:DNA2-7_DR	13	28171	89.4317460317		Motif:Mariner-79_HSal	8	69332	98.1622539997		Motif:Gyp_I_MT-int	2	4944	94.8944337812		Motif:Helitron-N1_SBi	1	3232	96.1904761905		Motif:Gypsy-94_GM-I	2	1809	70.7193119625		Motif:L1-N3_FV	1	1164	79.1836734694
Motif:REP-2_DF	3	11049	92.3983943803		Motif:DNA-TA-4_DR	27	77793	90.9264107719		Motif:EnSpm-6_FV	13	76580	91.7246583382		Motif:DNA9-5_DR	28	45960	82.809318751		Motif:DNA2-5_DR	13	28184	89.473015873		Motif:LTR-83_Gav	8	69340	98.1735806315		Motif:ERV24_MD_I-int	2	4946	94.9328214971		Motif:Helitron-N13_SBi	1	3233	96.2202380952		Motif:Gypsy-6_PSH-I	2	1811	70.7974980453		Motif:L1MEh	1	1165	79.2517006803
Motif:REP-1_DEl	3	11052	92.4234821877		Motif:Caulimovirus-3_GMa	27	77820	90.9579690495		Motif:EnSpm-21_HMa	13	76593	91.7402292518		Motif:DNA4-42B_CGi	28	45988	82.8597682925		Motif:Polinton-9_NVi	12	28196	89.5111111111		Motif:LTR44B_MD	8	69348	98.1849072632		Motif:ERV1-7_DR-I	2	4948	94.9712092131		Motif:Helitron-2_SMo	1	3234	96.25		Motif:Gypsy-6_HMM-I	2	1813	70.8756841282		Motif:L1_Ele26	1	1166	79.3197278912
Motif:Polinton-1_DGr	3	11055	92.448569995		Motif:Gypsy-88_PAb-I	26	77846	90.988358502		Motif:DNA-2-12_DR	13	76606	91.7558001653		Motif:DIRS-15B_DR	28	46016	82.9102178339		Motif:L1-58_ACar	12	28208	89.5492063492		Motif:LTR-12B1_Crp	8	69356	98.1962338949		Motif:EnSpm-22_SBi	2	4950	95.009596929		Motif:Helitron1_AG	1	3235	96.2797619048		Motif:Gypsy-6_AA-I	2	1815	70.9538702111		Motif:L1_AC_7	1	1167	79.387755102
Motif:P-27_HM	3	11058	92.4736578023		Motif:EnSpm-9_HM	26	77872	91.0187479546		Motif:Daphne-73_HMa	13	76619	91.7713710788		Motif:Copia-75_Mad-LTR	28	46044	82.9606673754		Motif:hAT-N145_DR	12	28220	89.5873015873		Motif:L1-2_VC	8	69364	98.2075605267		Motif:EnSpm-17_HM	2	4952	95.0479846449		Motif:hAT-N36C_DR	1	3236	96.3095238095		Motif:Gypsy-62_BG-LTR	2	1817	71.032056294		Motif:L1_AC_13	1	1168	79.4557823129
Motif:P-26_HM	3	11061	92.4987456096		Motif:DNA-X-17_DR	26	77898	91.0491374071		Motif:Dada-U6_DR	13	76632	91.7869419924		Motif:Zisupton-3_DR	27	46071	83.0093151475		Motif:hATm-47_HM	12	28232	89.6253968254		Motif:Helitron-N46_CGi	8	69372	98.2188871584		Motif:EnSpm-13_ZM	2	4954	95.0863723608		Motif:hAT-N1_VC	1	3237	96.3392857143		Motif:Gypsy-61_SB-I	2	1819	71.1102423769		Motif:L1-7_GM	1	1169	79.5238095238
Motif:MuDR-8_Mad	3	11064	92.523833417		Motif:Sat-2_STu	25	77923	91.0783580345		Motif:CEREBA_HV-int	13	76645	91.8025129059		Motif:Kolobok-2_XT	27	46098	83.0579629196		Motif:Gypsy-600_AA-I	12	28244	89.6634920635		Motif:Helitron-N35_CGi	8	69380	98.2302137902		Motif:DNA9TA1_DR	2	4956	95.1247600768		Motif:hAT-N1_SP	1	3238	96.369047619		Motif:Gypsy-60_CGi-I	2	1821	71.1884284597		Motif:L1-7_Cis	1	1170	79.5918367347
Motif:MuDR1_ZM	3	11067	92.5489212243		Motif:Sat-1_CPa	25	77948	91.1075786619		Motif:CENSAT_ZM	13	76658	91.8180838194		Motif:Helitron-N35_CGi	27	46125	83.1066106917		Motif:Gypsy3-LTR_AP	12	28256	89.7015873016		Motif:Helitron-N34_CGi	8	69388	98.2415404219		Motif:DNA9-4_CGi	2	4958	95.1631477927		Motif:HATN15_DR	1	3239	96.3988095238		Motif:Gypsy-5_DVir-I	2	1823	71.2666145426		Motif:L1-65_ACar	1	1171	79.6598639456
Motif:MuDR-1_LHu	3	11070	92.5740090316		Motif:L1-71_ACar	25	77973	91.1367992894		Motif:ATCopia80_I-int	13	76671	91.833654733		Motif:hAT-13_DR	27	46152	83.1552584638		Motif:Gypsy-210_DR-I	12	28268	89.7396825397		Motif:Harbinger-3_BF	8	69396	98.2528670537		Motif:DNA3-11_CGi	2	4960	95.2015355086		Motif:HATN11_DR	1	3240	96.4285714286		Motif:Gypsy58-I_AG	2	1825	71.3448006255		Motif:L1-5_XT	1	1172	79.7278911565
Motif:MuDr-1_HV	3	11073	92.5990968389		Motif:hATm-40_HM	25	77998	91.1660199168		Motif:Zisupton-1_DR	12	76683	91.8480278839		Motif:EnSpm2_TM	27	46179	83.2039062359		Motif:DIRS-8B_DR	12	28280	89.7777777778		Motif:DNA-3_FV	8	69404	98.2641936854		Motif:DIRS-21_ACar	2	4962	95.2399232246		Motif:hATa-1_EHux	1	3241	96.4583333333		Motif:Gypsy-50_MLP-I	2	1827	71.4229867084		Motif:L1-53_DR	1	1173	79.7959183673
Motif:LSU-rRNA_Dme	3	11076	92.6241846463		Motif:Gypsy-223_AA-I	25	78023	91.1952405442		Motif:tRNA-Phe-TTY	12	76695	91.8624010349		Motif:EnSpm-15_HM	27	46206	83.252554008		Motif:CR1-35_HM	12	28292	89.8158730159		Motif:Copia-4_ADe-I	8	69412	98.2755203171		Motif:DIRS-1_CR	2	4964	95.2783109405		Motif:hAT-5_PTr	1	3242	96.4880952381		Motif:Gypsy4-SB_I-int	2	1829	71.5011727912		Motif:L1-44_DR	1	1174	79.8639455782
Motif:L2_Plat1i	3	11079	92.6492724536		Motif:EnSpm-16_DR	25	78048	91.2244611716		Motif:RLG_scMaximus_1_3-I	12	76707	91.8767741858		Motif:Copia-47_Mad-LTR	27	46233	83.3012017801		Motif:tRNA-Trp-TGG	11	28303	89.8507936508		Motif:Copia-3_Trm-I	8	69420	98.2868469489		Motif:Dada-1_BF	2	4966	95.3166986564		Motif:hAT-5_LCh	1	3243	96.5178571429		Motif:Gypsy-42_GA-I	2	1831	71.5793588741		Motif:L1-3_Mad	1	1175	79.9319727891
Motif:L2-12b_Lch	3	11082	92.6743602609		Motif:Zisupton-3_DR	24	78072	91.252512974		Motif:Polinton-5_PBa	12	76719	91.8911473368		Motif:tRNA-Thr-ACA	26	46259	83.3480477829		Motif:tRNAPro_CB	11	28314	89.8857142857		Motif:Copia-30_Pru-I	8	69428	98.2981735806		Motif:Crack-2_SP	2	4968	95.3550863724		Motif:hAT-4_VC	1	3244	96.5476190476		Motif:Gypsy-41_GA-I	2	1833	71.657544957		Motif:L1-35_AAe	1	1176	80
Motif:L1-79_DR	3	11085	92.6994480682		Motif:Sola2-3_DPu	24	78096	91.2805647763		Motif:Mariner-2_SLL	12	76731	91.9055204877		Motif:Mariner-17_AEc	26	46285	83.3948937857		Motif:tRNA-Ala-GCY_	11	28325	89.9206349206		Motif:Tx1-25_DR	7	69435	98.3080843834		Motif:Copia-6_EPa-LTR	2	4970	95.3934740883		Motif:hAT-42_Lch	1	3245	96.5773809524		Motif:Gypsy-33_BRa-I	2	1835	71.7357310399		Motif:L1-2_VC	1	1177	80.0680272109
Motif:L1-15_DR	3	11088	92.7245358756		Motif:LatiHarb1-1	24	78120	91.3086165786		Motif:Mariner-29_HM	12	76743	91.9198936387		Motif:LTR4_Str	26	46311	83.4417397885		Motif:Sola3-1_BF	11	28336	89.9555555556		Motif:Mariner-2_SLL	7	69442	98.3179951862		Motif:Copia-37_CQ-I	2	4972	95.4318618042		Motif:hAT-310_Ami	1	3246	96.6071428571		Motif:Gypsy-32_GM-I	2	1837	71.8139171228		Motif:L1-26B_ACar	1	1178	80.1360544218
Motif:L1-11_GM	3	11091	92.7496236829		Motif:ISL2EU-8_CGi	24	78144	91.3366683809		Motif:Kiri-2_AAe	12	76755	91.9342667896		Motif:Helitron-2_HM	26	46337	83.4885857912		Motif:Ngaro1_DR	11	28347	89.9904761905		Motif:LSU-rRNA_Sce	7	69449	98.327905989		Motif:Copia-33_GM-I	2	4974	95.4702495202		Motif:hAT-2_ESi	1	3247	96.6369047619		Motif:Gypsy-28_Mad-LTR	2	1839	71.8921032056		Motif:L1-26_ACar	1	1179	80.2040816327
Motif:ID	3	11094	92.7747114902		Motif:Gypsy-16_PBa-LTR	24	78168	91.3647201833		Motif:ISL2EU-3N1_CFl	12	76767	91.9486399406		Motif:DNA8-26_DR	26	46363	83.535431794		Motif:LSU-rRNA_Hca	11	28358	90.0253968254		Motif:L2-8_AAe	7	69456	98.3378167917		Motif:Copia-31_Pru-LTR	2	4976	95.5086372361		Motif:hAT-1_ESi	1	3248	96.6666666667		Motif:Gypsy-27_PSo-I	2	1841	71.9702892885		Motif:L1-17_STu	1	1180	80.2721088435
Motif:Helitron-1_DR	3	11097	92.7997992975		Motif:TE-X-7_DR	23	78191	91.3916031605		Motif:hAT-N53_DR	12	76779	91.9630130915		Motif:Dada-tY_PMar	26	46389	83.5822777968		Motif:hAT-17_Croc	11	28369	90.0603174603		Motif:ISL2EU-N1_CGi	7	69463	98.3477275945		Motif:Copia-18_PTc-I	2	4978	95.547024952		Motif:hAT-10_XT	1	3249	96.6964285714		Motif:Gypsy-27_BG-I	2	1843	72.0484753714		Motif:L1-16_Lch	1	1181	80.3401360544
Motif:hATw-1_LV	3	11100	92.8248871049		Motif:Mariner-N10_SIn	23	78214	91.4184861377		Motif:hAT-50_HM	12	76791	91.9773862425		Motif:Chapaev-7_HM	26	46415	83.6291237996		Motif:Gypsy-16_PBa-LTR	11	28380	90.0952380952		Motif:Gypsy-19_SB-I	7	69470	98.3576383973		Motif:Chapaev3-1_HR	2	4980	95.5854126679		Motif:Harbinger-6_LCh	1	3250	96.7261904762		Motif:Gypsy-26_PSo-I	2	1845	72.1266614543		Motif:L1-15_DR	1	1182	80.4081632653
Motif:hAT-N36C_DR	3	11103	92.8499749122		Motif:Mariner-18_HSal	23	78237	91.445369115		Motif:hAT-10_DR	12	76803	91.9917593935		Motif:SSU-rRNA_Ath	25	46440	83.674168033		Motif:DNA-8-36_DR	11	28391	90.1301587302		Motif:Gypsy-16-I_NVi	7	69477	98.3675492001		Motif:CASAT_HD	2	4982	95.6238003839		Motif:Harbinger-3_PGr	1	3251	96.755952381		Motif:Gypsy-25_DYa-I	2	1847	72.2048475371		Motif:L1-13_GM	1	1183	80.4761904762
Motif:hAT-N36B_DR	3	11106	92.8750627195		Motif:LOOPERN2_DR	23	78260	91.4722520922		Motif:Harbinger2-1_NV	12	76815	92.0061325444		Motif:OK	25	46465	83.7192122664		Motif:DNA-8-24_DR	11	28402	90.1650793651		Motif:Gypsy122-LTR_DR	7	69484	98.3774600028		Motif:BMRP1	2	4984	95.6621880998		Motif:Harbinger-3_LCh	1	3252	96.7857142857		Motif:Gypsy-23_ST-I	2	1849	72.28303362		Motif:L1-11_GM	1	1184	80.5442176871
Motif:hAT-32_HM	3	11109	92.9001505268		Motif:L1A-2_MD	23	78283	91.4991350694		Motif:Gypsy8-I_Dpse	12	76827	92.0205056954		Motif:HeT-A3_DVi	25	46490	83.7642564999		Motif:DNA-1-8_DR	11	28413	90.2		Motif:Gypsy-116-LTR_DR	7	69491	98.3873708056		Motif:Ambal-2_FCy	2	4986	95.7005758157		Motif:Harbinger2-2_NV	1	3253	96.8154761905		Motif:Gypsy-22_IS-I	2	1851	72.3612197029		Motif:Kolobok-N9_DR	1	1185	80.612244898
Motif:Harbinger-3_BF	3	11112	92.9252383342		Motif:L1-61_ACar	23	78306	91.5260180467		Motif:Ginger1-N1_DR	12	76839	92.0348788463		Motif:hAT-50_HM	25	46515	83.8093007333		Motif:DNA-11_CGi	11	28424	90.2349206349		Motif:DNA-TA-4_DR	7	69498	98.3972816084		Motif:Academ-4_SP	2	4988	95.7389635317		Motif:GYVIT1_I-int	1	3254	96.8452380952		Motif:Gypsy-22_BD-I	2	1853	72.4394057858		Motif:Kolobok-7_CGi	1	1186	80.6802721088
Motif:Harbinger-21_PGr	3	11115	92.9503261415		Motif:hAT-N127_DR	23	78329	91.5529010239		Motif:Ginger1-6_HM	12	76851	92.0492519973		Motif:Gypsy-35_CGi-I	25	46540	83.8543449668		Motif:DIRS-35_ACar	11	28435	90.2698412698		Motif:CryptonV-2_DR	7	69505	98.4071924112		Motif:5SrRNA-1_BG	2	4990	95.7773512476		Motif:Gypsy-9_DPu-I	1	3255	96.875		Motif:Gypsy-21_DYa-I	2	1855	72.5175918686		Motif:Jockey_Ele2	1	1187	80.7482993197
Motif:Harbinger-1_DR	3	11118	92.9754139488		Motif:HATN11B_DR	23	78352	91.5797840011		Motif:EnSpm1_TD	12	76863	92.0636251482		Motif:Gypsy-16_PBa-LTR	25	46565	83.8993892002		Motif:Daphne-38_HMa	11	28446	90.3047619048		Motif:Copia-57_ZM-I	7	69512	98.4171032139		Motif:Zisupton-5_DR	1	4991	95.7965451056		Motif:Gypsy98-LTR_Dr	1	3256	96.9047619048		Motif:Gypsy-20_PAb-I	2	1857	72.5957779515		Motif:Jockey-9_DPer	1	1188	80.8163265306
Motif:HAL1-3A_ME	3	11121	93.0005017561		Motif:HARB-4N1_Mad	23	78375	91.6066669784		Motif:DNA9-1_CGi	12	76875	92.0779982992		Motif:CR1-1_NV	25	46590	83.9444334336		Motif:TRAS3_BM	10	28456	90.3365079365		Motif:Copia2-I_CR	7	69519	98.4270140167		Motif:Vandal8	1	4992	95.8157389635		Motif:Gypsy-8-I_CR	1	3257	96.9345238095		Motif:Gypsy-1_XT-I	2	1859	72.6739640344		Motif:ISL2EU-N1_CGi	1	1189	80.8843537415
Motif:Gypsy-74-I_ZM	3	11124	93.0255895635		Motif:Gypsy-30_GM-I	23	78398	91.6335499556		Motif:Copia29-VV_I-int	12	76887	92.0923714501		Motif:Ambal-2_FCy	25	46615	83.9894776671		Motif:SR2	10	28466	90.3682539683		Motif:Copia-14_SI-I	7	69526	98.4369248195		Motif:Tx1-34_DR	1	4993	95.8349328215		Motif:Gypsy-8_CCO-I	1	3258	96.9642857143		Motif:Gypsy-1_Trm-I	2	1861	72.7521501173		Motif:ISL2EU-8_CGi	1	1190	80.9523809524
Motif:Gypsy6-I_Dmoj	3	11127	93.0506773708		Motif:Tx1-3_PM	22	78420	91.6592641077		Motif:Copia-1_RP-LTR	12	76899	92.1067446011		Motif:Mariner-36_HM	24	46639	84.0327201312		Motif:SHAMUDRAV_MT	10	28476	90.4		Motif:tRNA-Asp-GAY	6	69532	98.4454197933		Motif:tRNA-Val-GTA	1	4994	95.8541266795		Motif:Gypsy79-I_DR	1	3259	96.994047619		Motif:Gypsy-1_OD-I	2	1863	72.8303362002		Motif:ISL2EU-1_SK	1	1191	81.0204081633
Motif:Gypsy-6_AEc-I	3	11130	93.0757651781		Motif:OK	22	78442	91.6849782599		Motif:ZFERV-2-I_DR	11	76910	92.1199199895		Motif:hAT-N39_DR	24	46663	84.0759625953		Motif:Mariner-79B_HSal	10	28486	90.4317460317		Motif:tRNA-1_DRe	6	69538	98.4539147671		Motif:tRNA-Thr-ACA	1	4995	95.8733205374		Motif:Gypsy-70-I_ZM	1	3260	97.0238095238		Motif:Gypsy-1_LH-I	2	1865	72.908522283		Motif:ISL2EU-17_CGi	1	1192	81.0884353741
Motif:Gypsy-54_GM-LTR	3	11133	93.1008529854		Motif:Gypsy-56_PM-LTR	22	78464	91.710692412		Motif:Tx1-13_CGi	11	76921	92.1330953778		Motif:Harbinger2-2_HM	24	46687	84.1192050594		Motif:LTR66	10	28496	90.4634920635		Motif:RTAg3	6	69544	98.4624097409		Motif:tRNA-Ser-TCA	1	4996	95.8925143954		Motif:Gypsy-6_SB-I	1	3261	97.0535714286		Motif:Gypsy-1_Cop-I	2	1867	72.9867083659		Motif:IS3EU-N3_CGi	1	1193	81.156462585
Motif:Gypsy-43_DWil-I	3	11136	93.1259407928		Motif:Gypsy-22_DY-LTR	22	78486	91.7364065641		Motif:tRNASAT-1_ZM	11	76932	92.1462707662		Motif:Gypsy-6_AEc-LTR	24	46711	84.1624475235		Motif:Gypsy-53_SB-LTR	10	28506	90.4952380952		Motif:RNLTR15A2	6	69550	98.4709047147		Motif:tRNA-Ser-TCA_	1	4997	95.9117082534		Motif:Gypsy6-I_DR	1	3262	97.0833333333		Motif:Gypsy-1_CMe-I	2	1869	73.0648944488		Motif:IS3EU-2_DR	1	1194	81.2244897959
Motif:Gypsy-22_DY-LTR	3	11139	93.1510286001		Motif:Gypsy-210_DR-I	22	78508	91.7621207163		Motif:TRNALysTTT_CB	11	76943	92.1594461546		Motif:Gypsy-40_Mad-I	24	46735	84.2056899876		Motif:Gypsy-46_Mad-I	10	28516	90.526984127		Motif:R1_DPs	6	69556	98.4793996885		Motif:tRNAPro_CB	1	4998	95.9309021113		Motif:Gypsy-6_AEc-LTR	1	3263	97.1130952381		Motif:Gypsy-1_BG-I	2	1871	73.1430805317		Motif:IS3EU-1_DR	1	1195	81.2925170068
Motif:Gypsy-22_DWil-LTR	3	11142	93.1761164074		Motif:Gypsy-148_AA-I	22	78530	91.7878348684		Motif:tRNA-Ile-ATT	11	76954	92.172621543		Motif:EnSpm-1_TA	24	46759	84.2489324517		Motif:Gypsy10-LTR_SP	10	28526	90.5587301587		Motif:Polinton-3_PBa	6	69562	98.4878946623		Motif:tRNA-Lys-AAA	1	4999	95.9500959693		Motif:Gypsy-69_CGi-I	1	3264	97.1428571429		Motif:Gypsy-1_AC-I	2	1873	73.2212666145		Motif:I_Ele14	1	1196	81.3605442177
Motif:Gypsy-210_DR-I	3	11145	93.2012042148		Motif:Academ-4_SP	22	78552	91.8135490205		Motif:tRNA-Gln-CAA	11	76965	92.1857969313		Motif:CACTA-1_CapOwc	24	46783	84.2921749158		Motif:EnSpm-5_DR	10	28536	90.5904761905		Motif:P-30_HM	6	69568	98.4963896361		Motif:tRNA-Glu-GAG_	1	5000	95.9692898273		Motif:Gypsy-625_AA-I	1	3265	97.1726190476		Motif:Gypsy-1_AA-I	2	1875	73.2994526974		Motif:I-7B_AAe	1	1197	81.4285714286
Motif:Gypsy-10_DVir-LTR	3	11148	93.2262920221		Motif:tRNA-1_DRe	21	78573	91.8380943476		Motif:RCS5	11	76976	92.1989723197		Motif:SR2	23	46806	84.3336156105		Motif:EnSpm-4_VV	10	28546	90.6222222222		Motif:Mariner3-3_HSal	6	69574	98.5048846099		Motif:tRNA-Arg-AGG	1	5001	95.9884836852		Motif:Gypsy-5-I_CR	1	3266	97.2023809524		Motif:Gypsy-18_SMo-I	2	1877	73.3776387803		Motif:Homo6	1	1198	81.4965986395
Motif:Ginger1-6_HM	3	11151	93.2513798294		Motif:ID	21	78594	91.8626396746		Motif:Ogre-PT3_I-int	11	76987	92.2121477081		Motif:Polinton-1_DGr	23	46829	84.3750563053		Motif:EnSpm-19_HMa	10	28556	90.653968254		Motif:LTR42_MD	6	69580	98.5133795837		Motif:tRNA-Arg-AGA	1	5002	96.0076775432		Motif:Gypsy56-I_DR	1	3267	97.2321428571		Motif:Gypsy-18B_PBa-I	2	1879	73.4558248632		Motif:HERV4_I-int	1	1199	81.5646258503
Motif:ERV6_MD_I-int	3	11154	93.2764676367		Motif:Helitron-4N1_SMo	21	78615	91.8871850016		Motif:Mariner-N5_DR	11	76998	92.2253230965		Motif:Perere-9	23	46852	84.4164970001		Motif:DNA-8-7_DR	10	28566	90.6857142857		Motif:LTR-12C2_Crp	6	69586	98.5218745576		Motif:Transib-6_HM	1	5003	96.0268714012		Motif:Gypsy-55_CGi-I	1	3268	97.2619047619		Motif:Gypsy-16_ST-I	2	1881	73.5340109461		Motif:Helitron-N3_ZM	1	1200	81.6326530612
Motif:ERV24_MD_I-int	3	11157	93.3015554441		Motif:HAL1-3A_ME	21	78636	91.9117303287		Motif:LONGPAL1	11	77009	92.2384984848		Motif:P-1_LHu	23	46875	84.4579376948		Motif:DNA6-1_CQ	10	28576	90.7174603175		Motif:L1_Ele5	6	69592	98.5303695314		Motif:TE-8_CGi	1	5004	96.0460652591		Motif:Gypsy-54_AA-I	1	3269	97.2916666667		Motif:Gypsy-16_Mad-I	2	1883	73.6121970289		Motif:Helitron-N3_DR	1	1201	81.7006802721
Motif:EnSpm-N2_DR	3	11160	93.3266432514		Motif:Gypsy-35_Mad-I	21	78657	91.9362756557		Motif:L1-N6_CQ	11	77020	92.2516738732		Motif:Mariner-33_HM	23	46898	84.4993783896		Motif:DNA3-1_STu	10	28586	90.7492063492		Motif:L1-45_AAe	6	69598	98.5388645052		Motif:Tad1-2_PGr	1	5005	96.0652591171		Motif:Gypsy43-I_DR	1	3270	97.3214285714		Motif:Gypsy-157_ZM-I	2	1885	73.6903831118		Motif:Helitron-N3_CGi	1	1202	81.768707483
Motif:EnSpm6_SB	3	11163	93.3517310587		Motif:Gypsy-30_CGi-I	21	78678	91.9608209827		Motif:Helitron-N2_DR	11	77031	92.2648492616		Motif:Helitron-4N1_SMo	23	46921	84.5408190843		Motif:DNA2-1_DR	10	28596	90.780952381		Motif:Kolobok-2_DR	6	69604	98.547359479		Motif:SZ-64_int-int	1	5006	96.084452975		Motif:Gypsy42-ZM_I-int	1	3271	97.3511904762		Motif:Gypsy14-I_VC	2	1887	73.7685691947		Motif:Helitron-N21_CGi	1	1203	81.8367346939
Motif:EnSpm-5_DR	3	11166	93.376818866		Motif:Copia-10_SMo-I	21	78699	91.9853663098		Motif:Helitron-1_HM	11	77042	92.27802465		Motif:Helitron-1_DR	23	46944	84.5822597791		Motif:tRNAAsnGTT_CB	9	28605	90.8095238095		Motif:Helitron-N2_CGi	6	69610	98.5558544528		Motif:Sola3-1_EmiHux	1	5007	96.103646833		Motif:Gypsy-3_SI-I	1	3272	97.380952381		Motif:Gypsy-14_DAn-I	2	1889	73.8467552776		Motif:Helitron-N1_PBa	1	1204	81.9047619048
Motif:EnSpm-2_FV	3	11169	93.4019066734		Motif:MUDSOLT1	20	78719	92.0087428117		Motif:hAT-42_Lch	11	77053	92.2912000383		Motif:hATm-40_HM	23	46967	84.6237004739		Motif:tRNA-Arg-CGA_	9	28614	90.8380952381		Motif:hAT-2_DR	6	69616	98.5643494266		Motif:SINEC_Fc3	1	5008	96.122840691		Motif:Gypsy-3_PBa-I	1	3273	97.4107142857		Motif:Gypsy-13_DWil-I	2	1891	73.9249413604		Motif:Helitron-9_CGi	1	1205	81.9727891156
Motif:EnSpm-22_SBi	3	11172	93.4269944807		Motif:MuDR-8_Mad	20	78739	92.0321193137		Motif:Gypsy-14_OD-I	11	77064	92.3043754267		Motif:hAT-51_HM	23	46990	84.6651411686		Motif:STOWAWAY50_OS	9	28623	90.8666666667		Motif:Harbinger2-1_NV	6	69622	98.5728444004		Motif:SINEC_Cf	1	5009	96.1420345489		Motif:Gypsy-3_CCO-I	1	3274	97.4404761905		Motif:GYPSOR1_LTR	2	1893	74.0031274433		Motif:Helitron-6_CGi	1	1206	82.0408163265
Motif:EnSpm-1_HM	3	11175	93.452082288		Motif:Mariner-29_AEc	20	78759	92.0554958156		Motif:DNA8-26_DR	11	77075	92.3175508151		Motif:Gypsy-25_PMar-I	23	47013	84.7065818634		Motif:SSU-rRNA_Sme	9	28632	90.8952380952		Motif:Gypsy55-I_AG	6	69628	98.5813393742		Motif:SINEC_c2	1	5010	96.1612284069		Motif:Gypsy-38_DWil-I	1	3275	97.4702380952		Motif:Ginger1-N1_DR	2	1895	74.0813135262		Motif:Helitron-4N1_SMo	1	1207	82.1088435374
Motif:EnSpm-16_ZM	3	11178	93.4771700953		Motif:Mariner-15_SIn	20	78779	92.0788723175		Motif:Crack-8_BF	11	77086	92.3307262035		Motif:DNA-X-5_DR	23	47036	84.7480225582		Motif:Penelope3_XT	9	28641	90.9238095238		Motif:Gypsy-55_CGi-I	6	69634	98.589834348		Motif:SAT_PL	1	5011	96.1804222649		Motif:Gypsy-38_DPu-I	1	3276	97.5		Motif:Erine2c	2	1897	74.1594996091		Motif:Helitron-4_DR	1	1208	82.1768707483
Motif:DNA-TA-4_DR	3	11181	93.5022579027		Motif:hATw-3_HM	20	78799	92.1022488195		Motif:Crack-3_CP	11	77097	92.3439015918		Motif:DNA9-4_CGi	23	47059	84.7894632529		Motif:MuDR-7_GM	9	28650	90.9523809524		Motif:Gypsy-4_SCH-I	6	69640	98.5983293218		Motif:SAT-1_PGr	1	5012	96.1996161228		Motif:Gypsy-37_DAn-I	1	3277	97.5297619048		Motif:EnSpm-9_OS	2	1899	74.2376856919		Motif:Helitron-1_SMo	1	1209	82.2448979592
Motif:DNA8-21_DR	3	11184	93.52734571		Motif:Gypsy-22_DWil-LTR	20	78819	92.1256253214		Motif:XL1723I	10	77107	92.3558792176		Motif:tRNA-1_DRe	22	47081	84.8291021783		Motif:MuDR-21_VV	9	28659	90.980952381		Motif:Gypsy-23-LTR_DR	6	69646	98.6068242956		Motif:Sat-1_CPa	1	5013	96.2188099808		Motif:Gypsy-34_Mad-I	1	3278	97.5595238095		Motif:EnSpm-9_DR	2	1901	74.3158717748		Motif:HEL	1	1210	82.3129251701
Motif:DNA8-10_CGi	3	11187	93.5524335173		Motif:EnSpm-17_ZM	20	78839	92.1490018234		Motif:tRNA-3_DRe	10	77117	92.3678568434		Motif:hAT-25_DR	22	47103	84.8687411038		Motif:hAT-N39_DR	9	28668	91.0095238095		Motif:Gypsy-10_CCO-I	6	69652	98.6153192694		Motif:SAT-19_DR	1	5014	96.2380038388		Motif:Gypsy-33_DAn-LTR	1	3279	97.5892857143		Motif:DNA-TA-4_DR	2	1903	74.3940578577		Motif:hAT-N71_DR	1	1211	82.380952381
Motif:DNA-2-3_DR	3	11190	93.5775213246		Motif:DNA9-4_FV	20	78859	92.1723783253		Motif:Transib-16_HM	10	77127	92.3798344692		Motif:HAL1-1H_Cpo	22	47125	84.9083800292		Motif:hAT-N127_DR	9	28677	91.0380952381		Motif:Eri-2B2_EE	6	69658	98.6238142432		Motif:RMER17A	1	5015	96.2571976967		Motif:Gypsy-32_CGi-I	1	3280	97.619047619		Motif:DNA-9-3N_Mad	2	1905	74.4722439406		Motif:hAT-N36C_DR	1	1212	82.4489795918
Motif:DIRS-35_ACar	3	11193	93.602609132		Motif:DIRS-4_DR	20	78879	92.1957548272		Motif:RLG_scMaximus_1_8-I	10	77137	92.391812095		Motif:Gypsy-1_RP-LTR	22	47147	84.9480189546		Motif:Gypsy-8_DSe-I	9	28686	91.0666666667		Motif:Copia-59_SB-I	6	69664	98.632309217		Motif:RLG_scIvana_1_2-I	1	5016	96.2763915547		Motif:Gypsy-31_PIT-I	1	3281	97.6488095238		Motif:DNA-8-5_DR	2	1907	74.5504300235		Motif:hAT-N35C_DR	1	1213	82.5170068027
Motif:DIRS-21_ACar	3	11196	93.6276969393		Motif:TE-X-4_DR	19	78898	92.2179625041		Motif:Neptune_Hyd	10	77147	92.4037897208		Motif:EnSpm-N1_AT	22	47169	84.98765788		Motif:Gypsy-21_DY-I	9	28695	91.0952380952		Motif:tRNASerTCT_CB	5	69669	98.6393883619		Motif:REP-10_CPB	1	5017	96.2955854127		Motif:Gypsy-31_DEl-I	1	3282	97.6785714286		Motif:DNA-8-3_HM	2	1909	74.6286161063		Motif:hAT-N18_AMi	1	1214	82.5850340136
Motif:DIRS-1_SP	3	11199	93.6527847466		Motif:R5-1_SM	19	78917	92.2401701809		Motif:LTR24_Sar	10	77157	92.4157673466		Motif:EnSpm-16_HM	22	47191	85.0272968055		Motif:EnSpm-N1_DR	9	28704	91.1238095238		Motif:tRNASAT-1_ZM	5	69674	98.6464675067		Motif:R5-2_SM	1	5018	96.3147792706		Motif:Gypsy-30_PSo-I	1	3283	97.7083333333		Motif:DNA2-10_CGi	2	1911	74.7068021892		Motif:HATN15_DR	1	1215	82.6530612245
Motif:Daphne-21_SPu	3	11202	93.6778725539		Motif:P-2_Hrobusta	19	78936	92.2623778578		Motif:L2-16_NVe	10	77167	92.4277449724		Motif:DNA3-13B_CGi	22	47213	85.0669357309		Motif:EnSpm-8_HM	9	28713	91.1523809524		Motif:tRNA-Arg-CGG	5	69679	98.6535466516		Motif:R1C_NLo	1	5019	96.3339731286		Motif:Gypsy-2-I_TA	1	3284	97.7380952381		Motif:DIRS-5_CPB	2	1913	74.7849882721		Motif:hAT-N131_DR	1	1216	82.7210884354
Motif:Daphne-16_HMa	3	11205	93.7029603613		Motif:P-13_HM	19	78955	92.2845855346		Motif:Kiri-6_AAe	10	77177	92.4397225982		Motif:CryptonV-1_DR	22	47235	85.1065746563		Motif:EnSpm-43_SBi	9	28722	91.180952381		Motif:TE7-1_FV	5	69684	98.6606257964		Motif:PRIMA4-int	1	5020	96.3531669866		Motif:Gypsy-27_CQ-I	1	3285	97.7678571429		Motif:Crypton-4_CGi	2	1915	74.863174355		Motif:HATN11_DR	1	1217	82.7891156463
Motif:Coprina_Cc1	3	11208	93.7280481686		Motif:LatiHarb1-N1	19	78974	92.3067932115		Motif:Jockey-5_DVi	10	77187	92.451700224		Motif:CLOUD-7	22	47257	85.1462135817		Motif:EnSpm-3_HV	9	28731	91.2095238095		Motif:Sola2-1_EmiHux	5	69689	98.6677049412		Motif:Poseidon-N5_PM	1	5021	96.3723608445		Motif:Gypsy-26_VV-LTR	1	3286	97.7976190476		Motif:Crack-25_AAe	2	1917	74.9413604378		Motif:hATm-59_HM	1	1218	82.8571428571
Motif:Copia17-NVi_I-int	3	11211	93.7531359759		Motif:ISL2EU-1_CFl	19	78993	92.3290008883		Motif:hAT-4_EPa	10	77197	92.4636778498		Motif:Chapaev-20_HM	22	47279	85.1858525072		Motif:EnSpm-16_DR	9	28740	91.2380952381		Motif:RLTR51A_Mm	5	69694	98.6747840861		Motif:Poseidon-N1_PM	1	5022	96.3915547025		Motif:Gypsy-25-I_NVi	1	3287	97.8273809524		Motif:CR1-42_HM	2	1919	75.0195465207		Motif:hAT-7_SBi	1	1219	82.925170068
Motif:Copia11-VV_LTR	3	11214	93.7782237832		Motif:Gypsy-1_PAb-I	19	79012	92.3512085652		Motif:Gypsy-47_Mad-I	10	77207	92.4756554756		Motif:tRNASerTCT_CB	21	47300	85.2236896632		Motif:DNA-X-17_DR	9	28749	91.2666666667		Motif:Nimb-4_DR	5	69699	98.6818632309		Motif:Poseidon-2B_PM	1	5023	96.4107485605		Motif:Gypsy-22_ADe-I	1	3288	97.8571428571		Motif:Copia-1_ST-LTR	2	1921	75.0977326036		Motif:hAT-5_PTr	1	1220	82.9931972789
Motif:Chapaev-3_HM	3	11217	93.8033115906		Motif:Gypsy-14_RO-I	19	79031	92.373416242		Motif:Gypsy-27_DP-I	10	77217	92.4876331014		Motif:tRNAGlu_CB	21	47321	85.2615268193		Motif:DNA-2-15_DR	9	28758	91.2952380952		Motif:MuDR-7_VV	5	69704	98.6889423758		Motif:Polinton-N1B_NV	1	5024	96.4299424184		Motif:Gypsy21-LTR_Dpse	1	3289	97.8869047619		Motif:Copia-1-I_HS	2	1923	75.1759186865		Motif:hAT-50_HM	1	1221	83.0612244898
Motif:Chapaev-3A_HM	3	11220	93.8283993979		Motif:Polinton-1_SP	18	79049	92.3944550937		Motif:Gypsy-25_PMar-I	10	77227	92.4996107272		Motif:Mariner-14_LCh	21	47342	85.2993639754		Motif:DNA2-10_CGi	9	28767	91.3238095238		Motif:MuDr-1_HV	5	69709	98.6960215206		Motif:Polinton-5_SP	1	5025	96.4491362764		Motif:Gypsy20-LTR_SP	1	3290	97.9166666667		Motif:Copia-1_CMe-I	2	1925	75.2541047694		Motif:HAT-4_Mad	1	1222	83.1292517007
Motif:BEL-50_DRe-LTR	3	11223	93.8534872052		Motif:MuDR-21_VV	18	79067	92.4154939455		Motif:Gypsy-1_PPP-I	10	77237	92.511588353		Motif:L2-27_ACar	21	47363	85.3372011315		Motif:CR1-18_NV	9	28776	91.3523809524		Motif:Mariner-N26_HSal	5	69714	98.7031006654		Motif:Polinton-1_SP	1	5026	96.4683301344		Motif:Gypsy-202_ZM-I	1	3291	97.9464285714		Motif:Copia-1a_VMo-I	2	1927	75.3322908522		Motif:hAT-4_DRh	1	1223	83.1972789116
Motif:BEL1-I_SM	3	11226	93.8785750125		Motif:L2_Plat1i	18	79085	92.4365327972		Motif:Gypsy-133_GM-I	10	77247	92.5235659788		Motif:ISL2EU-N5B_CGi	21	47384	85.3750382876		Motif:CR1-15_HM	9	28785	91.380952381		Motif:LOOPERN3B_DR	5	69719	98.7101798103		Motif:piggyBac-N6_SP	1	5027	96.4875239923		Motif:Gypsy-1-I_DP	1	3292	97.9761904762		Motif:Copia-11_BRa-I	2	1929	75.4104769351		Motif:hAT-42_HM	1	1224	83.2653061224
Motif:ATCopia94_I-int	3	11229	93.9036628199		Motif:Jockey-3_DGri	18	79103	92.457571649		Motif:EqERV-beta1-int	10	77257	92.5355436045		Motif:ISL2EU-1_CFl	21	47405	85.4128754437		Motif:Ambal-3N1_FCy	9	28794	91.4095238095		Motif:L2-8_NVi	5	69724	98.7172589551		Motif:Penelope-1_DR	1	5028	96.5067178503		Motif:Gypsy-1_Cop-I	1	3293	98.005952381		Motif:BMSAT1	2	1931	75.488663018		Motif:hAT-2_PSt	1	1225	83.3333333333
Motif:ATCopia24I	3	11232	93.9287506272		Motif:Helitron-N3_DR	18	79121	92.4786105007		Motif:EnSpm-40_SBi	10	77267	92.5475212303		Motif:Gypsy-6_LCh-I	21	47426	85.4507125998		Motif:Zisupton-3_DR	8	28802	91.4349206349		Motif:L1-67_DR	5	69729	98.7243381		Motif:OSTE15	1	5029	96.5259117083		Motif:Gypsy-1_AM-I	1	3294	98.0357142857		Motif:ATMU10	2	1933	75.5668491009		Motif:hAT-21N2_LMi	1	1226	83.4013605442
Motif:Ves2_ML	2	11234	93.9454758321		Motif:hATa-1_EHux	18	79139	92.4996493525		Motif:DNA-1_CQ	10	77277	92.5594988561		Motif:Gypsy-29_DWil-I	21	47447	85.4885497559		Motif:tRNASAT-1_ZM	8	28810	91.4603174603		Motif:Kiri-35_AAe	5	69734	98.7314172448		Motif:MuDR-5_VV	1	5030	96.5451055662		Motif:Gypsy18-I_CR	1	3295	98.0654761905		Motif:ATENSPM5	2	1935	75.6450351837		Motif:hAT-21_CPB	1	1227	83.4693877551
Motif:Tx1-12_Crp	2	11236	93.962201037		Motif:HAT-4N1_Mad	18	79157	92.5206882042		Motif:Daphne-78_HMa	10	77287	92.5714764819		Motif:Gypsy152B-LTR_DR	21	47468	85.5263869119		Motif:tRNA-Ile-ATT	8	28818	91.4857142857		Motif:Jockey_Ele2	5	69739	98.7384963896		Motif:MuDr-1x_SP	1	5031	96.5642994242		Motif:Gypsy-173_ZM-I	1	3296	98.0952380952		Motif:ATCopia6I	2	1937	75.7232212666		Motif:hAT-1960_Ami	1	1228	83.537414966
Motif:tRNASerTCT_CB	2	11238	93.9789262418		Motif:Harbinger-5_DR	18	79175	92.541727056		Motif:Dada-tY_PMar	10	77297	92.5834541077		Motif:Gypsy-119_AA-LTR	21	47489	85.564224068		Motif:TE-X-7_DR	8	28826	91.5111111111		Motif:Helitron-N3_DR	5	69744	98.7455755345		Motif:MuDR-1_LHu	1	5032	96.5834932821		Motif:Gypsy-159_ZM-I	1	3297	98.125		Motif:ATCopia24I	2	1939	75.8014073495		Motif:hAT-10_XT	1	1229	83.6054421769
Motif:TE-X-7_DR	2	11240	93.9956514467		Motif:Gypsy-8_HMM-LTR	18	79193	92.5627659077		Motif:CR1-7_CGi	10	77307	92.5954317335		Motif:EnSpm-8_DR	21	47510	85.6020612241		Motif:SAT-1_SK	8	28834	91.5365079365		Motif:Helitron-N2_DT	5	69749	98.7526546793		Motif:MERMITEJ	1	5033	96.6026871401		Motif:Gypsy-151_AA-I	1	3298	98.1547619048		Motif:ATCopia20I	2	1941	75.8795934324		Motif:HAT-10_Mad	1	1230	83.6734693878
Motif:TE-X-12_DR	2	11242	94.0123766516		Motif:Gypsy-60_CQ-I	18	79211	92.5838047595		Motif:Copia-3_ES-I	10	77317	92.6074093593		Motif:DNA2-7_DR	21	47531	85.6398983802		Motif:RLTR31D_MM	8	28842	91.5619047619		Motif:hAT-N16_Crp	5	69754	98.7597338242		Motif:MERMITEA	1	5034	96.6218809981		Motif:Gypsy-14_DAn-I	1	3299	98.1845238095		Motif:Zisupton-1_DR	1	1942	75.9186864738		Motif:HarbingerS-3_PI	1	1231	83.7414965986
Motif:TE-5_CGi	2	11244	94.0291018565		Motif:Gypsy-46_Mad-I	18	79229	92.6048436112		Motif:Copia-1_ST-LTR	10	77327	92.6193869851		Motif:TUBE2	20	47551	85.675933767		Motif:MUDRAVI2	8	28850	91.5873015873		Motif:Harbinger-7_PGr	5	69759	98.766812969		Motif:Merlin-1_Aplcal	1	5035	96.641074856		Motif:Gypsy-149_AA-I	1	3300	98.2142857143		Motif:Zator-N1_CGi	1	1943	75.9577795152		Motif:Harbinger-N1_NV	1	1232	83.8095238095
Motif:SSU-rRNA_Tps	2	11246	94.0458270614		Motif:Gypsy-27_VV-I	18	79247	92.6258824629		Motif:Vandal6	9	77336	92.6301668483		Motif:tRNASAT-1_ZM	20	47571	85.7119691537		Motif:MuDr-1_HV	8	28858	91.6126984127		Motif:Harbinger-6_LCh	5	69764	98.7738921138		Motif:Mariner-N10_SIn	1	5036	96.660268714		Motif:Gypsy-137_GM-I	1	3301	98.244047619		Motif:Zator-1_Ngru	1	1944	75.9968725567		Motif:Harbinger-9_PSt	1	1233	83.8775510204
Motif:Sat-1_TSy	2	11248	94.0625522663		Motif:Gypsy-24_DEl-I	18	79265	92.6469213147		Motif:SAT-18_DR	9	77345	92.6409467115		Motif:Sola3-1_AA	20	47591	85.7480045405		Motif:Mariner-9_HM	8	28866	91.6380952381		Motif:Gypsy-64_SB-I	5	69769	98.7809712587		Motif:Mariner-8_DR	1	5037	96.679462572		Motif:Gypsy-12_CSa-LTR	1	3302	98.2738095238		Motif:YOYO_I-int	1	1945	76.0359655981		Motif:Harbinger-6_LCh	1	1234	83.9455782313
Motif:SAT-12_DR	2	11250	94.0792774711		Motif:GYCUME1_LTR	18	79283	92.6679601664		Motif:Proto1-3_NG	9	77354	92.6517265748		Motif:polypurine	20	47611	85.7840399272		Motif:Lx10	8	28874	91.6634920635		Motif:Gypsy-5_DPu-I	5	69774	98.7880504035		Motif:Mariner-6_HM	1	5038	96.6986564299		Motif:Gypsy-10_GM-I	1	3303	98.3035714286		Motif:Waldo-6_AAe	1	1946	76.0750586396		Motif:Harbinger2N_TP	1	1235	84.0136054422
Motif:RT1	2	11252	94.096002676		Motif:RLTR21	17	79300	92.6878301931		Motif:Polinton2_SM	9	77363	92.662506438		Motif:piggyBac-N5_DR	20	47631	85.820075314		Motif:L1-64_DR	8	28882	91.6888888889		Motif:Gypsy-58_SB-I	5	69779	98.7951295484		Motif:Mariner-24_CGi	1	5039	96.7178502879		Motif:Ginger-1_Chlorella_NC64A	1	3304	98.3333333333		Motif:VIHAT3-N1_VV	1	1947	76.114151681		Motif:Harbinger-2_LCh	1	1236	84.0816326531
Motif:R1-N1_CFl	2	11254	94.1127278809		Motif:Mariner-17_AEc	17	79317	92.7077002197		Motif:MULE-1_CapOwc	9	77372	92.6732863012		Motif:MuDR1_HV	20	47651	85.8561107007		Motif:Kolobok-1_DR	8	28890	91.7142857143		Motif:Gypsy-23_DEl-I	5	69784	98.8022086932		Motif:Mariner-18_HSal	1	5040	96.7370441459		Motif:Ginger1-5_HM	1	3305	98.3630952381		Motif:Vandal16	1	1948	76.1532447224		Motif:Harbinger-2F_CPB	1	1237	84.1496598639
Motif:Polinton-7_NVi	2	11256	94.1294530858		Motif:Gypsy-6_DEu-I	17	79334	92.7275702464		Motif:MuDR-18_VV	9	77381	92.6840661644		Motif:CR1-35_HM	20	47671	85.8921460875		Motif:hATw-3_HM	8	28898	91.7396825397		Motif:Gypsy152B-LTR_DR	5	69789	98.809287838		Motif:Mariner-101_HSal	1	5041	96.7562380038		Motif:GGLTR12A	1	3306	98.3928571429		Motif:Utopia-1_AMi	1	1949	76.1923377639		Motif:Harbinger2-1_ES	1	1238	84.2176870748
Motif:Polinton-2_SP	2	11258	94.1461782907		Motif:Gypsy-21_PBa-LTR	17	79351	92.747440273		Motif:MINISAT4_CB	9	77390	92.6948460276		Motif:Chapaev3-1_HR	20	47691	85.9281814742		Motif:HARB-4_Mad	8	28906	91.7650793651		Motif:Gypsy-149_AA-I	5	69794	98.8163669829		Motif:LTR49-int	1	5042	96.7754318618		Motif:ERV-5_AMi-I	1	3307	98.4226190476		Motif:UnaL2	1	1950	76.2314308053		Motif:Harbinger-1_DF	1	1239	84.2857142857
Motif:Polinton-2_DR	2	11260	94.1629034956		Motif:DIRS-1_RO	17	79368	92.7673102997		Motif:MDG1_LTR	9	77399	92.7056258908		Motif:Academ-4_SP	20	47711	85.964216861		Motif:Gypsy82-LTR_Dr	8	28914	91.7904761905		Motif:Gypsy-10_SCH-I	5	69799	98.8234461277		Motif:LTR32_Ttr	1	5043	96.7946257198		Motif:ERV-2B_Crp-LTR	1	3308	98.4523809524		Motif:U6	1	1951	76.2705238468		Motif:HARB-4N1_Mad	1	1240	84.3537414966
Motif:Polinton-1_DAn	2	11262	94.1796287005		Motif:Sola1-2_AC	16	79384	92.7860115012		Motif:Mariner-33_HM	9	77408	92.7164057541		Motif:tRNA-Ile-ATT	19	47730	85.9984504784		Motif:Gypsy-22_DWil-LTR	8	28922	91.8158730159		Motif:GRANDE1_ZD-int	5	69804	98.8305252725		Motif:LTR28B	1	5044	96.8138195777		Motif:ERV1-N3-I_DR	1	3309	98.4821428571		Motif:U5	1	1952	76.3096168882		Motif:HAL1-2a_MD	1	1241	84.4217687075
Motif:Pigibakku	2	11264	94.1963539053		Motif:L1-4_VC	16	79400	92.8047127028		Motif:L2-30_ACar	9	77417	92.7271856173		Motif:tRNA-3_DRe	19	47749	86.0326840958		Motif:Gypsy-226_DR-LTR	8	28930	91.8412698413		Motif:DNA3-10_CGi	5	69809	98.8376044174		Motif:LTR18D_ML	1	5045	96.8330134357		Motif:EnSpm-N1_TA	1	3310	98.5119047619		Motif:U4	1	1953	76.3487099296		Motif:HAL1-1A_Opr	1	1242	84.4897959184
Motif:PiggyBac-1_EmiHux	2	11266	94.2130791102		Motif:Gypsy-11_SI-I	16	79416	92.8234139043		Motif:L1-3_HM	9	77426	92.7379654805		Motif:Polinton-5_SP	19	47768	86.0669177132		Motif:ERV-3_LCh-LTR	8	28938	91.8666666667		Motif:DNA2-7_CGi	5	69814	98.8446835622		Motif:LTR-12D_Crp	1	5046	96.8522072937		Motif:EnSpm-7_FV	1	3311	98.5416666667		Motif:Tx1-4_DR	1	1954	76.3878029711		Motif:Gypsy-9_TA-I	1	1243	84.5578231293
Motif:P-2_HM	2	11268	94.2298043151		Motif:Galileo_DM	16	79432	92.8421151059		Motif:Kiri-35_AAe	9	77435	92.7487453437		Motif:Polinton-4_PBa	19	47787	86.1011513306		Motif:ERV1-N3-I_DR	8	28946	91.8920634921		Motif:CR1_Ele9	5	69819	98.8517627071		Motif:LTR-12A_Crp	1	5047	96.8714011516		Motif:EnSpm-6_FV	1	3312	98.5714285714		Motif:Tx1-3_PM	1	1955	76.4268960125		Motif:Gypsy-9_PR-I	1	1244	84.6258503401
Motif:Nobel_I-int	2	11270	94.24652952		Motif:EnSpm-N11_DR	16	79448	92.8608163074		Motif:hAT-N127_DR	9	77444	92.7595252069		Motif:Polinton-1_PBa	19	47806	86.135384948		Motif:EnSpm-N14_DR	8	28954	91.9174603175		Motif:Copia-56_ZM-I	5	69824	98.8588418519		Motif:LTR127_MD	1	5048	96.8905950096		Motif:EnSpm-4_HV	1	3313	98.6011904762		Motif:Tx1-3_FR	1	1956	76.4659890539		Motif:Gypsy-9_PMar-I	1	1245	84.693877551
Motif:NAVIRTE1	2	11272	94.2632547249		Motif:Vandal13	15	79463	92.8783486839		Motif:hAT-80_HM	9	77453	92.7703050701		Motif:LTR-2_Mad-I	19	47825	86.1696185654		Motif:EnSpm-9_HM	8	28962	91.9428571429		Motif:Copia-42_SB-I	5	69829	98.8659209967		Motif:LSU-rRNA_Mfr	1	5049	96.9097888676		Motif:EnSpm-4_HM	1	3314	98.630952381		Motif:Tx1-3_CGi	1	1957	76.5050820954		Motif:Gypsy-91_ZM-I	1	1246	84.7619047619
Motif:MUDRAVI2	2	11274	94.2799799298		Motif:TRNALysTTT_CB	15	79478	92.8958810604		Motif:hAT-42_HM	9	77462	92.7810849333		Motif:L2_AC_2	19	47844	86.2038521828		Motif:ENSPM-6_ZM	8	28970	91.9682539683		Motif:Copia-17_CQ-I	5	69834	98.8730001416		Motif:LSU-rRNA_Dme	1	5050	96.9289827255		Motif:EnSpm-35_SBi	1	3315	98.6607142857		Motif:Tx1-34_DR	1	1958	76.5441751368		Motif:Gypsy-8_DSe-I	1	1247	84.8299319728
Motif:MUDRAVI1	2	11276	94.2967051346		Motif:tRNA-Gly-GGY	15	79493	92.9134134368		Motif:Gypsy-6_DEu-I	9	77471	92.7918647966		Motif:L2_AC_15	19	47863	86.2380858003		Motif:EnSpm-17_ZM	8	28978	91.9936507937		Motif:CACTA-1_PB	5	69839	98.8800792864		Motif:LOA-8_AAe	1	5051	96.9481765835		Motif:EnSpm-1_TM	1	3316	98.6904761905		Motif:Tx1-33_DR	1	1959	76.5832681783		Motif:Gypsy-8_CQ-I	1	1248	84.8979591837
Motif:MSAT_MG	2	11278	94.3134303395		Motif:tRNA-Asp-GAY	15	79508	92.9309458133		Motif:Gypsy-43_PMar-LTR	9	77480	92.8026446598		Motif:hAT-N47B_DR	19	47882	86.2723194177		Motif:DNA-N4_DR	8	28986	92.019047619		Motif:BEL-50_DRe-LTR	5	69844	98.8871584313		Motif:L2B-4_AAe	1	5052	96.9673704415		Motif:EnSpm1_HV	1	3317	98.7202380952		Motif:Tx1-25_DR	1	1960	76.6223612197		Motif:Gypsy-80-I_ZM	1	1249	84.9659863946
Motif:MERMITE18B	2	11280	94.3301555444		Motif:RLTR20C2_MM	15	79523	92.9484781897		Motif:Gypsy-249_AA-LTR	9	77489	92.813424523		Motif:hATm-19_HM	19	47901	86.3065530351		Motif:DNA8-10_CGi	8	28994	92.0444444444		Motif:BEL-4_DPer-I	5	69849	98.8942375761		Motif:L2-2_NVi	1	5053	96.9865642994		Motif:EnSpm-17_SBi	1	3318	98.75		Motif:Tx1-1_ACar	1	1961	76.6614542611		Motif:Gypsy-78_SB-I	1	1250	85.0340136054
Motif:MdoLTR2-int	2	11282	94.3468807493		Motif:Penelope3_XT	15	79538	92.9660105662		Motif:Gypsy-22_SB-I	9	77498	92.8242043862		Motif:ERV38_MD-int	19	47920	86.3407866525		Motif:DIRS-4N1_DR	8	29002	92.0698412698		Motif:Polinton-2_HM	4	69853	98.899900892		Motif:L1-8_GM	1	5054	97.0057581574		Motif:EnSpm-15_SBi	1	3319	98.7797619048		Motif:Tx1-17_DR	1	1962	76.7005473026		Motif:Gypsy-77-I_ZM	1	1251	85.1020408163
Motif:Mariner-N41_HSal	2	11284	94.3636059542		Motif:MtPH-A6-3-Ia	15	79553	92.9835429426		Motif:Gypsy-16_PBa-LTR	9	77507	92.8349842494		Motif:Eri-2B2_EE	19	47939	86.3750202699		Motif:BEL-10_DWil-I	8	29010	92.0952380952		Motif:Polinton-1_PBa	4	69857	98.9055642078		Motif:L1-45_AAe	1	5055	97.0249520154		Motif:DNA-X-9_NV	1	3320	98.8095238095		Motif:Tx1-16_DR	1	1963	76.739640344		Motif:Gypsy-74_PAb-I	1	1252	85.1700680272
Motif:Mariner-91_HSal	2	11286	94.3803311591		Motif:Gypsy2_MH-I	15	79568	93.0010753191		Motif:EnSpm-9_DR	9	77516	92.8457641126		Motif:EnSpm-12_OS	19	47958	86.4092538873		Motif:tRNALeuCTT_CB	7	29017	92.1174603175		Motif:PCretro3_I-int	4	69861	98.9112275237		Motif:L1-2_VC	1	5056	97.0441458733		Motif:DNA9-3_DR	1	3321	98.8392857143		Motif:Tx1-13_DR	1	1964	76.7787333855		Motif:Gypsy74-I_DR	1	1253	85.2380952381
Motif:Mariner-52N1_HSal	2	11288	94.3970563639		Motif:Gypsy-1_DSe-I	15	79583	93.0186076955		Motif:DIRS-15B_DR	9	77525	92.8565439759		Motif:EnSpm-11_OS	19	47977	86.4434875047		Motif:tRNA-Asp-GAY	7	29024	92.1396825397		Motif:Neptune3_Ren	4	69865	98.9168908396		Motif:L1-15_DR	1	5057	97.0633397313		Motif:DNA-8-3_CR	1	3322	98.869047619		Motif:Tx1-10_CGi	1	1965	76.8178264269		Motif:Gypsy-74_BG-I	1	1254	85.306122449
Motif:Mariner-52_HSal	2	11290	94.4137815688		Motif:Gypsy-10_PBa-LTR	15	79598	93.036140072		Motif:CACTA-1_PB	9	77534	92.8673238391		Motif:DNA-2-18_DR	19	47996	86.4777211221		Motif:Transib-16_HM	7	29031	92.1619047619		Motif:MuDr-3_HM	4	69869	98.9225541555		Motif:L1-13_GM	1	5058	97.0825335893		Motif:DNA8-2C_CGi	1	3323	98.8988095238		Motif:twinID-Spe	1	1966	76.8569194683		Motif:Gypsy-72_MLP-I	1	1255	85.3741496599
Motif:Mariner3-3_HSal	2	11292	94.4305067737		Motif:EnSpm-2_FV	15	79613	93.0536724485		Motif:Ag-Jock-12	9	77543	92.8781037023		Motif:BEL1-I_SM	19	48015	86.5119547396		Motif:Sola2-3_DPu	7	29038	92.1841269841		Motif:MERMITE18D	4	69873	98.9282174713		Motif:Kolobok-N9_DR	1	5059	97.1017274472		Motif:DNA8-12_CGi	1	3324	98.9285714286		Motif:TUB2B	1	1967	76.8960125098		Motif:Gypsy-6_DPu-I	1	1256	85.4421768707
Motif:Mariner-29_HM	2	11294	94.4472319786		Motif:BEL-21_DWil-I	15	79628	93.0712048249		Motif:TSESSEBEII	8	77551	92.8876858029		Motif:Transib-10_HM	18	48033	86.5443865876		Motif:R1-N1_CFl	7	29045	92.2063492063		Motif:LTR-12B_Crp	4	69877	98.9338807872		Motif:Kolobok-10N1_CGi	1	5060	97.1209213052		Motif:DNA6-6_DR	1	3325	98.9583333333		Motif:tRNA-Thr-ACG	1	1968	76.9351055512		Motif:Gypsy-6_DEu-I	1	1257	85.5102040816
Motif:Mariner-21_SIn	2	11296	94.4639571835		Motif:BEL-13_LH-I	15	79643	93.0887372014		Motif:tRNA-Asp-GAY	8	77559	92.8972679036		Motif:RNLTR2d	18	48051	86.5768184357		Motif:Nematis_Cr	7	29052	92.2285714286		Motif:LINE1-40_SBi	4	69881	98.9395441031		Motif:Jockey_Ele2	1	5061	97.1401151631		Motif:DNA4-42B_CGi	1	3326	98.9880952381		Motif:tRNA-Pro-CCG	1	1969	76.9741985927		Motif:Gypsy-67_SB-I	1	1258	85.5782312925
Motif:Mariner-19_HM	2	11298	94.4806823884		Motif:TY3-1p_I-int	14	79657	93.1051007527		Motif:tRNA-Arg-AGA	8	77567	92.9068500042		Motif:RLTR51A_Mm	18	48069	86.6092502838		Motif:MuDR-5_VV	7	29059	92.2507936508		Motif:L2_Plat1i	4	69885	98.9452074189		Motif:Jockey-2_DGri	1	5062	97.1593090211		Motif:DNA3-4_CGi	1	3327	99.0178571429		Motif:tRNAPro_CB	1	1970	77.0132916341		Motif:Gypsy-66_SB-I	1	1259	85.6462585034
Motif:LTR-1_Mad	2	11300	94.4974075932		Motif:SFV1-18_AMi-I	14	79671	93.1214643041		Motif:Transib-2_HM	8	77575	92.9164321048		Motif:Polinton-5_NVi	18	48087	86.6416821319		Motif:MtPH-A6-3-Ia	7	29066	92.273015873		Motif:L2-1_FR1	4	69889	98.9508707348		Motif:ISL2EU-17_CGi	1	5063	97.1785028791		Motif:DNA3-14_CGi	1	3328	99.0476190476		Motif:tRNA-Gly-GGG	1	1971	77.0523846755		Motif:Gypsy-64_AA-I	1	1260	85.7142857143
Motif:LTR11_Ami	2	11302	94.5141327981		Motif:PRIMA4-int	14	79685	93.1378278554		Motif:TIRANT_I-int	8	77583	92.9260142055		Motif:P-34_HM	18	48105	86.6741139799		Motif:LTR24_Sar	7	29073	92.2952380952		Motif:Kiri-9_AAe	4	69893	98.9565340507		Motif:ISFUN1	1	5064	97.197696737		Motif:DNA3-11_Mad	1	3329	99.0773809524		Motif:tRNA-Glu-GAG_	1	1972	77.091477717		Motif:Gypsy-625_AA-I	1	1261	85.7823129252
Motif:LSU-rRNA_Pfa	2	11304	94.530858003		Motif:LSU-rRNA_Hca	14	79699	93.1541914068		Motif:SSU-rRNA_Sce	8	77591	92.9355963061		Motif:MuDR-8_VV	18	48123	86.706545828		Motif:LTR-12D_Crp	7	29080	92.3174603175		Motif:Jockey-5_CQ	4	69897	98.9621973666		Motif:IS3EU-1_DR	1	5065	97.216890595		Motif:DNA3-11_CGi	1	3330	99.1071428571		Motif:tRNACysGCA_CB	1	1973	77.1305707584		Motif:Gypsy-61_PIT-I	1	1262	85.8503401361
Motif:LOOPERN3_DR	2	11306	94.5475832079		Motif:L1-47B_ACar	14	79713	93.1705549582		Motif:Sola1-1_FraCyl	8	77599	92.9451784067		Motif:MuDR-8_Mad	18	48141	86.7389776761		Motif:L1-79_DR	7	29087	92.3396825397		Motif:ISL2EU-8_CGi	4	69901	98.9678606824		Motif:INGA_HV_I-int	1	5066	97.236084453		Motif:DNA30_Lch	1	3331	99.1369047619		Motif:tRNA-Arg-CGG	1	1974	77.1696637998		Motif:Gypsy-60_SB-I	1	1263	85.9183673469
Motif:LOOPERN3B_DR	2	11308	94.5643084128		Motif:Helitron-3N2_PM	14	79727	93.1869185095		Motif:RTEX-27_CGi	8	77607	92.9547605074		Motif:hAT-N36_DR	18	48159	86.7714095242		Motif:ISL2EU-1_CFl	7	29094	92.3619047619		Motif:I-7B_AAe	4	69905	98.9735239983		Motif:I-1_DP	1	5067	97.2552783109		Motif:DIRS-9C_DR	1	3332	99.1666666667		Motif:tRNA-Ala-GCA	1	1975	77.2087568413		Motif:Gypsy-5_PX-I	1	1264	85.9863945578
Motif:LatiHarb1-N3B	2	11310	94.5810336177		Motif:HAT1_DR	14	79741	93.2032820609		Motif:R1_DYa	8	77615	92.964342608		Motif:Gypsy4-I_Dmoj	18	48177	86.8038413722		Motif:HELMET4	7	29101	92.3841269841		Motif:Helitron-N3_PM	4	69909	98.9791873142		Motif:HUCK1-I_ZM	1	5068	97.2744721689		Motif:DIRS-26_XT	1	3333	99.1964285714		Motif:TRIM	1	1976	77.2478498827		Motif:Gypsy5-I_DR	1	1265	86.0544217687
Motif:L1-4_VC	2	11312	94.5977588225		Motif:Gypsy-14_DAn-I	14	79755	93.2196456122		Motif:Polinton-8_NVi	8	77623	92.9739247086		Motif:Ginger1-2_DR	18	48195	86.8362732203		Motif:hAT-16_HM	7	29108	92.4063492063		Motif:Helitron-N18_CGi	4	69913	98.98485063		Motif:Homo6	1	5069	97.2936660269		Motif:Dada-1_CV	1	3334	99.2261904762		Motif:Transib-1_HM	1	1977	77.2869429242		Motif:Gypsy-5_DPu-I	1	1266	86.1224489796
Motif:L1-2_STu	2	11314	94.6144840274		Motif:Gypsy-13_RO-I	14	79769	93.2360091636		Motif:Polinton-7_NVi	8	77631	92.9835068093		Motif:EnSpm-N17_DR	18	48213	86.8687050684		Motif:Harbinger-21_PGr	7	29115	92.4285714286		Motif:Helitron-1_AC	4	69917	98.9905139459		Motif:Homo10	1	5070	97.3128598848		Motif:CVE	1	3335	99.255952381		Motif:TguLTRL2a8	1	1978	77.3260359656		Motif:Gypsy58-I_AG	1	1267	86.1904761905
Motif:Jockey-6_DK	2	11316	94.6312092323		Motif:EnSpm6_SB	14	79783	93.2523727149		Motif:piggyBac-2_CGi	8	77639	92.9930889099		Motif:EnSpm-N10_DR	18	48231	86.9011369165		Motif:HAL1-1D_Tbel	7	29122	92.4507936508		Motif:Gypsy-77-I_ZM	4	69921	98.9961772618		Motif:Helitron-N46_CGi	1	5071	97.3320537428		Motif:CRE2	1	3336	99.2857142857		Motif:TguLTRK1_I	1	1979	77.365129007		Motif:Gypsy57-I_DR	1	1268	86.2585034014
Motif:Jockey-3_DPer	2	11318	94.6479344372		Motif:EnSpm-4_VV	14	79797	93.2687362663		Motif:P-1_LHu	8	77647	93.0026710106		Motif:DNA-8-1_HM	18	48249	86.9335687645		Motif:Gypsy6-LTR_AP	7	29129	92.473015873		Motif:Gypsy-6_LCh-I	4	69925	99.0018405777		Motif:Helitron-N3_ZM	1	5072	97.3512476008		Motif:Crack-27_BF	1	3337	99.3154761905		Motif:TguERV2_LTR1d	1	1980	77.4042220485		Motif:Gypsy-55_CGi-I	1	1269	86.3265306122
Motif:ISL2EU-1_CFl	2	11320	94.6646596421		Motif:DNA2-10_DR	14	79811	93.2850998177		Motif:P-1_DR	8	77655	93.0122531112		Motif:DNA-5-2B_DR	18	48267	86.9660006126		Motif:Gypsy-25_PMar-I	7	29136	92.4952380952		Motif:Gypsy-69_SB-I	4	69929	99.0075038935		Motif:Helitron-N3_PM	1	5073	97.3704414587		Motif:Copia-8_CPu-I	1	3338	99.3452380952		Motif:TE-X-4_DR	1	1981	77.4433150899		Motif:Gypsy50-ZM_I-int	1	1270	86.3945578231
Motif:Hoana5	2	11322	94.681384847		Motif:Athila4C_I-int	14	79825	93.301463369		Motif:OK	8	77663	93.0218352118		Motif:tRNAPheTTC_CB	17	48284	86.9966306913		Motif:Gypsy-10_DVir-LTR	7	29143	92.5174603175		Motif:Gypsy24-I_Dpse	4	69933	99.0131672094		Motif:Helitron-N3_CGi	1	5074	97.3896353167		Motif:Copia-75_Mad-LTR	1	3339	99.375		Motif:TEKAY_ZM-int	1	1982	77.4824081314		Motif:Gypsy-50_PIT-I	1	1271	86.462585034
Motif:HeT-A2_DVi	2	11324	94.6981100518		Motif:NAVIRTE1	13	79838	93.3166580953		Motif:Nimb-4_DR	8	77671	93.0314173125		Motif:RLTR32_Rn	17	48301	87.0272607701		Motif:ERV38_MD-int	7	29150	92.5396825397		Motif:EnSpm-6_FV	4	69937	99.0188305253		Motif:Helitron-N2_DT	1	5075	97.4088291747		Motif:Copia-5_ADe-I	1	3340	99.4047619048		Motif:TE-8_CGi	1	1983	77.5215011728		Motif:Gypsy50-I_DR	1	1272	86.5306122449
Motif:HERVFH21-int	2	11326	94.7148352567		Motif:MuDR-11N_VV	13	79851	93.3318528215		Motif:NDNAX2_CE	8	77679	93.0409994131		Motif:Polinton-4_SP	17	48318	87.0578908488		Motif:EnSpm-7_DR	7	29157	92.5619047619		Motif:EnSpm-1_HM	4	69941	99.0244938411		Motif:Helitron-N2_DR	1	5076	97.4280230326		Motif:Copia-56_SB-I	1	3341	99.4345238095		Motif:TE-3372_Crp	1	1984	77.5605942142		Motif:Gypsy-4_TCa-I	1	1273	86.5986394558
Motif:HELMET3	2	11328	94.7315604616		Motif:LTR-1_Mad	13	79864	93.3470475478		Motif:Mariner-36_HM	8	77687	93.0505815137		Motif:Polinton-1_SP	17	48335	87.0885209276		Motif:EnSpm-22_SBi	7	29164	92.5841269841		Motif:DNA8-2C_CGi	4	69945	99.030157157		Motif:Helitron-N1_PBa	1	5077	97.4472168906		Motif:Copia-47_Mad-LTR	1	3342	99.4642857143		Motif:TE2-4_CR	1	1985	77.5996872557		Motif:Gypsy-46_Mad-I	1	1274	86.6666666667
Motif:Helitron-N3_DT	2	11330	94.7482856665		Motif:LTR-12B_Crp	13	79877	93.3622422741		Motif:LSU-rRNA_Hca	8	77695	93.0601636144		Motif:LSU-rRNA_Ath	17	48352	87.1191510063		Motif:DNA9-5_DR	7	29171	92.6063492063		Motif:DNA-1_FV	4	69949	99.0358204729		Motif:Helitron-N18_CGi	1	5078	97.4664107486		Motif:Copia-42_SB-I	1	3343	99.494047619		Motif:TE-11_NV	1	1986	77.6387802971		Motif:Gypsy-44_Mad-I	1	1275	86.7346938776
Motif:Helitron-N2B_CGi	2	11332	94.7650108714		Motif:LIN4b_SM	13	79890	93.3774370003		Motif:LatiHarb1-2	8	77703	93.069745715		Motif:hAT-N34_DR	17	48369	87.149781085		Motif:DNA-2-18_DR	7	29178	92.6285714286		Motif:DIRS-N1_NV	4	69953	99.0414837888		Motif:Helitron-3_ZM	1	5079	97.4856046065		Motif:Copia-39_Pru-I	1	3344	99.5238095238		Motif:Tc1-15_Xt	1	1987	77.6778733385		Motif:Gypsy-43_BG-I	1	1276	86.8027210884
Motif:Helitron-N1_SP	2	11334	94.7817360763		Motif:L2_AC_2	13	79903	93.3926317266		Motif:L2-22_ACar	8	77711	93.0793278156		Motif:hAT-N107_DR	17	48386	87.1804111638		Motif:Dada-tY_PMar	7	29185	92.6507936508		Motif:DIRS-8_DR	4	69957	99.0471471046		Motif:Helitron-3N3_PM	1	5080	97.5047984645		Motif:Copia2-I_CR	1	3345	99.5535714286		Motif:TAM3_AM	1	1988	77.71696638		Motif:Gypsy-40_SB-I	1	1277	86.8707482993
Motif:Helitron-N1_HSal	2	11336	94.7984612812		Motif:L1-2_STu	13	79916	93.4078264528		Motif:L1-82_DR	8	77719	93.0889099163		Motif:hAT-310_Ami	17	48403	87.2110412425		Motif:ATREP18	7	29192	92.673015873		Motif:DIRS-21_ACar	4	69961	99.0528104205		Motif:HAT-N9_Mad	1	5081	97.5239923225		Motif:Copia-1_SCH-I	1	3346	99.5833333333		Motif:Tad1-9B_BG	1	1989	77.7560594214		Motif:Gypsy-3_SCH-I	1	1278	86.9387755102
Motif:HelitronN-1_DPe	2	11338	94.815186486		Motif:Gypsy-7_PAb-I	13	79929	93.4230211791		Motif:L1-67_DR	8	77727	93.0984920169		Motif:Harbinger-N16_DR	17	48420	87.2416713212		Motif:ATENSPM10	7	29199	92.6952380952		Motif:Dada-1_TN	4	69965	99.0584737364		Motif:hAT-N71_DR	1	5082	97.5431861804		Motif:Copia1-PTR_I-int	1	3347	99.6130952381		Motif:Tad1-73_BG	1	1990	77.7951524629		Motif:Gypsy-3_PBa-I	1	1279	87.0068027211
Motif:Helitron-2_HM	2	11340	94.8319116909		Motif:Gypsy-40_Mad-I	13	79942	93.4382159054		Motif:L1-56_XT	8	77735	93.1080741175		Motif:Harbinger-1_XT	17	48437	87.2723014		Motif:Ag-Jock-1	7	29206	92.7174603175		Motif:Copia-47_Mad-LTR	4	69969	99.0641370522		Motif:hAT-N131_DR	1	5083	97.5623800384		Motif:Copia-1_BRa-I	1	3348	99.6428571429		Motif:Tad1-66B_BG	1	1991	77.8342455043		Motif:Gypsy-38_NVi-LTR	1	1280	87.074829932
Motif:Helitron-1N1_DVir	2	11342	94.8486368958		Motif:Gypsy-13_Mad-I	13	79955	93.4534106316		Motif:L1-31_DR	8	77743	93.1176562182		Motif:HARB-4_Mad	17	48454	87.3029314787		Motif:Academ-4_SP	7	29213	92.7396825397		Motif:CEREBA_HV-int	4	69973	99.0698003681		Motif:hAT-N12_AMi	1	5084	97.5815738964		Motif:BMRP1	1	3349	99.6726190476		Motif:Tad1-60_BG	1	1992	77.8733385457		Motif:Gypsy-38_DPu-I	1	1281	87.1428571429
Motif:Helitron-1_DT	2	11344	94.8653621007		Motif:EnSpm-10_DR	13	79968	93.4686053579		Motif:Kolobok-3_Lch	8	77751	93.1272383188		Motif:HAL1-3A_ME	17	48471	87.3335615574		Motif:TE-5_CGi	6	29219	92.7587301587		Motif:ALPINE1B	4	69977	99.075463684		Motif:hAT-N125_DR	1	5085	97.6007677543		Motif:BHIKHARI-5-I_DR	1	3350	99.7023809524		Motif:Tad1-50_BG	1	1993	77.9124315872		Motif:Gypsy-35_Mad-I	1	1282	87.2108843537
Motif:Helitron-1_AC	2	11346	94.8820873056		Motif:DNA6-4_DR	13	79981	93.4838000842		Motif:Jockey_Ele2	8	77759	93.1368204195		Motif:Gypsy-8_HMM-LTR	17	48488	87.3641916362		Motif:Sola1-2_AC	6	29225	92.7777777778		Motif:TUBE2	3	69980	99.0797111709		Motif:hATa-1_EHux	1	5086	97.6199616123		Motif:BEL-3_Ano-I	1	3351	99.7321428571		Motif:Tad1-48_BG	1	1994	77.9515246286		Motif:Gypsy-33_DPu-I	1	1283	87.2789115646
Motif:hAT-N35C_DR	2	11348	94.8988125105		Motif:tRNA-2_DRe	12	79993	93.4978259853		Motif:Jockey-2_DF	8	77767	93.1464025201		Motif:Gypsy7-I_Dya	17	48505	87.3948217149		Motif:SINEC_old	6	29231	92.7968253968		Motif:tRNA-Thr-ACG	3	69983	99.0839586578		Motif:hAT-5_PTr	1	5087	97.6391554702		Motif:BEL-30_CQ-LTR	1	3352	99.7619047619		Motif:Tad1-1_EP	1	1995	77.9906176701		Motif:Gypsy-32_DP-I	1	1284	87.3469387755
Motif:hAT-N34_DR	2	11350	94.9155377153		Motif:SSU-rRNA_Sce	12	80005	93.5118518865		Motif:hAT-N107_DR	8	77775	93.1559846207		Motif:Gypsy-2_PGr-I	17	48522	87.4254517937		Motif:SAT-12_DR	6	29237	92.8158730159		Motif:tRNA-Pro-CCY	3	69986	99.0882061447		Motif:HAT-4N1_Mad	1	5088	97.6583493282		Motif:BEL-227_AA-I	1	3353	99.7916666667		Motif:TABOR_I-int	1	1996	78.0297107115		Motif:Gypsy-32_ADe-I	1	1285	87.4149659864
Motif:hAT-N16_Crp	2	11352	94.9322629202		Motif:SSU-rRNA_Lvi	12	80017	93.5258777876		Motif:hATm-33_HM	8	77783	93.1655667214		Motif:EnSpm-22_SBi	17	48539	87.4560818724		Motif:RTEX-4_CGi	6	29243	92.8349206349		Motif:tRNAPheTTC_CB	3	69989	99.0924536316		Motif:HAT-4_Mad	1	5089	97.6775431862		Motif:BEL-1-I_XT	1	3354	99.8214285714		Motif:SZ-64_int-int	1	1997	78.0688037529		Motif:Gypsy-31-LTR_DR	1	1286	87.4829931973
Motif:hAT-N127_DR	2	11354	94.9489881251		Motif:SINE_VV	12	80029	93.5399036888		Motif:hATm-19_HM	8	77791	93.175148822		Motif:DongAG	17	48556	87.4867119511		Motif:RTEX-3_NV	6	29249	92.853968254		Motif:RTEX-5_VC	3	69992	99.0967011185		Motif:hAT-3_RC	1	5090	97.6967370441		Motif:BEL-12_CQ-LTR	1	3355	99.8511904762		Motif:SZ-43_LTR	1	1998	78.1078967944		Motif:Gypsy-31_DWil-I	1	1287	87.5510204082
Motif:hATm-54_HM	2	11356	94.96571333		Motif:Poseidon-2B_PM	12	80041	93.55392959		Motif:Gypsy4-I_Dmoj	8	77799	93.1847309226		Motif:DNA9TA1_DR	17	48573	87.5173420299		Motif:RT1	6	29255	92.873015873		Motif:RMER17D2	3	69995	99.1009486054		Motif:hAT-333_Crp	1	5091	97.7159309021		Motif:BEL-10_DBp-I	1	3356	99.880952381		Motif:STOWAWAY50_OS	1	1999	78.1469898358		Motif:Gypsy-31_DEl-I	1	1288	87.619047619
Motif:hATm-40_HM	2	11358	94.9824385349		Motif:Polinton-5_NVi	12	80053	93.5679554911		Motif:Gypsy37-I_AG	8	77807	93.1943130233		Motif:DNA-8-36_DR	17	48590	87.5479721086		Motif:RP5S	6	29261	92.8920634921		Motif:RLTR21	3	69998	99.1051960923		Motif:hAT-2_DR	1	5092	97.7351247601		Motif:ATHAT1	1	3357	99.9107142857		Motif:SSU-rRNA_Sce	1	2000	78.1860828772		Motif:Gypsy-30_ADe-I	1	1289	87.6870748299
Motif:hATm-19_HM	2	11360	94.9991637398		Motif:NERV5_MD_I-int	12	80065	93.5819813923		Motif:Gypsy-172_AA-I	8	77815	93.2038951239		Motif:DNA-8-29_DR	17	48607	87.5786021873		Motif:RIRE1_I-int	6	29267	92.9111111111		Motif:Poseidon-N1_PM	3	70001	99.1094435792		Motif:hAT-21N2_LMi	1	5093	97.754318618		Motif:ATCopia6I	1	3358	99.9404761905		Motif:Sola3-1_CapOwc	1	2001	78.2251759187		Motif:Gypsy-2_Mad-LTR	1	1290	87.7551020408
Motif:hAT-82_HMa	2	11362	95.0158889446		Motif:MuDR-11_GM	12	80077	93.5960072935		Motif:Gypsy-14_XT-I	8	77823	93.2134772245		Motif:P-26_HM	16	48623	87.6074304967		Motif:REP-2_DF	6	29273	92.9301587302		Motif:Polinton-4_SP	3	70004	99.1136910661		Motif:hAT-208_Ami	1	5094	97.773512476		Motif:Ambal-2_FCy	1	3359	99.9702380952		Motif:Sola2-4_HM	1	2002	78.2642689601		Motif:Gypsy-26B_AMi-LTR	1	1291	87.8231292517
Motif:hAT-80_HM	2	11364	95.0326141495		Motif:Mariner-N39_HSal	12	80089	93.6100331946		Motif:ERV1-7_DR-I	8	77831	93.2230593252		Motif:Ngaro1_DR	16	48639	87.6362588061		Motif:Polinton-1_SP	6	29279	92.9492063492		Motif:Polinton-3_SP	3	70007	99.117938553		Motif:hAT-1960_Ami	1	5095	97.792706334		Motif:Ag-R1-6	1	3360	100		Motif:SINE_FR2	1	2003	78.3033620016		Motif:Gypsy-24_DYa-I	1	1292	87.8911564626
Motif:hAT-54_HM	2	11366	95.0493393544		Motif:ISL2EU-3_CFl	12	80101	93.6240590958		Motif:EnSpm-18_SBi	8	77839	93.2326414258		Motif:MUDSOLT1	16	48655	87.6650871155		Motif:P4_AG	6	29285	92.9682539683		Motif:Polinton-1_DGr	3	70010	99.1221860399		Motif:hAT-16N2_LMi	1	5096	97.8119001919							Motif:SINE2_Gav	1	2004	78.342455043		Motif:Gypsy-230_DR-LTR	1	1293	87.9591836735
Motif:hAT-4B_AMi	2	11368	95.0660645593		Motif:hAT-N71_DR	12	80113	93.638084997		Motif:EnSpm-16_SBi	8	77847	93.2422235265		Motif:MuDR-21_VV	16	48671	87.6939154249		Motif:MUDSOLT1	6	29291	92.9873015873		Motif:piggyBac-N2A_XT	3	70013	99.1264335268		Motif:hAT-12_VVi	1	5097	97.8310940499							Motif:SINE2-1_XT	1	2005	78.3815480844		Motif:Gypsy-220_AA-LTR	1	1294	88.0272108844
Motif:hAT-2_DSe	2	11370	95.0827897642		Motif:Gypsy8-SM_I-int	12	80125	93.6521108981		Motif:DNA-X-12_DR	8	77855	93.2518056271		Motif:MOSAT_DR	16	48687	87.7227437343		Motif:MuDR-8_Mad	6	29297	93.0063492063		Motif:OSMAR1	3	70016	99.1306810137		Motif:Harbinger-8_DR	1	5098	97.8502879079							Motif:SINE2-1_SSc	1	2006	78.4206411259		Motif:Gypsy-21_PR-I	1	1295	88.0952380952
Motif:hAT-21_CPB	2	11372	95.0995149691		Motif:Gypsy6-I_Dmoj	12	80137	93.6661367993		Motif:DNA8-9_DR	8	77863	93.2613877277		Motif:MdoERV2a-int	16	48703	87.7515720437		Motif:LTR-1_Mad	6	29303	93.0253968254		Motif:OK	3	70019	99.1349285006		Motif:Harbinger-4C_PSt	1	5099	97.8694817658							Motif:SHALINE12_MT	1	2007	78.4597341673		Motif:Gypsy-21_LH-I	1	1296	88.1632653061
Motif:hAT-13_DR	2	11374	95.1162401739		Motif:Gypsy-53_SB-LTR	12	80149	93.6801627005		Motif:DNA8-10_DR	8	77871	93.2709698284		Motif:Kolobok-3_DR	16	48719	87.7804003531		Motif:L2_Plat1i	6	29309	93.0444444444		Motif:Novosib-3_CR	3	70022	99.1391759875		Motif:Harbinger-4_BF	1	5100	97.8886756238							Motif:SBCopia1_I-int	1	2008	78.4988272088		Motif:Gypsy-20_BD-I	1	1297	88.231292517
Motif:Harbinger2N_TP	2	11376	95.1329653788		Motif:Gypsy-50_DWil-LTR	12	80161	93.6941886016		Motif:DNA-2-32_DR	8	77879	93.280551929		Motif:Kolobok-10N1_CGi	16	48735	87.8092286625		Motif:L2_AC_14	6	29315	93.0634920635		Motif:MUMET1	3	70025	99.1434234744		Motif:Harbinger-2_LCh	1	5101	97.9078694818							Motif:SAT_PL	1	2009	78.5379202502		Motif:Gypsy-1_SCH-I	1	1298	88.2993197279
Motif:Harbinger-2_LCh	2	11378	95.1496905837		Motif:FUGUREP2	12	80173	93.7082145028		Motif:CR1-14_BF	8	77887	93.2901340296		Motif:Helitron-3N1_NVi	16	48751	87.8380569719		Motif:L1-55_XT	6	29321	93.0825396825		Motif:MuDR-N1_ZM	3	70028	99.1476709613		Motif:Harbinger-2_GA	1	5102	97.9270633397							Motif:RTEX-5_VC	1	2010	78.5770132916		Motif:Gypsy-1_PMar-I	1	1299	88.3673469388
Motif:HARB7_ZM	2	11380	95.1664157886		Motif:EnSpm-N10_DR	12	80185	93.7222404039		Motif:Chapaev-3_HM	8	77895	93.2997161303		Motif:hATm-47_HM	16	48767	87.8668852813		Motif:ISL2EU-3N1_CFl	6	29327	93.1015873016		Motif:Mariner-91_HSal	3	70031	99.1519184483		Motif:Harbinger1_AG	1	5103	97.9462571977							Motif:RTEX-23_SK	1	2011	78.6161063331		Motif:Gypsy-1_PD-I	1	1300	88.4353741497
Motif:Gypsy8-I_Dpse	2	11382	95.1831409935		Motif:EnSpm-22_SBi	12	80197	93.7362663051		Motif:BMRP1	8	77903	93.3092982309		Motif:hAT6-2N1_SP	16	48783	87.8957135907		Motif:Helitron-3N3_PM	6	29333	93.1206349206		Motif:LINE1-18_SBi	3	70034	99.1561659352		Motif:HARB-7_ALy	1	5104	97.9654510557							Motif:RTE-5_AMi	1	2012	78.6551993745		Motif:Gypsy-1-I_PI	1	1301	88.5034013605
Motif:Gypsy-8_DSe-I	2	11384	95.1998661984		Motif:Dada-tY_PMar	12	80209	93.7502922063		Motif:Tx1-7_DR	7	77910	93.317682569		Motif:Gypsy-53_SB-LTR	16	48799	87.9245419001		Motif:Helitron-1_PBa	6	29339	93.1396825397		Motif:L1-8_CR	3	70037	99.1604134221		Motif:HARB-4N1_Mad	1	5105	97.9846449136							Motif:RTE-2_BF	1	2013	78.694292416		Motif:Gypsy-1_CQ-I	1	1302	88.5714285714
Motif:Gypsy-5_DWil-LTR	2	11386	95.2165914032		Motif:Copia-5_DPu-I	12	80221	93.7643181074		Motif:Tx1-4_SK	7	77917	93.326066907		Motif:Gypsy-46_Mad-I	16	48815	87.9533702095		Motif:hATw-1_LV	6	29345	93.1587301587		Motif:L1-11_GM	3	70040	99.164660909		Motif:HAL1-1C_Cja	1	5106	98.0038387716							Motif:RTE1_Sar	1	2014	78.7333854574		Motif:Gypsy-1_CCO-I	1	1303	88.6394557823
Motif:Gypsy-35_Mad-I	2	11388	95.2333166081		Motif:Copia-51_PIT-I	12	80233	93.7783440086		Motif:Tx1-25_DR	7	77924	93.3344512451		Motif:Gypsy-210_DR-I	16	48831	87.9821985189		Motif:hAT-N76_DR	6	29351	93.1777777778		Motif:Jockey-9_DPer	3	70043	99.1689083959		Motif:Gypsy-80-I_ZM	1	5107	98.0230326296							Motif:RT2	1	2015	78.7724784988		Motif:Gypsy-1_AC-I	1	1304	88.7074829932
Motif:Gypsy-34_NVi-I	2	11390	95.250041813		Motif:Copia-3_TMe-I	12	80245	93.7923699098		Motif:tRNAGlu_CB	7	77931	93.3428355831		Motif:EnSpm-N1_DR	16	48847	88.0110268283		Motif:hAT-N53_DR	6	29357	93.1968253968		Motif:Jockey-3_DPer	3	70046	99.1731558828		Motif:Gypsy-7_DPer-I	1	5108	98.0422264875							Motif:Ronin3_I-int	1	2016	78.8115715403		Motif:Gypsy-19_SB-I	1	1305	88.7755102041
Motif:Gypsy-23-LTR_DR	2	11392	95.2667670179		Motif:Copia-2_HAE-I	12	80257	93.8063958109		Motif:tRNA-1_DRe	7	77938	93.3512199212		Motif:DNA8-21_DR	16	48863	88.0398551377		Motif:HATN15_DR	6	29363	93.2158730159		Motif:I-4_AC	3	70049	99.1774033697		Motif:Gypsy-6_ES-I	1	5109	98.0614203455							Motif:RNLTR2d	1	2017	78.8506645817		Motif:Gypsy-19_FV-I	1	1306	88.843537415
Motif:Gypsy23-LTR_Dpse	2	11394	95.2834922228		Motif:tRNAGlu_CB	11	80268	93.819252887		Motif:TRAS3_BM	7	77945	93.3596042592		Motif:ACROBAT1	16	48879	88.0686834471		Motif:hAT-68_HM	6	29369	93.2349206349		Motif:Helitron1_AG	3	70052	99.1816508566		Motif:Gypsy68-I_AG	1	5110	98.0806142035							Motif:RN10_I-int	1	2018	78.8897576231		Motif:Gypsy-19_ADe-I	1	1307	88.9115646259
Motif:Gypsy-1_LENY-I	2	11396	95.3002174277		Motif:Polinton-1_DGr	11	80279	93.8321099631		Motif:TE2-4_CR	7	77952	93.3679885973		Motif:Tx1-2_CGi	15	48894	88.0957099872		Motif:hAT-27_HM	6	29375	93.253968254		Motif:hAT-N5_ACar	3	70055	99.1858983435		Motif:Gypsy58-I_AG	1	5111	98.0998080614							Motif:RMER17C2	1	2019	78.9288506646		Motif:Gypsy-185_ZM-I	1	1308	88.9795918367
Motif:Gypsy-18_RO-I	2	11398	95.3169426325		Motif:Penelope-13_HM	11	80290	93.8449670391		Motif:TDD-5	7	77959	93.3763729354		Motif:Sola2-2_LHu	15	48909	88.1227365273		Motif:HAT-10_Mad	6	29381	93.273015873		Motif:hAT-N35C_DR	3	70058	99.1901458304		Motif:Gypsy56-I_DR	1	5112	98.1190019194							Motif:RMER17A-int	1	2020	78.967943706		Motif:Gypsy-169-I_DR	1	1309	89.0476190476
Motif:Gypsy-16_PBa-LTR	2	11400	95.3336678374		Motif:MUDRAVI2	11	80301	93.8578241152		Motif:SSU-rRNA_Sme	7	77966	93.3847572734		Motif:RNLTR15A2	15	48924	88.1497630673		Motif:HAL1-3A_ME	6	29387	93.2920634921		Motif:HAT-4N3_Mad	3	70061	99.1943933173		Motif:Gypsy55-I_AG	1	5113	98.1381957774							Motif:RLTR51A_Mm	1	2021	79.0070367475		Motif:Gypsy-162_DR-I	1	1310	89.1156462585
Motif:Gypsy-13_SMo-LTR	2	11402	95.3503930423		Motif:MuDR-7_GM	11	80312	93.8706811913		Motif:Sagan-1_SLL	7	77973	93.3931416115		Motif:RLTR20C2_MM	15	48939	88.1767896074		Motif:Gypsy-34_NVi-I	6	29393	93.3111111111		Motif:hAT-17B_Croc	3	70064	99.1986408042		Motif:Gypsy-52_Mad-I	1	5114	98.1573896353							Motif:RLG_scTat_7_1-I	1	2022	79.0461297889		Motif:Gypsy-15_DRh-I	1	1311	89.1836734694
Motif:Gypsy-133_GM-I	2	11404	95.3671182472		Motif:Mariner-N6_PM	11	80323	93.8835382673		Motif:RTEX-5_VC	7	77980	93.4015259495		Motif:PRIMA4-int	15	48954	88.2038161475		Motif:Gypsy-22_DY-LTR	6	29399	93.3301587302		Motif:Gypsy-74-I_ZM	3	70067	99.2028882911		Motif:Gypsy51-I_AG	1	5115	98.1765834933							Motif:RLG_scIvana_5_1-LTR	1	2023	79.0852228303		Motif:Gypsy-15_AMi-I	1	1312	89.2517006803
Motif:Gypsy-12_DVir-I	2	11406	95.3838434521		Motif:Mariner-52N1_HSal	11	80334	93.8963953434		Motif:RTEX-15_CGi	7	77987	93.4099102876		Motif:Polinton-1_NVi	15	48969	88.2308426875		Motif:EnSpm-1_HV	6	29405	93.3492063492		Motif:Gypsy-62_BG-LTR	3	70070	99.207135778		Motif:Gypsy-51_GA-LTR	1	5116	98.1957773512							Motif:RLG_scDEL_1_3-I	1	2024	79.1243158718		Motif:Gypsy152B-LTR_DR	1	1313	89.3197278912
Motif:Gyp_I_MT-int	2	11408	95.400568657		Motif:LSU-rRNA_Sce	11	80345	93.9092524195		Motif:POPGY1_I-int	7	77994	93.4182946256		Motif:MuDR-11N_VV	15	48984	88.2578692276		Motif:DNA4-24_CGi	6	29411	93.3682539683		Motif:Gypsy-50_PM-I	3	70073	99.2113832649		Motif:Gypsy-50_PAb-I	1	5117	98.2149712092							Motif:REX1-3_XT	1	2025	79.1634089132		Motif:Gypsy14-LTR_Dpse	1	1314	89.387755102
Motif:GGERVL-C-int	2	11410	95.4172938618		Motif:Helitron-N1_HSal	11	80356	93.9221094955		Motif:Polinton-9_NVi	7	78001	93.4266789637		Motif:Mariner-N6_SIn	15	48999	88.2848957676		Motif:DNA-3_FV	6	29417	93.3873015873		Motif:Gypsy-47_Mad-I	3	70076	99.2156307518		Motif:Gypsy-48_SB-I	1	5118	98.2341650672							Motif:Rex1-29_DRe	1	2026	79.2025019547		Motif:Gypsy-14_DAn-I	1	1315	89.4557823129
Motif:ERV-2C_Crp-LTR	2	11412	95.4340190667		Motif:hAT-N16_Crp	11	80367	93.9349665716		Motif:Polinton-4_SP	7	78008	93.4350633018		Motif:ISL2EU-N1_CGi	15	49014	88.3119223077		Motif:DIRS-5_DR	6	29423	93.4063492063		Motif:Gypsy42-ZM_I-int	3	70079	99.2198782387		Motif:Gypsy-47_CGi-I	1	5119	98.2533589251							Motif:RETROSAT3_I-int	1	2027	79.2415949961		Motif:Gypsy140-I_DR	1	1316	89.5238095238
Motif:Eri-2B2_EE	2	11414	95.4507442716		Motif:Gypsy8-I_Dpse	11	80378	93.9478236477		Motif:Polinton-2_CB	7	78015	93.4434476398		Motif:ISL2EU-17_CGi	15	49029	88.3389488478		Motif:Copia-34_FV-I	6	29429	93.4253968254		Motif:Gypsy-34_NVi-I	3	70082	99.2241257256		Motif:Gypsy-46_DEl-LTR	1	5120	98.2725527831							Motif:RETROSAT2_I-int	1	2028	79.2806880375		Motif:Gypsy13-ZM_I-int	1	1317	89.5918367347
Motif:EnSpm-4_VV	2	11416	95.4674694765		Motif:Gypsy-7_PBa-I	11	80389	93.9606807237		Motif:P-27_HM	7	78022	93.4518319779		Motif:HELMET3	15	49044	88.3659753878		Motif:Copia-17_DPu-I	6	29435	93.4444444444		Motif:Gypsy-29-I_NVi	3	70085	99.2283732125		Motif:Gypsy-40_Mad-I	1	5121	98.2917466411							Motif:RAM4_I-int	1	2029	79.319781079		Motif:Gypsy-13_SMo-LTR	1	1318	89.6598639456
Motif:EnSpm-34_SBi	2	11418	95.4841946814		Motif:Gypsy-6_ST-I	11	80400	93.9735377998		Motif:Outcast	7	78029	93.4602163159		Motif:hATm-54_HM	15	49059	88.3930019279		Motif:Copia-13_LH-I	6	29441	93.4634920635		Motif:Gypsy-23-LTR_NVi	3	70088	99.2326206994		Motif:GYPSY3-I_MT	1	5122	98.310940499							Motif:R2-1_SM	1	2030	79.3588741204		Motif:Gypsy-134_AA-I	1	1319	89.7278911565
Motif:EnSpm2_SB	2	11420	95.5009198863		Motif:Gypsy-38_AMi-I	11	80411	93.9863948759		Motif:MuDR-1_NV	7	78036	93.468600654		Motif:hAT-82_HMa	15	49074	88.420028468		Motif:Copia-113_SB-I	6	29447	93.4825396825		Motif:Gypsy-226_DR-LTR	3	70091	99.2368681863		Motif:Gypsy-39_Mad-LTR	1	5123	98.330134357							Motif:R1-N1_SIn	1	2031	79.3979671618		Motif:Gypsy-130_AA-I	1	1320	89.7959183673
Motif:EnSpm-16_HM	2	11422	95.5176450912		Motif:Gypsy-10_DVir-LTR	11	80422	93.9992519519		Motif:MuDR1_HV	7	78043	93.476984992		Motif:hAT-80_HM	15	49089	88.447055008		Motif:BovB_Ma	6	29453	93.5015873016		Motif:EnSpm-9_OS	3	70094	99.2411156732		Motif:Gypsy-37_PT-I	1	5124	98.349328215							Motif:Proto1-2_NG	1	2032	79.4370602033		Motif:Gypsy-12_DEu-I	1	1321	89.8639455782
Motif:EnSpm-16_DR	2	11424	95.534370296		Motif:ERV-3_LCh-LTR	11	80433	94.012109028		Motif:LatiHarb1-1	7	78050	93.4853693301		Motif:hAT-47_HM	15	49104	88.4740815481		Motif:U5	5	29458	93.5174603175		Motif:ENSPM2_VV	3	70097	99.2453631601		Motif:Gypsy-34_NVi-I	1	5125	98.3685220729							Motif:PRIMA4-int	1	2033	79.4761532447		Motif:Gypsy120-LTR_DR	1	1322	89.9319727891
Motif:DNA-X-17_DR	2	11426	95.5510955009		Motif:ERV1-2-I_Lch	11	80444	94.0249661041		Motif:L1-34_DR	7	78057	93.4937536681		Motif:hAT-21_CPB	15	49119	88.5011080881		Motif:Tx1-3_PM	5	29463	93.5333333333		Motif:EnSpm-22_HMa	3	70100	99.249610647		Motif:Gypsy-31_DEl-I	1	5126	98.3877159309							Motif:POPGY1_I-int	1	2034	79.5152462862		Motif:Gypsy-11_FV-I	1	1323	90
Motif:DNA-8-24_DR	2	11428	95.5678207058		Motif:RT1	10	80454	94.036654355		Motif:Kolobok-2_XT	7	78064	93.5021380062		Motif:Gypsy-226_DR-LTR	15	49134	88.5281346282		Motif:Tx1-11_CGi	5	29468	93.5492063492		Motif:EnSpm-17_SBi	3	70103	99.2538581339		Motif:Gypsy-2_DWil-I	1	5127	98.4069097889							Motif:Polinton-5_NVi	1	2035	79.5543393276		Motif:Gypsy-11_CFl-LTR	1	1324	90.0680272109
Motif:DNA-8-1_HM	2	11430	95.5845459107		Motif:OposCharlie1	10	80464	94.048342606		Motif:Kolobok-2_DR	7	78071	93.5105223443		Motif:EnSpm2_PTr	15	49149	88.5551611683		Motif:tRNA-Ser-TCA_	5	29473	93.5650793651		Motif:EnSpm-17_HM	3	70106	99.2581056208		Motif:Gypsy-2_DFa-I	1	5128	98.4261036468							Motif:Polinton-5_NV	1	2036	79.593432369		Motif:Gypsy-116-LTR_DR	1	1325	90.1360544218
Motif:DNA-3_FV	2	11432	95.6012711156		Motif:Mariner-9_HM	10	80474	94.060030857		Motif:Kiri-15_AAe	7	78078	93.5189066823		Motif:EnSpm-13_ZM	15	49164	88.5821877083		Motif:Transib-N3_AAe	5	29478	93.580952381		Motif:EnSpm12_SB	3	70109	99.2623531077		Motif:Gypsy-29-I_NVi	1	5129	98.4452975048							Motif:Polinton-4_PBa	1	2037	79.6325254105		Motif:Gypsy10-LTR_DR	1	1326	90.2040816327
Motif:DNA3-4_CGi	2	11434	95.6179963205		Motif:Mariner-13_SIn	10	80484	94.071719108		Motif:Kiri-11_AAe	7	78085	93.5272910204		Motif:DNA-X-17_DR	15	49179	88.6092142484		Motif:SSU-rRNA_Lvi	5	29483	93.5968253968		Motif:DNAX-7_AP	3	70112	99.2666005946		Motif:Gypsy-28_Mad-I	1	5130	98.4644913628							Motif:Polinton-4_NV	1	2038	79.6716184519		Motif:Gypsy-10_HMM-I	1	1327	90.2721088435
Motif:DNA2-6_CGi	2	11436	95.6347215253		Motif:LTR2C_Opr	10	80494	94.0834073589		Motif:ISL2EU-1_CFl	7	78092	93.5356753584		Motif:DNA8-10_DR	15	49194	88.6362407885		Motif:Rehavkus-2_HR	5	29488	93.6126984127		Motif:DNA8-12_CGi	3	70115	99.2708480816		Motif:Gypsy-28_ADe-I	1	5131	98.4836852207							Motif:Polinton-1_TC	1	2039	79.7107114934		Motif:Gypsy-10_DVir-LTR	1	1328	90.3401360544
Motif:DNA2-10_DR	2	11438	95.6514467302		Motif:LTR11_Ami	10	80504	94.0950956099		Motif:I-7B_AAe	7	78099	93.5440596965		Motif:Copia11-VV_LTR	15	49209	88.6632673285		Motif:Polinton-8_NVi	5	29493	93.6285714286		Motif:DNA4-6_CGi	3	70118	99.2750955685		Motif:Gypsy-27_PSo-I	1	5132	98.5028790787							Motif:Polinton-1_PBa	1	2040	79.7498045348		Motif:Gypsy-10_DPu-I	1	1329	90.4081632653
Motif:DIRS-36_NV	2	11440	95.6681719351		Motif:IS3EU-4N_DR	10	80514	94.1067838609		Motif:hAT-N75_DR	7	78106	93.5524440345		Motif:CATCH2LTR_DR	15	49224	88.6902938686		Motif:Polinton-5_NVi	5	29498	93.6444444444		Motif:Dada-tY_PMar	3	70121	99.2793430554		Motif:Gypsy-26-I_XT	1	5133	98.5220729367							Motif:Polinton-1_NVi	1	2041	79.7888975762		Motif:Gypsy-10_Crp-I	1	1330	90.4761904762
Motif:Dada-tY_PMar	2	11442	95.68489714		Motif:hAT-82_HMa	10	80524	94.1184721118		Motif:hAT-51_HM	7	78113	93.5608283726		Motif:ARS_EH	15	49239	88.7173204086		Motif:Polinton2_SM	5	29503	93.6603174603		Motif:Copia-7_LBS-I	3	70124	99.2835905423		Motif:Gypsy-26_DYa-I	1	5134	98.5412667946							Motif:Polinton-1_DBp	1	2042	79.8279906177		Motif:Gypsy-10_CQ-I	1	1331	90.5442176871
Motif:Dada-1_TN	2	11444	95.7016223449		Motif:hAT-21_CPB	10	80534	94.1301603628		Motif:HARB-4_Mad	7	78120	93.5692127107		Motif:Tx1-34_DR	14	49253	88.7425451794		Motif:Polinton-1_NVi	5	29508	93.6761904762		Motif:Copia-6_DPu-I	3	70127	99.2878380292		Motif:Gypsy-233_AA-LTR	1	5135	98.5604606526							Motif:Polinton-1_CB	1	2043	79.8670836591		Motif:Gypsy-10_CCO-I	1	1332	90.612244898
Motif:CryptonV-1_HSal	2	11446	95.7183475498		Motif:Gypsy98-LTR_Dr	10	80544	94.1418486138		Motif:Gypsy-6_AEc-LTR	7	78127	93.5775970487		Motif:tRNAPro_CB	14	49267	88.7677699501		Motif:MOSAT-2_DR	5	29513	93.6920634921		Motif:Copia-143_SB-I	3	70130	99.2920855161		Motif:Gypsy-231_DR-LTR	1	5136	98.5796545106							Motif:piggyBac-N6_SP	1	2044	79.9061767005		Motif:Ginger1-5_HM	1	1333	90.6802721088
Motif:CryptonV-1_DR	2	11448	95.7350727546		Motif:Gypsy7-I_Dya	10	80554	94.1535368647		Motif:Gypsy-57_PAb-I	7	78134	93.5859813868		Motif:TE-5B_CGi	14	49281	88.7929947208		Motif:Mariner-21_CGi	5	29518	93.7079365079		Motif:Copia-138_SB-I	3	70133	99.296333003		Motif:Gypsy-21_PBa-LTR	1	5137	98.5988483685							Motif:piggyBac-N1_DWil	1	2045	79.945269742		Motif:FUGUREP2	1	1334	90.7482993197
Motif:Copia-7_TA-I	2	11450	95.7517979595		Motif:Gypsy-7_DFi-I	10	80564	94.1652251157		Motif:Gypsy-40_Mad-I	7	78141	93.5943657248		Motif:STOWAWAY50_OS	14	49295	88.8182194915		Motif:LTR53-int	5	29523	93.7238095238		Motif:Chapaev-6_HM	3	70136	99.3005804899		Motif:Gypsy-1_CMe-I	1	5138	98.6180422265							Motif:piggyBac-2_Lch	1	2046	79.9843627834		Motif:FUGUREP1	1	1335	90.8163265306
Motif:Copia-6_PX-I	2	11452	95.7685231644		Motif:Gypsy-61_DWil-I	10	80574	94.1769133667		Motif:Gypsy-19_SB-I	7	78148	93.6027500629		Motif:RLTR20C1_MM	14	49309	88.8434442623		Motif:LTR42_MD	5	29528	93.7396825397		Motif:CACTA-1_Ccinerea	3	70139	99.3048279768		Motif:Gypsy-172_AA-I	1	5139	98.6372360845							Motif:piggyBac-1_XT	1	2047	80.0234558249		Motif:FATIMA_TM-int	1	1336	90.8843537415
Motif:Copia-1_ST-LTR	2	11454	95.7852483693		Motif:Gypsy-47_AA-I	10	80584	94.1886016177		Motif:Gypsy-13_RO-I	7	78155	93.6111344009		Motif:Polinton-2_SP	14	49323	88.868669033		Motif:L2_AC_15	5	29533	93.7555555556		Motif:BEL-40_DRe-LTR	3	70142	99.3090754637		Motif:Gypsy15-I_SP	1	5140	98.6564299424							Motif:PIF_Harbinger-1_EmiHux	1	2048	80.0625488663		Motif:ERVB5_1-I_MM	1	1337	90.9523809524
Motif:Chapaev-7_HM	2	11456	95.8019735742		Motif:Gypsy-26_VV-I	10	80594	94.2002898686		Motif:EnSpm-4_VV	7	78162	93.619518739		Motif:P4_AG	14	49337	88.8938938037		Motif:L1MC4	5	29538	93.7714285714		Motif:ATHAT1	3	70145	99.3133229506		Motif:Gypsy-15_DRh-I	1	5141	98.6756238004							Motif:Perere-5	1	2049	80.1016419077		Motif:ERV24_MD_I-int	1	1338	91.0204081633
Motif:Chapaev-20_HM	2	11458	95.8186987791		Motif:Gypsy-12_RP-I	10	80604	94.2119781196		Motif:DOC5_DM	7	78169	93.6279030771		Motif:P-11_HM	14	49351	88.9191185744		Motif:L1_AC_8	5	29543	93.7873015873		Motif:Ambal-2_FCy	3	70148	99.3175704375		Motif:Gypsy-14_DAn-I	1	5142	98.6948176583							Motif:Penelope-13_HM	1	2050	80.1407349492		Motif:ERV2-3_STr-I	1	1339	91.0884353741
Motif:CACTA_LP	2	11460	95.8354239839		Motif:ENSPM-6_ZM	10	80614	94.2236663706		Motif:DNA9TA1_DR	7	78176	93.6362874151		Motif:Mariner-N5_HSal	14	49365	88.9443433452		Motif:L1-5_LA	5	29548	93.8031746032		Motif:Z-REP	2	70150	99.3204020954		Motif:Gypsy-12_DWil-I	1	5143	98.7140115163							Motif:P-2_MLP	1	2051	80.1798279906		Motif:ERV23_MD_I-int	1	1340	91.156462585
Motif:BovB_Ma	2	11462	95.8521491888		Motif:EnSpm-4_FV	10	80624	94.2353546215		Motif:DNA8-15_CQ	7	78183	93.6446717532		Motif:HAT-8_Mad	14	49379	88.9695681159		Motif:L1-4_VC	5	29553	93.819047619		Motif:Zisupton-4_DR	2	70152	99.3232337534		Motif:Gypsy10-LTR_SP	1	5144	98.7332053743							Motif:P-26_HM	1	2052	80.2189210321		Motif:ERV2-2_ET-I	1	1341	91.2244897959
Motif:BEL-3_DGri-I	2	11464	95.8688743937		Motif:CR1-91_AAe	10	80634	94.2470428725		Motif:DNA2-7_DR	7	78190	93.6530560912		Motif:hAT-1N1_AC	14	49393	88.9947928866		Motif:ISL2EU-8_CGi	5	29558	93.8349206349		Motif:XILON1_ZM-int	2	70154	99.3260654113		Motif:Gypsy-10_CCO-I	1	5145	98.7523992322							Motif:P-1_PBa	1	2053	80.2580140735		Motif:ERV-1_CPB-LTR	1	1342	91.2925170068
Motif:BEL-13_LH-I	2	11466	95.8855995986		Motif:BEL1-I_SM	10	80644	94.2587311235		Motif:CryptonV-2_CFl	7	78197	93.6614404293		Motif:Harbinger3_DR	14	49407	89.0200176573		Motif:Helitron-2_DVir	5	29563	93.8507936508		Motif:Tx1-11_CGi	2	70156	99.3288970692		Motif:GRANDE1_ZD-int	1	5146	98.7715930902							Motif:P-1_DY	1	2054	80.2971071149		Motif:ERV1-6-I_XT	1	1343	91.3605442177
Motif:ATCopia60_I-int	2	11468	95.9023248035		Motif:tRNASerTCT_CB	9	80653	94.2692505493		Motif:Crack-3_AAe	7	78204	93.6698247673		Motif:Gypsy82-LTR_Dr	14	49421	89.0452424281		Motif:Gypsy7-I_Dya	5	29568	93.8666666667		Motif:tRNA-Pro-CCA	2	70158	99.3317287272		Motif:Ginger-1_Chlorella_NC64A	1	5147	98.7907869482							Motif:OSSAT2	1	2055	80.3362001564		Motif:ERV1-3_FCa-I	1	1344	91.4285714286
Motif:AgaP15	2	11470	95.9190500084		Motif:tRNA-Met-i	9	80662	94.2797699752		Motif:Copia-68_GM-LTR	7	78211	93.6782091054		Motif:Gypsy-52_BG-I	14	49435	89.0704671988		Motif:Gypsy4-SM_I-int	5	29573	93.8825396825		Motif:tRNAGlu_CB	2	70160	99.3345603851		Motif:ERV1-N6-I_DR	1	5148	98.8099808061							Motif:OSMUD1	1	2056	80.3752931978		Motif:ERV1-2-LTR_BT	1	1345	91.4965986395
Motif:ACROBAT1	2	11472	95.9357752132		Motif:tRNA-Ile-ATT	9	80671	94.2902894011		Motif:Copia-53_ST-I	7	78218	93.6865934434		Motif:Gypsy-35_Mad-I	14	49449	89.0956919695		Motif:Gypsy4-I_Dmoj	5	29578	93.8984126984		Motif:tRNA-Arg-AGA	2	70162	99.337392043		Motif:ERV1-2-LTR_BT	1	5149	98.8291746641							Motif:OSLINE1_1	1	2057	80.4143862392		Motif:ERV1-2_FCa-I	1	1346	91.5646258503
Motif:ACCORD_LTR	2	11474	95.9525004181		Motif:TRANSPAC_I-int	9	80680	94.300808827		Motif:Copia11-VV_LTR	7	78225	93.6949777815		Motif:Gypsy-21_PBa-LTR	14	49463	89.1209167402		Motif:Gypsy-1_RP-LTR	5	29583	93.9142857143		Motif:Transib-6_HM	2	70164	99.340223701		Motif:EnSpm-N1_AT	1	5150	98.8483685221							Motif:ONSATB	1	2058	80.4534792807		Motif:ERV1-1-I_XT	1	1347	91.6326530612
Motif:Zisupton-3_DR	1	11475	95.9608630206		Motif:SSU-rRNA_Ath	9	80689	94.3113282528		Motif:ATLINE1_10A	7	78232	93.7033621196		Motif:Gypsy21-I_SP	14	49477	89.146141511		Motif:Gypsy-10_PAb-I	5	29588	93.9301587302		Motif:TE-X-4_DR	2	70166	99.3430553589		Motif:EnSpm-N10_DR	1	5151	98.86756238							Motif:Ogre-PT1_I-int	1	2059	80.4925723221		Motif:ERV1-10_DR-I	1	1348	91.7006802721
Motif:Zator-1N_PM	1	11476	95.969225623		Motif:SINE2-2_SP	9	80698	94.3218476787		Motif:YOYO_I-int	6	78238	93.710548695		Motif:ERV1-N7-I_DR	14	49491	89.1713662817		Motif:GRANDE1_ZD-int	5	29593	93.946031746		Motif:SZ-54D_I-int	2	70168	99.3458870168		Motif:EnSpm-7_STu	1	5152	98.886756238							Motif:Novosib-6_CR	1	2060	80.5316653636		Motif:EnSpm-N37_SBi	1	1349	91.768707483
Motif:Waldo-5_AAe	1	11477	95.9775882255		Motif:Sat-1_TSy	9	80707	94.3323671046		Motif:Tx1-5_CQ	6	78244	93.7177352705		Motif:EnSpm6_SB	14	49505	89.1965910524		Motif:Ginger1-1_DR	5	29598	93.9619047619		Motif:SSU-rRNA_Tps	2	70170	99.3487186748		Motif:EnSpm-41N2_SBi	1	5153	98.905950096							Motif:NonLTR-2_CR	1	2061	80.570758405		Motif:ENSPM_MT	1	1350	91.8367346939
Motif:Vingi-3_Crp	1	11478	95.9859508279		Motif:MuDR-N1_ZM	9	80716	94.3428865305		Motif:Tx1-4_CGi	6	78250	93.724921846		Motif:DNA9-6_DR	14	49519	89.2218158231		Motif:GGERVL-C-int	5	29603	93.9777777778		Motif:SSU-rRNA_Pfa	2	70172	99.3515503327		Motif:ENSPM2_VV	1	5154	98.9251439539							Motif:Nimb-1_DR	1	2062	80.6098514464		Motif:EnSpm-9_HM	1	1351	91.9047619048
Motif:Vandal22	1	11479	95.9943134303		Motif:MuDr-1_HV	9	80725	94.3534059563		Motif:tRNA-Met-i	6	78256	93.7321084215		Motif:DNA-8-24_DR	14	49533	89.2470405939		Motif:ERV6_MD_I-int	5	29608	93.9936507937		Motif:SINE2_Gav	2	70174	99.3543819907		Motif:EnSpm-2_TD	1	5155	98.9443378119							Motif:MYSERV6-int	1	2063	80.6489444879		Motif:EnSpm-7_FV	1	1352	91.9727891156
Motif:Vandal20	1	11480	96.0026760328		Motif:MSAT_MG	9	80734	94.3639253822		Motif:tRNA-Met	6	78262	93.7392949969		Motif:Daphne-16_HMa	14	49547	89.2722653646		Motif:ERV3-1_DNo-I	5	29613	94.0095238095		Motif:SFV1-15_AMi-I	2	70176	99.3572136486		Motif:EnSpm2_PTr	1	5156	98.9635316699							Motif:MurERV4_19-int	1	2064	80.6880375293		Motif:ENSPM6_OS	1	1353	92.0408163265
Motif:Vandal1	1	11481	96.0110386352		Motif:MOSAT_DR	9	80743	94.3744448081		Motif:Transib-3_HM	6	78268	93.7464815724		Motif:Crypton-7_CGi	14	49561	89.2974901353		Motif:EnSpm6_SB	5	29618	94.0253968254		Motif:RTEX-3_NV	2	70178	99.3600453065		Motif:EnSpm-17_SBi	1	5157	98.9827255278							Motif:MUDSOLT1	1	2065	80.7271305708		Motif:EnSpm-4_HM	1	1354	92.1088435374
Motif:UVIR_DV	1	11482	96.0194012377		Motif:Mariner3-3_HSal	9	80752	94.384964234		Motif:RTE1_MT	6	78274	93.7536681479		Motif:Copia2-LTR_VC	14	49575	89.322714906		Motif:EnSpm-10_DR	5	29623	94.0412698413		Motif:RTEX-2_DR	2	70180	99.3628769645		Motif:EnSpm-13_OS	1	5158	99.0019193858							Motif:MUDRAVI2	1	2066	80.7662236122		Motif:EnSpm-3_TA	1	1355	92.1768707483
Motif:U6	1	11483	96.0277638401		Motif:LatiHarb1-N3A	9	80761	94.3954836598		Motif:RLG_scMaximus_2_2-I	6	78280	93.7608547234		Motif:CASAT_HD	14	49589	89.3479396768		Motif:DongAG	5	29628	94.0571428571		Motif:RTE2_ZM	2	70182	99.3657086224		Motif:EnSpm12_SB	1	5159	99.0211132438							Motif:MuDR-6_FV	1	2067	80.8053166536		Motif:EnSpm-3_PGr	1	1356	92.2448979592
Motif:Tx1-45_DR	1	11484	96.0361264425		Motif:L1-79_DR	9	80770	94.4060030857		Motif:R2Sm-A	6	78286	93.7680412989		Motif:Transib-1_HM	13	49602	89.3713626782		Motif:DNA3-4_CGi	5	29633	94.073015873		Motif:RN12_I-int	2	70184	99.3685402803		Motif:DualenCr4	1	5160	99.0403071017							Motif:MuDR-5_VV	1	2068	80.8444096951		Motif:EnSpm-35_SBi	1	1357	92.3129251701
Motif:Tx1-44_DR	1	11485	96.044489045		Motif:HATN15_DR	9	80779	94.4165225116		Motif:R2-1_TSP	6	78292	93.7752278743		Motif:SPMLIKE	13	49615	89.3947856795		Motif:DNA2-7_CGi	5	29638	94.0888888889		Motif:RMER12C	2	70186	99.3713719383		Motif:DNA-X-14_DR	1	5161	99.0595009597							Motif:MuDR-5_STu	1	2069	80.8835027365		Motif:EnSpm-2_TD	1	1358	92.380952381
Motif:TUBE2	1	11486	96.0528516474		Motif:hAT-1_PBa	9	80788	94.4270419374		Motif:Polinton-5_NVi	6	78298	93.7824144498		Motif:RLTR20A4	13	49628	89.4182086809		Motif:DNA2-13_DR	5	29643	94.1047619048		Motif:RMER12	2	70188	99.3742035962		Motif:DNA8-3_CGi	1	5162	99.0786948177							Motif:MuDr-1_HV	1	2070	80.922595778		Motif:EnSpm2_PTr	1	1359	92.4489795918
Motif:TUB1	1	11487	96.0612142499		Motif:Harbinger-2_LCh	9	80797	94.4375613633		Motif:Polinton-1_DK	6	78304	93.7896010253		Motif:Polinton-1_XT	13	49641	89.4416316823		Motif:CR1-X3_Pass	5	29648	94.1206349206		Motif:RLTR17B_Mm	2	70190	99.3770352541		Motif:DNA8-2C_CGi	1	5163	99.0978886756							Motif:MuDR-11B_GM	1	2071	80.9616888194		Motif:EnSpm-2_FV	1	1360	92.5170068027
Motif:tRNA-Gly-GGA	1	11488	96.0695768523		Motif:Gypsy-60_PM-LTR	9	80806	94.4480807892		Motif:MUDSOLT1	6	78310	93.7967876008		Motif:piggyBac-1N1_XT	13	49654	89.4650546837		Motif:Copia-81_ST-I	5	29653	94.1365079365		Motif:RLG_scMaximus_1_3-I	2	70192	99.3798669121		Motif:DNA8-26_DR	1	5164	99.1170825336							Motif:MSAT-1_AAe	1	2072	81.0007818608		Motif:EnSpm-21_HMa	1	1361	92.5850340136
Motif:Transib-6_HM	1	11489	96.0779394548		Motif:Gypsy-23-LTR_DR	9	80815	94.4586002151		Motif:Mariner-31_SM	6	78316	93.8039741762		Motif:MuDR-10_GM	13	49667	89.4884776851		Motif:Copia-79_VV-I	5	29658	94.1523809524		Motif:R2I-2_PI	2	70194	99.38269857		Motif:DNA7-N1_DR	1	5165	99.1362763916							Motif:MOSAT_DR	1	2073	81.0398749023		Motif:EnSpm1_SB	1	1362	92.6530612245
Motif:Transib-1_HM	1	11490	96.0863020572		Motif:Gypsy-12_TA-I	9	80824	94.4691196409		Motif:Mariner-30_HM	6	78322	93.8111607517		Motif:MERMITE18C	13	49680	89.5119006865		Motif:Copia-63_VV-I	5	29663	94.1682539683		Motif:R1_DWi	2	70196	99.3855302279		Motif:DNA30_Lch	1	5166	99.1554702495							Motif:MinoAg1	1	2074	81.0789679437		Motif:EnSpm-1_AA	1	1363	92.7210884354
Motif:Transib-1_CQ	1	11491	96.0946646596		Motif:Gypsy-121_MLP-I	9	80833	94.4796390668		Motif:LTR18B_BT	6	78328	93.8183473272		Motif:LONGPAL1	13	49693	89.5353236879		Motif:Copia-5_HV-I	5	29668	94.1841269841		Motif:Polinton-5_NV	2	70198	99.3883618859		Motif:DNA2-10_DR	1	5167	99.1746641075							Motif:MINIME_DN	1	2075	81.1180609851		Motif:EnSpm-18_SBi	1	1364	92.7891156463
Motif:Transib-16_HM	1	11492	96.1030272621		Motif:Gypsy-115_AA-I	9	80842	94.4901584927		Motif:LTR-14A1_Crp	6	78334	93.8255339027		Motif:Homo10	13	49706	89.5587466892		Motif:Copia-50_PIT-I	5	29673	94.2		Motif:Polinton-1_SPU	2	70200	99.3911935438		Motif:DIRS-8_DR	1	5168	99.1938579655							Motif:MERMITE18E	1	2076	81.1571540266		Motif:EnSpm-11_ZM	1	1365	92.8571428571
Motif:Transib-10_HM	1	11493	96.1113898645		Motif:ERV6B-MD_I-int	9	80851	94.5006779186		Motif:LINE1-41_SBi	6	78340	93.8327204781		Motif:hAT-N127_DR	13	49719	89.5821696906		Motif:Copia-1_HAE-I	5	29678	94.2158730159		Motif:piggyBac-N2_XT	2	70202	99.3940252018		Motif:DIRS-15B_DR	1	5169	99.2130518234							Motif:MER61-int	1	2077	81.196247068		Motif:EnSpm-10N1_DR	1	1366	92.925170068
Motif:TE-X-4_DR	1	11494	96.119752467		Motif:ERV1-1_Gav-I	9	80860	94.5111973444		Motif:L1_Ele5	6	78346	93.8399070536		Motif:hAT-7N2_PM	13	49732	89.605592692		Motif:Copia17-NVi_I-int	5	29683	94.2317460317		Motif:OSTE1	2	70204	99.3968568597		Motif:DIP	1	5170	99.2322456814							Motif:MER41C	1	2078	81.2353401095		Motif:EnSpm-10_DR	1	1367	92.9931972789
Motif:TE-X-1_NVi	1	11495	96.1281150694		Motif:DNA-6-N8_DR	9	80869	94.5217167703		Motif:L1-26_DR	6	78352	93.8470936291		Motif:EnSpm-8_HM	13	49745	89.6290156934		Motif:CASAT_HD	5	29688	94.2476190476		Motif:OSCopia2_I-int	2	70206	99.3996885176		Motif:Daphne-73_HMa	1	5171	99.2514395393							Motif:Mariner-N4C_Crp	1	2079	81.2744331509		Motif:DNA-X-16_DR	1	1368	93.0612244898
Motif:TE7-1_FV	1	11496	96.1364776719		Motif:Coprina_Pc2	9	80878	94.5322361962		Motif:Jockey-15_AAe	6	78358	93.8542802046		Motif:EnSpm-4_VV	13	49758	89.6524386948		Motif:BovB_PMo	5	29693	94.2634920635		Motif:Novosib-1_EmiHux	2	70208	99.4025201756		Motif:Dada-1_GM	1	5172	99.2706333973							Motif:Mariner-5_DY	1	2080	81.3135261923		Motif:DNA-X-12_DR	1	1369	93.1292517007
Motif:TE2c_TP	1	11497	96.1448402743		Motif:Copia-7_ES-I	9	80887	94.542755622		Motif:HSAT6	6	78364	93.8614667801		Motif:EnSpm-3_HV	13	49771	89.6758616962		Motif:BEL1-I_SM	5	29698	94.2793650794		Motif:NonLTR-1_CR	2	70210	99.4053518335		Motif:CVE	1	5173	99.2898272553							Motif:Mariner-52_HSal	1	2081	81.3526192338		Motif:DNA-TA-4_DR	1	1370	93.1972789116
Motif:SZ-29_LTR	1	11498	96.1532028767		Motif:Copia-1_RGl-I	9	80896	94.5532750479		Motif:Helitron-3N3_PM	6	78370	93.8686533555		Motif:EnSpm-2_TA	13	49784	89.6992846976		Motif:tRNA-Val-GTA	4	29702	94.2920634921		Motif:Neptune2_Ren	2	70212	99.4081834914		Motif:Crypton-7_CGi	1	5174	99.3090211132							Motif:Mariner-2_SLL	1	2082	81.3917122752		Motif:DNA9TA1_DR	1	1371	93.2653061224
Motif:SSU-rRNA_Pfa	1	11499	96.1615654792		Motif:Copia-10_ST-I	9	80905	94.5637944738		Motif:hAT-N22_DR	6	78376	93.875839931		Motif:EnSpm-19_HMa	13	49797	89.722707699		Motif:tRNA-Ile-ATA	4	29706	94.3047619048		Motif:MuDR-4_GM	2	70214	99.4110151494		Motif:Crypton-4_CGi	1	5175	99.3282149712							Motif:Mariner-2_DRh	1	2083	81.4308053167		Motif:DNA-8-3_HM	1	1372	93.3333333333
Motif:SSU-rRNA_Hsa	1	11500	96.1699280816		Motif:Caulimovirus-1_GM	9	80914	94.5743138997		Motif:hAT-N1_DEl	6	78382	93.8830265065		Motif:DNA-X-16_DR	13	49810	89.7461307003		Motif:tRNA-Gly-GGA	4	29710	94.3174603175		Motif:MuDR1_HV	2	70216	99.4138468073		Motif:CR1_Ele9	1	5176	99.3474088292							Motif:Mariner-2_CPB	1	2084	81.4698983581		Motif:DNA8-2C_CGi	1	1373	93.4013605442
Motif:Sola2-2_DPu	1	11501	96.1782906841		Motif:Athila7_I-int	9	80923	94.5848333255		Motif:hAT-63_HM	6	78388	93.890213082		Motif:Dada-tA_DR	13	49823	89.7695537017		Motif:TE-X-4_NVi	4	29714	94.3301587302		Motif:MERMITE18F	2	70218	99.4166784652		Motif:CR1-2_CQ	1	5177	99.3666026871							Motif:Mariner-2_ACar	1	2085	81.5089913995		Motif:DNA-8-23_DR	1	1374	93.4693877551
Motif:Sola2-1_SP	1	11502	96.1866532865		Motif:TDR8B	8	80931	94.5941839263		Motif:HAT-4N1_Mad	6	78394	93.8973996574		Motif:Academ-1_SK	13	49836	89.7929767031		Motif:TECTH1	4	29718	94.3428571429		Motif:Mariner-31_HM	2	70220	99.4195101232		Motif:Coprina_Cc1	1	5178	99.3857965451							Motif:Mariner-24_AEc	1	2086	81.548084441		Motif:DNA6-9_CGi	1	1375	93.537414966
Motif:Sola2-1_HM	1	11503	96.1950158889		Motif:SFV1-20_Gav-I	8	80939	94.6035345271		Motif:hAT-1N1_AC	6	78400	93.9045862329		Motif:tRNA-Arg-CGG	12	49848	89.8145979352		Motif:SSU-rRNA_Sce	4	29722	94.3555555556		Motif:Mariner-19_PI	2	70222	99.4223417811		Motif:Copia-9_PSo-I	1	5179	99.4049904031							Motif:Mariner-1_TV	1	2087	81.5871774824		Motif:DNA6-6_DR	1	1376	93.6054421769
Motif:Sola1-5_AP	1	11504	96.2033784914		Motif:SAT-21_DR	8	80947	94.6128851279		Motif:hAT-13_DR	6	78406	93.9117728084		Motif:Transib-N3_AAe	12	49860	89.8362191672		Motif:RLTR32_Rn	4	29726	94.3682539683		Motif:LTR4_Str	2	70224	99.425173439		Motif:Copia-8_PR-I	1	5180	99.424184261							Motif:Mariner-14_SM	1	2088	81.6262705238		Motif:DNA5-4_CGi	1	1377	93.6734693878
Motif:SMAR8	1	11505	96.2117410938		Motif:SAT-1_SK	8	80955	94.6222357286		Motif:Gypsy-9_OD-I	6	78412	93.9189593839		Motif:TE7-1_FV	12	49872	89.8578403993		Motif:Polinton-5_PBa	4	29730	94.380952381		Motif:LTR1A2_ML	2	70226	99.428005097		Motif:Copia-79_Mad-I	1	5181	99.443378119							Motif:Mariner-11_LCh	1	2089	81.6653635653		Motif:DNA3-11_Mad	1	1378	93.7414965986
Motif:Sm1	1	11506	96.2201036963		Motif:POPCOP2_I-int	8	80963	94.6315863294		Motif:Gypsy-54_GM-LTR	6	78418	93.9261459593		Motif:RMER17D	12	49884	89.8794616313		Motif:Polinton-3_PBa	4	29734	94.3936507937		Motif:LTR160B_MD	2	70228	99.4308367549		Motif:Copia-6_PR-I	1	5182	99.462571977							Motif:Mariner-10_PGr	1	2090	81.7044566067		Motif:DNA3-11_CGi	1	1379	93.8095238095
Motif:SHAMUDRAV_MT	1	11507	96.2284662987		Motif:Polinton-9_NVi	8	80971	94.6409369302		Motif:Gypsy-39_CPB-LTR	6	78424	93.9333325348		Motif:RMER12	12	49896	89.9010828634		Motif:Polinton-1_DY	4	29738	94.4063492063		Motif:LTR-12_AMi	2	70230	99.4336684129		Motif:Copia-6_Cfl-I	1	5183	99.4817658349							Motif:LYDIA_I-int	1	2091	81.7435496482		Motif:DNA30_Lch	1	1380	93.8775510204
Motif:SHALINE10_MT	1	11508	96.2368289012		Motif:Polinton-8_NVi	8	80979	94.650287531		Motif:Gypsy-31_DEl-I	6	78430	93.9405191103		Motif:RLG_scMaximus_2_1-I	12	49908	89.9227040954		Motif:piggyBac-21_SM	4	29742	94.419047619		Motif:LSU-rRNA_Ath	2	70232	99.4365000708		Motif:Copia-4_XT-I	1	5184	99.5009596929							Motif:LTR6B_SS	1	2092	81.7826426896		Motif:DNA2-32B_DR	1	1381	93.9455782313
Motif:SAT_PL	1	11509	96.2451915036		Motif:OSTE26	8	80987	94.6596381318		Motif:Gypsy-23_DEl-I	6	78436	93.9477056858		Motif:Polinton-1N1_DR	12	49920	89.9443253275		Motif:P-11_HM	4	29746	94.4317460317		Motif:L2B-4B_AAe	2	70234	99.4393317287		Motif:Copia-4_SMo-I	1	5185	99.5201535509							Motif:LTR66	1	2093	81.821735731		Motif:DNA2-10_DR	1	1382	94.0136054422
Motif:SAT-7_DR	1	11510	96.253554106		Motif:Ogre-MT3_I-int	8	80995	94.6689887325		Motif:Gypsy-120_SB-I	6	78442	93.9548922613		Motif:Nimb-4_DR	12	49932	89.9659465595		Motif:Outcast	4	29750	94.4444444444		Motif:L1-N3_FV	2	70236	99.4421633867		Motif:Copia-4_DGri-I	1	5186	99.5393474088							Motif:LTR44B_MD	1	2094	81.8608287725		Motif:DNA-1-8_DR	1	1383	94.0816326531
Motif:Sat-2_STu	1	11511	96.2619167085		Motif:MuDR-5_STu	8	81003	94.6783393333		Motif:Ginger1-2_DR	6	78448	93.9620788367		Motif:MUDRAVI2	12	49944	89.9875677916		Motif:MuDR-N1_ZM	4	29754	94.4571428571		Motif:L1_AC_8	2	70238	99.4449950446		Motif:Copia-48_ZM-I	1	5187	99.5585412668							Motif:LTR42_MD	1	2095	81.8999218139		Motif:DNA-1-2_DR	1	1384	94.1496598639
Motif:Sagan-10_TMe	1	11512	96.2702793109		Motif:MINISAT7_CB	8	81011	94.6876899341		Motif:Ginger1-11_HM	6	78454	93.9692654122		Motif:Mariner-N5_DR	12	49956	90.0091890236		Motif:MuDR-2_GM	4	29758	94.4698412698		Motif:L1-6_CR	2	70240	99.4478267025		Motif:Copia-2_SPDB-I	1	5188	99.5777351248							Motif:LTR37_Ami	1	2096	81.9390148554		Motif:DIRS-7_XT	1	1385	94.2176870748
Motif:RTEX-7_SK	1	11513	96.2786419134		Motif:MINISAT4_CB	8	81019	94.6970405349		Motif:EnSpm-N2_DR	6	78460	93.9764519877		Motif:Mariner-9_HM	12	49968	90.0308102557		Motif:MuDR-2_FV	4	29762	94.4825396825		Motif:L1-47B_ACar	2	70242	99.4506583605		Motif:Copia-1-I_HS	1	5189	99.5969289827							Motif:LTR-16_Mad	1	2097	81.9781078968		Motif:DIRS-4_DR	1	1386	94.2857142857
Motif:RTEX-2_DR	1	11514	96.2870045158		Motif:Mariner-14_SIn	8	81027	94.7063911356		Motif:EnSpm-9_OS	6	78466	93.9836385632		Motif:Mariner-18_HSal	12	49980	90.0524314877		Motif:MdoLTR2-int	4	29766	94.4952380952		Motif:Jockey-5_DVi	2	70244	99.4534900184		Motif:Copia1-I_CR	1	5190	99.6161228407							Motif:LSU-rRNA_Pfa	1	2098	82.0172009382		Motif:DIRS-3_DR	1	1387	94.3537414966
Motif:RTEX-1_CR	1	11515	96.2953671182		Motif:LOOPERN3_DR	8	81035	94.7157417364		Motif:EnSpm-1_TM	6	78472	93.9908251386		Motif:L2-17_NV	12	49992	90.0740527198		Motif:LatiHarb1-N3B	4	29770	94.5079365079		Motif:ISL2EU-N5B_CGi	2	70246	99.4563216763		Motif:Copia-1_ES-I	1	5191	99.6353166987							Motif:LSU-rRNA_Hsa	1	2099	82.0562939797		Motif:DANIELA_TM-int	1	1388	94.4217687075
Motif:RTEX-17_CGi	1	11516	96.3037297207		Motif:L2-12b_Lch	8	81043	94.7250923372		Motif:EnSpm-1_TA	6	78478	93.9980117141		Motif:L1-65_ACar	12	50004	90.0956739518		Motif:L1_Mdo4	4	29774	94.5206349206		Motif:ISL2EU-1_CFl	2	70248	99.4591533343		Motif:Copia-18_MLP-I	1	5192	99.6545105566							Motif:LSU-rRNA_Hca	1	2100	82.0953870211		Motif:Dada-U6_SS	1	1389	94.4897959184
Motif:RTEX-14_SK	1	11517	96.3120923231		Motif:Helitron-3N1_NVi	8	81051	94.734442938		Motif:EnSpm-1_NV	6	78484	94.0051982896		Motif:Kiri-35_AAe	12	50016	90.1172951839		Motif:ISL2EU-17_CGi	4	29778	94.5333333333		Motif:Hoana5	2	70250	99.4619849922		Motif:Copia-16_PAb-I	1	5193	99.6737044146							Motif:LSU-rRNA_Cel	1	2101	82.1344800625		Motif:CVE	1	1390	94.5578231293
Motif:RTE-9_SP	1	11518	96.3204549256		Motif:Helitron-2_DVir	8	81059	94.7437935387		Motif:EnSpm1n_AT	6	78490	94.0123848651		Motif:hAT-N68_DR	12	50028	90.1389164159		Motif:Helitron-3N1_NVi	4	29782	94.546031746		Motif:Helitron-N2_DR	2	70252	99.4648166501		Motif:Copia-12_GM-LTR	1	5194	99.6928982726							Motif:LSU-rRNA_Ath	1	2102	82.173573104		Motif:CSP2096	1	1391	94.6258503401
Motif:RTE-7_PPac	1	11519	96.328817528		Motif:Helitron-1B_SBi	8	81067	94.7531441395		Motif:EnSpm-1_HV	6	78496	94.0195714405		Motif:hAT-N36C_DR	12	50040	90.160537648		Motif:hAT-N31_DR	4	29786	94.5587301587		Motif:Helitron-N14_SBi	2	70254	99.4676483081		Motif:Chapaev-6_HM	1	5195	99.7120921305							Motif:LOA-8_AAe	1	2103	82.2126661454		Motif:CSINE3A	1	1392	94.693877551
Motif:RTE-1_DBi	1	11520	96.3371801305		Motif:hAT-N22_DR	8	81075	94.7624947403		Motif:EnSpm-1_DDi	6	78502	94.026758016		Motif:hATm-12_HM	12	50052	90.18215888		Motif:hATm-40_HM	4	29790	94.5714285714		Motif:hAT-N70_DR	2	70256	99.470479966		Motif:CATCH2LTR_DR	1	5196	99.7312859885							Motif:LINEX-2_DR	1	2104	82.2517591869		Motif:CSINE2	1	1393	94.7619047619
Motif:RLTR45-int	1	11521	96.3455427329		Motif:hAT-27_HM	8	81083	94.7718453411		Motif:EnSpm-17_ZM	6	78508	94.0339445915		Motif:Gypsy-13_CFl-I	12	50064	90.2037801121		Motif:hATm-12_HM	4	29794	94.5841269841		Motif:hAT-N34_DR	2	70258	99.473311624		Motif:BTLTR1J1	1	5197	99.7504798464							Motif:LINE1-55_ZM	1	2105	82.2908522283		Motif:CryptonV-2_DR	1	1394	94.8299319728
Motif:RLTR22_Mur	1	11522	96.3539053353		Motif:Gypsy-6_PIT-I	8	81091	94.7811959418		Motif:EnSpm-14_HM	6	78514	94.041131167		Motif:DNA8-12_CGi	12	50076	90.2254013441		Motif:hAT-5_GM	4	29798	94.5968253968		Motif:hAT-80_HM	2	70260	99.4761432819		Motif:BTLTR1E	1	5198	99.7696737044							Motif:LINE1-14_SBi	1	2106	82.3299452697		Motif:CryptonS-1_PI	1	1395	94.8979591837
Motif:RLTR20A3_MM	1	11523	96.3622679378		Motif:Gypsy-69_MLP-I	8	81099	94.7905465426		Motif:DNA3-4_CGi	6	78520	94.0483177425		Motif:DNA-2-24B_DR	12	50088	90.2470225762		Motif:hAT1_Laf	4	29802	94.6095238095		Motif:hAT-47_HM	2	70262	99.4789749398		Motif:BR1_CP	1	5199	99.7888675624							Motif:L2_AC_11	1	2107	82.3690383112		Motif:CryptonF-2_ACap	1	1396	94.9659863946
Motif:RLG_scMaximus_1_4-I	1	11524	96.3706305402		Motif:Gypsy-5_DBp-I	8	81107	94.7998971434		Motif:DNA-2-24_DR	6	78526	94.0555043179		Motif:Daphne-38_HMa	12	50100	90.2686438082		Motif:Harbinger-2_XT	4	29806	94.6222222222		Motif:hAT-1_EHux	2	70264	99.4818065978		Motif:BEL-50_DRe-LTR	1	5200	99.8080614203							Motif:L2-41_DRe	1	2108	82.4081313526		Motif:Crypton-7_CGi	1	1397	95.0340136054
Motif:RLG_scDEL_1_1-I	1	11525	96.3789931427		Motif:Gypsy56-I_DR	8	81115	94.8092477442		Motif:DNA-1-2_DR	6	78532	94.0626908934		Motif:Crypton-4_CGi	12	50112	90.2902650403		Motif:Harbinger2N_TP	4	29810	94.6349206349		Motif:hAT-10_XT	2	70266	99.4846382557		Motif:BEL-30_CQ-LTR	1	5201	99.8272552783							Motif:L1P2	1	2109	82.4472243941		Motif:CR1-2B_CPB	1	1398	95.1020408163
Motif:REX1-1_AFC	1	11526	96.3873557451		Motif:Gypsy-3_TMe-I	8	81123	94.8185983449		Motif:DIRS-9_Lch	6	78538	94.0698774689		Motif:Crack-2_SP	12	50124	90.3118862723		Motif:Gypsy-I_MT	4	29814	94.6476190476		Motif:Harbinger-4_CGi	2	70268	99.4874699136		Motif:BEL-2-I_NVi	1	5202	99.8464491363							Motif:L1P1	1	2110	82.4863174355		Motif:Coprina_Cc1	1	1399	95.1700680272
Motif:REP-3_CPB	1	11527	96.3957183475		Motif:Gypsy-3_RP-I	8	81131	94.8279489457		Motif:DIRS-6_DR	6	78544	94.0770640444		Motif:CR1-13_NV	12	50136	90.3335075044		Motif:Gypsy-92_ZM-I	4	29818	94.6603174603		Motif:Harbinger1_AG	2	70270	99.4903015716		Motif:BEL-12_CQ-LTR	1	5203	99.8656429942							Motif:L1-N6_CQ	1	2111	82.5254104769		Motif:Copia-9_PIT-I	1	1400	95.2380952381
Motif:REP-1_CQ	1	11528	96.40408095		Motif:Gypsy-24_SB-I	8	81139	94.8372995465		Motif:Crack-22_AAe	6	78550	94.0842506198		Motif:ATCopia59_I-int	12	50148	90.3551287364		Motif:Gypsy-6_AEc-I	4	29822	94.673015873		Motif:HAL1-3_ME	2	70272	99.4931332295		Motif:ATMU10	1	5204	99.8848368522							Motif:L1_Ele9	1	2112	82.5645035184		Motif:Copia-8_FV-I	1	1401	95.306122449
Motif:Rehavkus-2_HR	1	11529	96.4124435524		Motif:Gypsy-16_DEl-I	8	81147	94.8466501473		Motif:CR1-9_CGi	6	78556	94.0914371953		Motif:tRNA-Cys-TGY	11	50159	90.3749481991		Motif:Gypsy-14_DAn-I	4	29826	94.6857142857		Motif:Gypsy-91_SB-I	2	70274	99.4959648874		Motif:ATHAT1	1	5205	99.9040307102							Motif:L1_Canis2	1	2113	82.6035965598		Motif:Copia-8_CPu-I	1	1402	95.3741496599
Motif:R5-1_SM	1	11530	96.4208061549		Motif:Gypsy-10_PAb-I	8	81155	94.856000748		Motif:CR1-73_AAe	6	78562	94.0986237708		Motif:RTEX-26_SK	11	50170	90.3947676618		Motif:GGERVL-B-int	4	29830	94.6984126984		Motif:Gypsy-8-I_CR	2	70276	99.4987965454		Motif:ATCopia59_I-int	1	5206	99.9232245681							Motif:L1_Canid_	1	2114	82.6426896013		Motif:Copia-87_SB-I	1	1403	95.4421768707
Motif:R1_DSi	1	11531	96.4291687573		Motif:ERV1-1_SSc-I	8	81163	94.8653513488		Motif:CR1-35_HM	6	78568	94.1058103463		Motif:Polinton-3_TC	11	50181	90.4145871246		Motif:ERV1-N7-I_DR	4	29834	94.7111111111		Motif:Gypsy81-I_Dr	2	70278	99.5016282033		Motif:ATCopia28_I-int	1	5207	99.9424184261							Motif:L1_BT	1	2115	82.6817826427		Motif:Copia-80_BRa-I	1	1404	95.5102040816
Motif:R1-2_PBa	1	11532	96.4375313598		Motif:EnSpm-34_SBi	8	81171	94.8747019496		Motif:CR1-31_HM	6	78574	94.1129969218		Motif:MinoAg1	11	50192	90.4344065873		Motif:ERV1-4-EC_I-int	4	29838	94.7238095238		Motif:Gypsy-71_PAb-I	2	70280	99.5044598612		Motif:Academ-1_SP	1	5208	99.9616122841							Motif:L1-9_XT	1	2116	82.7208756841		Motif:Copia-7_AG-I	1	1405	95.5782312925
Motif:POPCOP1_LTR	1	11533	96.4458939622		Motif:ENSPM2_VV	8	81179	94.8840525504		Motif:Copia4_LTR_MT	6	78580	94.1201834972		Motif:Mariner-38B_SIn	11	50203	90.45422605		Motif:ERV1-2-I_Lch	4	29842	94.7365079365		Motif:Gypsy51-I_AG	2	70282	99.5072915192		Motif:Academ-1_SK	1	5209	99.980806142							Motif:L1-90_DR	1	2117	82.7599687256		Motif:Copia-69_SB-I	1	1406	95.6462585034
Motif:polypyrimidine	1	11534	96.4542565646		Motif:EnSpm-18_HMa	8	81187	94.8934031512		Motif:Copia-46_VV-I	6	78586	94.1273700727		Motif:LTR66	11	50214	90.4740455127		Motif:EnSpm-5_VV	4	29846	94.7492063492		Motif:Gypsy50-I_DR	2	70284	99.5101231771		Motif:5S_DM	1	5210	100							Motif:L1-87_ACar	1	2118	82.799061767		Motif:Copia-68_MLP-I	1	1407	95.7142857143
Motif:Polinton-8_NVi	1	11535	96.4626191671		Motif:DNA-11_CGi	8	81195	94.9027537519		Motif:Copia-37_PX-I	6	78592	94.1345566482		Motif:LTR18F_ML	11	50225	90.4938649754		Motif:EnSpm-4_FV	4	29850	94.7619047619		Motif:Gypsy47-I_DR	2	70286	99.5129548351												Motif:L1-80_ACar	1	2119	82.8381548084		Motif:Copia-68_BG-I	1	1408	95.7823129252
Motif:Polinton-3_PBa	1	11536	96.4709817695		Motif:DIRS-6_DR	8	81203	94.9121043527		Motif:Copia-33_GM-I	6	78598	94.1417432237		Motif:LIMPET1	11	50236	90.5136844381		Motif:DNA6-4_DR	4	29854	94.7746031746		Motif:Gypsy-43_SB-I	2	70288	99.515786493												Motif:L1-74_ACar	1	2120	82.8772478499		Motif:Copia-66_ST-I	1	1409	95.8503401361
Motif:Polinton-2_HM	1	11537	96.479344372		Motif:CryptonV-1_HSal	8	81211	94.9214549535		Motif:Chapaev-3B_HM	6	78604	94.1489297991		Motif:L1A-2_MD	11	50247	90.5335039008		Motif:DNA4-42B_CGi	4	29858	94.7873015873		Motif:Gypsy-3_AM-I	2	70290	99.5186181509												Motif:L1-6_Mad	1	2121	82.9163408913		Motif:Copia-60_SB-I	1	1410	95.9183673469
Motif:Polinton-1_SPU	1	11538	96.4877069744		Motif:Copia-58_BG-I	8	81219	94.9308055543		Motif:Chapaev-3A_HM	6	78610	94.1561163746		Motif:L1-64_DR	11	50258	90.5533233635		Motif:DIRS-7_DR	4	29862	94.8		Motif:Gypsy-2_PGr-I	2	70292	99.5214498089												Motif:L1-65_DR	1	2122	82.9554339328		Motif:Copia-5_TA-I	1	1411	95.9863945578
Motif:Polinton-1_NVi	1	11539	96.4960695769		Motif:Copia-33_GM-I	8	81227	94.940156155		Motif:Chapaev3-1_DA	6	78616	94.1633029501		Motif:L1-42_ACar	11	50269	90.5731428263		Motif:DIRS-4N3_DR	4	29866	94.8126984127		Motif:Gypsy2-I_AG	2	70294	99.5242814668												Motif:L1-65_ACar	1	2123	82.9945269742		Motif:Copia-58_BG-I	1	1412	96.0544217687
Motif:Polinton-1_CGi	1	11540	96.5044321793		Motif:Copia-1_ST-LTR	8	81235	94.9495067558		Motif:ATGP2NLTR	6	78622	94.1704895256		Motif:L1-15_DR	11	50280	90.592962289		Motif:DINOLT1	4	29870	94.8253968254		Motif:Gypsy-25_PMar-I	2	70296	99.5271131247												Motif:L1-59_DR	1	2124	83.0336200156		Motif:Copia-56_SB-I	1	1413	96.1224489796
Motif:Polinton-1_AMi	1	11541	96.5127947817		Motif:BEL-10_DEl-I	8	81243	94.9588573566		Motif:Zisupton-4_DR	5	78627	94.1764783385		Motif:hAT-N145_DR	11	50291	90.6127817517		Motif:Crack-2_SP	4	29874	94.8380952381		Motif:Gypsy-24_PM-I	2	70298	99.5299447827												Motif:L1-58_ACar	1	2125	83.0727130571		Motif:Copia-52_ZM-I	1	1414	96.1904761905
Motif:piggyBac-N5_DR	1	11542	96.5211573842		Motif:tRNAPro_CB	7	81250	94.9670391323		Motif:Zator-1N_PM	5	78632	94.1824671514		Motif:hAT-N10_ACar	11	50302	90.6326012144		Motif:CR1_Ele9	4	29878	94.8507936508		Motif:Gypsy-21_PSo-I	2	70300	99.5327764406												Motif:L1-55_XT	1	2126	83.1118060985		Motif:Copia-50_SB-I	1	1415	96.2585034014
Motif:piggyBac-4_SM	1	11543	96.5295199866		Motif:tRNA-Ala-GCY	7	81257	94.9752209079		Motif:Vingi-4_SPur	5	78637	94.1884559643		Motif:hAT-27_HM	11	50313	90.6524206771		Motif:CR1-64_HM	4	29882	94.8634920635		Motif:Gypsy-20_LBS-I	2	70302	99.5356080985												Motif:L1-51_ACar	1	2127	83.15089914		Motif:Copia-4_MLP-I	1	1416	96.3265306122
Motif:piggyBac-2_XT	1	11544	96.5378825891		Motif:RETROSAT5_I-int	7	81264	94.9834026836		Motif:Tx1-5_PM	5	78642	94.1944447772		Motif:Gypsy-43_DWil-I	11	50324	90.6722401398		Motif:Copia-7_TA-I	4	29886	94.8761904762		Motif:Gypsy-19_SMo-I	2	70304	99.5384397565												Motif:L1-50_DR	1	2128	83.1899921814		Motif:Copia4-I_VC	1	1417	96.3945578231
Motif:piggyBac-1_AMi	1	11545	96.5462451915		Motif:R1-N1_CFl	7	81271	94.9915844593		Motif:Tx1-19_SK	5	78647	94.2004335901		Motif:Gypsy-38_DWil-I	11	50335	90.6920596025		Motif:Copia-7_CFl-I	4	29890	94.8888888889		Motif:Gypsy-16_PBa-LTR	2	70306	99.5412714144												Motif:L1-4_VC	1	2129	83.2290852228		Motif:Copia-47_GM-I	1	1418	96.462585034
Motif:Penelope-8_ACar	1	11546	96.5546077939		Motif:R1D_NVi	7	81278	94.999766235		Motif:tRNAGlyGGC_CB	5	78652	94.206422403		Motif:GYCUME1_LTR	11	50346	90.7118790652		Motif:Copia6-ZM_I-int	4	29894	94.9015873016		Motif:Gypsy-15_PBa-I	2	70308	99.5441030723												Motif:L1-42_ACar	1	2130	83.2681782643		Motif:Copia-3_PPa-I	1	1419	96.5306122449
Motif:Penelope1D_XT	1	11547	96.5629703964		Motif:PIGY-I_PS	7	81285	95.0079480107		Motif:Transib-10_HM	5	78657	94.2124112158		Motif:ERV1-4-EC_I-int	11	50357	90.731698528		Motif:Copia5-PTR_I-int	4	29898	94.9142857143		Motif:Gypsy-15_DRh-I	2	70310	99.5469347303												Motif:L1-3_Mad	1	2131	83.3072713057		Motif:Copia-3_ADe-I	1	1420	96.5986394558
Motif:Penelope-1_Crp	1	11548	96.5713329988		Motif:MINISAT3_CB	7	81292	95.0161297863		Motif:TART-A	5	78662	94.2184000287		Motif:EnSpm-9_HM	11	50368	90.7515179907		Motif:Copia-2_ST-I	4	29902	94.926984127		Motif:Gypsy-120_SB-I	2	70312	99.5497663882												Motif:L1-2_STu	1	2132	83.3463643471		Motif:Copia35-PTR_I-int	1	1421	96.6666666667
Motif:Penelope-13_HM	1	11549	96.5796956013		Motif:LatiHarb1-N3B	7	81299	95.024311562		Motif:Tad1-58_BG	5	78667	94.2243888416		Motif:EnSpm8_SB	11	50379	90.7713374534		Motif:Copia-2_PPM-I	4	29906	94.9396825397		Motif:Gypsy-107_ZM-I	2	70314	99.5525980462												Motif:L1-1_Tbel	1	2133	83.3854573886		Motif:Copia-35_BD-I	1	1422	96.7346938776
Motif:P-1_PTrit	1	11550	96.5880582037		Motif:L2-34_DR	7	81306	95.0324933377		Motif:SSU-rRNA_Lvi	5	78672	94.2303776545		Motif:EnSpm-5_VV	11	50390	90.7911569161		Motif:Copia-23_Mad-I	4	29910	94.9523809524		Motif:FUGUREP2	2	70316	99.5554297041												Motif:L1-1F_Cpo	1	2134	83.42455043		Motif:Copia-33-I_VV	1	1423	96.8027210884
Motif:P-1_DRh	1	11551	96.5964208062		Motif:L1MC4	7	81313	95.0406751134		Motif:SPMLIKE	5	78677	94.2363664674		Motif:EnSpm1_TM	11	50401	90.8109763788		Motif:Copia-102_SB-I	4	29914	94.9650793651		Motif:FUGUREP1	2	70318	99.558261362												Motif:L1-1D_Cpo	1	2135	83.4636434715		Motif:Copia-31_Pru-LTR	1	1424	96.8707482993
Motif:P-1_DPu	1	11552	96.6047834086		Motif:L1-64_DR	7	81320	95.0488568891		Motif:Sola2-1_HM	5	78682	94.2423552803		Motif:EnSpm-1_BF	11	50412	90.8307958415		Motif:COP6_I_MT-int	4	29918	94.9777777778		Motif:ERV-5_AMi-I	2	70320	99.56109302												Motif:L1-19_Lch	1	2136	83.5027365129		Motif:Copia-31_CQ-I	1	1425	96.9387755102
Motif:P-1_DBp	1	11553	96.613146011		Motif:Helitron-N12_CGi	7	81327	95.0570386647		Motif:RLTR20A4	5	78687	94.2483440932		Motif:DNA3-11_CGi	11	50423	90.8506153042		Motif:CACTA_LP	4	29922	94.9904761905		Motif:ERV2-N1_Opr-I	2	70322	99.5639246779												Motif:L1-17_XT	1	2137	83.5418295543		Motif:Copia30-ZM_LTR	1	1426	97.0068027211
Motif:Outcast-18_AAe	1	11554	96.6215086135		Motif:hAT-N31_DR	7	81334	95.0652204404		Motif:RLG_scMaximus_1_7-I	5	78692	94.2543329061		Motif:DNA2-1_DR	11	50434	90.8704347669		Motif:BEL-50_DRe-LTR	4	29926	95.0031746032		Motif:ERV1-3_FCa-I	2	70324	99.5667563358												Motif:L1-15_Mad	1	2138	83.5809225958		Motif:Copia-30_PAb-I	1	1427	97.074829932
Motif:Ogre-PT3_I-int	1	11555	96.6298712159		Motif:hATm-33_HM	7	81341	95.0734022161		Motif:RLG_scMaximus_1_4-I	5	78697	94.260321719		Motif:CLOUD-4	11	50445	90.8902542297		Motif:tRNA-Leu-TTA	3	29929	95.0126984127		Motif:EnSpm-4_Mad	2	70326	99.5695879938												Motif:Kolobok-N9_DR	1	2139	83.6200156372		Motif:Copia-21_BRa-I	1	1428	97.1428571429
Motif:NICER19B-int	1	11556	96.6382338184		Motif:hAT-5_GM	7	81348	95.0815839918		Motif:RLG_scMaximus_1_1-I	5	78702	94.2663105319		Motif:Athila7_I-int	11	50456	90.9100736924		Motif:tRNA-Ala-GCG	3	29932	95.0222222222		Motif:EnSpm-3_HV	2	70328	99.5724196517												Motif:KolobokE-2_AP	1	2140	83.6591086787		Motif:Copia-1_ST-LTR	1	1429	97.2108843537
Motif:Neptune3_Ren	1	11557	96.6465964208		Motif:hAT1_Laf	7	81355	95.0897657675		Motif:Rex1-31_DRe	5	78707	94.2722993448		Motif:Ves2B_ML	10	50466	90.9280913857		Motif:TguLTRK7k	3	29935	95.0317460317		Motif:EnSpm-21_HMa	2	70330	99.5752513096												Motif:Kolobok-20_HMa	1	2141	83.6982017201		Motif:Copia-1_ES-I	1	1430	97.2789115646
Motif:MUDSOLT1	1	11558	96.6549590232		Motif:HAT13_CB	7	81362	95.0979475431		Motif:RandI-1_VC	5	78712	94.2782881577		Motif:U2	10	50476	90.9461090791		Motif:TE-X-1_NVi	3	29938	95.0412698413		Motif:EnSpm-1_TM	2	70332	99.5780829676												Motif:Kolobok-14_HM	1	2142	83.7372947615		Motif:Copia-1_CMe-I	1	1431	97.3469387755
Motif:MUDR_ZM	1	11559	96.6633216257		Motif:Gypsy-8_DMoj-I	7	81369	95.1061293188		Motif:R1D_NVi	5	78717	94.2842769706		Motif:tRNA-Met-i	10	50486	90.9641267725		Motif:TCN3-LTR	3	29941	95.0507936508		Motif:DNA-X-14_DR	2	70334	99.5809146255												Motif:Kiri-22_AAe	1	2143	83.776387803		Motif:Copia-1_CCO-I	1	1432	97.4149659864
Motif:MuDR-8_VV	1	11560	96.6716842281		Motif:Gypsy-6_EPa-I	7	81376	95.1143110945		Motif:Poseidon-2B_PM	5	78722	94.2902657835		Motif:Tad1-66B_BG	10	50496	90.9821444659		Motif:SSU-rRNA_Hsa	3	29944	95.0603174603		Motif:DNAREP1_DYak	2	70336	99.5837462834												Motif:Kiri-17_AAe	1	2144	83.8154808444		Motif:Copia-18_MLP-I	1	1433	97.4829931973
Motif:MuDR-5_VV	1	11561	96.6800468306		Motif:Gypsy-42_PM-LTR	7	81383	95.1224928702		Motif:Penelope-12_HM	5	78727	94.2962545964		Motif:RLTR17B_Mm	10	50506	91.0001621592		Motif:SSU-rRNA_Dme	3	29947	95.0698412698		Motif:DNA5-4_CGi	2	70338	99.5865779414												Motif:Jockey-5_DPer	1	2145	83.8545738858		Motif:Copia-17_DPu-I	1	1434	97.5510204082
Motif:MuDR-2_FV	1	11562	96.688409433		Motif:Gypsy-27_CSa-I	7	81390	95.1306746458		Motif:P-34_HM	5	78732	94.3022434093		Motif:Rex1-31_DRe	10	50516	91.0181798526		Motif:SSU-rRNA_Ath	3	29950	95.0793650794		Motif:DNA3-1_CGi	2	70340	99.5894095993												Motif:Jockey-12_AAe	1	2146	83.8936669273		Motif:Copia-15_PX-LTR	1	1435	97.619047619
Motif:MuDR-21_VV	1	11563	96.6967720355		Motif:Gypsy-25_BD-I	7	81397	95.1388564215		Motif:P-2_HM	5	78737	94.3082322222		Motif:Polinton-2_PBa	10	50526	91.036197546		Motif:SHACOP15_I_MT-int	3	29953	95.0888888889		Motif:DNA-2-1_NVi	2	70342	99.5922412573												Motif:ISL2EU-N5B_CGi	1	2147	83.9327599687		Motif:Copia-15_AA-I	1	1436	97.6870748299
Motif:MuDr-1x_SP	1	11564	96.7051346379		Motif:Gypsy-1_GGr-I	7	81404	95.1470381972		Motif:ONSATB	5	78742	94.3142210351		Motif:piggyBac-N6_SP	10	50536	91.0542152394		Motif:SAT-13_DR	3	29956	95.0984126984		Motif:DIRS-4N2_DR	2	70344	99.5950729152												Motif:ISL2EU-8_CGi	1	2148	83.9718530102		Motif:Copia-13_BD-I	1	1437	97.7551020408
Motif:MuDR-18_SBi	1	11565	96.7134972403		Motif:Gypsy-117_SB-I	7	81411	95.1552199729		Motif:Novosib-3_CR	5	78747	94.320209848		Motif:Neptune3_Ren	10	50546	91.0722329327		Motif:ROO_I-int	3	29959	95.1079365079		Motif:DIRS-1_CR	2	70346	99.5979045731												Motif:IS3EU-1_DR	1	2149	84.0109460516		Motif:Copia-136_SB-I	1	1438	97.8231292517
Motif:MuDR-11N_VV	1	11566	96.7218598428		Motif:ERV1-4-EC_I-int	7	81418	95.1634017486		Motif:Nematis_Cr	5	78752	94.3261986609		Motif:MdoLTR3-int	10	50556	91.0902506261		Motif:RLTR51A_Mm	3	29962	95.1174603175		Motif:CryptonV-1_HSal	2	70348	99.6007362311												Motif:IBGypsy1_I-int	1	2150	84.050039093		Motif:Copia-12_PAb-LTR	1	1439	97.8911564626
Motif:MuDR-11_GM	1	11567	96.7302224452		Motif:DNA9-3C_Mad	7	81425	95.1715835242		Motif:MUMET1	5	78757	94.3321874738		Motif:LatiHarb1-2	10	50566	91.1082683195		Motif:RLG_scDEL_1_2-I	3	29965	95.126984127		Motif:CryptonS-8_PI	2	70350	99.603567889												Motif:I-6_AAe	1	2151	84.0891321345		Motif:Copia-11_LH-I	1	1440	97.9591836735
Motif:MuDR-11B_GM	1	11568	96.7385850477		Motif:DNA8-5_DR	7	81432	95.1797652999		Motif:MuDR-18_SBi	5	78762	94.3381762867		Motif:L1_AC_13	10	50576	91.1262860129		Motif:Rex1-1B_FR	3	29968	95.1365079365		Motif:CR1-80_HM	2	70352	99.6063995469												Motif:HERVIP10B3-int	1	2152	84.1282251759		Motif:Copia-10_ES-I	1	1441	98.0272108844
Motif:MuDR-10_GM	1	11569	96.7469476501		Motif:DNA-8-36_DR	7	81439	95.1879470756		Motif:MINISAT3_CB	5	78767	94.3441650996		Motif:hAT-N31_DR	10	50586	91.1443037062		Motif:Retrofit5_I-int	3	29971	95.146031746		Motif:CR1-2_CQ	2	70354	99.6092312049												Motif:HERVFH21-int	1	2153	84.1673182174		Motif:Copia-100_Mad-I	1	1442	98.0952380952
Motif:MTCOPIA2_I-int	1	11570	96.7553102526		Motif:DNA6-2_DR	7	81446	95.1961288513		Motif:Mariner-N2_PBa	5	78772	94.3501539125		Motif:hAT-54_HM	10	50596	91.1623213996		Motif:Polinton-2_SP	3	29974	95.1555555556		Motif:CR1-1_CQ	2	70356	99.6120628628												Motif:HELMET2	1	2154	84.2064112588		Motif:Clu-166_AG	1	1443	98.1632653061
Motif:MER2-2_Laf	1	11571	96.763672855		Motif:CR1-64_HM	7	81453	95.204310627		Motif:Mariner-31_HM	5	78777	94.3561427254		Motif:HAL1-1D_Tbel	10	50606	91.180339093		Motif:Polinton-2_HM	3	29977	95.1650793651		Motif:Copia-62_SB-I	2	70358	99.6148945207												Motif:HelitronY3	1	2155	84.2455043002		Motif:CLOUD-4	1	1444	98.231292517
Motif:MER101-int	1	11572	96.7720354574		Motif:CR1-3_HM	7	81460	95.2124924026		Motif:LTR-1_PSt-LTR	5	78782	94.3621315383		Motif:Gypsy-54_GM-LTR	10	50616	91.1983567864		Motif:Polinton-1_DGr	3	29980	95.1746031746		Motif:Copia-38_CQ-I	2	70360	99.6177261787												Motif:HelitronY1D	1	2156	84.2845973417		Motif:CLAUDIA1_TM_I-int	1	1445	98.2993197279
Motif:Mariner-N8_SIn	1	11573	96.7803980599		Motif:Copia18-NVi_I-int	7	81467	95.2206741783		Motif:L2-8_AAe	5	78787	94.3681203512		Motif:Gypsy37-I_AG	10	50626	91.2163744797		Motif:Nimb-4_DR	3	29983	95.1841269841		Motif:Copia-1_SCH-I	2	70362	99.6205578366												Motif:HelitronY1_CE	1	2157	84.3236903831		Motif:CER13-I_CE	1	1446	98.3673469388
Motif:Mariner-N6_SIn	1	11574	96.7887606623		Motif:Copia-12_PAb-LTR	7	81474	95.228855954		Motif:L1_AC_13	5	78792	94.3741091641		Motif:Gypsy-22_SB-I	10	50636	91.2343921731		Motif:MuDR-11_GM	3	29986	95.1936507937		Motif:Copia-1_DTa-I	2	70364	99.6233894945												Motif:HelitronY1A_CE	1	2158	84.3627834246		Motif:CATCH2LTR_DR	1	1447	98.4353741497
Motif:Mariner-33_HM	1	11575	96.7971232648		Motif:TE-X-1_NVi	6	81480	95.2358689046		Motif:L1-47B_ACar	5	78797	94.380097977		Motif:Gypsy-22_DWil-LTR	10	50646	91.2524098665		Motif:Merlin-1_CGi	3	29989	95.2031746032		Motif:Copia-17_DPu-I	2	70366	99.6262211525												Motif:Helitron-N3_ZM	1	2159	84.401876466		Motif:CACTA-O	1	1448	98.5034013605
Motif:Mariner-2_SLL	1	11576	96.8054858672		Motif:SLIDE	6	81486	95.2428818552		Motif:Kiri-18_AAe	5	78802	94.3860867899		Motif:Gypsy-1_AC-I	10	50656	91.2704275599		Motif:Mariner-N1_CGi	3	29992	95.2126984127		Motif:Copia-14_BG-I	2	70368	99.6290528104												Motif:Helitron-N34_CGi	1	2160	84.4409695074		Motif:CACTA_LP	1	1449	98.5714285714
Motif:Mariner-2N2_XT	1	11577	96.8138484696		Motif:SHAMUDRAV_MT	6	81492	95.2498948057		Motif:Kiri-13_AAe	5	78807	94.3920756028		Motif:Gypsy120-LTR_DR	10	50666	91.2884452532		Motif:Mariner-8_ROr	3	29995	95.2222222222		Motif:Copia12-ZM_I-int	2	70370	99.6318844684												Motif:Helitron-N1_HSal	1	2161	84.4800625489		Motif:CACTA-1_CapOwc	1	1450	98.6394557823
Motif:Mariner-1_DGr	1	11578	96.8222110721		Motif:RTIP1_I-int	6	81498	95.2569077563		Motif:Jockey_Ele7	5	78812	94.3980644157		Motif:EnSpm-5_DR	10	50676	91.3064629466		Motif:Mariner-29_AEc	3	29998	95.2317460317		Motif:Chapaev-8_HM	2	70372	99.6347161263												Motif:Helitron-9_CGi	1	2162	84.5191555903		Motif:Bilbo	1	1451	98.7074829932
Motif:Mariner-19_HSal	1	11579	96.8305736745		Motif:ROO_I-int	6	81504	95.2639207069		Motif:Jockey-7_DPer	5	78817	94.4040532286		Motif:DNA6-4_DR	10	50686	91.32448064		Motif:Mariner-20_SM	3	30001	95.2412698413		Motif:CACTA-Q	2	70374	99.6375477842												Motif:Helitron-8_CGi	1	2163	84.5582486317		Motif:BEL-7_DPu-I	1	1452	98.7755102041
Motif:MAR_DW	1	11580	96.838936277		Motif:Rehavkus-2_HR	6	81510	95.2709336575		Motif:Jockey-2_DGri	5	78822	94.4100420415		Motif:Copia-50_BG-I	10	50696	91.3424983334		Motif:Mariner-18_HSal	3	30004	95.2507936508		Motif:BHIKHARI-5-I_DR	2	70376	99.6403794422												Motif:Helitron-4N1_SMo	1	2164	84.5973416732		Motif:BEL-646_AA-I	1	1453	98.843537415
Motif:Lx9	1	11581	96.8472988794		Motif:Polinton-2A_NV	6	81516	95.2779466081		Motif:ISL2EU-8_CGi	5	78827	94.4160308544		Motif:Copia-31_Pru-LTR	10	50706	91.3605160267		Motif:Mariner-17_HM	3	30007	95.2603174603		Motif:BEL-3-LTR_NVi	2	70378	99.6432111001												Motif:Helitron2_ZM	1	2165	84.6364347146		Motif:BEL-615_AA-I	1	1454	98.9115646259
Motif:Lx10	1	11582	96.8556614819		Motif:Polinton1_SM	6	81522	95.2849595587		Motif:ISL2EU-15_CGi	5	78832	94.4220196673		Motif:Chapaev-3B_HM	10	50716	91.3785337201		Motif:LTR-12B_Crp	3	30010	95.2698412698		Motif:BEL-227_AA-I	2	70380	99.646042758												Motif:Helitron-2_SIn	1	2166	84.6755277561		Motif:BEL-54_CQ-I	1	1455	98.9795918367
Motif:LTR-86_Gav	1	11583	96.8640240843		Motif:Ogre-MT4_I-int	6	81528	95.2919725092		Motif:HeT-A3_DVi	5	78837	94.4280084802		Motif:Chapaev-11_HM	10	50726	91.3965514135		Motif:LatiHarb1-N3A	3	30013	95.2793650794		Motif:BEL-155_AA-LTR	2	70382	99.648874416												Motif:Helitron-2_AMi	1	2167	84.7146207975		Motif:BEL-4_DWil-I	1	1456	99.0476190476
Motif:LTR-83_Gav	1	11584	96.8723866867		Motif:Nimb-4_DR	6	81534	95.2989854598		Motif:Helitron-7_NVi	5	78842	94.4339972931		Motif:tRNA-Ala-GCG	9	50735	91.4127673375		Motif:LatiHarb1-2	3	30016	95.2888888889		Motif:ATCopia59_I-int	2	70384	99.6517060739												Motif:Helitron-1_FV	1	2168	84.7537138389		Motif:BEL-35_AA-I	1	1457	99.1156462585
Motif:LTR57-int	1	11585	96.8807492892		Motif:Mariner-4_LHu	6	81540	95.3059984104		Motif:Helitron1	5	78847	94.439986106		Motif:Transib-16_HM	9	50744	91.4289832616		Motif:L2_Plat1c	3	30019	95.2984126984		Motif:Ag-Outcast-5	2	70386	99.6545377318												Motif:Helitron-1_DEu	1	2169	84.7928068804		Motif:BEL-30_CQ-I	1	1458	99.1836734694
Motif:LTR38-int	1	11586	96.8891118916		Motif:Helitron2_PPa	6	81546	95.313011361		Motif:Helena_Ds	5	78852	94.4459749189		Motif:STRID3	9	50753	91.4451991856		Motif:L2-9_NVi	3	30022	95.3079365079		Motif:Zisupton-5_DR	1	70387	99.6559535608												Motif:Helitron-1_AC	1	2170	84.8318999218		Motif:BEL-29_AA-I	1	1459	99.2517006803
Motif:LTR2C_Opr	1	11587	96.8974744941		Motif:hATm-50_HM	6	81552	95.3200243116		Motif:hAT-N132_DR	5	78857	94.4519637317		Motif:RMER17D2	9	50762	91.4614151096		Motif:L2-56_DR	3	30025	95.3174603175		Motif:Waldo-3_AAe	1	70388	99.6573693898												Motif:hATx-4_SM	1	2171	84.8709929633		Motif:BEL-227_AA-I	1	1460	99.3197278912
Motif:LTR1B1b_CHo	1	11588	96.9058370965		Motif:hAT-7N2_PM	6	81558	95.3270372621		Motif:hAT-54_HM	5	78862	94.4579525446		Motif:RLTR21	9	50771	91.4776310337		Motif:L2-16_NVe	3	30028	95.326984127		Motif:U6	1	70389	99.6587852187												Motif:hAT-N75_DR	1	2172	84.9100860047		Motif:BEL-20_DTa-I	1	1461	99.387755102
Motif:LTR18F_ML	1	11589	96.9141996989		Motif:hAT-40_HM	6	81564	95.3340502127		Motif:hAT-4C_ACar	5	78867	94.4639413575		Motif:P-2_Hrobusta	9	50780	91.4938469577		Motif:L2-12b_Lch	3	30031	95.3365079365		Motif:U2	1	70390	99.6602010477												Motif:hAT-N4_STu	1	2173	84.9491790461		Motif:BEL1-I_SM	1	1462	99.4557823129
Motif:LTR-12_Crp	1	11590	96.9225623014		Motif:hAT-33_HM	6	81570	95.3410631633		Motif:hAT-47_HM	5	78872	94.4699301704		Motif:OposCharlie1	9	50789	91.5100628817		Motif:L1-2_FR	3	30034	95.346031746		Motif:tRNA-Ser-TCY	1	70391	99.6616168767												Motif:hATN-4_ACar	1	2174	84.9882720876		Motif:BEL-1-I_NV	1	1463	99.5238095238
Motif:LTR-12C2_Crp	1	11591	96.9309249038		Motif:HAT11_CB	6	81576	95.3480761139		Motif:HAT13_CB	5	78877	94.4759189833		Motif:Mariner-59N1_HSal	9	50798	91.5262788058		Motif:Kolobok-N1_PBa	3	30037	95.3555555556		Motif:tRNA-Pro-CCG	1	70392	99.6630327056												Motif:hAT-N35C_DR	1	2175	85.027365129		Motif:BEL-19_CQ-LTR	1	1464	99.5918367347
Motif:LTR-12_AMi	1	11592	96.9392875063		Motif:HAL1-1D_Tbel	6	81582	95.3550890645		Motif:hAT-10_XT	5	78882	94.4819077962		Motif:Mariner-2_SLL	9	50807	91.5424947298		Motif:Kolobok-7_CGi	3	30040	95.3650793651		Motif:tRNA-Phe-TTY	1	70393	99.6644485346												Motif:HATN15_DR	1	2176	85.0664581704		Motif:BEL-11_CGi-I	1	1465	99.6598639456
Motif:LT1_DPu-LTR	1	11593	96.9476501087		Motif:Gypsy-77-I_ZM	6	81588	95.3621020151		Motif:HAL1-1D_Tbel	5	78887	94.4878966091		Motif:Mariner-24_CGi	9	50816	91.5587106539		Motif:Kiri-10_AAe	3	30043	95.3746031746		Motif:tRNA-Leu-TTG	1	70394	99.6658643636												Motif:HATN11_DR	1	2177	85.1055512119		Motif:Athila0_I-int	1	1466	99.7278911565
Motif:LSU-rRNA_Hsa	1	11594	96.9560127112		Motif:Gypsy-600_AA-I	6	81594	95.3691149656		Motif:GYVIT1_I-int	5	78892	94.493885422		Motif:Mariner-19_HM	9	50825	91.5749265779		Motif:Helitron-N35_CGi	3	30046	95.3841269841		Motif:tRNA-Glu-GAG_	1	70395	99.6672801926												Motif:hAT-N10_ACar	1	2178	85.1446442533		Motif:ATGP10_I-int	1	1467	99.7959183673
Motif:Loner_Ele1	1	11595	96.9643753136		Motif:Gypsy4-I_Dya	6	81600	95.3761279162		Motif:Gypsy6-NVi_LTR	5	78897	94.4998742349		Motif:LTR-1_Mad	9	50834	91.5911425019		Motif:hAT-N36B_DR	3	30049	95.3936507937		Motif:tRNA-2_DRe	1	70396	99.6686960215												Motif:hATm-12_HM	1	2179	85.1837372948		Motif:ATCopia59_I-int	1	1468	99.8639455782
Motif:LOA_Ele6C_AAe	1	11596	96.972737916		Motif:Gypsy4-I_Dmoj	6	81606	95.3831408668		Motif:Gypsy-5N_PPa-LTR	5	78902	94.5058630478		Motif:LSU-rRNA_Hsa	9	50843	91.607358426		Motif:hAT-N34_DR	3	30052	95.4031746032		Motif:Transib-1_HM	1	70397	99.6701118505												Motif:hAT6-2_SP	1	2180	85.2228303362		Motif:Academ-4_SP	1	1469	99.9319727891
Motif:LINE1-62_SBi	1	11597	96.9811005185		Motif:Gypsy14-SM_I-int	6	81612	95.3901538174		Motif:Gypsy-31-I_NVi	5	78907	94.5118518607		Motif:LSU-rRNA_Cel	9	50852	91.62357435		Motif:HATN11B_DR	3	30055	95.4126984127		Motif:TE-X-12_DR	1	70398	99.6715276795												Motif:hAT-3_LCh	1	2181	85.2619233776		Motif:Academ-3_BF	1	1470	100
Motif:LINE1-40_SBi	1	11598	96.9894631209		Motif:Gypsy13-SM_I-int	6	81618	95.397166768		Motif:Gypsy-26_VV-I	5	78912	94.5178406736		Motif:L2_Plat1i	9	50861	91.639790274		Motif:hAT-2_TS	3	30058	95.4222222222		Motif:TE-2_XT	1	70399	99.6729435084												Motif:hAT-3_FV	1	2182	85.3010164191
Motif:LINE1-30_SBi	1	11599	96.9978257234		Motif:Gypsy-137_GM-I	6	81624	95.4041797185		Motif:Gypsy-20_RO-I	5	78917	94.5238294865		Motif:L1-44_XT	9	50870	91.6560061981		Motif:hAT-25N1_DR	3	30061	95.4317460317		Motif:TE2-4_CR	1	70400	99.6743593374												Motif:hAT-24_DR	1	2183	85.3401094605
Motif:LINE1-15_ZM	1	11600	97.0061883258		Motif:Gypsy-10_DEl-I	6	81630	95.4111926691		Motif:Gypsy-204_DR-I	5	78922	94.5298182994		Motif:ISL2EU-7_CGi	9	50879	91.6722221221		Motif:Harbinger-N15_DR	3	30064	95.4412698413		Motif:TART-A	1	70401	99.6757751664												Motif:hAT-23_HM	1	2184	85.379202502
Motif:LINE1-15_SBi	1	11601	97.0145509282		Motif:Gypsy-105_AA-I	6	81636	95.4182056197		Motif:Gypsy-1_PCR-LTR	5	78927	94.5358071123		Motif:HERVIP10FH-int	9	50888	91.6884380462		Motif:Harbinger-2_GA	3	30067	95.4507936508		Motif:SSU-rRNA_Lvi	1	70402	99.6771909953												Motif:hAT-20_Mad	1	2185	85.4182955434
Motif:LIN2_SM	1	11602	97.0229135307		Motif:Ginger1-2_DR	6	81642	95.4252185703		Motif:Gypsy15-I_CR	5	78932	94.5417959252		Motif:Helitron-3_PM	9	50897	91.7046539702		Motif:Harbinger1_DR	3	30070	95.4603174603		Motif:SSU-rRNA_Hsa	1	70403	99.6786068243												Motif:hAT-1_EPa	1	2186	85.4573885848
Motif:L2_AC_2	1	11603	97.0312761331		Motif:DNA-8-7_DR	6	81648	95.4322315209		Motif:Gypsy-125_SBi-LTR	5	78937	94.5477847381		Motif:Helitron-1_DT	9	50906	91.7208698942		Motif:HARB-6_ALy	3	30073	95.4698412698		Motif:Sola1-1_Smoe	1	70404	99.6800226533												Motif:HAT1_DR	1	2187	85.4964816263
Motif:L2-1_NVi	1	11604	97.0396387356		Motif:DNA-2-13_DR	6	81654	95.4392444715		Motif:ERV1-4-EC_I-int	5	78942	94.553773551		Motif:hAT-N71_DR	9	50915	91.7370858183		Motif:Gypsy98-LTR_Dr	3	30076	95.4793650794		Motif:SHALINE2_MT	1	70405	99.6814384822												Motif:HAT19_CB	1	2188	85.5355746677
Motif:L1PA17	1	11605	97.048001338		Motif:DNA2-10_CGi	6	81660	95.446257422		Motif:EnSpm-N10_DR	5	78947	94.5597623639		Motif:hAT-5_LCh	9	50924	91.7533017423		Motif:Gypsy69-ZM_I-int	3	30079	95.4888888889		Motif:SFV1-10B_Gav-LTR	1	70406	99.6828543112												Motif:HAT-17_Mad	1	2189	85.5746677091
Motif:L1-N3_FV	1	11606	97.0563639405		Motif:DIRS-8_DR	6	81666	95.4532703726		Motif:EnSpm-5_VV	5	78952	94.5657511768		Motif:hAT-10_DR	9	50933	91.7695176663		Motif:Gypsy-62-I_NV	3	30082	95.4984126984		Motif:SAT_PL	1	70407	99.6842701402												Motif:hAT-15_SBi	1	2190	85.6137607506
Motif:L1_Mdo4	1	11607	97.0647265429		Motif:DIRS-35_ACar	6	81672	95.4602833232		Motif:ENSPM2_MT	5	78957	94.5717399897		Motif:Harbinger-5_DR	9	50942	91.7857335904		Motif:Gypsy-43_DWil-I	3	30085	95.5079365079		Motif:SAT-1_SK	1	70408	99.6856859691												Motif:hAT-14_SBi	1	2191	85.652853792
Motif:L1MD2	1	11608	97.0730891453		Motif:Copia-8_Pru-I	6	81678	95.4672962738		Motif:EnSpm-12_OS	5	78962	94.5777288026		Motif:Gypsy-62_BG-LTR	9	50951	91.8019495144		Motif:Gypsy-3_ES-I	3	30088	95.5174603175		Motif:RLG_scMaximus_1_8-I	1	70409	99.6871017981												Motif:hAT-11_SBi	1	2192	85.6919468335
Motif:L1MCa	1	11609	97.0814517478		Motif:Copia-7-I_DR	6	81684	95.4743092244		Motif:EnSpm-11_OS	5	78967	94.5837176155		Motif:Gypsy-59_CQ-I	9	50960	91.8181654385		Motif:Gypsy-29_DWil-I	3	30091	95.526984127		Motif:RLG_scMaximus_1_5-I	1	70410	99.6885176271												Motif:hAT-10_Crp	1	2193	85.7310398749
Motif:L1MC4	1	11610	97.0898143502		Motif:Copia-3_MLP-I	6	81690	95.4813221749		Motif:DNA-N4_DR	5	78972	94.5897064284		Motif:Gypsy-14_OD-I	9	50969	91.8343813625		Motif:Gypsy-26-I_NVi	3	30094	95.5365079365		Motif:REP-3_CPB	1	70411	99.689933456												Motif:HARB-N1_ALy	1	2194	85.7701329163
Motif:L1_BT	1	11611	97.0981769527		Motif:Copia-37_DPu-I	6	81696	95.4883351255		Motif:DNA-8-36_DR	5	78977	94.5956952413		Motif:Gypsy-13_Mad-I	9	50978	91.8505972865		Motif:Gypsy-25-LTR_DR	3	30097	95.546031746		Motif:REP-1_CQ	1	70412	99.691349285												Motif:Harbinger-4D_PSt	1	2195	85.8092259578
Motif:L1A-2_MD	1	11612	97.1065395551		Motif:Copia-29_PAb-I	6	81702	95.4953480761		Motif:DNA-8-29_DR	5	78982	94.6016840542		Motif:Gypsy-10_PAb-I	9	50987	91.8668132106		Motif:Gypsy152B-LTR_DR	3	30100	95.5555555556		Motif:R7Ag1	1	70413	99.692765114												Motif:Harbinger-4B_PSt	1	2196	85.8483189992
Motif:L1-81_ACar	1	11613	97.1149021576		Motif:Copia-14_CQ-I	6	81708	95.5023610267		Motif:DNA-2-3_DR	5	78987	94.6076728671		Motif:EqERV-beta1-int	9	50996	91.8830291346		Motif:Galileo_DM	3	30103	95.5650793651		Motif:polypyrimidine	1	70414	99.6941809429												Motif:Harbinger2-1_NV	1	2197	85.8874120407
Motif:L1-64_DR	1	11614	97.12326476		Motif:Chapaev-11_HM	6	81714	95.5093739773		Motif:DIRS-15_DR	5	78992	94.61366168		Motif:EnSpm-N11_DR	9	51005	91.8992450586		Motif:ERV-6_CPB-I	3	30106	95.5746031746		Motif:polypurine	1	70415	99.6955967719												Motif:Harbinger2-1_ES	1	2198	85.9265050821
Motif:L1-61_ACar	1	11615	97.1316273624		Motif:CATCH2LTR_DR	6	81720	95.5163869279		Motif:CR1-79_AAe	5	78997	94.6196504929		Motif:DNA-X-12_DR	9	51014	91.9154609827		Motif:ERV1-1_SSc-I	3	30109	95.5841269841		Motif:Polinton-5_SP	1	70416	99.6970126009												Motif:Harbinger-1_PPe	1	2199	85.9655981235
Motif:L1-5_LA	1	11616	97.1399899649		Motif:BEL-1N_AA-I	6	81726	95.5233998784		Motif:CR1-27_BF	5	79002	94.6256393058		Motif:DNA2-10_DR	9	51023	91.9316769067		Motif:EnSpm-4_HV	3	30112	95.5936507937		Motif:Polinton-3_TC	1	70417	99.6984284298												Motif:Harbinger-1_LCh	1	2200	86.004691165
Motif:L1-51_DR	1	11617	97.1483525673		Motif:ATENSPM2	6	81732	95.530412829		Motif:CR1-1_NV	5	79007	94.6316281187		Motif:DIRS-35_ACar	9	51032	91.9478928308		Motif:EnSpm3_SB	3	30115	95.6031746032		Motif:Polinton-1_LCh	1	70418	99.6998442588												Motif:Harbinger-1_DR	1	2201	86.0437842064
Motif:L1-50_DR	1	11618	97.1567151698		Motif:AmnL2-1	6	81738	95.5374257796		Motif:Copia-29-I_VV	5	79012	94.6376169316		Motif:DGI_SP	9	51041	91.9641087548		Motif:EnSpm-38_SBi	3	30118	95.6126984127		Motif:Polinton-1_DAn	1	70419	99.7012600878												Motif:HARB-6_ALy	1	2202	86.0828772478
Motif:L1-3_Tbel	1	11619	97.1650777722		Motif:U2	5	81743	95.5432699051		Motif:Copia-27_Pru-I	5	79017	94.6436057445		Motif:DEL_LH_I-int	9	51050	91.9803246788		Motif:EnSpm-36_SBi	3	30121	95.6222222222		Motif:piggyBac-1N1_XT	1	70420	99.7026759167												Motif:HARB-4_Mad	1	2203	86.1219702893
Motif:L1-36_DR	1	11620	97.1734403746		Motif:tRNA-Phe-TTY	5	81748	95.5491140306		Motif:Copia23-ZM_I-int	5	79022	94.6495945574		Motif:CEREBA_HV-int	9	51059	91.9965406029		Motif:EnSpm-2_TA	3	30124	95.6317460317		Motif:Penelope-12_HM	1	70421	99.7040917457												Motif:HARB-2_SBi	1	2204	86.1610633307
Motif:L1-2_Fc	1	11621	97.1818029771		Motif:tRNAPheTTC_CB	5	81753	95.5549581561		Motif:Copia-1_SPDB-I	5	79027	94.6555833703		Motif:Tx1-16_DR	8	51067	92.0109547576		Motif:EnSpm-1_Mad	3	30127	95.6412698413		Motif:P-2_PBa	1	70422	99.7055075747												Motif:HARB-2_ALy	1	2205	86.2001563722
Motif:Kolobok-7_CGi	1	11622	97.1901655795		Motif:tRNA-3_DRe	5	81758	95.5608022815		Motif:Copia-12_LH-I	5	79032	94.6615721832		Motif:SINE2-4a1_SP	8	51075	92.0253689123		Motif:EnSpm-10N1_DR	3	30130	95.6507936508		Motif:P-13_HM	1	70423	99.7069234037												Motif:HARB-1_FV	1	2206	86.2392494136
Motif:Kolobok-2_LMi	1	11623	97.198528182		Motif:Shinagawa-1_AAe	5	81763	95.566646407		Motif:COPI2_I-int	5	79037	94.6675609961		Motif:RTEX-3_NV	8	51083	92.039783067		Motif:DNAX-25_DR	3	30133	95.6603174603		Motif:OSMU5	1	70424	99.7083392326												Motif:HAL1-3D_Cpo	1	2207	86.278342455
Motif:Kolobok-2_CGi	1	11624	97.2068907844		Motif:Sagan-1_ESi	5	81768	95.5724905325		Motif:Chapaev3-1_HR	5	79042	94.673549809		Motif:RTEX-2_NV	8	51091	92.0541972217		Motif:DNA-X-12_DR	3	30136	95.6698412698		Motif:OGRE-I_PS	1	70425	99.7097550616												Motif:HAL1-1G_Cpo	1	2208	86.3174354965
Motif:Kolobok-1_NV	1	11625	97.2152533869		Motif:SACI-5	5	81773	95.578334658		Motif:BEL-4_DPer-I	5	79047	94.6795386219		Motif:REP-1_ZM	8	51099	92.0686113764		Motif:DNA6-9_CGi	3	30139	95.6793650794		Motif:Novosib-5_CR	1	70426	99.7111708906												Motif:GYVIT1_I-int	1	2209	86.3565285379
Motif:Kolobok-1_LG	1	11626	97.2236159893		Motif:RTE-17_BF	5	81778	95.5841787835		Motif:ATHAT1	5	79052	94.6855274348		Motif:polypyrimidine	8	51107	92.0830255311		Motif:DNA3-7_STu	3	30142	95.6888888889		Motif:MuDR-3_SBi	1	70427	99.7125867195												Motif:Gypsy-I_MT	1	2210	86.3956215794
Motif:Kolobok-19_HMa	1	11627	97.2319785917		Motif:ROVER-I_DM	5	81783	95.590022909		Motif:ATCopia69_I-int	5	79057	94.6915162476		Motif:P-1_DBp	8	51115	92.0974396858		Motif:DNA3-10_CGi	3	30145	95.6984126984		Motif:MuDR-3_EPa	1	70428	99.7140025485												Motif:Gypsy-9_PBa-I	1	2211	86.4347146208
Motif:Kiri-4_AAe	1	11628	97.2403411942		Motif:RMER12C	5	81788	95.5958670345		Motif:Academ-1_HM	5	79062	94.6975050605		Motif:NERV5_MD_I-int	8	51123	92.1118538405		Motif:DNA-2-20_DR	3	30148	95.7079365079		Motif:MuDR-22_VV	1	70429	99.7154183775												Motif:Gypsy-9_PAb-I	1	2212	86.4738076622
Motif:Kiri-14_AAe	1	11629	97.2487037966		Motif:R1_DYa	5	81793	95.6017111599		Motif:Z-REP	4	79066	94.7022961109		Motif:MuDr-1x_SP	8	51131	92.1262679952		Motif:DIRS-1_SP	3	30151	95.7174603175		Motif:MERMITE18E	1	70430	99.7168342064												Motif:Gypsy-9_Mad-I	1	2213	86.5129007037
Motif:Jockey-4B_DVi	1	11630	97.2570663991		Motif:Polinton-3_PBa	5	81798	95.6075552854		Motif:XILON1_ZM-int	4	79070	94.7070871612		Motif:Lx10	8	51139	92.1406821499		Motif:CR1-78_AAe	3	30154	95.726984127		Motif:MERMITE-17	1	70431	99.7182500354												Motif:Gypsy-93_AA-I	1	2214	86.5519937451
Motif:ISL2EU-8_CGi	1	11631	97.2654290015		Motif:Polinton-2_SP	5	81803	95.6133994109		Motif:Tx1-2_DR	4	79074	94.7118782115		Motif:LTR-12D_Gav	8	51147	92.1550963046		Motif:Copia-99_GM-LTR	3	30157	95.7365079365		Motif:Mariner-N6_SIn	1	70432	99.7196658644												Motif:Gypsy8-ZM_I-int	1	2215	86.5910867866
Motif:ISL2EU-17_CGi	1	11632	97.2737916039		Motif:Polinton-2_PBa	5	81808	95.6192435364		Motif:Tx1-20_DR	4	79078	94.7166692618		Motif:LOOPERN3_DR	8	51155	92.1695104593		Motif:Copia-94_Mad-I	3	30160	95.746031746		Motif:Lueckenbuesser_I-int	1	70433	99.7210816933												Motif:Gypsy8-SM_I-int	1	2216	86.630179828
Motif:IS3EU-N1_CGi	1	11633	97.2821542064		Motif:Polinton-2_DR	5	81813	95.6250876619		Motif:tRNA-Gly-GGA	4	79082	94.7214603121		Motif:LINE1-40_SBi	8	51163	92.183924614		Motif:Copia-94_GM-I	3	30163	95.7555555556		Motif:LTR-83B_Gav	1	70434	99.7224975223												Motif:Gypsy-8_RO-I	1	2217	86.6692728694
Motif:IS3EU-4N_DR	1	11634	97.2905168088		Motif:Polinton-1_DAn	5	81818	95.6309317874		Motif:tRNAAsnGTT_CB	4	79086	94.7262513625		Motif:L1-61_ACar	8	51171	92.1983387687		Motif:Copia-7_EPa-I	3	30166	95.7650793651		Motif:LTR-47_Gav	1	70435	99.7239133513												Motif:Gypsy-8_PSo-I	1	2218	86.7083659109
Motif:INGI	1	11635	97.2988794113		Motif:P-11_HM	5	81823	95.6367759129		Motif:tRNA-Arg-CGG	4	79090	94.7310424128		Motif:Kolobok-1_DR	8	51179	92.2127529234		Motif:Copia-7_DAn-I	3	30169	95.7746031746		Motif:LTR-2_Mad-I	1	70436	99.7253291802												Motif:Gypsy8-I_Dya	1	2219	86.7474589523
Motif:I-76_AAe	1	11636	97.3072420137		Motif:MuDR-2_FV	5	81828	95.6426200383		Motif:tRNA-Arg-CGA_	4	79094	94.7358334631		Motif:ISL2EU-18_CGi	8	51187	92.2271670781		Motif:Copia-5_TC-I	3	30172	95.7841269841		Motif:LTR-12_Crp	1	70437	99.7267450092												Motif:Gypsy8-I_Dpse	1	2220	86.7865519937
Motif:I-67_AAe	1	11637	97.3156046162		Motif:MuDr-1x_TCa	5	81833	95.6484641638		Motif:Transib-6_HM	4	79098	94.7406245134		Motif:hATw-3_HM	8	51195	92.2415812328		Motif:Copia-5_SMo-I	3	30175	95.7936507937		Motif:LONGPAL1	1	70438	99.7281608382												Motif:Gypsy-84_AA-I	1	2221	86.8256450352
Motif:I-1_DP	1	11638	97.3239672186		Motif:MSAT-3_DR	5	81838	95.6543082893		Motif:TE-X-1_NVi	4	79102	94.7454155637		Motif:HATN15_DR	8	51203	92.2559953875		Motif:Copia-5_AA-I	3	30178	95.8031746032		Motif:LatiHarb1-N4A	1	70439	99.7295766671												Motif:Gypsy-83_GM-I	1	2222	86.8647380766
Motif:Helitron-N50_CGi	1	11639	97.332329821		Motif:Mariner-79_HSal	5	81843	95.6601524148		Motif:Tad1-49_BG	4	79106	94.750206614		Motif:HATN11B_DR	8	51211	92.2704095422		Motif:Copia-59_ZM-I	3	30181	95.8126984127		Motif:L2_Plat1h	1	70440	99.7309924961												Motif:Gypsy-82_SB-I	1	2223	86.9038311181
Motif:Helitron-N3_ZM	1	11640	97.3406924235		Motif:Mariner-52_HSal	5	81848	95.6659965403		Motif:Tad1-43_BG	4	79110	94.7549976644		Motif:hAT-68_HM	8	51219	92.2848236969		Motif:Copia-56_BG-I	3	30184	95.8222222222		Motif:L1_Ele28	1	70441	99.7324083251												Motif:Gypsy-81_PAb-I	1	2224	86.9429241595
Motif:Helitron-N3_PPa	1	11641	97.3490550259		Motif:Mariner-16_SIn	5	81853	95.6718406658		Motif:SINE_SM	4	79114	94.7597887147		Motif:Harbinger-4_CGi	8	51227	92.2992378516		Motif:Copia-51_VV-I	3	30187	95.8317460317		Motif:L1_AC_7	1	70442	99.733824154												Motif:Gypsy-80-I_ZM	1	2225	86.9820172009
Motif:Helitron-N3_PM	1	11642	97.3574176284		Motif:M2_VM	5	81858	95.6776847912		Motif:Sat-1_TSy	4	79118	94.764579765		Motif:HARB-4N1_Mad	8	51235	92.3136520063		Motif:Copia-4_DWil-I	3	30190	95.8412698413		Motif:L1-79_DR	1	70443	99.735239983												Motif:Gypsy-7_SI-I	1	2226	87.0211102424
Motif:Helitron-N39_CGi	1	11643	97.3657802308		Motif:LTR1A2_ML	5	81863	95.6835289167		Motif:Sagan-7_MLP	4	79122	94.7693708153		Motif:GYVIT1_I-int	8	51243	92.328066161		Motif:Copia-43_ZM-I	3	30193	95.8507936508		Motif:L1-3_VC	1	70444	99.736655812												Motif:Gypsy-7_PX-I	1	2227	87.0602032838
Motif:Helitron-N37_CGi	1	11644	97.3741428332		Motif:LTR-12C2_Crp	5	81868	95.6893730422		Motif:RT2	4	79126	94.7741618656		Motif:Gypsy50-I_DR	8	51251	92.3424803157		Motif:Copia-43_VV-I	3	30196	95.8603174603		Motif:L1-26_ACar	1	70445	99.7380716409												Motif:Gypsy7-I_VC	1	2228	87.0992963253
Motif:Helitron-N35_CGi	1	11645	97.3825054357		Motif:L1_Cis99Sat	5	81873	95.6952171677		Motif:RLTR20C2_MM	4	79130	94.778952916		Motif:Gypsy-38_NVi-LTR	8	51259	92.3568944704		Motif:Copia-43_FV-I	3	30199	95.8698412698		Motif:L1-1_CR	1	70446	99.7394874699												Motif:Gypsy7-I_AP	1	2229	87.1383893667
Motif:Helitron-N34_CGi	1	11646	97.3908680381		Motif:L1-3_Tbel	5	81878	95.7010612932		Motif:RLTR20C1_MM	4	79134	94.7837439663		Motif:Gypsy-23_PSo-I	8	51267	92.3713086251		Motif:Copia-34_PIT-I	3	30202	95.8793650794		Motif:L1-15_DR	1	70447	99.7409032989												Motif:Gypsy-7_CGi-I	1	2230	87.1774824081
Motif:Helitron-N2_SP	1	11647	97.3992306406		Motif:hAT-24_DR	5	81883	95.7069054187		Motif:RLG_scMaximus_1_5-I	4	79138	94.7885350166		Motif:Gypsy-19_SB-I	8	51275	92.3857227798		Motif:Copia-34-I_VV	3	30205	95.8888888889		Motif:L1-13_GM	1	70448	99.7423191278												Motif:Gypsy-78_PAb-I	1	2231	87.2165754496
Motif:Helitron-N2g_CGi	1	11648	97.407593243		Motif:hAT-17_Croc	5	81888	95.7127495442		Motif:REP_DE	4	79142	94.7933260669		Motif:Gypsy10-I_AG	8	51283	92.4001369345		Motif:Copia-27_SB-I	3	30208	95.8984126984		Motif:Kolobok-2_XT	1	70449	99.7437349568												Motif:Gypsy77-I_DR	1	2232	87.255668491
Motif:Helitron-N2_CGi	1	11649	97.4159558455		Motif:hAT-16_HM	5	81893	95.7185936696		Motif:R2_DYa	4	79146	94.7981171172		Motif:Gypsy-10_DVir-LTR	8	51291	92.4145510892		Motif:Copia-1_ST-LTR	3	30211	95.9079365079		Motif:Kiri-30_AAe	1	70450	99.7451507858												Motif:Gypsy-74_PAb-I	1	2233	87.2947615324
Motif:Helitron-N26_CGi	1	11650	97.4243184479		Motif:Harbinger-21_PGr	5	81898	95.7244377951		Motif:QUASIMODO_I-int	4	79150	94.8029081675		Motif:ERV-2B_Crp-LTR	8	51299	92.4289652439		Motif:Copia1-I_Dmoj	3	30214	95.9174603175		Motif:Kiri-21_AAe	1	70451	99.7465666148												Motif:Gypsy-74_MLP-I	1	2234	87.3338545739
Motif:Helitron-N13_SBi	1	11651	97.4326810503		Motif:Gypsy9-VV_I-int	5	81903	95.7302819206		Motif:PRIMA4-int	4	79154	94.8076992179		Motif:EnSpm-18_HMa	8	51307	92.4433793986		Motif:Copia-17_GM-I	3	30217	95.926984127		Motif:Kiri-15_AAe	1	70452	99.7479824437												Motif:Gypsy-74-I_ZM	1	2235	87.3729476153
Motif:Helitron-N13d_CGi	1	11652	97.4410436528		Motif:Gypsy-74-I_NV	5	81908	95.7361260461		Motif:Polinton-3_HM	4	79158	94.8124902682		Motif:DNA-8-7_DR	8	51315	92.4577935533		Motif:Copia-13_PX-I	3	30220	95.9365079365		Motif:Jockey-5_DPer	1	70453	99.7493982727												Motif:Gypsy-72_MLP-I	1	2236	87.4120406568
Motif:Helitron-7_DRh	1	11653	97.4494062552		Motif:Gypsy-6_AEc-I	5	81913	95.7419701716		Motif:Polinton-1_TC	4	79162	94.8172813185		Motif:DNA8-3_CGi	8	51323	92.472207708		Motif:Copia-12_ST-I	3	30223	95.946031746		Motif:Jockey-4_DVi	1	70454	99.7508141017												Motif:Gypsy72-I_AG	1	2237	87.4511336982
Motif:Helitron-3_NVi	1	11654	97.4577688577		Motif:Gypsy-43_STu-LTR	5	81918	95.7478142971		Motif:Polinton-1_DGr	4	79166	94.8220723688		Motif:DNA2-6_CGi	8	51331	92.4866218627		Motif:Copia-12_Mad-I	3	30226	95.9555555556		Motif:Jockey-3_DAn	1	70455	99.7522299306												Motif:Gypsy71-I_DR	1	2238	87.4902267396
Motif:Helitron-2_Mad	1	11655	97.4661314601		Motif:Gypsy-43_DWil-I	5	81923	95.7536584226		Motif:PNL_SM	4	79170	94.8268634191		Motif:Copia-3_ES-I	8	51339	92.5010360174		Motif:Copia-115_BRa-I	3	30229	95.9650793651		Motif:Jockey-1_DK	1	70456	99.7536457596												Motif:Gypsy-6_SMo-I	1	2239	87.5293197811
Motif:Helitron-2_DVir	1	11656	97.4744940626		Motif:Gypsy-43_AMi-I	5	81928	95.759502548		Motif:piggyBac-N1_LHu	4	79174	94.8316544695		Motif:BEL-50_DRe-LTR	8	51347	92.5154501721		Motif:Copia-114_AA-I	3	30232	95.9746031746		Motif:Jockey-1_DGri	1	70457	99.7550615886												Motif:Gypsy-6_PAb-I	1	2240	87.5684128225
Motif:Helitron-1_DVir	1	11657	97.482856665		Motif:Gypsy-3_ES-I	5	81933	95.7653466735		Motif:Penelope3_XT	4	79178	94.8364455198		Motif:BEL-30_CQ-LTR	8	51355	92.5298643268		Motif:BovB_Me	3	30235	95.9841269841		Motif:ISL2EU-18_CGi	1	70458	99.7564774175												Motif:Gypsy-6_LCh-I	1	2241	87.607505864
Motif:Helitron1_Dmoj	1	11658	97.4912192674		Motif:Gypsy-3_DPu-I	5	81938	95.771190799		Motif:P-2_Hrobusta	4	79182	94.8412365701		Motif:ATHAT1	8	51363	92.5442784815		Motif:BHIKHARI-5-I_DR	3	30238	95.9936507937		Motif:ISL2EU-17_CGi	1	70459	99.7578932465												Motif:Gypsy-6_GM-I	1	2242	87.6465989054
Motif:Helitron1_AG	1	11659	97.4995818699		Motif:Gypsy-39_PT-I	5	81943	95.7770349245		Motif:Nimb-12_DR	4	79186	94.8460276204		Motif:ATENSPM10	8	51371	92.5586926362		Motif:BEL-30_CQ-LTR	3	30241	96.0031746032		Motif:ISFUN1	1	70460	99.7593090755												Motif:Gypsy-6_Ano-I	1	2243	87.6856919468
Motif:hATx-5_HM	1	11660	97.5079444723		Motif:Gypsy-39-I_NV	5	81948	95.78287905		Motif:Ngaro1_DR	4	79190	94.8508186707		Motif:U6	7	51378	92.5713050215		Motif:BEL-22_DTa-I	3	30244	96.0126984127		Motif:IS3EU-N1_CGi	1	70461	99.7607249044												Motif:Gypsy-63_MLP-I	1	2244	87.7247849883
Motif:hAT-N91_DR	1	11661	97.5163070748		Motif:Gypsy-33_DEl-I	5	81953	95.7887231755		Motif:MUDRAVI2	4	79194	94.855609721		Motif:Tx1-5_CGi	7	51385	92.5839174069		Motif:ATCopia39_I-int	3	30247	96.0222222222		Motif:IS3EU-4N_DR	1	70462	99.7621407334												Motif:Gypsy-63_DWil-I	1	2245	87.7638780297
Motif:hAT-N39_DR	1	11662	97.5246696772		Motif:Gypsy-2_PTri-I	5	81958	95.7945673009		Motif:MuDR-8_VV	4	79198	94.8604007714		Motif:Tx1-32_DR	7	51392	92.5965297923		Motif:Ambal-3_FCy	3	30250	96.0317460317		Motif:INAV_HV-int	1	70463	99.7635565624												Motif:Gypsy-63_CQ-I	1	2246	87.8029710711
Motif:hAT-N35B_DR	1	11663	97.5330322796		Motif:Gypsy-22_SB-I	5	81963	95.8004114264		Motif:MOSAT_DR	4	79202	94.8651918217		Motif:tRNA-Leu-TTG	7	51399	92.6091421776		Motif:Zator-4_HM	2	30252	96.0380952381		Motif:HeT-A3_DVi	1	70464	99.7649723913												Motif:Gypsy-605_AA-I	1	2247	87.8420641126
Motif:hAT-N22_DR	1	11664	97.5413948821		Motif:Gypsy-217_DR-I	5	81968	95.8062555519		Motif:Merlin1m_CI	4	79206	94.869982872		Motif:tRNA-Leu-TTA	7	51406	92.621754563		Motif:Waldo-4_AAe	2	30254	96.0444444444		Motif:HERVIP10FH-int	1	70465	99.7663882203												Motif:Gypsy-5_RP-I	1	2248	87.881157154
Motif:hAT-N18_DR	1	11665	97.5497574845		Motif:Gypsy-20_Gav-I	5	81973	95.8120996774		Motif:Mariner-N3_DR	4	79210	94.8747739223		Motif:R2-1_TSP	7	51413	92.6343669483		Motif:Ves2_ML	2	30256	96.0507936508		Motif:Helitron-N54_CGi	1	70466	99.7678040493												Motif:Gypsy-5_PIT-I	1	2249	87.9202501955
Motif:HATN15_DR	1	11666	97.558120087		Motif:Gypsy-193_DR-LTR	5	81978	95.8179438029		Motif:MarinerL-1_CR	4	79214	94.8795649726		Motif:piggyBac-N2A_XT	7	51420	92.6469793337		Motif:URR1a_Xt	2	30258	96.0571428571		Motif:Helitron-N3_ZM	1	70467	99.7692198782												Motif:Gypsy5-I_Dpse	1	2250	87.9593432369
Motif:hAT-N14_SBi	1	11667	97.5664826894		Motif:Gypsy18-ZM_I-int	5	81983	95.8237879284		Motif:LTR53-int	4	79218	94.8843560229		Motif:NUSIF1_TM	7	51427	92.6595917191		Motif:Tx1-12_Crp	2	30260	96.0634920635		Motif:Helitron-N2g_CGi	1	70468	99.7706357072												Motif:Gypsy-5_DWil-I	1	2251	87.9984362783
Motif:hAT-N145_DR	1	11668	97.5748452919		Motif:Gypsy-18_PBa-I	5	81988	95.8296320539		Motif:LSU-rRNA_Sce	4	79222	94.8891470733		Motif:MuDR-18_VV	7	51434	92.6722041044		Motif:TUB1	2	30262	96.0698412698		Motif:Helitron-N2_Gav	1	70469	99.7720515362												Motif:Gypsy-5_BRa-I	1	2252	88.0375293198
Motif:HAT-N12_Mad	1	11669	97.5832078943		Motif:Gypsy-17_DBi-I	5	81993	95.8354761793		Motif:LINE1-8_ZM	4	79226	94.8939381236		Motif:Mariner-N39_HSal	7	51441	92.6848164898		Motif:tRNA-Ser-TCG	2	30264	96.0761904762		Motif:Helitron-N1_AMi	1	70470	99.7734673651												Motif:Gypsy-53_MLP-I	1	2253	88.0766223612
Motif:HATN11_DR	1	11670	97.5915704967		Motif:Gypsy10-I_SP	5	81998	95.8413203048		Motif:LINE1-60_SBi	4	79230	94.8987291739		Motif:Mariner3-3_HSal	7	51448	92.6974288752		Motif:tRNACysGCA_CB	2	30266	96.0825396825		Motif:HELITRON7_OS	1	70471	99.7748831941												Motif:Gypsy-51_MLP-I	1	2254	88.1157154027
Motif:hAT-N113_DR	1	11671	97.5999330992		Motif:Ginger1-1_DR	5	82003	95.8471644303		Motif:L2_AC_13	4	79234	94.9035202242		Motif:Mariner-15_SIn	7	51455	92.7100412605		Motif:tRNA-2_DRe	2	30268	96.0888888889		Motif:Helitron-4_DR	1	70472	99.7762990231												Motif:Gypsy50-ZM_I-int	1	2255	88.1548084441
Motif:hAT-N112_DR	1	11672	97.6082957016		Motif:ERV3-1_DNo-I	5	82008	95.8530085558		Motif:L1_AC_8	4	79238	94.9083112745		Motif:LOOPERN2_DR	7	51462	92.7226536459		Motif:TND1_I-int	2	30270	96.0952380952		Motif:Helitron-3_ZM	1	70473	99.777714852												Motif:Gypsy-50_GA-I	1	2256	88.1939014855
Motif:hAT-7_PGr	1	11673	97.6166583041		Motif:ERV24_MD_I-int	5	82013	95.8588526813		Motif:L1-64_DR	4	79242	94.9131023249		Motif:L2_AC_14	7	51469	92.7352660312		Motif:TE-8_CGi	2	30272	96.1015873016		Motif:Helitron-3N2_PM	1	70474	99.779130681												Motif:Gypsy4-SM_I-int	1	2257	88.232994527
Motif:hAT-7_CPB	1	11674	97.6250209065		Motif:EnSpm-N18_DR	5	82018	95.8646968068		Motif:L1-61_ACar	4	79246	94.9178933752		Motif:HelitronN-1_DPe	7	51476	92.7478784166		Motif:TE2-4_CR	2	30274	96.1079365079		Motif:Helitron-2N_DW	1	70475	99.78054651												Motif:Gypsy-4_SCH-I	1	2258	88.2720875684
Motif:hAT-68_HM	1	11675	97.6333835089		Motif:EnSpm-3_HV	5	82023	95.8705409323		Motif:L1-59_DR	4	79250	94.9226844255		Motif:hAT-33_HM	7	51483	92.760490802		Motif:TDH5_I-int	2	30276	96.1142857143		Motif:Helitron2_CE	1	70476	99.7819623389												Motif:Gypsy-4_PPP-I	1	2259	88.3111806099
Motif:hAT-65_HM	1	11676	97.6417461114		Motif:EnSpm11_SB	5	82028	95.8763850577		Motif:L1-3_Cis	4	79254	94.9274754758		Motif:hAT-32_HM	7	51490	92.7731031873		Motif:SZ-30_LTR	2	30278	96.1206349206		Motif:Helitron-1_PGr	1	70477	99.7833781679												Motif:Gypsy-4_PPM-I	1	2260	88.3502736513
Motif:hAT-658_Ami	1	11677	97.6501087138		Motif:EnSpm-10N1_DR	5	82033	95.8822291832		Motif:L1-26B_ACar	4	79258	94.9322665261		Motif:hAT-17_Croc	7	51497	92.7857155727		Motif:STRIDM	2	30280	96.126984127		Motif:Helitron-1N1_DVir	1	70478	99.7847939969												Motif:Gypsy-4-LTR_TA	1	2261	88.3893666927
Motif:hAT6-2_NV	1	11678	97.6584713163		Motif:DIRS-4N1_DR	5	82038	95.8880733087		Motif:Kolobok-1_AA	4	79262	94.9370575764		Motif:hAT-16N2_LMi	7	51504	92.7983279581		Motif:STONOR_ZM-int	2	30282	96.1333333333		Motif:hAT-N67_DR	1	70479	99.7862098259												Motif:Gypsy-4-I_TA	1	2262	88.4284597342
Motif:HAT-4N3_Mad	1	11679	97.6668339187		Motif:DIRS-2A_XT	5	82043	95.8939174342		Motif:Kiri-1_AAe	4	79266	94.9418486268		Motif:Harbinger-N2_SP	7	51511	92.8109403434		Motif:SSU-rRNA_Tps	2	30284	96.1396825397		Motif:hAT-N54_DR	1	70480	99.7876256548												Motif:Gypsy4-I_DR	1	2263	88.4675527756
Motif:HAT4_CI	1	11680	97.6751965212		Motif:DIRS-21_ACar	5	82048	95.8997615597		Motif:KenoDr1	4	79270	94.9466396771		Motif:Gypsy-N129_SBi-LTR	7	51518	92.8235527288		Motif:Sola3-1_AA	2	30286	96.146031746		Motif:hATN-4_ACar	1	70481	99.7890414838												Motif:Gypsy-4_CPB-I	1	2264	88.506645817
Motif:hAT-43_Lch	1	11681	97.6835591236		Motif:Daphne-21_SPu	5	82053	95.9056056852		Motif:Juan-A_AA	4	79274	94.9514307274		Motif:Gypsy-55_CGi-I	7	51525	92.8361651141		Motif:Sm1	2	30288	96.1523809524		Motif:hAT-N21_DR	1	70482	99.7904573128												Motif:Gypsy-49_BG-I	1	2265	88.5457388585
Motif:hAT-2_TS	1	11682	97.691921726		Motif:Copia-70_ZM-I	5	82058	95.9114498107		Motif:Jockey-5_DPer	4	79278	94.9562217777		Motif:Gypsy-2_PMar-I	7	51532	92.8487774995		Motif:SKIPPER_int-int	2	30290	96.1587301587		Motif:hATm-47_HM	1	70483	99.7918731417												Motif:Gypsy-47_STu-I	1	2266	88.5848318999
Motif:hAT-25_DR	1	11683	97.7002843285		Motif:Copia-5_SCH-I	5	82063	95.9172939361		Motif:Jockey-1_DK	4	79282	94.961012828		Motif:Gypsy-13_RO-I	7	51539	92.8613898849		Motif:SINE_VV	2	30292	96.1650793651		Motif:hAT-6_PTr	1	70484	99.7932889707												Motif:Gypsy-47_PAb-I	1	2267	88.6239249414
Motif:hAT-24_DR	1	11684	97.7086469309		Motif:Copia-44_PIT-I	5	82068	95.9231380616		Motif:Jockey-15_DBp	4	79286	94.9658038784		Motif:EnSpm-16_DR	7	51546	92.8740022702		Motif:SAT-1_PVa	2	30294	96.1714285714		Motif:hAT-1_DP	1	70485	99.7947047997												Motif:Gypsy46-ZM_I-int	1	2268	88.6630179828
Motif:hAT-20_SM	1	11685	97.7170095334		Motif:Copia-3-I_NV	5	82073	95.9289821871		Motif:Jockey-13_AAe	4	79290	94.9705949287		Motif:EnSpm-10_DR	7	51553	92.8866146556		Motif:RTEX-2_DR	2	30296	96.1777777778		Motif:hAT-16N2_LMi	1	70486	99.7961206286												Motif:Gypsy-46_MLP-I	1	2269	88.7021110242
Motif:hAT-1_TV	1	11686	97.7253721358		Motif:Copia-26_DPu-I	5	82078	95.9348263126		Motif:ISL2EU-N5B_CGi	4	79294	94.975385979		Motif:DNA-5-2_DR	7	51560	92.899227041		Motif:RNLTR2d	2	30298	96.1841269841		Motif:hAT-13_DR	1	70487	99.7975364576												Motif:Gypsy-44_Mad-I	1	2270	88.7412040657
Motif:hAT-1_PBa	1	11687	97.7337347383		Motif:Copia17-NVi_I-int	5	82083	95.9406704381		Motif:I-1_DF	4	79298	94.9801770293		Motif:DIP0	7	51567	92.9118394263		Motif:RMER17C2	2	30300	96.1904761905		Motif:Harbinger-N4_NV	1	70488	99.7989522866												Motif:Gypsy44-I_AG	1	2271	88.7802971071
Motif:hAT-1_LU	1	11688	97.7420973407		Motif:BovB_Me	5	82088	95.9465145636		Motif:HELMET3	4	79302	94.9849680796		Motif:Daphne-78_HMa	7	51574	92.9244518117		Motif:RMER12C	2	30302	96.1968253968		Motif:Harbinger-N12_DR	1	70489	99.8003681155												Motif:Gypsy-43-I_NV	1	2272	88.8193901486
Motif:hAT1_Laf	1	11689	97.7504599431		Motif:ATCopia72_I-int	5	82093	95.952358689		Motif:HELITRON7_CB	4	79306	94.9897591299		Motif:CSINE2	7	51581	92.937064197		Motif:RLTR20A4	2	30304	96.2031746032		Motif:Harbinger-5_PSt	1	70490	99.8017839445												Motif:Gypsy-43_BD-I	1	2273	88.85848319
Motif:hAT-1_EI	1	11690	97.7588225456		Motif:5SrRNA-1_BG	5	82098	95.9582028145		Motif:HELITRON4_OS	4	79310	94.9945501803		Motif:CR1-51_DR	7	51588	92.9496765824		Motif:RLG_scIvana_1_1-I	2	30306	96.2095238095		Motif:Harbinger4_TP	1	70491	99.8031997735												Motif:Gypsy-42_AMi-I	1	2274	88.8975762314
Motif:hAT-17_Croc	1	11691	97.767185148		Motif:Vandal8	4	82102	95.9628781149		Motif:Helitron-3_PM	4	79314	94.9993412306		Motif:Copia-7_DPu-I	7	51595	92.9622889678		Motif:REP-6_PBa	2	30308	96.2158730159		Motif:Harbinger-2F_CPB	1	70492	99.8046156024												Motif:Gypsy-40_Mad-I	1	2275	88.9366692729
Motif:hAT-15_HM	1	11692	97.7755477505		Motif:Vandal1N1	4	82106	95.9675534153		Motif:Helitron-2_HM	4	79318	95.0041322809		Motif:Copia-50_PIT-I	7	51602	92.9749013531		Motif:REP-1_DTa	2	30310	96.2222222222		Motif:Harbinger-2_DR	1	70493	99.8060314314												Motif:Gypsy-3_XT-I	1	2276	88.9757623143
Motif:Harbinger-N5A_NV	1	11693	97.7839103529		Motif:U6	4	82110	95.9722287157		Motif:Helitron-2_DVir	4	79322	95.0089233312		Motif:Copia15-VV_I-int	7	51609	92.9875137385		Motif:R2Sm-A	2	30312	96.2285714286		Motif:Harbinger2-2_NV	1	70494	99.8074472604												Motif:Gypsy-3_RP-I	1	2277	89.0148553557
Motif:Harbinger-N16_DR	1	11694	97.7922729553		Motif:Tx1-12_Crp	4	82114	95.9769040161		Motif:hATx-20_SM	4	79326	95.0137143815		Motif:BEL-13_LH-I	7	51616	93.0001261239		Motif:polypurine	2	30314	96.2349206349		Motif:Harbinger-1_LCh	1	70495	99.8088630893												Motif:Gypsy-3_PBa-I	1	2278	89.0539483972
Motif:Harbinger-N15_DR	1	11695	97.8006355578		Motif:TUBE2	4	82118	95.9815793165		Motif:hAT-N36C_DR	4	79330	95.0185054319		Motif:ALPINE1B	7	51623	93.0127385092		Motif:Polinton-5_SP	2	30316	96.2412698413		Motif:Gypsy-9_PX-I	1	70496	99.8102789183												Motif:Gypsy3-LTR_AP	1	2279	89.0930414386
Motif:Harbinger-6_LCh	1	11696	97.8089981602		Motif:tRNA-Tyr-TAC	4	82122	95.9862546169		Motif:hAT-N21_DR	4	79334	95.0232964822		Motif:Tx1-5_PM	6	51629	93.0235491252		Motif:Polinton-4_PBa	2	30318	96.2476190476		Motif:Gypsy-96_SB-I	1	70497	99.8116947473												Motif:Gypsy-3_DWil-I	1	2280	89.1321344801
Motif:Harbinger-5_PGr	1	11697	97.8173607627		Motif:tRNA-Ser-TCG	4	82126	95.9909299172		Motif:HATN17_DR	4	79338	95.0280875325		Motif:Tx1-33_DR	6	51635	93.0343597413		Motif:Polinton-2A_NV	2	30320	96.253968254		Motif:Gypsy8-ZM_I-int	1	70498	99.8131105762												Motif:Gypsy-3_DPer-I	1	2281	89.1712275215
Motif:Harbinger3_DR	1	11698	97.8257233651		Motif:tRNAIleATT_CB	4	82130	95.9956052176		Motif:hATm-47_HM	4	79342	95.0328785828		Motif:tRNA-2_DRe	6	51641	93.0451703573		Motif:PlatLTR35a-int	2	30322	96.2603174603		Motif:Gypsy-8_DAn-LTR	1	70499	99.8145264052												Motif:Gypsy-3_BD-I	1	2282	89.2103205629
Motif:Harbinger-2_XT	1	11699	97.8340859676		Motif:Transib-16_HM	4	82134	96.000280518		Motif:hATm-15_HM	4	79346	95.0376696331		Motif:TDR13	6	51647	93.0559809733		Motif:piggyBac-N6_SP	2	30324	96.2666666667		Motif:Gypsy-86_SB-I	1	70500	99.8159422342												Motif:Gypsy-39_DPu-I	1	2283	89.2494136044
Motif:Harbinger2-2_ES	1	11700	97.84244857		Motif:Sola1-1_Smoe	4	82138	96.0049558184		Motif:hAT-6_PTr	4	79350	95.0424606834		Motif:RTEX-2_DR	6	51653	93.0667915893		Motif:Ogre-PT3_I-int	2	30326	96.273015873		Motif:Gypsy-81_PAb-I	1	70501	99.8173580631												Motif:Gypsy-39_CPB-LTR	1	2284	89.2885066458
Motif:HARB-6_ALy	1	11701	97.8508111724		Motif:RLTR31D_MM	4	82142	96.0096311188		Motif:hAT-6_DR	4	79354	95.0472517338		Motif:RTEX-15_CGi	6	51659	93.0776022054		Motif:MuSHAN_MT	2	30328	96.2793650794		Motif:Gypsy-7_CPB-I	1	70502	99.8187738921												Motif:Gypsy-38_DWil-I	1	2285	89.3275996873
Motif:HARB5_ZM	1	11702	97.8591737749		Motif:RLTR20A3_MM	4	82146	96.0143064192		Motif:HAT6_CB	4	79358	95.0520427841		Motif:RMER17C2	6	51665	93.0884128214		Motif:MuDR-10_GM	2	30330	96.2857142857		Motif:Gypsy6-I_VC	1	70503	99.8201897211												Motif:Gypsy-37_NVi-I	1	2286	89.3666927287
Motif:HAL1-2a_MD	1	11703	97.8675363773		Motif:QUASIMODO_I-int	4	82150	96.0189817196		Motif:hAT-5_LCh	4	79362	95.0568338344		Motif:RMER17A	6	51671	93.0992234374		Motif:Mf3_MF	2	30332	96.2920634921		Motif:Gypsy65-I_DR	1	70504	99.82160555												Motif:Gypsy-36_DEl-I	1	2287	89.4057857701
Motif:HAL1-1H_Cpo	1	11704	97.8758989798		Motif:Polinton-1_XT	4	82154	96.02365702		Motif:hAT-2_SD	4	79366	95.0616248847		Motif:RMER12C	6	51677	93.1100340534		Motif:Merlin-1_Aplcal	2	30334	96.2984126984		Motif:Gypsy-62-I_NV	1	70505	99.823021379												Motif:Gypsy-35_ST-I	1	2288	89.4448788116
Motif:GYZMA2_I-int	1	11705	97.8842615822		Motif:Polinton-1_SM	4	82158	96.0283323204		Motif:hAT-26_ZM	4	79370	95.066415935		Motif:Rehavkus-2_HR	6	51683	93.1208446695		Motif:MER4B-int	2	30336	96.3047619048		Motif:Gypsy-5_PR-LTR	1	70506	99.824437208												Motif:Gypsy-35_Mad-I	1	2289	89.483971853
Motif:Gypsy-9_PSH-I	1	11706	97.8926241846		Motif:Polinton-1_LCh	4	82162	96.0330076207		Motif:hAT-25_DR	4	79374	95.0712069854		Motif:Proto1-3_NG	6	51689	93.1316552855		Motif:MdoLTR3-int	2	30338	96.3111111111		Motif:Gypsy-5_PR-I	1	70507	99.825853037												Motif:Gypsy-34_SB-I	1	2290	89.5230648944
Motif:Gypsy-9_PIT-LTR	1	11707	97.9009867871		Motif:Pigibakku	4	82166	96.0376829211		Motif:hAT-17_Croc	4	79378	95.0759980357		Motif:Polinton-2_NV	6	51695	93.1424659015		Motif:Mariner-N6_PM	2	30340	96.3174603175		Motif:Gypsy58-I_AG	1	70508	99.8272688659												Motif:Gypsy-34_Mad-I	1	2291	89.5621579359
Motif:Gypsy-9_DMoj-LTR	1	11708	97.9093493895		Motif:piggyBac-21_SM	4	82170	96.0423582215		Motif:Harbinger-N16_DR	4	79382	95.080789086		Motif:MuDR-7_GM	6	51701	93.1532765175		Motif:Mariner-N5_DR	2	30342	96.3238095238		Motif:Gypsy-56_PM-LTR	1	70509	99.8286846949												Motif:Gypsy-33_ST-I	1	2292	89.6012509773
Motif:Gypsy-92_ZM-I	1	11709	97.917711992		Motif:Pifo_I-int	4	82174	96.0470335219		Motif:Harbinger-7_PGr	4	79386	95.0855801363		Motif:MuDR-6_GM	6	51707	93.1640871336		Motif:Mariner-N1B_CGi	2	30344	96.3301587302		Motif:Gypsy-51_GA-LTR	1	70510	99.8301005239												Motif:Gypsy-33-I_NVi	1	2293	89.6403440188
Motif:Gypsy-8_RP-LTR	1	11710	97.9260745944		Motif:MuDR-7_ZM	4	82178	96.0517088223		Motif:Harbinger-5_DR	4	79390	95.0903711866		Motif:MuDR-22_VV	6	51713	93.1748977496		Motif:Mariner-62_HSal	2	30346	96.3365079365		Motif:Gypsy-50_PIT-I	1	70511	99.8315163528												Motif:Gypsy-31_MLP-I	1	2294	89.6794370602
Motif:Gypsy-8_PAb-I	1	11711	97.9344371969		Motif:MuDR-5_VV	4	82182	96.0563841227		Motif:Harbinger-3_BF	4	79394	95.0951622369		Motif:Mf3_MF	6	51719	93.1857083656		Motif:Mariner3-3_HSal	2	30348	96.3428571429		Motif:Gypsy4-I_VC	1	70512	99.8329321818												Motif:Gypsy-30_DYa-I	1	2295	89.7185301016
Motif:Gypsy-8_DAn-LTR	1	11712	97.9427997993		Motif:MuDR-5_EPa	4	82186	96.0610594231		Motif:HARB-4N1_Mad	4	79398	95.0999532873		Motif:MERMITE18D	6	51725	93.1965189816		Motif:Mariner-2_SLL	2	30350	96.3492063492		Motif:Gypsy-48_ZM-I	1	70513	99.8343480108												Motif:Gypsy-2_Trm-I	1	2296	89.7576231431
Motif:Gypsy-8_AA-I	1	11713	97.9511624017		Motif:MuDR-18_VV	4	82190	96.0657347235		Motif:Gypsy-I_MT	4	79402	95.1047443376		Motif:MDG1_LTR	6	51731	93.2073295977		Motif:LTR51D_MD	2	30352	96.3555555556		Motif:Gypsy-47_CGi-I	1	70514	99.8357638397												Motif:Gypsy-2_RO-I	1	2297	89.7967161845
Motif:Gypsy-83_CGi-I	1	11714	97.9595250042		Motif:MERMITE18D	4	82194	96.0704100238		Motif:Gypsy-9_PBa-I	4	79406	95.1095353879		Motif:Mariner-N22_HSal	6	51737	93.2181402137		Motif:LTR-12D_Gav	2	30354	96.3619047619		Motif:Gypsy-46_DEl-LTR	1	70515	99.8371796687												Motif:Gypsy-2_PX-I	1	2298	89.835809226
Motif:Gypsy-81_PAb-I	1	11715	97.9678876066		Motif:Mariner-68_HSal	4	82198	96.0750853242		Motif:Gypsy-9-I_CR	4	79410	95.1143264382		Motif:Mariner-N10_SIn	6	51743	93.2289508297		Motif:LSU-rRNA_Ath	2	30356	96.3682539683		Motif:Gypsy-42_PIT-I	1	70516	99.8385954977												Motif:Gypsy-2_EPa-I	1	2299	89.8749022674
Motif:Gypsy81-I_Dr	1	11716	97.9762502091		Motif:Mariner-19_HSal	4	82202	96.0797606246		Motif:Gypsy-9_DTa-I	4	79414	95.1191174885		Motif:Mariner-68_HSal	6	51749	93.2397614457		Motif:L2_AC_6	2	30358	96.3746031746		Motif:Gypsy-3_PR-I	1	70517	99.8400113266												Motif:Gypsy-29_Mad-I	1	2300	89.9139953088
Motif:Gypsy-80-I_ZM	1	11717	97.9846128115		Motif:LTR66	4	82206	96.084435925		Motif:Gypsy-9_DPu-I	4	79418	95.1239085388		Motif:Mariner-19_HSal	6	51755	93.2505720618		Motif:L2_AC_11	2	30360	96.380952381		Motif:Gypsy-3_PBa-I	1	70518	99.8414271556												Motif:Gypsy-29_DWil-I	1	2301	89.9530883503
Motif:Gypsy-7-I_NV	1	11718	97.9929754139		Motif:LTR-2_Mad-I	4	82210	96.0891112254		Motif:Gypsy-8_HMM-LTR	4	79422	95.1286995892		Motif:LTR2C_Opr	6	51761	93.2613826778		Motif:L2-22_ACar	2	30362	96.3873015873		Motif:Gypsy-3_Mad-LTR	1	70519	99.8428429846												Motif:Gypsy-28_SI-I	1	2302	89.9921813917
Motif:Gypsy70-I_DR	1	11719	98.0013380164		Motif:LTR160B_MD	4	82214	96.0937865258		Motif:Gypsy77-I_DR	4	79426	95.1334906395		Motif:LTR-12D_Crp	6	51767	93.2721932938		Motif:L2-1_BM	2	30364	96.3936507937		Motif:Gypsy-3_DRh-I	1	70520	99.8442588135												Motif:Gypsy-27_VV-LTR	1	2303	90.0312744332
Motif:Gypsy6-NVi_I-int	1	11720	98.0097006188		Motif:LSU-rRNA_Hsa	4	82218	96.0984618262		Motif:Gypsy-71_CGi-I	4	79430	95.1382816898		Motif:LSU-rRNA_Dme	6	51773	93.2830039098		Motif:L1MC4a	2	30366	96.4		Motif:Gypsy-37_NVi-I	1	70521	99.8456746425												Motif:Gypsy-27_GA-I	1	2304	90.0703674746
Motif:Gypsy-6_BG-I	1	11721	98.0180632213		Motif:LSU-rRNA_Dme	4	82222	96.1031371266		Motif:Gypsy-70_CGi-I	4	79434	95.1430727401		Motif:L2B-4B_AAe	6	51779	93.2938145259		Motif:L1-65_DR	2	30368	96.4063492063		Motif:Gypsy-37_CQ-I	1	70522	99.8470904715												Motif:Gypsy-26-I_NVi	1	2305	90.109460516
Motif:Gypsy-66_SB-I	1	11722	98.0264258237		Motif:LSU-rRNA_Ath	4	82226	96.1078124269		Motif:Gypsy-64_BG-I	4	79438	95.1478637904		Motif:L2_AC_11	6	51785	93.3046251419		Motif:L1-60_DR	2	30370	96.4126984127		Motif:Gypsy-35_SB-I	1	70523	99.8485063004												Motif:Gypsy-26_GM-I	1	2306	90.1485535575
Motif:Gypsy66-I_AG	1	11723	98.0347884262		Motif:LOOPERN3B_DR	4	82230	96.1124877273		Motif:Gypsy61-I_DR	4	79442	95.1526548408		Motif:L2-16_NVe	6	51791	93.3154357579		Motif:L1-3_Cpo	2	30372	96.419047619		Motif:Gypsy-35_CQ-I	1	70524	99.8499221294												Motif:Gypsy-26_DPse-LTR	1	2307	90.1876465989
Motif:Gypsy65-ZM_I-int	1	11724	98.0431510286		Motif:LINE1-15_SBi	4	82234	96.1171630277		Motif:Gypsy-5_RO-I	4	79446	95.1574458911		Motif:L1-56_XT	6	51797	93.3262463739		Motif:L1-2_STu	2	30374	96.4253968254		Motif:Gypsy-33_GM-I	1	70525	99.8513379584												Motif:Gypsy-24-I_NVi	1	2308	90.2267396403
Motif:Gypsy-63_CQ-I	1	11725	98.051513631		Motif:L1_Ele5	4	82238	96.1218383281		Motif:Gypsy-5_DKi-I	4	79450	95.1622369414		Motif:L1-39_DR	6	51803	93.33705699		Motif:L1-21B_ACar	2	30376	96.4317460317		Motif:Gypsy-32_ADe-I	1	70526	99.8527537873												Motif:Gypsy-24_DEl-I	1	2309	90.2658326818
Motif:Gypsy61-I_AG	1	11726	98.0598762335		Motif:L1_AC_8	4	82242	96.1265136285		Motif:Gypsy-52_BG-I	4	79454	95.1670279917		Motif:Jockey-3_DPer	6	51809	93.347867606		Motif:L1-103_DR	2	30378	96.4380952381		Motif:Gypsy-30_SI-I	1	70527	99.8541696163												Motif:Gypsy-24_CQ-I	1	2310	90.3049257232
Motif:Gypsy-5_IS-I	1	11727	98.0682388359		Motif:L1_AC_16	4	82246	96.1311889289		Motif:Gypsy-46_GA-I	4	79458	95.171819042		Motif:Jockey-2_DGri	6	51815	93.358678222		Motif:Kolobok-10N1_CGi	2	30380	96.4444444444		Motif:Gypsy-30_ADe-I	1	70528	99.8555854453												Motif:Gypsy-24_CGi-I	1	2311	90.3440187647
Motif:Gypsy5-I_AG	1	11728	98.0766014384		Motif:L1-3_PAb	4	82250	96.1358642293		Motif:Gypsy-44_PAb-I	4	79462	95.1766100923		Motif:ISL2EU-3_CFl	6	51821	93.369488838		Motif:IS4EU-2_DR	2	30382	96.4507936508		Motif:Gypsy-2-I_TA	1	70529	99.8570012742												Motif:Gypsy-249_AA-I	1	2312	90.3831118061
Motif:Gypsy-54_DWil-I	1	11729	98.0849640408		Motif:Kolobok-N1_PBa	4	82254	96.1405395297		Motif:Gypsy-37_CQ-I	4	79466	95.1814011427		Motif:HP_FR2	6	51827	93.3802994541		Motif:IS3EU-4N_DR	2	30384	96.4571428571		Motif:Gypsy2-I_MT	1	70530	99.8584171032												Motif:Gypsy-23_VV-I	1	2313	90.4222048475
Motif:Gypsy-53_PM-LTR	1	11730	98.0933266433		Motif:KibiFr1	4	82258	96.1452148301		Motif:Gypsy-29-I_NVi	4	79470	95.186192193		Motif:HERVFH21-int	6	51833	93.3911100701		Motif:HelitronY1D	2	30386	96.4634920635		Motif:Gypsy-2_DFa-I	1	70531	99.8598329322												Motif:Gypsy-23_PSo-I	1	2314	90.461297889
Motif:Gypsy53-I_DR	1	11731	98.1016892457		Motif:Jockey-6_DK	4	82262	96.1498901304		Motif:Gypsy-241_AA-I	4	79474	95.1909832433		Motif:Helitron-N3_DT	6	51839	93.4019206861		Motif:Helitron-N3_PPa	2	30388	96.4698412698		Motif:Gypsy-29_DYa-I	1	70532	99.8612487611												Motif:Gypsy-23-I_DR	1	2315	90.5003909304
Motif:Gypsy-50_GA-LTR	1	11732	98.1100518481		Motif:IS3EU-N2_CGi	4	82266	96.1545654308		Motif:Gypsy-1-I_MH	4	79478	95.1957742936		Motif:Helitron-N2_CGi	6	51845	93.4127313021		Motif:Helitron-N3_PBa	2	30390	96.4761904762		Motif:Gypsy-28_SI-I	1	70533	99.8626645901												Motif:Gypsy-22_SB-I	1	2316	90.5394839719
Motif:Gypsy-4_TMe-I	1	11733	98.1184144506		Motif:Helitron-N46_CGi	4	82270	96.1592407312		Motif:Gypsy-18_DEl-I	4	79482	95.2005653439		Motif:Helitron-2_DVir	6	51851	93.4235419182		Motif:Helitron-N12_NV	2	30392	96.4825396825		Motif:Gypsy27-ZM_I-int	1	70534	99.8640804191												Motif:Gypsy-21_PGr-LTR	1	2317	90.5785770133
Motif:Gypsy4-I_Dmoj	1	11734	98.126777053		Motif:Helitron-3_ZM	4	82274	96.1639160316		Motif:Gypsy-18_DBp-I	4	79486	95.2053563943		Motif:hATa-1_EHux	6	51857	93.4343525342		Motif:HE1_HJ	2	30394	96.4888888889		Motif:Gypsy-27_ADe-I	1	70535	99.8654962481												Motif:Gypsy-21_DAn-LTR	1	2318	90.6176700547
Motif:Gypsy-4_CP-I	1	11735	98.1351396555		Motif:Helitron-2_Mad	4	82278	96.168591332		Motif:Gypsy-131_DR-I	4	79490	95.2101474446		Motif:HAT-4_Mad	6	51863	93.4451631502		Motif:hAT-N36C_DR	2	30396	96.4952380952		Motif:Gypsy-25_SB-I	1	70536	99.866912077												Motif:Gypsy-217_DR-I	1	2319	90.6567630962
Motif:Gypsy-4_CFl-LTR	1	11736	98.1435022579		Motif:hAT-N36_DR	4	82282	96.1732666324		Motif:Gypsy124-LTR_DR	4	79494	95.2149384949		Motif:hAT-21N2_LMi	6	51869	93.4559737662		Motif:hATm-33_HM	2	30398	96.5015873016		Motif:Gypsy-23_PSo-I	1	70537	99.868327906												Motif:Gypsy-20_PGr-I	1	2320	90.6958561376
Motif:Gypsy47-I_DR	1	11737	98.1518648603		Motif:hAT-N34_DR	4	82286	96.1779419328		Motif:Gypsy-10_PPa-I	4	79498	95.2197295452		Motif:hAT-1_DP	6	51875	93.4667843823		Motif:hATm-31_HM	2	30400	96.5079365079		Motif:Gypsy-22_DWil-LTR	1	70538	99.869743735												Motif:Gypsy20-LTR_SP	1	2321	90.734949179
Motif:Gypsy-47_BD-I	1	11738	98.1602274628		Motif:hAT-N2_ALy	4	82290	96.1826172332		Motif:Gypsy-10_PBa-LTR	4	79502	95.2245205955		Motif:hAT-1960_Ami	6	51881	93.4775949983		Motif:hATm-22_HM	2	30402	96.5142857143		Motif:Gypsy-21_SCH-I	1	70539	99.8711595639												Motif:Gypsy20-I_Dpse	1	2322	90.7740422205
Motif:Gypsy46-I_DR	1	11739	98.1685900652		Motif:hAT-N13_AMi	4	82294	96.1872925335		Motif:Gypsy-10_CGi-I	4	79506	95.2293116458		Motif:Harbinger-5_PSt	6	51887	93.4884056143		Motif:hATa-1_EHux	2	30404	96.5206349206		Motif:Gypsy-209_AA-I	1	70540	99.8725753929												Motif:Gypsy-20_BD-I	1	2323	90.8131352619
Motif:Gypsy-42_PAb-LTR	1	11740	98.1769526677		Motif:HATN11_DR	4	82298	96.1919678339		Motif:FASAT	4	79510	95.2341026962		Motif:HARB-8_ALy	6	51893	93.4992162303		Motif:HAT-8_Mad	2	30406	96.526984127		Motif:Gypsy-208_AA-I	1	70541	99.8739912219												Motif:Gypsy-202_DR-I	1	2324	90.8522283034
Motif:Gypsy42-I_AG	1	11741	98.1853152701		Motif:hAT-5_LCh	4	82302	96.1966431343		Motif:EnSpm-N1_TD	4	79514	95.2388937465		Motif:Gypsy71-I_DR	6	51899	93.5100268464		Motif:hAT-5_SBi	2	30408	96.5333333333		Motif:Gypsy-1_NG-I	1	70542	99.8754070508												Motif:Gypsy-1_SCH-I	1	2325	90.8913213448
Motif:Gypsy-42_BG-I	1	11742	98.1936778726		Motif:HAT-4_Mad	4	82306	96.2013184347		Motif:EnSpm-N15_DR	4	79518	95.2436847968		Motif:Gypsy-6_AEc-I	6	51905	93.5208374624		Motif:hAT-4_PTr	2	30410	96.5396825397		Motif:Gypsy-1_DSe-LTR	1	70543	99.8768228798												Motif:Gypsy-1_PCR-I	1	2326	90.9304143862
Motif:Gypsy-42_AMi-I	1	11743	98.202040475		Motif:hAT-21N2_LMi	4	82310	96.2059937351		Motif:EnSpm-20_HMa	4	79522	95.2484758471		Motif:Gypsy-23_VV-I	6	51911	93.5316480784		Motif:hAT-333_Crp	2	30412	96.546031746		Motif:Gypsy-1_CMe-I	1	70544	99.8782387088												Motif:Gypsy-1_LJ-I	1	2327	90.9695074277
Motif:Gypsy-40_Mad-I	1	11744	98.2104030774		Motif:hAT-1_DP	4	82314	96.2106690355		Motif:EnSpm-19_HMa	4	79526	95.2532668974		Motif:Gypsy-22_DY-LTR	6	51917	93.5424586944		Motif:hAT-29_DR	2	30414	96.5523809524		Motif:Gypsy-196_ZM-I	1	70545	99.8796545377												Motif:Gypsy1-I_TP	1	2328	91.0086004691
Motif:Gypsy40-LTR_DR	1	11745	98.2187656799		Motif:Harbinger-6_LCh	4	82318	96.2153443359		Motif:EnSpm-16_ZM	4	79530	95.2580579478		Motif:Gypsy-220_AA-I	6	51923	93.5532693105		Motif:HAT-13_Mad	2	30416	96.5587301587		Motif:Gypsy-193_DR-LTR	1	70546	99.8810703667												Motif:Gypsy1-I_ST	1	2329	91.0476935106
Motif:Gypsy-37_PT-LTR	1	11746	98.2271282823		Motif:Harbinger-4_XT	4	82322	96.2200196363		Motif:EnSpm-16_DR	4	79534	95.2628489981		Motif:Gypsy-14_PBa-I	6	51929	93.5640799265		Motif:Harbinger-4_XT	2	30418	96.5650793651		Motif:Gypsy18-I_CR	1	70547	99.8824861957												Motif:Gypsy1-I_SP	1	2330	91.086786552
Motif:Gypsy-37_NVi-I	1	11747	98.2354908848		Motif:Harbinger2-2_ES	4	82326	96.2246949366		Motif:EnSpm-10N1_DR	4	79538	95.2676400484		Motif:Gypsy-116-LTR_DR	6	51935	93.5748905425		Motif:Harbinger2-2_ES	2	30420	96.5714285714		Motif:Gypsy-17_PR-LTR	1	70548	99.8839020246												Motif:Gypsy1-I_GA	1	2331	91.1258795934
Motif:Gypsy-36_PAb-I	1	11748	98.2438534872		Motif:HAL1-3_ME	4	82330	96.229370237		Motif:DRE	4	79542	95.2724310987		Motif:ERV6_MD_I-int	6	51941	93.5857011585		Motif:Harbinger	2	30422	96.5777777778		Motif:Gypsy-17_CFl-LTR	1	70549	99.8853178536												Motif:Gypsy-1-I_DD	1	2332	91.1649726349
Motif:Gypsy-35_CGi-I	1	11749	98.2522160896		Motif:Gypsy-9_DTa-I	4	82334	96.2340455374		Motif:DOC2_DM	4	79546	95.277222149		Motif:EnSpm-9_OS	6	51947	93.5965117746		Motif:Gypsy-9_PBa-I	2	30424	96.5841269841		Motif:Gypsy-172_AA-I	1	70550	99.8867336826												Motif:Gypsy1GM_I-int	1	2333	91.2040656763
Motif:Gypsy-34_CGi-I	1	11750	98.2605786921		Motif:Gypsy-92_ZM-I	4	82338	96.2387208378		Motif:DNA9-6_DR	4	79550	95.2820131993		Motif:EnSpm-6_FV	6	51953	93.6073223906		Motif:Gypsy-6_AEc-LTR	2	30426	96.5904761905		Motif:Gypsy-16_PSo-I	1	70551	99.8881495115												Motif:Gypsy-1_GM-I	1	2334	91.2431587177
Motif:Gypsy33-ZM_I-int	1	11751	98.2689412945		Motif:Gypsy-8_PIT-I	4	82342	96.2433961382		Motif:DNA9-5_DR	4	79554	95.2868042497		Motif:EnSpm-3_VV	6	51959	93.6181330066		Motif:Gypsy-41_DEl-I	2	30428	96.5968253968		Motif:Gypsy-15_Ano-I	1	70552	99.8895653405												Motif:Gypsy-1_DTa-I	1	2335	91.2822517592
Motif:Gypsy-33-LTR_DR	1	11752	98.277303897		Motif:Gypsy-81_CQ-I	4	82346	96.2480714386		Motif:DNA8-21_DR	4	79558	95.2915953		Motif:EnSpm2_SB	6	51965	93.6289436226		Motif:Gypsy-23_DEl-I	2	30430	96.6031746032		Motif:Gypsy-137_GM-I	1	70553	99.8909811695												Motif:Gypsy-1_DBi-I	1	2336	91.3213448006
Motif:Gypsy-32_BG-I	1	11753	98.2856664994		Motif:Gypsy-7_CFl-I	4	82350	96.252746739		Motif:DNA8-12_CB	4	79562	95.2963863503		Motif:DNA-1_FV	6	51971	93.6397542387		Motif:Gypsy-1_AC-I	2	30432	96.6095238095		Motif:Gypsy12-ZM_I-int	1	70554	99.8923969984												Motif:Gypsy-1_CMe-LTR	1	2337	91.3604378421
Motif:Gypsy2-SB_I-int	1	11754	98.2940291019		Motif:Gypsy-77_CQ-I	4	82354	96.2574220394		Motif:DNA3-6_STu	4	79566	95.3011774006		Motif:DIRS-30_NV	6	51977	93.6505648547		Motif:Gypsy-184_ZM-I	2	30434	96.6158730159		Motif:Gypsy12-I_VC	1	70555	99.8938128274												Motif:Gypsy-19_SB-I	1	2338	91.3995308835
Motif:Gypsy-2_RP-I	1	11755	98.3023917043		Motif:Gypsy-64-I_NV	4	82358	96.2620973398		Motif:DNA2-5_DR	4	79570	95.3059684509		Motif:Copia-23_Mad-I	6	51983	93.6613754707		Motif:Gypsy-14_GA-LTR	2	30436	96.6222222222		Motif:Gypsy11-I_VC	1	70556	99.8952286564												Motif:Gypsy19-I_CR	1	2339	91.4386239249
Motif:Gypsy2-I_MT	1	11756	98.3107543067		Motif:Gypsy-62-I_NV	4	82362	96.2667726401		Motif:DNA2-1_DR	4	79574	95.3107595013		Motif:Copia-1_ST-I	6	51989	93.6721860867		Motif:Gypsy-11-I_CR	2	30438	96.6285714286		Motif:Gypsy-11_DPu-I	1	70557	99.8966444853												Motif:Gypsy-193_AA-I	1	2340	91.4777169664
Motif:Gypsy-2_DPu-I	1	11757	98.3191169092		Motif:Gypsy-612_AA-I	4	82366	96.2714479405		Motif:DMSAT6	4	79578	95.3155505516		Motif:BEL-2-I_NVi	6	51995	93.6829967028		Motif:Gypsy-119_GM-I	2	30440	96.6349206349		Motif:Gypsy-118_ZM-I	1	70558	99.8980603143												Motif:Gypsy18-PTR_I-int	1	2341	91.5168100078
Motif:Gypsy-2_BRa-I	1	11758	98.3274795116		Motif:Gypsy-4_PPc-I	4	82370	96.2761232409		Motif:DIRS-6B_DR	4	79582	95.3203416019		Motif:AC9_ZM	6	52001	93.6938073188		Motif:Gypsy10-I_AG	2	30442	96.6412698413		Motif:GGLTR12A	1	70559	99.8994761433												Motif:Gypsy-18_PAb-I	1	2342	91.5559030493
Motif:Gypsy-29_Adi-I	1	11759	98.3358421141		Motif:Gypsy-45_AA-I	4	82374	96.2807985413		Motif:Daphne-38_HMa	4	79586	95.3251326522		Motif:Zisupton-5_DR	5	52006	93.7028161655		Motif:Ginger2-1_LS	2	30444	96.6476190476		Motif:ERV-3_AMi-LTR	1	70560	99.9008919722												Motif:Gypsy-18-I_XT	1	2343	91.5949960907
Motif:Gypsy-26_XT-LTR	1	11760	98.3442047165		Motif:Gypsy37-I_AG	4	82378	96.2854738417		Motif:Crypton-2_NV	4	79590	95.3299237025		Motif:YOYO_I-int	5	52011	93.7118250122		Motif:Ginger1-2_DR	2	30446	96.653968254		Motif:ERV-1_PM-LTR	1	70561	99.9023078012												Motif:Gypsy-18_DEl-I	1	2344	91.6340891321
Motif:Gypsy-26-I_NVi	1	11761	98.3525673189		Motif:Gypsy-36_MLP-I	4	82382	96.2901491421		Motif:Crack-2_CP	4	79594	95.3347147528		Motif:Tx1-4_SK	5	52016	93.7208338588		Motif:GGLTR3B4	2	30448	96.6603174603		Motif:ERV-1_CPB-LTR	1	70562	99.9037236302												Motif:Gypsy-18_ADe-I	1	2345	91.6731821736
Motif:Gypsy-26_DPse-I	1	11762	98.3609299214		Motif:Gypsy-33_Mad-I	4	82386	96.2948244425		Motif:CR1-9_NV	4	79598	95.3395058032		Motif:Tx1-43_DR	5	52021	93.7298427055		Motif:Galileo_DB	2	30450	96.6666666667		Motif:ERV1-4-EC_I-int	1	70563	99.9051394592												Motif:Gypsy-185_ZM-I	1	2346	91.712275215
Motif:Gypsy-251_AA-I	1	11763	98.3692925238		Motif:Gypsy-31_Adi-I	4	82390	96.2994997429		Motif:CR1-48_BF	4	79602	95.3442968535		Motif:Tx1-25_DR	5	52026	93.7388515522		Motif:ERV3_DR-I	2	30452	96.673015873		Motif:ERV1-3_Crp-I	1	70564	99.9065552881												Motif:Gypsy17-VV_I-int	1	2347	91.7513682565
Motif:Gypsy24-I_Dpse	1	11764	98.3776551263		Motif:Gypsy-30-I_DR	4	82394	96.3041750432		Motif:CR1-1_CGi	4	79606	95.3490879038		Motif:tRNA-Ala-GCA	5	52031	93.7478603989		Motif:ERV3-1_SSc-I	2	30454	96.6793650794		Motif:ERV-10_PM-LTR	1	70565	99.9079711171												Motif:Gypsy-17_ST-I	1	2348	91.7904612979
Motif:Gypsy-23_VV-I	1	11765	98.3860177287		Motif:Gypsy-2_Pru-I	4	82398	96.3088503436		Motif:CR1-1_AG	4	79610	95.3538789541		Motif:TE2-4_CR	5	52036	93.7568692456		Motif:ERV-2B_Crp-LTR	2	30456	96.6857142857		Motif:ERV10_MD_I-int	1	70566	99.9093869461												Motif:Gypsy17-PTR_I-int	1	2349	91.8295543393
Motif:Gypsy-23_ST-I	1	11766	98.3943803312		Motif:Gypsy-2_PBa-I	4	82402	96.313525644		Motif:CR1-124_AAe	4	79614	95.3586700044		Motif:TART-A	5	52041	93.7658780923		Motif:ERV1-1_LA-I	2	30458	96.6920634921		Motif:ENSPM_OS	1	70567	99.910802775												Motif:Gypsy-17-I_XT	1	2350	91.8686473808
Motif:Gypsy-23_PMar-I	1	11767	98.4027429336		Motif:Gypsy-2_MVPL-I	4	82406	96.3182009444		Motif:Copia-9_BRa-I	4	79618	95.3634610547		Motif:Sat-1_TSy	5	52046	93.774886939		Motif:ENSUPMET	2	30460	96.6984126984		Motif:EnSpm-N1_TD	1	70568	99.912218604												Motif:Gypsy17-I_CR	1	2351	91.9077404222
Motif:Gypsy-22_SB-I	1	11768	98.411105536		Motif:Gypsy-24_DBp-I	4	82410	96.3228762448		Motif:Copia-5_DAn-I	4	79622	95.3682521051		Motif:SAT-1_SK	5	52051	93.7838957857		Motif:EnSpm-N11_DR	2	30462	96.7047619048		Motif:EnSpm-7_HM	1	70569	99.913634433												Motif:Gypsy-175_DR-I	1	2352	91.9468334636
Motif:Gypsy-228_AA-I	1	11769	98.4194681385		Motif:Gypsy-23_CSa-I	4	82414	96.3275515452		Motif:Copia-41_FV-I	4	79626	95.3730431554		Motif:Polinton-3_SP	5	52056	93.7929046323		Motif:EnSpm-4_Mad	2	30464	96.7111111111		Motif:EnSpm-6N1_DR	1	70570	99.9150502619												Motif:Gypsy16-I_VC	1	2353	91.9859265051
Motif:Gypsy-21_BD-I	1	11770	98.4278307409		Motif:Gypsy-22_ST-I	4	82418	96.3322268456		Motif:Copia2-I_CR	4	79630	95.3778342057		Motif:Pigibakku	5	52061	93.801913479		Motif:EnSpm-3_NVe	2	30466	96.7174603175		Motif:EnSpm-41N2_SBi	1	70571	99.9164660909												Motif:Gypsy16-I_AG	1	2354	92.0250195465
Motif:Gypsy-219_DR-I	1	11771	98.4361933434		Motif:Gypsy-1-I_LG	4	82422	96.336902146		Motif:Copia-24_PAb-I	4	79634	95.382625256		Motif:MuDR-N1_ZM	5	52066	93.8109223257		Motif:EnSpm-1_NVi	2	30468	96.7238095238		Motif:EnSpm-3_TA	1	70572	99.9178819199												Motif:Gypsy-16_DTa-I	1	2355	92.064112588
Motif:Gypsy-217_AA-I	1	11772	98.4445559458		Motif:Gypsy-190_ZM-I	4	82426	96.3415774464		Motif:Copia-15_FV-I	4	79638	95.3874163063		Motif:MuDR-3_MLP	5	52071	93.8199311724		Motif:EnSpm-18_HMa	2	30470	96.7301587302		Motif:EnSpm2_TM	1	70573	99.9192977488												Motif:Gypsy-15_DEl-I	1	2356	92.1032056294
Motif:Gypsy-211_AA-I	1	11773	98.4529185483		Motif:Gypsy-18_Crp-I	4	82430	96.3462527467		Motif:Copia-101_GM-I	4	79642	95.3922073567		Motif:MuDR-2_GM	5	52076	93.8289400191		Motif:EnSpm-13_ZM	2	30472	96.7365079365		Motif:EnSpm-2_TM	1	70574	99.9207135778												Motif:Gypsy-14_PGr-I	1	2357	92.1422986708
Motif:Gypsy-1_PGr-I	1	11774	98.4612811507		Motif:Gypsy-18_CPB-I	4	82434	96.3509280471		Motif:Chapaev-1_AA	4	79646	95.396998407		Motif:MuDr-1_HV	5	52081	93.8379488658		Motif:DNA-X-16_DR	2	30474	96.7428571429		Motif:EnSpm-2_GM	1	70575	99.9221294068												Motif:Gypsy-143_ZM-I	1	2358	92.1813917123
Motif:Gypsy-1_CMe-LTR	1	11775	98.4696437531		Motif:Gypsy-15_PAb-I	4	82438	96.3556033475		Motif:Caulimovirus-4_STu	4	79650	95.4017894573		Motif:Mariner-N6_PBa	5	52086	93.8469577125		Motif:DNA9TA1_DR	2	30476	96.7492063492		Motif:EnSpm-26_SBi	1	70576	99.9235452357												Motif:Gypsy-13_TA-I	1	2359	92.2204847537
Motif:Gypsy-1_AC-I	1	11776	98.4780063556		Motif:Gypsy-15_CQ-I	4	82442	96.3602786479		Motif:CATCH2LTR_DR	4	79654	95.4065805076		Motif:Mariner-N2_PBa	5	52091	93.8559665592		Motif:DNA9-3C_Mad	2	30478	96.7555555556		Motif:EnSpm-15_SBi	1	70577	99.9249610647												Motif:Gypsy-13_RO-I	1	2360	92.2595777952
Motif:Gypsy-19_SB-I	1	11777	98.486368958		Motif:Gypsy134-LTR_DR	4	82446	96.3649539483		Motif:BEL-8_XT-I	4	79658	95.4113715579		Motif:Mariner-52_HSal	5	52096	93.8649754058		Motif:DNA8-5_HSal	2	30480	96.7619047619		Motif:EnSpm-10_HM	1	70578	99.9263768937												Motif:Gypsy-13_PR-I	1	2361	92.2986708366
Motif:Gypsy-19_PIT-I	1	11778	98.4947315605		Motif:Gypsy-12_PBa-I	4	82450	96.3696292487		Motif:ATLINE1_6	4	79662	95.4161626082		Motif:LTR11_Ami	5	52101	93.8739842525		Motif:DNA6-1_SP	2	30482	96.7682539683		Motif:DNA9-4_CGi	1	70579	99.9277927226												Motif:Gypsy-13_MLP-I	1	2362	92.337763878
Motif:Gypsy-187_DR-I	1	11779	98.5030941629		Motif:Gypsy-125_SBi-LTR	4	82454	96.3743045491		Motif:5SrRNA-1_BG	4	79666	95.4209536586		Motif:LatiHarb1-1	5	52106	93.8829930992		Motif:DNA5-4_CGi	2	30484	96.7746031746		Motif:DNA-8-23_DR	1	70580	99.9292085516												Motif:Gypsy-13_FV-I	1	2363	92.3768569195
Motif:Gypsy-17_SI-I	1	11780	98.5114567653		Motif:Gypsy122-LTR_DR	4	82458	96.3789798495		Motif:Zisupton-3_DR	3	79669	95.4245469463		Motif:L2_AC_6	5	52111	93.8920019459		Motif:DNA-5-2_DR	2	30486	96.780952381		Motif:DNA8-21_DR	1	70581	99.9306243806												Motif:Gypsy-131_DR-I	1	2364	92.4159499609
Motif:Gypsy-17_BG-I	1	11781	98.5198193678		Motif:Ginger2-1_LS	4	82462	96.3836551498		Motif:ZhAT6_ZM	3	79672	95.428140234		Motif:L2-30_ACar	5	52116	93.9010107926		Motif:DNA3-N1_SIn	2	30488	96.7873015873		Motif:DNA3-3_MLP	1	70582	99.9320402095												Motif:Gypsy-129_SBi-I	1	2365	92.4550430023
Motif:Gypsy-161_ZM-LTR	1	11782	98.5281819702		Motif:Galileo_DB	4	82466	96.3883304502		Motif:Zator-1N2_PM	3	79675	95.4317335218		Motif:L1-8_GM	5	52121	93.9100196393		Motif:DNA3-1_CR	2	30490	96.7936507937		Motif:DNA3-11_CGi	1	70583	99.9334560385												Motif:Gypsy-126_SBi-LTR	1	2366	92.4941360438
Motif:Gypsy-15_XT-I	1	11783	98.5365445727		Motif:EnSpm-N1_NVi	4	82470	96.3930057506		Motif:Zator-1N1_LCh	3	79678	95.4353268095		Motif:L1-79_DR	5	52126	93.919028486		Motif:DNA3-1_CGi	2	30492	96.8		Motif:DNA-2-32_DR	1	70584	99.9348718675												Motif:Gypsy-126_SBi-I	1	2367	92.5332290852
Motif:Gypsy-15_SMo-I	1	11784	98.5449071751		Motif:EnSpm-5_VV	4	82474	96.397681051		Motif:Vingi-10_CPB	3	79681	95.4389200973		Motif:L1-71_ACar	5	52131	93.9280373327		Motif:DNA3-14_CGi	2	30494	96.8063492063		Motif:DNA-2-24_DR	1	70585	99.9362876964												Motif:Gypsy-121_SBi-I	1	2368	92.5723221267
Motif:Gypsy-15_DAn-I	1	11785	98.5532697776		Motif:DNAX-25_DR	4	82478	96.4023563514		Motif:Tx1-6_CQ	3	79684	95.442513385		Motif:L1-67_DR	5	52136	93.9370461793		Motif:DNA3-11_CGi	2	30496	96.8126984127		Motif:DNA-1-7_DR	1	70586	99.9377035254												Motif:Gypsy-120_ZM-I	1	2369	92.6114151681
Motif:Gypsy-150-LTRb_DR	1	11786	98.56163238		Motif:DNA-TTAA-5_NV	4	82482	96.4070316518		Motif:Tx1-2_AAe	3	79687	95.4461066727		Motif:L1-3_NV	5	52141	93.946055026		Motif:DNA2-10_DR	2	30498	96.819047619		Motif:DNA-1-2_DR	1	70587	99.9391193544												Motif:Gypsy-11_DBi-I	1	2370	92.6505082095
Motif:Gypsy14-LTR_Dpse	1	11787	98.5699949824		Motif:DNA9-13_Mad	4	82486	96.4117069522		Motif:Tx1-10_CGi	3	79690	95.4496999605		Motif:L1-36_ACar	5	52146	93.9550638727		Motif:Daphne-78_HMa	2	30500	96.8253968254		Motif:DIP0	1	70588	99.9405351833												Motif:Gypsy-11_CGi-I	1	2371	92.689601251
Motif:Gypsy-13_PR-I	1	11788	98.5783575849		Motif:DNA2-28_CGi	4	82490	96.4163822526		Motif:TUB2	3	79693	95.4532932482		Motif:L1-30_DR	5	52151	93.9640727194		Motif:Dada-1_BF	2	30502	96.8317460317		Motif:Dada-U6_GA	1	70589	99.9419510123												Motif:Gypsy-117_SB-I	1	2372	92.7286942924
Motif:Gypsy-13_Mad-I	1	11789	98.5867201873		Motif:DNA-2-1_NVi	4	82494	96.4210575529		Motif:tRNA-Leu-CTA_	3	79696	95.456886536		Motif:L1-2_Ttr	5	52156	93.9730815661		Motif:CR1-87_HM	2	30504	96.8380952381		Motif:Dada-tIB_PMar	1	70590	99.9433668413												Motif:Gypsy117-I_DR	1	2373	92.7677873339
Motif:Gypsy13-LTR_AG	1	11790	98.5950827898		Motif:DNA-2-15_DR	4	82498	96.4257328533		Motif:tRNACysGCA_CB	3	79699	95.4604798237		Motif:L1-1_Mad	5	52161	93.9820904128		Motif:CR1-82_HM	2	30506	96.8444444444		Motif:Dada-1_ON	1	70591	99.9447826703												Motif:Gypsy-117_GM-I	1	2374	92.8068803753
Motif:Gypsy-137_SBi-LTR	1	11791	98.6034453922		Motif:DNA-1_CQ	4	82502	96.4304081537		Motif:tRNA-Ala-GCY	3	79702	95.4640731114		Motif:L1-1_FR	5	52166	93.9910992595		Motif:CR1-49_HM	2	30508	96.8507936508		Motif:Dada-1_GM	1	70592	99.9461984992												Motif:Gypsy-10_Mad-I	1	2375	92.8459734167
Motif:Gypsy-137_GM-I	1	11792	98.6118079946		Motif:DIRS-5_DR	4	82506	96.4350834541		Motif:tRNAAlaAGC_CB	3	79705	95.4676663992		Motif:Kolobok-N9_DR	5	52171	94.0001081062		Motif:CR1-25_HM	2	30510	96.8571428571		Motif:CVE	1	70593	99.9476143282												Motif:Gypsy-10_ES-I	1	2376	92.8850664582
Motif:Gypsy134-LTR_DR	1	11793	98.6201705971		Motif:DIRS-35_XT	4	82510	96.4397587545		Motif:TORTL1	3	79708	95.4712596869		Motif:Kolobok-3_Lch	5	52176	94.0091169528		Motif:Copia-9_PAb-I	2	30512	96.8634920635		Motif:CryptonS-9_PS	1	70594	99.9490301572												Motif:Gypsy-107_GM-I	1	2377	92.9241594996
Motif:Gypsy-133_ZM-I	1	11794	98.6285331995		Motif:DEL_LH_I-int	4	82514	96.4444340549		Motif:TDH5_LTR	3	79711	95.4748529746		Motif:Jockey-6_DK	5	52181	94.0181257995		Motif:Copia-93_ST-I	2	30514	96.8698412698		Motif:CryptonS-22_PI	1	70595	99.9504459861												Motif:GYPSOR1_I-int	1	2378	92.963252541
Motif:Gypsy-12_TA-I	1	11795	98.636895802		Motif:CryptonS-5_PS	4	82518	96.4491093553		Motif:TAR1_TA	3	79714	95.4784462624		Motif:Jockey-5_DVi	5	52186	94.0271346462		Motif:Copia-92_PTr-I	2	30516	96.8761904762		Motif:CryptonS-1_PR	1	70596	99.9518618151												Motif:GYPSM1_I-int	1	2379	93.0023455825
Motif:Gypsy-11_MLP-I	1	11796	98.6452584044		Motif:CryptonS-1_PR	4	82522	96.4537846557		Motif:TABOR_DA-I	3	79717	95.4820395501		Motif:INV2j_DB	5	52191	94.0361434929		Motif:Copia-89_VV-I	2	30518	96.8825396825		Motif:CR1-73_AAe	1	70597	99.9532776441												Motif:GmCOPIA11_I-int	1	2380	93.0414386239
Motif:Gypsy-11_CFl-LTR	1	11797	98.6536210069		Motif:CPSC4B_I-int	4	82526	96.4584599561		Motif:STOWAWAY50_OS	3	79720	95.4856328379		Motif:I-7B_AAe	5	52196	94.0451523396		Motif:Copia7-PTR_I-int	2	30520	96.8888888889		Motif:Copia-83_SB-I	1	70598	99.954693473												Motif:Ginger2-1_TS	1	2381	93.0805316654
Motif:Gypsy-10_RO-I	1	11798	98.6619836093		Motif:Copia-91_ST-I	4	82530	96.4631352564		Motif:SSU-rRNA_Ath	3	79723	95.4892261256		Motif:HERV17-int	5	52201	94.0541611863		Motif:Copia-7_PAb-I	2	30522	96.8952380952		Motif:Copia-7_PAb-I	1	70599	99.956109302												Motif:Ginger2-1_LS	1	2382	93.1196247068
Motif:Gypsy-10_PR-I	1	11799	98.6703462117		Motif:Copia-66_Mad-I	4	82534	96.4678105568		Motif:Sola3-1_EmiHux	3	79726	95.4928194133		Motif:Helitron-N21_CGi	5	52206	94.063170033		Motif:Copia-77_BG-I	2	30524	96.9015873016		Motif:Copia-7_BD-I	1	70600	99.957525131												Motif:Ginger1-2_DR	1	2383	93.1587177482
Motif:GRANDE1_ZD-int	1	11800	98.6787088142		Motif:Copia-56_SB-I	4	82538	96.4724858572		Motif:Sola1-N7_AAe	3	79729	95.4964127011		Motif:hAT-N36B_DR	5	52211	94.0721788797		Motif:Copia-74_PT-I	2	30526	96.9079365079		Motif:Copia-71_MLP-I	1	70601	99.9589409599												Motif:ERVB1_2-I_RN	1	2384	93.1978107897
Motif:Ginger2-2_NV	1	11801	98.6870714166		Motif:Copia-4_TC-I	4	82542	96.4771611576		Motif:SHALINE2_MT	3	79732	95.5000059888		Motif:hAT-N16_Crp	5	52216	94.0811877263		Motif:Copia-6_ST-I	2	30528	96.9142857143		Motif:Copia-67_SB-LTR	1	70602	99.9603567889												Motif:ERV4_DR-I	1	2385	93.2369038311
Motif:Ginger2-1_LS	1	11802	98.6954340191		Motif:Copia-27_FV-I	4	82546	96.481836458		Motif:SFV1-15_AMi-I	3	79735	95.5035992766		Motif:hATm-50_HM	5	52221	94.090196573		Motif:Copia-6_SMo-I	2	30530	96.9206349206		Motif:Copia-60_SB-I	1	70603	99.9617726179												Motif:ERV-2_Crp-LTR	1	2386	93.2759968726
Motif:Ginger1-1_DR	1	11803	98.7037966215		Motif:Copia-25_SB-I	4	82550	96.4865117584		Motif:Sagan-4_TMe	3	79738	95.5071925643		Motif:hATm-33_HM	5	52226	94.0992054197		Motif:Copia-6_PD-I	2	30532	96.926984127		Motif:Copia-5_ES-I	1	70604	99.9631884468												Motif:ERV2-1_SH-I	1	2387	93.315089914
Motif:GGLTR10D-int	1	11804	98.712159224		Motif:Copia-20_PIT-I	4	82554	96.4911870588		Motif:RTEX-2_ACar	3	79741	95.510785852		Motif:hAT-5_GM	5	52231	94.1082142664		Motif:Copia-6_DWil-I	2	30534	96.9333333333		Motif:Copia-56_SB-I	1	70605	99.9646042758												Motif:ERV2-1-LTR_BT	1	2388	93.3541829554
Motif:GENIE_GT	1	11805	98.7205218264		Motif:Copia-11_SMo-I	4	82558	96.4958623592		Motif:RTEX-1_CR	3	79744	95.5143791398		Motif:hAT-53_HM	5	52236	94.1172231131		Motif:Copia-68_VV-I	2	30536	96.9396825397		Motif:Copia-55_SB-I	1	70606	99.9660201048												Motif:ERV2-1_ET-I	1	2389	93.3932759969
Motif:G4_DM	1	11806	98.7288844288		Motif:Copia11-PTR_I-int	4	82562	96.5005376595		Motif:RTEX-17_SK	3	79747	95.5179724275		Motif:hAT-4_PTr	5	52241	94.1262319598		Motif:Copia-67_ST-I	2	30538	96.946031746		Motif:Copia-52_ZM-I	1	70607	99.9674359337												Motif:ERV1-N7-I_DR	1	2390	93.4323690383
Motif:ERV-7_PM-LTR	1	11807	98.7372470313		Motif:Chapaev3-1_HR	4	82566	96.5052129599		Motif:RTE2_ZM	3	79750	95.5215657152		Motif:hAT-43_Lch	5	52246	94.1352408065		Motif:Copia-63_BRa-I	2	30540	96.9523809524		Motif:Copia-4_SMo-I	1	70608	99.9688517627												Motif:ERV1-7_DR-I	1	2391	93.4714620797
Motif:ERV6B-MD_I-int	1	11808	98.7456096337		Motif:CeRep54	4	82570	96.5098882603		Motif:RNSAT1c	3	79753	95.525159003		Motif:hAT-29_DR	5	52251	94.1442496532		Motif:Copia-61_Mad-I	2	30542	96.9587301587		Motif:Copia-35_Mad-I	1	70609	99.9702675917												Motif:ERV1-4_Gav-I	1	2392	93.5105551212
Motif:ERV47_MD_I-int	1	11809	98.7539722362		Motif:CER7-I_CE	4	82574	96.5145635607		Motif:RNLTR2d	3	79756	95.5287522907		Motif:hAT-18_LCh	5	52256	94.1532584998		Motif:Copia-5_DPu-I	2	30544	96.9650793651		Motif:Copia-20_SB-I	1	70610	99.9716834206												Motif:ERV1-1_SSc-I	1	2393	93.5496481626
Motif:ERV-3_LCh-LTR	1	11810	98.7623348386		Motif:BEL-9_SI-I	4	82578	96.5192388611		Motif:RLTR32_Rn	3	79759	95.5323455785		Motif:Harbinger-N15_DR	5	52261	94.1622673465		Motif:Copia-54_PTr-I	2	30546	96.9714285714		Motif:Copia-1_ST-LTR	1	70611	99.9730992496												Motif:Eri-2B2_EE	1	2394	93.5887412041
Motif:ERV3-1_DNo-I	1	11811	98.770697441		Motif:BEL-40_DRe-LTR	4	82582	96.5239141615		Motif:RLTR17B_Mm	3	79762	95.5359388662		Motif:Harbinger2-1_NV	5	52266	94.1712761932		Motif:Copia53-PTR_I-int	2	30548	96.9777777778		Motif:Copia-1_SPDB-I	1	70612	99.9745150786												Motif:EnSpm-N2_TA	1	2395	93.6278342455
Motif:ERV2-2_SA-I	1	11812	98.7790600435		Motif:BEL-30_CQ-LTR	4	82586	96.5285894619		Motif:R2-1_TG	3	79765	95.5395321539		Motif:Harbinger1_DR	5	52271	94.1802850399		Motif:Copia49-PTR_I-int	2	30550	96.9841269841		Motif:Copia1_HV-int	1	70613	99.9759309075												Motif:EnSpm-7_FV	1	2396	93.6669272869
Motif:ERV2-1_PVa-I	1	11813	98.7874226459		Motif:BEL-1_DWil-I	4	82590	96.5332647623		Motif:POPGY1_LTR	3	79768	95.5431254417		Motif:Gypsy-I_MT	5	52276	94.1892938866		Motif:Copia-48_Mad-I	2	30552	96.9904761905		Motif:Copia-18_MLP-I	1	70614	99.9773467365												Motif:EnSpm-7_DR	1	2397	93.7060203284
Motif:ERV2-1-I_Opr	1	11814	98.7957852484		Motif:ATCopia59_I-int	4	82594	96.5379400626		Motif:POPCOP2_I-int	3	79771	95.5467187294		Motif:Gypsy-9_PBa-I	5	52281	94.1983027333		Motif:Copia-47_VV-I	2	30554	96.9968253968		Motif:Copia-10_SB-I	1	70615	99.9787625655												Motif:ENSPM-6_DR	1	2398	93.7451133698
Motif:ERV1-N9-LTR_DR	1	11815	98.8041478508		Motif:Zisupton-5_DR	3	82597	96.5414465379		Motif:Polinton-3_NV	3	79774	95.5503120172		Motif:Gypsy-92_ZM-I	5	52286	94.20731158		Motif:Copia-45_VV-I	2	30556	97.0031746032		Motif:Copia-10_ES-I	1	70616	99.9801783945												Motif:EnSpm-43_SBi	1	2399	93.7842064113
Motif:ERV-1_LCh-I	1	11816	98.8125104533		Motif:Vandal22	3	82600	96.5449530132		Motif:Polinton-2_DBi	3	79777	95.5539053049		Motif:Gypsy8-I_Dpse	5	52291	94.2163204267		Motif:Copia-45_FV-I	2	30558	97.0095238095		Motif:Copia-10_ADe-I	1	70617	99.9815942234												Motif:EnSpm-41_SBi	1	2400	93.8232994527
Motif:ERV1-4-EC_I-int	1	11817	98.8208730557		Motif:Tx1-1_CGi	3	82603	96.5484594885		Motif:piggyBac-N5_DR	3	79780	95.5574985926		Motif:Gypsy-5_RO-I	5	52296	94.2253292733		Motif:Copia-44_VV-I	2	30560	97.0158730159		Motif:Chapaev-1_AA	1	70618	99.9830100524												Motif:EnSpm-3_HM	1	2401	93.8623924941
Motif:ERV1-3_FCa-I	1	11818	98.8292356581		Motif:tRNA-Val-GTA	3	82606	96.5519659638		Motif:P-1_PBa	3	79783	95.5610918804		Motif:Gypsy-26-I_NVi	5	52301	94.23433812		Motif:Copia-42_MLP-I	2	30562	97.0222222222		Motif:BS2	1	70619	99.9844258814												Motif:EnSpm-3_DR	1	2402	93.9014855356
Motif:ERV1-2_PVa-I	1	11819	98.8375982606		Motif:tRNA-Gly-GGA	3	82609	96.5554724391		Motif:P-1_AllMac	3	79786	95.5646851681		Motif:Gypsy-249_AA-LTR	5	52306	94.2433469667		Motif:Copia-40_MLP-I	2	30564	97.0285714286		Motif:BEL-3_DBp-I	1	70620	99.9858417103												Motif:EnSpm-34_SBi	1	2403	93.940578577
Motif:ERV1-2-I_Lch	1	11820	98.845960863		Motif:tRNAAlaAGC_CB	3	82612	96.5589789144		Motif:P-13_HM	3	79789	95.5682784558		Motif:Gypsy-230_DR-LTR	5	52311	94.2523558134		Motif:Copia-3_TMe-I	2	30566	97.0349206349		Motif:BEL-2_DPu-I	1	70621	99.9872575393												Motif:EnSpm-32_SBi	1	2404	93.9796716185
Motif:EnSpm-N17_DR	1	11821	98.8543234655		Motif:TransibN3_DP	3	82615	96.5624853897		Motif:OSTE26	3	79792	95.5718717436		Motif:Gypsy-20_PGr-I	5	52316	94.2613646601		Motif:Copia-3_SL-I	2	30568	97.0412698413		Motif:BEL1-I_SM	1	70622	99.9886733683												Motif:EnSpm-30_SBi	1	2405	94.0187646599
Motif:EnSpm-N11_DR	1	11822	98.8626860679		Motif:TOS17	3	82618	96.565991865		Motif:OSLINE1-2	3	79795	95.5754650313		Motif:Gypsy20-LTR_SP	5	52321	94.2703735068		Motif:Copia-3_CPu-I	2	30570	97.0476190476		Motif:BEL-13_LH-I	1	70623	99.9900891972												Motif:EnSpm-1_STu	1	2406	94.0578577013
Motif:EnSpm-9_STu	1	11823	98.8710486703		Motif:TE-5_CGi	3	82621	96.5694983403		Motif:Ogre-LE1_LTR	3	79798	95.5790583191		Motif:Gypsy-1_CMe-LTR	5	52326	94.2793823535		Motif:Copia-36_PX-I	2	30572	97.053968254		Motif:BEL-12_CQ-LTR	1	70624	99.9915050262												Motif:EnSpm-1_NVi	1	2407	94.0969507428
Motif:EnSpm-7_STu	1	11824	98.8794112728		Motif:SUKKULA2_HV-LTR	3	82624	96.5730048156		Motif:Nimb-14_DR	3	79801	95.5826516068		Motif:Gypsy-18A_SB-I	5	52331	94.2883912002		Motif:Copia35-PTR_I-int	2	30574	97.0603174603		Motif:BEL-10_DBp-I	1	70625	99.9929208552												Motif:EnSpm-1_ADi	1	2408	94.1360437842
Motif:EnSpm-7_HM	1	11825	98.8877738752		Motif:SSU-rRNA_Ddi	3	82627	96.5765112909		Motif:MuDR-9_SBi	3	79804	95.5862448945		Motif:Gypsy-133_GM-I	5	52336	94.2974000468		Motif:Copia-35_CQ-I	2	30576	97.0666666667		Motif:ATMU8	1	70626	99.9943366841												Motif:EnSpm-16_DR	1	2409	94.1751368256
Motif:EnSpm-5_VV	1	11826	98.8961364777		Motif:Sola3-1_PS	3	82630	96.5800177661		Motif:MuDR-1_DF	3	79807	95.5898381823		Motif:Gypsy-131_DR-I	5	52341	94.3064088935		Motif:Copia2-I_Dmoj	2	30578	97.073015873		Motif:ATLINE1_10A	1	70627	99.9957525131												Motif:EnSpm11_SB	1	2410	94.2142298671
Motif:EnSpm-4_PGr	1	11827	98.9044990801		Motif:Sola3-1_DPu	3	82633	96.5835242414		Motif:MuDR-14_GM	3	79810	95.59343147		Motif:GGERVL-C-int	5	52346	94.3154177402		Motif:Copia-2_Cfl-I	2	30580	97.0793650794		Motif:ATCopia37_I-int	1	70628	99.9971683421												Motif:DongAG	1	2411	94.2533229085
Motif:EnSpm-4_HV	1	11828	98.9128616826		Motif:SAT-9_DR	3	82636	96.5870307167		Motif:MonoRep114	3	79813	95.5970247578		Motif:ERV-3_LCh-LTR	5	52351	94.3244265869		Motif:Copia-2_BDJ-I	2	30582	97.0857142857		Motif:ATCopia28_I-int	1	70629	99.998584171												Motif:DNA-X-5_DR	1	2412	94.29241595
Motif:EnSpm-4_FV	1	11829	98.921224285		Motif:SAT-1_PGr	3	82639	96.590537192		Motif:MINISAT2_CB	3	79816	95.6006180455		Motif:EnSpm-36_SBi	5	52356	94.3334354336		Motif:Copia29-PTR_I-int	2	30584	97.0920634921		Motif:ACCORD_LTR	1	70630	100												Motif:DNA-X-12_DR	1	2413	94.3315089914
Motif:EnSpm3_SB	1	11830	98.9295868874		Motif:SAT-19_DR	3	82642	96.5940436673		Motif:Mariner-N8_PBa	3	79819	95.6042113332		Motif:DNA3-11_Mad	5	52361	94.3424442803		Motif:Copia-27_PAb-I	2	30586	97.0984126984																	Motif:DNA9-4_FV	1	2414	94.3706020328
Motif:ENSPM3_OS	1	11831	98.9379494899		Motif:Sagan-7_MLP	3	82645	96.5975501426		Motif:Mariner-79_HSal	3	79822	95.607804621		Motif:DNA-2-20_DR	5	52366	94.351453127		Motif:Copia-27_GM-I	2	30588	97.1047619048																	Motif:DNA9-16_Mad	1	2415	94.4096950743
Motif:EnSpm-2_TA	1	11832	98.9463120923		Motif:RTEX-2_DR	3	82648	96.6010566179		Motif:Mariner3-3_HSal	3	79825	95.6113979087		Motif:DNA-1_CQ	5	52371	94.3604619737		Motif:Copia-26_Mad-I	2	30590	97.1111111111																	Motif:DNA8-25_DR	1	2416	94.4487881157
Motif:ENSPM1_VV	1	11833	98.9546746948		Motif:RP5S	3	82651	96.6045630932		Motif:Mariner-15_SIn	3	79828	95.6149911964		Motif:DIRS-9_Lch	5	52376	94.3694708203		Motif:Copia-22_PAb-I	2	30592	97.1174603175																	Motif:DNA-8-24_DR	1	2417	94.4878811572
Motif:EnSpm1_TM	1	11834	98.9630372972		Motif:REP-2_PSt	3	82654	96.6080695685		Motif:Mariner-14_LCh	3	79831	95.6185844842		Motif:Copia-89_VV-I	5	52381	94.378479667		Motif:Copia-22_Mad-I	2	30594	97.1238095238																	Motif:DNA-8-19_DR	1	2418	94.5269741986
Motif:EnSpm-1_BF	1	11835	98.9713998996		Motif:REP-2_DF	3	82657	96.6115760438		Motif:Mariner-10_LCh	3	79834	95.6221777719		Motif:Copia-7_TA-I	5	52386	94.3874885137		Motif:Copia-18_FV-I	2	30596	97.1301587302																	Motif:DNA8-12_CGi	1	2419	94.56606724
Motif:EnSpm-14_OS	1	11836	98.9797625021		Motif:R4-1_ED	3	82660	96.6150825191		Motif:MacERV4_int-int	3	79837	95.6257710597		Motif:Copia-44_VV-LTR	5	52391	94.3964973604		Motif:Copia-16_FV-I	2	30598	97.1365079365																	Motif:DNA-7_NV	1	2420	94.6051602815
Motif:EnSpm-10_HM	1	11837	98.9881251045		Motif:R1-2_AP	3	82663	96.6185889943		Motif:Lx10	3	79840	95.6293643474		Motif:Copia-27_FV-I	5	52396	94.4055062071		Motif:Copia-15_SB-I	2	30600	97.1428571429																	Motif:DNA-6-N2_DR	1	2421	94.6442533229
Motif:DNAX-25_DR	1	11838	98.996487707		Motif:Polinton-6_NVi	3	82666	96.6220954696		Motif:LTR1A2_ML	3	79843	95.6329576351		Motif:BEL-3-LTR_NVi	5	52401	94.4145150538		Motif:Copia-15_PAb-I	2	30602	97.1492063492																	Motif:DNA6-6_DR	1	2422	94.6833463643
Motif:DNA9-4_FV	1	11839	99.0048503094		Motif:piggyBac-N2_XT	3	82669	96.6256019449		Motif:LSU-rRNA_Hsa	3	79846	95.6365509229		Motif:BEL-21_DWil-I	5	52406	94.4235239005		Motif:Copia14-VV_I-int	2	30604	97.1555555556																	Motif:DNA4-6_CGi	1	2423	94.7224394058
Motif:DNA9-3C_Mad	1	11840	99.0132129119		Motif:piggyBac-N1_XT	3	82672	96.6291084202		Motif:LSU-rRNA_Ath	3	79849	95.6401442106		Motif:ATENSPM5	5	52411	94.4325327472		Motif:Copia-14_DPu-I	2	30606	97.1619047619																	Motif:DNA4-42B_CGi	1	2424	94.7615324472
Motif:DNA9-1_STu	1	11841	99.0215755143		Motif:Penelope1D_XT	3	82675	96.6326148955		Motif:LINE1-15_SBi	3	79852	95.6437374984		Motif:Vandal6	4	52415	94.4397398245		Motif:Copia-13_ST-I	2	30608	97.1682539683																	Motif:DNA-3_FV	1	2425	94.8006254887
Motif:DNA-8-3_HM	1	11842	99.0299381167		Motif:Ogre-VP1_I-int	3	82678	96.6361213708		Motif:L2_AC_16	3	79855	95.6473307861		Motif:Vandal13	4	52419	94.4469469019		Motif:Copia-12_PIT-I	2	30610	97.1746031746																	Motif:DNA3-8_STu	1	2426	94.8397185301
Motif:DNA8-2C_CGi	1	11843	99.0383007192		Motif:Nematis_Cr	3	82681	96.6396278461		Motif:L1-4B_DR	3	79858	95.6509240738		Motif:Tx1-7_DR	4	52423	94.4541539792		Motif:Copia-10_Pru-I	2	30612	97.180952381																	Motif:DNA3-1_CGi	1	2427	94.8788115715
Motif:DNA-8-23_DR	1	11844	99.0466633216		Motif:MUDRAVI1	3	82684	96.6431343214		Motif:L1-44_XT	3	79861	95.6545173616		Motif:Tx1-2_SK	4	52427	94.4613610566		Motif:Copia-107_AA-I	2	30614	97.1873015873																	Motif:DNA3-13B_CGi	1	2428	94.917904613
Motif:DNA8-1_DEl	1	11845	99.0550259241		Motif:MuDR-2_GM	3	82687	96.6466407967		Motif:L1-42_ACar	3	79864	95.6581106493		Motif:Tx1-12_Crp	4	52431	94.4685681339		Motif:COPI1_I-int	2	30616	97.1936507937																	Motif:DNA3-10_CGi	1	2429	94.9569976544
Motif:DNA4-6_CGi	1	11846	99.0633885265		Motif:MSAT-2_CSav	3	82690	96.650147272		Motif:L1-3_PAb	3	79867	95.661703937		Motif:TUB2	4	52435	94.4757752113		Motif:Chapaev-11_HM	2	30618	97.2																	Motif:DNA2-7_CGi	1	2430	94.9960906959
Motif:DNA4-24_CGi	1	11847	99.071751129		Motif:MER4-int	3	82693	96.6536537473		Motif:L1-36_ACar	3	79870	95.6652972248		Motif:TRE3C	4	52439	94.4829822886		Motif:BovB	2	30620	97.2063492063																	Motif:DNA2-6_CGi	1	2431	95.0351837373
Motif:DNA3-8_Mad	1	11848	99.0801137314		Motif:MEGY-I_MT	3	82696	96.6571602225		Motif:L1-34_AAe	3	79873	95.6688905125		Motif:TE-X-7_DR	4	52443	94.490189366		Motif:BEL-57_CQ-I	2	30622	97.2126984127																	Motif:DNA-2-12_DR	1	2432	95.0742767787
Motif:DNA3-14_CGi	1	11849	99.0884763338		Motif:MDG1_I-int	3	82699	96.6606666978		Motif:L1-2_SMo	3	79876	95.6724838003		Motif:TE-8_CGi	4	52447	94.4973964433		Motif:BEL-4_SI-LTR	2	30624	97.219047619																	Motif:DNA-1_FV	1	2433	95.1133698202
Motif:DNA3-13B_CGi	1	11850	99.0968389363		Motif:Mariner-N41_HSal	3	82702	96.6641731731		Motif:L1-2_CPa	3	79879	95.676077088		Motif:TDD-5	4	52451	94.5046035207		Motif:BEL-1_DPer-I	2	30626	97.2253968254																	Motif:DNA-13_CGi	1	2434	95.1524628616
Motif:DNA3-11_CGi	1	11851	99.1052015387		Motif:Mariner-N2_PM	3	82705	96.6676796484		Motif:L1-1B_Opr	3	79882	95.6796703757		Motif:STRIDM	4	52455	94.511810598		Motif:BEL-13_LH-I	2	30628	97.2317460317																	Motif:DNA-1-2_DR	1	2435	95.191555903
Motif:DNA2-7_DR	1	11852	99.1135641412		Motif:LTR47_Ami	3	82708	96.6711861237		Motif:L1-12_LCh	3	79885	95.6832636635		Motif:SSU-rRNA_Hsa	4	52459	94.5190176754		Motif:ATCopia84LTR	2	30630	97.2380952381																	Motif:DIRS-N1_NV	1	2436	95.2306489445
Motif:DNA-2-24_DR	1	11853	99.1219267436		Motif:LTR30_Opr	3	82711	96.674692599		Motif:Kolobok-1_FraCyl	3	79888	95.6868569512		Motif:SIRE3_TC	4	52463	94.5262247527		Motif:ATCopia59_I-int	2	30632	97.2444444444																	Motif:DIRS-N1_DR	1	2437	95.2697419859
Motif:DNA14-5-1_DR	1	11854	99.130289346		Motif:LTR18D_ML	3	82714	96.6781990743		Motif:Kolobok-1_DR	3	79891	95.690450239		Motif:SIRE1_INT-int	4	52467	94.5334318301		Motif:ATCopia38A_I-int	2	30634	97.2507936508																	Motif:DIRS-8_DR	1	2438	95.3088350274
Motif:DM1731_LTR	1	11855	99.1386519485		Motif:LTR-12B1_Crp	3	82717	96.6817055496		Motif:Kiri-5_AAe	3	79894	95.6940435267		Motif:SHALINE14_MT	4	52471	94.5406389074		Motif:ATCopia2I	2	30636	97.2571428571																	Motif:DIRS-8B_DR	1	2439	95.3479280688
Motif:DIRS_Nvi	1	11856	99.1470145509		Motif:L1_Mdo4	3	82720	96.6852120249		Motif:Kiri-21_AAe	3	79897	95.6976368144		Motif:RTEX-27_SK	4	52475	94.5478459848		Motif:ATCopia24I	2	30638	97.2634920635																	Motif:DIRS-2b_Lch	1	2440	95.3870211102
Motif:DIRS-4B_XT	1	11857	99.1553771534		Motif:L1-83_DR	3	82723	96.6887185002		Motif:Jockey-2_DYa	3	79900	95.7012301022		Motif:RTEX-10_BF	4	52479	94.5550530621		Motif:ATCopia11I	2	30640	97.2698412698																	Motif:DIRS-27_ACar	1	2441	95.4261141517
Motif:DIRS-2_MLP-I	1	11858	99.1637397558		Motif:JORDAN	3	82726	96.6922249755		Motif:Jockey-10_DBp	3	79903	95.7048233899		Motif:RTE-8_LCh	4	52483	94.5622601395		Motif:Ambal-2_FCy	2	30642	97.2761904762																	Motif:DIRS-1_PGr-I	1	2442	95.4652071931
Motif:DIRS-12_DR	1	11859	99.1721023583		Motif:Jockey-3_DPer	3	82729	96.6957314507		Motif:ISL2EU-7_HMa	3	79906	95.7084166776		Motif:RLG_scMaximus_1_8-I	4	52487	94.5694672168		Motif:Academ-2_SK	2	30644	97.2825396825																	Motif:DIRS-1_NGr	1	2443	95.5043002346
Motif:DIRS-11_NV	1	11860	99.1804649607		Motif:ISL2EU-1_LHu	3	82732	96.699237926		Motif:IS3EU-N1_CGi	3	79909	95.7120099654		Motif:RLG_scMaximus_1_3-I	4	52491	94.5766742942		Motif:5S	2	30646	97.2888888889																	Motif:DIASPORA_I-int	1	2444	95.543393276
Motif:DGLT-A1_I-int	1	11861	99.1888275631		Motif:INV2j_DB	3	82735	96.7027444013		Motif:IS3EU-1N1_DR	3	79912	95.7156032531		Motif:Polinton-7_NVi	4	52495	94.5838813715		Motif:ZMCopia2_I-int	1	30647	97.2920634921																	Motif:Daphne-2_NV	1	2445	95.5824863174
Motif:DESMAR1	1	11862	99.1971901656		Motif:hAT-N5_ACar	3	82738	96.7062508766		Motif:I-3_AC	3	79915	95.7191965409		Motif:Polinton2_SM	4	52499	94.5910884489		Motif:Zebedee	1	30648	97.2952380952																	Motif:Daphne-18_HM	1	2446	95.6215793589
Motif:DEL_LH_I-int	1	11863	99.205552768		Motif:hAT-N35C_DR	3	82741	96.7097573519		Motif:Helitron-N3_ZM	3	79918	95.7227898286		Motif:Polinton-2_DR	4	52503	94.5982955262		Motif:ZB47CEN	1	30649	97.2984126984																	Motif:Dada-U6_SS	1	2447	95.6606724003
Motif:Daphne-18_SP	1	11864	99.2139153705		Motif:hAT-N11_ACar	3	82744	96.7132638272		Motif:Helitron-N2d_CGi	3	79921	95.7263831163		Motif:Penelope3_XT	4	52507	94.6055026036		Motif:Zator-N1B_CQ	1	30650	97.3015873016																	Motif:Dada-U6_GA	1	2448	95.6997654418
Motif:Dada-1_GM	1	11865	99.2222779729		Motif:HAT5N_CI	3	82747	96.7167703025		Motif:HELITRON9A_CB	3	79924	95.7299764041		Motif:OSMAR1	4	52511	94.6127096809		Motif:Vingi-4_SPur	1	30651	97.3047619048																	Motif:Dada-tY_PMar	1	2449	95.7388584832
Motif:CryptonF-3_PI	1	11866	99.2306405753		Motif:hAT4_SB	3	82750	96.7202767778		Motif:Helitron-5_ZM	3	79927	95.7335696918		Motif:MuDR-9_SBi	4	52515	94.6199167583		Motif:VHARB4_VV	1	30652	97.3079365079																	Motif:CSINE3A	1	2450	95.7779515246
Motif:CryptonF-2_PS	1	11867	99.2390031778		Motif:hAT-4_PTr	3	82753	96.7237832531		Motif:Helitron-5_NVi	3	79930	95.7371629796		Motif:MuDR-5_STu	4	52519	94.6271238356		Motif:Vandal20	1	30653	97.3111111111																	Motif:CSINE2	1	2451	95.8170445661
Motif:Crypton-7_CGi	1	11868	99.2473657802		Motif:hAT-1_XT	3	82756	96.7272897284		Motif:Helitron-4_SMo	3	79933	95.7407562673		Motif:MuDR-3_STu	4	52523	94.634330913		Motif:Vandal1N1	1	30654	97.3142857143																	Motif:CSINE1	1	2452	95.8561376075
Motif:Crack-9_CQ	1	11869	99.2557283827		Motif:hAT-1N1_XT	3	82759	96.7307962037		Motif:Helitron-2_PTrit	3	79936	95.744349555		Motif:MuDR1_ZM	4	52527	94.6415379903		Motif:U6	1	30655	97.3174603175																	Motif:CryptonV-2_DR	1	2453	95.8952306489
Motif:Crack-3_HM	1	11870	99.2640909851		Motif:Harbinger-1_LCh	3	82762	96.7343026789		Motif:Helitron-2_Mad	3	79939	95.7479428428		Motif:MuDR-11B_GM	4	52531	94.6487450677		Motif:U2	1	30656	97.3206349206																	Motif:CryptonS-N3_PS	1	2454	95.9343236904
Motif:CR1-L2-1_XT	1	11871	99.2724535876		Motif:Harbinger-10_PSt	3	82765	96.7378091542		Motif:Helitron-1_GM	3	79942	95.7515361305		Motif:MtPH-A6-3-Ia	4	52535	94.655952145		Motif:TZF28B	1	30657	97.3238095238																	Motif:Crypton-13N1_CGi	1	2455	95.9734167318
Motif:CR1-98_AAe	1	11872	99.28081619		Motif:HARB-6_ALy	3	82768	96.7413156295		Motif:hATw-1_LV	3	79945	95.7551294182		Motif:Mariner-79_HSal	4	52539	94.6631592224		Motif:Tx1-Sat-1_SK	1	30658	97.326984127																	Motif:Crypton-10_CGi	1	2456	96.0125097733
Motif:CR1-76_HM	1	11873	99.2891787924		Motif:Gypsy-9-I_CR	3	82771	96.7448221048		Motif:hAT-N68_DR	3	79948	95.758722706		Motif:Mariner-14_SIn	4	52543	94.6703662997		Motif:Tx1-4_SK	1	30659	97.3301587302																	Motif:CRM-I_OS	1	2457	96.0516028147
Motif:CR1-64_HM	1	11874	99.2975413949		Motif:Gypsy-85_CQ-I	3	82774	96.7483285801		Motif:hAT-N1_SP	3	79951	95.7623159937		Motif:LTR2C	4	52547	94.6775733771		Motif:Tx1-4_AAe	1	30660	97.3333333333																	Motif:CRE2	1	2458	96.0906958561
Motif:CR1-62_HM	1	11875	99.3059039973		Motif:Gypsy-84_CQ-I	3	82777	96.7518350554		Motif:hAT-9_PM	3	79954	95.7659092815		Motif:LSU-rRNA_Pfa	4	52551	94.6847804544		Motif:Tx1-43_DR	1	30661	97.3365079365																	Motif:Crack-32_BF	1	2459	96.1297888976
Motif:CR1-43_AAe	1	11876	99.3142665998		Motif:Gypsy-7_RO-I	3	82780	96.7553415307		Motif:HAT-7_Mad	3	79957	95.7695025692		Motif:LINE1-4_ZM	4	52555	94.6919875318		Motif:Tx1-34_DR	1	30662	97.3396825397																	Motif:CR1-Z1_Pass	1	2460	96.168881939
Motif:CR1-42_HM	1	11877	99.3226292022		Motif:Gypsy-76_CGi-I	3	82783	96.758848006		Motif:HAT-4_Mad	3	79960	95.7730958569		Motif:L2-2_NVi	4	52559	94.6991946091		Motif:Tx1-2_DR	1	30663	97.3428571429																	Motif:CR1-98_AAe	1	2461	96.2079749805
Motif:CR1-2_DBp	1	11878	99.3309918046		Motif:Gypsy-6_IS-I	3	82786	96.7623544813		Motif:hAT-29_HM	3	79963	95.7766891447		Motif:L1_Ele28	4	52563	94.7064016865		Motif:Tx1-13_DR	1	30664	97.346031746																	Motif:CR1-90_AAe	1	2462	96.2470680219
Motif:CR1-1_DEu	1	11879	99.3393544071		Motif:Gypsy-64_BG-I	3	82789	96.7658609566		Motif:hAT-16_HM	3	79966	95.7802824324		Motif:L1-25_ACar	4	52567	94.7136087638		Motif:tRNAThr_CB	1	30665	97.3492063492																	Motif:CR1-71_HM	1	2463	96.2861610633
Motif:Copia-9_TA-I	1	11880	99.3477170095		Motif:Gypsy-63_CQ-I	3	82792	96.7693674319		Motif:Harbinger-9_PI	3	79969	95.7838757202		Motif:L1-24C_ACar	4	52571	94.7208158412		Motif:tRNA-Ser-TCY	1	30666	97.3523809524																	Motif:CR1-3_HM	1	2464	96.3252541048
Motif:Copia-9_DWil-I	1	11881	99.356079612		Motif:Gypsy-62_BG-LTR	3	82795	96.7728739071		Motif:Harbinger-4B_PSt	3	79972	95.7874690079		Motif:L1-1b_Cis	4	52575	94.7280229185		Motif:tRNA-Leu-TTG	1	30667	97.3555555556																	Motif:CR1-18_BF	1	2465	96.3643471462
Motif:Copia-99_GM-I	1	11882	99.3644422144		Motif:Gypsy-5_PX-I	3	82798	96.7763803824		Motif:Harbinger3_DR	3	79975	95.7910622956		Motif:L1-13_GM	4	52579	94.7352299959		Motif:tRNA-Gly-GGG	1	30668	97.3587301587																	Motif:CR1-16_BF	1	2466	96.4034401876
Motif:Copia-99_AA-LTR	1	11883	99.3728048169		Motif:Gypsy-5_PBa-I	3	82801	96.7798868577		Motif:Harbinger2_DR	3	79978	95.7946555834		Motif:L1-11_GM	4	52583	94.7424370732		Motif:tRNAGlyGGC_CB	1	30669	97.3619047619																	Motif:CR1-13_NV	1	2467	96.4425332291
Motif:Copia-94_Mad-I	1	11884	99.3811674193		Motif:Gypsy-5_DWil-LTR	3	82804	96.783393333		Motif:Harbinger-2_DR	3	79981	95.7982488711		Motif:L1-10_DR	4	52587	94.7496441506		Motif:tRNA-Asn-AAC	1	30670	97.3650793651																	Motif:Coprina_Cc1	1	2468	96.4816262705
Motif:Copia8-VV_I-int	1	11885	99.3895300217		Motif:Gypsy-50_PAb-I	3	82807	96.7868998083		Motif:Harbinger2-2_NV	3	79984	95.8018421588		Motif:Kiri-3_CQ	4	52591	94.7568512279		Motif:tRNA-Arg-AGA	1	30671	97.3682539683																	Motif:Copia-97_SB-I	1	2469	96.520719312
Motif:Copia-84_PT-I	1	11886	99.3978926242		Motif:Gypsy4-VV_I-int	3	82810	96.7904062836		Motif:Harbinger2-2_HM	3	79987	95.8054354466		Motif:Kiri-15_AAe	4	52595	94.7640583053		Motif:tRNA-Ala-GCY	1	30672	97.3714285714																	Motif:Copia8-NVi_I-int	1	2470	96.5598123534
Motif:Copia-7_TC-I	1	11887	99.4062552266		Motif:Gypsy-4_MLP-I	3	82813	96.7939127589		Motif:Harbinger-10_PGr	3	79990	95.8090287343		Motif:KenoDr1	4	52599	94.7712653826		Motif:Transib-5_HM	1	30673	97.3746031746																	Motif:Copia-8_LH-I	1	2471	96.5989053948
Motif:Copia-75_Mad-LTR	1	11888	99.4146178291		Motif:Gypsy4-I_AO	3	82816	96.7974192342		Motif:HAL1-1H_Cpo	3	79993	95.8126220221		Motif:HERVS71-int	4	52603	94.77847246		Motif:Transib-4_HM	1	30674	97.3777777778																	Motif:Copia-7_Mad-I	1	2472	96.6379984363
Motif:Copia-74_MLP-I	1	11889	99.4229804315		Motif:Gypsy49-I_AG	3	82819	96.8009257095		Motif:Gypsy-N1_DPu-I	3	79996	95.8162153098		Motif:HelitronY1B	4	52607	94.7856795373		Motif:TPA5_I-int	1	30675	97.380952381																	Motif:Copia-7_ES-I	1	2473	96.6770914777
Motif:Copia-66_VV-I	1	11890	99.431343034		Motif:Gypsy47-I_AG	3	82822	96.8044321848		Motif:Gypsy-8_SMo-LTR	3	79999	95.8198085975		Motif:Helitron-2_Mad	4	52611	94.7928866147		Motif:TOURIST-XIII	1	30676	97.3841269841																	Motif:Copia-79_MLP-I	1	2474	96.7161845192
Motif:Copia-63_SB-I	1	11891	99.4397056364		Motif:Gypsy-45_PAb-I	3	82825	96.8079386601		Motif:Gypsy-7-I_XT	3	80002	95.8234018853		Motif:hATw-1_LV	4	52615	94.800093692		Motif:TORTL1	1	30677	97.3873015873																	Motif:Copia-79_Mad-LTR	1	2475	96.7552775606
Motif:Copia-53_MLP-I	1	11892	99.4480682388		Motif:Gypsy-45_GA-I	3	82828	96.8114451354		Motif:Gypsy7-I_Dya	3	80005	95.826995173		Motif:HAT-N6_Mad	4	52619	94.8073007694		Motif:TONT2-I_PV	1	30678	97.3904761905																	Motif:Copia-75_Mad-LTR	1	2476	96.794370602
Motif:Copia-52_ZM-I	1	11893	99.4564308413		Motif:Gypsy-45_BD-I	3	82831	96.8149516106		Motif:Gypsy-7_DPu-I	3	80008	95.8305884608		Motif:hAT-6_DR	4	52623	94.8145078467		Motif:TONT1_LE_I-int	1	30679	97.3936507937																	Motif:Copia-64_PX-I	1	2477	96.8334636435
Motif:Copia-4_DMoj-I	1	11894	99.4647934437		Motif:Gypsy-41_DEl-I	3	82834	96.8184580859		Motif:Gypsy-7_DFi-I	3	80011	95.8341817485		Motif:hAT-65_HM	4	52627	94.8217149241		Motif:TIRANT_I-int	1	30680	97.3968253968																	Motif:Copia-57_MLP-I	1	2478	96.8725566849
Motif:Copia-42_PX-I	1	11895	99.4731560462		Motif:GYPSY3-I_MT	3	82837	96.8219645612		Motif:Gypsy-70-I_ZM	3	80014	95.8377750362		Motif:hAT-29_HM	4	52631	94.8289220014		Motif:Tigger5a_Perissod	1	30681	97.4																	Motif:Copia-52_ZM-I	1	2479	96.9116497263
Motif:Copia-3_PPa-I	1	11896	99.4815186486		Motif:Gypsy-35_DWil-I	3	82840	96.8254710365		Motif:Gypsy-62_BG-LTR	3	80017	95.841368324		Motif:hAT-1_PBa	4	52635	94.8361290788		Motif:TguLTRK7m	1	30682	97.4031746032																	Motif:Copia-47_Mad-LTR	1	2480	96.9507427678
Motif:Copia-3_GA-LTR	1	11897	99.489881251		Motif:Gypsy-35_CGi-I	3	82843	96.8289775118		Motif:Gypsy-5-I_XT	3	80020	95.8449616117		Motif:hAT-1N_DP	4	52639	94.8433361561		Motif:TguLTRK7j	1	30683	97.4063492063																	Motif:Copia-46_BRa-I	1	2481	96.9898358092
Motif:Copia-34_DPu-I	1	11898	99.4982438535		Motif:Gypsy-33-LTR_DR	3	82846	96.8324839871		Motif:Gypsy-5_DGri-I	3	80023	95.8485548994		Motif:hAT1_Laf	4	52643	94.8505432335		Motif:TE-X-12_DR	1	30684	97.4095238095																	Motif:Copia-44_ST-I	1	2482	97.0289288507
Motif:Copia-33_GM-I	1	11899	99.5066064559		Motif:Gypsy-32-LTR_DR	3	82849	96.8359904624		Motif:Gypsy-53_SB-LTR	3	80026	95.8521481872		Motif:hAT-17_ZM	4	52647	94.8577503108		Motif:TE-9_CGi	1	30685	97.4126984127																	Motif:Copia-41_ZM-I	1	2483	97.0680218921
Motif:Copia-2_Mad-I	1	11900	99.5149690584		Motif:Gypsy-31_MLP-I	3	82852	96.8394969377		Motif:Gypsy-48_MLP-I	3	80029	95.8557414749		Motif:hAT-17N1_ZM	4	52651	94.8649573882		Motif:TE7-1_FV	1	30686	97.4158730159																	Motif:Copia-41_VV-I	1	2484	97.1071149335
Motif:Copia-29_DPu-I	1	11901	99.5233316608		Motif:Gypsy-2_TC-I	3	82855	96.843003413		Motif:Gypsy47-I_DR	3	80032	95.8593347627		Motif:hAT-16_HM	4	52655	94.8721644655		Motif:TE-3_NV	1	30687	97.419047619																	Motif:Copia-41_PX-I	1	2485	97.146207975
Motif:Copia-29_BD-I	1	11902	99.5316942633		Motif:Gypsy-2_PGr-I	3	82858	96.8465098883		Motif:Gypsy-3_PBa-I	3	80035	95.8629280504		Motif:Harbinger-6_LCh	4	52659	94.8793715429		Motif:TAG3N1	1	30688	97.4222222222																	Motif:Copia41-PTR_I-int	1	2486	97.1853010164
Motif:Copia-27_PIT-I	1	11903	99.5400568657		Motif:Gypsy2-I_Dmoj	3	82861	96.8500163636		Motif:Gypsy-33_ST-I	3	80038	95.8665213381		Motif:Harbinger-2_LCh	4	52663	94.8865786202		Motif:Tad1-63B_BG	1	30689	97.4253968254																	Motif:Copia-40_Mad-I	1	2487	97.2243940579
Motif:Copia-24_BD-LTR	1	11904	99.5484194681		Motif:Gypsy-28_ADe-I	3	82864	96.8535228388		Motif:Gypsy-28_Mad-LTR	3	80041	95.8701146259		Motif:Gypsy-80-I_ZM	4	52667	94.8937856976		Motif:Tad1-58_BG	1	30690	97.4285714286																	Motif:Copia3-I_CR	1	2488	97.2634870993
Motif:Copia-23_Mad-I	1	11905	99.5567820706		Motif:Gypsy-26_DYa-I	3	82867	96.8570293141		Motif:Gypsy-27_DYa-I	3	80044	95.8737079136		Motif:Gypsy61-I_DR	4	52671	94.9009927749		Motif:Tad1-29_BG	1	30691	97.4317460317																	Motif:Copia-38_ST-I	1	2489	97.3025801407
Motif:Copia-23_BRa-I	1	11906	99.565144673		Motif:Gypsy-255_AA-I	3	82870	96.8605357894		Motif:Gypsy-24_GA-I	3	80047	95.8773012014		Motif:Gypsy-55_DEl-I	4	52675	94.9081998523		Motif:Tad1-26C_BG	1	30692	97.4349206349																	Motif:Copia-38_PX-I	1	2490	97.3416731822
Motif:Copia-21_EPa-I	1	11907	99.5735072755		Motif:Gypsy-23_CGi-I	3	82873	96.8640422647		Motif:Gypsy-23_CQ-I	3	80050	95.8808944891		Motif:Gypsy-51_GA-LTR	4	52679	94.9154069296		Motif:Tad1-26_BG	1	30693	97.4380952381																	Motif:Copia-36_Mad-I	1	2491	97.3807662236
Motif:Copia-1_PAb-I	1	11908	99.5818698779		Motif:Gypsy22-ZM_I-int	3	82876	96.86754874		Motif:Gypsy-210_DR-I	3	80053	95.8844877768		Motif:Gypsy-31-I_NVi	4	52683	94.922614007		Motif:TABOR_I-int	1	30694	97.4412698413																	Motif:Copia-36_FV-I	1	2492	97.4198592651
Motif:Copia-1-I_HS	1	11909	99.5902324803		Motif:Gypsy-201_ZM-I	3	82879	96.8710552153		Motif:Gypsy-20_RP-I	3	80056	95.8880810646		Motif:Gypsy-16_DPu-I	4	52687	94.9298210843		Motif:SZ-55_int-int	1	30695	97.4444444444																	Motif:Copia-34_DPu-I	1	2493	97.4589523065
Motif:Copia-1_DVir-I	1	11910	99.5985950828		Motif:Gypsy-1_NG-I	3	82882	96.8745616906		Motif:Gypsy-20_PAb-I	3	80059	95.8916743523		Motif:Gypsy14-LTR_Dpse	4	52691	94.9370281617		Motif:SVA_A	1	30696	97.4476190476																	Motif:Copia-33_GM-I	1	2494	97.4980453479
Motif:Copia18-ZM_I-int	1	11911	99.6069576852		Motif:Gypsy1-I_Dmoj	3	82885	96.8780681659		Motif:Gypsy-1_Trm-LTR	3	80062	95.89526764		Motif:Gypsy-11_PPa-I	4	52695	94.944235239		Motif:Stalker2_I-int	1	30697	97.4507936508																	Motif:Copia-31_Pru-LTR	1	2495	97.5371383894
Motif:Copia18-PTR_I-int	1	11912	99.6153202877		Motif:Gypsy-18_CQ-I	3	82888	96.8815746412		Motif:Gypsy-1-I_DD	3	80065	95.8988609278		Motif:Gypsy118-LTR_DR	4	52699	94.9514423164		Motif:SSU-rRNA_Ddi	1	30698	97.453968254																	Motif:Copia2-I_CR	1	2496	97.5762314308
Motif:Copia-14_DR-LTR	1	11913	99.6236828901		Motif:Gypsy17-VV_I-int	3	82891	96.8850811165		Motif:Gypsy-1_HAS-I	3	80068	95.9024542155		Motif:Galileo_DM	4	52703	94.9586493937		Motif:Sola3-1_Lgigantea	1	30699	97.4571428571																	Motif:Copia-2_Adi-I	1	2497	97.6153244722
Motif:Copia13-NVi_I-int	1	11914	99.6320454926		Motif:Gypsy17-I_Dpse	3	82894	96.8885875918		Motif:Gypsy-1_CMe-LTR	3	80071	95.9060475033		Motif:ERV3-1_DNo-I	4	52707	94.9658564711		Motif:Sola2-4_AAe	1	30700	97.4603174603																	Motif:Copia29-VV_I-int	1	2498	97.6544175137
Motif:Copia-13_FV-I	1	11915	99.640408095		Motif:Gypsy-179_DR-I	3	82897	96.892094067		Motif:Gypsy-199_ZM-I	3	80074	95.909640791		Motif:ERV24_MD_I-int	4	52711	94.9730635484		Motif:Sola2-3_HM	1	30701	97.4634920635																	Motif:Copia-28_Pru-I	1	2499	97.6935105551
Motif:Copia-10_CP-I	1	11916	99.6487706974		Motif:Gypsy15-I_SP	3	82900	96.8956005423		Motif:Gypsy16-I_AG	3	80077	95.9132340787		Motif:EnSpm-N20_DR	4	52715	94.9802706258		Motif:Sola2-2_LHu	1	30702	97.4666666667																	Motif:Copia-26_MLP-I	1	2500	97.7326035966
Motif:Chapaev-4_HM	1	11917	99.6571332999		Motif:Gypsy-14_CCO-I	3	82903	96.8991070176		Motif:Gypsy-16_DPu-I	3	80080	95.9168273665		Motif:EnSpm-N1_TD	4	52719	94.9874777031		Motif:Sola2-2_CGi	1	30703	97.4698412698																	Motif:Copia-26_AA-I	1	2501	97.771696638
Motif:CER15-1-I_CE	1	11918	99.6654959023		Motif:Gypsy-13_CFl-I	3	82906	96.9026134929		Motif:Gypsy-15-I_NV	3	80083	95.9204206542		Motif:EnSpm-8N_VV	4	52723	94.9946847805		Motif:Sola1-7_AP	1	30704	97.473015873																	Motif:Copia-22_PAb-I	1	2502	97.8107896794
Motif:CENSAT_ZM	1	11919	99.6738585048		Motif:Gypsy-12_LH-I	3	82909	96.9061199682		Motif:Gypsy-14_PGr-I	3	80086	95.924013942		Motif:EnSpm-6_STu	4	52727	95.0018918578		Motif:SMAR8	1	30705	97.4761904762																	Motif:Copia-20_PAb-I	1	2503	97.8498827209
Motif:BovB_Me	1	11920	99.6822211072		Motif:Gypsy-12_CCO-I	3	82912	96.9096264435		Motif:Gypsy-14_DAn-I	3	80089	95.9276072297		Motif:EnSpm-38_SBi	4	52731	95.0090989352		Motif:SINE-4_CQ	1	30706	97.4793650794																	Motif:Copia-20_BD-I	1	2504	97.8889757623
Motif:BMSAT1	1	11921	99.6905837097		Motif:Gypsy118-LTR_DR	3	82915	96.9131329188		Motif:Gypsy-13_Mad-I	3	80092	95.9312005174		Motif:EnSpm-1_NV	4	52735	95.0163060125		Motif:SINE2-1_Pca	1	30707	97.4825396825																	Motif:Copia-1_PGr-I	1	2505	97.9280688038
Motif:BMRP1	1	11922	99.6989463121		Motif:Gypsy-10_CCO-I	3	82918	96.9166393941		Motif:Gypsy-132_SBi-I	3	80095	95.9347938052		Motif:EnSpm-17_ZM	4	52739	95.0235130899		Motif:SHAMUDRA2_MT	1	30708	97.4857142857																	Motif:COPIA1-I_OS	1	2506	97.9671618452
Motif:BEL-9_NV-I	1	11923	99.7073089145		Motif:Gypsy-100_AA-I	3	82921	96.9201458694		Motif:Gypsy-119_GM-I	3	80098	95.9383870929		Motif:DNA9-3C_Mad	4	52743	95.0307201672		Motif:SHACOP_I_MT-int	1	30709	97.4888888889																	Motif:Copia-1_ES-I	1	2507	98.0062548866
Motif:BEL-82_AA-I	1	11924	99.715671517		Motif:Gyp_I_MT-int	3	82924	96.9236523447		Motif:Gypsy10-I_Dpse	3	80101	95.9419803806		Motif:DNA-8-4_DR	4	52747	95.0379272446		Motif:SFV1-9_Gav-I	1	30710	97.4920634921																	Motif:Copia-1_DTa-I	1	2508	98.0453479281
Motif:BEL-64_AA-I	1	11925	99.7240341194		Motif:Ginger2-2_NV	3	82927	96.92715882		Motif:GYPSM1_I-int	3	80104	95.9455736684		Motif:DNA6-1_SP	4	52751	95.0451343219		Motif:SFV1-7_Crp-I	1	30711	97.4952380952																	Motif:Copia-18_MLP-I	1	2509	98.0844409695
Motif:BEL-619_AA-I	1	11926	99.7323967219		Motif:GGERVL-C-int	3	82930	96.9306652952		Motif:GYCUME1_LTR	3	80107	95.9491669561		Motif:DNA4-26_CGi	4	52755	95.0523413993		Motif:SFV1-15_Crp-I	1	30712	97.4984126984																	Motif:Copia-18_BD-I	1	2510	98.1235340109
Motif:BEL-609_AA-I	1	11927	99.7407593243		Motif:GGERV28_I-int	3	82933	96.9341717705		Motif:GRANDE1_ZD-int	3	80110	95.9527602439		Motif:DNA2-13_DR	4	52759	95.0595484766		Motif:SFV1-14B_Crp-LTR	1	30713	97.5015873016																	Motif:Copia-17_GM-I	1	2511	98.1626270524
Motif:BEL-5_DMoj-I	1	11928	99.7491219267		Motif:ERV44_MD_I-int	3	82936	96.9376782458		Motif:Ginger2-1_NV	3	80113	95.9563535316		Motif:DIRS-4N2_DR	4	52763	95.066755554		Motif:SC-9_int-int	1	30714	97.5047619048																	Motif:Copia-14_BG-I	1	2512	98.2017200938
Motif:BEL-4_SI-LTR	1	11929	99.7574845292		Motif:ERV22_MD_I-int	3	82939	96.9411847211		Motif:Ginger1-8_HM	3	80116	95.9599468193		Motif:DIRS-4N1_DR	4	52767	95.0739626313		Motif:SAT_PL	1	30715	97.5079365079																	Motif:Copia-118_BRa-I	1	2513	98.2408131353
Motif:BEL-4_SI-I	1	11930	99.7658471316		Motif:ERV2-1-I_Opr	3	82942	96.9446911964		Motif:FW2_DM	3	80119	95.9635401071		Motif:DIRS-2_MLP-I	4	52771	95.0811697087		Motif:Sat-1_TSy	1	30716	97.5111111111																	Motif:Copia-110_BRa-I	1	2514	98.2799061767
Motif:BEL-4_DYa-I	1	11931	99.7742097341		Motif:EnSpm-N1_SIn	3	82945	96.9481976717		Motif:ERV-6_CPB-I	3	80122	95.9671333948		Motif:DIRS-1_NGr	4	52775	95.088376786		Motif:SAT-17_DR	1	30717	97.5142857143																	Motif:Copia-105_Mad-I	1	2515	98.3189992181
Motif:BEL-4_DAn-I	1	11932	99.7825723365		Motif:EnSpm-4_Mad	3	82948	96.951704147		Motif:ERV1-1_SSc-I	3	80125	95.9707266826		Motif:Daphne-2_NV	4	52779	95.0955838634		Motif:SABRINA3_TM-int	1	30718	97.5174603175																	Motif:Copia-105_BRa-LTR	1	2516	98.3580922596
Motif:BEL3_DM-I	1	11933	99.790934939		Motif:EnSpm-4_HV	3	82951	96.9552106223		Motif:EnSpm-N1_T	3	80128	95.9743199703		Motif:CVE	4	52783	95.1027909407		Motif:RT_VM	1	30719	97.5206349206																	Motif:Cheshire_Mars	1	2517	98.397185301
Motif:BEL33-I_DR	1	11934	99.7992975414		Motif:EnSpm-39_SBi	3	82954	96.9587170976		Motif:EnSpm-N1_FV	3	80131	95.977913258		Motif:CryptonV-6_CFl	4	52787	95.1099980181		Motif:RTEX-5_SK	1	30720	97.5238095238																	Motif:Chaplin5_FR	1	2518	98.4362783425
Motif:BEL-30_CQ-LTR	1	11935	99.8076601438		Motif:DNA9-1_CGi	3	82957	96.9622235729		Motif:EnSpm-N1_DR	3	80134	95.9815065458		Motif:CR1-82_HM	4	52791	95.1172050954		Motif:RTEX-3_CGi	1	30721	97.526984127																	Motif:Chaplin5a_FR	1	2519	98.4753713839
Motif:BEL-229_AA-I	1	11936	99.8160227463		Motif:DNA8-5_HSal	3	82960	96.9657300482		Motif:ENSPM_MT	3	80137	95.9850998335		Motif:CR1-18_NV	4	52795	95.1244121728		Motif:RTEX-26_CGi	1	30722	97.5301587302																	Motif:Chapaev-6_HM	1	2520	98.5144644253
Motif:BEL-214_AA-I	1	11937	99.8243853487		Motif:DNA8-10_CGi	3	82963	96.9692365234		Motif:EnSpm8_SB	3	80140	95.9886931212		Motif:Copia3-VV_I-int	4	52799	95.1316192501		Motif:RTEX-23_CGi	1	30723	97.5333333333																	Motif:CER5-I_CE	1	2521	98.5535574668
Motif:BEL-20_AA-I	1	11938	99.8327479512		Motif:DNA6-1_CGi	3	82966	96.9727429987		Motif:EnSpm-8_HM	3	80143	95.992286409		Motif:Copia-30_PX-I	4	52803	95.1388263275		Motif:RTEX-1_CGi	1	30724	97.5365079365																	Motif:CAULIV-1A_SBi	1	2522	98.5926505082
Motif:BEL1-I_Dya	1	11939	99.8411105536		Motif:DNA6-13B_CGi	3	82969	96.976249474		Motif:EnSpm-8_DR	3	80146	95.9958796967		Motif:Copia29-VV_I-int	4	52807	95.1460334048		Motif:RTEX-16_CGi	1	30725	97.5396825397																	Motif:Caulimovirus-4_STu	1	2523	98.6317435496
Motif:BEL-1_DPer-I	1	11940	99.849473156		Motif:DNA2-7_CGi	3	82972	96.9797559493		Motif:ENSPM-6_ZM	3	80149	95.9994729845		Motif:Copia-1_ST-LTR	4	52811	95.1532404822		Motif:RTEX-14_CGi	1	30726	97.5428571429																	Motif:Caulimovirus-2_VVi	1	2524	98.6708365911
Motif:BEL-18_CQ-LTR	1	11941	99.8578357585		Motif:DNA-2-20_DR	3	82975	96.9832624246		Motif:EnSpm-38_SBi	3	80152	96.0030662722		Motif:Copia-1_ES-I	4	52815	95.1604475595		Motif:RTE-9_SP	1	30727	97.546031746																	Motif:CATCH2LTR_DR	1	2525	98.7099296325
Motif:BEL15-LTR_DR	1	11942	99.8661983609		Motif:DMSAT6	3	82978	96.9867688999		Motif:EnSpm-35_SBi	3	80155	96.0066595599		Motif:Copia-14_BG-I	4	52819	95.1676546369		Motif:RTE-6_SP	1	30728	97.5492063492																	Motif:CANDYSTRIPE1_SB	1	2526	98.749022674
Motif:BEL-15_DPu-I	1	11943	99.8745609634		Motif:DIRS-2_MLP-I	3	82981	96.9902753752		Motif:EnSpm-2_HM	3	80158	96.0102528477		Motif:CoeSINE1h	4	52823	95.1748617142		Motif:RTE-3_SP	1	30729	97.5523809524																	Motif:CACTA-Q	1	2527	98.7881157154
Motif:BEL-157_AA-I	1	11944	99.8829235658		Motif:DIRS-1_ACal	3	82984	96.9937818505		Motif:EnSpm-2_FV	3	80161	96.0138461354		Motif:BEL-45_CQ-I	4	52827	95.1820687916		Motif:RTE-3_CPB	1	30730	97.5555555556																	Motif:CACTA-1_CapOwc	1	2528	98.8272087568
Motif:BEL-13_Adi-I	1	11945	99.8912861683		Motif:CUMULE	3	82987	96.9972883258		Motif:EnSpm-1_STu	3	80164	96.0174394232		Motif:ATLINE1_10A	4	52831	95.1892758689		Motif:RTE-2_BM	1	30731	97.5587301587																	Motif:BRENSPM1	1	2529	98.8663017983
Motif:BEL-10_DWil-I	1	11946	99.8996487707		Motif:CSINE2	3	82990	97.0007948011		Motif:EnSpm-16_HM	3	80167	96.0210327109		Motif:5SrRNA-1_BG	4	52835	95.1964829463		Motif:RTE1_Mars	1	30732	97.5619047619																	Motif:BovB_Cg	1	2530	98.9053948397
Motif:Athila7_I-int	1	11947	99.9080113731		Motif:CryptonS-22_PI	3	82993	97.0043012764		Motif:EnSpm-15_HM	3	80170	96.0246259986		Motif:Zator-N2_AAe	3	52838	95.2018882543		Motif:RTAg3	1	30733	97.5650793651																	Motif:BEL-6_DPe-I	1	2531	98.9444878812
Motif:ATCopia67_I-int	1	11948	99.9163739756		Motif:Copia-9_SI-I	3	82996	97.0078077516		Motif:ENS1_Cis	3	80173	96.0282192864		Motif:Tx1-6_SK	3	52841	95.2072935623		Motif:RPS1_CA	1	30734	97.5682539683																	Motif:BEL-6_Ano-I	1	2532	98.9835809226
Motif:ATCopia64_I-int	1	11949	99.924736578		Motif:Copia-99_Mad-I	3	82999	97.0113142269		Motif:DNA-X-17_DR	3	80176	96.0318125741		Motif:Tx1-20_DR	3	52844	95.2126988703		Motif:Ronin3_I-int	1	30735	97.5714285714																	Motif:BEL-61_DRe-I	1	2533	99.022673964
Motif:ATCopia62_I-int	1	11950	99.9330991805		Motif:Copia-7_TA-I	3	83002	97.0148207022		Motif:DNA9-17_Mad	3	80179	96.0354058619		Motif:Tx1-13_CGi	3	52847	95.2181041783		Motif:RNSAT1c	1	30736	97.5746031746																	Motif:BEL-3_GA-I	1	2534	99.0617670055
Motif:ATCopia38B_I-int	1	11951	99.9414617829		Motif:Copia-68_PX-I	3	83005	97.0183271775		Motif:DNA-8-24_DR	3	80182	96.0389991496		Motif:TC4	3	52850	95.2235094863		Motif:RNERVK23-int	1	30737	97.5777777778																	Motif:BEL-37-I_DR	1	2535	99.1008600469
Motif:ATCopia34_I-int	1	11952	99.9498243853		Motif:Copia-5_BG-I	3	83008	97.0218336528		Motif:DNA-8-1_HM	3	80185	96.0425924373		Motif:STOWAWAY24_SB	3	52853	95.2289147943		Motif:RMER17D	1	30738	97.580952381																	Motif:BEL22-I_DR	1	2536	99.1399530884
Motif:Arnold2	1	11953	99.9581869878		Motif:Copia-55_GM-I	3	83011	97.0253401281		Motif:DNA8-10_AP	3	80188	96.0461857251		Motif:SSU-rRNA_Tps	3	52856	95.2343201023		Motif:RMER17A	1	30739	97.5841269841																	Motif:BEL-201_AA-I	1	2537	99.1790461298
Motif:ALPINE1B	1	11954	99.9665495902		Motif:Copia-47_VV-I	3	83014	97.0288466034		Motif:DNA6-1_SP	3	80191	96.0497790128		Motif:SINEC_Cf	3	52859	95.2397254104		Motif:RLTR22_Mur	1	30740	97.5873015873																	Motif:BEL-1_CGi-I	1	2538	99.2181391712
Motif:Afa_AS	1	11955	99.9749121927		Motif:Copia-44_VV-LTR	3	83017	97.0323530787		Motif:DNA6-1_MLP	3	80194	96.0533723005		Motif:SHACOP16_I_MT-int	3	52862	95.2451307184		Motif:RLTR20C2_MM	1	30741	97.5904761905																	Motif:BEL-18_CQ-LTR	1	2539	99.2572322127
Motif:ACCORD_I-int	1	11956	99.9832747951		Motif:Copia-2_LH-I	3	83020	97.035859554		Motif:DNA3-1_CGi	3	80197	96.0569655883		Motif:SAT2_CM	3	52865	95.2505360264		Motif:RLTR20C1_MM	1	30742	97.5936507937																	Motif:BEL-18_CGi-I	1	2540	99.2963252541
Motif:Academ-1_SK	1	11957	99.9916373976		Motif:Copia-28_SI-I	3	83023	97.0393660293		Motif:DNA-11_CGi	3	80200	96.060558876		Motif:Sagan-1_LB	3	52868	95.2559413344		Motif:RLG_scMaximus_4_1-I	1	30743	97.5968253968																	Motif:BEL-122_AA-I	1	2541	99.3354182955
Motif:AC9_ZM	1	11958	100		Motif:Copia24-ZM_I-int	3	83026	97.0428725046		Motif:DIRS-21_ACar	3	80203	96.0641521638		Motif:RTEX-1_NV	3	52871	95.2613466424		Motif:RLG_scMaximus_1_4-I	1	30744	97.6																	Motif:AvPB2	1	2542	99.374511337
					Motif:Copia-23_BG-I	3	83029	97.0463789798		Motif:DIRS-1_CR	3	80206	96.0677454515		Motif:RTEX-14_CGi	3	52874	95.2667519504		Motif:RLG_scIvana_1_3-I	1	30745	97.6031746032																	Motif:ATLINEIII	1	2543	99.4136043784
					Motif:Copia-1_PTri-I	3	83032	97.0498854551		Motif:Daphne-65_HMa	3	80209	96.0713387392		Motif:RT2	3	52877	95.2721572584		Motif:RLG_scDEL_1_6-I	1	30746	97.6063492063																	Motif:Athila_I-int	1	2544	99.4526974199
					Motif:Copia-1_ES-I	3	83035	97.0533919304		Motif:Daphne-15_SP	3	80212	96.074932027		Motif:RN10_I-int	3	52880	95.2775625664		Motif:RLG_scAngela_3_1-I	1	30747	97.6095238095																	Motif:Athila8B_I-int	1	2545	99.4917904613
					Motif:Copia-19_CQ-I	3	83038	97.0568984057		Motif:Dada-U1A_DR	3	80215	96.0785253147		Motif:RLG_scMaximus_1_5-I	3	52883	95.2829678745		Motif:Rex1-43_DRe	1	30748	97.6126984127																	Motif:ATGP5A_I-int	1	2546	99.5308835027
					Motif:Copia-13_PX-I	3	83041	97.060404881		Motif:CryptonV-12_CFl	3	80218	96.0821186025		Motif:RETROSAT5_LTR	3	52886	95.2883731825		Motif:Rex1-31_DRe	1	30749	97.6158730159																	Motif:ATDNAI27T9A	1	2547	99.5699765442
					Motif:Copia-12_GM-I	3	83044	97.0639113563		Motif:CRMA1_I-int	3	80221	96.0857118902		Motif:R1_DYa	3	52889	95.2937784905		Motif:REP-7_PBa	1	30750	97.619047619																	Motif:ATCopia97_I-int	1	2548	99.6090695856
					Motif:Copia-11B_DR-LTR	3	83047	97.0674178316		Motif:Crack-2_SP	3	80224	96.0893051779		Motif:Polinton-1_HM	3	52892	95.2991837985		Motif:RAVLIN5_MT	1	30751	97.6222222222																	Motif:ATCopia79LTR	1	2549	99.6481626271
					Motif:Copia-115_SB-I	3	83050	97.0709243069		Motif:CR1-Y2_Aves	3	80227	96.0928984657		Motif:Polinton-1_DY	3	52895	95.3045891065		Motif:R2I-1_PI	1	30752	97.6253968254																	Motif:ATCopia71_I-int	1	2550	99.6872556685
					Motif:CER5-I_CE	3	83053	97.0744307822		Motif:CR1-71_HM	3	80230	96.0964917534		Motif:Polinton-1_DK	3	52898	95.3099944145		Motif:R2B_TM	1	30753	97.6285714286																	Motif:ATCopia57_I-int	1	2551	99.7263487099
					Motif:CACTA_LP	3	83056	97.0779372575		Motif:CR1-40_BF	3	80233	96.1000850411		Motif:PNL_SM	3	52901	95.3153997225		Motif:R2-1_TG	1	30754	97.6317460317																	Motif:ArnoldY2	1	2552	99.7654417514
					Motif:CACTA-1_CapOwc	3	83059	97.0814437328		Motif:CR1-2_TCa	3	80236	96.1036783289		Motif:piggyBac-N2_XT	3	52904	95.3208050305		Motif:R2-1_SM	1	30755	97.6349206349																	Motif:Arnold2	1	2553	99.8045347928
					Motif:BEL-54_DRe-LTR	3	83062	97.0849502081		Motif:CR1-25_HM	3	80239	96.1072716166		Motif:piggyBac-2_XT	3	52907	95.3262103386		Motif:R1_DYa	1	30756	97.6380952381																	Motif:Ambal-2_TP	1	2554	99.8436278342
					Motif:BEL-50_DRe-LTR	3	83065	97.0884566833		Motif:CR1-22_SP	3	80242	96.1108649044		Motif:piggyBac-21_SM	3	52910	95.3316156466		Motif:R1-3_DBp	1	30757	97.6412698413																	Motif:AluJr4	1	2555	99.8827208757
					Motif:BEL-4_SI-I	3	83068	97.0919631586		Motif:CR1-1B_CPB	3	80245	96.1144581921		Motif:piggyBac-1_Mcir	3	52913	95.3370209546		Motif:Proto1-3_NG	1	30758	97.6444444444																	Motif:ALR/Alpha	1	2556	99.9218139171
					Motif:BEL-219_AA-LTR	3	83071	97.0954696339		Motif:CR1-10_BF	3	80248	96.1180514798		Motif:Penelope-12_XT	3	52916	95.3424262626		Motif:PRIMA4-int	1	30759	97.6476190476																	Motif:Academ-3_Aplcal	1	2557	99.9609069586
					Motif:ATENSPM10	3	83074	97.0989761092		Motif:Copia-9_TA-I	3	80251	96.1216447676		Motif:P-1_AllMac	3	52919	95.3478315706		Motif:POPGY1_LTR	1	30760	97.6507936508																	Motif:Academ-2_ADi	1	2558	100
					Motif:Academ-3_SP	3	83077	97.1024825845		Motif:Copia-85_VV-I	3	80254	96.1252380553		Motif:ONSATB	3	52922	95.3532368786		Motif:POPGY1_I-int	1	30761	97.653968254
					Motif:Academ-1_SK	3	83080	97.1059890598		Motif:Copia-73_BRa-I	3	80257	96.1288313431		Motif:Mutsu-2_SK	3	52925	95.3586421866		Motif:POPCOP2_I-int	1	30762	97.6571428571
					Motif:ZMCopia1_I-int	2	83082	97.10832671		Motif:Copia-55_SB-I	3	80260	96.1324246308		Motif:MuDR-1_LHu	3	52928	95.3640474946		Motif:POPCOP1_I-int	1	30763	97.6603174603
					Motif:VHARB4_VV	2	83084	97.1106643602		Motif:Copia-55_PX-I	3	80263	96.1360179185		Motif:MERMITE-18	3	52931	95.3694528027		Motif:polypyrimidine	1	30764	97.6634920635
					Motif:Vandal7	2	83086	97.1130020104		Motif:Copia-4_Cfl-I	3	80266	96.1396112063		Motif:MER4-int	3	52934	95.3748581107		Motif:Polinton-4_NVi	1	30765	97.6666666667
					Motif:Vandal3	2	83088	97.1153396606		Motif:Copia-47_VV-I	3	80269	96.143204494		Motif:Maui	3	52937	95.3802634187		Motif:Polinton-3_TC	1	30766	97.6698412698
					Motif:TX1_FR1	2	83090	97.1176773108		Motif:Copia-41_SB-I	3	80272	96.1467977817		Motif:Mariner-6_HM	3	52940	95.3856687267		Motif:Polinton-3_CI	1	30767	97.673015873
					Motif:Tx1-6_AMi	2	83092	97.120014961		Motif:COPIA3-I_LC	3	80275	96.1503910695		Motif:Mariner-52N1_HSal	3	52943	95.3910740347		Motif:Polinton-2_AMi	1	30768	97.6761904762
					Motif:Tx1-5_PM	2	83094	97.1223526112		Motif:Copia-39_Pru-I	3	80278	96.1539843572		Motif:Mariner-4_LHu	3	52946	95.3964793427		Motif:Polinton-1_LCh	1	30769	97.6793650794
					Motif:twinID-Spe	2	83096	97.1246902613		Motif:Copia-38_PIT-I	3	80281	96.157577645		Motif:LTR51D_MD	3	52949	95.4018846507		Motif:Polinton-1_CGi	1	30770	97.6825396825
					Motif:TUB4	2	83098	97.1270279115		Motif:Copia-30_PX-I	3	80284	96.1611709327		Motif:LTR18D_ML	3	52952	95.4072899587		Motif:PNL_SM	1	30771	97.6857142857
					Motif:tRNA-Pro-CCG	2	83100	97.1293655617		Motif:COPIA2-I_LC	3	80287	96.1647642204		Motif:L2_AC_16	3	52955	95.4126952668		Motif:Pigibakku	1	30772	97.6888888889
					Motif:tRNA-Leu-TTA	2	83102	97.1317032119		Motif:Copia-29_ST-I	3	80290	96.1683575082		Motif:L2-12b_Lch	3	52958	95.4181005748		Motif:piggyBac-N7_DR	1	30773	97.6920634921
					Motif:tRNA-Leu-CTA	2	83104	97.1340408621		Motif:Copia-26_Pru-I	3	80293	96.1719507959		Motif:L1-N3_FV	3	52961	95.4235058828		Motif:PiggyBac-6_HM	1	30774	97.6952380952
					Motif:TLD2	2	83106	97.1363785123		Motif:copia-1-I_AF	3	80296	96.1755440837		Motif:L1-93_Cis	3	52964	95.4289111908		Motif:piggyBac-5_CGi	1	30775	97.6984126984
					Motif:TE2c_TP	2	83108	97.1387161625		Motif:Copia-1_CMe-I	3	80299	96.1791373714		Motif:L1-80_ACar	3	52967	95.4343164988		Motif:PiggyBac-1_Nha	1	30776	97.7015873016
					Motif:TE-11_NV	2	83110	97.1410538127		Motif:Copia-1_AC-I	3	80302	96.1827306591		Motif:L1-7_GM	3	52970	95.4397218068		Motif:piggyBac-1_Mcir	1	30777	97.7047619048
					Motif:TC4	2	83112	97.1433914629		Motif:Copia-19_Mad-I	3	80305	96.1863239469		Motif:L1-59_DR	3	52973	95.4451271148		Motif:piggyBac-1_DR	1	30778	97.7079365079
					Motif:Tad1-30_BG	2	83114	97.1457291131		Motif:Copia-16_EPa-I	3	80308	96.1899172346		Motif:L1-55_ACar	3	52976	95.4505324228		Motif:Pifo_I-int	1	30779	97.7111111111
					Motif:SSU-rRNA_Hsa	2	83116	97.1480667633		Motif:Copia15-VV_I-int	3	80311	96.1935105223		Motif:L1-45_AAe	3	52979	95.4559377309		Motif:PGCOPIAX1	1	30780	97.7142857143
					Motif:Sola3-3_PS	2	83118	97.1504044135		Motif:Copia-143_SB-I	3	80314	96.1971038101		Motif:L1-3_Mad	3	52982	95.4613430389		Motif:Penelope4_XT	1	30781	97.7174603175
					Motif:Sola3-1_EmiHux	2	83120	97.1527420637		Motif:Copia12-ZM_I-int	3	80317	96.2006970978		Motif:L1-3_DR	3	52985	95.4667483469		Motif:Penelope-3_NV	1	30782	97.7206349206
					Motif:Sola1-1_HM	2	83122	97.1550797139		Motif:Copia12-NVi_I-int	3	80320	96.2042903856		Motif:Kolobok-1_NV	3	52988	95.4721536549		Motif:Penelope1D_XT	1	30783	97.7238095238
					Motif:Sola1-1_Dpulex	2	83124	97.1574173641		Motif:Copia-10_ADe-I	3	80323	96.2078836733		Motif:Kiri-18_AAe	3	52991	95.4775589629		Motif:Penelope1C_XT	1	30784	97.726984127
					Motif:SLACS_TB	2	83126	97.1597550143		Motif:Copia-10_AA-I	3	80326	96.211476961		Motif:Jockey-6_DRh	3	52994	95.4829642709		Motif:Penelope-1C_CPB	1	30785	97.7301587302
					Motif:SHALINE7_MT	2	83128	97.1620926645		Motif:Copia-107_BRa-I	3	80329	96.2150702488		Motif:ISL2EU-6_CGi	3	52997	95.4883695789		Motif:Penelope-15_HM	1	30786	97.7333333333
					Motif:SFV1-8_Gav-I	2	83130	97.1644303146		Motif:Copia-104_GM-I	3	80332	96.2186635365		Motif:ISL2EU-11_CGi	3	53000	95.4937748869		Motif:Penelope-13_XT	1	30787	97.7365079365
					Motif:SFV1-4_AMi-I	2	83132	97.1667679648		Motif:Chompy-7_Croc	3	80335	96.2222568243		Motif:I-3_AC	3	53003	95.499180195		Motif:P-8_HM	1	30788	97.7396825397
					Motif:SFV1-18_Gav-LTR	2	83134	97.169105615		Motif:Chapaev-7_HM	3	80338	96.225850112		Motif:HELMET4	3	53006	95.504585503		Motif:P-28_HM	1	30789	97.7428571429
					Motif:SAT-8_DR	2	83136	97.1714432652		Motif:Chapaev-20_HM	3	80341	96.2294433997		Motif:HelitronY2	3	53009	95.509990811		Motif:P-1N1_DBp	1	30790	97.746031746
					Motif:SAT-1_PVa	2	83138	97.1737809154		Motif:CASAT_HD	3	80344	96.2330366875		Motif:Helitron-5_Mad	3	53012	95.515396119		Motif:P-1_AP	1	30791	97.7492063492
					Motif:SAT-1_AMi	2	83140	97.1761185656		Motif:BEL-30_CQ-I	3	80347	96.2366299752		Motif:Helitron-4_NVi	3	53015	95.520801427		Motif:P1_AG	1	30792	97.7523809524
					Motif:SAT-15_DR	2	83142	97.1784562158		Motif:BARBARA_TM-int	3	80350	96.2402232629		Motif:Helitron4	3	53018	95.526206735		Motif:ONSATB	1	30793	97.7555555556
					Motif:RTE-7_SP	2	83144	97.180793866		Motif:ATREP10	3	80353	96.2438165507		Motif:Helitron-3_NVi	3	53021	95.531612043		Motif:Ogre-VP1_LTR	1	30794	97.7587301587
					Motif:RTE-5_AMi	2	83146	97.1831315162		Motif:ATENSPM5	3	80356	96.2474098384		Motif:Helitron-2_SIn	3	53024	95.537017351		Motif:Ogre-PT3_LTR	1	30795	97.7619047619
					Motif:RLG_scDEL_6_1-I	2	83148	97.1854691664		Motif:ATCopia95LTR	3	80359	96.2510031262		Motif:Helitron-2N_DW	3	53027	95.5424226591		Motif:Ogre-PT1_I-int	1	30796	97.7650793651
					Motif:RLG_scAngela_3_1-I	2	83150	97.1878068166		Motif:ArnoldY1	3	80362	96.2545964139		Motif:hATw-2_SP	3	53030	95.5478279671		Motif:Ogre-MT4_I-int	1	30797	97.7682539683
					Motif:Rhin-1	2	83152	97.1901444668		Motif:Ag-Jen-11	3	80365	96.2581897016		Motif:hAT-N76_DR	3	53033	95.5532332751		Motif:NONAUT-5	1	30798	97.7714285714
					Motif:Rex1-26_DRe	2	83154	97.192482117		Motif:AFROSINE	3	80368	96.2617829894		Motif:hAT-N75_DR	3	53036	95.5586385831		Motif:nMar-5_Hmel	1	30799	97.7746031746
					Motif:RETROSAT4_I-int	2	83156	97.1948197672		Motif:ACROBAT1	3	80371	96.2653762771		Motif:hAT-N1_SP	3	53039	95.5640438911		Motif:Nimb-1_AAe	1	30800	97.7777777778
					Motif:REP-6_PBa	2	83158	97.1971574174		Motif:Academ-3_SP	3	80374	96.2689695649		Motif:hAT-N1_DEl	3	53042	95.5694491991		Motif:NICER-int	1	30801	97.780952381
					Motif:REP131	2	83160	97.1994950676		Motif:Zisupton-5_DR	2	80376	96.27136509		Motif:hAT-N13_AMi	3	53045	95.5748545071		Motif:Neptune1_Ac	1	30802	97.7841269841
					Motif:Rehavkus-2_NVi	2	83162	97.2018327178		Motif:ZFERV_I-int	2	80378	96.2737606152		Motif:hAT-5_SBi	3	53048	95.5802598151		Motif:MYSERV6-int	1	30803	97.7873015873
					Motif:RandI-5	2	83164	97.2041703679		Motif:ZFERV-2N2-I_DR	2	80380	96.2761561403		Motif:HAT5N_CI	3	53051	95.5856651232		Motif:MuDR-N9_SBi	1	30804	97.7904761905
					Motif:RAM4_I-int	2	83166	97.2065080181		Motif:Zator-1_DPu	2	80382	96.2785516655		Motif:hAT-3_FV	3	53054	95.5910704312		Motif:MuDR-N6_SBi	1	30805	97.7936507937
					Motif:R7Ag2	2	83168	97.2088456683		Motif:Ves2_ML	2	80384	96.2809471906		Motif:hAT-333_Crp	3	53057	95.5964757392		Motif:MuDR-6_GM	1	30806	97.7968253968
					Motif:R1-12_DWi	2	83170	97.2111833185		Motif:Vandal14	2	80386	96.2833427158		Motif:hAT-20_Mad	3	53060	95.6018810472		Motif:MuDR-6_FV	1	30807	97.8
					Motif:pSOS_SO	2	83172	97.2135209687		Motif:Vandal13	2	80388	96.285738241		Motif:hAT-1_SP	3	53063	95.6072863552		Motif:MuDR-3_SBi	1	30808	97.8031746032
					Motif:Poseidon-N5_PM	2	83174	97.2158586189		Motif:Vandal11	2	80390	96.2881337661		Motif:hAT-12_VVi	3	53066	95.6126916632		Motif:MuDr-1x_SP	1	30809	97.8063492063
					Motif:Polinton-N1B_NV	2	83176	97.2181962691		Motif:Urukhai_Cis	2	80392	96.2905292913		Motif:Harbinger-5_CGi	3	53069	95.6180969712		Motif:MuDR1x_AP	1	30810	97.8095238095
					Motif:Polinton-5_PBa	2	83178	97.2205339193		Motif:UnaL2	2	80394	96.2929248164		Motif:Harbinger-2_GA	3	53072	95.6235022792		Motif:MuDR-18_VV	1	30811	97.8126984127
					Motif:Polinton-3_TC	2	83180	97.2228715695		Motif:U5	2	80396	96.2953203416		Motif:Harbinger-21_PGr	3	53075	95.6289075873		Motif:MuDR-14_GM	1	30812	97.8158730159
					Motif:Polinton-3_SP	2	83182	97.2252092197		Motif:Tx1-5_DR	2	80398	96.2977158668		Motif:Harbinger-10_PGr	3	53078	95.6343128953		Motif:MTANGA_I-int	1	30813	97.819047619
					Motif:Polinton-2_SM	2	83184	97.2275468699		Motif:Tx1-4B_Crp	2	80400	96.3001113919		Motif:Harbinger	3	53081	95.6397182033		Motif:MSU1	1	30814	97.8222222222
					Motif:Polinton-2_DBi	2	83186	97.2298845201		Motif:Tx1-3_CGi	2	80402	96.3025069171		Motif:HAL1-2A_Cho	3	53084	95.6451235113		Motif:MMETn-int	1	30815	97.8253968254
					Motif:piggyBac-N2A_XT	2	83188	97.2322221703		Motif:Tx1-1_DR	2	80404	96.3049024422		Motif:Gypsy-9-I_CR	3	53087	95.6505288193		Motif:MLT2B5	1	30816	97.8285714286
					Motif:PiggyBac-1_PhaTri	2	83190	97.2345598205		Motif:Tx1-16_DR	2	80406	96.3072979674		Motif:Gypsy-9_DBi-LTR	3	53090	95.6559341273		Motif:MinoAg1	1	30817	97.8317460317
					Motif:MuSHAN_MT	2	83192	97.2368974707		Motif:Tx1-13_Lch	2	80408	96.3096934926		Motif:Gypsy85-I_DR	3	53093	95.6613394353		Motif:MERMITE18C	1	30818	97.8349206349
					Motif:MULE-1_Cglob	2	83194	97.2392351209		Motif:Tx1-12_CQ	2	80410	96.3120890177		Motif:Gypsy7-NVi_I-int	3	53096	95.6667447433		Motif:Merlin1B_SM	1	30819	97.8380952381
					Motif:MuDR1_ZM	2	83196	97.2415727711		Motif:Tx1-11_Crp	2	80412	96.3144845429		Motif:Gypsy-6_PPc-I	3	53099	95.6721500514		Motif:MER4-int	1	30820	97.8412698413
					Motif:MuDR-1_LHu	2	83198	97.2439104212		Motif:Tx1-10_Crp	2	80414	96.316880068		Motif:Gypsy55-I_AG	3	53102	95.6775553594		Motif:MER34B-int	1	30821	97.8444444444
					Motif:MinoAg1	2	83200	97.2462480714		Motif:twinID-Spe	2	80416	96.3192755932		Motif:Gypsy-52_Mad-I	3	53105	95.6829606674		Motif:MER34B_EC	1	30822	97.8476190476
					Motif:MER21-int	2	83202	97.2485857216		Motif:TUBE2	2	80418	96.3216711184		Motif:Gypsy-50_GA-LTR	3	53108	95.6883659754		Motif:Meg_PVa	1	30823	97.8507936508
					Motif:MdoLTR3-int	2	83204	97.2509233718		Motif:tRNAPro_CB	2	80420	96.3240666435		Motif:Gypsy-50_CQ-I	3	53111	95.6937712834		Motif:MAX_I-int	1	30824	97.853968254
					Motif:Maximus_I-int	2	83206	97.253261022		Motif:tRNA-Leu-CTY	2	80422	96.3264621687		Motif:Gypsy-4_Trm-I	3	53114	95.6991765914		Motif:MARS2_AI	1	30825	97.8571428571
					Motif:Mariner-N8_SIn	2	83208	97.2555986722		Motif:tRNAArgACG_CB	2	80424	96.3288576938		Motif:Gypsy47-I_DR	3	53117	95.7045818994		Motif:Mariner-N5B_PM	1	30826	97.8603174603
					Motif:Mariner-9_CGi	2	83210	97.2579363224		Motif:TRE3B	2	80426	96.331253219		Motif:Gypsy-47_CQ-LTR	3	53120	95.7099872074		Motif:Mariner-N5B_DR	1	30827	97.8634920635
					Motif:Mariner-91_HSal	2	83212	97.2602739726		Motif:Transib-1_HM	2	80428	96.3336487441		Motif:Gypsy-44_AA-I	3	53123	95.7153925155		Motif:Mariner-N39_HSal	1	30828	97.8666666667
					Motif:MAG	2	83214	97.2626116228		Motif:TIP100	2	80430	96.3360442693		Motif:Gypsy-40_BD-I	3	53126	95.7207978235		Motif:Mariner-N1C_ACar	1	30829	97.8698412698
					Motif:Lx10	2	83216	97.264949273		Motif:TE-8_CGi	2	80432	96.3384397945		Motif:Gypsy-34_CQ-I	3	53129	95.7262031315		Motif:MarinerL-1_AO	1	30830	97.873015873
					Motif:LTR4_Str	2	83218	97.2672869232		Motif:TDC1	2	80434	96.3408353196		Motif:Gypsy-29-I_NVi	3	53132	95.7316084395		Motif:Mariner-8_PGr	1	30831	97.8761904762
					Motif:LTR-36_Crp	2	83220	97.2696245734		Motif:TART_B1	2	80436	96.3432308448		Motif:Gypsy-27_DP-I	3	53135	95.7370137475		Motif:Mariner-7_MLP	1	30832	97.8793650794
					Motif:LTR22_EE	2	83222	97.2719622236		Motif:TAR1	2	80438	96.3456263699		Motif:Gypsy-231_DR-LTR	3	53138	95.7424190555		Motif:Mariner-6_DR	1	30833	97.8825396825
					Motif:LTR-1_LHu-LTR	2	83224	97.2742998738		Motif:Tad1-73_BG	2	80440	96.3480218951		Motif:Gypsy-221_DR-LTR	3	53141	95.7478243635		Motif:Mariner-52N1_HSal	1	30834	97.8857142857
					Motif:LTR18F_ML	2	83226	97.276637524		Motif:T1	2	80442	96.3504174203		Motif:Gypsy-18_RO-I	3	53144	95.7532296715		Motif:Mariner-52_HSal	1	30835	97.8888888889
					Motif:LTR13A_Tbel	2	83228	97.2789751742		Motif:SZ-38_int-int	2	80444	96.3528129454		Motif:Gypsy-18_DBp-I	3	53147	95.7586349796		Motif:Mariner-3_PGr	1	30836	97.8920634921
					Motif:LTR-12_AMi	2	83230	97.2813128243		Motif:SZ-37_int-int	2	80446	96.3552084706		Motif:Gypsy-16_LCh-I	3	53150	95.7640402876		Motif:Mariner-3_CFl	1	30837	97.8952380952
					Motif:LSU-rRNA_Pfa	2	83232	97.2836504745		Motif:SP-D-Geo	2	80448	96.3576039957		Motif:Gypsy16-I_AG	3	53153	95.7694455956		Motif:Mariner-31_CGi	1	30838	97.8984126984
					Motif:LOOPERN4_DR	2	83234	97.2859881247		Motif:Sola3-3_PS	2	80450	96.3599995209		Motif:Gypsy-165_AA-I	3	53156	95.7748509036		Motif:Mariner3-1_CFl	1	30839	97.9015873016
					Motif:LINER1-2_NVi	2	83236	97.2883257749		Motif:Sola2-3_DPu	2	80452	96.3623950461		Motif:Gypsy15-I_SP	3	53159	95.7802562116		Motif:Mariner-2_Crp	1	30840	97.9047619048
					Motif:LINE1-18_SBi	2	83238	97.2906634251		Motif:Sola2-2_CGi	2	80454	96.3647905712		Motif:Gypsy-14_DAn-I	3	53162	95.7856615196		Motif:Mariner-1_MLP	1	30841	97.9079365079
					Motif:LINE1-11_ZM	2	83240	97.2930010753		Motif:Sola1-9_AP	2	80456	96.3671860964		Motif:Gypsy-13_SMo-LTR	3	53165	95.7910668276		Motif:Mariner-1_GM	1	30842	97.9111111111
					Motif:L2_AC_15	2	83242	97.2953387255		Motif:SLIDE	2	80458	96.3695816215		Motif:Gypsy-12_SI-I	3	53168	95.7964721356		Motif:Mariner-13N4_CGi	1	30843	97.9142857143
					Motif:L2-8_AAe	2	83244	97.2976763757		Motif:SLACS_TB	2	80460	96.3719771467		Motif:Ginger1-7_HM	3	53171	95.8018774436		Motif:MamSINE1	1	30844	97.9174603175
					Motif:L2-3_Cis	2	83246	97.3000140259		Motif:SINE_CP1	2	80462	96.3743726718		Motif:Ginger1-1_DR	3	53174	95.8072827517		Motif:Lx9	1	30845	97.9206349206
					Motif:L2-2_Croc	2	83248	97.3023516761		Motif:SINE2-1_CQ	2	80464	96.376768197		Motif:FUGUREP2	3	53177	95.8126880597		Motif:LTR-9_Mad	1	30846	97.9238095238
					Motif:L1-95_ACar	2	83250	97.3046893263		Motif:SINE2-1_BT	2	80466	96.3791637222		Motif:EnSpm-4_HV	3	53180	95.8180933677		Motif:LTR-85_Gav	1	30847	97.926984127
					Motif:L1-6_VC	2	83252	97.3070269765		Motif:SIMPLEHAT2	2	80468	96.3815592473		Motif:EnSpm-2_FV	3	53183	95.8234986757		Motif:LTR-7_ACar	1	30848	97.9301587302
					Motif:L1-60_DR	2	83254	97.3093646267		Motif:Shinagawa-6_AAe	2	80470	96.3839547725		Motif:EnSpm-1_TM	3	53186	95.8289039837		Motif:LTR72_DN	1	30849	97.9333333333
					Motif:L1-5_LA	2	83256	97.3117022769		Motif:SHACOP7_I_MT-int	2	80472	96.3863502976		Motif:EnSpm1_TD	3	53189	95.8343092917		Motif:LTR67_MD	1	30850	97.9365079365
					Motif:L1-1G_Cpo	2	83258	97.3140399271		Motif:SATH1_PL	2	80474	96.3887458228		Motif:EnSpm1n_AT	3	53192	95.8397145997		Motif:LTR-47_Gav	1	30851	97.9396825397
					Motif:KoshiTn1	2	83260	97.3163775773		Motif:Sagan-1_MLP	2	80476	96.391141348		Motif:DNA8-9_DR	3	53195	95.8451199077		Motif:LTR3_ET	1	30852	97.9428571429
					Motif:Kolobok-N16_NV	2	83262	97.3187152275		Motif:Sagan-1_ALai	2	80478	96.3935368731		Motif:DNA8-15_CQ	3	53198	95.8505252158		Motif:LTR38-int	1	30853	97.946031746
					Motif:KolobokE-2_AP	2	83264	97.3210528776		Motif:SABRINA_SC-int	2	80480	96.3959323983		Motif:DNA6-1_CQ	3	53201	95.8559305238		Motif:LTR-36_Crp	1	30854	97.9492063492
					Motif:Jockey-9_DPer	2	83266	97.3233905278		Motif:RTEX-19_CGi	2	80482	96.3983279234		Motif:DNA-4-5_DR	3	53204	95.8613358318		Motif:LTR1A2_ML	1	30855	97.9523809524
					Motif:Jockey-5_DVi	2	83268	97.325728178		Motif:RTEX-10_ACar	2	80484	96.4007234486		Motif:DNA4-4B_CGi	3	53207	95.8667411398		Motif:LTR18F_ML	1	30856	97.9555555556
					Motif:Jockey-4_DRh	2	83270	97.3280658282		Motif:RTE-9_CPB	2	80486	96.4031189738		Motif:DNA2-9_DR	3	53210	95.8721464478		Motif:LTR18D_ML	1	30857	97.9587301587
					Motif:ISL2EU-N5B_CGi	2	83272	97.3304034784		Motif:RTE-7_CPB	2	80488	96.4055144989		Motif:DIP	3	53213	95.8775517558		Motif:LTR168b_MD	1	30858	97.9619047619
					Motif:ISL2EU-N1_CGi	2	83274	97.3327411286		Motif:RTE-1_PD	2	80490	96.4079100241		Motif:Dada-U6_GA	3	53216	95.8829570638		Motif:LTR160B_MD	1	30859	97.9650793651
					Motif:ISL2EU-16_CGi	2	83276	97.3350787788		Motif:RNSAT1a	2	80492	96.4103055492		Motif:CSINE2B	3	53219	95.8883623718		Motif:LTR-14_Crp	1	30860	97.9682539683
					Motif:IS3EU-2N1_CGi	2	83278	97.337416429		Motif:RMER4B	2	80494	96.4127010744		Motif:CSINE1	3	53222	95.8937676799		Motif:LTR13B_EC	1	30861	97.9714285714
					Motif:ID2	2	83280	97.3397540792		Motif:RLTR45-int	2	80496	96.4150965996		Motif:CR1-X3_Pass	3	53225	95.8991729879		Motif:LTR131a_MD	1	30862	97.9746031746
					Motif:HMSBEAGLE_I-int	2	83282	97.3420917294		Motif:RLG_scTat_7_1-I	2	80498	96.4174921247		Motif:CR1-73_AAe	3	53228	95.9045782959		Motif:LTR-12_AMi	1	30863	97.9777777778
					Motif:HET-A_DV	2	83284	97.3444293796		Motif:RLG_scMaximus_1_2-I	2	80500	96.4198876499		Motif:CR1-45_HM	3	53231	95.9099836039		Motif:LTR11_Ami	1	30864	97.980952381
					Motif:HERVL-int	2	83286	97.3467670298		Motif:Rex1-54_DR	2	80502	96.422283175		Motif:CR1-25_HM	3	53234	95.9153889119		Motif:LTR118_MD	1	30865	97.9841269841
					Motif:HelitronY1D	2	83288	97.34910468		Motif:REX1-2_XT	2	80504	96.4246787002		Motif:Copia-99_Mad-I	3	53237	95.9207942199		Motif:LSU-rRNA_Hsa	1	30866	97.9873015873
					Motif:Helitron-N3_ZM	2	83290	97.3514423302		Motif:Rex1-21_DRe	2	80506	96.4270742253		Motif:Copia-99_GM-LTR	3	53240	95.9261995279		Motif:LSU-rRNA_Giardia	1	30867	97.9904761905
					Motif:Helitron-N35_CGi	2	83292	97.3537799804		Motif:REP-6_PBa	2	80508	96.4294697505		Motif:Copia-95_ST-LTR	3	53243	95.9316048359		Motif:LSU-rRNA_Dme	1	30868	97.9936507937
					Motif:Helitron-N1_SP	2	83294	97.3561176306		Motif:REP-1_DTa	2	80510	96.4318652757		Motif:Copia-87_VV-I	3	53246	95.937010144		Motif:LSU-rRNA_Cel	1	30869	97.9968253968
					Motif:Helitron1_Dmoj	2	83296	97.3584552808		Motif:Rehavkus-2_HR	2	80512	96.4342608008		Motif:Copia-7_ES-I	3	53249	95.942415452		Motif:LOOPERN2_DR	1	30870	98
					Motif:Helitron-1_AC	2	83298	97.3607929309		Motif:Rehavkus-1_DY	2	80514	96.436656326		Motif:Copia-39_Pru-I	3	53252	95.94782076		Motif:LMR1_LM	1	30871	98.0031746032
					Motif:hATw-2_SP	2	83300	97.3631305811		Motif:RC123	2	80516	96.4390518511		Motif:Copia2-I_CR	3	53255	95.953226068		Motif:LINE1-36_SBi	1	30872	98.0063492063
					Motif:hATw-1_LV	2	83302	97.3654682313		Motif:RBTVL	2	80518	96.4414473763		Motif:Copia-2_Adi-I	3	53258	95.958631376		Motif:LINE1-24_SBi	1	30873	98.0095238095
					Motif:hAT-N76_DR	2	83304	97.3678058815		Motif:R7Ag2	2	80520	96.4438429015		Motif:Copia-20_ST-I	3	53261	95.964036684		Motif:LatiHarb1-N4C	1	30874	98.0126984127
					Motif:hAT-N35B_DR	2	83306	97.3701435317		Motif:R2A_NVi	2	80522	96.4462384266		Motif:Copia-1_RP-LTR	3	53264	95.969441992		Motif:LatiHarb1-N1	1	30875	98.0158730159
					Motif:hAT-63_HM	2	83308	97.3724811819		Motif:Pt1	2	80524	96.4486339518		Motif:COPIA1-I_OS	3	53267	95.9748473		Motif:L2_Plat1b	1	30876	98.019047619
					Motif:hAT6-2_NV	2	83310	97.3748188321		Motif:Proto2-5_CS1	2	80526	96.4510294769		Motif:Copia-19_GM-LTR	3	53270	95.9802526081		Motif:L2_AC_10	1	30877	98.0222222222
					Motif:hAT-5_SBi	2	83312	97.3771564823		Motif:polypurine	2	80528	96.4534250021		Motif:Copia-19_CQ-I	3	53273	95.9856579161		Motif:L1MdV_II	1	30878	98.0253968254
					Motif:HAT-4N3_Mad	2	83314	97.3794941325		Motif:Polinton-4_NVi	2	80530	96.4558205273		Motif:Copia-13_FV-I	3	53276	95.9910632241		Motif:L1MB3_EC	1	30879	98.0285714286
					Motif:hAT-25N1_DR	2	83316	97.3818317827		Motif:Polinton-2_SP	2	80532	96.4582160524		Motif:Copia12-ZM_I-int	3	53279	95.9964685321		Motif:L1_Ele4	1	30880	98.0317460317
					Motif:hAT-208_Ami	2	83318	97.3841694329		Motif:Polinton-2_DR	2	80534	96.4606115776		Motif:Copia-107_AA-I	3	53282	96.0018738401		Motif:L1_AC_17	1	30881	98.0349206349
					Motif:hAT-1_FV	2	83320	97.3865070831		Motif:Polinton-1_SP	2	80536	96.4630071027		Motif:CACTA-1_Roryzae	3	53285	96.0072791481		Motif:L1-9_GM	1	30882	98.0380952381
					Motif:hAT-18_ZM	2	83322	97.3888447333		Motif:Polinton-1_EI	2	80538	96.4654026279		Motif:CACTA-1_PB	3	53288	96.0126844561		Motif:L1-95_ACar	1	30883	98.0412698413
					Motif:hAT-17B_Croc	2	83324	97.3911823835		Motif:Polinton-1_DEu	2	80540	96.4677981531		Motif:BTLTR1D2	3	53291	96.0180897641		Motif:L1-88_ACar	1	30884	98.0444444444
					Motif:Harbinger-N5A_NV	2	83326	97.3935200337		Motif:piggyBac-N3_BF	2	80542	96.4701936782		Motif:BovB_PMo	3	53294	96.0234950722		Motif:L1-87_ACar	1	30885	98.0476190476
					Motif:Harbinger-N15_DR	2	83328	97.3958576839		Motif:piggyBac-N1_NV	2	80544	96.4725892034		Motif:BEL-62_DRe-LTR	3	53297	96.0289003802		Motif:L1-6_CPa	1	30886	98.0507936508
					Motif:Harbinger-N12_DR	2	83330	97.3981953341		Motif:PiggyBac-1_PhaTri	2	80546	96.4749847285		Motif:BEL-10_DWil-I	3	53300	96.0343056882		Motif:L1-66_ACar	1	30887	98.053968254
					Motif:Harbinger-4_CGi	2	83332	97.4005329842		Motif:piggyBac-14_SM	2	80548	96.4773802537		Motif:ATLINE1_5	3	53303	96.0397109962		Motif:L1-46_DR	1	30888	98.0571428571
					Motif:Harbinger-3_LCh	2	83334	97.4028706344		Motif:Penelope-8_XT	2	80550	96.4797757788		Motif:ATCopia80_I-int	3	53306	96.0451163042		Motif:L1-40_DR	1	30889	98.0603174603
					Motif:Harbinger3_DR	2	83336	97.4052082846		Motif:P-1_CR	2	80552	96.482171304		Motif:ATCopia6I	3	53309	96.0505216122		Motif:L1-3_GM	1	30890	98.0634920635
					Motif:Harbinger-3_BF	2	83338	97.4075459348		Motif:P-16_HM	2	80554	96.4845668292		Motif:ATCopia28_I-int	3	53312	96.0559269202		Motif:L1-38_ACar	1	30891	98.0666666667
					Motif:Harbinger2N_TP	2	83340	97.409883585		Motif:P-11_HM	2	80556	96.4869623543		Motif:Waldo-3_AAe	2	53314	96.0595304589		Motif:L1-33_DR	1	30892	98.0698412698
					Motif:Harbinger-2_GA	2	83342	97.4122212352		Motif:ORTE-6_AAe	2	80558	96.4893578795		Motif:Vandal9	2	53316	96.0631339976		Motif:L1-15_Mad	1	30893	98.073015873
					Motif:Harbinger1_DR	2	83344	97.4145588854		Motif:OposCharlie1	2	80560	96.4917534046		Motif:Vandal2	2	53318	96.0667375363		Motif:L1-13_GM	1	30894	98.0761904762
					Motif:Harbinger1_AG	2	83346	97.4168965356		Motif:Mx	2	80562	96.4941489298		Motif:Tx1-6_DR	2	53320	96.0703410749		Motif:Kolobok-N2_LHu	1	30895	98.0793650794
					Motif:Harbinger-1_AAe	2	83348	97.4192341858		Motif:MuTRI_MT	2	80564	96.496544455		Motif:Tx1-4_CGi	2	53322	96.0739446136		Motif:KolobokE-4_AP	1	30896	98.0825396825
					Motif:HARB-2_STu	2	83350	97.421571836		Motif:MuDR-7_GM	2	80566	96.4989399801		Motif:Tx1-3_PM	2	53324	96.0775481523		Motif:Kolobok-8_LMi	1	30897	98.0857142857
					Motif:HARB-10_SBi	2	83352	97.4239094862		Motif:MuDR-6_GM	2	80568	96.5013355053		Motif:Tx1-3_DR	2	53326	96.081151691		Motif:Kolobok-6_CGi	1	30898	98.0888888889
					Motif:HAL1-2a_MD	2	83354	97.4262471364		Motif:MuDR-4_VV	2	80570	96.5037310304		Motif:Tx1-2_Crp	2	53328	96.0847552296		Motif:Kolobok-2_HM	1	30899	98.0920634921
					Motif:Gypsy-9_PX-I	2	83356	97.4285847866		Motif:MUDR4_CB	2	80572	96.5061265556		Motif:Tx1-29_DR	2	53330	96.0883587683		Motif:Kolobok-1_LG	1	30900	98.0952380952
					Motif:Gypsy-9_PBa-I	2	83358	97.4309224368		Motif:MuDR-3_MLP	2	80574	96.5085220808		Motif:Tx1-13_BF	2	53332	96.091962307		Motif:Kiri-35_AAe	1	30901	98.0984126984
					Motif:Gypsy-9_DMoj-LTR	2	83360	97.433260087		Motif:MuDR-2_GM	2	80576	96.5109176059		Motif:Tx1-10_CGi	2	53334	96.0955658457		Motif:Jockey-8_DEu	1	30902	98.1015873016
					Motif:Gypsy-94_CQ-I	2	83362	97.4355977372		Motif:MuDR-22_VV	2	80578	96.5133131311		Motif:TUB3	2	53336	96.0991693843		Motif:Jockey-3_DGri	1	30903	98.1047619048
					Motif:Gypsy-93_ZM-I	2	83364	97.4379353873		Motif:MuDR-1_DT	2	80580	96.5157086562		Motif:TUB2B	2	53338	96.102772923		Motif:Jockey-2_DVi	1	30904	98.1079365079
					Motif:Gypsy-8_RP-LTR	2	83366	97.4402730375		Motif:MuDR-19_SBi	2	80582	96.5181041814		Motif:tRNA-Val-GTG	2	53340	96.1063764617		Motif:Jockey-2_DGri	1	30905	98.1111111111
					Motif:Gypsy-8_LBS-I	2	83368	97.4426106877		Motif:MuDR-13_CB	2	80584	96.5204997065		Motif:tRNA-Ser-TCY	2	53342	96.1099800004		Motif:Jockey-1_DYa	1	30906	98.1142857143
					Motif:Gypsy85-I_DR	2	83370	97.4449483379		Motif:MuDR-12B_CB	2	80586	96.5228952317		Motif:tRNA-Ala-GCY	2	53344	96.113583539		Motif:Jockey-1_DT	1	30907	98.1174603175
					Motif:Gypsy-83_GM-I	2	83372	97.4472859881		Motif:MuDR-11N_VV	2	80588	96.5252907569		Motif:TRANSIB3	2	53346	96.1171870777		Motif:ISL2EU-N5B_CGi	1	30908	98.1206349206
					Motif:Gypsy7-VV_I-int	2	83374	97.4496236383		Motif:MtPH-A6-3-Ia	2	80590	96.527686282		Motif:TC2_FR4a	2	53348	96.1207906164		Motif:ISL2EU-N1_CGi	1	30909	98.1238095238
					Motif:Gypsy-7_CPu-I	2	83376	97.4519612885		Motif:MtPH-A5-Ia	2	80592	96.5300818072		Motif:TABOR_I-int	2	53350	96.1243941551		Motif:ISL2EU-7_CGi	1	30910	98.126984127
					Motif:Gypsy77-I_DR	2	83378	97.4542989387		Motif:MSAT-3_DR	2	80594	96.5324773323		Motif:SZ-52_int-int	2	53352	96.1279976937		Motif:ISL2EU-6_CFl	1	30911	98.1301587302
					Motif:Gypsy-74_CQ-I	2	83380	97.4566365889		Motif:MSAT-1_AAe	2	80596	96.5348728575		Motif:SUKKULA3_TM-int	2	53354	96.1316012324		Motif:ISL2EU-3_CFl	1	30912	98.1333333333
					Motif:Gypsy-72_PM-I	2	83382	97.4589742391		Motif:Merlin-N1_HSal	2	80598	96.5372683827		Motif:SUKKULA2_HV-LTR	2	53356	96.1352047711		Motif:ISL2EU-11_CGi	1	30913	98.1365079365
					Motif:Gypsy70-I_AG	2	83384	97.4613118893		Motif:MER34C_EC	2	80600	96.5396639078		Motif:STREPE_PF	2	53358	96.1388083098		Motif:IS4EU-1_DR	1	30914	98.1396825397
					Motif:Gypsy-70_BG-I	2	83386	97.4636495395		Motif:MdoLTR3-int	2	80602	96.542059433		Motif:SSU-rRNA_Dme	2	53360	96.1424118484		Motif:IS4EU-1_AA	1	30915	98.1428571429
					Motif:Gypsy6-SM_I-int	2	83388	97.4659871897		Motif:MDG1_I-int	2	80604	96.5444549581		Motif:Sola3-1N1_AA	2	53362	96.1460153871		Motif:IS3EU-2_DR	1	30916	98.146031746
					Motif:Gypsy-6_PPa-LTR	2	83390	97.4683248399		Motif:Mariner-N5_HSal	2	80606	96.5468504833		Motif:Sola3-1_DPu	2	53364	96.1496189258		Motif:INV2j_DB	1	30917	98.1492063492
					Motif:Gypsy65-ZM_I-int	2	83392	97.4706624901		Motif:Mariner-N5B_DR	2	80608	96.5492460085		Motif:Sola2-2_HM	2	53366	96.1532224645		Motif:HUERS-P1-int	1	30918	98.1523809524
					Motif:Gypsy65-I_DR	2	83394	97.4730001403		Motif:Mariner-N39_HSal	2	80610	96.5516415336		Motif:Sola2-1_NV	2	53368	96.1568260031		Motif:HSAT6	1	30919	98.1555555556
					Motif:Gypsy63-I_AG	2	83396	97.4753377905		Motif:Mariner-N1C_ACar	2	80612	96.5540370588		Motif:Sola2-1_AAe	2	53370	96.1604295418		Motif:Hopscotch_I-int	1	30920	98.1587301587
					Motif:Gypsy-62_DWil-LTR	2	83398	97.4776754406		Motif:Mariner-9_DK	2	80614	96.5564325839		Motif:Sola1-1_Smoe	2	53372	96.1640330805		Motif:Homo9	1	30921	98.1619047619
					Motif:Gypsy61-I_DR	2	83400	97.4800130908		Motif:Mariner-79B_HSal	2	80616	96.5588281091		Motif:Sola1-1_FraCyl	2	53374	96.1676366192		Motif:Hoana8	1	30922	98.1650793651
					Motif:Gypsy-616_AA-I	2	83402	97.482350741		Motif:Mariner-77_HSal	2	80618	96.5612236343		Motif:SINEC_Fc	2	53376	96.1712401578		Motif:Hoana5	1	30923	98.1682539683
					Motif:Gypsy-5_BD-I	2	83404	97.4846883912		Motif:Mariner-59N1_HSal	2	80620	96.5636191594		Motif:SINEC_c1	2	53378	96.1748436965		Motif:HeT-A2_DVi	1	30924	98.1714285714
					Motif:Gypsy58-I_AG	2	83406	97.4870260414		Motif:Mariner2N1_AO	2	80622	96.5660146846		Motif:SFV1-4_AMi-I	2	53380	96.1784472352		Motif:HERVIP10FH-int	1	30925	98.1746031746
					Motif:Gypsy-58_CQ-I	2	83408	97.4893636916		Motif:Mariner-23_SIn	2	80624	96.5684102097		Motif:SAT-12_DR	2	53382	96.1820507739		Motif:HERV-Fc2-int	1	30926	98.1777777778
					Motif:Gypsy55-I_DR	2	83410	97.4917013418		Motif:Mariner-1_PGr	2	80626	96.5708057349		Motif:Sagan-7_MLP	2	53384	96.1856543125		Motif:HelitronY2	1	30927	98.180952381
					Motif:Gypsy55-I_AG	2	83412	97.494038992		Motif:Mariner-19_HM	2	80628	96.57320126		Motif:Sagan-6_TMe	2	53386	96.1892578512		Motif:HelitronY1B	1	30928	98.1841269841
					Motif:Gypsy-52_Mad-I	2	83414	97.4963766422		Motif:Mariner-18_HSal	2	80630	96.5755967852		Motif:Sagan-3_MLP	2	53388	96.1928613899		Motif:Helitron-N34_CGi	1	30929	98.1873015873
					Motif:Gypsy-51_GA-LTR	2	83416	97.4987142924		Motif:Mariner-17_LCh	2	80632	96.5779923104		Motif:Sagan-1N1_RO	2	53390	96.1964649286		Motif:Helitron-4_ZM	1	30930	98.1904761905
					Motif:Gypsy-4_PBa-I	2	83418	97.5010519426		Motif:Mariner-14_SIn	2	80634	96.5803878355		Motif:RTEX-3_SK	2	53392	96.2000684672		Motif:Helitron-3_PM	1	30931	98.1936507937
					Motif:Gypsy-4_LH-I	2	83420	97.5033895928		Motif:MARINER-12_SM	2	80636	96.5827833607		Motif:RTEX-17_SK	2	53394	96.2036720059		Motif:Helitron-3_CGi	1	30932	98.1968253968
					Motif:Gypsy49-I_DR	2	83422	97.505727243		Motif:LTRX1-LTR_XT	2	80638	96.5851788858		Motif:RTEX-16_CGi	2	53396	96.2072755446		Motif:Helitron2_OS	1	30933	98.2
					Motif:Gypsy-47_MLP-I	2	83424	97.5080648932		Motif:LTR47_Ami	2	80640	96.587574411		Motif:RTEX-15_SK	2	53398	96.2108790833		Motif:Helitron-2_Mad	1	30934	98.2031746032
					Motif:Gypsy-45_PM-LTR	2	83426	97.5104025434		Motif:LTR2C	2	80642	96.5899699362		Motif:RTE-10B_CPB	2	53400	96.2144826219		Motif:Helitron-1_DVir	1	30935	98.2063492063
					Motif:Gypsy-43_PAb-I	2	83428	97.5127401936		Motif:LTR28_ET	2	80644	96.5923654613		Motif:RLG_scMaximus_4_1-I	2	53402	96.2180861606		Motif:Helitron-1_DPe	1	30936	98.2095238095
					Motif:Gypsy-41_Mad-I	2	83430	97.5150778438		Motif:LTR-14_Crp	2	80646	96.5947609865		Motif:RLG_scMaximus_2_3-I	2	53404	96.2216896993		Motif:hATw-1_SP	1	30937	98.2126984127
					Motif:Gypsy-40_STu-I	2	83432	97.5174154939		Motif:LOOPERN2_DR	2	80648	96.5971565116		Motif:REX3_XM	2	53406	96.225293238		Motif:hATw-1_HM	1	30938	98.2158730159
					Motif:Gypsy-3_HMM-I	2	83434	97.5197531441		Motif:LONGPAL2	2	80650	96.5995520368		Motif:Rehavkus-1_DA	2	53408	96.2288967766		Motif:hAT-N91_DR	1	30939	98.219047619
					Motif:Gypsy-3_BG-I	2	83436	97.5220907943		Motif:LOA-8_AAe	2	80652	96.601947562		Motif:R7Ag2	2	53410	96.2325003153		Motif:hAT-N7_ACar	1	30940	98.2222222222
					Motif:Gypsy-36_ST-LTR	2	83438	97.5244284445		Motif:LINEX-2_DR	2	80654	96.6043430871		Motif:Proto2-5_CS1	2	53412	96.236103854		Motif:hAT-N75_DR	1	30941	98.2253968254
					Motif:Gypsy-34_ST-I	2	83440	97.5267660947		Motif:LINE-3	2	80656	96.6067386123		Motif:Poseidon-N5_PM	2	53414	96.2397073927		Motif:hAT-N74_DR	1	30942	98.2285714286
					Motif:Gypsy-34_NVi-I	2	83442	97.5291037449		Motif:LINE2H_CE	2	80658	96.6091341374		Motif:Polinton-N1B_NV	2	53416	96.2433109313		Motif:hAT-N73_DR	1	30943	98.2317460317
					Motif:Gypsy-32_PAb-LTR	2	83444	97.5314413951		Motif:LINE2B_CB	2	80660	96.6115296626		Motif:Polinton-5_NV	2	53418	96.24691447		Motif:hAT-N71_DR	1	30944	98.2349206349
					Motif:Gypsy-32_DWil-LTR	2	83446	97.5337790453		Motif:LINE1-5_SBi	2	80662	96.6139251877		Motif:Polinton-1_GI	2	53420	96.2505180087		Motif:hAT-N5_ASi	1	30945	98.2380952381
					Motif:Gypsy-32_ADe-I	2	83448	97.5361166955		Motif:LINE1-14_SBi	2	80664	96.6163207129		Motif:Polinton-1_DEu	2	53422	96.2541215474		Motif:hAT-N47_DR	1	30946	98.2412698413
					Motif:Gypsy-32_AA-I	2	83450	97.5384543457		Motif:LINE1-13_ZM	2	80666	96.6187162381		Motif:Polinton-1_DAn	2	53424	96.257725086		Motif:hAT-N2_ALy	1	30947	98.2444444444
					Motif:Gypsy-31_DEl-I	2	83452	97.5407919959		Motif:LINE1-12_SBi	2	80668	96.6211117632		Motif:piggyBac-5_CGi	2	53426	96.2613286247		Motif:hAT-N20_DR	1	30948	98.2476190476
					Motif:Gypsy-30_DAn-I	2	83454	97.5431296461		Motif:LIN6_SM	2	80670	96.6235072884		Motif:PGGYPSYX1	2	53428	96.2649321634		Motif:hATm-50_HM	1	30949	98.2507936508
					Motif:Gypsy2-PTR_I-int	2	83456	97.5454672963		Motif:LDT1	2	80672	96.6259028135		Motif:Penelope-3_NV	2	53430	96.2685357021		Motif:hATm-16_HM	1	30950	98.253968254
					Motif:Gypsy-2_PMar-I	2	83458	97.5478049465		Motif:LatiHarb1-N1	2	80674	96.6282983387		Motif:Penelope1A_XT	2	53432	96.2721392407		Motif:hATm-11_HM	1	30951	98.2571428571
					Motif:Gypsy-2-I_LG	2	83460	97.5501425967		Motif:L2_AC_10	2	80676	96.6306938639		Motif:P-2_PBa	2	53434	96.2757427794		Motif:hAT-83_HMa	1	30952	98.2603174603
					Motif:Gypsy2-I_AG	2	83462	97.5524802469		Motif:L2-8_DR	2	80678	96.633089389		Motif:Outcast	2	53436	96.2793463181		Motif:hAT-7_CPB	1	30953	98.2634920635
					Motif:Gypsy-27_XT-I	2	83464	97.554817897		Motif:L2-4_NVi	2	80680	96.6354849142		Motif:ORTE-4_AAe	2	53438	96.2829498568		Motif:hAT-67_HM	1	30954	98.2666666667
					Motif:Gypsy-27_OD-I	2	83466	97.5571555472		Motif:L2-3b_Cis	2	80682	96.6378804393		Motif:Ogre-MT4_LTR	2	53440	96.2865533954		Motif:hAT6-1_NV	1	30955	98.2698412698
					Motif:Gypsy-27_DP-I	2	83468	97.5594931974		Motif:L2-1c_Cis	2	80684	96.6402759645		Motif:Ogre-LE1_I-int	2	53442	96.2901569341		Motif:hAT-50_HM	1	30956	98.273015873
					Motif:Gypsy-26-I_NVi	2	83470	97.5618308476		Motif:L2-13a_Lch	2	80686	96.6426714897		Motif:NAVIRTE1	2	53444	96.2937604728		Motif:hAT-4_XT	1	30957	98.2761904762
					Motif:Gypsy26-I_AG	2	83472	97.5641684978		Motif:L2-12a_Lch	2	80688	96.6450670148		Motif:MuSHAN_MT	2	53446	96.2973640115		Motif:hAT-4_VC	1	30958	98.2793650794
					Motif:Gypsy-25-LTR_DR	2	83474	97.566506148		Motif:L1_Cis99Sat	2	80690	96.64746254		Motif:MULE-1_CapOwc	2	53448	96.3009675501		Motif:hAT4_SB	1	30959	98.2825396825
					Motif:Gypsy-25_LBS-I	2	83476	97.5688437982		Motif:L1_AC_16	2	80692	96.6498580651		Motif:MuDR-1_DF	2	53450	96.3045710888		Motif:HAT-4N3_Mad	1	30960	98.2857142857
					Motif:Gypsy-25_DYa-I	2	83478	97.5711814484		Motif:L1-95_DR	2	80694	96.6522535903		Motif:MonoRep1774	2	53452	96.3081746275		Motif:HAT-4N1_Mad	1	30961	98.2888888889
					Motif:Gypsy-25_DPu-I	2	83480	97.5735190986		Motif:L1-8_Cis	2	80696	96.6546491155		Motif:MINISAT4_CB	2	53454	96.3117781662		Motif:HAT-4_Mad	1	30962	98.2920634921
					Motif:Gypsy-24_XT-I	2	83482	97.5758567488		Motif:L1-58_XT	2	80698	96.6570446406		Motif:MERMITE18B	2	53456	96.3153817048		Motif:hAT-43_Lch	1	30963	98.2952380952
					Motif:Gypsy24-I_Dpse	2	83484	97.578194399		Motif:L1-55_XT	2	80700	96.6594401658		Motif:MAX_I-int	2	53458	96.3189852435		Motif:hAT-3_RC	1	30964	98.2984126984
					Motif:Gypsy-24_FV-I	2	83486	97.5805320492		Motif:L1-4_NV	2	80702	96.6618356909		Motif:Mariner-5_PGr	2	53460	96.3225887822		Motif:hAT-3_LCh	1	30965	98.3015873016
					Motif:Gypsy-24_DY-I	2	83488	97.5828696994		Motif:L1-3_VC	2	80704	96.6642312161		Motif:Mariner-4_ADi	2	53462	96.3261923209		Motif:hAT-35_LCh	1	30966	98.3047619048
					Motif:Gypsy-23_PSo-I	2	83490	97.5852073496		Motif:L1-3_Tbel	2	80706	96.6666267412		Motif:Mariner-29_AEc	2	53464	96.3297958595		Motif:hAT-33_HM	1	30967	98.3079365079
					Motif:Gypsy-23_PAb-I	2	83492	97.5875449998		Motif:L1-3_Opr	2	80708	96.6690222664		Motif:Mariner-17_HM	2	53466	96.3333993982		Motif:hAT-310_Ami	1	30968	98.3111111111
					Motif:Gypsy-21_PBa-I	2	83494	97.58988265		Motif:L1-3_NV	2	80710	96.6714177916		Motif:Mariner-16_SIn	2	53468	96.3370029369		Motif:hAT-30_LMi	1	30969	98.3142857143
					Motif:Gypsy-21-I_NV	2	83496	97.5922203002		Motif:L1-3_CR	2	80712	96.6738133167		Motif:Mariner-14_PI	2	53470	96.3406064756		Motif:hAT-2_HM	1	30970	98.3174603175
					Motif:Gypsy21-I_AG	2	83498	97.5945579503		Motif:L1-2_EE	2	80714	96.6762088419		Motif:Mariner-13_SIn	2	53472	96.3442100142		Motif:hAT-2_GM	1	30971	98.3206349206
					Motif:Gypsy-20_PSo-I	2	83500	97.5968956005		Motif:L1-2_Cis	2	80716	96.678604367		Motif:Mariner-101_HSal	2	53474	96.3478135529		Motif:hAT-2_DSe	1	30972	98.3238095238
					Motif:Gypsy-20_DWil-I	2	83502	97.5992332507		Motif:L1-24C_ACar	2	80718	96.6809998922		Motif:MamSINE1	2	53476	96.3514170916		Motif:HAT2_CI	1	30973	98.326984127
					Motif:Gypsy-206_DR-I	2	83504	97.6015709009		Motif:L1-23_DR	2	80720	96.6833954174		Motif:LTRX1-LTR_XT	2	53478	96.3550206303		Motif:hAT-24_DR	1	30974	98.3301587302
					Motif:Gypsy-203_AA-LTR	2	83506	97.6039085511		Motif:L1-21B_ACar	2	80722	96.6857909425		Motif:LTR-6C_Crp	2	53480	96.3586241689		Motif:hAT-23_HM	1	30975	98.3333333333
					Motif:Gypsy1-SM_LTR	2	83508	97.6062462013		Motif:L1-1_Mpr	2	80724	96.6881864677		Motif:LTR53C_MD	2	53482	96.3622277076		Motif:hAT-22_HM	1	30976	98.3365079365
					Motif:Gypsy-1_SK-I	2	83510	97.6085838515		Motif:Kolobok-8_LMi	2	80726	96.6905819928		Motif:LTR-36_Crp	2	53484	96.3658312463		Motif:hAT-22_CPB	1	30977	98.3396825397
					Motif:Gypsy-1_PD-I	2	83512	97.6109215017		Motif:Kolobok-7_CGi	2	80728	96.692977518		Motif:LTR18C_BT	2	53486	96.369434785		Motif:hAT-21_CPB	1	30978	98.3428571429
					Motif:Gypsy-1_LH-I	2	83514	97.6132591519		Motif:Kolobok-2_CGi	2	80730	96.6953730432		Motif:LTR15_FC	2	53488	96.3730383236		Motif:hAT-20_Mad	1	30979	98.346031746
					Motif:Gypsy-1_Cop-I	2	83516	97.6155968021		Motif:Kolobok-1_NV	2	80732	96.6977685683		Motif:LTR-12B_Crp	2	53490	96.3766418623		Motif:hAT-1_PBa	1	30980	98.3492063492
					Motif:Gypsy-1_AMi-I	2	83518	97.6179344523		Motif:Kolobok-1_NaeGru	2	80734	96.7001640935		Motif:LTR127_MD	2	53492	96.380245401		Motif:hAT-1_DT	1	30981	98.3523809524
					Motif:Gypsy19-I_Dpse	2	83520	97.6202721025		Motif:Kolobok-1_LCh	2	80736	96.7025596186		Motif:LSU-rRNA_Ldo	2	53494	96.3838489397		Motif:hAT-18_ZM	1	30982	98.3555555556
					Motif:Gypsy-19_GA-LTR	2	83522	97.6226097527		Motif:Kiri-38_AAe	2	80738	96.7049551438		Motif:LSU-rRNA_Ddi	2	53496	96.3874524783		Motif:hAT-15_CPB	1	30983	98.3587301587
					Motif:Gypsy-199_ZM-I	2	83524	97.6249474029		Motif:Kiri-32_AAe	2	80740	96.707350669		Motif:LONGPAL3	2	53498	96.391056017		Motif:hAT-11_SBi	1	30984	98.3619047619
					Motif:Gypsy18-I_Dpse	2	83526	97.6272850531		Motif:KibiDr1	2	80742	96.7097461941		Motif:LOA_Ele6C_AAe	2	53500	96.3946595557		Motif:HarbingerS-8_PI	1	30985	98.3650793651
					Motif:Gypsy-18_GA-I	2	83528	97.6296227033		Motif:Jockey-2_DVi	2	80744	96.7121417193		Motif:LOA-8_AAe	2	53502	96.3982630944		Motif:HarbingerS-2_PSo	1	30986	98.3682539683
					Motif:Gypsy-188_DR-LTR	2	83530	97.6319603535		Motif:Jockey-1_DAn	2	80746	96.7145372444		Motif:LINE1-43_ZM	2	53504	96.401866633		Motif:Harbinger-N2_SP	1	30987	98.3714285714
					Motif:Gypsy-17-I_DR	2	83532	97.6342980036		Motif:Jockey-12_AAe	2	80748	96.7169327696		Motif:LINE1-3_SBi	2	53506	96.4054701717		Motif:Harbinger-5_DR	1	30988	98.3746031746
					Motif:Gypsy17-I_AG	2	83534	97.6366356538		Motif:ISL2EU-7_CGi	2	80750	96.7193282947		Motif:LatiHarb1-N3B	2	53508	96.4090737104		Motif:Harbinger-5_CGi	1	30989	98.3777777778
					Motif:Gypsy-17_DPu-I	2	83536	97.638973304		Motif:ISL2EU-3_CFl	2	80752	96.7217238199		Motif:LatiHarb1-N3A	2	53510	96.4126772491		Motif:Harbinger-4_CGi	1	30990	98.380952381
					Motif:Gypsy-176_AA-I	2	83538	97.6413109542		Motif:ISL2EU-1_HM	2	80754	96.7241193451		Motif:LatiHarb1-N1	2	53512	96.4162807877		Motif:Harbinger2_DR	1	30991	98.3841269841
					Motif:Gypsy-16_SMo-LTR	2	83540	97.6436486044		Motif:ISL2EU-16_CGi	2	80756	96.7265148702		Motif:L2_AC_10	2	53514	96.4198843264		Motif:Harbinger-1_GA	1	30992	98.3873015873
					Motif:Gypsy-16_DRh-I	2	83542	97.6459862546		Motif:ISL2EU-10_CGi	2	80758	96.7289103954		Motif:L2_AC_1	2	53516	96.4234878651		Motif:Harbinger-1_CPa	1	30993	98.3904761905
					Motif:Gypsy-16_DPu-I	2	83544	97.6483239048		Motif:ISEAG1	2	80760	96.7313059205		Motif:L2-22_ACar	2	53518	96.4270914038		Motif:HARB-4N1_Mad	1	30994	98.3936507937
					Motif:Gypsy-169_AA-I	2	83546	97.650661555		Motif:IS4EU-1_NV	2	80762	96.7337014457		Motif:L1-N6_CQ	2	53520	96.4306949424		Motif:HARB-14_SBi	1	30995	98.3968253968
					Motif:Gypsy-15_LBS-I	2	83548	97.6529992052		Motif:Invader3_I-int	2	80764	96.7360969709		Motif:L1_Mdo4	2	53522	96.4342984811		Motif:HARB-12_FV	1	30996	98.4
					Motif:Gypsy15-I_Dya	2	83550	97.6553368554		Motif:INGA_HV_I-int	2	80766	96.738492496		Motif:L1MC4	2	53524	96.4379020198		Motif:HAL1-4C_Cpo	1	30997	98.4031746032
					Motif:Gypsy-154_AA-I	2	83552	97.6576745056		Motif:INAV_HV-int	2	80768	96.7408880212		Motif:L1_Cis99Sat	2	53526	96.4415055585		Motif:HAL1-3_Cho	1	30998	98.4063492063
					Motif:Gypsy152-I_DR	2	83554	97.6600121558		Motif:I_Ele4E_AAe	2	80770	96.7432835463		Motif:L1A_Oc	2	53528	96.4451090971		Motif:Gypsy-9-I_CR	1	30999	98.4095238095
					Motif:Gypsy-14-I_DR	2	83556	97.662349806		Motif:I_Ele4C_AAe	2	80772	96.7456790715		Motif:L1_AC_3B	2	53530	96.4487126358		Motif:Gypsy-99_GM-I	1	31000	98.4126984127
					Motif:Gypsy-14_CFl-I	2	83558	97.6646874562		Motif:IAPLTR2a2_Mm	2	80774	96.7480745967		Motif:L1-9_GM	2	53532	96.4523161745		Motif:Gypsy95-I_DR	1	31001	98.4158730159
					Motif:Gypsy-14_BD-I	2	83560	97.6670251064		Motif:IAPEY3-int	2	80776	96.7504701218		Motif:L1-95_ACar	2	53534	96.4559197132		Motif:Gypsy-93_ZM-I	1	31002	98.419047619
					Motif:Gypsy-141_AA-I	2	83562	97.6693627566		Motif:I-52_AAe	2	80778	96.752865647		Motif:L1-87_ACar	2	53536	96.4595232518		Motif:Gypsy-90_CQ-I	1	31003	98.4222222222
					Motif:Gypsy-13_SMo-LTR	2	83564	97.6717004068		Motif:I-2_DEu	2	80780	96.7552611721		Motif:L1-74_ACar	2	53538	96.4631267905		Motif:Gypsy-8_ST-I	1	31004	98.4253968254
					Motif:Gypsy-12_LBS-I	2	83566	97.6740380569		Motif:I-2_AC	2	80782	96.7576566973		Motif:L1-67_ACar	2	53540	96.4667303292		Motif:Gypsy-8_LBS-I	1	31005	98.4285714286
					Motif:Gypsy-125_MLP-I	2	83568	97.6763757071		Motif:I-1_DR	2	80784	96.7600522224		Motif:L1-3_Tbel	2	53542	96.4703338679		Motif:Gypsy-8-I_NV	1	31006	98.4317460317
					Motif:Gypsy-124N_SBi-LTR	2	83570	97.6787133573		Motif:I-1_DP	2	80786	96.7624477476		Motif:L1-3_CR	2	53544	96.4739374065		Motif:Gypsy8-I_Dpse	1	31007	98.4349206349
					Motif:Gypsy-122_MLP-I	2	83572	97.6810510075		Motif:HERVS71-int	2	80788	96.7648432728		Motif:L1-33_ACar	2	53546	96.4775409452		Motif:Gypsy-8_BG-I	1	31008	98.4380952381
					Motif:Gypsy-11_MLP-I	2	83574	97.6833886577		Motif:HelitronY1B	2	80790	96.7672387979		Motif:L1-2_VC	2	53548	96.4811444839		Motif:Gypsy-88_CQ-I	1	31009	98.4412698413
					Motif:Gypsy-116-LTR_DR	2	83576	97.6857263079		Motif:Helitron-N8_NV	2	80792	96.7696343231		Motif:L1-2_FR	2	53550	96.4847480226		Motif:Gypsy-84_CGi-I	1	31010	98.4444444444
					Motif:Gypsy-10_DPer-I	2	83578	97.6880639581		Motif:Helitron-N3_PBa	2	80794	96.7720298482		Motif:L1-21_ACar	2	53552	96.4883515612		Motif:Gypsy-81_SB-I	1	31011	98.4476190476
					Motif:GYPSIA_I-int	2	83580	97.6904016083		Motif:Helitron-N3_DR	2	80796	96.7744253734		Motif:L1-1_DR	2	53554	96.4919550999		Motif:Gypsy-80_PAb-I	1	31012	98.4507936508
					Motif:GmGYPSY10_I-int	2	83582	97.6927392585		Motif:Helitron-N12_CGi	2	80798	96.7768208986		Motif:Kolobok-1_SKow	2	53556	96.4955586386		Motif:Gypsy-80-I_ZM	1	31013	98.453968254
					Motif:GLT2_SM	2	83584	97.6950769087		Motif:Helitron-4N1_SMo	2	80800	96.7792164237		Motif:Kiri-6_AAe	2	53558	96.4991621773		Motif:Gypsy80-I_DR	1	31014	98.4571428571
					Motif:Ginger2-1_NV	2	83586	97.6974145589		Motif:Helitron4	2	80802	96.7816119489		Motif:Kiri-1_AAe	2	53560	96.5027657159		Motif:Gypsy-80_CGi-LTR	1	31015	98.4603174603
					Motif:Ginger1-1_BF	2	83588	97.6997522091		Motif:Helitron-3N1_NVi	2	80804	96.784007474		Motif:Kiri-10_AAe	2	53562	96.5063692546		Motif:Gypsy-7_RP-I	1	31016	98.4634920635
					Motif:ES22	2	83590	97.7020898593		Motif:Helitron-2_SMo	2	80806	96.7864029992		Motif:Jockey-13_DAn	2	53564	96.5099727933		Motif:Gypsy-7N_PPa-LTR	1	31017	98.4666666667
					Motif:ERV6_MD_I-int	2	83592	97.7044275095		Motif:Helitron2_PPa	2	80808	96.7887985244		Motif:ISL2EU-4_CFl	2	53566	96.513576332		Motif:Gypsy-7_DFi-I	1	31018	98.4698412698
					Motif:ERV-4_Crp-I	2	83594	97.7067651597		Motif:Helitron2	2	80810	96.7911940495		Motif:IS4EU-1_DR	2	53568	96.5171798706		Motif:Gypsy-79_PTr-LTR	1	31019	98.473015873
					Motif:ERV1-N1-I_XT	2	83596	97.7091028099		Motif:HELENA	2	80812	96.7935895747		Motif:IAPLTR2a2_Mm	2	53570	96.5207834093		Motif:Gypsy-74_CGi-I	1	31020	98.4761904762
					Motif:ERV1-4_ACar-I	2	83598	97.71144046		Motif:HAT-N9_Mad	2	80814	96.7959850998		Motif:I-4_DBi	2	53572	96.524386948		Motif:Gypsy-73_PAb-LTR	1	31021	98.4793650794
					Motif:EnSpm-N5_DR	2	83600	97.7137781102		Motif:hAT-N7_ACar	2	80816	96.798380625		Motif:I-4_AC	2	53574	96.5279904867		Motif:Gypsy-6_SMo-I	1	31022	98.4825396825
					Motif:EnSpm-N4_SBi	2	83602	97.7161157604		Motif:hAT-N71_DR	2	80818	96.8007761502		Motif:I-1_DWi	2	53576	96.5315940253		Motif:Gypsy-69_PAb-I	1	31023	98.4857142857
					Motif:EnSpm-N1_HV	2	83604	97.7184534106		Motif:HATN5_ALy	2	80820	96.8031716753		Motif:Hoana5	2	53578	96.535197564		Motif:Gypsy67-ZM_I-int	1	31024	98.4888888889
					Motif:EnSpm-7_STu	2	83606	97.7207910608		Motif:HATN3_ALy	2	80822	96.8055672005		Motif:HelitronY1D	2	53580	96.5388011027		Motif:Gypsy-67_MLP-I	1	31025	98.4920634921
					Motif:EnSpm7_SB	2	83608	97.723128711		Motif:hAT-N2A_XT	2	80824	96.8079627256		Motif:Helitron-N3_PBa	2	53582	96.5424046414		Motif:Gypsy-66_PAb-I	1	31026	98.4952380952
					Motif:EnSpm-6_FV	2	83610	97.7254663612		Motif:hAT-N14_SBi	2	80826	96.8103582508		Motif:Helitron-N2_DT	2	53584	96.54600818		Motif:Gypsy-66-I_NV	1	31027	98.4984126984
					Motif:EnSpm4_SB	2	83612	97.7278040114		Motif:hAT-N145_DR	2	80828	96.8127537759		Motif:Helitron-N2_DBp	2	53586	96.5496117187		Motif:Gypsy-63_CQ-I	1	31028	98.5015873016
					Motif:EnSpm-40_SBi	2	83614	97.7301416616		Motif:hAT-N12_SBi	2	80830	96.8151493011		Motif:Helitron-N25_CGi	2	53588	96.5532152574		Motif:Gypsy-609_AA-I	1	31029	98.5047619048
					Motif:EnSpm-2_TM	2	83616	97.7324793118		Motif:hAT-N12_AMi	2	80832	96.8175448263		Motif:Helitron-N1_PTr	2	53590	96.5568187961		Motif:Gypsy5-VV_I-int	1	31030	98.5079365079
					Motif:EnSpm-2_TA	2	83618	97.734816962		Motif:hATm-54_HM	2	80834	96.8199403514		Motif:HELITRON7_CB	2	53592	96.5604223347		Motif:Gypsy-5_RO-I	1	31031	98.5111111111
					Motif:EnSpm1_TM	2	83620	97.7371546122		Motif:hATm-51_HM	2	80836	96.8223358766		Motif:Helitron-5_ZM	2	53594	96.5640258734		Motif:Gypsy-5-I_HM	1	31032	98.5142857143
					Motif:EnSpm-1_Mad	2	83622	97.7394922624		Motif:hATm-40_HM	2	80838	96.8247314017		Motif:Helitron-5_CGi	2	53596	96.5676294121		Motif:Gypsy-5_DWil-LTR	1	31033	98.5174603175
					Motif:EnSpm-1_DDi	2	83624	97.7418299126		Motif:hAT-9_HM	2	80840	96.8271269269		Motif:Helitron-4_SMo	2	53598	96.5712329508		Motif:Gypsy-5_Deu-I	1	31034	98.5206349206
					Motif:EnSpm-13_ZM	2	83626	97.7441675628		Motif:hAT-6_VV	2	80842	96.8295224521		Motif:Helitron-3_ZM	2	53600	96.5748364894		Motif:Gypsy-5_DBp-I	1	31035	98.5238095238
					Motif:DNA9-1_STu	2	83628	97.746505213		Motif:hAT-69_HM	2	80844	96.8319179772		Motif:Helitron-3N2_PM	2	53602	96.5784400281		Motif:Gypsy58-I_DR	1	31036	98.526984127
					Motif:DNA9-14_Mad	2	83630	97.7488428632		Motif:hAT-66_HM	2	80846	96.8343135024		Motif:Helitron2_PPa	2	53604	96.5820435668		Motif:Gypsy58-I_AG	1	31037	98.5301587302
					Motif:DNA8-6_Mad	2	83632	97.7511805133		Motif:hAT-57_HM	2	80848	96.8367090275		Motif:Helitron-2_Crp	2	53606	96.5856471055		Motif:Gypsy-58_CGi-I	1	31038	98.5333333333
[truncated: 2,335 more rows]
