# Supplementary material for: Dynamics of genomic innovation in the unicellular ancestry of animals
Source: eLife journal article supplement (doi:10.7554/elife.26036), 2017-07-20
Supplement: supp [file elife-26036-supp-v1.zip › elife_poa_e26036_Figure_3_Source_Data_14.odt]

## Sheet: 100% TE families
# species	TEfam	present in Metazoa	Present in unicellular Holozoa	Present in Both	colorets
21	Ag-Jock-1	TRUE	TRUE	TRUE	#35978f
21	ATCopia24I	TRUE	TRUE	TRUE	#35978f
21	CACTA_LP	TRUE	TRUE	TRUE	#35978f
21	CryptonV-2_DR	TRUE	TRUE	TRUE	#35978f
21	EnSpm-5_HM	TRUE	TRUE	TRUE	#35978f
21	ENSPM-6_DR	TRUE	TRUE	TRUE	#35978f
21	Ginger1-1_AC	TRUE	TRUE	TRUE	#35978f
21	HAT1_DR	TRUE	TRUE	TRUE	#35978f
21	Polinton-9_NVi	TRUE	TRUE	TRUE	#35978f
21	RTAg4	TRUE	TRUE	TRUE	#35978f
21	TART_DV	TRUE	TRUE	TRUE	#35978f
20	Dada-1_BF	TRUE	TRUE	TRUE	#35978f
20	Dada-tL_DR	TRUE	TRUE	TRUE	#35978f
20	DIRS-4_DR	TRUE	TRUE	TRUE	#35978f
20	DNA6-6_DR	TRUE	TRUE	TRUE	#35978f
20	DNA-8-3_HM	TRUE	TRUE	TRUE	#35978f
20	DNA9-3_DR	TRUE	TRUE	TRUE	#35978f
20	DNA-TA-4_DR	TRUE	TRUE	TRUE	#35978f
20	EnSpm1_SB	TRUE	TRUE	TRUE	#35978f
20	hAT-4_PBa	TRUE	TRUE	TRUE	#35978f
20	hAT-N144_DR	TRUE	TRUE	TRUE	#35978f
20	hAT-N4_ALy	TRUE	TRUE	TRUE	#35978f
20	Helitron-2_DR	TRUE	TRUE	TRUE	#35978f
20	IS3EU-1_DR	TRUE	TRUE	TRUE	#35978f
20	Jockey-3_DGri	TRUE	TRUE	TRUE	#35978f
20	Kolobok-3_Aplcal	TRUE	TRUE	TRUE	#35978f
20	L1-11_DR	TRUE	TRUE	TRUE	#35978f
20	Polinton-1_DR	TRUE	TRUE	TRUE	#35978f
20	Polinton-2A_NV	TRUE	TRUE	TRUE	#35978f
20	Polinton-5_NVi	TRUE	TRUE	TRUE	#35978f
20	Polinton-8_NVi	TRUE	TRUE	TRUE	#35978f
20	RT1	TRUE	TRUE	TRUE	#35978f
20	TE-X-5_DR	TRUE	TRUE	TRUE	#35978f
20	Tx1-1_CGi	TRUE	TRUE	TRUE	#35978f
19	Copia-1-I_HS	TRUE	TRUE	TRUE	#35978f
19	Copia-1_ST-LTR	TRUE	TRUE	TRUE	#35978f
19	Copia-58_BG-I	TRUE	TRUE	TRUE	#35978f
19	DIRS-8B_DR	TRUE	TRUE	TRUE	#35978f
19	DIRS-8_DR	TRUE	TRUE	TRUE	#35978f
19	DNA2-5_DR	TRUE	TRUE	TRUE	#35978f
19	DNA8-5_DR	TRUE	TRUE	TRUE	#35978f
19	EnSpm-17_HM	TRUE	TRUE	TRUE	#35978f
19	EnSpm-7_DR	TRUE	TRUE	TRUE	#35978f
19	EnSpm-N13_DR	TRUE	TRUE	TRUE	#35978f
19	Ginger1-N1_DR	TRUE	TRUE	TRUE	#35978f
19	Gypsy-1_AC-I	TRUE	TRUE	TRUE	#35978f
19	Gypsy-35_CGi-I	TRUE	TRUE	TRUE	#35978f
19	Gypsy61-I_AG	TRUE	TRUE	TRUE	#35978f
19	Gypsy68-I_AG	TRUE	TRUE	TRUE	#35978f
19	Gypsy98-LTR_Dr	TRUE	TRUE	TRUE	#35978f
19	hAT-2_HM	TRUE	TRUE	TRUE	#35978f
19	hAT-N53_DR	TRUE	TRUE	TRUE	#35978f
19	IMPB_01	TRUE	TRUE	TRUE	#35978f
19	IS3EU-4_DR	TRUE	TRUE	TRUE	#35978f
19	Novosib-6_CR	TRUE	TRUE	TRUE	#35978f
19	Polinton-1_PBa	TRUE	TRUE	TRUE	#35978f
19	Polinton-2_HM	TRUE	TRUE	TRUE	#35978f
19	Sat-1_CPa	TRUE	TRUE	TRUE	#35978f
19	Sola3-1_BF	TRUE	TRUE	TRUE	#35978f
18	BEL1-I_SM	TRUE	TRUE	TRUE	#35978f
18	Dada-U6_SS	TRUE	TRUE	TRUE	#35978f
18	Daphne-18_HM	TRUE	TRUE	TRUE	#35978f
18	DNA2-7_CGi	TRUE	TRUE	TRUE	#35978f
18	DNA3-1_CGi	TRUE	TRUE	TRUE	#35978f
18	DNA7-N1_DR	TRUE	TRUE	TRUE	#35978f
18	DNA8-10_CGi	TRUE	TRUE	TRUE	#35978f
18	ERV1-7_DR-I	TRUE	TRUE	TRUE	#35978f
18	Ginger1-2_DR	TRUE	TRUE	TRUE	#35978f
18	Gypsy-14_DAn-I	TRUE	TRUE	TRUE	#35978f
18	Gypsy-19_SB-I	TRUE	TRUE	TRUE	#35978f
18	Gypsy-80-I_ZM	TRUE	TRUE	TRUE	#35978f
18	Gypsy8-I_Dpse	TRUE	TRUE	TRUE	#35978f
18	Jockey-6_DK	TRUE	TRUE	TRUE	#35978f
18	Kolobok-N1_AEc	TRUE	TRUE	TRUE	#35978f
18	L1-4_VC	TRUE	TRUE	TRUE	#35978f
18	Mariner-62_HSal	TRUE	TRUE	TRUE	#35978f
18	Merlin-1_DR	TRUE	TRUE	TRUE	#35978f
18	MuDr-1x_SP	TRUE	TRUE	TRUE	#35978f
18	Polinton-3_PBa	TRUE	TRUE	TRUE	#35978f
18	REP-4_PBa	TRUE	TRUE	TRUE	#35978f
18	Rex1-31_DRe	TRUE	TRUE	TRUE	#35978f
18	SAT-1_SK	TRUE	TRUE	TRUE	#35978f
18	Sola1-1_AC	TRUE	TRUE	TRUE	#35978f
18	Tx1-3_PM	TRUE	TRUE	TRUE	#35978f
18	U2	TRUE	TRUE	TRUE	#35978f
18	U6	TRUE	TRUE	TRUE	#35978f
17	Academ-4_SP	TRUE	TRUE	TRUE	#35978f
17	Chapaev-8_HM	TRUE	TRUE	TRUE	#35978f
17	Copia-7_ES-I	TRUE	TRUE	TRUE	#35978f
17	DNA-11_CGi	TRUE	TRUE	TRUE	#35978f
17	DNA-1-2_DR	TRUE	TRUE	TRUE	#35978f
17	DNA3-4_CGi	TRUE	TRUE	TRUE	#35978f
17	DNA-N4_DR	TRUE	TRUE	TRUE	#35978f
17	EnSpm-1_HM	TRUE	TRUE	TRUE	#35978f
17	EnSpm1_HV	TRUE	TRUE	TRUE	#35978f
17	EnSpm-4_HM	TRUE	TRUE	TRUE	#35978f
17	EnSpm-6N1_DR	TRUE	TRUE	TRUE	#35978f
17	EnSpm-7_HM	TRUE	TRUE	TRUE	#35978f
17	EnSpm-9_DR	TRUE	TRUE	TRUE	#35978f
17	EnSpm-N14_DR	TRUE	TRUE	TRUE	#35978f
17	ERV1-1_SSc-I	TRUE	TRUE	TRUE	#35978f
17	ERV1-N3-I_DR	TRUE	TRUE	TRUE	#35978f
17	ERV1-N6-I_DR	TRUE	TRUE	TRUE	#35978f
17	ERV38_MD-int	TRUE	TRUE	TRUE	#35978f
17	HARB-6_ALy	TRUE	TRUE	TRUE	#35978f
17	hAT-2n1_DR	TRUE	TRUE	TRUE	#35978f
17	hAT-N131_DR	TRUE	TRUE	TRUE	#35978f
17	Homo6	TRUE	TRUE	TRUE	#35978f
17	ISL2EU-3N1_CFl	TRUE	TRUE	TRUE	#35978f
17	ISL2EU-8_CGi	TRUE	TRUE	TRUE	#35978f
17	Kolobok-2_DR	TRUE	TRUE	TRUE	#35978f
17	Kolobok-2_XT	TRUE	TRUE	TRUE	#35978f
17	L1_AC_7	TRUE	TRUE	TRUE	#35978f
17	MinoAg1	TRUE	TRUE	TRUE	#35978f
17	MUDRAVI1	TRUE	TRUE	TRUE	#35978f
17	Nimb-4_DR	TRUE	TRUE	TRUE	#35978f
17	Penelope-1_DR	TRUE	TRUE	TRUE	#35978f
17	Polinton-1_SP	TRUE	TRUE	TRUE	#35978f
17	Polinton-2_PBa	TRUE	TRUE	TRUE	#35978f
17	ROO_I-int	TRUE	TRUE	TRUE	#35978f
17	Sola1-2_AC	TRUE	TRUE	TRUE	#35978f
17	TE-5_CGi	TRUE	TRUE	TRUE	#35978f
17	TE-X-4_DR	TRUE	TRUE	TRUE	#35978f
16	CATCH2LTR_DR	TRUE	TRUE	TRUE	#35978f
16	Chapaev-3_HM	TRUE	TRUE	TRUE	#35978f
16	Chapaev-6_HM	TRUE	TRUE	TRUE	#35978f
16	Copia17-NVi_I-int	TRUE	TRUE	TRUE	#35978f
16	Copia-1_CMe-I	TRUE	TRUE	TRUE	#35978f
16	Copia-1_ES-I	TRUE	TRUE	TRUE	#35978f
16	CR1-80_HM	TRUE	TRUE	TRUE	#35978f
16	Dada-tY_PMar	TRUE	TRUE	TRUE	#35978f
16	DIRS-15B_DR	TRUE	TRUE	TRUE	#35978f
16	DNA-2-18_DR	TRUE	TRUE	TRUE	#35978f
16	DNA-2-32_DR	TRUE	TRUE	TRUE	#35978f
16	DNA8-25_DR	TRUE	TRUE	TRUE	#35978f
16	DNA8-26_DR	TRUE	TRUE	TRUE	#35978f
16	DNA-8-5_DR	TRUE	TRUE	TRUE	#35978f
16	EnSpm-1_HV	TRUE	TRUE	TRUE	#35978f
16	EnSpm-22_HMa	TRUE	TRUE	TRUE	#35978f
16	EnSpm-2_TD	TRUE	TRUE	TRUE	#35978f
16	EnSpm-30_SBi	TRUE	TRUE	TRUE	#35978f
16	EnSpm-N2_DR	TRUE	TRUE	TRUE	#35978f
16	Ginger2-1_LS	TRUE	TRUE	TRUE	#35978f
16	Gypsy-29_DWil-I	TRUE	TRUE	TRUE	#35978f
16	HAL1-2a_MD	TRUE	TRUE	TRUE	#35978f
16	HARB-4_Mad	TRUE	TRUE	TRUE	#35978f
16	Harbinger2N_TP	TRUE	TRUE	TRUE	#35978f
16	HAT-10_Mad	TRUE	TRUE	TRUE	#35978f
16	hAT-42_Lch	TRUE	TRUE	TRUE	#35978f
16	hAT-50_HM	TRUE	TRUE	TRUE	#35978f
16	hAT6-2_SP	TRUE	TRUE	TRUE	#35978f
16	hATm-19_HM	TRUE	TRUE	TRUE	#35978f
16	hAT-N127_DR	TRUE	TRUE	TRUE	#35978f
16	Helitron-1_DR	TRUE	TRUE	TRUE	#35978f
16	Helitron-3_ZM	TRUE	TRUE	TRUE	#35978f
16	Helitron-4_DR	TRUE	TRUE	TRUE	#35978f
16	Helitron-N1_HSal	TRUE	TRUE	TRUE	#35978f
16	Helitron-N2_DR	TRUE	TRUE	TRUE	#35978f
16	Helitron-N3_DR	TRUE	TRUE	TRUE	#35978f
16	IS3EU-N1_CGi	TRUE	TRUE	TRUE	#35978f
16	L1-55_XT	TRUE	TRUE	TRUE	#35978f
16	L2-8_NVi	TRUE	TRUE	TRUE	#35978f
16	Mariner-N13_HSal	TRUE	TRUE	TRUE	#35978f
16	MdoLTR2-int	TRUE	TRUE	TRUE	#35978f
16	MuDr-3_HM	TRUE	TRUE	TRUE	#35978f
16	MuDR-N1_ZM	TRUE	TRUE	TRUE	#35978f
16	Neptune_Hyd	TRUE	TRUE	TRUE	#35978f
16	P-30_HM	TRUE	TRUE	TRUE	#35978f
16	RLTR32_Rn	TRUE	TRUE	TRUE	#35978f
16	RNLTR2d	TRUE	TRUE	TRUE	#35978f
16	SAT-23_DR	TRUE	TRUE	TRUE	#35978f
16	Transib-6_HM	TRUE	TRUE	TRUE	#35978f
16	Ves2_ML	TRUE	TRUE	TRUE	#35978f
16	Zisupton-1_DR	TRUE	TRUE	TRUE	#35978f
15	Academ-1_SK	TRUE	TRUE	TRUE	#35978f
15	CR1-1_NV	TRUE	TRUE	TRUE	#35978f
15	CR1-2_CQ	TRUE	TRUE	TRUE	#35978f
15	CR1-35_HM	TRUE	TRUE	TRUE	#35978f
15	CR1-42_HM	TRUE	TRUE	TRUE	#35978f
15	CR1-79_HM	TRUE	TRUE	TRUE	#35978f
15	CR1_Ele9	TRUE	TRUE	TRUE	#35978f
15	CryptonV-3_DR	TRUE	TRUE	TRUE	#35978f
15	CVE	TRUE	TRUE	TRUE	#35978f
15	DIRS-21_ACar	TRUE	TRUE	TRUE	#35978f
15	DNA2-10_CGi	TRUE	TRUE	TRUE	#35978f
15	DNA-2-12_DR	TRUE	TRUE	TRUE	#35978f
15	DNA3-11_Mad	TRUE	TRUE	TRUE	#35978f
15	DNA4-24_CGi	TRUE	TRUE	TRUE	#35978f
15	DNA6-9_CGi	TRUE	TRUE	TRUE	#35978f
15	DNA8-21_DR	TRUE	TRUE	TRUE	#35978f
15	DNA9TA1_DR	TRUE	TRUE	TRUE	#35978f
15	EnSpm-12_OS	TRUE	TRUE	TRUE	#35978f
15	EnSpm-2_HM	TRUE	TRUE	TRUE	#35978f
15	EnSpm2_SB	TRUE	TRUE	TRUE	#35978f
15	ENSPM2_VV	TRUE	TRUE	TRUE	#35978f
15	EnSpm-3_TA	TRUE	TRUE	TRUE	#35978f
15	EnSpm-5_VV	TRUE	TRUE	TRUE	#35978f
15	EnSpm-N10_DR	TRUE	TRUE	TRUE	#35978f
15	ERV-2B_Crp-LTR	TRUE	TRUE	TRUE	#35978f
15	Ginger1-5_HM	TRUE	TRUE	TRUE	#35978f
15	Ginger1-6_HM	TRUE	TRUE	TRUE	#35978f
15	Gypsy14-LTR_Dpse	TRUE	TRUE	TRUE	#35978f
15	Gypsy-1_CMe-I	TRUE	TRUE	TRUE	#35978f
15	Gypsy-22_DWil-I	TRUE	TRUE	TRUE	#35978f
15	Gypsy-34_NVi-I	TRUE	TRUE	TRUE	#35978f
15	Gypsy37-I_AG	TRUE	TRUE	TRUE	#35978f
15	Gypsy-47_Mad-I	TRUE	TRUE	TRUE	#35978f
15	Gypsy-6_AEc-LTR	TRUE	TRUE	TRUE	#35978f
15	Gypsy82-LTR_Dr	TRUE	TRUE	TRUE	#35978f
15	HARB-4N1_Mad	TRUE	TRUE	TRUE	#35978f
15	Harbinger-2_DR	TRUE	TRUE	TRUE	#35978f
15	hAT-10_XT	TRUE	TRUE	TRUE	#35978f
15	hAT-13_DR	TRUE	TRUE	TRUE	#35978f
15	hAT-2_DR	TRUE	TRUE	TRUE	#35978f
15	hAT-51_HM	TRUE	TRUE	TRUE	#35978f
15	hAT-54_HM	TRUE	TRUE	TRUE	#35978f
15	hAT-N21_DR	TRUE	TRUE	TRUE	#35978f
15	hAT-N36_DR	TRUE	TRUE	TRUE	#35978f
15	hAT-N5_ACar	TRUE	TRUE	TRUE	#35978f
15	hAT-N71_DR	TRUE	TRUE	TRUE	#35978f
15	HELITRON7_OS	TRUE	TRUE	TRUE	#35978f
15	Helitron-9_CGi	TRUE	TRUE	TRUE	#35978f
15	HeT-A3_DVi	TRUE	TRUE	TRUE	#35978f
15	L1-53_DR	TRUE	TRUE	TRUE	#35978f
15	L2_AC_2	TRUE	TRUE	TRUE	#35978f
15	LatiHarb1-2	TRUE	TRUE	TRUE	#35978f
15	LTR-12D_Gav	TRUE	TRUE	TRUE	#35978f
15	LTR1A2_ML	TRUE	TRUE	TRUE	#35978f
15	LTR44B_MD	TRUE	TRUE	TRUE	#35978f
15	Mariner-14_LCh	TRUE	TRUE	TRUE	#35978f
15	Mariner-2_SLL	TRUE	TRUE	TRUE	#35978f
15	Mariner-31_HM	TRUE	TRUE	TRUE	#35978f
15	MuDR-1_NV	TRUE	TRUE	TRUE	#35978f
15	MuDR-5_VV	TRUE	TRUE	TRUE	#35978f
15	P-34_HM	TRUE	TRUE	TRUE	#35978f
15	Penelope-13_HM	TRUE	TRUE	TRUE	#35978f
15	Polinton-1_NVi	TRUE	TRUE	TRUE	#35978f
15	Poseidon-2B_PM	TRUE	TRUE	TRUE	#35978f
15	PRIMA4-int	TRUE	TRUE	TRUE	#35978f
15	R1_DYa	TRUE	TRUE	TRUE	#35978f
15	R5-1_SM	TRUE	TRUE	TRUE	#35978f
15	RLTR31D_MM	TRUE	TRUE	TRUE	#35978f
15	TE-X-4_NVi	TRUE	TRUE	TRUE	#35978f
15	Transib-1_HM	TRUE	TRUE	TRUE	#35978f
14	Ambal-2_FCy	TRUE	TRUE	TRUE	#35978f
14	CACTA-1_CapOwc	TRUE	TRUE	TRUE	#35978f
14	Chapaev3-1_HR	TRUE	TRUE	TRUE	#35978f
14	Chapaev-3A_HM	TRUE	TRUE	TRUE	#35978f
14	Coprina_Cc1	TRUE	TRUE	TRUE	#35978f
14	Crack-2_SP	TRUE	TRUE	TRUE	#35978f
14	CryptonV-1_DR	TRUE	TRUE	TRUE	#35978f
14	Dada-tA_DR	TRUE	TRUE	TRUE	#35978f
14	Daphne-73_HMa	TRUE	TRUE	TRUE	#35978f
14	DNA-1-8_DR	TRUE	TRUE	TRUE	#35978f
14	DNA-2-24B_DR	TRUE	TRUE	TRUE	#35978f
14	DNA-2-24_DR	TRUE	TRUE	TRUE	#35978f
14	DNA3-14_CGi	TRUE	TRUE	TRUE	#35978f
14	DNA-3_FV	TRUE	TRUE	TRUE	#35978f
14	EnSpm-10_HM	TRUE	TRUE	TRUE	#35978f
14	EnSpm-16_HM	TRUE	TRUE	TRUE	#35978f
14	EnSpm-1_TA	TRUE	TRUE	TRUE	#35978f
14	EnSpm-21_HMa	TRUE	TRUE	TRUE	#35978f
14	EnSpm-34_SBi	TRUE	TRUE	TRUE	#35978f
14	EnSpm-9_OS	TRUE	TRUE	TRUE	#35978f
14	Gypsy-15_LBS-I	TRUE	TRUE	TRUE	#35978f
14	Gypsy-1_CMe-LTR	TRUE	TRUE	TRUE	#35978f
14	Gypsy-21_PBa-LTR	TRUE	TRUE	TRUE	#35978f
14	Gypsy-22_SB-I	TRUE	TRUE	TRUE	#35978f
14	Gypsy-24_DEl-I	TRUE	TRUE	TRUE	#35978f
14	Gypsy-31-LTR_DR	TRUE	TRUE	TRUE	#35978f
14	Gypsy-40_Mad-I	TRUE	TRUE	TRUE	#35978f
14	Gypsy-46_Mad-I	TRUE	TRUE	TRUE	#35978f
14	Gypsy-50_GA-LTR	TRUE	TRUE	TRUE	#35978f
14	Gypsy-53_PM-LTR	TRUE	TRUE	TRUE	#35978f
14	Gypsy-55_CGi-I	TRUE	TRUE	TRUE	#35978f
14	Gypsy-63_CQ-I	TRUE	TRUE	TRUE	#35978f
14	Gypsy-6_LCh-I	TRUE	TRUE	TRUE	#35978f
14	Gypsy6-NVi_LTR	TRUE	TRUE	TRUE	#35978f
14	HAL1-3A_ME	TRUE	TRUE	TRUE	#35978f
14	Harbinger-1_DR	TRUE	TRUE	TRUE	#35978f
14	Harbinger-1_XT	TRUE	TRUE	TRUE	#35978f
14	Harbinger2-1_NV	TRUE	TRUE	TRUE	#35978f
14	Harbinger-8_DR	TRUE	TRUE	TRUE	#35978f
14	hAT-42_HM	TRUE	TRUE	TRUE	#35978f
14	hAT-47_HM	TRUE	TRUE	TRUE	#35978f
14	HATN11B_DR	TRUE	TRUE	TRUE	#35978f
14	hAT-N34_DR	TRUE	TRUE	TRUE	#35978f
14	hAT-N70_DR	TRUE	TRUE	TRUE	#35978f
14	Helitron-1_HM	TRUE	TRUE	TRUE	#35978f
14	Helitron-3N3_PM	TRUE	TRUE	TRUE	#35978f
14	Helitron-3_PM	TRUE	TRUE	TRUE	#35978f
14	Helitron-N1_PBa	TRUE	TRUE	TRUE	#35978f
14	Helitron-N34_CGi	TRUE	TRUE	TRUE	#35978f
14	Jockey-2_DGri	TRUE	TRUE	TRUE	#35978f
14	Kolobok-2_AP	TRUE	TRUE	TRUE	#35978f
14	Kolobok-3_DR	TRUE	TRUE	TRUE	#35978f
14	Kolobok-4_DR	TRUE	TRUE	TRUE	#35978f
14	L1-56_DR	TRUE	TRUE	TRUE	#35978f
14	L1-61_ACar	TRUE	TRUE	TRUE	#35978f
14	LatiHarb1-1	TRUE	TRUE	TRUE	#35978f
14	LOOPERN2_DR	TRUE	TRUE	TRUE	#35978f
14	LTR160B_MD	TRUE	TRUE	TRUE	#35978f
14	LTR24_Sar	TRUE	TRUE	TRUE	#35978f
14	Mariner-18_HSal	TRUE	TRUE	TRUE	#35978f
14	Mariner-29_HM	TRUE	TRUE	TRUE	#35978f
14	Mariner-39_HM	TRUE	TRUE	TRUE	#35978f
14	Mariner-52_HSal	TRUE	TRUE	TRUE	#35978f
14	Mariner-79B_HSal	TRUE	TRUE	TRUE	#35978f
14	Mariner-N3_DR	TRUE	TRUE	TRUE	#35978f
14	Mariner-N5_HSal	TRUE	TRUE	TRUE	#35978f
14	MINIME_DN	TRUE	TRUE	TRUE	#35978f
14	MOSAT-2_DR	TRUE	TRUE	TRUE	#35978f
14	MuDR-10_GM	TRUE	TRUE	TRUE	#35978f
14	MuDR-8_VV	TRUE	TRUE	TRUE	#35978f
14	MUDSOLT1	TRUE	TRUE	TRUE	#35978f
14	Nematis_Cr	TRUE	TRUE	TRUE	#35978f
14	OK	TRUE	TRUE	TRUE	#35978f
14	P-1_DR	TRUE	TRUE	TRUE	#35978f
14	P-26_HM	TRUE	TRUE	TRUE	#35978f
14	P-27_HM	TRUE	TRUE	TRUE	#35978f
14	P-2_HM	TRUE	TRUE	TRUE	#35978f
14	Polinton-2_SP	TRUE	TRUE	TRUE	#35978f
14	Polinton-4_PBa	TRUE	TRUE	TRUE	#35978f
14	Polinton-5_NV	TRUE	TRUE	TRUE	#35978f
14	RLTR20A4	TRUE	TRUE	TRUE	#35978f
14	RTEX-1_CR	TRUE	TRUE	TRUE	#35978f
14	TE-X-12_DR	TRUE	TRUE	TRUE	#35978f
14	Transib-2_HM	TRUE	TRUE	TRUE	#35978f
14	TSESSEBEII	TRUE	TRUE	TRUE	#35978f
14	TUBE2	TRUE	TRUE	TRUE	#35978f
14	Tx1-5_PM	TRUE	TRUE	TRUE	#35978f
14	U5	TRUE	TRUE	TRUE	#35978f
14	Z-REP	TRUE	TRUE	TRUE	#35978f
13	Academ-1_HM	TRUE	TRUE	TRUE	#35978f
13	ACROBAT1	TRUE	TRUE	TRUE	#35978f
13	BHIKHARI-5-I_DR	TRUE	TRUE	TRUE	#35978f
13	Copia-14_BG-I	TRUE	TRUE	TRUE	#35978f
13	Copia-47_Mad-LTR	TRUE	TRUE	TRUE	#35978f
13	Copia-75_Mad-LTR	TRUE	TRUE	TRUE	#35978f
13	CR1-3_HM	TRUE	TRUE	TRUE	#35978f
13	Dada-U6_DR	TRUE	TRUE	TRUE	#35978f
13	Daphne-16_HMa	TRUE	TRUE	TRUE	#35978f
13	DNA-1_FV	TRUE	TRUE	TRUE	#35978f
13	DNA2-1_DR	TRUE	TRUE	TRUE	#35978f
13	DNA2-6_CGi	TRUE	TRUE	TRUE	#35978f
13	DNA2-7_DR	TRUE	TRUE	TRUE	#35978f
13	DNA3-10_CGi	TRUE	TRUE	TRUE	#35978f
13	DNA3-13B_CGi	TRUE	TRUE	TRUE	#35978f
13	DNA8-12_CGi	TRUE	TRUE	TRUE	#35978f
13	DNA9-4_CGi	TRUE	TRUE	TRUE	#35978f
13	DNA9-6_DR	TRUE	TRUE	TRUE	#35978f
13	DNA-X-16_DR	TRUE	TRUE	TRUE	#35978f
13	DongAG	TRUE	TRUE	TRUE	#35978f
13	EnSpm-14_HM	TRUE	TRUE	TRUE	#35978f
13	EnSpm-15_HM	TRUE	TRUE	TRUE	#35978f
13	EnSpm-16_DR	TRUE	TRUE	TRUE	#35978f
13	EnSpm-1_BF	TRUE	TRUE	TRUE	#35978f
13	EnSpm-22_SBi	TRUE	TRUE	TRUE	#35978f
13	EnSpm2_PTr	TRUE	TRUE	TRUE	#35978f
13	EnSpm-5_DR	TRUE	TRUE	TRUE	#35978f
13	EnSpm-6_FV	TRUE	TRUE	TRUE	#35978f
13	ENSPM-6_ZM	TRUE	TRUE	TRUE	#35978f
13	ERV1-2-I_Lch	TRUE	TRUE	TRUE	#35978f
13	Ginger1-10_HM	TRUE	TRUE	TRUE	#35978f
13	Gypsy10-LTR_SP	TRUE	TRUE	TRUE	#35978f
13	Gypsy-120_SB-I	TRUE	TRUE	TRUE	#35978f
13	Gypsy-13_SMo-LTR	TRUE	TRUE	TRUE	#35978f
13	Gypsy-23_DEl-I	TRUE	TRUE	TRUE	#35978f
13	Gypsy-6_DEu-I	TRUE	TRUE	TRUE	#35978f
13	Gypsy-74-I_ZM	TRUE	TRUE	TRUE	#35978f
13	Gypsy8-SM_I-int	TRUE	TRUE	TRUE	#35978f
13	hAT-21_CPB	TRUE	TRUE	TRUE	#35978f
13	hAT-310_Ami	TRUE	TRUE	TRUE	#35978f
13	hAT6-2_NV	TRUE	TRUE	TRUE	#35978f
13	hATa-1_EHux	TRUE	TRUE	TRUE	#35978f
13	HATN16_DR	TRUE	TRUE	TRUE	#35978f
13	hAT-N36C_DR	TRUE	TRUE	TRUE	#35978f
13	hATN-4_ACar	TRUE	TRUE	TRUE	#35978f
13	hAT-N68_DR	TRUE	TRUE	TRUE	#35978f
13	Helitron-4N1_SMo	TRUE	TRUE	TRUE	#35978f
13	Helitron-N35_CGi	TRUE	TRUE	TRUE	#35978f
13	I-1_DP	TRUE	TRUE	TRUE	#35978f
13	ISL2EU-17_CGi	TRUE	TRUE	TRUE	#35978f
13	Jockey_Ele2	TRUE	TRUE	TRUE	#35978f
13	Kolobok-7_CGi	TRUE	TRUE	TRUE	#35978f
13	L1-1_STu	TRUE	TRUE	TRUE	#35978f
13	L1-2_VC	TRUE	TRUE	TRUE	#35978f
13	L1-48_DR	TRUE	TRUE	TRUE	#35978f
13	L1-67_DR	TRUE	TRUE	TRUE	#35978f
13	L2B-4B_AAe	TRUE	TRUE	TRUE	#35978f
13	LTR-1_Mad	TRUE	TRUE	TRUE	#35978f
13	Mariner-14_SIn	TRUE	TRUE	TRUE	#35978f
13	Mariner-15_SIn	TRUE	TRUE	TRUE	#35978f
13	Mariner-30_HM	TRUE	TRUE	TRUE	#35978f
13	Mariner-4_LHu	TRUE	TRUE	TRUE	#35978f
13	Mariner-N22_HSal	TRUE	TRUE	TRUE	#35978f
13	Mariner-N39_HSal	TRUE	TRUE	TRUE	#35978f
13	MOSAT_DR	TRUE	TRUE	TRUE	#35978f
13	MuDR1_HV	TRUE	TRUE	TRUE	#35978f
13	MuDR-21_VV	TRUE	TRUE	TRUE	#35978f
13	MuDR-4_GM	TRUE	TRUE	TRUE	#35978f
13	MUDRAVI2	TRUE	TRUE	TRUE	#35978f
13	Polinton-1N1_DR	TRUE	TRUE	TRUE	#35978f
13	Polinton-1_XT	TRUE	TRUE	TRUE	#35978f
13	Polinton-2_DR	TRUE	TRUE	TRUE	#35978f
13	Polinton-3_TC	TRUE	TRUE	TRUE	#35978f
13	RLTR17B_Mm	TRUE	TRUE	TRUE	#35978f
13	RLTR20C1_MM	TRUE	TRUE	TRUE	#35978f
13	RLTR51A_Mm	TRUE	TRUE	TRUE	#35978f
13	RMER12C	TRUE	TRUE	TRUE	#35978f
13	Sat-1_TSy	TRUE	TRUE	TRUE	#35978f
13	SAT2_CM	TRUE	TRUE	TRUE	#35978f
13	Sola3-1_CapOwc	TRUE	TRUE	TRUE	#35978f
13	SPMLIKE	TRUE	TRUE	TRUE	#35978f
13	STOWAWAY50_OS	TRUE	TRUE	TRUE	#35978f
13	TE-2_XT	TRUE	TRUE	TRUE	#35978f
13	Transib-10_HM	TRUE	TRUE	TRUE	#35978f
13	TRAS1	TRUE	TRUE	TRUE	#35978f
13	TRAS3_BM	TRUE	TRUE	TRUE	#35978f
13	TRE3D	TRUE	TRUE	TRUE	#35978f
13	TUB1	TRUE	TRUE	TRUE	#35978f
13	Tx1-34_DR	TRUE	TRUE	TRUE	#35978f
13	ZFERV-2-I_DR	TRUE	TRUE	TRUE	#35978f
12	ATHAT1	TRUE	TRUE	TRUE	#35978f
12	BEL-13_LH-I	TRUE	TRUE	TRUE	#35978f
12	BEL-30_CQ-LTR	TRUE	TRUE	TRUE	#35978f
12	BEL-50_DRe-LTR	TRUE	TRUE	TRUE	#35978f
12	BMRP1	TRUE	TRUE	TRUE	#35978f
12	CASAT_HD	TRUE	TRUE	TRUE	#35978f
12	Chapaev-1_AA	TRUE	TRUE	TRUE	#35978f
12	Chapaev-3B_HM	TRUE	TRUE	TRUE	#35978f
12	Chapaev-7_HM	TRUE	TRUE	TRUE	#35978f
12	Copia12-ZM_I-int	TRUE	TRUE	TRUE	#35978f
12	Copia-42_SB-I	TRUE	TRUE	TRUE	#35978f
12	Copia-56_SB-I	TRUE	TRUE	TRUE	#35978f
12	DNA-1-7_DR	TRUE	TRUE	TRUE	#35978f
12	DNA2-10_DR	TRUE	TRUE	TRUE	#35978f
12	DNA8-10_DR	TRUE	TRUE	TRUE	#35978f
12	DNA-8-1_HM	TRUE	TRUE	TRUE	#35978f
12	DNA8-2C_CGi	TRUE	TRUE	TRUE	#35978f
12	EnSpm-11_OS	TRUE	TRUE	TRUE	#35978f
12	EnSpm-5_HV	TRUE	TRUE	TRUE	#35978f
12	EnSpm-8_DR	TRUE	TRUE	TRUE	#35978f
12	Eri-2B2_EE	TRUE	TRUE	TRUE	#35978f
12	FUGUREP2	TRUE	TRUE	TRUE	#35978f
12	Gypsy-10_CCO-I	TRUE	TRUE	TRUE	#35978f
12	Gypsy120-LTR_DR	TRUE	TRUE	TRUE	#35978f
12	Gypsy-13_Mad-I	TRUE	TRUE	TRUE	#35978f
12	Gypsy-22_DY-LTR	TRUE	TRUE	TRUE	#35978f
12	Gypsy-38_NVi-LTR	TRUE	TRUE	TRUE	#35978f
12	Gypsy-3_PBa-I	TRUE	TRUE	TRUE	#35978f
12	Gypsy50-I_DR	TRUE	TRUE	TRUE	#35978f
12	Gypsy-600_AA-I	TRUE	TRUE	TRUE	#35978f
12	Gypsy-9-I_CR	TRUE	TRUE	TRUE	#35978f
12	Harbinger2-2_ES	TRUE	TRUE	TRUE	#35978f
12	Harbinger-5_DR	TRUE	TRUE	TRUE	#35978f
12	Harbinger-N16_DR	TRUE	TRUE	TRUE	#35978f
12	hAT-1960_Ami	TRUE	TRUE	TRUE	#35978f
12	hAT-1N1_AC	TRUE	TRUE	TRUE	#35978f
12	hAT-25_DR	TRUE	TRUE	TRUE	#35978f
12	hAT-40_HM	TRUE	TRUE	TRUE	#35978f
12	HAT-4N1_Mad	TRUE	TRUE	TRUE	#35978f
12	hAT-80_HM	TRUE	TRUE	TRUE	#35978f
12	hATm-27_HM	TRUE	TRUE	TRUE	#35978f
12	hATm-47_HM	TRUE	TRUE	TRUE	#35978f
12	hAT-N107_DR	TRUE	TRUE	TRUE	#35978f
12	HATN11_DR	TRUE	TRUE	TRUE	#35978f
12	hAT-N22_DR	TRUE	TRUE	TRUE	#35978f
12	hATw-1_SP	TRUE	TRUE	TRUE	#35978f
12	Helitron-2_HM	TRUE	TRUE	TRUE	#35978f
12	HELMET3	TRUE	TRUE	TRUE	#35978f
12	Homo10	TRUE	TRUE	TRUE	#35978f
12	ISL2EU-N1_CGi	TRUE	TRUE	TRUE	#35978f
12	ISL2EU-N5B_CGi	TRUE	TRUE	TRUE	#35978f
12	Kiri-35_AAe	TRUE	TRUE	TRUE	#35978f
12	L1-47B_ACar	TRUE	TRUE	TRUE	#35978f
12	L1-82_DR	TRUE	TRUE	TRUE	#35978f
12	L1A-2_MD	TRUE	TRUE	TRUE	#35978f
12	L2-17_NV	TRUE	TRUE	TRUE	#35978f
12	L2_Plat1i	TRUE	TRUE	TRUE	#35978f
12	LIN4b_SM	TRUE	TRUE	TRUE	#35978f
12	LTR-12D_Crp	TRUE	TRUE	TRUE	#35978f
12	LTR2C_Opr	TRUE	TRUE	TRUE	#35978f
12	Mariner-17_AEc	TRUE	TRUE	TRUE	#35978f
12	Mariner-52N1_HSal	TRUE	TRUE	TRUE	#35978f
12	Mariner-9_HM	TRUE	TRUE	TRUE	#35978f
12	MERMITE18D	TRUE	TRUE	TRUE	#35978f
12	MuDr-1_HV	TRUE	TRUE	TRUE	#35978f
12	MuDR1_ZM	TRUE	TRUE	TRUE	#35978f
12	MUMET1	TRUE	TRUE	TRUE	#35978f
12	Ngaro1_DR	TRUE	TRUE	TRUE	#35978f
12	P-13_HM	TRUE	TRUE	TRUE	#35978f
12	P-29_HM	TRUE	TRUE	TRUE	#35978f
12	Penelope-12_HM	TRUE	TRUE	TRUE	#35978f
12	Polinton-1_DGr	TRUE	TRUE	TRUE	#35978f
12	Polinton1_SM	TRUE	TRUE	TRUE	#35978f
12	Polinton-2_NV	TRUE	TRUE	TRUE	#35978f
12	Polinton-4_SP	TRUE	TRUE	TRUE	#35978f
12	Polinton-5_SP	TRUE	TRUE	TRUE	#35978f
12	R7Ag2	TRUE	TRUE	TRUE	#35978f
12	RT2	TRUE	TRUE	TRUE	#35978f
12	RTAg3	TRUE	TRUE	TRUE	#35978f
12	Sola1-1_Smoe	TRUE	TRUE	TRUE	#35978f
12	TE7-1_FV	TRUE	TRUE	TRUE	#35978f
12	TE-8_CGi	TRUE	TRUE	TRUE	#35978f
12	Transib-3_HM	TRUE	TRUE	TRUE	#35978f
12	Tx1-25_DR	TRUE	TRUE	TRUE	#35978f
12	U4	TRUE	TRUE	TRUE	#35978f
11	5SrRNA-1_BG	TRUE	TRUE	TRUE	#35978f
11	Academ-3_SP	TRUE	TRUE	TRUE	#35978f
11	ATCopia59_I-int	TRUE	TRUE	TRUE	#35978f
11	ATENSPM10	TRUE	TRUE	TRUE	#35978f
11	Athila7_I-int	TRUE	TRUE	TRUE	#35978f
11	CEREBA_HV-int	TRUE	TRUE	TRUE	#35978f
11	Chapaev-20_HM	TRUE	TRUE	TRUE	#35978f
11	Copia11-VV_LTR	TRUE	TRUE	TRUE	#35978f
11	Copia-143_SB-I	TRUE	TRUE	TRUE	#35978f
11	Copia-23_Mad-I	TRUE	TRUE	TRUE	#35978f
11	Copia2-I_CR	TRUE	TRUE	TRUE	#35978f
11	Copia2-LTR_VC	TRUE	TRUE	TRUE	#35978f
11	CR1-13_NV	TRUE	TRUE	TRUE	#35978f
11	Crypton-7_CGi	TRUE	TRUE	TRUE	#35978f
11	Daphne-21_SPu	TRUE	TRUE	TRUE	#35978f
11	DEL_LH_I-int	TRUE	TRUE	TRUE	#35978f
11	DNA-2-20_DR	TRUE	TRUE	TRUE	#35978f
11	DNA-2-3_DR	TRUE	TRUE	TRUE	#35978f
11	DNA4-42B_CGi	TRUE	TRUE	TRUE	#35978f
11	DNA6-4_DR	TRUE	TRUE	TRUE	#35978f
11	DNA-8-24_DR	TRUE	TRUE	TRUE	#35978f
11	DNA-8-27_DR	TRUE	TRUE	TRUE	#35978f
11	DNA9-5_DR	TRUE	TRUE	TRUE	#35978f
11	DNA-X-12_DR	TRUE	TRUE	TRUE	#35978f
11	DNA-X-17_DR	TRUE	TRUE	TRUE	#35978f
11	DNA-X-5_DR	TRUE	TRUE	TRUE	#35978f
11	EnSpm-10_DR	TRUE	TRUE	TRUE	#35978f
11	EnSpm-16_SBi	TRUE	TRUE	TRUE	#35978f
11	EnSpm-16_ZM	TRUE	TRUE	TRUE	#35978f
11	EnSpm-17_SBi	TRUE	TRUE	TRUE	#35978f
11	EnSpm-19_HMa	TRUE	TRUE	TRUE	#35978f
11	EnSpm-1_NV	TRUE	TRUE	TRUE	#35978f
11	EnSpm-2_TA	TRUE	TRUE	TRUE	#35978f
11	EnSpm-3_HV	TRUE	TRUE	TRUE	#35978f
11	EnSpm-43_SBi	TRUE	TRUE	TRUE	#35978f
11	EnSpm-4_Mad	TRUE	TRUE	TRUE	#35978f
11	EnSpm6_SB	TRUE	TRUE	TRUE	#35978f
11	EnSpm-8_HM	TRUE	TRUE	TRUE	#35978f
11	EnSpm8_SB	TRUE	TRUE	TRUE	#35978f
11	EnSpm-N1_DR	TRUE	TRUE	TRUE	#35978f
11	ERV1-4-EC_I-int	TRUE	TRUE	TRUE	#35978f
11	ERV1-N7-I_DR	TRUE	TRUE	TRUE	#35978f
11	ERV46_MD_I-int	TRUE	TRUE	TRUE	#35978f
11	GLT2_SM	TRUE	TRUE	TRUE	#35978f
11	Gypsy118-LTR_DR	TRUE	TRUE	TRUE	#35978f
11	Gypsy-16_PBa-LTR	TRUE	TRUE	TRUE	#35978f
11	Gypsy-18B_PBa-I	TRUE	TRUE	TRUE	#35978f
11	Gypsy-18_PBa-I	TRUE	TRUE	TRUE	#35978f
11	Gypsy1-SM_LTR	TRUE	TRUE	TRUE	#35978f
11	Gypsy-38_DWil-I	TRUE	TRUE	TRUE	#35978f
11	Gypsy-43_DWil-I	TRUE	TRUE	TRUE	#35978f
11	Gypsy4-SM_I-int	TRUE	TRUE	TRUE	#35978f
11	Gypsy55-I_AG	TRUE	TRUE	TRUE	#35978f
11	Gypsy58-I_AG	TRUE	TRUE	TRUE	#35978f
11	Gypsy-62_BG-LTR	TRUE	TRUE	TRUE	#35978f
11	Gypsy6-I_Dmoj	TRUE	TRUE	TRUE	#35978f
11	Gypsy7-I_Dya	TRUE	TRUE	TRUE	#35978f
11	Gypsy-8_HMM-LTR	TRUE	TRUE	TRUE	#35978f
11	Gypsy-9_PBa-I	TRUE	TRUE	TRUE	#35978f
11	Harbinger2-2_HM	TRUE	TRUE	TRUE	#35978f
11	Harbinger-2_GA	TRUE	TRUE	TRUE	#35978f
11	Harbinger-2_LCh	TRUE	TRUE	TRUE	#35978f
11	Harbinger-3_BF	TRUE	TRUE	TRUE	#35978f
11	Harbinger3_DR	TRUE	TRUE	TRUE	#35978f
11	Harbinger-4_XT	TRUE	TRUE	TRUE	#35978f
11	hAT-12_VVi	TRUE	TRUE	TRUE	#35978f
11	hAT-21N2_LMi	TRUE	TRUE	TRUE	#35978f
11	hAT-32_HM	TRUE	TRUE	TRUE	#35978f
11	HAT-4_Mad	TRUE	TRUE	TRUE	#35978f
11	hATm-40_HM	TRUE	TRUE	TRUE	#35978f
11	hATm-54_HM	TRUE	TRUE	TRUE	#35978f
11	hAT-N145_DR	TRUE	TRUE	TRUE	#35978f
11	HATN15_DR	TRUE	TRUE	TRUE	#35978f
11	hAT-N6_ACar	TRUE	TRUE	TRUE	#35978f
11	hATw-1_LV	TRUE	TRUE	TRUE	#35978f
11	Helitron1_AG	TRUE	TRUE	TRUE	#35978f
11	Helitron-1_DT	TRUE	TRUE	TRUE	#35978f
11	Helitron-1_DVir	TRUE	TRUE	TRUE	#35978f
11	Helitron-3N1_NVi	TRUE	TRUE	TRUE	#35978f
11	Helitron-N3_PM	TRUE	TRUE	TRUE	#35978f
11	HMSBEAGLE_I-int	TRUE	TRUE	TRUE	#35978f
11	ISL2EU-1_CFl	TRUE	TRUE	TRUE	#35978f
11	ISL2EU-1_SK	TRUE	TRUE	TRUE	#35978f
11	Jockey-3_DPer	TRUE	TRUE	TRUE	#35978f
11	Kolobok-1_DR	TRUE	TRUE	TRUE	#35978f
11	L2_AC_11	TRUE	TRUE	TRUE	#35978f
11	L2_AC_14	TRUE	TRUE	TRUE	#35978f
11	LatiHarb1-N1	TRUE	TRUE	TRUE	#35978f
11	LTR42_MD	TRUE	TRUE	TRUE	#35978f
11	Mariner-13_SIn	TRUE	TRUE	TRUE	#35978f
11	Mariner-19_HSal	TRUE	TRUE	TRUE	#35978f
11	Mariner-21_SIn	TRUE	TRUE	TRUE	#35978f
11	Mariner-N10_SIn	TRUE	TRUE	TRUE	#35978f
11	Mariner-N6_SIn	TRUE	TRUE	TRUE	#35978f
11	MdoERV2a-int	TRUE	TRUE	TRUE	#35978f
11	MERMITE18C	TRUE	TRUE	TRUE	#35978f
11	MSAT_MG	TRUE	TRUE	TRUE	#35978f
11	MuDR-11B_GM	TRUE	TRUE	TRUE	#35978f
11	MuDR-11_GM	TRUE	TRUE	TRUE	#35978f
11	MuDR-18_VV	TRUE	TRUE	TRUE	#35978f
11	MuDR-1_LHu	TRUE	TRUE	TRUE	#35978f
11	MULE-1_CapOwc	TRUE	TRUE	TRUE	#35978f
11	OSMAR1	TRUE	TRUE	TRUE	#35978f
11	P-1_AllMac	TRUE	TRUE	TRUE	#35978f
11	P-1_DBp	TRUE	TRUE	TRUE	#35978f
11	Pigibakku	TRUE	TRUE	TRUE	#35978f
11	Polinton-7_NVi	TRUE	TRUE	TRUE	#35978f
11	polypyrimidine	TRUE	TRUE	TRUE	#35978f
11	Proto1-2_NG	TRUE	TRUE	TRUE	#35978f
11	RLTR20C2_MM	TRUE	TRUE	TRUE	#35978f
11	RNSAT1c	TRUE	TRUE	TRUE	#35978f
11	RTEX-2_DR	TRUE	TRUE	TRUE	#35978f
11	SAT-12_DR	TRUE	TRUE	TRUE	#35978f
11	Sola2-1_HM	TRUE	TRUE	TRUE	#35978f
11	TDR13	TRUE	TRUE	TRUE	#35978f
11	Zisupton-3_DR	TRUE	TRUE	TRUE	#35978f
11	Zisupton-4_DR	TRUE	TRUE	TRUE	#35978f
10	5S_DM	TRUE	TRUE	TRUE	#35978f
10	5S-Sauria	TRUE	TRUE	TRUE	#35978f
10	Academ-3_BF	TRUE	TRUE	TRUE	#35978f
10	ATLINE1_10A	TRUE	TRUE	TRUE	#35978f
10	BEL-21_DWil-I	TRUE	TRUE	TRUE	#35978f
10	Copia-18_MLP-I	TRUE	TRUE	TRUE	#35978f
10	Copia3-I_CR	TRUE	TRUE	TRUE	#35978f
10	Copia-52_ZM-I	TRUE	TRUE	TRUE	#35978f
10	Copia-9_TA-I	TRUE	TRUE	TRUE	#35978f
10	CR1-48_HM	TRUE	TRUE	TRUE	#35978f
10	CR1-78_AAe	TRUE	TRUE	TRUE	#35978f
10	Daphne-38_HMa	TRUE	TRUE	TRUE	#35978f
10	DIRS-35_ACar	TRUE	TRUE	TRUE	#35978f
10	DIRS-4N2_DR	TRUE	TRUE	TRUE	#35978f
10	DIRS-4N3_DR	TRUE	TRUE	TRUE	#35978f
10	DIRS-6_DR	TRUE	TRUE	TRUE	#35978f
10	DNA-2-15_DR	TRUE	TRUE	TRUE	#35978f
10	DNA3-8_STu	TRUE	TRUE	TRUE	#35978f
10	DNA4-6_CGi	TRUE	TRUE	TRUE	#35978f
10	DNA-6-N2_DR	TRUE	TRUE	TRUE	#35978f
10	EnSpm-17_ZM	TRUE	TRUE	TRUE	#35978f
10	EnSpm-1_TM	TRUE	TRUE	TRUE	#35978f
10	EnSpm1_TM	TRUE	TRUE	TRUE	#35978f
10	EnSpm-2_FV	TRUE	TRUE	TRUE	#35978f
10	EnSpm2_TM	TRUE	TRUE	TRUE	#35978f
10	EnSpm-4_HV	TRUE	TRUE	TRUE	#35978f
10	EnSpm-4_VV	TRUE	TRUE	TRUE	#35978f
10	EnSpm-9_HM	TRUE	TRUE	TRUE	#35978f
10	EnSpm-N11_DR	TRUE	TRUE	TRUE	#35978f
10	EnSpm-N17_DR	TRUE	TRUE	TRUE	#35978f
10	ERV-3_LCh-LTR	TRUE	TRUE	TRUE	#35978f
10	ERV6B-MD_I-int	TRUE	TRUE	TRUE	#35978f
10	GRANDE1_ZD-int	TRUE	TRUE	TRUE	#35978f
10	Gypsy-10_DVir-LTR	TRUE	TRUE	TRUE	#35978f
10	Gypsy-199_ZM-I	TRUE	TRUE	TRUE	#35978f
10	Gypsy-210_DR-I	TRUE	TRUE	TRUE	#35978f
10	Gypsy-226_DR-LTR	TRUE	TRUE	TRUE	#35978f
10	Gypsy-22_DWil-LTR	TRUE	TRUE	TRUE	#35978f
10	Gypsy-25_PMar-I	TRUE	TRUE	TRUE	#35978f
10	Gypsy-26-I_NVi	TRUE	TRUE	TRUE	#35978f
10	Gypsy-2_DFa-I	TRUE	TRUE	TRUE	#35978f
10	Gypsy-35_CQ-I	TRUE	TRUE	TRUE	#35978f
10	Gypsy-35_Mad-I	TRUE	TRUE	TRUE	#35978f
10	Gypsy-37_CQ-I	TRUE	TRUE	TRUE	#35978f
10	Gypsy3-LTR_AP	TRUE	TRUE	TRUE	#35978f
10	Gypsy-53_SB-LTR	TRUE	TRUE	TRUE	#35978f
10	Gypsy-54_GM-LTR	TRUE	TRUE	TRUE	#35978f
10	Gypsy56-I_DR	TRUE	TRUE	TRUE	#35978f
10	Gypsy-8_DSe-I	TRUE	TRUE	TRUE	#35978f
10	Gypsy-9_DPu-I	TRUE	TRUE	TRUE	#35978f
10	Harbinger1_DR	TRUE	TRUE	TRUE	#35978f
10	Harbinger-5_CGi	TRUE	TRUE	TRUE	#35978f
10	Harbinger-6_LCh	TRUE	TRUE	TRUE	#35978f
10	hAT-17_Croc	TRUE	TRUE	TRUE	#35978f
10	hAT-1_PBa	TRUE	TRUE	TRUE	#35978f
10	hAT-2N1_TC	TRUE	TRUE	TRUE	#35978f
10	hAT-2_TS	TRUE	TRUE	TRUE	#35978f
10	hAT-43_Lch	TRUE	TRUE	TRUE	#35978f
10	hAT-53_HM	TRUE	TRUE	TRUE	#35978f
10	hAT-68_HM	TRUE	TRUE	TRUE	#35978f
10	hAT-7N2_PM	TRUE	TRUE	TRUE	#35978f
10	hAT-N13_AMi	TRUE	TRUE	TRUE	#35978f
10	hAT-N39_DR	TRUE	TRUE	TRUE	#35978f
10	hAT-N47B_DR	TRUE	TRUE	TRUE	#35978f
10	hAT-N76_DR	TRUE	TRUE	TRUE	#35978f
10	Helitron-1_AC	TRUE	TRUE	TRUE	#35978f
10	Helitron-1N1_DVir	TRUE	TRUE	TRUE	#35978f
10	Helitron-2_DVir	TRUE	TRUE	TRUE	#35978f
10	Helitron-3N2_PM	TRUE	TRUE	TRUE	#35978f
10	HELITRON7_CB	TRUE	TRUE	TRUE	#35978f
10	Helitron-N3_CGi	TRUE	TRUE	TRUE	#35978f
10	Helitron-N3_DT	TRUE	TRUE	TRUE	#35978f
10	Helitron-N3_ZM	TRUE	TRUE	TRUE	#35978f
10	I-7B_AAe	TRUE	TRUE	TRUE	#35978f
10	INGA_HV_I-int	TRUE	TRUE	TRUE	#35978f
10	IS4EU-1_BF	TRUE	TRUE	TRUE	#35978f
10	ISL2EU-3_CFl	TRUE	TRUE	TRUE	#35978f
10	Kolobok-1_LG	TRUE	TRUE	TRUE	#35978f
10	Kolobok-1_SKow	TRUE	TRUE	TRUE	#35978f
10	Kolobok-N9_DR	TRUE	TRUE	TRUE	#35978f
10	L1-11_GM	TRUE	TRUE	TRUE	#35978f
10	L1-3_CR	TRUE	TRUE	TRUE	#35978f
10	L1-71_ACar	TRUE	TRUE	TRUE	#35978f
10	L1_AC_8	TRUE	TRUE	TRUE	#35978f
10	L1_Ele5	TRUE	TRUE	TRUE	#35978f
10	L1-N3_FV	TRUE	TRUE	TRUE	#35978f
10	L2-12b_Lch	TRUE	TRUE	TRUE	#35978f
10	LatiHarb1-N3A	TRUE	TRUE	TRUE	#35978f
10	LatiHarb1-N3B	TRUE	TRUE	TRUE	#35978f
10	LOOPERN3_DR	TRUE	TRUE	TRUE	#35978f
10	LTR18F_ML	TRUE	TRUE	TRUE	#35978f
10	LTR-2_Mad-I	TRUE	TRUE	TRUE	#35978f
10	LTR4_Str	TRUE	TRUE	TRUE	#35978f
10	Mariner-16_SIn	TRUE	TRUE	TRUE	#35978f
10	Mariner-19_HM	TRUE	TRUE	TRUE	#35978f
10	Mariner-29_AEc	TRUE	TRUE	TRUE	#35978f
10	Mariner-33_HM	TRUE	TRUE	TRUE	#35978f
10	Mariner-59N1_HSal	TRUE	TRUE	TRUE	#35978f
10	MER4-int	TRUE	TRUE	TRUE	#35978f
10	MtPH-A6-3-Ia	TRUE	TRUE	TRUE	#35978f
10	MuDR-18_SBi	TRUE	TRUE	TRUE	#35978f
10	MuDR-7_GM	TRUE	TRUE	TRUE	#35978f
10	Neptune3_Ren	TRUE	TRUE	TRUE	#35978f
10	Novosib-3_CR	TRUE	TRUE	TRUE	#35978f
10	NUSIF1_TM	TRUE	TRUE	TRUE	#35978f
10	P-11_HM	TRUE	TRUE	TRUE	#35978f
10	P-1_LHu	TRUE	TRUE	TRUE	#35978f
10	P-2_Hrobusta	TRUE	TRUE	TRUE	#35978f
10	Penelope3_XT	TRUE	TRUE	TRUE	#35978f
10	Polinton-1_DAn	TRUE	TRUE	TRUE	#35978f
10	Polinton-1_DY	TRUE	TRUE	TRUE	#35978f
10	Polinton-1_SM	TRUE	TRUE	TRUE	#35978f
10	Rehavkus-2_HR	TRUE	TRUE	TRUE	#35978f
10	RLTR21	TRUE	TRUE	TRUE	#35978f
10	RNLTR15A2	TRUE	TRUE	TRUE	#35978f
10	SAT-1_PGr	TRUE	TRUE	TRUE	#35978f
10	SFV1-15_AMi-I	TRUE	TRUE	TRUE	#35978f
10	SHAMUDRAV_MT	TRUE	TRUE	TRUE	#35978f
10	SLIDE	TRUE	TRUE	TRUE	#35978f
10	STRIDM	TRUE	TRUE	TRUE	#35978f
10	TDR8B	TRUE	TRUE	TRUE	#35978f
10	Tx1-4_SK	TRUE	TRUE	TRUE	#35978f
10	Vandal13	TRUE	TRUE	TRUE	#35978f
10	XILON1_ZM-int	TRUE	TRUE	TRUE	#35978f
9	5S	TRUE	TRUE	TRUE	#35978f
9	BEL-10_DWil-I	TRUE	TRUE	TRUE	#35978f
9	BEL-4_DPer-I	TRUE	TRUE	TRUE	#35978f
9	BMSAT1	TRUE	TRUE	TRUE	#35978f
9	CACTA-1_Ccinerea	TRUE	TRUE	TRUE	#35978f
9	CACTA-1_PB	TRUE	TRUE	TRUE	#35978f
9	CER15-1-I_CE	TRUE	TRUE	TRUE	#35978f
9	CER7-I_CE	TRUE	TRUE	TRUE	#35978f
9	Chapaev-11_HM	TRUE	TRUE	TRUE	#35978f
9	Copia-12_PAb-LTR	TRUE	TRUE	TRUE	#35978f
9	Copia-33_GM-I	TRUE	TRUE	TRUE	#35978f
9	Copia-7_TA-I	TRUE	TRUE	TRUE	#35978f
9	Copia-89_VV-I	TRUE	TRUE	TRUE	#35978f
9	CR1-15_HM	TRUE	TRUE	TRUE	#35978f
9	CR1-18_NV	TRUE	TRUE	TRUE	#35978f
9	CR1-1_CQ	TRUE	TRUE	TRUE	#35978f
9	CR1-32_HM	TRUE	TRUE	TRUE	#35978f
9	CR1-34_BF	TRUE	TRUE	TRUE	#35978f
9	CR1-64_HM	TRUE	TRUE	TRUE	#35978f
9	CR1-82_HM	TRUE	TRUE	TRUE	#35978f
9	Crack-17_AAe	TRUE	TRUE	TRUE	#35978f
9	CSINE2	TRUE	TRUE	TRUE	#35978f
9	Dada-U6_GA	TRUE	TRUE	TRUE	#35978f
9	Daphne-52_HMa	TRUE	TRUE	TRUE	#35978f
9	DIRS-1_NGr	TRUE	TRUE	TRUE	#35978f
9	DIRS-1_SP	TRUE	TRUE	TRUE	#35978f
9	DIRS-4N1_DR	TRUE	TRUE	TRUE	#35978f
9	DNA2-13_DR	TRUE	TRUE	TRUE	#35978f
9	DNA3-11_CGi	TRUE	TRUE	TRUE	#35978f
9	DNA3-1_STu	TRUE	TRUE	TRUE	#35978f
9	DNA-8-29_DR	TRUE	TRUE	TRUE	#35978f
9	EnSpm-13_ZM	TRUE	TRUE	TRUE	#35978f
9	EnSpm-1_NVi	TRUE	TRUE	TRUE	#35978f
9	ENSPM1_VV	TRUE	TRUE	TRUE	#35978f
9	EnSpm-4_FV	TRUE	TRUE	TRUE	#35978f
9	EnSpm-7_STu	TRUE	TRUE	TRUE	#35978f
9	EnSpm-N1_TD	TRUE	TRUE	TRUE	#35978f
9	ERV3-1_DNo-I	TRUE	TRUE	TRUE	#35978f
9	Galileo_DM	TRUE	TRUE	TRUE	#35978f
9	GYCUME1_LTR	TRUE	TRUE	TRUE	#35978f
9	Gyp_I_MT-int	TRUE	TRUE	TRUE	#35978f
9	Gypsy-10_PBa-LTR	TRUE	TRUE	TRUE	#35978f
9	Gypsy-116-LTR_DR	TRUE	TRUE	TRUE	#35978f
9	Gypsy-137_GM-I	TRUE	TRUE	TRUE	#35978f
9	Gypsy152B-LTR_DR	TRUE	TRUE	TRUE	#35978f
9	Gypsy-208_AA-I	TRUE	TRUE	TRUE	#35978f
9	Gypsy20-LTR_SP	TRUE	TRUE	TRUE	#35978f
9	Gypsy-217_DR-I	TRUE	TRUE	TRUE	#35978f
9	Gypsy-23_PSo-I	TRUE	TRUE	TRUE	#35978f
9	Gypsy-2_PGr-I	TRUE	TRUE	TRUE	#35978f
9	Gypsy47-I_DR	TRUE	TRUE	TRUE	#35978f
9	Gypsy4-I_Dmoj	TRUE	TRUE	TRUE	#35978f
9	Gypsy-4_PPP-I	TRUE	TRUE	TRUE	#35978f
9	Gypsy61-I_DR	TRUE	TRUE	TRUE	#35978f
9	Gypsy-62-I_NV	TRUE	TRUE	TRUE	#35978f
9	Gypsy-6-I_NV	TRUE	TRUE	TRUE	#35978f
9	Gypsy-I_MT	TRUE	TRUE	TRUE	#35978f
9	Harbinger2-2_NV	TRUE	TRUE	TRUE	#35978f
9	Harbinger-2_XT	TRUE	TRUE	TRUE	#35978f
9	Harbinger-7_PGr	TRUE	TRUE	TRUE	#35978f
9	hAT-1_DP	TRUE	TRUE	TRUE	#35978f
9	hAT1_Laf	TRUE	TRUE	TRUE	#35978f
9	hAT-24_DR	TRUE	TRUE	TRUE	#35978f
9	hAT-2_DSe	TRUE	TRUE	TRUE	#35978f
9	HAT-4N3_Mad	TRUE	TRUE	TRUE	#35978f
9	hAT-6_DR	TRUE	TRUE	TRUE	#35978f
9	hATm-12_HM	TRUE	TRUE	TRUE	#35978f
9	hATm-33_HM	TRUE	TRUE	TRUE	#35978f
9	hAT-N1_SP	TRUE	TRUE	TRUE	#35978f
9	hAT-N35C_DR	TRUE	TRUE	TRUE	#35978f
9	hAT-N36B_DR	TRUE	TRUE	TRUE	#35978f
9	Helitron-2N_DW	TRUE	TRUE	TRUE	#35978f
9	Helitron2_PPa	TRUE	TRUE	TRUE	#35978f
9	HelitronN-1_DPe	TRUE	TRUE	TRUE	#35978f
9	Helitron-N2_CGi	TRUE	TRUE	TRUE	#35978f
9	Helitron-N2_DT	TRUE	TRUE	TRUE	#35978f
9	Helitron-N2g_CGi	TRUE	TRUE	TRUE	#35978f
9	HERVFH21-int	TRUE	TRUE	TRUE	#35978f
9	ISL2EU-11_CGi	TRUE	TRUE	TRUE	#35978f
9	ISL2EU-15_CGi	TRUE	TRUE	TRUE	#35978f
9	Jockey-5_DVi	TRUE	TRUE	TRUE	#35978f
9	Kiri-15_AAe	TRUE	TRUE	TRUE	#35978f
9	Kiri-18_AAe	TRUE	TRUE	TRUE	#35978f
9	Kiri-6_AAe	TRUE	TRUE	TRUE	#35978f
9	Kolobok-10N1_CGi	TRUE	TRUE	TRUE	#35978f
9	Kolobok-3_Lch	TRUE	TRUE	TRUE	#35978f
9	L1-15_DR	TRUE	TRUE	TRUE	#35978f
9	L1-3_Tbel	TRUE	TRUE	TRUE	#35978f
9	L1-45_AAe	TRUE	TRUE	TRUE	#35978f
9	L1-64_DR	TRUE	TRUE	TRUE	#35978f
9	L2-16_NVe	TRUE	TRUE	TRUE	#35978f
9	L2-27_ACar	TRUE	TRUE	TRUE	#35978f
9	L2-56_DR	TRUE	TRUE	TRUE	#35978f
9	L2B-4_AAe	TRUE	TRUE	TRUE	#35978f
9	LINE1-15_SBi	TRUE	TRUE	TRUE	#35978f
9	LTR-12B_Crp	TRUE	TRUE	TRUE	#35978f
9	LTR49-int	TRUE	TRUE	TRUE	#35978f
9	LTR53-int	TRUE	TRUE	TRUE	#35978f
9	LTR66	TRUE	TRUE	TRUE	#35978f
9	MamSINE1	TRUE	TRUE	TRUE	#35978f
9	Mariner-36_HM	TRUE	TRUE	TRUE	#35978f
9	Mariner-38B_SIn	TRUE	TRUE	TRUE	#35978f
9	Mariner-79_HSal	TRUE	TRUE	TRUE	#35978f
9	Mariner-N5_DR	TRUE	TRUE	TRUE	#35978f
9	MdoLTR3-int	TRUE	TRUE	TRUE	#35978f
9	Mf3_MF	TRUE	TRUE	TRUE	#35978f
9	MuDR-5_STu	TRUE	TRUE	TRUE	#35978f
9	MuDR-6_GM	TRUE	TRUE	TRUE	#35978f
9	MuDR-8_Mad	TRUE	TRUE	TRUE	#35978f
9	NAVIRTE1	TRUE	TRUE	TRUE	#35978f
9	OposCharlie1	TRUE	TRUE	TRUE	#35978f
9	P-28_HM	TRUE	TRUE	TRUE	#35978f
9	P-35_HM	TRUE	TRUE	TRUE	#35978f
9	P4_AG	TRUE	TRUE	TRUE	#35978f
9	piggyBac-21_SM	TRUE	TRUE	TRUE	#35978f
9	piggyBac-N5_DR	TRUE	TRUE	TRUE	#35978f
9	Polinton-1_CGi	TRUE	TRUE	TRUE	#35978f
9	Polinton-1_GI	TRUE	TRUE	TRUE	#35978f
9	Polinton-1_HM	TRUE	TRUE	TRUE	#35978f
9	Polinton-1_LCh	TRUE	TRUE	TRUE	#35978f
9	Polinton-1_TC	TRUE	TRUE	TRUE	#35978f
9	Polinton-3_HM	TRUE	TRUE	TRUE	#35978f
9	Polinton3_SM	TRUE	TRUE	TRUE	#35978f
9	Polinton-3_SP	TRUE	TRUE	TRUE	#35978f
9	R1-N1_CFl	TRUE	TRUE	TRUE	#35978f
9	REP-2_DF	TRUE	TRUE	TRUE	#35978f
9	RLG_scMaximus_1_8-I	TRUE	TRUE	TRUE	#35978f
9	RLG_scTat_7_1-I	TRUE	TRUE	TRUE	#35978f
9	RMER12	TRUE	TRUE	TRUE	#35978f
9	RTEX-3_NV	TRUE	TRUE	TRUE	#35978f
9	RTEX-4_CGi	TRUE	TRUE	TRUE	#35978f
9	SART-1_LHu	TRUE	TRUE	TRUE	#35978f
9	SAT-13_DR	TRUE	TRUE	TRUE	#35978f
9	SINE2-1_CM	TRUE	TRUE	TRUE	#35978f
9	Sola2-1_EmiHux	TRUE	TRUE	TRUE	#35978f
9	Sola2-3_DPu	TRUE	TRUE	TRUE	#35978f
9	SR2	TRUE	TRUE	TRUE	#35978f
9	TABOR_I-int	TRUE	TRUE	TRUE	#35978f
9	TE-X-1_NVi	TRUE	TRUE	TRUE	#35978f
9	TE-X-7_DR	TRUE	TRUE	TRUE	#35978f
9	Tx1-11_CGi	TRUE	TRUE	TRUE	#35978f
9	Vandal6	TRUE	TRUE	TRUE	#35978f
9	Zisupton-5_DR	TRUE	TRUE	TRUE	#35978f
8	Academ-1_SP	TRUE	TRUE	TRUE	#35978f
8	Academ-2_SP	TRUE	TRUE	TRUE	#35978f
8	ArnoldY1	TRUE	TRUE	TRUE	#35978f
8	ATCopia71_I-int	TRUE	TRUE	TRUE	#35978f
8	ATENSPM2	TRUE	TRUE	TRUE	#35978f
8	ATMU10	TRUE	TRUE	TRUE	#35978f
8	BEL-19_CQ-LTR	TRUE	TRUE	TRUE	#35978f
8	BEL-2-I_NVi	TRUE	TRUE	TRUE	#35978f
8	CACTA-Q	TRUE	TRUE	TRUE	#35978f
8	Chapaev-4_HM	TRUE	TRUE	TRUE	#35978f
8	COPIA1-I_OS	TRUE	TRUE	TRUE	#35978f
8	COPIA2-I_LC	TRUE	TRUE	TRUE	#35978f
8	Copia-37-I_ZM	TRUE	TRUE	TRUE	#35978f
8	Copia-47_VV-I	TRUE	TRUE	TRUE	#35978f
8	Copia-63_GM-I	TRUE	TRUE	TRUE	#35978f
8	CR1-14_BF	TRUE	TRUE	TRUE	#35978f
8	CR1-16_BF	TRUE	TRUE	TRUE	#35978f
8	CR1-1_AG	TRUE	TRUE	TRUE	#35978f
8	CR1-1_BF	TRUE	FALSE	FALSE	#dfc27d
8	CR1-25_HM	TRUE	TRUE	TRUE	#35978f
8	CR1-26_HM	TRUE	TRUE	TRUE	#35978f
8	CR1-2_TCa	TRUE	TRUE	TRUE	#35978f
8	CR1-33_HM	TRUE	TRUE	TRUE	#35978f
8	CR1-49_HM	TRUE	TRUE	TRUE	#35978f
8	CR1-62_HM	TRUE	TRUE	TRUE	#35978f
8	CR1-6_HM	TRUE	TRUE	TRUE	#35978f
8	CR1-87_HM	TRUE	TRUE	TRUE	#35978f
8	CR1-X3_Pass	TRUE	TRUE	TRUE	#35978f
8	Crack-2_BF	TRUE	TRUE	TRUE	#35978f
8	Daphne-21_HMa	TRUE	TRUE	TRUE	#35978f
8	Daphne-2_NV	TRUE	TRUE	TRUE	#35978f
8	Daphne-78_HMa	TRUE	TRUE	TRUE	#35978f
8	DINOLT1	TRUE	TRUE	TRUE	#35978f
8	DIRS-15_DR	TRUE	TRUE	TRUE	#35978f
8	DIRS-6B_DR	TRUE	TRUE	TRUE	#35978f
8	DNA2-14_DR	TRUE	TRUE	TRUE	#35978f
8	DNA4-26_CGi	TRUE	TRUE	TRUE	#35978f
8	DNA4-4B_CGi	TRUE	TRUE	TRUE	#35978f
8	DNA-5-2_DR	TRUE	TRUE	TRUE	#35978f
8	DNA6-2_DR	TRUE	TRUE	TRUE	#35978f
8	DNA-6-2_NV	TRUE	TRUE	TRUE	#35978f
8	DNA9-3C_Mad	TRUE	TRUE	TRUE	#35978f
8	DNAX-25_DR	TRUE	TRUE	TRUE	#35978f
8	EnSpm-10N1_DR	TRUE	TRUE	TRUE	#35978f
8	EnSpm-12_ZM	TRUE	TRUE	TRUE	#35978f
8	EnSpm-13_OS	TRUE	TRUE	TRUE	#35978f
8	EnSpm-18_SBi	TRUE	TRUE	TRUE	#35978f
8	EnSpm-1_STu	TRUE	TRUE	TRUE	#35978f
8	EnSpm-2_TM	TRUE	TRUE	TRUE	#35978f
8	EnSpm-38_SBi	TRUE	TRUE	TRUE	#35978f
8	EnSpm-3_NVe	TRUE	TRUE	TRUE	#35978f
8	EnSpm-3_VV	TRUE	TRUE	TRUE	#35978f
8	ENSPM6_OS	TRUE	TRUE	TRUE	#35978f
8	EnSpm-N1_AT	TRUE	TRUE	TRUE	#35978f
8	ERV2-1-I_Opr	TRUE	TRUE	TRUE	#35978f
8	ERV24_MD_I-int	TRUE	TRUE	TRUE	#35978f
8	ERV25_MD_I-int	TRUE	TRUE	TRUE	#35978f
8	ERV6_MD_I-int	TRUE	TRUE	TRUE	#35978f
8	GGERVL-C-int	TRUE	TRUE	TRUE	#35978f
8	Gypsy10-I_AG	TRUE	TRUE	TRUE	#35978f
8	Gypsy-10_PAb-I	TRUE	TRUE	TRUE	#35978f
8	Gypsy-12_Adi-I	TRUE	FALSE	FALSE	#dfc27d
8	Gypsy-133_GM-I	TRUE	TRUE	TRUE	#35978f
8	Gypsy134-LTR_DR	TRUE	TRUE	TRUE	#35978f
8	Gypsy-13_CGi-I	TRUE	TRUE	TRUE	#35978f
8	Gypsy-15-I_NV	TRUE	TRUE	TRUE	#35978f
8	Gypsy15-I_SP	TRUE	TRUE	TRUE	#35978f
8	Gypsy-16_DPu-I	TRUE	TRUE	TRUE	#35978f
8	Gypsy-172_AA-I	TRUE	TRUE	TRUE	#35978f
8	Gypsy-185_ZM-I	TRUE	TRUE	TRUE	#35978f
8	Gypsy-18A_SB-I	TRUE	TRUE	TRUE	#35978f
8	Gypsy-1_ARO-I	TRUE	TRUE	TRUE	#35978f
8	Gypsy1-I_Dmoj	TRUE	TRUE	TRUE	#35978f
8	Gypsy-1_RP-LTR	TRUE	TRUE	TRUE	#35978f
8	Gypsy-22_DPu-I	TRUE	TRUE	TRUE	#35978f
8	Gypsy-22-LTR_DR	TRUE	TRUE	TRUE	#35978f
8	Gypsy-31_DEl-I	TRUE	TRUE	TRUE	#35978f
8	Gypsy-32_ADe-I	TRUE	TRUE	TRUE	#35978f
8	Gypsy-37_NVi-I	TRUE	TRUE	TRUE	#35978f
8	Gypsy-41_DEl-I	TRUE	TRUE	TRUE	#35978f
8	Gypsy-46_CGi-I	TRUE	TRUE	TRUE	#35978f
8	Gypsy-50_PIT-I	TRUE	TRUE	TRUE	#35978f
8	Gypsy-52_BG-I	TRUE	TRUE	TRUE	#35978f
8	Gypsy-5_DKi-I	TRUE	TRUE	TRUE	#35978f
8	Gypsy-5_PX-I	TRUE	TRUE	TRUE	#35978f
8	Gypsy-64_BG-I	TRUE	TRUE	TRUE	#35978f
8	Gypsy-66_PAb-I	TRUE	TRUE	TRUE	#35978f
8	Gypsy6-LTR_AP	TRUE	TRUE	TRUE	#35978f
8	Gypsy-71_BG-I	TRUE	TRUE	TRUE	#35978f
8	Gypsy-88_CQ-I	TRUE	TRUE	TRUE	#35978f
8	HAL1-1D_Tbel	TRUE	TRUE	TRUE	#35978f
8	Harbinger-1_NV	TRUE	FALSE	FALSE	#dfc27d
8	Harbinger-21_PGr	TRUE	TRUE	TRUE	#35978f
8	Harbinger-5_PSt	TRUE	TRUE	TRUE	#35978f
8	hAT-10_DR	TRUE	TRUE	TRUE	#35978f
8	HAT13_CB	TRUE	TRUE	TRUE	#35978f
8	hAT-16_HM	TRUE	TRUE	TRUE	#35978f
8	hAT-208_Ami	TRUE	TRUE	TRUE	#35978f
8	hAT-23_HM	TRUE	TRUE	TRUE	#35978f
8	hAT-27_HM	TRUE	TRUE	TRUE	#35978f
8	hAT-3_LCh	TRUE	TRUE	TRUE	#35978f
8	hAT-82_HMa	TRUE	TRUE	TRUE	#35978f
8	HAT-8_Mad	TRUE	TRUE	TRUE	#35978f
8	hATm-50_HM	TRUE	TRUE	TRUE	#35978f
8	hAT-N16_Crp	TRUE	TRUE	TRUE	#35978f
8	hAT-N35B_DR	TRUE	TRUE	TRUE	#35978f
8	hATx-4_SM	TRUE	TRUE	TRUE	#35978f
8	Helitron-2_Mad	TRUE	TRUE	TRUE	#35978f
8	HELITRON4_OS	TRUE	TRUE	TRUE	#35978f
8	Helitron-8_CGi	TRUE	TRUE	TRUE	#35978f
8	Helitron-N12_CGi	TRUE	TRUE	TRUE	#35978f
8	Helitron-N21_CGi	TRUE	TRUE	TRUE	#35978f
8	Helitron-N46_CGi	TRUE	TRUE	TRUE	#35978f
8	HelitronY1A_CE	TRUE	TRUE	TRUE	#35978f
8	HELMET4	TRUE	TRUE	TRUE	#35978f
8	HERVIP10FH-int	TRUE	TRUE	TRUE	#35978f
8	Hoana5	TRUE	TRUE	TRUE	#35978f
8	IS3EU-4N_DR	TRUE	TRUE	TRUE	#35978f
8	IS4EU-1_NV	TRUE	TRUE	TRUE	#35978f
8	ISL2EU-18_CGi	TRUE	TRUE	TRUE	#35978f
8	ISL2EU-7_CGi	TRUE	TRUE	TRUE	#35978f
8	Jockey-5_DPer	TRUE	TRUE	TRUE	#35978f
8	Kiri-19_AAe	TRUE	FALSE	FALSE	#dfc27d
8	Kiri-30_AAe	TRUE	TRUE	TRUE	#35978f
8	Kiri-32_AAe	TRUE	TRUE	TRUE	#35978f
8	Kiri-3_CQ	TRUE	TRUE	TRUE	#35978f
8	Kolobok-3_AQu	TRUE	TRUE	TRUE	#35978f
8	L1-58_ACar	TRUE	TRUE	TRUE	#35978f
8	L1-8_CR	TRUE	TRUE	TRUE	#35978f
8	L1_Mdo4	TRUE	TRUE	TRUE	#35978f
8	L2-22_ACar	TRUE	TRUE	TRUE	#35978f
8	L2-2_NVi	TRUE	TRUE	TRUE	#35978f
8	L2-4_Cis	TRUE	TRUE	TRUE	#35978f
8	LONGPAL1	TRUE	TRUE	TRUE	#35978f
8	LTR-83_Gav	TRUE	TRUE	TRUE	#35978f
8	Lx10	TRUE	TRUE	TRUE	#35978f
8	Mariner-101_HSal	TRUE	TRUE	TRUE	#35978f
8	Mariner-11_LCh	TRUE	TRUE	TRUE	#35978f
8	Mariner3-3_HSal	TRUE	TRUE	TRUE	#35978f
8	Mariner-N6_PM	TRUE	TRUE	TRUE	#35978f
8	Maui	TRUE	TRUE	TRUE	#35978f
8	MAX_I-int	TRUE	TRUE	TRUE	#35978f
8	Merlin-1_Aplcal	TRUE	TRUE	TRUE	#35978f
8	MERMITE18F	TRUE	TRUE	TRUE	#35978f
8	MuDR-11N_VV	TRUE	TRUE	TRUE	#35978f
8	MuDR-7_VV	TRUE	TRUE	TRUE	#35978f
8	Ogre-PT1_I-int	TRUE	TRUE	TRUE	#35978f
8	ONSATB	TRUE	TRUE	TRUE	#35978f
8	OSMUD1	TRUE	TRUE	TRUE	#35978f
8	Outcast	TRUE	TRUE	TRUE	#35978f
8	piggyBac-2_XT	TRUE	TRUE	TRUE	#35978f
8	piggyBac-4_BF	TRUE	FALSE	FALSE	#dfc27d
8	PIVE	TRUE	TRUE	TRUE	#35978f
8	Polinton-1_CB	TRUE	TRUE	TRUE	#35978f
8	Polinton-1_NV	TRUE	FALSE	FALSE	#dfc27d
8	Polinton-2N1_DR	TRUE	TRUE	TRUE	#35978f
8	Polinton2_SM	TRUE	TRUE	TRUE	#35978f
8	Polinton-3_NV	TRUE	TRUE	TRUE	#35978f
8	Polinton-4_NVi	TRUE	TRUE	TRUE	#35978f
8	RLG_scMaximus_1_5-I	TRUE	TRUE	TRUE	#35978f
8	RLG_scMaximus_2_1-I	TRUE	TRUE	TRUE	#35978f
8	RMER17D	TRUE	TRUE	TRUE	#35978f
8	RNSAT1a	TRUE	TRUE	TRUE	#35978f
8	RTEX-2_NV	TRUE	TRUE	TRUE	#35978f
8	SAT-7_DR	TRUE	TRUE	TRUE	#35978f
8	SAT_PL	TRUE	TRUE	TRUE	#35978f
8	SHALINE2_MT	TRUE	TRUE	TRUE	#35978f
8	SHAMUDRA3_MT	TRUE	TRUE	TRUE	#35978f
8	SINE2-1_Pca	TRUE	TRUE	TRUE	#35978f
8	SINEC_old	TRUE	TRUE	TRUE	#35978f
8	Sola3-1_EmiHux	TRUE	TRUE	TRUE	#35978f
8	SR2A	TRUE	TRUE	TRUE	#35978f
8	SUKKULA2_HV-LTR	TRUE	TRUE	TRUE	#35978f
8	Transib-16_HM	TRUE	TRUE	TRUE	#35978f
8	Tx1-2_DR	TRUE	TRUE	TRUE	#35978f
8	U1	TRUE	FALSE	FALSE	#dfc27d
8	Vandal8	TRUE	TRUE	TRUE	#35978f
8	Ves2B_ML	TRUE	TRUE	TRUE	#35978f
7	7SLRNA	TRUE	FALSE	FALSE	#dfc27d
7	Academ-1_ADi	TRUE	FALSE	FALSE	#dfc27d
7	Academ-1_CGi	TRUE	TRUE	TRUE	#35978f
7	Academ-2_ADi	TRUE	TRUE	TRUE	#35978f
7	Academ-2_HM	TRUE	TRUE	TRUE	#35978f
7	Academ-3_ADi	TRUE	TRUE	TRUE	#35978f
7	Academ-3_Aplcal	TRUE	TRUE	TRUE	#35978f
7	Academ-3_SK	TRUE	TRUE	TRUE	#35978f
7	Academ-5_SP	TRUE	TRUE	TRUE	#35978f
7	Academ-8_SK	TRUE	FALSE	FALSE	#dfc27d
7	Ambal-3N1_FCy	TRUE	TRUE	TRUE	#35978f
7	Arnold2	TRUE	TRUE	TRUE	#35978f
7	Arnold3	TRUE	TRUE	TRUE	#35978f
7	ATCopia28_I-int	TRUE	TRUE	TRUE	#35978f
7	ATENSPM5	TRUE	TRUE	TRUE	#35978f
7	ATMU5	TRUE	TRUE	TRUE	#35978f
7	ATMU8	TRUE	TRUE	TRUE	#35978f
7	ATREP18	TRUE	TRUE	TRUE	#35978f
7	BEL-10_DBp-I	TRUE	TRUE	TRUE	#35978f
7	BEL-10_DEl-I	TRUE	TRUE	TRUE	#35978f
7	BEL-15_DPu-I	TRUE	TRUE	TRUE	#35978f
7	BEL1-I_Dya	TRUE	TRUE	TRUE	#35978f
7	BEL-1-LTR_NVi	TRUE	TRUE	TRUE	#35978f
7	BEL-21_DAn-I	TRUE	TRUE	TRUE	#35978f
7	BEL-22_DTa-I	TRUE	TRUE	TRUE	#35978f
7	BEL-41_DRe-I	TRUE	TRUE	TRUE	#35978f
7	BEL-4_SI-I	TRUE	TRUE	TRUE	#35978f
7	BovB_PMo	TRUE	TRUE	TRUE	#35978f
7	CANDYSTRIPE1_SB	TRUE	TRUE	TRUE	#35978f
7	Caulimovirus-1_VVi	TRUE	TRUE	TRUE	#35978f
7	CLOUD-4	TRUE	TRUE	TRUE	#35978f
7	Copia-10_TC-I	TRUE	TRUE	TRUE	#35978f
7	Copia-141_SB-I	TRUE	TRUE	TRUE	#35978f
7	Copia-14_LH-I	TRUE	TRUE	TRUE	#35978f
7	Copia15-VV_I-int	TRUE	TRUE	TRUE	#35978f
7	Copia-1_PAb-I	TRUE	TRUE	TRUE	#35978f
7	Copia-1_RP-LTR	TRUE	TRUE	TRUE	#35978f
7	Copia-24_PAb-I	TRUE	TRUE	TRUE	#35978f
7	Copia-2_Adi-I	TRUE	TRUE	TRUE	#35978f
7	Copia-2_PPa-I	TRUE	TRUE	TRUE	#35978f
7	Copia-34_DPu-I	TRUE	TRUE	TRUE	#35978f
7	Copia-39_Pru-I	TRUE	TRUE	TRUE	#35978f
7	Copia-4_DMoj-I	TRUE	TRUE	TRUE	#35978f
7	Copia-50_BG-I	TRUE	TRUE	TRUE	#35978f
7	Copia5-SB_I-int	TRUE	TRUE	TRUE	#35978f
7	Copia-71_MLP-I	TRUE	TRUE	TRUE	#35978f
7	Copia-7_DAn-I	TRUE	TRUE	TRUE	#35978f
7	CR1-12_CGi	TRUE	TRUE	TRUE	#35978f
7	CR1-15_BF	TRUE	FALSE	FALSE	#dfc27d
7	CR1-17_HM	TRUE	TRUE	TRUE	#35978f
7	CR1-20_BF	TRUE	TRUE	TRUE	#35978f
7	CR1-20_CQ	TRUE	TRUE	TRUE	#35978f
7	CR1-21_NV	TRUE	TRUE	TRUE	#35978f
7	CR1-23_HM	TRUE	TRUE	TRUE	#35978f
7	CR1-27_HM	TRUE	TRUE	TRUE	#35978f
7	CR1-2_LCh	TRUE	TRUE	TRUE	#35978f
7	CR1-3c_LCh	TRUE	TRUE	TRUE	#35978f
7	CR1-4_CGi	TRUE	TRUE	TRUE	#35978f
7	CR1-4_HM	TRUE	FALSE	FALSE	#dfc27d
7	CR1-51_DR	TRUE	TRUE	TRUE	#35978f
7	CR1-54_HM	TRUE	TRUE	TRUE	#35978f
7	CR1-5_CGi	TRUE	TRUE	TRUE	#35978f
7	CR1-70_HM	TRUE	TRUE	TRUE	#35978f
7	CR1-7_SP	TRUE	FALSE	FALSE	#dfc27d
7	CR1-8_DTa	TRUE	TRUE	TRUE	#35978f
7	CR1-8_SP	TRUE	FALSE	FALSE	#dfc27d
7	CR1-9_NV	TRUE	TRUE	TRUE	#35978f
7	Crack-10_BF	TRUE	TRUE	TRUE	#35978f
7	Crack-11_AAe	TRUE	TRUE	TRUE	#35978f
7	Crack-11_BF	TRUE	FALSE	FALSE	#dfc27d
7	Crack-17_BF	TRUE	FALSE	FALSE	#dfc27d
7	Crack-21_AAe	TRUE	TRUE	TRUE	#35978f
7	Crack-21_BF	TRUE	TRUE	TRUE	#35978f
7	Crack-23_BF	TRUE	TRUE	TRUE	#35978f
7	Crack-29_BF	TRUE	FALSE	FALSE	#dfc27d
7	Crack-2_CP	TRUE	TRUE	TRUE	#35978f
7	Crack-2_HM	TRUE	TRUE	TRUE	#35978f
7	Crack-2_NV	TRUE	TRUE	TRUE	#35978f
7	Crack-3_BF	TRUE	FALSE	FALSE	#dfc27d
7	Crack-6_BF	TRUE	FALSE	FALSE	#dfc27d
7	Crack-8_HMa	TRUE	FALSE	FALSE	#dfc27d
7	Crack-9_BF	TRUE	TRUE	TRUE	#35978f
7	Cre-1_HM	TRUE	TRUE	TRUE	#35978f
7	Crypton-4_CGi	TRUE	TRUE	TRUE	#35978f
7	Dada-1_TN	TRUE	TRUE	TRUE	#35978f
7	Dada-U1A_DR	TRUE	TRUE	TRUE	#35978f
7	DGI_SP	TRUE	TRUE	TRUE	#35978f
7	DIP0	TRUE	TRUE	TRUE	#35978f
7	DIRS-1_BF	TRUE	TRUE	TRUE	#35978f
7	DIRS-1_CR	TRUE	TRUE	TRUE	#35978f
7	DIRS-2_MLP-I	TRUE	TRUE	TRUE	#35978f
7	DIRS-2_NV	TRUE	TRUE	TRUE	#35978f
7	DIRS-5_DR	TRUE	TRUE	TRUE	#35978f
7	DNA-1_CQ	TRUE	TRUE	TRUE	#35978f
7	DNA-2-13_DR	TRUE	TRUE	TRUE	#35978f
7	DNA5-4_CGi	TRUE	TRUE	TRUE	#35978f
7	DNA6-1_SP	TRUE	TRUE	TRUE	#35978f
7	DNA6-8_CGi	TRUE	TRUE	TRUE	#35978f
7	DNA8-12_CB	TRUE	TRUE	TRUE	#35978f
7	DNA-8-36_DR	TRUE	TRUE	TRUE	#35978f
7	DNA8-8_CGi	TRUE	TRUE	TRUE	#35978f
7	DNA9-4_FV	TRUE	TRUE	TRUE	#35978f
7	DNA-X-9_NV	TRUE	TRUE	TRUE	#35978f
7	EnSpm-13_SBi	TRUE	TRUE	TRUE	#35978f
7	EnSpm1n_AT	TRUE	TRUE	TRUE	#35978f
7	EnSpm-21_SBi	TRUE	TRUE	TRUE	#35978f
7	EnSpm-2_BF	TRUE	TRUE	TRUE	#35978f
7	EnSpm-2_STu	TRUE	FALSE	FALSE	#dfc27d
7	EnSpm-35_SBi	TRUE	TRUE	TRUE	#35978f
7	EnSpm-36_SBi	TRUE	TRUE	TRUE	#35978f
7	EnSpm-39_SBi	TRUE	TRUE	TRUE	#35978f
7	EnSpm-3_PGr	TRUE	TRUE	TRUE	#35978f
7	EnSpm-40_SBi	TRUE	TRUE	TRUE	#35978f
7	EnSpm-4_STu	TRUE	TRUE	TRUE	#35978f
7	EnSpm-7_FV	TRUE	TRUE	TRUE	#35978f
7	EnSpm-N18_DR	TRUE	TRUE	TRUE	#35978f
7	EnSpm-N2_TA	TRUE	TRUE	TRUE	#35978f
7	EqERV-beta1-int	TRUE	TRUE	TRUE	#35978f
7	Galileo_DB	TRUE	TRUE	TRUE	#35978f
7	Ginger1-1_DR	TRUE	TRUE	TRUE	#35978f
7	Ginger1-7_HM	TRUE	TRUE	TRUE	#35978f
7	Ginger2-1_HM	TRUE	TRUE	TRUE	#35978f
7	GmCOPIA11_I-int	TRUE	TRUE	TRUE	#35978f
7	Gypsy-106_AA-I	TRUE	FALSE	FALSE	#dfc27d
7	Gypsy-10_Mad-I	TRUE	TRUE	TRUE	#35978f
7	Gypsy-11_CGi-I	TRUE	TRUE	TRUE	#35978f
7	Gypsy-11_FV-I	TRUE	TRUE	TRUE	#35978f
7	Gypsy1-1-I_Lch	TRUE	FALSE	FALSE	#dfc27d
7	Gypsy-125_SBi-LTR	TRUE	TRUE	TRUE	#35978f
7	Gypsy12-VV_I-int	TRUE	TRUE	TRUE	#35978f
7	Gypsy-131_DR-I	TRUE	TRUE	TRUE	#35978f
7	Gypsy-138_SBi-I	TRUE	TRUE	TRUE	#35978f
7	Gypsy-13_CFl-I	TRUE	TRUE	TRUE	#35978f
7	Gypsy13-I_SP	TRUE	TRUE	TRUE	#35978f
7	Gypsy140-I_DR	TRUE	TRUE	TRUE	#35978f
7	Gypsy-14_LCh-I	TRUE	TRUE	TRUE	#35978f
7	Gypsy150-I_DR	TRUE	TRUE	TRUE	#35978f
7	Gypsy-151_AA-I	TRUE	TRUE	TRUE	#35978f
7	Gypsy-15_DRh-I	TRUE	TRUE	TRUE	#35978f
7	Gypsy-15_FV-I	TRUE	TRUE	TRUE	#35978f
7	Gypsy-16-I_NVi	TRUE	TRUE	TRUE	#35978f
7	Gypsy-16_OD-I	TRUE	TRUE	TRUE	#35978f
7	Gypsy-17_LCh-I	TRUE	TRUE	TRUE	#35978f
7	Gypsy-17_XT-I	TRUE	FALSE	FALSE	#dfc27d
7	Gypsy-18_DBp-I	TRUE	TRUE	TRUE	#35978f
7	Gypsy-20_CPB-I	TRUE	TRUE	TRUE	#35978f
7	Gypsy-20_CSa-I	TRUE	TRUE	TRUE	#35978f
7	Gypsy-20-I_NVi	TRUE	TRUE	TRUE	#35978f
7	Gypsy-20_LBS-I	TRUE	TRUE	TRUE	#35978f
7	Gypsy21-I_SP	TRUE	TRUE	TRUE	#35978f
7	Gypsy-230_DR-LTR	TRUE	TRUE	TRUE	#35978f
7	Gypsy-23-LTR_DR	TRUE	TRUE	TRUE	#35978f
7	Gypsy-24_XT-I	TRUE	TRUE	TRUE	#35978f
7	Gypsy-26_VV-I	TRUE	TRUE	TRUE	#35978f
7	Gypsy-27_DP-I	TRUE	TRUE	TRUE	#35978f
7	Gypsy-28_DYa-I	TRUE	TRUE	TRUE	#35978f
7	Gypsy-29_CGi-I	TRUE	TRUE	TRUE	#35978f
7	Gypsy-2_DPer-I	TRUE	TRUE	TRUE	#35978f
7	Gypsy-2_DRh-I	TRUE	TRUE	TRUE	#35978f
7	Gypsy-31-I_NVi	TRUE	TRUE	TRUE	#35978f
7	Gypsy-32_CGi-I	TRUE	TRUE	TRUE	#35978f
7	Gypsy-34_Mad-I	TRUE	TRUE	TRUE	#35978f
7	Gypsy-3_Adi-I	TRUE	FALSE	FALSE	#dfc27d
7	Gypsy-3_CSa-I	TRUE	TRUE	TRUE	#35978f
7	Gypsy45-I_AG	TRUE	TRUE	TRUE	#35978f
7	Gypsy-46-I_NV	TRUE	FALSE	FALSE	#dfc27d
7	Gypsy4-SB_I-int	TRUE	TRUE	TRUE	#35978f
7	Gypsy-51_GA-LTR	TRUE	TRUE	TRUE	#35978f
7	Gypsy-55-I_NV	TRUE	TRUE	TRUE	#35978f
7	Gypsy58-I_DR	TRUE	TRUE	TRUE	#35978f
7	Gypsy-5_DBp-I	TRUE	TRUE	TRUE	#35978f
7	Gypsy-5_DPu-I	TRUE	TRUE	TRUE	#35978f
7	Gypsy-5_DWil-I	TRUE	TRUE	TRUE	#35978f
7	Gypsy-6_AEc-I	TRUE	TRUE	TRUE	#35978f
7	Gypsy77-I_DR	TRUE	TRUE	TRUE	#35978f
7	Gypsy-78_MLP-I	TRUE	TRUE	TRUE	#35978f
7	Gypsy79-I_DR	TRUE	TRUE	TRUE	#35978f
7	Gypsy-7_CFl-I	TRUE	TRUE	TRUE	#35978f
7	Gypsy-7_CPB-I	TRUE	TRUE	TRUE	#35978f
7	Gypsy-7-I_NV	TRUE	TRUE	TRUE	#35978f
7	Gypsy-8_DFi-I	TRUE	TRUE	TRUE	#35978f
7	Gypsy-8_DMoj-I	TRUE	TRUE	TRUE	#35978f
7	Gypsy92-I_DR	TRUE	FALSE	FALSE	#dfc27d
7	Harbinger	TRUE	TRUE	TRUE	#35978f
7	Harbinger-10_PGr	TRUE	TRUE	TRUE	#35978f
7	Harbinger2-1_ES	TRUE	TRUE	TRUE	#35978f
7	Harbinger-3_SPur	TRUE	FALSE	FALSE	#dfc27d
7	Harbinger-N15_DR	TRUE	TRUE	TRUE	#35978f
7	Harbinger-N2_SP	TRUE	TRUE	TRUE	#35978f
7	hAT-16N2_LMi	TRUE	TRUE	TRUE	#35978f
7	hAT-17B_Croc	TRUE	TRUE	TRUE	#35978f
7	hAT-18_LCh	TRUE	TRUE	TRUE	#35978f
7	hAT-35_LCh	TRUE	TRUE	TRUE	#35978f
7	hAT-5_GM	TRUE	TRUE	TRUE	#35978f
7	hAT6-1_NV	TRUE	TRUE	TRUE	#35978f
7	hAT-7_CPB	TRUE	TRUE	TRUE	#35978f
7	hAT-N14_SBi	TRUE	TRUE	TRUE	#35978f
7	hATw-2_SP	TRUE	TRUE	TRUE	#35978f
7	Helitron-1_AEc	TRUE	TRUE	TRUE	#35978f
7	Helitron1_PPa	TRUE	TRUE	TRUE	#35978f
7	Helitron-2_CGi	TRUE	TRUE	TRUE	#35978f
7	Helitron-3_CGi	TRUE	TRUE	TRUE	#35978f
7	Helitron4	TRUE	TRUE	TRUE	#35978f
7	Helitron-5_DR	TRUE	TRUE	TRUE	#35978f
7	Helitron-N17B_CGi	TRUE	TRUE	TRUE	#35978f
7	Helitron-N18_CGi	TRUE	TRUE	TRUE	#35978f
7	Helitron-N1_SP	TRUE	TRUE	TRUE	#35978f
7	Helitron-N2B_CGi	TRUE	TRUE	TRUE	#35978f
7	Helitron-N3_PBa	TRUE	TRUE	TRUE	#35978f
7	Helitron-N8_NV	TRUE	TRUE	TRUE	#35978f
7	HelitronY1B	TRUE	TRUE	TRUE	#35978f
7	HelitronY1D	TRUE	TRUE	TRUE	#35978f
7	HELMET2	TRUE	TRUE	TRUE	#35978f
7	HERVK13-int	TRUE	FALSE	FALSE	#dfc27d
7	I-4_AC	TRUE	TRUE	TRUE	#35978f
7	IS3EU-2N1_CGi	TRUE	TRUE	TRUE	#35978f
7	IS3EU-N2_CGi	TRUE	TRUE	TRUE	#35978f
7	ISL2EU-1_HM	TRUE	TRUE	TRUE	#35978f
7	Jockey-6_DF	TRUE	TRUE	TRUE	#35978f
7	Jockey-9_DPer	TRUE	TRUE	TRUE	#35978f
7	Kiri-10_AAe	TRUE	TRUE	TRUE	#35978f
7	Kiri-29_AAe	TRUE	TRUE	TRUE	#35978f
7	Kolobok-1_NV	TRUE	TRUE	TRUE	#35978f
7	Kolobok-2_AQu	TRUE	FALSE	FALSE	#dfc27d
7	Kolobok-4_AQu	TRUE	FALSE	FALSE	#dfc27d
7	L1-13_GM	TRUE	TRUE	TRUE	#35978f
7	L1-19_DR	TRUE	TRUE	TRUE	#35978f
7	L1-1B_Opr	TRUE	TRUE	TRUE	#35978f
7	L1-21B_ACar	TRUE	TRUE	TRUE	#35978f
7	L1-2_EE	TRUE	TRUE	TRUE	#35978f
7	L1-3_NV	TRUE	TRUE	TRUE	#35978f
7	L1-3_VC	TRUE	TRUE	TRUE	#35978f
7	L1_AC_13	TRUE	TRUE	TRUE	#35978f
7	L1MC4	TRUE	TRUE	TRUE	#35978f
7	L2-1b_Cis	TRUE	FALSE	FALSE	#dfc27d
7	L2-1c_Cis	TRUE	TRUE	TRUE	#35978f
7	L2-3_Cis	TRUE	FALSE	FALSE	#dfc27d
7	L2-9_NVi	TRUE	TRUE	TRUE	#35978f
7	L2_AC_10	TRUE	TRUE	TRUE	#35978f
7	L2_AC_15	TRUE	TRUE	TRUE	#35978f
7	L2_AC_16	TRUE	TRUE	TRUE	#35978f
7	LTR11_Ami	TRUE	TRUE	TRUE	#35978f
7	LTR127_MD	TRUE	TRUE	TRUE	#35978f
7	LTR1420_EC	TRUE	TRUE	TRUE	#35978f
7	LTR18D_ML	TRUE	TRUE	TRUE	#35978f
7	Mariner-68_HSal	TRUE	TRUE	TRUE	#35978f
7	Mariner-91_HSal	TRUE	TRUE	TRUE	#35978f
7	MarinerL-1_CR	TRUE	TRUE	TRUE	#35978f
7	MINISAT7_CB	TRUE	TRUE	TRUE	#35978f
7	MMSAT4	TRUE	FALSE	FALSE	#dfc27d
7	MuDR-22_VV	TRUE	TRUE	TRUE	#35978f
7	MuDR-2_FV	TRUE	TRUE	TRUE	#35978f
7	MuDR-3_STu	TRUE	TRUE	TRUE	#35978f
7	MuDR-4_EPa	TRUE	TRUE	TRUE	#35978f
7	MuDR-5_OS	TRUE	TRUE	TRUE	#35978f
7	MuDR-6_FV	TRUE	TRUE	TRUE	#35978f
7	MuDR-8_ZM	TRUE	TRUE	TRUE	#35978f
7	MuDR-9_SBi	TRUE	TRUE	TRUE	#35978f
7	MuSHAN_MT	TRUE	TRUE	TRUE	#35978f
7	NERV5_MD_I-int	TRUE	TRUE	TRUE	#35978f
7	Ogre-PT3_I-int	TRUE	TRUE	TRUE	#35978f
7	OSMU6	TRUE	TRUE	TRUE	#35978f
7	P-1_PBa	TRUE	TRUE	TRUE	#35978f
7	P-2_PBa	TRUE	TRUE	TRUE	#35978f
7	P7SL_Cpo	TRUE	FALSE	FALSE	#dfc27d
7	Penelope-3_NV	TRUE	TRUE	TRUE	#35978f
7	Perere-3	TRUE	FALSE	FALSE	#dfc27d
7	PiggyBac-1_EmiHux	TRUE	TRUE	TRUE	#35978f
7	piggyBac-N6_SP	TRUE	TRUE	TRUE	#35978f
7	PlatLTR35a-int	TRUE	TRUE	TRUE	#35978f
7	Polinton-1_DEu	TRUE	TRUE	TRUE	#35978f
7	Polinton-1_DK	TRUE	TRUE	TRUE	#35978f
7	Polinton-1_SPU	TRUE	TRUE	TRUE	#35978f
7	Polinton-2_DBi	TRUE	TRUE	TRUE	#35978f
7	Polinton-4_NV	TRUE	TRUE	TRUE	#35978f
7	Polinton-N1B_NV	TRUE	TRUE	TRUE	#35978f
7	Proto1-3_NG	TRUE	TRUE	TRUE	#35978f
7	R1_DPs	TRUE	TRUE	TRUE	#35978f
7	RLG_scMaximus_1_3-I	TRUE	TRUE	TRUE	#35978f
7	RLG_scMaximus_1_4-I	TRUE	TRUE	TRUE	#35978f
7	RLG_scTat_2_1-I	TRUE	TRUE	TRUE	#35978f
7	RN10_I-int	TRUE	TRUE	TRUE	#35978f
7	RP5S	TRUE	TRUE	TRUE	#35978f
7	RTEX-12_ACar	TRUE	TRUE	TRUE	#35978f
7	RTEX-14_CGi	TRUE	TRUE	TRUE	#35978f
7	RTEX-17_SK	TRUE	TRUE	TRUE	#35978f
7	RTEX-1_NV	TRUE	TRUE	TRUE	#35978f
7	RTEX-1_SK	TRUE	TRUE	TRUE	#35978f
7	RTEX-4_SK	TRUE	FALSE	FALSE	#dfc27d
7	RTEX-5_DR	TRUE	FALSE	FALSE	#dfc27d
7	RTEX-5_SK	TRUE	TRUE	TRUE	#35978f
7	RTEX-7_SK	TRUE	TRUE	TRUE	#35978f
7	SAT-17_DR	TRUE	TRUE	TRUE	#35978f
7	SAT-19_DR	TRUE	TRUE	TRUE	#35978f
7	SAT-1_AMi	TRUE	TRUE	TRUE	#35978f
7	SINE2-2_SP	TRUE	FALSE	FALSE	#dfc27d
7	Sola1-1_ACas	TRUE	TRUE	TRUE	#35978f
7	Sola1-1_FraCyl	TRUE	TRUE	TRUE	#35978f
7	Sola2-1_NV	TRUE	TRUE	TRUE	#35978f
7	Sola2-1_SP	TRUE	TRUE	TRUE	#35978f
7	Sola3-1_AA	TRUE	TRUE	TRUE	#35978f
7	SZ-52_int-int	TRUE	TRUE	TRUE	#35978f
7	Tad1-43_BG	TRUE	TRUE	TRUE	#35978f
7	Tad1-60_BG	TRUE	TRUE	TRUE	#35978f
7	TART-A	TRUE	TRUE	TRUE	#35978f
7	TE-3_NV	TRUE	TRUE	TRUE	#35978f
7	TIRANT_I-int	TRUE	TRUE	TRUE	#35978f
7	TRNALysTTT_CB	TRUE	TRUE	TRUE	#35978f
7	Tx1-10_Crp	TRUE	TRUE	TRUE	#35978f
7	Tx1-12_Crp	TRUE	TRUE	TRUE	#35978f
7	Tx1-13_CGi	TRUE	TRUE	TRUE	#35978f
7	Tx1-1_ADi	TRUE	TRUE	TRUE	#35978f
7	Tx1-8_SK	TRUE	TRUE	TRUE	#35978f
7	U1_LV	TRUE	TRUE	TRUE	#35978f
7	UVIR_DV	TRUE	TRUE	TRUE	#35978f
7	Vandal20	TRUE	TRUE	TRUE	#35978f
7	Vandal22	TRUE	TRUE	TRUE	#35978f
7	Waldo-3_AAe	TRUE	TRUE	TRUE	#35978f
6	AC9_ZM	TRUE	TRUE	TRUE	#35978f
6	Academ-1_AMi	TRUE	FALSE	FALSE	#dfc27d
6	Academ-3_HM	TRUE	TRUE	TRUE	#35978f
6	ACCORD_LTR	TRUE	TRUE	TRUE	#35978f
6	ALPINE1B	TRUE	TRUE	TRUE	#35978f
6	ArnoldY2	TRUE	TRUE	TRUE	#35978f
6	ATCopia6I	TRUE	TRUE	TRUE	#35978f
6	ATCopia80_I-int	TRUE	TRUE	TRUE	#35978f
6	ATENSPM6	TRUE	TRUE	TRUE	#35978f
6	ATGP3I	TRUE	FALSE	FALSE	#dfc27d
6	BEL-11_DEl-I	TRUE	TRUE	TRUE	#35978f
6	BEL-11-I_NV	TRUE	TRUE	TRUE	#35978f
6	BEL-155_AA-LTR	TRUE	TRUE	TRUE	#35978f
6	BEL-1_AEc-I	TRUE	TRUE	TRUE	#35978f
6	BEL-1_DPer-I	TRUE	TRUE	TRUE	#35978f
6	BEL-1_DWil-I	TRUE	TRUE	TRUE	#35978f
6	BEL-227_AA-I	TRUE	TRUE	TRUE	#35978f
6	BEL24-I_DR	TRUE	FALSE	FALSE	#dfc27d
6	BEL27-I_DR	TRUE	FALSE	FALSE	#dfc27d
6	BEL-2_DPu-I	TRUE	TRUE	TRUE	#35978f
6	BEL-2_GA-I	TRUE	FALSE	FALSE	#dfc27d
6	BEL31-I_DR	TRUE	FALSE	FALSE	#dfc27d
6	BEL3_DM-I	TRUE	TRUE	TRUE	#35978f
6	BEL-3_GA-I	TRUE	TRUE	TRUE	#35978f
6	BEL-3-I_NV	TRUE	FALSE	FALSE	#dfc27d
6	BEL-58_DRe-I	TRUE	TRUE	TRUE	#35978f
6	BEL5-I_DR	TRUE	FALSE	FALSE	#dfc27d
6	BEL-61_DRe-I	TRUE	TRUE	TRUE	#35978f
6	BEL-646_AA-I	TRUE	TRUE	TRUE	#35978f
6	BEL-8_DPu-I	TRUE	FALSE	FALSE	#dfc27d
6	BEL8-I_DR	TRUE	TRUE	TRUE	#35978f
6	BEL-9_NV-I	TRUE	TRUE	TRUE	#35978f
6	BovB_Ma	TRUE	TRUE	TRUE	#35978f
6	BovB_Me	TRUE	TRUE	TRUE	#35978f
6	CarLTR1-int	TRUE	TRUE	TRUE	#35978f
6	Caulimovirus-1_PTr	TRUE	TRUE	TRUE	#35978f
6	CeRep54	TRUE	TRUE	TRUE	#35978f
6	Chapaev-2_BF	TRUE	FALSE	FALSE	#dfc27d
6	CiL2	TRUE	TRUE	TRUE	#35978f
6	COP20_I_MT-int	TRUE	TRUE	TRUE	#35978f
6	Copia-104_GM-I	TRUE	TRUE	TRUE	#35978f
6	Copia-10_SB-I	TRUE	TRUE	TRUE	#35978f
6	Copia-11_CQ-I	TRUE	TRUE	TRUE	#35978f
6	Copia-15_FV-I	TRUE	TRUE	TRUE	#35978f
6	Copia1-I_DM	TRUE	TRUE	TRUE	#35978f
6	Copia1-PTR_I-int	TRUE	TRUE	TRUE	#35978f
6	Copia-20_PAb-I	TRUE	TRUE	TRUE	#35978f
6	Copia-27_MLP-I	TRUE	TRUE	TRUE	#35978f
6	Copia-27_PAb-I	TRUE	TRUE	TRUE	#35978f
6	Copia-27_Pru-I	TRUE	TRUE	TRUE	#35978f
6	Copia-29_PAb-I	TRUE	TRUE	TRUE	#35978f
6	Copia-31_CQ-I	TRUE	TRUE	TRUE	#35978f
6	Copia-36_BD-I	TRUE	TRUE	TRUE	#35978f
6	Copia-3_PTc-LTR	TRUE	TRUE	TRUE	#35978f
6	Copia-3_TA-I	TRUE	TRUE	TRUE	#35978f
6	Copia-40_Mad-I	TRUE	TRUE	TRUE	#35978f
6	Copia-44_VV-LTR	TRUE	TRUE	TRUE	#35978f
6	Copia-45_FV-I	TRUE	TRUE	TRUE	#35978f
6	Copia-54_PTr-I	TRUE	TRUE	TRUE	#35978f
6	Copia-54_VV-I	TRUE	TRUE	TRUE	#35978f
6	Copia-55_GM-I	TRUE	TRUE	TRUE	#35978f
6	Copia-77_Mad-I	TRUE	TRUE	TRUE	#35978f
6	Copia-99_Mad-I	TRUE	TRUE	TRUE	#35978f
6	CR1-10_DR	TRUE	FALSE	FALSE	#dfc27d
6	CR1-10_HM	TRUE	TRUE	TRUE	#35978f
6	CR1-116_AAe	TRUE	TRUE	TRUE	#35978f
6	CR1-13_BF	TRUE	FALSE	FALSE	#dfc27d
6	CR1-13_CGi	TRUE	FALSE	FALSE	#dfc27d
6	CR1-17_BF	TRUE	FALSE	FALSE	#dfc27d
6	CR1-19_HM	TRUE	TRUE	TRUE	#35978f
6	CR1-1_CGi	TRUE	TRUE	TRUE	#35978f
6	CR1-1_CPB	TRUE	FALSE	FALSE	#dfc27d
6	CR1-1_HM	TRUE	TRUE	TRUE	#35978f
6	CR1-1_LG	TRUE	TRUE	TRUE	#35978f
6	CR1-20_HM	TRUE	TRUE	TRUE	#35978f
6	CR1-22_BF	TRUE	FALSE	FALSE	#dfc27d
6	CR1-27_BF	TRUE	TRUE	TRUE	#35978f
6	CR1-29_BF	TRUE	TRUE	TRUE	#35978f
6	CR1-31_HM	TRUE	TRUE	TRUE	#35978f
6	CR1-32_BF	TRUE	TRUE	TRUE	#35978f
6	CR1-39_HM	TRUE	TRUE	TRUE	#35978f
6	CR1-40_BF	TRUE	TRUE	TRUE	#35978f
6	CR1-44_HM	TRUE	TRUE	TRUE	#35978f
6	CR1-45_BF	TRUE	FALSE	FALSE	#dfc27d
6	CR1-45_HM	TRUE	TRUE	TRUE	#35978f
6	CR1-48_BF	TRUE	TRUE	TRUE	#35978f
6	CR1-4_BF	TRUE	TRUE	TRUE	#35978f
6	CR1-53_BF	TRUE	FALSE	FALSE	#dfc27d
6	CR1-61_HM	TRUE	TRUE	TRUE	#35978f
6	CR1-6_BF	TRUE	TRUE	TRUE	#35978f
6	CR1-6_CGi	TRUE	FALSE	FALSE	#dfc27d
6	CR1-71_HM	TRUE	TRUE	TRUE	#35978f
6	CR1-7_CGi	TRUE	TRUE	TRUE	#35978f
6	CR1-83_HM	TRUE	FALSE	FALSE	#dfc27d
6	CR1-84_HM	TRUE	TRUE	TRUE	#35978f
6	CR1-8_BF	TRUE	TRUE	TRUE	#35978f
6	CR1-98_AAe	TRUE	TRUE	TRUE	#35978f
6	CR1-9_BF	TRUE	TRUE	TRUE	#35978f
6	CR1-9_CGi	TRUE	TRUE	TRUE	#35978f
6	CR1-9_Crp	TRUE	FALSE	FALSE	#dfc27d
6	CR1-9_HM	TRUE	FALSE	FALSE	#dfc27d
6	CR1-9_SP	TRUE	FALSE	FALSE	#dfc27d
6	CR1_AC_1	TRUE	FALSE	FALSE	#dfc27d
6	CR1-L2-1_XT	TRUE	TRUE	TRUE	#35978f
6	CR1-Y2_Aves	TRUE	TRUE	TRUE	#35978f
6	Crack-1_BF	TRUE	TRUE	TRUE	#35978f
6	Crack-1_SP	TRUE	TRUE	TRUE	#35978f
6	Crack-22_AAe	TRUE	TRUE	TRUE	#35978f
6	Crack-29_AAe	TRUE	TRUE	TRUE	#35978f
6	Crack-2_AAe	TRUE	TRUE	TRUE	#35978f
6	Crack-31_AAe	TRUE	TRUE	TRUE	#35978f
6	Crack-4_HM	TRUE	FALSE	FALSE	#dfc27d
6	Crack-7_HM	TRUE	FALSE	FALSE	#dfc27d
6	Crack-8_BF	TRUE	TRUE	TRUE	#35978f
6	Crack-8_CQ	TRUE	TRUE	TRUE	#35978f
6	Crypton-13_CGi	TRUE	FALSE	FALSE	#dfc27d
6	CryptonH-1_DR	TRUE	FALSE	FALSE	#dfc27d
6	CryptonS-1_PR	TRUE	TRUE	TRUE	#35978f
6	CryptonV-1_HSal	TRUE	TRUE	TRUE	#35978f
6	Dada-U1B_DR	TRUE	TRUE	TRUE	#35978f
6	Daphne-13_HMa	TRUE	TRUE	TRUE	#35978f
6	Daphne-14_NV	TRUE	FALSE	FALSE	#dfc27d
6	Daphne-15_SP	TRUE	TRUE	TRUE	#35978f
6	Daphne-17_SP	TRUE	FALSE	FALSE	#dfc27d
6	Daphne-1_TCa	TRUE	TRUE	TRUE	#35978f
6	Daphne-29_HMa	TRUE	FALSE	FALSE	#dfc27d
6	Daphne-4_BF	TRUE	TRUE	TRUE	#35978f
6	Daphne-65_HMa	TRUE	TRUE	TRUE	#35978f
6	DIRS-26_XT	TRUE	TRUE	TRUE	#35978f
6	DIRS-30_NV	TRUE	TRUE	TRUE	#35978f
6	DIRS-5_SP	TRUE	FALSE	FALSE	#dfc27d
6	DIRS-6_CGi	TRUE	TRUE	TRUE	#35978f
6	DIRS-6_NV	TRUE	FALSE	FALSE	#dfc27d
6	DIRS-9_Lch	TRUE	TRUE	TRUE	#35978f
6	DIRS-N1_DR	TRUE	TRUE	TRUE	#35978f
6	DIRS-N1_NV	TRUE	TRUE	TRUE	#35978f
6	DM412	TRUE	TRUE	TRUE	#35978f
6	DMCR1A	TRUE	TRUE	TRUE	#35978f
6	DMSAT6	TRUE	TRUE	TRUE	#35978f
6	DNA2-16_DR	TRUE	TRUE	TRUE	#35978f
6	DNA2-28_CGi	TRUE	TRUE	TRUE	#35978f
6	DNA2-2_CQ	TRUE	TRUE	TRUE	#35978f
6	DNA-26_CGi	TRUE	TRUE	TRUE	#35978f
6	DNA30_Lch	TRUE	TRUE	TRUE	#35978f
6	DNA-3-3_NV	TRUE	FALSE	FALSE	#dfc27d
6	DNA4-37_CGi	TRUE	TRUE	TRUE	#35978f
6	DNA6-13B_CGi	TRUE	TRUE	TRUE	#35978f
6	DNA-8-7_DR	TRUE	TRUE	TRUE	#35978f
6	DNA8-9_DR	TRUE	TRUE	TRUE	#35978f
6	DNAREP1_DYak	TRUE	TRUE	TRUE	#35978f
6	DNA-X-4A_NV	TRUE	TRUE	TRUE	#35978f
6	DOC5_DM	TRUE	TRUE	TRUE	#35978f
6	EN1_ZM	TRUE	TRUE	TRUE	#35978f
6	EnSpm-14_OS	TRUE	TRUE	TRUE	#35978f
6	EnSpm-14_ZM	TRUE	TRUE	TRUE	#35978f
6	EnSpm-15_SBi	TRUE	TRUE	TRUE	#35978f
6	EnSpm-16_OS	TRUE	TRUE	TRUE	#35978f
6	EnSpm-18_HMa	TRUE	TRUE	TRUE	#35978f
6	EnSpm-18_ZM	TRUE	TRUE	TRUE	#35978f
6	EnSpm-1_AA	TRUE	TRUE	TRUE	#35978f
6	EnSpm-2_CGi	TRUE	TRUE	TRUE	#35978f
6	EnSpm-2_DR	TRUE	TRUE	TRUE	#35978f
6	EnSpm-2_GM	TRUE	TRUE	TRUE	#35978f
6	EnSpm-2_NVi	TRUE	FALSE	FALSE	#dfc27d
6	ENSPM3_ZM	TRUE	TRUE	TRUE	#35978f
6	EnSpm-4_DR	TRUE	TRUE	TRUE	#35978f
6	EnSpm4_SB	TRUE	TRUE	TRUE	#35978f
6	ENSPM_MT	TRUE	TRUE	TRUE	#35978f
6	EnSpm-N1_T	TRUE	TRUE	TRUE	#35978f
6	ENSUPMET	TRUE	TRUE	TRUE	#35978f
6	ERV1-1-I_DR	TRUE	TRUE	TRUE	#35978f
6	ERV1-2-LTR_BT	TRUE	TRUE	TRUE	#35978f
6	ERV1-3-I_BT	TRUE	TRUE	TRUE	#35978f
6	ERV1-3N-EC_I-int	TRUE	TRUE	TRUE	#35978f
6	ERV-1_CPB-LTR	TRUE	TRUE	TRUE	#35978f
6	ERV24_Prim-int	TRUE	TRUE	TRUE	#35978f
6	ERV3_DR-I	TRUE	TRUE	TRUE	#35978f
6	ERV-6_CPB-I	TRUE	TRUE	TRUE	#35978f
6	Ginger1-11_HM	TRUE	TRUE	TRUE	#35978f
6	Ginger1-1_BF	TRUE	FALSE	FALSE	#dfc27d
6	Ginger1-4_HM	TRUE	TRUE	TRUE	#35978f
6	GmCOPIA10_I-int	TRUE	TRUE	TRUE	#35978f
6	GYPSM1_I-int	TRUE	TRUE	TRUE	#35978f
6	Gypsy-10_OD-I	TRUE	TRUE	TRUE	#35978f
6	Gypsy-118_GM-I	TRUE	TRUE	TRUE	#35978f
6	Gypsy-119_AA-LTR	TRUE	TRUE	TRUE	#35978f
6	Gypsy-11_CFl-LTR	TRUE	TRUE	TRUE	#35978f
6	Gypsy-11_XT-I	TRUE	TRUE	TRUE	#35978f
6	Gypsy-13_RO-I	TRUE	TRUE	TRUE	#35978f
6	Gypsy-14_CPB-I	TRUE	FALSE	FALSE	#dfc27d
6	Gypsy15-I_CR	TRUE	TRUE	TRUE	#35978f
6	Gypsy163-I_DR	TRUE	FALSE	FALSE	#dfc27d
6	Gypsy-16-I_DR	TRUE	TRUE	TRUE	#35978f
6	Gypsy-18_HM-I	TRUE	TRUE	TRUE	#35978f
6	Gypsy-18-I_DR	TRUE	TRUE	TRUE	#35978f
6	Gypsy-18-I_NVi	TRUE	TRUE	TRUE	#35978f
6	Gypsy1-I_SP	TRUE	TRUE	TRUE	#35978f
6	Gypsy-1_SK-I	TRUE	TRUE	TRUE	#35978f
6	Gypsy-1_XT-I	TRUE	TRUE	TRUE	#35978f
6	Gypsy-204_DR-I	TRUE	TRUE	TRUE	#35978f
6	Gypsy-20_RO-I	TRUE	TRUE	TRUE	#35978f
6	Gypsy-20_RP-I	TRUE	TRUE	TRUE	#35978f
6	Gypsy-21_LCh-I	TRUE	FALSE	FALSE	#dfc27d
6	Gypsy-229_AA-I	TRUE	TRUE	TRUE	#35978f
6	Gypsy-23_CQ-I	TRUE	TRUE	TRUE	#35978f
6	Gypsy-23_DY-I	TRUE	TRUE	TRUE	#35978f
6	Gypsy-23_VV-I	TRUE	TRUE	TRUE	#35978f
6	Gypsy-24_DWil-I	TRUE	FALSE	FALSE	#dfc27d
6	Gypsy24-I_Dpse	TRUE	TRUE	TRUE	#35978f
6	Gypsy-25_CSa-I	TRUE	FALSE	FALSE	#dfc27d
6	Gypsy-25_DYa-I	TRUE	TRUE	TRUE	#35978f
6	Gypsy-25_IS-I	TRUE	FALSE	FALSE	#dfc27d
6	Gypsy-25_LBS-I	TRUE	TRUE	TRUE	#35978f
6	Gypsy-25_PM-I	TRUE	TRUE	TRUE	#35978f
6	Gypsy-26_Adi-I	TRUE	FALSE	FALSE	#dfc27d
6	Gypsy-27_CSa-I	TRUE	TRUE	TRUE	#35978f
6	Gypsy-29-I_NVi	TRUE	TRUE	TRUE	#35978f
6	Gypsy-2_BM-I	TRUE	TRUE	TRUE	#35978f
6	Gypsy-2_EPa-I	TRUE	TRUE	TRUE	#35978f
6	Gypsy2-I_Dmoj	TRUE	TRUE	TRUE	#35978f
6	Gypsy2-I_Dya	TRUE	TRUE	TRUE	#35978f
6	Gypsy2-I_MT	TRUE	TRUE	TRUE	#35978f
6	Gypsy2-I_SP	TRUE	FALSE	FALSE	#dfc27d
6	Gypsy-2_LCh-I	TRUE	FALSE	FALSE	#dfc27d
6	Gypsy-2_PMar-I	TRUE	TRUE	TRUE	#35978f
6	Gypsy-2_SPDB-I	TRUE	TRUE	TRUE	#35978f
6	Gypsy3-1-I_Lch	TRUE	TRUE	TRUE	#35978f
6	Gypsy-32_DWil-LTR	TRUE	TRUE	TRUE	#35978f
6	Gypsy-32_SI-I	TRUE	TRUE	TRUE	#35978f
6	Gypsy-33_CGi-I	TRUE	TRUE	TRUE	#35978f
6	Gypsy-37_DAn-I	TRUE	TRUE	TRUE	#35978f
6	Gypsy-38_CGi-I	TRUE	TRUE	TRUE	#35978f
6	Gypsy38-I_DR	TRUE	TRUE	TRUE	#35978f
6	Gypsy-39-I_NV	TRUE	TRUE	TRUE	#35978f
6	Gypsy-3_DPu-I	TRUE	TRUE	TRUE	#35978f
6	Gypsy-40_DAn-I	TRUE	TRUE	TRUE	#35978f
6	Gypsy-40_PAb-I	TRUE	TRUE	TRUE	#35978f
6	Gypsy42-I_AG	TRUE	TRUE	TRUE	#35978f
6	Gypsy42-ZM_I-int	TRUE	TRUE	TRUE	#35978f
6	Gypsy-43-I_NV	TRUE	TRUE	TRUE	#35978f
6	Gypsy-46_DEl-LTR	TRUE	TRUE	TRUE	#35978f
6	Gypsy-52_Mad-I	TRUE	TRUE	TRUE	#35978f
6	Gypsy-58_CGi-I	TRUE	TRUE	TRUE	#35978f
6	Gypsy-59_CQ-I	TRUE	TRUE	TRUE	#35978f
6	Gypsy-5_AMi-I	TRUE	TRUE	TRUE	#35978f
6	Gypsy-5_DWil-LTR	TRUE	TRUE	TRUE	#35978f
6	Gypsy5-I_SP	TRUE	FALSE	FALSE	#dfc27d
6	Gypsy-5_PBa-I	TRUE	TRUE	TRUE	#35978f
6	Gypsy-607_AA-I	TRUE	TRUE	TRUE	#35978f
6	Gypsy-69_CGi-I	TRUE	TRUE	TRUE	#35978f
6	Gypsy-6_DPu-I	TRUE	TRUE	TRUE	#35978f
6	Gypsy-6_Trm-I	TRUE	TRUE	TRUE	#35978f
6	Gypsy-70-I_ZM	TRUE	TRUE	TRUE	#35978f
6	Gypsy-71_CGi-I	TRUE	TRUE	TRUE	#35978f
6	Gypsy-72-LTR_ZM	TRUE	TRUE	TRUE	#35978f
6	Gypsy-75_CGi-I	TRUE	TRUE	TRUE	#35978f
6	Gypsy-81_CGi-I	TRUE	FALSE	FALSE	#dfc27d
6	Gypsy-81_PAb-I	TRUE	TRUE	TRUE	#35978f
6	Gypsy-82_CQ-I	TRUE	TRUE	TRUE	#35978f
6	Gypsy-86_PAb-I	TRUE	TRUE	TRUE	#35978f
6	Gypsy-8_Adi-I	TRUE	TRUE	TRUE	#35978f
6	Gypsy-8_CGi-I	TRUE	FALSE	FALSE	#dfc27d
6	Gypsy-92_ZM-I	TRUE	TRUE	TRUE	#35978f
6	Gypsy95-I_DR	TRUE	TRUE	TRUE	#35978f
6	Gypsy-9_DTa-I	TRUE	TRUE	TRUE	#35978f
6	GYVIT1_I-int	TRUE	TRUE	TRUE	#35978f
6	HAL1-1H_Cpo	TRUE	TRUE	TRUE	#35978f
6	HARB-4_ALy	TRUE	TRUE	TRUE	#35978f
6	Harbinger1_AG	TRUE	TRUE	TRUE	#35978f
6	Harbinger-1_DW	TRUE	FALSE	FALSE	#dfc27d
6	Harbinger-1_MLP	TRUE	TRUE	TRUE	#35978f
6	Harbinger-1_PPe	TRUE	TRUE	TRUE	#35978f
6	Harbinger-4_CGi	TRUE	TRUE	TRUE	#35978f
6	Harbinger-7_CGi	TRUE	FALSE	FALSE	#dfc27d
6	HAT-17_Mad	TRUE	TRUE	TRUE	#35978f
6	hAT-1_SP	TRUE	TRUE	TRUE	#35978f
6	hAT-20_Mad	TRUE	TRUE	TRUE	#35978f
6	hAT-2_EPa	TRUE	TRUE	TRUE	#35978f
6	hAT-2_SD	TRUE	TRUE	TRUE	#35978f
6	hAT-3_CGi	TRUE	FALSE	FALSE	#dfc27d
6	hAT-40_LCh	TRUE	FALSE	FALSE	#dfc27d
6	hAT-41_Lch	TRUE	TRUE	TRUE	#35978f
6	hAT-4B_AMi	TRUE	TRUE	TRUE	#35978f
6	hAT-4C_ACar	TRUE	TRUE	TRUE	#35978f
6	HAT4_CI	TRUE	TRUE	TRUE	#35978f
6	hAT-4_PTr	TRUE	TRUE	TRUE	#35978f
6	hAT5-1_NV	TRUE	TRUE	TRUE	#35978f
6	hAT-5_LCh	TRUE	TRUE	TRUE	#35978f
6	hAT-5_SBi	TRUE	TRUE	TRUE	#35978f
6	hAT-61_HM	TRUE	TRUE	TRUE	#35978f
6	hAT6-2N1_SP	TRUE	TRUE	TRUE	#35978f
6	hAT-6_CGi	TRUE	FALSE	FALSE	#dfc27d
6	hAT-6_PTr	TRUE	TRUE	TRUE	#35978f
6	HAT-9_Mad	TRUE	TRUE	TRUE	#35978f
6	hAT-9_NV	TRUE	FALSE	FALSE	#dfc27d
6	hATm-15_HM	TRUE	TRUE	TRUE	#35978f
6	hAT-N11_ACar	TRUE	TRUE	TRUE	#35978f
6	HATN17_DR	TRUE	TRUE	TRUE	#35978f
6	hATw-3_HM	TRUE	TRUE	TRUE	#35978f
6	HEL	TRUE	TRUE	TRUE	#35978f
6	Helena_Ds	TRUE	TRUE	TRUE	#35978f
6	Helitron-10_CGi	TRUE	FALSE	FALSE	#dfc27d
6	Helitron-1_DEu	TRUE	TRUE	TRUE	#35978f
6	Helitron-1N2_DR	TRUE	TRUE	TRUE	#35978f
6	Helitron-1_NV	TRUE	FALSE	FALSE	#dfc27d
6	Helitron2_ZM	TRUE	TRUE	TRUE	#35978f
6	Helitron-5_CGi	TRUE	TRUE	TRUE	#35978f
6	Helitron-6_CGi	TRUE	TRUE	TRUE	#35978f
6	Helitron-7_DRh	TRUE	TRUE	TRUE	#35978f
6	Helitron-N1_AMi	TRUE	TRUE	TRUE	#35978f
6	Helitron-N25_CGi	TRUE	TRUE	TRUE	#35978f
6	Helitron-N37_CGi	TRUE	TRUE	TRUE	#35978f
6	Helitron-N6_NV	TRUE	TRUE	TRUE	#35978f
6	HelitronY1_CE	TRUE	TRUE	TRUE	#35978f
6	HelitronY2	TRUE	TRUE	TRUE	#35978f
6	HERVS71-int	TRUE	TRUE	TRUE	#35978f
6	HSAT6	TRUE	TRUE	TRUE	#35978f
6	IS3EU-2_CGi	TRUE	FALSE	FALSE	#dfc27d
6	IS3EU-3_DR	TRUE	FALSE	FALSE	#dfc27d
6	ISL2EU-10_CGi	TRUE	TRUE	TRUE	#35978f
6	ISL2EU-1_CS	TRUE	FALSE	FALSE	#dfc27d
6	ISL2EU-1_LHu	TRUE	TRUE	TRUE	#35978f
6	ISL2EU-2_HM	TRUE	TRUE	TRUE	#35978f
6	Kiri-13_AAe	TRUE	TRUE	TRUE	#35978f
6	Kiri-1_DPer	TRUE	FALSE	FALSE	#dfc27d
6	Kiri-21_AAe	TRUE	TRUE	TRUE	#35978f
6	Kiri-22_AAe	TRUE	TRUE	TRUE	#35978f
6	Kiri-23_AAe	TRUE	TRUE	TRUE	#35978f
6	Kiri-36_AAe	TRUE	TRUE	TRUE	#35978f
6	Kolobok-16_HM	TRUE	FALSE	FALSE	#dfc27d
6	Kolobok-1_CTe	TRUE	TRUE	TRUE	#35978f
6	Kolobok-2_BF	TRUE	FALSE	FALSE	#dfc27d
6	Kolobok-2_CGi	TRUE	TRUE	TRUE	#35978f
6	Kolobok-8_LMi	TRUE	TRUE	TRUE	#35978f
6	Kolobok-N1_PBa	TRUE	TRUE	TRUE	#35978f
6	L1-2_STu	TRUE	TRUE	TRUE	#35978f
6	L1-2_Ttr	TRUE	TRUE	TRUE	#35978f
6	L1-36_ACar	TRUE	TRUE	TRUE	#35978f
6	L1-3_Cis	TRUE	TRUE	TRUE	#35978f
6	L1-3_HM	TRUE	TRUE	TRUE	#35978f
6	L1-42_ACar	TRUE	TRUE	TRUE	#35978f
6	L1-43_DR	TRUE	TRUE	TRUE	#35978f
6	L1-44_XT	TRUE	TRUE	TRUE	#35978f
6	L1-79_DR	TRUE	TRUE	TRUE	#35978f
6	L1-7_Cis	TRUE	TRUE	TRUE	#35978f
6	L1-80_ACar	TRUE	TRUE	TRUE	#35978f
6	L1-94_Cis	TRUE	TRUE	TRUE	#35978f
6	L1-95_Cis	TRUE	TRUE	TRUE	#35978f
6	L1B-1_Cho	TRUE	TRUE	TRUE	#35978f
6	L1_Cis99Sat	TRUE	TRUE	TRUE	#35978f
6	L1SU_SP	TRUE	TRUE	TRUE	#35978f
6	L2	TRUE	TRUE	TRUE	#35978f
6	L2-12a_Lch	TRUE	TRUE	TRUE	#35978f
6	L2-16_DRe	TRUE	FALSE	FALSE	#dfc27d
6	L2-1_DR	TRUE	FALSE	FALSE	#dfc27d
6	L2-21_ACar	TRUE	FALSE	FALSE	#dfc27d
6	L2-3_DRe	TRUE	FALSE	FALSE	#dfc27d
6	L2-8_AAe	TRUE	TRUE	TRUE	#35978f
6	L2B-1_PBa	TRUE	TRUE	TRUE	#35978f
6	LOA-8_AAe	TRUE	TRUE	TRUE	#35978f
6	LOOPERN3B_DR	TRUE	TRUE	TRUE	#35978f
6	LTR32_Ttr	TRUE	TRUE	TRUE	#35978f
6	LTR39-int	TRUE	TRUE	TRUE	#35978f
6	LTR-47_Gav	TRUE	TRUE	TRUE	#35978f
6	Mariner-10_CGi	TRUE	FALSE	FALSE	#dfc27d
6	Mariner-24_CGi	TRUE	TRUE	TRUE	#35978f
6	Mariner-N1B_CGi	TRUE	TRUE	TRUE	#35978f
6	Mariner-N1_CGi	TRUE	TRUE	TRUE	#35978f
6	MER132	TRUE	FALSE	FALSE	#dfc27d
6	MER4B-int	TRUE	TRUE	TRUE	#35978f
6	MINISAT2_CB	TRUE	TRUE	TRUE	#35978f
6	MINISAT3_CB	TRUE	TRUE	TRUE	#35978f
6	MINISAT4_CB	TRUE	TRUE	TRUE	#35978f
6	MSAT-1_ADi	TRUE	TRUE	TRUE	#35978f
6	MuDR-12_VV	TRUE	TRUE	TRUE	#35978f
6	MuDr-1_BF	TRUE	FALSE	FALSE	#dfc27d
6	MuDR-2_GM	TRUE	TRUE	TRUE	#35978f
6	MuDR-3_CGi	TRUE	TRUE	TRUE	#35978f
6	MuDR-7_ZM	TRUE	TRUE	TRUE	#35978f
6	Novosib-1_EmiHux	TRUE	TRUE	TRUE	#35978f
6	OGRE-I_PS	TRUE	TRUE	TRUE	#35978f
6	Ogre-MT4_I-int	TRUE	TRUE	TRUE	#35978f
6	OSTE26	TRUE	TRUE	TRUE	#35978f
6	Penelope1D_XT	TRUE	TRUE	TRUE	#35978f
6	Perere-9	TRUE	TRUE	TRUE	#35978f
6	piggyBac-N2A_XT	TRUE	TRUE	TRUE	#35978f
6	Polinton-10_NVi	TRUE	TRUE	TRUE	#35978f
6	Polinton-1_AMi	TRUE	TRUE	TRUE	#35978f
6	Polinton-1_CI	TRUE	TRUE	TRUE	#35978f
6	Polinton-1_TV	TRUE	TRUE	TRUE	#35978f
6	Polinton-5_PBa	TRUE	TRUE	TRUE	#35978f
6	polypurine	TRUE	TRUE	TRUE	#35978f
6	POPCOP2_I-int	TRUE	TRUE	TRUE	#35978f
6	POPGY1_I-int	TRUE	TRUE	TRUE	#35978f
6	RandI-1_VC	TRUE	TRUE	TRUE	#35978f
6	REP-1_CQ	TRUE	TRUE	TRUE	#35978f
6	REP-1_SP	TRUE	TRUE	TRUE	#35978f
6	REP-1_ZM	TRUE	TRUE	TRUE	#35978f
6	REP-3_CPB	TRUE	TRUE	TRUE	#35978f
6	RLG_scAngela_3_1-I	TRUE	TRUE	TRUE	#35978f
6	RLG_scDEL_1_6-I	TRUE	TRUE	TRUE	#35978f
6	RLG_scMaximus_1_7-I	TRUE	TRUE	TRUE	#35978f
6	RLG_scMaximus_4_1-I	TRUE	TRUE	TRUE	#35978f
6	RMER17C2	TRUE	TRUE	TRUE	#35978f
6	RMER17C-int	TRUE	TRUE	TRUE	#35978f
6	RTE-1C_DAn	TRUE	TRUE	TRUE	#35978f
6	RTE-24_CPB	TRUE	TRUE	TRUE	#35978f
6	RTE-27_CPB	TRUE	FALSE	FALSE	#dfc27d
6	RTE-3_AMi	TRUE	TRUE	TRUE	#35978f
6	RTE-3_CPB	TRUE	TRUE	TRUE	#35978f
6	RTE-4_NV	TRUE	FALSE	FALSE	#dfc27d
6	RTE-5_AMi	TRUE	TRUE	TRUE	#35978f
6	RTE-5_LCh	TRUE	TRUE	TRUE	#35978f
6	RTE-5_SP	TRUE	TRUE	TRUE	#35978f
6	RTEX-13_SK	TRUE	FALSE	FALSE	#dfc27d
6	RTEX-15_SK	TRUE	TRUE	TRUE	#35978f
6	RTEX-19_CGi	TRUE	TRUE	TRUE	#35978f
6	RTEX-20_SK	TRUE	TRUE	TRUE	#35978f
6	RTEX-21_SK	TRUE	TRUE	TRUE	#35978f
6	RTEX-24_CGi	TRUE	TRUE	TRUE	#35978f
6	RTEX-24_SK	TRUE	TRUE	TRUE	#35978f
6	RTEX-26_SK	TRUE	TRUE	TRUE	#35978f
6	RTEX-4_NV	TRUE	TRUE	TRUE	#35978f
6	RTEX-5_BF	TRUE	FALSE	FALSE	#dfc27d
6	RTEX-5_VC	TRUE	TRUE	TRUE	#35978f
6	SAT-21_DR	TRUE	FALSE	FALSE	#dfc27d
6	SAT3_CM	TRUE	TRUE	TRUE	#35978f
6	Shinagawa-1_CQ	TRUE	FALSE	FALSE	#dfc27d
6	SINE2-1_SSc	TRUE	TRUE	TRUE	#35978f
6	SINE2B-1_CM	TRUE	FALSE	FALSE	#dfc27d
6	SINE-4_CQ	TRUE	TRUE	TRUE	#35978f
6	Sola1-6_AAe	TRUE	TRUE	TRUE	#35978f
6	Sola2-2_CGi	TRUE	TRUE	TRUE	#35978f
6	Sola2-2_LHu	TRUE	TRUE	TRUE	#35978f
6	Sola3-3_BF	TRUE	FALSE	FALSE	#dfc27d
6	Tad1-41_BG	TRUE	FALSE	FALSE	#dfc27d
6	Tad1-66B_BG	TRUE	TRUE	TRUE	#35978f
6	TE-11_NV	TRUE	TRUE	TRUE	#35978f
6	TE2-4_CR	TRUE	TRUE	TRUE	#35978f
6	TRE3C	TRUE	TRUE	TRUE	#35978f
6	TUB2	TRUE	TRUE	TRUE	#35978f
6	TUB4	TRUE	TRUE	TRUE	#35978f
6	Tx1-10_CGi	TRUE	TRUE	TRUE	#35978f
6	Tx1-12_BF	TRUE	TRUE	TRUE	#35978f
6	Tx1-16_SK	TRUE	TRUE	TRUE	#35978f
6	Tx1-1_DR	TRUE	TRUE	TRUE	#35978f
6	Tx1-20_DR	TRUE	TRUE	TRUE	#35978f
6	Tx1-32_DR	TRUE	TRUE	TRUE	#35978f
6	Tx1-43_DR	TRUE	TRUE	TRUE	#35978f
6	Tx1-45_DR	TRUE	TRUE	TRUE	#35978f
6	TX1_FR1	TRUE	TRUE	TRUE	#35978f
6	U2_sat	TRUE	TRUE	TRUE	#35978f
6	U3	TRUE	FALSE	FALSE	#dfc27d
6	Urukhai_Cis	TRUE	TRUE	TRUE	#35978f
6	Vandal1	TRUE	TRUE	TRUE	#35978f
6	Vandal4	TRUE	TRUE	TRUE	#35978f
6	VIHAT3	TRUE	TRUE	TRUE	#35978f
6	X2_LINE	TRUE	FALSE	FALSE	#dfc27d
6	Zator-1_CGi	TRUE	TRUE	TRUE	#35978f
5	Academ-1_AP	TRUE	TRUE	TRUE	#35978f
5	Academ-1_BF	TRUE	TRUE	TRUE	#35978f
5	Academ-1_DPu	TRUE	FALSE	FALSE	#dfc27d
5	Academ-1_PM	TRUE	TRUE	TRUE	#35978f
5	Academ-2_BF	TRUE	FALSE	FALSE	#dfc27d
5	Academ-2_SK	TRUE	TRUE	TRUE	#35978f
5	Academ-4_BF	TRUE	FALSE	FALSE	#dfc27d
5	Academ-5_SK	TRUE	TRUE	TRUE	#35978f
5	Academ-6_SK	TRUE	FALSE	FALSE	#dfc27d
5	Academ-7_SK	TRUE	TRUE	TRUE	#35978f
5	ACCORD_I-int	TRUE	TRUE	TRUE	#35978f
5	Ag-Jock-13	TRUE	TRUE	TRUE	#35978f
5	ALBERT_TA	TRUE	TRUE	TRUE	#35978f
5	ALRY-MAJOR_PT	TRUE	TRUE	TRUE	#35978f
5	AmnL2-1	TRUE	TRUE	TRUE	#35978f
5	AmnSINE1	TRUE	FALSE	FALSE	#dfc27d
5	ATCopia62_I-int	TRUE	TRUE	TRUE	#35978f
5	ATCopia84LTR	TRUE	TRUE	TRUE	#35978f
5	ATGP5A_I-int	TRUE	TRUE	TRUE	#35978f
5	Baggins1_Cis	TRUE	TRUE	TRUE	#35978f
5	BAGY2_HV-int	TRUE	TRUE	TRUE	#35978f
5	BARBARA_TM-int	TRUE	TRUE	TRUE	#35978f
5	BEL-11_CGi-I	TRUE	TRUE	TRUE	#35978f
5	BEL-11_CSa-I	TRUE	FALSE	FALSE	#dfc27d
5	BEL-12_Adi-I	TRUE	FALSE	FALSE	#dfc27d
5	BEL-12_CQ-LTR	TRUE	TRUE	TRUE	#35978f
5	BEL12-I_DR	TRUE	TRUE	TRUE	#35978f
5	BEL-12_LH-I	TRUE	TRUE	TRUE	#35978f
5	BEL-13-I_NV	TRUE	FALSE	FALSE	#dfc27d
5	BEL-14_Adi-I	TRUE	TRUE	TRUE	#35978f
5	BEL-156_AA-I	TRUE	TRUE	TRUE	#35978f
5	BEL-15_DTa-I	TRUE	TRUE	TRUE	#35978f
5	BEL-16_Adi-I	TRUE	TRUE	TRUE	#35978f
5	BEL-178_AA-I	TRUE	FALSE	FALSE	#dfc27d
5	BEL-17_CGi-I	TRUE	FALSE	FALSE	#dfc27d
5	BEL-18_CGi-I	TRUE	TRUE	TRUE	#35978f
5	BEL1_Cis_int-int	TRUE	FALSE	FALSE	#dfc27d
5	BEL-1_CSa-I	TRUE	FALSE	FALSE	#dfc27d
5	BEL-1_DFi-I	TRUE	FALSE	FALSE	#dfc27d
5	BEL-1_GA-I	TRUE	FALSE	FALSE	#dfc27d
5	BEL1-I_AG	TRUE	TRUE	TRUE	#35978f
5	BEL-1-I_NV	TRUE	TRUE	TRUE	#35978f
5	BEL1-I_SP	TRUE	FALSE	FALSE	#dfc27d
5	BEL-1-I_XT	TRUE	TRUE	TRUE	#35978f
5	BEL-1_RP-I	TRUE	FALSE	FALSE	#dfc27d
5	BEL-219_AA-I	TRUE	FALSE	FALSE	#dfc27d
5	BEL22-I_DR	TRUE	TRUE	TRUE	#35978f
5	BEL-24_AA-I	TRUE	FALSE	FALSE	#dfc27d
5	BEL2_Cis_int-int	TRUE	TRUE	TRUE	#35978f
5	BEL-2-I_NV	TRUE	FALSE	FALSE	#dfc27d
5	BEL30-I_DR	TRUE	TRUE	TRUE	#35978f
5	BEL32-I_DR	TRUE	FALSE	FALSE	#dfc27d
5	BEL36-I_DR	TRUE	FALSE	FALSE	#dfc27d
5	BEL-38-I_DR	TRUE	TRUE	TRUE	#35978f
5	BEL-3_Adi-I	TRUE	FALSE	FALSE	#dfc27d
5	BEL3_Cis_int-int	TRUE	FALSE	FALSE	#dfc27d
5	BEL-3_CSa-I	TRUE	TRUE	TRUE	#35978f
5	BEL-3_DYa-I	TRUE	TRUE	TRUE	#35978f
5	BEL-3-I_HM	TRUE	TRUE	TRUE	#35978f
5	BEL3-I_SP	TRUE	FALSE	FALSE	#dfc27d
5	BEL-3-I_XT	TRUE	TRUE	TRUE	#35978f
5	BEL-3-LTR_NVi	TRUE	TRUE	TRUE	#35978f
5	BEL-40_DRe-I	TRUE	FALSE	FALSE	#dfc27d
5	BEL-43_DRe-I	TRUE	FALSE	FALSE	#dfc27d
5	BEL4_Cis_int-int	TRUE	FALSE	FALSE	#dfc27d
5	BEL-4_DAn-I	TRUE	TRUE	TRUE	#35978f
5	BEL5_Cis_int-int	TRUE	FALSE	FALSE	#dfc27d
5	BEL-5_DEl-I	TRUE	FALSE	FALSE	#dfc27d
5	BEL-5_DPu-I	TRUE	TRUE	TRUE	#35978f
5	BEL-5_GA-I	TRUE	TRUE	TRUE	#35978f
5	BEL-5-I_NV	TRUE	FALSE	FALSE	#dfc27d
5	BEL-6_AA-I	TRUE	FALSE	FALSE	#dfc27d
5	BEL-6_Adi-I	TRUE	FALSE	FALSE	#dfc27d
5	BEL-6_CSa-I	TRUE	FALSE	FALSE	#dfc27d
5	BEL-6_DMoj-I	TRUE	TRUE	TRUE	#35978f
5	BEL-6_GA-I	TRUE	FALSE	FALSE	#dfc27d
5	BEL-6-I_NV	TRUE	FALSE	FALSE	#dfc27d
5	BEL-7_Adi-I	TRUE	TRUE	TRUE	#35978f
5	BEL-7_DPu-I	TRUE	TRUE	TRUE	#35978f
5	BEL-8_Adi-I	TRUE	FALSE	FALSE	#dfc27d
5	BEL-93_CQ-LTR	TRUE	TRUE	TRUE	#35978f
5	BEL-9_Adi-I	TRUE	FALSE	FALSE	#dfc27d
5	BEL-9_CSa-I	TRUE	TRUE	TRUE	#35978f
5	BLACKJACK	TRUE	FALSE	FALSE	#dfc27d
5	BovB_ACo	TRUE	TRUE	TRUE	#35978f
5	BovB_Dr	TRUE	TRUE	TRUE	#35978f
5	Bridge1_FR	TRUE	TRUE	TRUE	#35978f
5	BTLTR1J1	TRUE	TRUE	TRUE	#35978f
5	BvL1	TRUE	TRUE	TRUE	#35978f
5	CACTA-1_Roryzae	TRUE	TRUE	TRUE	#35978f
5	CACTA-3_AA	TRUE	TRUE	TRUE	#35978f
5	CATCH3I_DR	TRUE	FALSE	FALSE	#dfc27d
5	Caulimovirus-3_GMa	TRUE	TRUE	TRUE	#35978f
5	CER15-I_CE	TRUE	TRUE	TRUE	#35978f
5	CER3-I_CE	TRUE	TRUE	TRUE	#35978f
5	CER8-I_CE	TRUE	TRUE	TRUE	#35978f
5	Chapaev-1_BF	TRUE	TRUE	TRUE	#35978f
5	Chapaev-3_NV	TRUE	FALSE	FALSE	#dfc27d
5	CIRCE	TRUE	TRUE	TRUE	#35978f
5	CLAUDIA1_TM_I-int	TRUE	TRUE	TRUE	#35978f
5	CLOUD-7	TRUE	TRUE	TRUE	#35978f
5	CoeEFV-I	TRUE	TRUE	TRUE	#35978f
5	COP18_I_MT-int	TRUE	TRUE	TRUE	#35978f
5	COP2_I_MT-int	TRUE	FALSE	FALSE	#dfc27d
5	Copia-11_LH-I	TRUE	TRUE	TRUE	#35978f
5	Copia-12_ST-I	TRUE	TRUE	TRUE	#35978f
5	Copia-13_FV-I	TRUE	TRUE	TRUE	#35978f
5	Copia-17_CP-I	TRUE	TRUE	TRUE	#35978f
5	Copia-1_AC-I	TRUE	TRUE	TRUE	#35978f
5	Copia-1_AL-I	TRUE	FALSE	FALSE	#dfc27d
5	COPIA1-LTR_LC	TRUE	TRUE	TRUE	#35978f
5	Copia-1_SCH-I	TRUE	TRUE	TRUE	#35978f
5	Copia-26_MLP-I	TRUE	TRUE	TRUE	#35978f
5	Copia-27_GM-I	TRUE	TRUE	TRUE	#35978f
5	Copia-28_FV-I	TRUE	TRUE	TRUE	#35978f
5	Copia-28_PAb-I	TRUE	TRUE	TRUE	#35978f
5	Copia-28_Pru-I	TRUE	TRUE	TRUE	#35978f
5	Copia-29_DPu-I	TRUE	TRUE	TRUE	#35978f
5	Copia-29_ST-I	TRUE	TRUE	TRUE	#35978f
5	Copia29-VV_I-int	TRUE	TRUE	TRUE	#35978f
5	Copia2-I_XT	TRUE	TRUE	TRUE	#35978f
5	Copia-30_PAb-I	TRUE	TRUE	TRUE	#35978f
5	Copia-31_Pru-LTR	TRUE	TRUE	TRUE	#35978f
5	Copia-34_FV-I	TRUE	TRUE	TRUE	#35978f
5	Copia-34_PX-I	TRUE	TRUE	TRUE	#35978f
5	Copia-37_DPu-I	TRUE	TRUE	TRUE	#35978f
5	Copia-38_ST-I	TRUE	TRUE	TRUE	#35978f
5	Copia-3_FV-I	TRUE	TRUE	TRUE	#35978f
5	Copia-3-I_NV	TRUE	TRUE	TRUE	#35978f
5	Copia-3_PPa-I	TRUE	TRUE	TRUE	#35978f
5	Copia-42_VV-I	TRUE	TRUE	TRUE	#35978f
5	Copia-48_GM-I	TRUE	FALSE	FALSE	#dfc27d
5	Copia-49_VV-I	TRUE	TRUE	TRUE	#35978f
5	Copia4_LTR_MT	TRUE	TRUE	TRUE	#35978f
5	Copia-4_XT-I	TRUE	TRUE	TRUE	#35978f
5	Copia-53_MLP-I	TRUE	TRUE	TRUE	#35978f
5	Copia-56_VV-I	TRUE	TRUE	TRUE	#35978f
5	Copia-58_PX-I	TRUE	TRUE	TRUE	#35978f
5	Copia5-I_DR	TRUE	TRUE	TRUE	#35978f
5	Copia-5_TA-I	TRUE	TRUE	TRUE	#35978f
5	Copia-60_SB-I	TRUE	TRUE	TRUE	#35978f
5	Copia-64_ZM-I	TRUE	FALSE	FALSE	#dfc27d
5	Copia-65_Mad-I	TRUE	TRUE	TRUE	#35978f
5	Copia-66_BRa-I	TRUE	TRUE	TRUE	#35978f
5	Copia-66_PT-I	TRUE	TRUE	TRUE	#35978f
5	Copia-68_GM-LTR	TRUE	TRUE	TRUE	#35978f
5	Copia-69_GM-I	TRUE	TRUE	TRUE	#35978f
5	Copia-6_ST-I	TRUE	TRUE	TRUE	#35978f
5	Copia-6_TMe-I	TRUE	TRUE	TRUE	#35978f
5	Copia-72_Mad-I	TRUE	TRUE	TRUE	#35978f
5	Copia-72_ST-I	TRUE	FALSE	FALSE	#dfc27d
5	Copia-78_Mad-I	TRUE	TRUE	TRUE	#35978f
[truncated: 16,650 more rows]

## Sheet: TE families representing top 75% copies
# species	TEfam	present in Metazoa	Present in unicellular Holozoa	Present in Both	colorets
16	Ginger1-1_AC	TRUE	TRUE	TRUE	#35978f
16	hAT-N4_ALy	TRUE	TRUE	TRUE	#35978f
15	TART_DV	TRUE	TRUE	TRUE	#35978f
14	Polinton-2A_NV	TRUE	TRUE	TRUE	#35978f
13	EnSpm1_SB	TRUE	TRUE	TRUE	#35978f
13	EnSpm-5_HM	TRUE	TRUE	TRUE	#35978f
13	ENSPM-6_DR	TRUE	TRUE	TRUE	#35978f
13	hAT-N144_DR	TRUE	TRUE	TRUE	#35978f
12	Helitron-2_DR	TRUE	TRUE	TRUE	#35978f
12	Sola3-1_BF	TRUE	TRUE	TRUE	#35978f
11	Ag-Jock-1	TRUE	TRUE	TRUE	#35978f
11	ATCopia24I	TRUE	TRUE	TRUE	#35978f
11	Polinton-1_DR	TRUE	TRUE	TRUE	#35978f
11	R5-1_SM	TRUE	TRUE	TRUE	#35978f
11	RTAg4	TRUE	TRUE	TRUE	#35978f
10	CACTA_LP	TRUE	TRUE	TRUE	#35978f
10	Dada-tL_DR	TRUE	TRUE	TRUE	#35978f
10	Daphne-18_HM	TRUE	TRUE	TRUE	#35978f
10	DNA-8-3_HM	TRUE	TRUE	TRUE	#35978f
10	DNA-8-5_DR	TRUE	TRUE	TRUE	#35978f
10	DNA9-3_DR	TRUE	TRUE	TRUE	#35978f
10	EnSpm1_HV	TRUE	TRUE	TRUE	#35978f
10	EnSpm-9_DR	TRUE	TRUE	TRUE	#35978f
10	EnSpm-N13_DR	TRUE	TRUE	TRUE	#35978f
10	Gypsy68-I_AG	TRUE	TRUE	TRUE	#35978f
10	hAT-4_PBa	TRUE	TRUE	TRUE	#35978f
10	Novosib-6_CR	TRUE	TRUE	TRUE	#35978f
10	Sat-1_CPa	TRUE	TRUE	TRUE	#35978f
10	Sola1-1_AC	TRUE	TRUE	TRUE	#35978f
10	TE-X-5_DR	TRUE	TRUE	TRUE	#35978f
9	CR1-42_HM	TRUE	TRUE	TRUE	#35978f
9	CR1-79_HM	TRUE	TRUE	TRUE	#35978f
9	DIRS-4_DR	TRUE	TRUE	TRUE	#35978f
9	DNA2-5_DR	TRUE	TRUE	TRUE	#35978f
9	DNA6-6_DR	TRUE	TRUE	TRUE	#35978f
9	DNA7-N1_DR	TRUE	TRUE	TRUE	#35978f
9	Gypsy-24_DEl-I	TRUE	TRUE	TRUE	#35978f
9	hAT-2_HM	TRUE	TRUE	TRUE	#35978f
9	IMPB_01	TRUE	TRUE	TRUE	#35978f
9	Jockey-3_DGri	TRUE	TRUE	TRUE	#35978f
9	Kolobok-3_Aplcal	TRUE	TRUE	TRUE	#35978f
9	Kolobok-N1_AEc	TRUE	TRUE	TRUE	#35978f
9	MuDr-3_HM	TRUE	TRUE	TRUE	#35978f
9	Penelope-1_DR	TRUE	TRUE	TRUE	#35978f
9	REP-4_PBa	TRUE	TRUE	TRUE	#35978f
8	Chapaev-8_HM	TRUE	TRUE	TRUE	#35978f
8	Copia-1-I_HS	TRUE	TRUE	TRUE	#35978f
8	Dada-1_BF	TRUE	TRUE	TRUE	#35978f
8	EnSpm-4_HM	TRUE	TRUE	TRUE	#35978f
8	EnSpm-7_DR	TRUE	TRUE	TRUE	#35978f
8	ERV1-N3-I_DR	TRUE	TRUE	TRUE	#35978f
8	ERV1-N6-I_DR	TRUE	TRUE	TRUE	#35978f
8	hAT-2n1_DR	TRUE	TRUE	TRUE	#35978f
8	hAT-N53_DR	TRUE	TRUE	TRUE	#35978f
8	IS3EU-4_DR	TRUE	TRUE	TRUE	#35978f
8	Mariner-62_HSal	TRUE	TRUE	TRUE	#35978f
8	Merlin-1_DR	TRUE	TRUE	TRUE	#35978f
8	Neptune_Hyd	TRUE	TRUE	TRUE	#35978f
8	Polinton-8_NVi	TRUE	TRUE	TRUE	#35978f
8	RT1	TRUE	TRUE	TRUE	#35978f
7	CryptonV-2_DR	TRUE	TRUE	TRUE	#35978f
7	Dada-U6_SS	TRUE	TRUE	TRUE	#35978f
7	DNA-1-7_DR	TRUE	TRUE	TRUE	#35978f
7	DNA8-25_DR	TRUE	TRUE	TRUE	#35978f
7	DNA8-5_DR	TRUE	TRUE	TRUE	#35978f
7	DNA-N4_DR	TRUE	TRUE	TRUE	#35978f
7	EnSpm-17_HM	TRUE	TRUE	TRUE	#35978f
7	EnSpm-7_HM	TRUE	TRUE	TRUE	#35978f
7	Ginger1-5_HM	TRUE	TRUE	TRUE	#35978f
7	Ginger1-N1_DR	TRUE	TRUE	TRUE	#35978f
7	Gypsy-47_Mad-I	TRUE	TRUE	TRUE	#35978f
7	hAT-N131_DR	TRUE	TRUE	TRUE	#35978f
7	Homo6	TRUE	TRUE	TRUE	#35978f
7	ISL2EU-3N1_CFl	TRUE	TRUE	TRUE	#35978f
7	Jockey-6_DK	TRUE	TRUE	TRUE	#35978f
7	L1-11_DR	TRUE	TRUE	TRUE	#35978f
7	L1-53_DR	TRUE	TRUE	TRUE	#35978f
7	Mariner-N13_HSal	TRUE	TRUE	TRUE	#35978f
7	Polinton-9_NVi	TRUE	TRUE	TRUE	#35978f
7	Tx1-1_CGi	TRUE	TRUE	TRUE	#35978f
7	Tx1-3_PM	TRUE	TRUE	TRUE	#35978f
6	BEL1-I_SM	TRUE	TRUE	TRUE	#35978f
6	Chapaev-3_HM	TRUE	TRUE	TRUE	#35978f
6	Copia17-NVi_I-int	TRUE	TRUE	TRUE	#35978f
6	Copia-58_BG-I	TRUE	TRUE	TRUE	#35978f
6	CR1-3_HM	TRUE	TRUE	TRUE	#35978f
6	CR1-80_HM	TRUE	TRUE	TRUE	#35978f
6	DIRS-8_DR	TRUE	TRUE	TRUE	#35978f
6	DNA-11_CGi	TRUE	TRUE	TRUE	#35978f
6	DNA2-10_CGi	TRUE	TRUE	TRUE	#35978f
6	DNA-2-12_DR	TRUE	TRUE	TRUE	#35978f
6	DNA3-4_CGi	TRUE	TRUE	TRUE	#35978f
6	DNA8-10_CGi	TRUE	TRUE	TRUE	#35978f
6	EnSpm-1_HM	TRUE	TRUE	TRUE	#35978f
6	EnSpm-2_TD	TRUE	TRUE	TRUE	#35978f
6	EnSpm-30_SBi	TRUE	TRUE	TRUE	#35978f
6	EnSpm-34_SBi	TRUE	TRUE	TRUE	#35978f
6	ENSPM-6_ZM	TRUE	TRUE	TRUE	#35978f
6	GLT2_SM	TRUE	TRUE	TRUE	#35978f
6	Gypsy-31-LTR_DR	TRUE	TRUE	TRUE	#35978f
6	Gypsy-35_CGi-I	TRUE	TRUE	TRUE	#35978f
6	Gypsy-53_PM-LTR	TRUE	TRUE	TRUE	#35978f
6	Gypsy61-I_AG	TRUE	TRUE	TRUE	#35978f
6	HAT1_DR	TRUE	TRUE	TRUE	#35978f
6	HATN16_DR	TRUE	TRUE	TRUE	#35978f
6	Helitron-4_DR	TRUE	TRUE	TRUE	#35978f
6	IS3EU-1_DR	TRUE	TRUE	TRUE	#35978f
6	Kolobok-4_DR	TRUE	TRUE	TRUE	#35978f
6	L1-48_DR	TRUE	TRUE	TRUE	#35978f
6	LIN4b_SM	TRUE	TRUE	TRUE	#35978f
6	MdoLTR2-int	TRUE	TRUE	TRUE	#35978f
6	Nematis_Cr	TRUE	TRUE	TRUE	#35978f
6	P-30_HM	TRUE	TRUE	TRUE	#35978f
6	Penelope-13_HM	TRUE	TRUE	TRUE	#35978f
6	Polinton-2_HM	TRUE	TRUE	TRUE	#35978f
6	Polinton-3_PBa	TRUE	TRUE	TRUE	#35978f
6	SAT-1_SK	TRUE	TRUE	TRUE	#35978f
5	5S	TRUE	TRUE	TRUE	#35978f
5	CACTA-1_CapOwc	TRUE	TRUE	TRUE	#35978f
5	Chapaev-1_AA	TRUE	TRUE	TRUE	#35978f
5	Copia-1_ES-I	TRUE	TRUE	TRUE	#35978f
5	Copia-1_ST-LTR	TRUE	TRUE	TRUE	#35978f
5	Copia-7_ES-I	TRUE	TRUE	TRUE	#35978f
5	Coprina_Cc1	TRUE	TRUE	TRUE	#35978f
5	CR1-1_NV	TRUE	TRUE	TRUE	#35978f
5	DNA-3_FV	TRUE	TRUE	TRUE	#35978f
5	DNA8-26_DR	TRUE	TRUE	TRUE	#35978f
5	DNA-TA-4_DR	TRUE	TRUE	TRUE	#35978f
5	EnSpm-1_HV	TRUE	TRUE	TRUE	#35978f
5	EnSpm-22_HMa	TRUE	TRUE	TRUE	#35978f
5	ENSPM2_VV	TRUE	TRUE	TRUE	#35978f
5	EnSpm-6N1_DR	TRUE	TRUE	TRUE	#35978f
5	EnSpm-N14_DR	TRUE	TRUE	TRUE	#35978f
5	ERV1-1_SSc-I	TRUE	TRUE	TRUE	#35978f
5	Ginger2-1_LS	TRUE	TRUE	TRUE	#35978f
5	Gypsy-22_DWil-I	TRUE	TRUE	TRUE	#35978f
5	Gypsy-34_NVi-I	TRUE	TRUE	TRUE	#35978f
5	Gypsy-600_AA-I	TRUE	TRUE	TRUE	#35978f
5	Gypsy-6_AEc-LTR	TRUE	TRUE	TRUE	#35978f
5	Gypsy8-I_Dpse	TRUE	TRUE	TRUE	#35978f
5	Gypsy8-SM_I-int	TRUE	TRUE	TRUE	#35978f
5	HARB-6_ALy	TRUE	TRUE	TRUE	#35978f
5	hAT6-2_NV	TRUE	TRUE	TRUE	#35978f
5	Helitron-3N3_PM	TRUE	TRUE	TRUE	#35978f
5	HELITRON7_OS	TRUE	TRUE	TRUE	#35978f
5	Kolobok-2_DR	TRUE	TRUE	TRUE	#35978f
5	Kolobok-2_XT	TRUE	TRUE	TRUE	#35978f
5	L1-55_XT	TRUE	TRUE	TRUE	#35978f
5	L2-8_NVi	TRUE	TRUE	TRUE	#35978f
5	LTR160B_MD	TRUE	TRUE	TRUE	#35978f
5	Mariner-N5_HSal	TRUE	TRUE	TRUE	#35978f
5	P-27_HM	TRUE	TRUE	TRUE	#35978f
5	Polinton1_SM	TRUE	TRUE	TRUE	#35978f
5	Polinton-5_NVi	TRUE	TRUE	TRUE	#35978f
5	RLTR31D_MM	TRUE	TRUE	TRUE	#35978f
5	TE-5_CGi	TRUE	TRUE	TRUE	#35978f
5	TRE3D	TRUE	TRUE	TRUE	#35978f
5	ZFERV-2-I_DR	TRUE	TRUE	TRUE	#35978f
5	5S_DM	TRUE	FALSE	FALSE	#dfc27d
4	5S-Sauria	TRUE	TRUE	TRUE	#35978f
4	BMSAT1	TRUE	TRUE	TRUE	#35978f
4	CATCH2LTR_DR	TRUE	TRUE	TRUE	#35978f
4	Chapaev-3A_HM	TRUE	TRUE	TRUE	#35978f
4	CryptonV-3_DR	TRUE	TRUE	TRUE	#35978f
4	Dada-U6_DR	TRUE	TRUE	TRUE	#35978f
4	Daphne-73_HMa	TRUE	TRUE	TRUE	#35978f
4	DIRS-15B_DR	TRUE	TRUE	TRUE	#35978f
4	DIRS-21_ACar	TRUE	TRUE	TRUE	#35978f
4	DIRS-8B_DR	TRUE	TRUE	TRUE	#35978f
4	DNA3-14_CGi	TRUE	TRUE	TRUE	#35978f
4	DNA3-1_CGi	TRUE	TRUE	TRUE	#35978f
4	DNA4-24_CGi	TRUE	TRUE	TRUE	#35978f
4	EnSpm-10_HM	TRUE	TRUE	TRUE	#35978f
4	EnSpm-3_TA	TRUE	TRUE	TRUE	#35978f
4	EnSpm-9_OS	TRUE	TRUE	TRUE	#35978f
4	EnSpm-N2_DR	TRUE	TRUE	TRUE	#35978f
4	ERV1-7_DR-I	TRUE	TRUE	TRUE	#35978f
4	ERV38_MD-int	TRUE	TRUE	TRUE	#35978f
4	ERV46_MD_I-int	TRUE	TRUE	TRUE	#35978f
4	Ginger1-10_HM	TRUE	TRUE	TRUE	#35978f
4	Ginger1-6_HM	TRUE	TRUE	TRUE	#35978f
4	Gypsy-14_DAn-I	TRUE	TRUE	TRUE	#35978f
4	Gypsy-18B_PBa-I	TRUE	TRUE	TRUE	#35978f
4	Gypsy-1_AC-I	TRUE	TRUE	TRUE	#35978f
4	Gypsy1-SM_LTR	TRUE	TRUE	TRUE	#35978f
4	Gypsy-23_DEl-I	TRUE	TRUE	TRUE	#35978f
4	Gypsy-50_GA-LTR	TRUE	TRUE	TRUE	#35978f
4	Gypsy82-LTR_Dr	TRUE	TRUE	TRUE	#35978f
4	Gypsy98-LTR_Dr	TRUE	TRUE	TRUE	#35978f
4	HAL1-2a_MD	TRUE	TRUE	TRUE	#35978f
4	Harbinger2-2_ES	TRUE	TRUE	TRUE	#35978f
4	HAT-10_Mad	TRUE	TRUE	TRUE	#35978f
4	hAT-2_DR	TRUE	TRUE	TRUE	#35978f
4	hAT-40_HM	TRUE	TRUE	TRUE	#35978f
4	hAT-51_HM	TRUE	TRUE	TRUE	#35978f
4	hATm-27_HM	TRUE	TRUE	TRUE	#35978f
4	hAT-N36_DR	TRUE	TRUE	TRUE	#35978f
4	hAT-N70_DR	TRUE	TRUE	TRUE	#35978f
4	Helitron-1_DR	TRUE	TRUE	TRUE	#35978f
4	Helitron-N1_PBa	TRUE	TRUE	TRUE	#35978f
4	Helitron-N34_CGi	TRUE	TRUE	TRUE	#35978f
4	HMSBEAGLE_I-int	TRUE	TRUE	TRUE	#35978f
4	L1_AC_7	TRUE	TRUE	TRUE	#35978f
4	LTR24_Sar	TRUE	TRUE	TRUE	#35978f
4	LTR44B_MD	TRUE	TRUE	TRUE	#35978f
4	Mariner-14_LCh	TRUE	TRUE	TRUE	#35978f
4	Mariner-15_SIn	TRUE	TRUE	TRUE	#35978f
4	Mariner-29_HM	TRUE	TRUE	TRUE	#35978f
4	Mariner-30_HM	TRUE	TRUE	TRUE	#35978f
4	Mariner-31_HM	TRUE	TRUE	TRUE	#35978f
4	Mariner-79B_HSal	TRUE	TRUE	TRUE	#35978f
4	MERMITE18C	TRUE	TRUE	TRUE	#35978f
4	MOSAT-2_DR	TRUE	TRUE	TRUE	#35978f
4	MUDRAVI1	TRUE	TRUE	TRUE	#35978f
4	Nimb-4_DR	TRUE	TRUE	TRUE	#35978f
4	Polinton-1_SM	TRUE	TRUE	TRUE	#35978f
4	Polinton-2_PBa	TRUE	TRUE	TRUE	#35978f
4	Polinton3_SM	TRUE	TRUE	TRUE	#35978f
4	Poseidon-2B_PM	TRUE	TRUE	TRUE	#35978f
4	SAT2_CM	TRUE	TRUE	TRUE	#35978f
4	TE-X-4_DR	TRUE	TRUE	TRUE	#35978f
4	TE-X-4_NVi	TRUE	TRUE	TRUE	#35978f
4	Transib-2_HM	TRUE	TRUE	TRUE	#35978f
4	Transib-6_HM	TRUE	TRUE	TRUE	#35978f
4	TSESSEBEII	TRUE	TRUE	TRUE	#35978f
4	Tx1-5_PM	TRUE	TRUE	TRUE	#35978f
4	Helitron-9_CGi	TRUE	FALSE	FALSE	#dfc27d
4	L2-17_NV	TRUE	FALSE	FALSE	#dfc27d
4	Polinton-1_NV	TRUE	FALSE	FALSE	#dfc27d
3	Academ-1_SK	TRUE	TRUE	TRUE	#35978f
3	Academ-2_ADi	TRUE	TRUE	TRUE	#35978f
3	Academ-3_Aplcal	TRUE	TRUE	TRUE	#35978f
3	Academ-3_BF	TRUE	TRUE	TRUE	#35978f
3	Academ-4_SP	TRUE	TRUE	TRUE	#35978f
3	ALRY-MAJOR_PT	TRUE	TRUE	TRUE	#35978f
3	ATCopia59_I-int	TRUE	TRUE	TRUE	#35978f
3	BEL-1-I_NV	TRUE	TRUE	TRUE	#35978f
3	BEL-646_AA-I	TRUE	TRUE	TRUE	#35978f
3	Chapaev-6_HM	TRUE	TRUE	TRUE	#35978f
3	CIRCE	TRUE	TRUE	TRUE	#35978f
3	Copia-14_BG-I	TRUE	TRUE	TRUE	#35978f
3	Copia-18_MLP-I	TRUE	TRUE	TRUE	#35978f
3	Copia-1_CMe-I	TRUE	TRUE	TRUE	#35978f
3	Copia-42_SB-I	TRUE	TRUE	TRUE	#35978f
3	Copia-75_Mad-LTR	TRUE	TRUE	TRUE	#35978f
3	CR1-2_CQ	TRUE	TRUE	TRUE	#35978f
3	CR1-48_HM	TRUE	TRUE	TRUE	#35978f
3	CR1-78_AAe	TRUE	TRUE	TRUE	#35978f
3	CR1_Ele9	TRUE	TRUE	TRUE	#35978f
3	Crypton-4_CGi	TRUE	TRUE	TRUE	#35978f
3	DNA-1-8_DR	TRUE	TRUE	TRUE	#35978f
3	DNA-2-24_DR	TRUE	TRUE	TRUE	#35978f
3	DNA-2-32_DR	TRUE	TRUE	TRUE	#35978f
3	DNA2-6_CGi	TRUE	TRUE	TRUE	#35978f
3	DNA2-7_CGi	TRUE	TRUE	TRUE	#35978f
3	DNA3-13B_CGi	TRUE	TRUE	TRUE	#35978f
3	DNA6-9_CGi	TRUE	TRUE	TRUE	#35978f
3	DNA-6-N2_DR	TRUE	TRUE	TRUE	#35978f
3	DNA8-12_CGi	TRUE	TRUE	TRUE	#35978f
3	DNA-8-27_DR	TRUE	TRUE	TRUE	#35978f
3	EnSpm-15_HM	TRUE	TRUE	TRUE	#35978f
3	EnSpm-21_HMa	TRUE	TRUE	TRUE	#35978f
3	Ginger1-2_DR	TRUE	TRUE	TRUE	#35978f
3	Gypsy14-LTR_Dpse	TRUE	TRUE	TRUE	#35978f
3	Gypsy-18_PBa-I	TRUE	TRUE	TRUE	#35978f
3	Gypsy-19_SB-I	TRUE	TRUE	TRUE	#35978f
3	Gypsy-1_CMe-I	TRUE	TRUE	TRUE	#35978f
3	Gypsy-22_SB-I	TRUE	TRUE	TRUE	#35978f
3	Gypsy35-I_DR	TRUE	TRUE	TRUE	#35978f
3	Gypsy-38_NVi-LTR	TRUE	TRUE	TRUE	#35978f
3	Gypsy-9-I_CR	TRUE	TRUE	TRUE	#35978f
3	HARB-4_Mad	TRUE	TRUE	TRUE	#35978f
3	Harbinger-8_DR	TRUE	TRUE	TRUE	#35978f
3	HAT-4N1_Mad	TRUE	TRUE	TRUE	#35978f
3	hAT6-2_SP	TRUE	TRUE	TRUE	#35978f
3	hAT-N5_ACar	TRUE	TRUE	TRUE	#35978f
3	hAT-N6_ACar	TRUE	TRUE	TRUE	#35978f
3	Helitron-1_HM	TRUE	TRUE	TRUE	#35978f
3	Helitron-N1_HSal	TRUE	TRUE	TRUE	#35978f
3	Helitron-N3_CGi	TRUE	TRUE	TRUE	#35978f
3	HeT-A3_DVi	TRUE	TRUE	TRUE	#35978f
3	IS3EU-N1_CGi	TRUE	TRUE	TRUE	#35978f
3	L1-4_VC	TRUE	TRUE	TRUE	#35978f
3	L1-82_DR	TRUE	TRUE	TRUE	#35978f
3	L2_AC_2	TRUE	TRUE	TRUE	#35978f
3	LTR42_MD	TRUE	TRUE	TRUE	#35978f
3	Mariner-39_HM	TRUE	TRUE	TRUE	#35978f
3	MERMITE18D	TRUE	TRUE	TRUE	#35978f
3	MERMITE18F	TRUE	TRUE	TRUE	#35978f
3	MuDR-1_NV	TRUE	TRUE	TRUE	#35978f
3	MuDR-5_VV	TRUE	TRUE	TRUE	#35978f
3	P-1_DR	TRUE	TRUE	TRUE	#35978f
3	P-35_HM	TRUE	TRUE	TRUE	#35978f
3	PIVE	TRUE	TRUE	TRUE	#35978f
3	Polinton-4_SP	TRUE	TRUE	TRUE	#35978f
3	R1_DYa	TRUE	TRUE	TRUE	#35978f
3	Rex1-31_DRe	TRUE	TRUE	TRUE	#35978f
3	RLTR17B_Mm	TRUE	TRUE	TRUE	#35978f
3	RLTR32_Rn	TRUE	TRUE	TRUE	#35978f
3	RLTR51A_Mm	TRUE	TRUE	TRUE	#35978f
3	Sola1-2_AC	TRUE	TRUE	TRUE	#35978f
3	STALKER4_I-int	TRUE	TRUE	TRUE	#35978f
3	TUB1	TRUE	TRUE	TRUE	#35978f
3	TUBE2	TRUE	TRUE	TRUE	#35978f
3	Zisupton-1_DR	TRUE	TRUE	TRUE	#35978f
3	5SrRNA-1_BG	TRUE	FALSE	FALSE	#dfc27d
3	Academ-1_ADi	TRUE	FALSE	FALSE	#dfc27d
3	Academ-3_SP	TRUE	FALSE	FALSE	#dfc27d
3	Academ-5_SP	TRUE	FALSE	FALSE	#dfc27d
3	CR1-14_BF	TRUE	FALSE	FALSE	#dfc27d
3	CR1-15_BF	TRUE	FALSE	FALSE	#dfc27d
3	CR1-1_AG	TRUE	FALSE	FALSE	#dfc27d
3	CR1-35_HM	TRUE	FALSE	FALSE	#dfc27d
3	CryptonV-1_DR	TRUE	FALSE	FALSE	#dfc27d
3	Daphne-21_HMa	TRUE	FALSE	FALSE	#dfc27d
3	DIRS-6_DR	TRUE	FALSE	FALSE	#dfc27d
3	DIRS-8_NV	TRUE	FALSE	FALSE	#dfc27d
3	DMSAT6	TRUE	FALSE	FALSE	#dfc27d
3	DNA-2-15_DR	TRUE	FALSE	FALSE	#dfc27d
3	DNA-3-3_NV	TRUE	FALSE	FALSE	#dfc27d
3	DNA-5-13_NV	TRUE	FALSE	FALSE	#dfc27d
3	DNA-5-14_NV	TRUE	FALSE	FALSE	#dfc27d
3	DNA8-21_DR	TRUE	FALSE	FALSE	#dfc27d
3	DNA-TA-2_NV	TRUE	FALSE	FALSE	#dfc27d
3	DongAG	TRUE	FALSE	FALSE	#dfc27d
3	EnSpm-1_BF	TRUE	FALSE	FALSE	#dfc27d
3	EnSpm2_SB	TRUE	FALSE	FALSE	#dfc27d
3	Galileo_DM	TRUE	FALSE	FALSE	#dfc27d
3	Gypsy10-LTR_SP	TRUE	FALSE	FALSE	#dfc27d
3	Gypsy-125_SBi-LTR	TRUE	FALSE	FALSE	#dfc27d
3	Gypsy-20_CPB-I	TRUE	FALSE	FALSE	#dfc27d
3	Gypsy-26_Adi-I	TRUE	FALSE	FALSE	#dfc27d
3	Gypsy-3_Adi-I	TRUE	FALSE	FALSE	#dfc27d
3	Gypsy-55-I_NV	TRUE	FALSE	FALSE	#dfc27d
3	Gypsy56-I_DR	TRUE	FALSE	FALSE	#dfc27d
3	Gypsy-6-I_NV	TRUE	FALSE	FALSE	#dfc27d
3	hAT-42_Lch	TRUE	FALSE	FALSE	#dfc27d
3	Helitron-N23B_CGi	TRUE	FALSE	FALSE	#dfc27d
3	Helitron-N8_NV	TRUE	FALSE	FALSE	#dfc27d
3	IS4EU-1_NV	TRUE	FALSE	FALSE	#dfc27d
3	ISL2EU-1_SK	TRUE	FALSE	FALSE	#dfc27d
3	L2-16_NVe	TRUE	FALSE	FALSE	#dfc27d
3	Mariner-1_NV	TRUE	FALSE	FALSE	#dfc27d
3	Mariner-4N1_NV	TRUE	FALSE	FALSE	#dfc27d
3	Mariner-4_NV	TRUE	FALSE	FALSE	#dfc27d
3	MuDr-1x_SP	TRUE	FALSE	FALSE	#dfc27d
3	Polinton-3_NV	TRUE	FALSE	FALSE	#dfc27d
3	R4-1_ADi	TRUE	FALSE	FALSE	#dfc27d
3	ROO_I-int	TRUE	FALSE	FALSE	#dfc27d
3	SAT-23_DR	FALSE	TRUE	FALSE	#dfc27d
3	TDR13	TRUE	FALSE	FALSE	#dfc27d
3	TE-X-12_DR	TRUE	FALSE	FALSE	#dfc27d
3	U6	TRUE	FALSE	FALSE	#dfc27d
2	ALR/Alpha	TRUE	TRUE	TRUE	#35978f
2	AluJr4	TRUE	TRUE	TRUE	#35978f
2	Arnold2	TRUE	TRUE	TRUE	#35978f
2	ATDNAI27T9A	TRUE	TRUE	TRUE	#35978f
2	ATENSPM5	TRUE	TRUE	TRUE	#35978f
2	Baggins1_Cis	TRUE	TRUE	TRUE	#35978f
2	BEL-122_AA-I	TRUE	TRUE	TRUE	#35978f
2	BEL-18_CGi-I	TRUE	TRUE	TRUE	#35978f
2	BEL-19_CQ-LTR	TRUE	TRUE	TRUE	#35978f
2	BEL-227_AA-I	TRUE	TRUE	TRUE	#35978f
2	BEL22-I_DR	TRUE	TRUE	TRUE	#35978f
2	BEL-61_DRe-I	TRUE	TRUE	TRUE	#35978f
2	BHIKHARI-5-I_DR	TRUE	TRUE	TRUE	#35978f
2	Bilbo	TRUE	TRUE	TRUE	#35978f
2	CACTA-1_Roryzae	TRUE	TRUE	TRUE	#35978f
2	CACTA-Q	TRUE	TRUE	TRUE	#35978f
2	CANDYSTRIPE1_SB	TRUE	TRUE	TRUE	#35978f
2	CER13-I_CE	TRUE	TRUE	TRUE	#35978f
2	CER7-I_CE	TRUE	TRUE	TRUE	#35978f
2	CEREBA_HV-int	TRUE	TRUE	TRUE	#35978f
2	Chaplin5_FR	TRUE	TRUE	TRUE	#35978f
2	CLAUDIA1_TM_I-int	TRUE	TRUE	TRUE	#35978f
2	Copia-105_Mad-I	TRUE	TRUE	TRUE	#35978f
2	Copia-11_LH-I	TRUE	TRUE	TRUE	#35978f
2	Copia-12_PAb-LTR	TRUE	TRUE	TRUE	#35978f
2	Copia-18_BD-I	TRUE	TRUE	TRUE	#35978f
2	COPIA1-I_OS	TRUE	TRUE	TRUE	#35978f
2	Copia3-I_CR	TRUE	TRUE	TRUE	#35978f
2	Copia-47_Mad-LTR	TRUE	TRUE	TRUE	#35978f
2	Crack-11_AAe	TRUE	TRUE	TRUE	#35978f
2	Crack-25_AAe	TRUE	TRUE	TRUE	#35978f
2	DINOLT1	TRUE	TRUE	TRUE	#35978f
2	DNA-1-2_DR	TRUE	TRUE	TRUE	#35978f
2	DNA3-11_Mad	TRUE	TRUE	TRUE	#35978f
2	DNA3-8_STu	TRUE	TRUE	TRUE	#35978f
2	EnSpm-N10_DR	TRUE	TRUE	TRUE	#35978f
2	Eri-2B2_EE	TRUE	TRUE	TRUE	#35978f
2	FUGUREP2	TRUE	TRUE	TRUE	#35978f
2	Gypsy119-I_DR	TRUE	TRUE	TRUE	#35978f
2	Gypsy-120_SB-I	TRUE	TRUE	TRUE	#35978f
2	Gypsy-13_DWil-I	TRUE	TRUE	TRUE	#35978f
2	Gypsy-13_SMo-LTR	TRUE	TRUE	TRUE	#35978f
2	Gypsy-15_FV-I	TRUE	TRUE	TRUE	#35978f
2	Gypsy21-I_SP	TRUE	TRUE	TRUE	#35978f
2	Gypsy-21_PBa-LTR	TRUE	TRUE	TRUE	#35978f
2	Gypsy-26_PSo-I	TRUE	TRUE	TRUE	#35978f
2	Gypsy-27_MLP-I	TRUE	TRUE	TRUE	#35978f
2	Gypsy-2_DSe-I	TRUE	TRUE	TRUE	#35978f
2	Gypsy37-I_AG	TRUE	TRUE	TRUE	#35978f
2	Gypsy38-I_DR	TRUE	TRUE	TRUE	#35978f
2	Gypsy-40_PT-I	TRUE	TRUE	TRUE	#35978f
2	Gypsy-57_SB-I	TRUE	TRUE	TRUE	#35978f
2	Gypsy-5_DSim-I	TRUE	TRUE	TRUE	#35978f
2	Gypsy-71_BG-I	TRUE	TRUE	TRUE	#35978f
2	Gypsy-74-I_ZM	TRUE	TRUE	TRUE	#35978f
2	Gypsy-8_HMM-LTR	TRUE	TRUE	TRUE	#35978f
2	Gypsy-9_DPu-I	TRUE	TRUE	TRUE	#35978f
2	hAT-16N2_LMi	TRUE	TRUE	TRUE	#35978f
2	hAT-310_Ami	TRUE	TRUE	TRUE	#35978f
2	hAT-47_HM	TRUE	TRUE	TRUE	#35978f
2	hAT-N107_DR	TRUE	TRUE	TRUE	#35978f
2	HATN11B_DR	TRUE	TRUE	TRUE	#35978f
2	hAT-N1_SP	TRUE	TRUE	TRUE	#35978f
2	hAT-N34_DR	TRUE	TRUE	TRUE	#35978f
2	hAT-N36B_DR	TRUE	TRUE	TRUE	#35978f
2	hAT-N47B_DR	TRUE	TRUE	TRUE	#35978f
2	hATN-4_ACar	TRUE	TRUE	TRUE	#35978f
2	HELITRON7_CB	TRUE	TRUE	TRUE	#35978f
2	Helitron-N2_DR	TRUE	TRUE	TRUE	#35978f
2	Helitron-N35_CGi	TRUE	TRUE	TRUE	#35978f
2	IDEFIX_I-int	TRUE	TRUE	TRUE	#35978f
2	Kolobok-2_AP	TRUE	TRUE	TRUE	#35978f
2	Kolobok-7_CGi	TRUE	TRUE	TRUE	#35978f
2	L1-67_DR	TRUE	TRUE	TRUE	#35978f
2	L1Hylob	TRUE	TRUE	TRUE	#35978f
2	LatiHarb1-2	TRUE	TRUE	TRUE	#35978f
2	LTR1A2_ML	TRUE	TRUE	TRUE	#35978f
2	MamSINE1	TRUE	TRUE	TRUE	#35978f
2	Mariner-13_SIn	TRUE	TRUE	TRUE	#35978f
2	Mariner-N22_HSal	TRUE	TRUE	TRUE	#35978f
2	Mariner-N6_SIn	TRUE	TRUE	TRUE	#35978f
2	Merlin-1_Aplcal	TRUE	TRUE	TRUE	#35978f
2	MINISAT2_CB	TRUE	TRUE	TRUE	#35978f
2	MinoAg1	TRUE	TRUE	TRUE	#35978f
2	MuDR1_ZM	TRUE	TRUE	TRUE	#35978f
2	Neptune3_Ren	TRUE	TRUE	TRUE	#35978f
2	Penelope-12_HM	TRUE	TRUE	TRUE	#35978f
2	Polinton-1N1_DR	TRUE	TRUE	TRUE	#35978f
2	Polinton-1_SP	TRUE	TRUE	TRUE	#35978f
2	Polinton-5_SP	TRUE	TRUE	TRUE	#35978f
2	Proto1-2_NG	TRUE	TRUE	TRUE	#35978f
2	RNLTR15A2	TRUE	TRUE	TRUE	#35978f
2	SINE2-1_Pca	TRUE	TRUE	TRUE	#35978f
2	SR2A	TRUE	TRUE	TRUE	#35978f
2	TE-2_XT	TRUE	TRUE	TRUE	#35978f
2	TE-8_CGi	TRUE	TRUE	TRUE	#35978f
2	TIRANT_I-int	TRUE	TRUE	TRUE	#35978f
2	TRAS1	TRUE	TRUE	TRUE	#35978f
2	Tx1-4_SK	TRUE	TRUE	TRUE	#35978f
2	U2	TRUE	TRUE	TRUE	#35978f
2	Ves2_ML	TRUE	TRUE	TRUE	#35978f
2	Academ-1_CGi	TRUE	FALSE	FALSE	#dfc27d
2	Academ-1_HM	TRUE	FALSE	FALSE	#dfc27d
2	Academ-1_NV	TRUE	FALSE	FALSE	#dfc27d
2	Academ-3_ADi	TRUE	FALSE	FALSE	#dfc27d
2	Academ-3_HM	TRUE	FALSE	FALSE	#dfc27d
2	Academ-3_SK	TRUE	FALSE	FALSE	#dfc27d
2	ACROBAT1	TRUE	FALSE	FALSE	#dfc27d
2	Ambal-3N1_FCy	TRUE	FALSE	FALSE	#dfc27d
2	ATCopia41I	TRUE	FALSE	FALSE	#dfc27d
2	ATENSPM10	TRUE	FALSE	FALSE	#dfc27d
2	BEL-13_LH-I	TRUE	FALSE	FALSE	#dfc27d
2	BEL-21_DWil-I	TRUE	FALSE	FALSE	#dfc27d
2	BEL-47_DRe-I	TRUE	FALSE	FALSE	#dfc27d
2	BEL-5_SI-I	TRUE	FALSE	FALSE	#dfc27d
2	BEL-9_DTa-I	TRUE	FALSE	FALSE	#dfc27d
2	BovB_Oa	TRUE	FALSE	FALSE	#dfc27d
2	BURDOCK_I-int	TRUE	FALSE	FALSE	#dfc27d
2	CASAT_HD	TRUE	FALSE	FALSE	#dfc27d
2	Caulimovirus-1_VVi	TRUE	FALSE	FALSE	#dfc27d
2	Chapaev-10_HM	TRUE	FALSE	FALSE	#dfc27d
2	Chapaev-1_BF	TRUE	FALSE	FALSE	#dfc27d
2	Chapaev-2_BF	TRUE	FALSE	FALSE	#dfc27d
2	Chapaev-3B_HM	TRUE	FALSE	FALSE	#dfc27d
2	CLOUD-4	FALSE	TRUE	FALSE	#dfc27d
2	CLOUD-7	FALSE	TRUE	FALSE	#dfc27d
2	COP7_I_MT-int	TRUE	FALSE	FALSE	#dfc27d
2	Copia12-ZM_I-int	TRUE	FALSE	FALSE	#dfc27d
2	Copia-1_PAb-I	TRUE	FALSE	FALSE	#dfc27d
2	Copia-2_DYa-I	TRUE	FALSE	FALSE	#dfc27d
2	Copia-35_MLP-I	TRUE	FALSE	FALSE	#dfc27d
2	Copia-45_FV-I	TRUE	FALSE	FALSE	#dfc27d
2	Copia-54_GM-I	TRUE	FALSE	FALSE	#dfc27d
2	Copia-56_ST-I	TRUE	FALSE	FALSE	#dfc27d
2	Copia-5_SMo-I	TRUE	FALSE	FALSE	#dfc27d
2	Copia-71_MLP-I	TRUE	FALSE	FALSE	#dfc27d
2	Copia-71_ZM-I	TRUE	FALSE	FALSE	#dfc27d
2	Copia-72_ST-I	TRUE	FALSE	FALSE	#dfc27d
2	Copia-77_BRa-I	TRUE	FALSE	FALSE	#dfc27d
2	Copia-81_BRa-I	TRUE	FALSE	FALSE	#dfc27d
2	Copia-81_SB-I	TRUE	FALSE	FALSE	#dfc27d
2	Copia-85_VV-I	TRUE	FALSE	FALSE	#dfc27d
2	Copia-8_CP-I	TRUE	FALSE	FALSE	#dfc27d
2	Copia-8_SMo-I	TRUE	FALSE	FALSE	#dfc27d
2	Copia-9_Ano-I	TRUE	FALSE	FALSE	#dfc27d
2	Copia-9_FV-I	TRUE	FALSE	FALSE	#dfc27d
2	COPIO_I-int	TRUE	FALSE	FALSE	#dfc27d
2	CR1-12_CGi	TRUE	FALSE	FALSE	#dfc27d
2	CR1-13_NV	TRUE	FALSE	FALSE	#dfc27d
2	CR1-16_BF	TRUE	FALSE	FALSE	#dfc27d
2	CR1-18_NV	TRUE	FALSE	FALSE	#dfc27d
2	CR1_1a_Xt	TRUE	FALSE	FALSE	#dfc27d
2	CR1-1_BF	TRUE	FALSE	FALSE	#dfc27d
2	CR1-1_HM	TRUE	FALSE	FALSE	#dfc27d
2	CR1-1_LG	TRUE	FALSE	FALSE	#dfc27d
2	CR1-22_HM	TRUE	FALSE	FALSE	#dfc27d
2	CR1-23_BF	TRUE	FALSE	FALSE	#dfc27d
2	CR1-23_HM	TRUE	FALSE	FALSE	#dfc27d
2	CR1-24_BF	TRUE	FALSE	FALSE	#dfc27d
2	CR1-27_HM	TRUE	FALSE	FALSE	#dfc27d
2	CR1-2_CPB	TRUE	FALSE	FALSE	#dfc27d
2	CR1-2_DF	TRUE	FALSE	FALSE	#dfc27d
2	CR1-31_BF	TRUE	FALSE	FALSE	#dfc27d
2	CR1-32_BF	TRUE	FALSE	FALSE	#dfc27d
2	CR1-3_BF	TRUE	FALSE	FALSE	#dfc27d
2	CR1-3_DPer	TRUE	FALSE	FALSE	#dfc27d
2	CR1-44_BF	TRUE	FALSE	FALSE	#dfc27d
2	CR1-48_AAe	TRUE	FALSE	FALSE	#dfc27d
2	CR1-49_BF	TRUE	FALSE	FALSE	#dfc27d
2	CR1-51_DR	TRUE	FALSE	FALSE	#dfc27d
2	CR1-5_NV	TRUE	FALSE	FALSE	#dfc27d
2	CR1-6_BF	TRUE	FALSE	FALSE	#dfc27d
2	CR1-70_HM	TRUE	FALSE	FALSE	#dfc27d
2	CR1-7_CGi	TRUE	FALSE	FALSE	#dfc27d
2	CR1-7_SP	TRUE	FALSE	FALSE	#dfc27d
2	CR1-83_HM	TRUE	FALSE	FALSE	#dfc27d
2	CR1-85_HM	TRUE	FALSE	FALSE	#dfc27d
2	CR1-8_AG	TRUE	FALSE	FALSE	#dfc27d
2	CR1-8_DTa	TRUE	FALSE	FALSE	#dfc27d
2	CR1-8_SP	TRUE	FALSE	FALSE	#dfc27d
2	CR1-9_CGi	TRUE	FALSE	FALSE	#dfc27d
2	CR1-9_HM	TRUE	FALSE	FALSE	#dfc27d
2	CR1-9_SP	TRUE	FALSE	FALSE	#dfc27d
2	CR1-D2	TRUE	FALSE	FALSE	#dfc27d
2	CR1_Ele35	TRUE	FALSE	FALSE	#dfc27d
2	Crack-13_AAe	TRUE	FALSE	FALSE	#dfc27d
2	Crack-17_AAe	TRUE	FALSE	FALSE	#dfc27d
2	Crack-17_BF	TRUE	FALSE	FALSE	#dfc27d
2	Crack-1_BF	TRUE	FALSE	FALSE	#dfc27d
2	Crack-29_BF	TRUE	FALSE	FALSE	#dfc27d
2	Crack-2_BF	TRUE	FALSE	FALSE	#dfc27d
2	Crack-2_CP	TRUE	FALSE	FALSE	#dfc27d
2	Crack-34_AAe	TRUE	FALSE	FALSE	#dfc27d
2	Crack-3_BF	TRUE	FALSE	FALSE	#dfc27d
2	Crack-6_AAe	TRUE	FALSE	FALSE	#dfc27d
2	Crack-8_HMa	TRUE	FALSE	FALSE	#dfc27d
2	CRATA	TRUE	FALSE	FALSE	#dfc27d
2	Cre-1_HM	TRUE	FALSE	FALSE	#dfc27d
2	Cre-1_NV	TRUE	FALSE	FALSE	#dfc27d
2	Dada-tA_DR	TRUE	FALSE	FALSE	#dfc27d
2	Dada-tY_PMar	TRUE	FALSE	FALSE	#dfc27d
2	Daphne-16_HMa	TRUE	FALSE	FALSE	#dfc27d
2	Daphne-17_SP	TRUE	FALSE	FALSE	#dfc27d
2	Daphne-1_SK	TRUE	FALSE	FALSE	#dfc27d
2	Daphne-1_TCa	TRUE	FALSE	FALSE	#dfc27d
2	Daphne-2_NV	TRUE	FALSE	FALSE	#dfc27d
2	Daphne-2_SK	TRUE	FALSE	FALSE	#dfc27d
2	Daphne-3_SK	TRUE	FALSE	FALSE	#dfc27d
2	DEL_LH_I-int	TRUE	FALSE	FALSE	#dfc27d
2	DIRS-1_BF	TRUE	FALSE	FALSE	#dfc27d
2	DIRS-1_CGi	TRUE	FALSE	FALSE	#dfc27d
2	DIRS-2_SK	TRUE	FALSE	FALSE	#dfc27d
2	DIRS-3_NV	TRUE	FALSE	FALSE	#dfc27d
2	DIRS-7_NV	TRUE	FALSE	FALSE	#dfc27d
2	DIRS-8_Lch	TRUE	FALSE	FALSE	#dfc27d
2	DMCR1A	TRUE	FALSE	FALSE	#dfc27d
2	DNA10_Lch	TRUE	FALSE	FALSE	#dfc27d
2	DNA-10_NV	TRUE	FALSE	FALSE	#dfc27d
2	DNA2-10_DR	TRUE	FALSE	FALSE	#dfc27d
2	DNA-2-10_NV	TRUE	FALSE	FALSE	#dfc27d
2	DNA-2-24B_DR	TRUE	FALSE	FALSE	#dfc27d
2	DNA3-10_CGi	TRUE	FALSE	FALSE	#dfc27d
2	DNA3-11_CGi	TRUE	FALSE	FALSE	#dfc27d
2	DNA-3-1_NV	TRUE	FALSE	FALSE	#dfc27d
2	DNA3-1_STu	TRUE	FALSE	FALSE	#dfc27d
2	DNA-3-2_PTr	TRUE	FALSE	FALSE	#dfc27d
2	DNA-3-4_NV	TRUE	FALSE	FALSE	#dfc27d
2	DNA36_Lch	TRUE	FALSE	FALSE	#dfc27d
2	DNA-3-6_NV	TRUE	FALSE	FALSE	#dfc27d
2	DNA-4-1_NV	TRUE	FALSE	FALSE	#dfc27d
2	DNA4-42B_CGi	TRUE	FALSE	FALSE	#dfc27d
2	DNA4-6_CGi	TRUE	FALSE	FALSE	#dfc27d
2	DNA-4A_NV	TRUE	FALSE	FALSE	#dfc27d
2	DNA-4_NV	TRUE	FALSE	FALSE	#dfc27d
2	DNA-5-11_NV	TRUE	FALSE	FALSE	#dfc27d
2	DNA-5-19_NV	TRUE	FALSE	FALSE	#dfc27d
2	DNA-5-8_NV	TRUE	FALSE	FALSE	#dfc27d
2	DNA6-4_DR	TRUE	FALSE	FALSE	#dfc27d
2	DNA-6_NV	TRUE	FALSE	FALSE	#dfc27d
2	DNA-7-12_NV	TRUE	FALSE	FALSE	#dfc27d
2	DNA-7-20_NV	TRUE	FALSE	FALSE	#dfc27d
2	DNA-7_NV	TRUE	FALSE	FALSE	#dfc27d
2	DNA-9-10_NV	TRUE	FALSE	FALSE	#dfc27d
2	DNA9-5_DR	TRUE	FALSE	FALSE	#dfc27d
2	DNA-9_NV	TRUE	FALSE	FALSE	#dfc27d
2	DNA-AATT-1_NV	TRUE	FALSE	FALSE	#dfc27d
2	DNA-TA-12_NV	TRUE	FALSE	FALSE	#dfc27d
2	DNA-TA-26A_NV	TRUE	FALSE	FALSE	#dfc27d
2	DNA-TA-26_NV	TRUE	FALSE	FALSE	#dfc27d
2	DNA-TA-5_NV	TRUE	FALSE	FALSE	#dfc27d
2	DNA-TA-6_NV	TRUE	FALSE	FALSE	#dfc27d
2	DNA-TA-8_NV	TRUE	FALSE	FALSE	#dfc27d
2	Dong2_FR	TRUE	FALSE	FALSE	#dfc27d
2	DOPPIA4_ZM	TRUE	FALSE	FALSE	#dfc27d
2	EnSpm-11_OS	TRUE	FALSE	FALSE	#dfc27d
2	EnSpm-16_HM	TRUE	FALSE	FALSE	#dfc27d
2	EnSpm-1_TA	TRUE	FALSE	FALSE	#dfc27d
2	ENSPM1_VV	TRUE	FALSE	FALSE	#dfc27d
2	EnSpm-2_BF	TRUE	FALSE	FALSE	#dfc27d
2	EnSpm-2_HM	TRUE	FALSE	FALSE	#dfc27d
2	EnSpm-2_NV	TRUE	FALSE	FALSE	#dfc27d
2	EnSpm-2_NVi	TRUE	FALSE	FALSE	#dfc27d
2	EnSpm-43_SBi	TRUE	FALSE	FALSE	#dfc27d
2	EnSpm-5_DR	TRUE	FALSE	FALSE	#dfc27d
2	G4_DM	TRUE	FALSE	FALSE	#dfc27d
2	Gypsy-106_AA-I	TRUE	FALSE	FALSE	#dfc27d
2	Gypsy1-1-I_Lch	TRUE	FALSE	FALSE	#dfc27d
2	Gypsy-12_DSim-I	TRUE	FALSE	FALSE	#dfc27d
2	Gypsy-136_GM-I	TRUE	FALSE	FALSE	#dfc27d
2	Gypsy-138_SBi-I	TRUE	FALSE	FALSE	#dfc27d
2	Gypsy-14_CPB-I	TRUE	FALSE	FALSE	#dfc27d
2	Gypsy-14_LCh-I	TRUE	FALSE	FALSE	#dfc27d
2	Gypsy158-I_DR	TRUE	FALSE	FALSE	#dfc27d
2	Gypsy-15-I_XT	TRUE	FALSE	FALSE	#dfc27d
2	Gypsy-15_LBS-I	TRUE	FALSE	FALSE	#dfc27d
2	Gypsy-18_HM-I	TRUE	FALSE	FALSE	#dfc27d
2	Gypsy-19-I_XT	TRUE	FALSE	FALSE	#dfc27d
2	Gypsy-20_CSa-I	TRUE	FALSE	FALSE	#dfc27d
2	Gypsy-20_GA-I	TRUE	FALSE	FALSE	#dfc27d
2	Gypsy-210_DR-I	TRUE	FALSE	FALSE	#dfc27d
2	Gypsy-21_LCh-I	TRUE	FALSE	FALSE	#dfc27d
2	Gypsy-229_AA-I	TRUE	FALSE	FALSE	#dfc27d
2	Gypsy-24_XT-I	TRUE	FALSE	FALSE	#dfc27d
2	Gypsy-27_XT-I	TRUE	FALSE	FALSE	#dfc27d
2	Gypsy-29_DWil-I	TRUE	FALSE	FALSE	#dfc27d
2	Gypsy-34-I_DR	TRUE	FALSE	FALSE	#dfc27d
2	Gypsy-3_CSa-I	TRUE	FALSE	FALSE	#dfc27d
2	Gypsy-3-I_NV	TRUE	FALSE	FALSE	#dfc27d
2	Gypsy-3_LCh-I	TRUE	FALSE	FALSE	#dfc27d
2	Gypsy3-LTR_AP	TRUE	FALSE	FALSE	#dfc27d
2	Gypsy-41_GA-I	FALSE	TRUE	FALSE	#dfc27d
2	Gypsy-43_DWil-I	TRUE	FALSE	FALSE	#dfc27d
2	Gypsy-46_CGi-I	TRUE	FALSE	FALSE	#dfc27d
2	Gypsy-46_Mad-I	TRUE	FALSE	FALSE	#dfc27d
2	Gypsy-47-I_NV	TRUE	FALSE	FALSE	#dfc27d
2	Gypsy-49_CGi-I	TRUE	FALSE	FALSE	#dfc27d
2	Gypsy4-SM_I-int	TRUE	FALSE	FALSE	#dfc27d
2	Gypsy-50_Croc-I	TRUE	FALSE	FALSE	#dfc27d
2	Gypsy-52-I_NV	TRUE	FALSE	FALSE	#dfc27d
2	Gypsy-5_AMi-I	TRUE	FALSE	FALSE	#dfc27d
2	Gypsy-5_DBp-I	TRUE	FALSE	FALSE	#dfc27d
2	Gypsy5_I-int	TRUE	FALSE	FALSE	#dfc27d
2	Gypsy5-I_SP	TRUE	FALSE	FALSE	#dfc27d
2	Gypsy-62_BG-LTR	FALSE	TRUE	FALSE	#dfc27d
2	Gypsy-63_CGi-I	TRUE	FALSE	FALSE	#dfc27d
2	Gypsy-6_CSa-I	TRUE	FALSE	FALSE	#dfc27d
2	Gypsy-6_LCh-I	TRUE	FALSE	FALSE	#dfc27d
2	Gypsy-71_CGi-I	TRUE	FALSE	FALSE	#dfc27d
2	Gypsy-7-I_NV	TRUE	FALSE	FALSE	#dfc27d
2	Gypsy-8_CGi-I	TRUE	FALSE	FALSE	#dfc27d
2	Gypsy92-I_DR	TRUE	FALSE	FALSE	#dfc27d
2	Gypsy-9_RP-I	TRUE	FALSE	FALSE	#dfc27d
2	Harb_Cis1	TRUE	FALSE	FALSE	#dfc27d
2	Harbinger-1N1_NV	TRUE	FALSE	FALSE	#dfc27d
2	Harbinger-1_XT	TRUE	FALSE	FALSE	#dfc27d
2	Harbinger2-1_NV	TRUE	FALSE	FALSE	#dfc27d
2	Harbinger2N_TP	TRUE	FALSE	FALSE	#dfc27d
2	Harbinger-N16_DR	TRUE	FALSE	FALSE	#dfc27d
2	Harbinger-N1_NV	TRUE	FALSE	FALSE	#dfc27d
2	Harbinger-N1_SK	TRUE	FALSE	FALSE	#dfc27d
2	Harbinger-N22_NV	TRUE	FALSE	FALSE	#dfc27d
2	Harbinger-N2_NV	TRUE	FALSE	FALSE	#dfc27d
2	Harbinger-N9_NV	TRUE	FALSE	FALSE	#dfc27d
2	hAT-1_DK	TRUE	FALSE	FALSE	#dfc27d
2	hAT-2N1_TC	FALSE	TRUE	FALSE	#dfc27d
2	hAT-3_BF	TRUE	FALSE	FALSE	#dfc27d
2	hAT-3N1_BF	TRUE	FALSE	FALSE	#dfc27d
2	hAT-42_HM	TRUE	FALSE	FALSE	#dfc27d
2	hAT-4_BF	TRUE	FALSE	FALSE	#dfc27d
2	hAT-4N1_BF	TRUE	FALSE	FALSE	#dfc27d
2	hAT5-2_NV	TRUE	FALSE	FALSE	#dfc27d
2	hAT6-N1_NV	TRUE	FALSE	FALSE	#dfc27d
2	hAT-N21_DR	TRUE	FALSE	FALSE	#dfc27d
2	hAT-N22_DR	TRUE	FALSE	FALSE	#dfc27d
2	hAT-N36C_DR	TRUE	FALSE	FALSE	#dfc27d
2	hAT-N3_BF	TRUE	FALSE	FALSE	#dfc27d
2	Helitron-1_DEu	TRUE	FALSE	FALSE	#dfc27d
2	Helitron-1_DT	TRUE	FALSE	FALSE	#dfc27d
2	Helitron-1_NV	TRUE	FALSE	FALSE	#dfc27d
2	Helitron-1_SI	TRUE	FALSE	FALSE	#dfc27d
2	Helitron-2_SIn	TRUE	FALSE	FALSE	#dfc27d
2	Helitron-3_CGi	TRUE	FALSE	FALSE	#dfc27d
2	Helitron-3_PM	TRUE	FALSE	FALSE	#dfc27d
2	Helitron-3_ZM	FALSE	TRUE	FALSE	#dfc27d
2	Helitron-5_DR	TRUE	FALSE	FALSE	#dfc27d
2	Helitron-N2_CGi	TRUE	FALSE	FALSE	#dfc27d
2	Helitron-N2_DT	TRUE	FALSE	FALSE	#dfc27d
2	Helitron-N6_NV	TRUE	FALSE	FALSE	#dfc27d
2	HELMET3	TRUE	FALSE	FALSE	#dfc27d
2	IS4EU-1_BF	TRUE	FALSE	FALSE	#dfc27d
2	ISL2EU-12_CGi	TRUE	FALSE	FALSE	#dfc27d
2	ISL2EU-1_HM	TRUE	FALSE	FALSE	#dfc27d
2	Jockey-2_DGri	FALSE	TRUE	FALSE	#dfc27d
2	Kolobok-1_AQu	TRUE	FALSE	FALSE	#dfc27d
2	Kolobok-2_AQu	TRUE	FALSE	FALSE	#dfc27d
2	Kolobok-N6_NV	TRUE	FALSE	FALSE	#dfc27d
2	L1-3_CR	FALSE	TRUE	FALSE	#dfc27d
2	L2-16_DRe	TRUE	FALSE	FALSE	#dfc27d
2	L2-1_DPu	TRUE	FALSE	FALSE	#dfc27d
2	L2-1_DR	TRUE	FALSE	FALSE	#dfc27d
2	L2-1_SK	TRUE	FALSE	FALSE	#dfc27d
2	L2-3_Cis	TRUE	FALSE	FALSE	#dfc27d
2	L2-5_DRe	TRUE	FALSE	FALSE	#dfc27d
2	L2-9_NVi	TRUE	FALSE	FALSE	#dfc27d
2	LTR18F_ML	TRUE	FALSE	FALSE	#dfc27d
2	Mariner-2_NV	TRUE	FALSE	FALSE	#dfc27d
2	Mariner-4_CPB	TRUE	FALSE	FALSE	#dfc27d
2	MARINER61_CB	TRUE	FALSE	FALSE	#dfc27d
2	Mariner-8_SK	TRUE	FALSE	FALSE	#dfc27d
2	Mariner-N2_SP	TRUE	FALSE	FALSE	#dfc27d
2	Mariner-N3_DR	TRUE	FALSE	FALSE	#dfc27d
2	Mariner-N6_NV	TRUE	FALSE	FALSE	#dfc27d
2	Mariner-N6_PM	TRUE	FALSE	FALSE	#dfc27d
2	Maui	TRUE	FALSE	FALSE	#dfc27d
2	MER132	TRUE	FALSE	FALSE	#dfc27d
2	MINIME_DN	TRUE	FALSE	FALSE	#dfc27d
2	MSAT2-MAR1_NV	TRUE	FALSE	FALSE	#dfc27d
2	MuDR-7_STu	TRUE	FALSE	FALSE	#dfc27d
2	P-34_HM	TRUE	FALSE	FALSE	#dfc27d
2	Penelope-1A_NV	TRUE	FALSE	FALSE	#dfc27d
2	Penelope-1_NV	TRUE	FALSE	FALSE	#dfc27d
2	Penelope-6N1_NV	TRUE	FALSE	FALSE	#dfc27d
2	piggyBac-N1_NV	TRUE	FALSE	FALSE	#dfc27d
2	piggyBac-N2_NV	TRUE	FALSE	FALSE	#dfc27d
2	Polinton-1_HM	TRUE	FALSE	FALSE	#dfc27d
2	Polinton-1_PBa	TRUE	FALSE	FALSE	#dfc27d
2	Polinton-1_XT	TRUE	FALSE	FALSE	#dfc27d
2	Polinton-2_DBi	TRUE	FALSE	FALSE	#dfc27d
2	Polinton-3_TC	TRUE	FALSE	FALSE	#dfc27d
2	Polinton-5_NV	TRUE	FALSE	FALSE	#dfc27d
2	RNSAT1c	TRUE	FALSE	FALSE	#dfc27d
2	RTE-3_CPB	TRUE	FALSE	FALSE	#dfc27d
2	RTEX-17_SK	TRUE	FALSE	FALSE	#dfc27d
2	RTEX-18_SK	TRUE	FALSE	FALSE	#dfc27d
2	RTEX-24_SK	TRUE	FALSE	FALSE	#dfc27d
2	RTEX-3_SK	TRUE	FALSE	FALSE	#dfc27d
2	RTEX-5_SK	TRUE	FALSE	FALSE	#dfc27d
2	RTEX-7_SK	TRUE	FALSE	FALSE	#dfc27d
2	SAT-12_DR	TRUE	FALSE	FALSE	#dfc27d
2	SAT-1_NV	TRUE	FALSE	FALSE	#dfc27d
2	SINE2-1_NV	TRUE	FALSE	FALSE	#dfc27d
2	SINE2-1_SSc	TRUE	FALSE	FALSE	#dfc27d
2	SINE2-2_NV	TRUE	FALSE	FALSE	#dfc27d
2	SINE2-3_NV	TRUE	FALSE	FALSE	#dfc27d
2	SINE2-4_NV	TRUE	FALSE	FALSE	#dfc27d
2	SINE2-5_NV	TRUE	FALSE	FALSE	#dfc27d
2	Sola3-1_CapOwc	FALSE	TRUE	FALSE	#dfc27d
2	Sola3-2_NV	TRUE	FALSE	FALSE	#dfc27d
2	SPMLIKE	TRUE	FALSE	FALSE	#dfc27d
2	TE-10_NV	TRUE	FALSE	FALSE	#dfc27d
2	TE-1_NV	TRUE	FALSE	FALSE	#dfc27d
2	TE-20_NV	TRUE	FALSE	FALSE	#dfc27d
2	TE-24_NV	TRUE	FALSE	FALSE	#dfc27d
2	TE-2_NV	TRUE	FALSE	FALSE	#dfc27d
2	TE-3_NV	TRUE	FALSE	FALSE	#dfc27d
2	TE-4_NV	TRUE	FALSE	FALSE	#dfc27d
2	TE-8_NV	TRUE	FALSE	FALSE	#dfc27d
2	Transib-1_HM	TRUE	FALSE	FALSE	#dfc27d
2	TRNALysTTT_CB	TRUE	FALSE	FALSE	#dfc27d
2	Tx1-14_SK	TRUE	FALSE	FALSE	#dfc27d
2	Tx1-25_DR	TRUE	FALSE	FALSE	#dfc27d
2	U4	TRUE	FALSE	FALSE	#dfc27d
2	U5	TRUE	FALSE	FALSE	#dfc27d
2	XILON1_ZM-int	FALSE	TRUE	FALSE	#dfc27d
2	Zator-1_BF	TRUE	FALSE	FALSE	#dfc27d
1	7SLRNA	TRUE	FALSE	FALSE	#dfc27d
1	AACopia1_I-int	TRUE	FALSE	FALSE	#dfc27d
1	AC9_ZM	TRUE	FALSE	FALSE	#dfc27d
1	Academ-1_AMi	TRUE	FALSE	FALSE	#dfc27d
1	Academ-1_BF	TRUE	FALSE	FALSE	#dfc27d
1	Academ-1_Lgigantea	TRUE	FALSE	FALSE	#dfc27d
1	Academ-1_SP	TRUE	FALSE	FALSE	#dfc27d
1	Academ-2_BF	TRUE	FALSE	FALSE	#dfc27d
1	Academ-2_Lgigantea	TRUE	FALSE	FALSE	#dfc27d
1	Academ-2_SP	TRUE	FALSE	FALSE	#dfc27d
1	Academ-4_SK	TRUE	FALSE	FALSE	#dfc27d
1	Academ-7_SK	TRUE	FALSE	FALSE	#dfc27d
1	Academ-8_SK	TRUE	FALSE	FALSE	#dfc27d
1	ACASINE2	TRUE	FALSE	FALSE	#dfc27d
1	ACCORD2_I-int	TRUE	FALSE	FALSE	#dfc27d
1	ACCORD2_LTR	TRUE	FALSE	FALSE	#dfc27d
1	AeHerves2	TRUE	FALSE	FALSE	#dfc27d
1	AeTango2	TRUE	FALSE	FALSE	#dfc27d
1	AFLAV_I-int	TRUE	FALSE	FALSE	#dfc27d
1	AFLAV_LTR	TRUE	FALSE	FALSE	#dfc27d
1	AgaP8	TRUE	FALSE	FALSE	#dfc27d
1	Ag-CR1-22	TRUE	FALSE	FALSE	#dfc27d
1	ALBERT_TA	TRUE	FALSE	FALSE	#dfc27d
1	Alu2_TS	TRUE	FALSE	FALSE	#dfc27d
1	AluJb	TRUE	FALSE	FALSE	#dfc27d
1	AluJo	TRUE	FALSE	FALSE	#dfc27d
1	AluJr	TRUE	FALSE	FALSE	#dfc27d
1	AluSc	TRUE	FALSE	FALSE	#dfc27d
1	AluSc5	TRUE	FALSE	FALSE	#dfc27d
1	AluSc8	TRUE	FALSE	FALSE	#dfc27d
1	AluSg	TRUE	FALSE	FALSE	#dfc27d
1	AluSg4	TRUE	FALSE	FALSE	#dfc27d
1	AluSg7	TRUE	FALSE	FALSE	#dfc27d
1	AluSp	TRUE	FALSE	FALSE	#dfc27d
1	AluSq	TRUE	FALSE	FALSE	#dfc27d
1	AluSq2	TRUE	FALSE	FALSE	#dfc27d
1	AluSx	TRUE	FALSE	FALSE	#dfc27d
1	AluSx1	TRUE	FALSE	FALSE	#dfc27d
1	AluSx3	TRUE	FALSE	FALSE	#dfc27d
1	AluSx4	TRUE	FALSE	FALSE	#dfc27d
1	AluSz	TRUE	FALSE	FALSE	#dfc27d
1	AluSz6	TRUE	FALSE	FALSE	#dfc27d
1	AluY	TRUE	FALSE	FALSE	#dfc27d
1	AluYa5	TRUE	FALSE	FALSE	#dfc27d
1	AluYGibC1	TRUE	FALSE	FALSE	#dfc27d
1	AluYj4	TRUE	FALSE	FALSE	#dfc27d
1	AluYm1	TRUE	FALSE	FALSE	#dfc27d
1	Ambal-2_FCy	FALSE	TRUE	FALSE	#dfc27d
1	Ambal-2_TP	FALSE	TRUE	FALSE	#dfc27d
1	AmnL2-1	TRUE	FALSE	FALSE	#dfc27d
1	AmnSINE1	TRUE	FALSE	FALSE	#dfc27d
1	Angela1_AT_I-int	TRUE	FALSE	FALSE	#dfc27d
1	Angela1_AT_LTR	TRUE	FALSE	FALSE	#dfc27d
1	ArnoldY1	TRUE	FALSE	FALSE	#dfc27d
1	ArnoldY2	FALSE	TRUE	FALSE	#dfc27d
1	ARS406_DM	TRUE	FALSE	FALSE	#dfc27d
1	ATCopia11I	TRUE	FALSE	FALSE	#dfc27d
1	ATCopia13I	TRUE	FALSE	FALSE	#dfc27d
1	ATCopia16I	TRUE	FALSE	FALSE	#dfc27d
1	ATCopia20I	FALSE	TRUE	FALSE	#dfc27d
1	ATCopia50_I-int	TRUE	FALSE	FALSE	#dfc27d
1	ATCopia57_I-int	FALSE	TRUE	FALSE	#dfc27d
1	ATCopia58LTR	TRUE	FALSE	FALSE	#dfc27d
1	ATCopia60_I-int	TRUE	FALSE	FALSE	#dfc27d
1	ATCopia6I	FALSE	TRUE	FALSE	#dfc27d
1	ATCopia71_I-int	FALSE	TRUE	FALSE	#dfc27d
1	ATCopia79LTR	FALSE	TRUE	FALSE	#dfc27d
1	ATCopia84_I-int	TRUE	FALSE	FALSE	#dfc27d
1	ATCopia85_I-int	TRUE	FALSE	FALSE	#dfc27d
1	ATCopia90_I-int	TRUE	FALSE	FALSE	#dfc27d
1	ATCopia95LTR	TRUE	FALSE	FALSE	#dfc27d
1	ATCopia97_I-int	FALSE	TRUE	FALSE	#dfc27d
1	ATDNA1T9A	TRUE	FALSE	FALSE	#dfc27d
1	ATDNA2T9C	TRUE	FALSE	FALSE	#dfc27d
1	ATENSAT1	TRUE	FALSE	FALSE	#dfc27d
1	ATENSPM12	TRUE	FALSE	FALSE	#dfc27d
1	ATENSPM2	TRUE	FALSE	FALSE	#dfc27d
1	ATENSPM3	TRUE	FALSE	FALSE	#dfc27d
1	ATENSPM6	TRUE	FALSE	FALSE	#dfc27d
1	ATENSPM9	TRUE	FALSE	FALSE	#dfc27d
1	ATGP10_I-int	FALSE	TRUE	FALSE	#dfc27d
1	ATGP2-I	TRUE	FALSE	FALSE	#dfc27d
1	ATGP3I	TRUE	FALSE	FALSE	#dfc27d
1	ATGP5A_I-int	FALSE	TRUE	FALSE	#dfc27d
1	ATHATN10	FALSE	TRUE	FALSE	#dfc27d
1	Athila0_I-int	FALSE	TRUE	FALSE	#dfc27d
1	Athila4_I-int	TRUE	FALSE	FALSE	#dfc27d
1	Athila6A_I-int	TRUE	FALSE	FALSE	#dfc27d
1	Athila7_I-int	TRUE	FALSE	FALSE	#dfc27d
1	ATHILA-7_SBi-I	TRUE	FALSE	FALSE	#dfc27d
1	Athila8A_I-int	TRUE	FALSE	FALSE	#dfc27d
1	Athila8B_I-int	FALSE	TRUE	FALSE	#dfc27d
1	Athila_I-int	FALSE	TRUE	FALSE	#dfc27d
1	Atlantys2_I-int	TRUE	FALSE	FALSE	#dfc27d
1	ATLANTYS-I_OS	TRUE	FALSE	FALSE	#dfc27d
1	ATLINEIII	FALSE	TRUE	FALSE	#dfc27d
1	ATMU10	FALSE	TRUE	FALSE	#dfc27d
1	ATMU6	TRUE	FALSE	FALSE	#dfc27d
1	ATREP18	TRUE	FALSE	FALSE	#dfc27d
1	AVPB1	TRUE	FALSE	FALSE	#dfc27d
1	AvPB2	FALSE	TRUE	FALSE	#dfc27d
1	Baggins1	TRUE	FALSE	FALSE	#dfc27d
1	Baggins-1_NVi	TRUE	FALSE	FALSE	#dfc27d
1	BARI1	TRUE	FALSE	FALSE	#dfc27d
1	BARI_DM	TRUE	FALSE	FALSE	#dfc27d
1	BATUMI_I-int	TRUE	FALSE	FALSE	#dfc27d
1	BATUMI_LTR	TRUE	FALSE	FALSE	#dfc27d
1	BCBOTYPOL	TRUE	FALSE	FALSE	#dfc27d
1	BEL-106_AA-I	TRUE	FALSE	FALSE	#dfc27d
1	BEL-10_Adi-I	TRUE	FALSE	FALSE	#dfc27d
1	BEL-10_DPu-I	TRUE	FALSE	FALSE	#dfc27d
1	BEL-10_GA-I	TRUE	FALSE	FALSE	#dfc27d
1	BEL-10-I_NV	TRUE	FALSE	FALSE	#dfc27d
1	BEL-10_NV-I	TRUE	FALSE	FALSE	#dfc27d
1	BEL-110_AA-I	TRUE	FALSE	FALSE	#dfc27d
1	BEL-11_CGi-I	FALSE	TRUE	FALSE	#dfc27d
1	BEL-11_CSa-I	TRUE	FALSE	FALSE	#dfc27d
1	BEL-11_DBp-I	TRUE	FALSE	FALSE	#dfc27d
1	BEL-11-I_NV	TRUE	FALSE	FALSE	#dfc27d
1	BEL-12_Adi-I	TRUE	FALSE	FALSE	#dfc27d
1	BEL-12_CQ-LTR	TRUE	FALSE	FALSE	#dfc27d
1	BEL-13_Adi-I	TRUE	FALSE	FALSE	#dfc27d
1	BEL-13_CGi-I	TRUE	FALSE	FALSE	#dfc27d
1	BEL-13_DEl-I	TRUE	FALSE	FALSE	#dfc27d
1	BEL13-I_DR	TRUE	FALSE	FALSE	#dfc27d
1	BEL-145_AA-I	TRUE	FALSE	FALSE	#dfc27d
1	BEL-14_AA-I	TRUE	FALSE	FALSE	#dfc27d
1	BEL-14_DPu-I	TRUE	FALSE	FALSE	#dfc27d
1	BEL-155_AA-I	TRUE	FALSE	FALSE	#dfc27d
1	BEL-155_AA-LTR	TRUE	FALSE	FALSE	#dfc27d
1	BEL-159_AA-LTR	TRUE	FALSE	FALSE	#dfc27d
1	BEL-16_Adi-I	TRUE	FALSE	FALSE	#dfc27d
1	BEL-178_AA-I	TRUE	FALSE	FALSE	#dfc27d
1	BEL-17_Adi-I	TRUE	FALSE	FALSE	#dfc27d
1	BEL-17_CGi-I	TRUE	FALSE	FALSE	#dfc27d
1	BEL-18_CQ-LTR	FALSE	TRUE	FALSE	#dfc27d
1	BEL-19_AA-I	TRUE	FALSE	FALSE	#dfc27d
1	BEL-1_Adi-I	TRUE	FALSE	FALSE	#dfc27d
1	BEL-1_BM-I	TRUE	FALSE	FALSE	#dfc27d
1	BEL-1_CGi-I	FALSE	TRUE	FALSE	#dfc27d
1	BEL-1_Deu-LTR	TRUE	FALSE	FALSE	#dfc27d
1	BEL-1_DKi-I	TRUE	FALSE	FALSE	#dfc27d
1	BEL-1_DPu-I	TRUE	FALSE	FALSE	#dfc27d
1	BEL-1_DWil-I	TRUE	FALSE	FALSE	#dfc27d
1	BEL1-I_AG	TRUE	FALSE	FALSE	#dfc27d
1	BEL1-I_Dmoj	TRUE	FALSE	FALSE	#dfc27d
1	BEL-1-I_NVi	TRUE	FALSE	FALSE	#dfc27d
1	BEL-1-I_XT	TRUE	FALSE	FALSE	#dfc27d
1	BEL-1_RP-I	TRUE	FALSE	FALSE	#dfc27d
1	BEL-1_TCa-I	TRUE	FALSE	FALSE	#dfc27d
1	BEL-200_AA-I	TRUE	FALSE	FALSE	#dfc27d
1	BEL-201_AA-I	FALSE	TRUE	FALSE	#dfc27d
1	BEL-20_DTa-I	FALSE	TRUE	FALSE	#dfc27d
1	BEL-212_AA-LTR	TRUE	FALSE	FALSE	#dfc27d
1	BEL-215_AA-I	TRUE	FALSE	FALSE	#dfc27d
1	BEL-216_AA-I	TRUE	FALSE	FALSE	#dfc27d
1	BEL-219_AA-I	TRUE	FALSE	FALSE	#dfc27d
1	BEL-21_DAn-I	TRUE	FALSE	FALSE	#dfc27d
1	BEL-225_AA-I	TRUE	FALSE	FALSE	#dfc27d
1	BEL-22_DTa-I	TRUE	FALSE	FALSE	#dfc27d
1	BEL-236_AA-I	TRUE	FALSE	FALSE	#dfc27d
1	BEL-238_AA-I	TRUE	FALSE	FALSE	#dfc27d
1	BEL-242_AA-I	TRUE	FALSE	FALSE	#dfc27d
1	BEL-24_AA-I	TRUE	FALSE	FALSE	#dfc27d
1	BEL-25_CQ-I	TRUE	FALSE	FALSE	#dfc27d
1	BEL27-I_DR	TRUE	FALSE	FALSE	#dfc27d
1	BEL-29_AA-I	FALSE	TRUE	FALSE	#dfc27d
1	BEL-2_BMa-I	TRUE	FALSE	FALSE	#dfc27d
1	BEL-2_DGri-I	TRUE	FALSE	FALSE	#dfc27d
1	BEL-2_DPu-I	TRUE	FALSE	FALSE	#dfc27d
1	BEL-2_DSe-I	TRUE	FALSE	FALSE	#dfc27d
1	BEL-2_DVir-I	TRUE	FALSE	FALSE	#dfc27d
1	BEL-2_GA-I	TRUE	FALSE	FALSE	#dfc27d
1	BEL-2_HMM-I	TRUE	FALSE	FALSE	#dfc27d
1	BEL2-I_DR	TRUE	FALSE	FALSE	#dfc27d
1	BEL-2_LH-I	TRUE	FALSE	FALSE	#dfc27d
1	BEL2_MH-I	TRUE	FALSE	FALSE	#dfc27d
1	BEL-30_CQ-I	FALSE	TRUE	FALSE	#dfc27d
1	BEL31-I_DR	TRUE	FALSE	FALSE	#dfc27d
1	BEL32-I_DR	TRUE	FALSE	FALSE	#dfc27d
1	BEL32-LTR_DR	TRUE	FALSE	FALSE	#dfc27d
1	BEL-34_CQ-I	TRUE	FALSE	FALSE	#dfc27d
1	BEL-35_AA-I	FALSE	TRUE	FALSE	#dfc27d
1	BEL-36_CQ-I	TRUE	FALSE	FALSE	#dfc27d
1	BEL36-I_DR	TRUE	FALSE	FALSE	#dfc27d
1	BEL-37-I_DR	FALSE	TRUE	FALSE	#dfc27d
1	BEL-38_CQ-I	TRUE	FALSE	FALSE	#dfc27d
1	BEL-39_DRe-I	TRUE	FALSE	FALSE	#dfc27d
1	BEL-3_AEc-I	TRUE	FALSE	FALSE	#dfc27d
1	BEL-3_DPer-I	TRUE	FALSE	FALSE	#dfc27d
1	BEL-3_GA-I	FALSE	TRUE	FALSE	#dfc27d
1	BEL3-I_AG	TRUE	FALSE	FALSE	#dfc27d
1	BEL-3_PMar-I	TRUE	FALSE	FALSE	#dfc27d
1	BEL-40_CQ-LTR	TRUE	FALSE	FALSE	#dfc27d
1	BEL-40_DRe-I	TRUE	FALSE	FALSE	#dfc27d
1	BEL-41_DRe-I	TRUE	FALSE	FALSE	#dfc27d
1	BEL-48_DRe-I	TRUE	FALSE	FALSE	#dfc27d
1	BEL-4_DAn-I	TRUE	FALSE	FALSE	#dfc27d
1	BEL-4_DFi-I	TRUE	FALSE	FALSE	#dfc27d
1	BEL-4_DMoj-I	TRUE	FALSE	FALSE	#dfc27d
1	BEL-4_DPer-I	TRUE	FALSE	FALSE	#dfc27d
1	BEL-4_DPu-I	TRUE	FALSE	FALSE	#dfc27d
1	BEL-4_DWil-I	FALSE	TRUE	FALSE	#dfc27d
1	BEL-4-I_XT	TRUE	FALSE	FALSE	#dfc27d
1	BEL-4_SI-I	TRUE	FALSE	FALSE	#dfc27d
1	BEL-50_CQ-I	TRUE	FALSE	FALSE	#dfc27d
1	BEL-51_AA-I	TRUE	FALSE	FALSE	#dfc27d
1	BEL-54_AA-I	TRUE	FALSE	FALSE	#dfc27d
1	BEL-54_CQ-I	FALSE	TRUE	FALSE	#dfc27d
1	BEL-58_DRe-I	TRUE	FALSE	FALSE	#dfc27d
1	BEL-595_AA-I	TRUE	FALSE	FALSE	#dfc27d
1	BEL-596_AA-I	TRUE	FALSE	FALSE	#dfc27d
1	BEL-5_Adi-I	TRUE	FALSE	FALSE	#dfc27d
1	BEL-5_CGi-I	TRUE	FALSE	FALSE	#dfc27d
1	BEL-5_GA-I	TRUE	FALSE	FALSE	#dfc27d
1	BEL-5-I_XT	TRUE	FALSE	FALSE	#dfc27d
1	BEL-605_AA-I	TRUE	FALSE	FALSE	#dfc27d
1	BEL-606_AA-I	TRUE	FALSE	FALSE	#dfc27d
1	BEL-613_AA-I	TRUE	FALSE	FALSE	#dfc27d
1	BEL-615_AA-I	FALSE	TRUE	FALSE	#dfc27d
1	BEL-617_AA-I	TRUE	FALSE	FALSE	#dfc27d
1	BEL-620_AA-I	TRUE	FALSE	FALSE	#dfc27d
1	BEL-621_AA-I	TRUE	FALSE	FALSE	#dfc27d
1	BEL-634_AA-I	TRUE	FALSE	FALSE	#dfc27d
1	BEL-65_AA-I	TRUE	FALSE	FALSE	#dfc27d
1	BEL-6_AA-LTR	TRUE	FALSE	FALSE	#dfc27d
1	BEL-6_Adi-I	TRUE	FALSE	FALSE	#dfc27d
1	BEL-6_Ano-I	FALSE	TRUE	FALSE	#dfc27d
1	BEL-6_DPe-I	FALSE	TRUE	FALSE	#dfc27d
1	BEL-6_DPer-I	TRUE	FALSE	FALSE	#dfc27d
1	BEL-6_DYa-I	TRUE	FALSE	FALSE	#dfc27d
1	BEL-6-I_NV	TRUE	FALSE	FALSE	#dfc27d
1	BEL-6_LH-I	TRUE	FALSE	FALSE	#dfc27d
1	BEL-7_Adi-I	TRUE	FALSE	FALSE	#dfc27d
1	BEL-7_DAn-I	TRUE	FALSE	FALSE	#dfc27d
1	BEL-7_DPu-I	FALSE	TRUE	FALSE	#dfc27d
1	BEL-7_LH-I	TRUE	FALSE	FALSE	#dfc27d
1	BEL-81_CQ-I	TRUE	FALSE	FALSE	#dfc27d
1	BEL-8_AA-I	TRUE	FALSE	FALSE	#dfc27d
1	BEL-8_Adi-I	TRUE	FALSE	FALSE	#dfc27d
1	BEL-8_DEl-I	TRUE	FALSE	FALSE	#dfc27d
1	BEL-8_DPu-I	TRUE	FALSE	FALSE	#dfc27d
1	BEL-92_AA-I	TRUE	FALSE	FALSE	#dfc27d
1	BEL-94_AA-I	TRUE	FALSE	FALSE	#dfc27d
1	BEL-9_AA-I	TRUE	FALSE	FALSE	#dfc27d
1	BEL-9_Adi-I	TRUE	FALSE	FALSE	#dfc27d
1	BEL-9_DPu	TRUE	FALSE	FALSE	#dfc27d
1	BEL-9_DWil-I	TRUE	FALSE	FALSE	#dfc27d
1	BEL9-I_AG	TRUE	FALSE	FALSE	#dfc27d
1	BEL_I-int	TRUE	FALSE	FALSE	#dfc27d
1	BELPADRE_I-int	TRUE	FALSE	FALSE	#dfc27d
1	BHIKHARI-5-LTR_DR	TRUE	FALSE	FALSE	#dfc27d
1	BHIKHARI_I-int	TRUE	FALSE	FALSE	#dfc27d
1	Bica_I-int	TRUE	FALSE	FALSE	#dfc27d
1	BLACKJACK	TRUE	FALSE	FALSE	#dfc27d
1	BLOOD_I-int	TRUE	FALSE	FALSE	#dfc27d
1	BMC1	TRUE	FALSE	FALSE	#dfc27d
1	BMRP1	TRUE	FALSE	FALSE	#dfc27d
1	Boudicca_INT-int	TRUE	FALSE	FALSE	#dfc27d
1	BovB_Cg	FALSE	TRUE	FALSE	#dfc27d
1	BovB_Dr	TRUE	FALSE	FALSE	#dfc27d
1	BovB_Es	TRUE	FALSE	FALSE	#dfc27d
1	BovB_Plat	TRUE	FALSE	FALSE	#dfc27d
1	BovB_Ta	TRUE	FALSE	FALSE	#dfc27d
1	BOVB_VA	TRUE	FALSE	FALSE	#dfc27d
1	BRENSPM1	FALSE	TRUE	FALSE	#dfc27d
1	BS	TRUE	FALSE	FALSE	#dfc27d
1	BS2	TRUE	FALSE	FALSE	#dfc27d
1	BS3_DM	TRUE	FALSE	FALSE	#dfc27d
1	CACTA-1_AA	TRUE	FALSE	FALSE	#dfc27d
1	CACTA-1_Ccinerea	TRUE	FALSE	FALSE	#dfc27d
1	CACTA-1_PB	TRUE	FALSE	FALSE	#dfc27d
1	CACTA-2_AA	TRUE	FALSE	FALSE	#dfc27d
1	CACTA-O	FALSE	TRUE	FALSE	#dfc27d
1	CarERV2-int	TRUE	FALSE	FALSE	#dfc27d
1	Caulimovirus-1_PD	FALSE	TRUE	FALSE	#dfc27d
1	Caulimovirus-2_VVi	FALSE	TRUE	FALSE	#dfc27d
1	Caulimovirus-4_STu	FALSE	TRUE	FALSE	#dfc27d
1	CAULIV-1A_SBi	FALSE	TRUE	FALSE	#dfc27d
1	CEMUDR1	TRUE	FALSE	FALSE	#dfc27d
1	CER12-I_CE	TRUE	FALSE	FALSE	#dfc27d
1	CER15-1-I_CE	TRUE	FALSE	FALSE	#dfc27d
1	CER2-I_CE	TRUE	FALSE	FALSE	#dfc27d
1	CER4-I_CE	TRUE	FALSE	FALSE	#dfc27d
1	CER5-I_CE	FALSE	TRUE	FALSE	#dfc27d
1	CER8-I_CE	TRUE	FALSE	FALSE	#dfc27d
1	CER9-I_CE	TRUE	FALSE	FALSE	#dfc27d
1	CeRep54	TRUE	FALSE	FALSE	#dfc27d
1	CfERV1-int	TRUE	FALSE	FALSE	#dfc27d
1	Chapaev-11_HM	TRUE	FALSE	FALSE	#dfc27d
1	Chapaev-1_HM	TRUE	FALSE	FALSE	#dfc27d
1	Chapaev-20_HM	TRUE	FALSE	FALSE	#dfc27d
1	Chapaev-2_ACa	TRUE	FALSE	FALSE	#dfc27d
1	Chapaev-2_HM	TRUE	FALSE	FALSE	#dfc27d
1	Chapaev-2_NV	TRUE	FALSE	FALSE	#dfc27d
1	Chapaev3-1_AC	TRUE	FALSE	FALSE	#dfc27d
1	Chapaev3-1_HR	TRUE	FALSE	FALSE	#dfc27d
1	Chapaev3-2_AC	TRUE	FALSE	FALSE	#dfc27d
1	Chapaev3-2_PM	TRUE	FALSE	FALSE	#dfc27d
1	Chapaev3-3_PM	TRUE	FALSE	FALSE	#dfc27d
1	Chapaev3-5_HM	TRUE	FALSE	FALSE	#dfc27d
1	Chapaev3-N1_HR	TRUE	FALSE	FALSE	#dfc27d
1	Chapaev-3_NV	TRUE	FALSE	FALSE	#dfc27d
1	Chapaev-4_HM	TRUE	FALSE	FALSE	#dfc27d
1	Chapaev-7_HM	TRUE	FALSE	FALSE	#dfc27d
1	Chaplin3_FR	TRUE	FALSE	FALSE	#dfc27d
1	Chaplin5a_FR	FALSE	TRUE	FALSE	#dfc27d
1	Charlie-16_CPB	TRUE	FALSE	FALSE	#dfc27d
1	Charlie25	TRUE	FALSE	FALSE	#dfc27d
1	Charlie8	TRUE	FALSE	FALSE	#dfc27d
1	Charlie9	TRUE	FALSE	FALSE	#dfc27d
1	Cheshire_Mars	FALSE	TRUE	FALSE	#dfc27d
1	Chimpo_I-int	TRUE	FALSE	FALSE	#dfc27d
1	Chimpo_LTR	TRUE	FALSE	FALSE	#dfc27d
1	Chompy-198_AMi	TRUE	FALSE	FALSE	#dfc27d
1	Cics-1	TRUE	FALSE	FALSE	#dfc27d
1	Cigr-1-I	TRUE	FALSE	FALSE	#dfc27d
1	CiL2	TRUE	FALSE	FALSE	#dfc27d
1	Cili-2	TRUE	FALSE	FALSE	#dfc27d
1	CiLOA	TRUE	FALSE	FALSE	#dfc27d
1	Cimi1_CI	TRUE	FALSE	FALSE	#dfc27d
1	Clu-166_AG	FALSE	TRUE	FALSE	#dfc27d
1	COP12_I_MT-int	TRUE	FALSE	FALSE	#dfc27d
1	COP18_I_MT-int	TRUE	FALSE	FALSE	#dfc27d
1	COP2_I_MT-int	TRUE	FALSE	FALSE	#dfc27d
1	COP4_I_MT-int	TRUE	FALSE	FALSE	#dfc27d
1	Copia-100_AA-I	TRUE	FALSE	FALSE	#dfc27d
1	Copia-100_Mad-I	FALSE	TRUE	FALSE	#dfc27d
1	Copia-103_GM-I	TRUE	FALSE	FALSE	#dfc27d
1	Copia-105_BRa-LTR	FALSE	TRUE	FALSE	#dfc27d
1	Copia-107_SB-I	TRUE	FALSE	FALSE	#dfc27d
1	Copia-10_ES-I	FALSE	TRUE	FALSE	#dfc27d
1	Copia-10_SB-I	TRUE	FALSE	FALSE	#dfc27d
1	Copia-10_SMo-I	TRUE	FALSE	FALSE	#dfc27d
1	Copia-10_TC-I	TRUE	FALSE	FALSE	#dfc27d
1	Copia-110_BRa-I	FALSE	TRUE	FALSE	#dfc27d
1	Copia-112_AA-I	TRUE	FALSE	FALSE	#dfc27d
1	Copia-117_SB-I	TRUE	FALSE	FALSE	#dfc27d
1	Copia-118_BRa-I	FALSE	TRUE	FALSE	#dfc27d
1	Copia-118_SB-I	TRUE	FALSE	FALSE	#dfc27d
1	Copia-11_BRa-I	FALSE	TRUE	FALSE	#dfc27d
1	Copia11-VV_LTR	TRUE	FALSE	FALSE	#dfc27d
1	Copia-122_AA-I	TRUE	FALSE	FALSE	#dfc27d
1	Copia-122_BRa-I	TRUE	FALSE	FALSE	#dfc27d
1	Copia-128_SB-I	TRUE	FALSE	FALSE	#dfc27d
1	Copia-12_PGr-I	TRUE	FALSE	FALSE	#dfc27d
1	Copia-12_PIT-I	TRUE	FALSE	FALSE	#dfc27d
1	Copia-12_PTc-I	TRUE	FALSE	FALSE	#dfc27d
1	Copia12-PTR_I-int	TRUE	FALSE	FALSE	#dfc27d
1	Copia-12_SB-I	TRUE	FALSE	FALSE	#dfc27d
1	Copia12-VV_I-int	TRUE	FALSE	FALSE	#dfc27d
1	Copia-135_SB-I	TRUE	FALSE	FALSE	#dfc27d
1	Copia-136_SB-I	FALSE	TRUE	FALSE	#dfc27d
1	Copia-137_AA-I	TRUE	FALSE	FALSE	#dfc27d
1	Copia-13_BD-I	FALSE	TRUE	FALSE	#dfc27d
1	Copia-13_Mad-I	TRUE	FALSE	FALSE	#dfc27d
1	Copia13-PTR_I-int	TRUE	FALSE	FALSE	#dfc27d
1	Copia-141_SB-I	TRUE	FALSE	FALSE	#dfc27d
1	Copia-143_SB-I	TRUE	FALSE	FALSE	#dfc27d
1	Copia-14_FV-LTR	TRUE	FALSE	FALSE	#dfc27d
1	Copia-14_LH-I	TRUE	FALSE	FALSE	#dfc27d
1	Copia-14_MLP-I	TRUE	FALSE	FALSE	#dfc27d
1	Copia-15_AA-I	FALSE	TRUE	FALSE	#dfc27d
1	Copia-15_BRa-I	TRUE	FALSE	FALSE	#dfc27d
1	Copia-15_PX-LTR	FALSE	TRUE	FALSE	#dfc27d
1	Copia15-VV_I-int	FALSE	TRUE	FALSE	#dfc27d
1	Copia-16_CP-I	TRUE	FALSE	FALSE	#dfc27d
1	Copia-16_FV-I	TRUE	FALSE	FALSE	#dfc27d
1	Copia-16_PX-I	TRUE	FALSE	FALSE	#dfc27d
1	Copia-17_BRa-I	TRUE	FALSE	FALSE	#dfc27d
1	Copia-17_DPu-I	FALSE	TRUE	FALSE	#dfc27d
1	Copia-17_GM-I	FALSE	TRUE	FALSE	#dfc27d
1	Copia-18_BRa-I	TRUE	FALSE	FALSE	#dfc27d
1	Copia-18_CP-I	TRUE	FALSE	FALSE	#dfc27d
1	Copia-18_DPu-I	TRUE	FALSE	FALSE	#dfc27d
1	Copia-18_GM-I	TRUE	FALSE	FALSE	#dfc27d
1	Copia-18_PAb-LTR	TRUE	FALSE	FALSE	#dfc27d
1	Copia18-VV_I-int	TRUE	FALSE	FALSE	#dfc27d
1	Copia-19_MLP-I	TRUE	FALSE	FALSE	#dfc27d
1	Copia-1_AA-I	TRUE	FALSE	FALSE	#dfc27d
1	Copia-1_AAn-I	TRUE	FALSE	FALSE	#dfc27d
1	Copia-1_AL-I	TRUE	FALSE	FALSE	#dfc27d
1	Copia-1a_VMo-I	FALSE	TRUE	FALSE	#dfc27d
1	Copia-1_BG-I	TRUE	FALSE	FALSE	#dfc27d
1	Copia-1_CCO-I	FALSE	TRUE	FALSE	#dfc27d
1	Copia-1_DBi-I	TRUE	FALSE	FALSE	#dfc27d
1	Copia-1_DSim-I	TRUE	FALSE	FALSE	#dfc27d
1	Copia-1_DTa-I	FALSE	TRUE	FALSE	#dfc27d
1	Copia1-I_DM	TRUE	FALSE	FALSE	#dfc27d
1	Copia-1-I_DY	TRUE	FALSE	FALSE	#dfc27d
1	Copia-1-I_FCy	TRUE	FALSE	FALSE	#dfc27d
1	Copia-1_PGr-I	FALSE	TRUE	FALSE	#dfc27d
1	Copia-1_PPM-I	TRUE	FALSE	FALSE	#dfc27d
1	Copia-1_RP-LTR	TRUE	FALSE	FALSE	#dfc27d
1	Copia-1_SCH-I	FALSE	TRUE	FALSE	#dfc27d
1	Copia-1_SMo-I	FALSE	TRUE	FALSE	#dfc27d
1	Copia-1_SPDB-I	TRUE	FALSE	FALSE	#dfc27d
1	Copia-1_TA-I	TRUE	FALSE	FALSE	#dfc27d
1	Copia-1_Trm-I	TRUE	FALSE	FALSE	#dfc27d
1	Copia-20_BD-I	FALSE	TRUE	FALSE	#dfc27d
1	Copia-20_EPa-I	TRUE	FALSE	FALSE	#dfc27d
1	Copia-20_Mad-I	TRUE	FALSE	FALSE	#dfc27d
1	Copia20-NVi_I-int	TRUE	FALSE	FALSE	#dfc27d
1	Copia-20_PAb-I	FALSE	TRUE	FALSE	#dfc27d
1	Copia-20_PIT-I	TRUE	FALSE	FALSE	#dfc27d
1	Copia20-ZM_I-int	TRUE	FALSE	FALSE	#dfc27d
1	Copia-21_BRa-I	FALSE	TRUE	FALSE	#dfc27d
1	Copia-21_CQ-I	TRUE	FALSE	FALSE	#dfc27d
1	Copia-21_PX-I	FALSE	TRUE	FALSE	#dfc27d
1	Copia-22_PAb-I	FALSE	TRUE	FALSE	#dfc27d
1	Copia-23_BG-I	TRUE	FALSE	FALSE	#dfc27d
1	Copia-23_FV-I	TRUE	FALSE	FALSE	#dfc27d
1	Copia-24_GM-I	TRUE	FALSE	FALSE	#dfc27d
1	Copia-24_GM-LTR	TRUE	FALSE	FALSE	#dfc27d
1	Copia-24_MLP-I	TRUE	FALSE	FALSE	#dfc27d
1	Copia-25_DPu-I	TRUE	FALSE	FALSE	#dfc27d
1	Copia-25_FV-I	TRUE	FALSE	FALSE	#dfc27d
1	Copia-25_Pru-I	TRUE	FALSE	FALSE	#dfc27d
1	Copia-26_AA-I	FALSE	TRUE	FALSE	#dfc27d
1	Copia-26_BG-I	TRUE	FALSE	FALSE	#dfc27d
1	Copia-26_MLP-I	TRUE	FALSE	FALSE	#dfc27d
1	Copia-26_Pru-I	TRUE	FALSE	FALSE	#dfc27d
1	Copia-26_PX-I	TRUE	FALSE	FALSE	#dfc27d
1	Copia-26_ST-I	TRUE	FALSE	FALSE	#dfc27d
1	Copia27-VV_I-int	TRUE	FALSE	FALSE	#dfc27d
1	Copia-28_BG-I	TRUE	FALSE	FALSE	#dfc27d
1	Copia29-PTR_I-int	TRUE	FALSE	FALSE	#dfc27d
1	Copia29-ZM_I-int	TRUE	FALSE	FALSE	#dfc27d
1	Copia-2_BG-LTR	TRUE	FALSE	FALSE	#dfc27d
1	Copia-2_DYa-LTR	TRUE	FALSE	FALSE	#dfc27d
1	Copia2-I_CR	TRUE	FALSE	FALSE	#dfc27d
1	Copia-2-I_FCy	TRUE	FALSE	FALSE	#dfc27d
1	Copia2_I-int	TRUE	FALSE	FALSE	#dfc27d
1	Copia2_LTR_DM	TRUE	FALSE	FALSE	#dfc27d
1	Copia-2_Pru-I	TRUE	FALSE	FALSE	#dfc27d
1	Copia2-PTR_I-int	TRUE	FALSE	FALSE	#dfc27d
1	Copia2-VV_I-int	TRUE	FALSE	FALSE	#dfc27d
1	Copia-30_CQ-I	TRUE	FALSE	FALSE	#dfc27d
1	Copia-30_GM-I	TRUE	FALSE	FALSE	#dfc27d
1	Copia-30_PAb-I	FALSE	TRUE	FALSE	#dfc27d
1	Copia30-ZM_LTR	FALSE	TRUE	FALSE	#dfc27d
1	Copia-31_CQ-I	TRUE	FALSE	FALSE	#dfc27d
1	Copia-31_DPu-I	TRUE	FALSE	FALSE	#dfc27d
1	Copia-31_PX-I	TRUE	FALSE	FALSE	#dfc27d
1	Copia-32_GM-I	TRUE	FALSE	FALSE	#dfc27d
1	Copia-32-I_VV	TRUE	FALSE	FALSE	#dfc27d
1	Copia-32_MLP-I	TRUE	FALSE	FALSE	#dfc27d
1	Copia32-PTR_I-int	TRUE	FALSE	FALSE	#dfc27d
1	Copia32-PTR_LTR	TRUE	FALSE	FALSE	#dfc27d
1	Copia32-ZM_I-int	TRUE	FALSE	FALSE	#dfc27d
1	Copia-33_BD-I	TRUE	FALSE	FALSE	#dfc27d
1	Copia-33_BG-I	TRUE	FALSE	FALSE	#dfc27d
1	Copia-33_Mad-I	TRUE	FALSE	FALSE	#dfc27d
1	Copia-33_PX-I	TRUE	FALSE	FALSE	#dfc27d
1	Copia-35_CQ-LTR	TRUE	FALSE	FALSE	#dfc27d
1	Copia35-PTR_I-int	TRUE	FALSE	FALSE	#dfc27d
1	Copia-36_FV-I	TRUE	FALSE	FALSE	#dfc27d
1	Copia-36_MLP-I	TRUE	FALSE	FALSE	#dfc27d
1	Copia-37_DPu-I	TRUE	FALSE	FALSE	#dfc27d
1	Copia-37_FV-I	TRUE	FALSE	FALSE	#dfc27d
1	Copia-37-I_ZM	TRUE	FALSE	FALSE	#dfc27d
1	Copia-37_SB-LTR	TRUE	FALSE	FALSE	#dfc27d
1	Copia-37_VV-LTR	TRUE	FALSE	FALSE	#dfc27d
1	Copia-38_FV-I	TRUE	FALSE	FALSE	#dfc27d
1	Copia-38_PIT-I	TRUE	FALSE	FALSE	#dfc27d
1	Copia-38_Pru-I	TRUE	FALSE	FALSE	#dfc27d
1	Copia-39_DPu-I	TRUE	FALSE	FALSE	#dfc27d
1	Copia-39_FV-LTR	TRUE	FALSE	FALSE	#dfc27d
1	Copia-3_DAn-I	TRUE	FALSE	FALSE	#dfc27d
1	Copia-3_DGri-I	TRUE	FALSE	FALSE	#dfc27d
1	Copia3_HV-int	TRUE	FALSE	FALSE	#dfc27d
1	Copia-3-I_NV	TRUE	FALSE	FALSE	#dfc27d
1	Copia-3-LTR_NV	TRUE	FALSE	FALSE	#dfc27d
1	Copia-3_Pru-I	TRUE	FALSE	FALSE	#dfc27d
1	Copia-3_PTc-LTR	TRUE	FALSE	FALSE	#dfc27d
1	Copia-3_SCH-I	FALSE	TRUE	FALSE	#dfc27d
1	Copia-3_TA-I	TRUE	FALSE	FALSE	#dfc27d
1	Copia-40_BG-I	TRUE	FALSE	FALSE	#dfc27d
1	Copia-40_PIT-I	TRUE	FALSE	FALSE	#dfc27d
1	Copia-40_SB-I	TRUE	FALSE	FALSE	#dfc27d
1	Copia-41_BRa-I	TRUE	FALSE	FALSE	#dfc27d
1	Copia-42_ST-LTR	TRUE	FALSE	FALSE	#dfc27d
1	Copia-43_FV-I	TRUE	FALSE	FALSE	#dfc27d
1	Copia-43_GM-I	TRUE	FALSE	FALSE	#dfc27d
1	Copia-46_PX-I	TRUE	FALSE	FALSE	#dfc27d
1	Copia-47_Mad-I	TRUE	FALSE	FALSE	#dfc27d
1	Copia-47_PX-I	TRUE	FALSE	FALSE	#dfc27d
1	Copia-47_VV-I	TRUE	FALSE	FALSE	#dfc27d
1	Copia-48_BRa-I	TRUE	FALSE	FALSE	#dfc27d
1	Copia-48_GM-I	TRUE	FALSE	FALSE	#dfc27d
1	Copia-4_CP-I	TRUE	FALSE	FALSE	#dfc27d
1	Copia-4_DMoj-I	TRUE	FALSE	FALSE	#dfc27d
1	Copia4-I_AG	TRUE	FALSE	FALSE	#dfc27d
1	Copia4_LTR_MT	TRUE	FALSE	FALSE	#dfc27d
1	Copia-4_SL-LTR	TRUE	FALSE	FALSE	#dfc27d
1	Copia-4_ST-LTR	TRUE	FALSE	FALSE	#dfc27d
1	Copia-50_ST-I	TRUE	FALSE	FALSE	#dfc27d
1	Copia-50_VV-I	TRUE	FALSE	FALSE	#dfc27d
1	Copia51-PTR_I-int	TRUE	FALSE	FALSE	#dfc27d
1	Copia-51_ST-I	TRUE	FALSE	FALSE	#dfc27d
1	Copia-52_MLP-I	TRUE	FALSE	FALSE	#dfc27d
1	Copia-52_ZM-I	TRUE	FALSE	FALSE	#dfc27d
1	Copia-53_BG-I	TRUE	FALSE	FALSE	#dfc27d
1	Copia-55_GM-I	TRUE	FALSE	FALSE	#dfc27d
1	Copia-56_BRa-I	TRUE	FALSE	FALSE	#dfc27d
1	Copia-56_MLP-I	TRUE	FALSE	FALSE	#dfc27d
1	Copia-56_SB-I	TRUE	FALSE	FALSE	#dfc27d
1	Copia-57_GM-I	TRUE	FALSE	FALSE	#dfc27d
1	Copia-57_VV-I	TRUE	FALSE	FALSE	#dfc27d
1	Copia-58_Mad-LTR	TRUE	FALSE	FALSE	#dfc27d
1	Copia-58_PX-I	TRUE	FALSE	FALSE	#dfc27d
1	Copia-59_Mad-I	TRUE	FALSE	FALSE	#dfc27d
1	Copia-5_DPu-I	TRUE	FALSE	FALSE	#dfc27d
1	Copia-5_GM-I	TRUE	FALSE	FALSE	#dfc27d
1	Copia5-I_DR	TRUE	FALSE	FALSE	#dfc27d
1	Copia-5_TA-I	TRUE	FALSE	FALSE	#dfc27d
1	Copia5-VV_I-int	TRUE	FALSE	FALSE	#dfc27d
1	Copia-60_BG-I	TRUE	FALSE	FALSE	#dfc27d
1	Copia-60_ST-I	TRUE	FALSE	FALSE	#dfc27d
1	Copia-61_PX-I	TRUE	FALSE	FALSE	#dfc27d
1	Copia-61_ZM-I	TRUE	FALSE	FALSE	#dfc27d
1	Copia-62_Mad-I	TRUE	FALSE	FALSE	#dfc27d
1	Copia-62_MLP-I	TRUE	FALSE	FALSE	#dfc27d
1	Copia-62_PT-I	TRUE	FALSE	FALSE	#dfc27d
1	Copia-62_PX-I	TRUE	FALSE	FALSE	#dfc27d
1	Copia-63_SB-I	TRUE	FALSE	FALSE	#dfc27d
1	Copia-64_ZM-I	TRUE	FALSE	FALSE	#dfc27d
1	Copia-67_GM-I	TRUE	FALSE	FALSE	#dfc27d
1	Copia-67_Mad-I	TRUE	FALSE	FALSE	#dfc27d
1	Copia-69_PT-I	TRUE	FALSE	FALSE	#dfc27d
1	Copia-6_CPu-I	TRUE	FALSE	FALSE	#dfc27d
1	Copia-6_PSt-I	TRUE	FALSE	FALSE	#dfc27d
1	Copia6-PTR_I-int	TRUE	FALSE	FALSE	#dfc27d
1	Copia-6_TA-I	TRUE	FALSE	FALSE	#dfc27d
1	Copia-6_TC-I	TRUE	FALSE	FALSE	#dfc27d
1	Copia-71_GM-I	TRUE	FALSE	FALSE	#dfc27d
1	Copia-71_PT-I	TRUE	FALSE	FALSE	#dfc27d
1	Copia-72_Mad-I	TRUE	FALSE	FALSE	#dfc27d
1	Copia-73_BRa-I	TRUE	FALSE	FALSE	#dfc27d
1	Copia-75_Mad-I	TRUE	FALSE	FALSE	#dfc27d
1	Copia-78_Mad-LTR	TRUE	FALSE	FALSE	#dfc27d
1	Copia-78_ST-I	TRUE	FALSE	FALSE	#dfc27d
1	Copia-79_PT-I	TRUE	FALSE	FALSE	#dfc27d
1	Copia-7_DAn-I	TRUE	FALSE	FALSE	#dfc27d
1	Copia-7_DPu-I	TRUE	FALSE	FALSE	#dfc27d
1	Copia-7_PIT-I	TRUE	FALSE	FALSE	#dfc27d
1	Copia-7_SB-I	TRUE	FALSE	FALSE	#dfc27d
1	Copia-80_ST-I	TRUE	FALSE	FALSE	#dfc27d
1	Copia-82_Mad-I	TRUE	FALSE	FALSE	#dfc27d
1	Copia-83_GM-I	TRUE	FALSE	FALSE	#dfc27d
1	Copia-86_GM-I	TRUE	FALSE	FALSE	#dfc27d
1	Copia-86_ST-I	TRUE	FALSE	FALSE	#dfc27d
1	Copia-87_ST-I	TRUE	FALSE	FALSE	#dfc27d
1	Copia-89_VV-I	TRUE	FALSE	FALSE	#dfc27d
1	Copia-8_CPu-I	TRUE	FALSE	FALSE	#dfc27d
1	Copia-8_LBS-I	TRUE	FALSE	FALSE	#dfc27d
1	Copia8-ZM_I-int	TRUE	FALSE	FALSE	#dfc27d
1	Copia-91_BRa-I	TRUE	FALSE	FALSE	#dfc27d
1	Copia-92_PTr-I	TRUE	FALSE	FALSE	#dfc27d
1	Copia-96_Mad-I	TRUE	FALSE	FALSE	#dfc27d
1	Copia-98_AA-I	TRUE	FALSE	FALSE	#dfc27d
1	Copia-99_GM-LTR	TRUE	FALSE	FALSE	#dfc27d
1	Copia-9_ADe-I	TRUE	FALSE	FALSE	#dfc27d
1	Copia-9_CP-I	TRUE	FALSE	FALSE	#dfc27d
1	Copia-9_CQ-I	TRUE	FALSE	FALSE	#dfc27d
1	Copia-9_DWil-I	TRUE	FALSE	FALSE	#dfc27d
1	Copia9-I_TP	TRUE	FALSE	FALSE	#dfc27d
1	Copia-9_PX-I	TRUE	FALSE	FALSE	#dfc27d
1	Copia-9_SMo-I	TRUE	FALSE	FALSE	#dfc27d
1	Copia-9_TA-I	TRUE	FALSE	FALSE	#dfc27d
1	Copia-9_TMe-I	TRUE	FALSE	FALSE	#dfc27d
1	Copia_I-int	TRUE	FALSE	FALSE	#dfc27d
1	Copia_LTR	TRUE	FALSE	FALSE	#dfc27d
1	COPMET_I-int	TRUE	FALSE	FALSE	#dfc27d
1	Coprina_Pc1	TRUE	FALSE	FALSE	#dfc27d
1	CPSC2_I-int	TRUE	FALSE	FALSE	#dfc27d
1	CR1-100_AAe	TRUE	FALSE	FALSE	#dfc27d
1	CR1-109_AAe	TRUE	FALSE	FALSE	#dfc27d
1	CR1-10_AMi	TRUE	FALSE	FALSE	#dfc27d
1	CR1-10_BF	TRUE	FALSE	FALSE	#dfc27d
1	CR1-10_CGi	TRUE	FALSE	FALSE	#dfc27d
1	CR1-10_CPB	TRUE	FALSE	FALSE	#dfc27d
1	CR1-10_DR	TRUE	FALSE	FALSE	#dfc27d
1	CR1-10_HM	TRUE	FALSE	FALSE	#dfc27d
1	CR1-10_SP	TRUE	FALSE	FALSE	#dfc27d
1	CR1-116_AAe	TRUE	FALSE	FALSE	#dfc27d
1	CR1-11_BF	TRUE	FALSE	FALSE	#dfc27d
1	CR1-11_CGi	TRUE	FALSE	FALSE	#dfc27d
1	CR1-11_HM	TRUE	FALSE	FALSE	#dfc27d
1	CR1-120_AAe	TRUE	FALSE	FALSE	#dfc27d
1	CR1-125_AAe	TRUE	FALSE	FALSE	#dfc27d
1	CR1-127_AAe	TRUE	FALSE	FALSE	#dfc27d
1	CR1-12B_CPB	TRUE	FALSE	FALSE	#dfc27d
1	CR1-12_CPB	TRUE	FALSE	FALSE	#dfc27d
1	CR1-12_CQ	TRUE	FALSE	FALSE	#dfc27d
1	CR1-13_BF	TRUE	FALSE	FALSE	#dfc27d
1	CR1-13_CGi	TRUE	FALSE	FALSE	#dfc27d
1	CR1-13_SP	TRUE	FALSE	FALSE	#dfc27d
1	CR1-14_AMi	TRUE	FALSE	FALSE	#dfc27d
1	CR1-14_CGi	TRUE	FALSE	FALSE	#dfc27d
1	CR1-15_AMi	TRUE	FALSE	FALSE	#dfc27d
1	CR1-15_Crp	TRUE	FALSE	FALSE	#dfc27d
1	CR1-15_HM	TRUE	FALSE	FALSE	#dfc27d
1	CR1-15_NV	TRUE	FALSE	FALSE	#dfc27d
1	CR1-17_AMi	TRUE	FALSE	FALSE	#dfc27d
1	CR1-17_BF	TRUE	FALSE	FALSE	#dfc27d
1	CR1-17_HM	TRUE	FALSE	FALSE	#dfc27d
1	CR1-18_DR	TRUE	FALSE	FALSE	#dfc27d
1	CR1-19_BF	TRUE	FALSE	FALSE	#dfc27d
1	CR1-19_HM	TRUE	FALSE	FALSE	#dfc27d
1	CR1-19_NV	TRUE	FALSE	FALSE	#dfc27d
1	CR1-1a_AG	TRUE	FALSE	FALSE	#dfc27d
1	CR1-1B_CPB	TRUE	FALSE	FALSE	#dfc27d
1	CR1-1b_Lch	TRUE	FALSE	FALSE	#dfc27d
1	CR1_1b_Xt	TRUE	FALSE	FALSE	#dfc27d
1	CR1-1_CGi	TRUE	FALSE	FALSE	#dfc27d
1	CR1-1_CM	TRUE	FALSE	FALSE	#dfc27d
1	CR1-1_CPB	TRUE	FALSE	FALSE	#dfc27d
1	CR1-1_Croc	TRUE	FALSE	FALSE	#dfc27d
1	CR1-1_DBi	TRUE	FALSE	FALSE	#dfc27d
1	CR1-1_DF	TRUE	FALSE	FALSE	#dfc27d
1	CR1-1_Gav	TRUE	FALSE	FALSE	#dfc27d
1	CR1-1_LCh	TRUE	FALSE	FALSE	#dfc27d
1	CR1-1_NVi	TRUE	FALSE	FALSE	#dfc27d
1	CR1-1_TCa	TRUE	FALSE	FALSE	#dfc27d
1	CR1-20_AMi	TRUE	FALSE	FALSE	#dfc27d
1	CR1-20_BF	TRUE	FALSE	FALSE	#dfc27d
1	CR1-20_NV	TRUE	FALSE	FALSE	#dfc27d
1	CR1-20_SP	TRUE	FALSE	FALSE	#dfc27d
1	CR1-21_BF	TRUE	FALSE	FALSE	#dfc27d
1	CR1-22_BF	TRUE	FALSE	FALSE	#dfc27d
1	CR1-22_CQ	TRUE	FALSE	FALSE	#dfc27d
1	CR1-22_SP	TRUE	FALSE	FALSE	#dfc27d
1	CR1-24_DR	TRUE	FALSE	FALSE	#dfc27d
1	CR1-24_SP	TRUE	FALSE	FALSE	#dfc27d
1	CR1-25_BF	TRUE	FALSE	FALSE	#dfc27d
1	CR1-25_DR	TRUE	FALSE	FALSE	#dfc27d
1	CR1-25_SP	TRUE	FALSE	FALSE	#dfc27d
1	CR1-27_BF	TRUE	FALSE	FALSE	#dfc27d
1	CR1-28_BF	TRUE	FALSE	FALSE	#dfc27d
1	CR1-28_HM	TRUE	FALSE	FALSE	#dfc27d
1	CR1-2_AG	TRUE	FALSE	FALSE	#dfc27d
1	CR1-2_AMi	TRUE	FALSE	FALSE	#dfc27d
1	CR1-2b_Lch	TRUE	FALSE	FALSE	#dfc27d
1	CR1-2C_Croc	TRUE	FALSE	FALSE	#dfc27d
1	CR1-2_DEu	TRUE	FALSE	FALSE	#dfc27d
1	CR1-2_DWi	TRUE	FALSE	FALSE	#dfc27d
1	CR1-2_LCh	TRUE	FALSE	FALSE	#dfc27d
1	CR1-2_SP	TRUE	FALSE	FALSE	#dfc27d
1	CR1-2_XT	TRUE	FALSE	FALSE	#dfc27d
1	CR1-30_HM	TRUE	FALSE	FALSE	#dfc27d
1	CR1-31_HM	TRUE	FALSE	FALSE	#dfc27d
1	CR1-33_BF	FALSE	TRUE	FALSE	#dfc27d
1	CR1-33_HM	TRUE	FALSE	FALSE	#dfc27d
1	CR1-34_BF	TRUE	FALSE	FALSE	#dfc27d
1	CR1-34_HM	TRUE	FALSE	FALSE	#dfc27d
1	CR1-35_BF	TRUE	FALSE	FALSE	#dfc27d
1	CR1-36_BF	TRUE	FALSE	FALSE	#dfc27d
1	CR1-36_HM	TRUE	FALSE	FALSE	#dfc27d
1	CR1-37_HM	TRUE	FALSE	FALSE	#dfc27d
1	CR1-38_BF	TRUE	FALSE	FALSE	#dfc27d
1	CR1-39_HM	TRUE	FALSE	FALSE	#dfc27d
1	CR1-3b_LCh	TRUE	FALSE	FALSE	#dfc27d
1	CR1-3_CGi	TRUE	FALSE	FALSE	#dfc27d
1	CR1-3c_LCh	TRUE	FALSE	FALSE	#dfc27d
1	CR1-3_CQ	TRUE	FALSE	FALSE	#dfc27d
1	CR1-3_Croc	TRUE	FALSE	FALSE	#dfc27d
1	CR1-3_DWi	TRUE	FALSE	FALSE	#dfc27d
1	CR1-3_Gav	TRUE	FALSE	FALSE	#dfc27d
1	CR1-3_Lch	TRUE	FALSE	FALSE	#dfc27d
1	CR1-3_NV	TRUE	FALSE	FALSE	#dfc27d
1	CR1-40_BF	TRUE	FALSE	FALSE	#dfc27d
1	CR1-42_BF	TRUE	FALSE	FALSE	#dfc27d
1	CR1-44_DR	TRUE	FALSE	FALSE	#dfc27d
1	CR1-44_HM	TRUE	FALSE	FALSE	#dfc27d
1	CR1-45_BF	TRUE	FALSE	FALSE	#dfc27d
1	CR1-45_HM	TRUE	FALSE	FALSE	#dfc27d
1	CR1-48_BF	TRUE	FALSE	FALSE	#dfc27d
1	CR1-49_HM	TRUE	FALSE	FALSE	#dfc27d
1	CR1-4_BF	TRUE	FALSE	FALSE	#dfc27d
1	CR1-4_CGi	TRUE	FALSE	FALSE	#dfc27d
1	CR1-4_CQ	TRUE	FALSE	FALSE	#dfc27d
1	CR1-4_DAn	TRUE	FALSE	FALSE	#dfc27d
1	CR1-4_DEl	TRUE	FALSE	FALSE	#dfc27d
1	CR1-4_HM	TRUE	FALSE	FALSE	#dfc27d
1	CR1-4_LCh	TRUE	FALSE	FALSE	#dfc27d
1	CR1-4_NV	TRUE	FALSE	FALSE	#dfc27d
1	CR1-4_SP	TRUE	FALSE	FALSE	#dfc27d
1	CR1-50_BF	TRUE	FALSE	FALSE	#dfc27d
1	CR1-50_HM	TRUE	FALSE	FALSE	#dfc27d
1	CR1-52_AAe	TRUE	FALSE	FALSE	#dfc27d
1	CR1-52_BF	TRUE	FALSE	FALSE	#dfc27d
1	CR1-53_BF	TRUE	FALSE	FALSE	#dfc27d
1	CR1-53_HM	TRUE	FALSE	FALSE	#dfc27d
1	CR1-54_BF	TRUE	FALSE	FALSE	#dfc27d
1	CR1-54_HM	TRUE	FALSE	FALSE	#dfc27d
1	CR1-55_HM	TRUE	FALSE	FALSE	#dfc27d
1	CR1-5B_AMi	TRUE	FALSE	FALSE	#dfc27d
1	CR1-5_BF	TRUE	FALSE	FALSE	#dfc27d
1	CR1-5_CGi	TRUE	FALSE	FALSE	#dfc27d
1	CR1-5_DK	TRUE	FALSE	FALSE	#dfc27d
1	CR1-5_HM	TRUE	FALSE	FALSE	#dfc27d
1	CR1-62_HM	TRUE	FALSE	FALSE	#dfc27d
1	CR1-63_HM	TRUE	FALSE	FALSE	#dfc27d
1	CR1-64B_AAe	TRUE	FALSE	FALSE	#dfc27d
1	CR1-64_HM	TRUE	FALSE	FALSE	#dfc27d
1	CR1-66_AAe	TRUE	FALSE	FALSE	#dfc27d
1	CR1-66_HM	TRUE	FALSE	FALSE	#dfc27d
1	CR1-6_HM	TRUE	FALSE	FALSE	#dfc27d
1	CR1-71_HM	TRUE	FALSE	FALSE	#dfc27d
1	CR1-72_HM	TRUE	FALSE	FALSE	#dfc27d
1	CR1-74_HM	TRUE	FALSE	FALSE	#dfc27d
1	CR1-75_AAe	TRUE	FALSE	FALSE	#dfc27d
1	CR1-75_HM	TRUE	FALSE	FALSE	#dfc27d
1	CR1-76_HM	TRUE	FALSE	FALSE	#dfc27d
1	CR1-7_BF	TRUE	FALSE	FALSE	#dfc27d
1	CR1-7_CPB	TRUE	FALSE	FALSE	#dfc27d
1	CR1-7_DT	TRUE	FALSE	FALSE	#dfc27d
1	CR1-7_HM	TRUE	FALSE	FALSE	#dfc27d
1	CR1-7_NV	TRUE	FALSE	FALSE	#dfc27d
1	CR1-81_HM	TRUE	FALSE	FALSE	#dfc27d
1	CR1-82_HM	TRUE	FALSE	FALSE	#dfc27d
1	CR1-84_HM	TRUE	FALSE	FALSE	#dfc27d
1	CR1-86_HM	TRUE	FALSE	FALSE	#dfc27d
1	CR1-89_HM	TRUE	FALSE	FALSE	#dfc27d
1	CR1-8_CGi	TRUE	FALSE	FALSE	#dfc27d
1	CR1-8_NV	TRUE	FALSE	FALSE	#dfc27d
1	CR1-92_AAe	TRUE	FALSE	FALSE	#dfc27d
1	CR1-95_AAe	TRUE	FALSE	FALSE	#dfc27d
1	CR1-96_AAe	TRUE	FALSE	FALSE	#dfc27d
1	CR1-98_AAe	TRUE	FALSE	FALSE	#dfc27d
1	CR1-9B_AMi	TRUE	FALSE	FALSE	#dfc27d
1	CR1-9_BF	TRUE	FALSE	FALSE	#dfc27d
1	CR1-9_CPB	TRUE	FALSE	FALSE	#dfc27d
1	CR1-9D_AMi	TRUE	FALSE	FALSE	#dfc27d
1	CR1-9_NV	TRUE	FALSE	FALSE	#dfc27d
1	CR1_AC_1	TRUE	FALSE	FALSE	#dfc27d
1	CR1-B	TRUE	FALSE	FALSE	#dfc27d
1	CR1-B2	TRUE	FALSE	FALSE	#dfc27d
1	CR1-C2	TRUE	FALSE	FALSE	#dfc27d
1	CR1-C3	TRUE	FALSE	FALSE	#dfc27d
1	CR1-D	TRUE	FALSE	FALSE	#dfc27d
1	CR1_Ele11	TRUE	FALSE	FALSE	#dfc27d
1	CR1_Ele15	TRUE	FALSE	FALSE	#dfc27d
1	CR1_Ele17	TRUE	FALSE	FALSE	#dfc27d
1	CR1_Ele20	TRUE	FALSE	FALSE	#dfc27d
1	CR1_Ele25	TRUE	FALSE	FALSE	#dfc27d
1	CR1_Ele28	TRUE	FALSE	FALSE	#dfc27d
1	CR1_Ele3	TRUE	FALSE	FALSE	#dfc27d
1	CR1_Ele36	TRUE	FALSE	FALSE	#dfc27d
1	CR1_Ele37	TRUE	FALSE	FALSE	#dfc27d
1	CR1-H2	TRUE	FALSE	FALSE	#dfc27d
1	CR1-J1_Pass	TRUE	FALSE	FALSE	#dfc27d
1	CR1-K4_Tgu	TRUE	FALSE	FALSE	#dfc27d
1	CR1-L2_Tgu	TRUE	FALSE	FALSE	#dfc27d
1	CR1_Mam	TRUE	FALSE	FALSE	#dfc27d
1	CR1-X	TRUE	FALSE	FALSE	#dfc27d
1	CR1-X2_Pass	TRUE	FALSE	FALSE	#dfc27d
1	CR1-X3_Pass	TRUE	FALSE	FALSE	#dfc27d
1	CR1-Y	TRUE	FALSE	FALSE	#dfc27d
1	CR1-Y3	TRUE	FALSE	FALSE	#dfc27d
1	CR1-Y_Pass	TRUE	FALSE	FALSE	#dfc27d
1	CR1-Z1_Pass	TRUE	FALSE	FALSE	#dfc27d
1	Crack-10_BF	TRUE	FALSE	FALSE	#dfc27d
1	Crack-11_BF	TRUE	FALSE	FALSE	#dfc27d
1	Crack-14_AAe	TRUE	FALSE	FALSE	#dfc27d
1	Crack-15_AAe	TRUE	FALSE	FALSE	#dfc27d
1	Crack-16_AAe	TRUE	FALSE	FALSE	#dfc27d
1	Crack-1_CP	TRUE	FALSE	FALSE	#dfc27d
1	Crack-1_IS	TRUE	FALSE	FALSE	#dfc27d
1	Crack-1_NV	TRUE	FALSE	FALSE	#dfc27d
1	Crack-1_SP	TRUE	FALSE	FALSE	#dfc27d
1	Crack-21_AAe	TRUE	FALSE	FALSE	#dfc27d
1	Crack-22_AAe	TRUE	FALSE	FALSE	#dfc27d
1	Crack-22_BF	TRUE	FALSE	FALSE	#dfc27d
1	Crack-23_AAe	TRUE	FALSE	FALSE	#dfc27d
1	Crack-24_AAe	TRUE	FALSE	FALSE	#dfc27d
1	Crack-27_AAe	TRUE	FALSE	FALSE	#dfc27d
1	Crack-2_HM	TRUE	FALSE	FALSE	#dfc27d
1	Crack-2_NV	TRUE	FALSE	FALSE	#dfc27d
1	Crack-2_SP	TRUE	FALSE	FALSE	#dfc27d
1	Crack-33_AAe	TRUE	FALSE	FALSE	#dfc27d
1	Crack-35_AAe	TRUE	FALSE	FALSE	#dfc27d
1	Crack-37_AAe	TRUE	FALSE	FALSE	#dfc27d
1	Crack-3_AAe	TRUE	FALSE	FALSE	#dfc27d
1	Crack-3_HM	TRUE	FALSE	FALSE	#dfc27d
1	Crack-4_HM	TRUE	FALSE	FALSE	#dfc27d
1	Crack-5_HM	TRUE	FALSE	FALSE	#dfc27d
1	Crack-6_BF	TRUE	FALSE	FALSE	#dfc27d
1	Crack-7_BF	TRUE	FALSE	FALSE	#dfc27d
1	Crack-7_HM	TRUE	FALSE	FALSE	#dfc27d
1	Crack-8_BF	TRUE	FALSE	FALSE	#dfc27d
1	Crack-8_CQ	TRUE	FALSE	FALSE	#dfc27d
1	Crack-9_BF	TRUE	FALSE	FALSE	#dfc27d
1	Cre-1_BM	TRUE	FALSE	FALSE	#dfc27d
1	Cre-1_MB	FALSE	TRUE	FALSE	#dfc27d
1	Cre-2_BM	TRUE	FALSE	FALSE	#dfc27d
1	CRM_INT-int	TRUE	FALSE	FALSE	#dfc27d
1	Crypton-13_CGi	TRUE	FALSE	FALSE	#dfc27d
1	Crypton-14_CGi	TRUE	FALSE	FALSE	#dfc27d
1	Crypton-1_TC	TRUE	FALSE	FALSE	#dfc27d
1	Crypton-2_NV	TRUE	FALSE	FALSE	#dfc27d
1	Crypton-7_CGi	TRUE	FALSE	FALSE	#dfc27d
1	CryptonA-1_SK	TRUE	FALSE	FALSE	#dfc27d
1	CryptonA-2_SK	TRUE	FALSE	FALSE	#dfc27d
1	CryptonA-3_SK	TRUE	FALSE	FALSE	#dfc27d
1	CryptonF-1_NF	FALSE	TRUE	FALSE	#dfc27d
1	CryptonH-1_DR	TRUE	FALSE	FALSE	#dfc27d
1	Crypton-N3_CGi	TRUE	FALSE	FALSE	#dfc27d
1	CryptonV-1_CGi	TRUE	FALSE	FALSE	#dfc27d
1	CryptonV-4_HSal	TRUE	FALSE	FALSE	#dfc27d
1	CUMULE	TRUE	FALSE	FALSE	#dfc27d
1	CVE	TRUE	FALSE	FALSE	#dfc27d
1	Dada-1_CSa	TRUE	FALSE	FALSE	#dfc27d
1	Dada-1_ON	TRUE	FALSE	FALSE	#dfc27d
1	Dada-tG_PMar	TRUE	FALSE	FALSE	#dfc27d
1	Dada-U1A_DR	TRUE	FALSE	FALSE	#dfc27d
1	Dada-U1B_DR	TRUE	FALSE	FALSE	#dfc27d
1	Dada-U6_CGi	TRUE	FALSE	FALSE	#dfc27d
1	Dada-U6N1_DR	TRUE	FALSE	FALSE	#dfc27d
1	Daphne-11_SPu	TRUE	FALSE	FALSE	#dfc27d
1	Daphne-12_SPu	TRUE	FALSE	FALSE	#dfc27d
1	Daphne-14_HMa	TRUE	FALSE	FALSE	#dfc27d
1	Daphne-14_NV	TRUE	FALSE	FALSE	#dfc27d
1	Daphne-15_SP	TRUE	FALSE	FALSE	#dfc27d
1	Daphne-18_SP	TRUE	FALSE	FALSE	#dfc27d
1	Daphne-19_SP	TRUE	FALSE	FALSE	#dfc27d
1	Daphne-1_NV	TRUE	FALSE	FALSE	#dfc27d
1	Daphne-21_SPu	TRUE	FALSE	FALSE	#dfc27d
1	Daphne-29_HMa	TRUE	FALSE	FALSE	#dfc27d
1	Daphne-38_HMa	TRUE	FALSE	FALSE	#dfc27d
1	Daphne-40_HMa	TRUE	FALSE	FALSE	#dfc27d
1	Daphne-41_HMa	TRUE	FALSE	FALSE	#dfc27d
1	Daphne-4_BF	TRUE	FALSE	FALSE	#dfc27d
1	Daphne-4_NV	TRUE	FALSE	FALSE	#dfc27d
1	Daphne-51_HMa	TRUE	FALSE	FALSE	#dfc27d
1	Daphne-52_HMa	TRUE	FALSE	FALSE	#dfc27d
1	Daphne-57_HMa	TRUE	FALSE	FALSE	#dfc27d
1	Daphne-65_HMa	TRUE	FALSE	FALSE	#dfc27d
1	Daphne-78_HMa	TRUE	FALSE	FALSE	#dfc27d
1	Daphne-8_HMa	TRUE	FALSE	FALSE	#dfc27d
1	DGI_SP	TRUE	FALSE	FALSE	#dfc27d
1	DGLT-P_DD	FALSE	TRUE	FALSE	#dfc27d
1	DIP	TRUE	FALSE	FALSE	#dfc27d
1	DIRS1	TRUE	FALSE	FALSE	#dfc27d
1	DIRS-10_NV	TRUE	FALSE	FALSE	#dfc27d
1	DIRS-11_NV	TRUE	FALSE	FALSE	#dfc27d
1	DIRS-12_NV	TRUE	FALSE	FALSE	#dfc27d
1	DIRS-13_ACar	TRUE	FALSE	FALSE	#dfc27d
1	DIRS-15_DR	TRUE	FALSE	FALSE	#dfc27d
1	DIRS-15_NV	TRUE	FALSE	FALSE	#dfc27d
1	DIRS-16_DR	TRUE	FALSE	FALSE	#dfc27d
1	DIRS-17A_XT	TRUE	FALSE	FALSE	#dfc27d
1	DIRS-19_XT	TRUE	FALSE	FALSE	#dfc27d
1	DIRS-1_ACal	TRUE	FALSE	FALSE	#dfc27d
1	DIRS-1C_CPB	TRUE	FALSE	FALSE	#dfc27d
1	DIRS-1E_CPB	TRUE	FALSE	FALSE	#dfc27d
1	DIRS-1F-LTR_DR	TRUE	FALSE	FALSE	#dfc27d
1	DIRS-1_MLP-I	TRUE	FALSE	FALSE	#dfc27d
1	DIRS-1_NGr	TRUE	FALSE	FALSE	#dfc27d
1	DIRS-1_NV	TRUE	FALSE	FALSE	#dfc27d
1	DIRS-1_NVi	TRUE	FALSE	FALSE	#dfc27d
1	DIRS-1_PBa	TRUE	FALSE	FALSE	#dfc27d
1	DIRS-1_SK	TRUE	FALSE	FALSE	#dfc27d
1	DIRS-22_CPB	TRUE	FALSE	FALSE	#dfc27d
1	DIRS-22_NV	TRUE	FALSE	FALSE	#dfc27d
1	DIRS-23_NV	TRUE	FALSE	FALSE	#dfc27d
1	DIRS-24_NV	TRUE	FALSE	FALSE	#dfc27d
1	DIRS-24_XT	TRUE	FALSE	FALSE	#dfc27d
1	DIRS-25_NV	TRUE	FALSE	FALSE	#dfc27d
1	DIRS-26_NV	TRUE	FALSE	FALSE	#dfc27d
1	DIRS-27_XT	TRUE	FALSE	FALSE	#dfc27d
1	DIRS-28_XT	TRUE	FALSE	FALSE	#dfc27d
1	DIRS-2_CGi	TRUE	FALSE	FALSE	#dfc27d
1	DIRS-2_DPu	TRUE	FALSE	FALSE	#dfc27d
1	DIRS-2_MLP-I	TRUE	FALSE	FALSE	#dfc27d
1	DIRS-2_NV	TRUE	FALSE	FALSE	#dfc27d
1	DIRS-30_XT	TRUE	FALSE	FALSE	#dfc27d
1	DIRS-31_NV	TRUE	FALSE	FALSE	#dfc27d
1	DIRS-35_ACar	TRUE	FALSE	FALSE	#dfc27d
1	DIRS-3_CGi	TRUE	FALSE	FALSE	#dfc27d
1	DIRS-3_PGr-I	TRUE	FALSE	FALSE	#dfc27d
1	DIRS-3_SP	TRUE	FALSE	FALSE	#dfc27d
1	DIRS-44_XT	TRUE	FALSE	FALSE	#dfc27d
1	DIRS-4A_XT	TRUE	FALSE	FALSE	#dfc27d
1	DIRS-4_DPu	TRUE	FALSE	FALSE	#dfc27d
1	DIRS-4N1_DR	TRUE	FALSE	FALSE	#dfc27d
1	DIRS-4_NV	TRUE	FALSE	FALSE	#dfc27d
1	DIRS-4_SK	TRUE	FALSE	FALSE	#dfc27d
1	DIRS-5_CGi	TRUE	FALSE	FALSE	#dfc27d
1	DIRS-5_CPB	FALSE	TRUE	FALSE	#dfc27d
1	DIRS-5_NV	TRUE	FALSE	FALSE	#dfc27d
1	DIRS-5_SP	TRUE	FALSE	FALSE	#dfc27d
1	DIRS-6_NV	TRUE	FALSE	FALSE	#dfc27d
1	DIRS-8_CPB	TRUE	FALSE	FALSE	#dfc27d
1	DIRS-9A_XT	TRUE	FALSE	FALSE	#dfc27d
1	DIRS-9_NV	TRUE	FALSE	FALSE	#dfc27d
1	DIVER2_I-int	TRUE	FALSE	FALSE	#dfc27d
1	DIVER2_LTR	TRUE	FALSE	FALSE	#dfc27d
1	DIVER_LTR	TRUE	FALSE	FALSE	#dfc27d
1	DM1731_I-int	TRUE	FALSE	FALSE	#dfc27d
1	DM1731_LTR	TRUE	FALSE	FALSE	#dfc27d
1	DM176_I-int	TRUE	FALSE	FALSE	#dfc27d
1	DM176_LTR	TRUE	FALSE	FALSE	#dfc27d
1	DM297_I-int	TRUE	FALSE	FALSE	#dfc27d
1	DM297_LTR	TRUE	FALSE	FALSE	#dfc27d
1	DM412	TRUE	FALSE	FALSE	#dfc27d
1	DMRP1	TRUE	FALSE	FALSE	#dfc27d
1	DMRT1A	TRUE	FALSE	FALSE	#dfc27d
1	DMRT1B	TRUE	FALSE	FALSE	#dfc27d
1	DMRT1C	TRUE	FALSE	FALSE	#dfc27d
1	DNA-0-1_NV	TRUE	FALSE	FALSE	#dfc27d
1	DNA-0-2_NV	TRUE	FALSE	FALSE	#dfc27d
1	DNA-0-3_NV	TRUE	FALSE	FALSE	#dfc27d
1	DNA0-6_CGi	TRUE	FALSE	FALSE	#dfc27d
1	DNA-11_NV	TRUE	FALSE	FALSE	#dfc27d
1	DNA-1_FV	TRUE	FALSE	FALSE	#dfc27d
1	DNA-1_NV	TRUE	FALSE	FALSE	#dfc27d
1	DNA2-13_DR	TRUE	FALSE	FALSE	#dfc27d
1	DNA2-14C_CGi	TRUE	FALSE	FALSE	#dfc27d
1	DNA-2-14_DR	TRUE	FALSE	FALSE	#dfc27d
1	DNA2-18_CGi	TRUE	FALSE	FALSE	#dfc27d
1	DNA-2-18_DR	TRUE	FALSE	FALSE	#dfc27d
1	DNA2-1_DR	TRUE	FALSE	FALSE	#dfc27d
1	DNA-2-1_NV	TRUE	FALSE	FALSE	#dfc27d
1	DNA2-1_Tad	TRUE	FALSE	FALSE	#dfc27d
1	DNA-2-20_DR	TRUE	FALSE	FALSE	#dfc27d
1	DNA2-25_CGi	TRUE	FALSE	FALSE	#dfc27d
1	DNA2-28_CGi	TRUE	FALSE	FALSE	#dfc27d
1	DNA-2-3_DR	TRUE	FALSE	FALSE	#dfc27d
1	DNA2-6_DR	TRUE	FALSE	FALSE	#dfc27d
1	DNA-2-6_NV	TRUE	FALSE	FALSE	#dfc27d
1	DNA-2N1_PBa	TRUE	FALSE	FALSE	#dfc27d
1	DNA3-1_DF	TRUE	FALSE	FALSE	#dfc27d
1	DNA3-2_FV	TRUE	FALSE	FALSE	#dfc27d
1	DNA-3-2_NV	TRUE	FALSE	FALSE	#dfc27d
1	DNA3-3_CB	TRUE	FALSE	FALSE	#dfc27d
1	DNA35_Lch	TRUE	FALSE	FALSE	#dfc27d
1	DNA-3-7_NV	TRUE	FALSE	FALSE	#dfc27d
1	DNA-3-8_NV	TRUE	FALSE	FALSE	#dfc27d
1	DNA3-9_Mad	TRUE	FALSE	FALSE	#dfc27d
1	DNA-3A_NV	TRUE	FALSE	FALSE	#dfc27d
1	DNA-3_NV	TRUE	FALSE	FALSE	#dfc27d
1	DNA4-1_SK	TRUE	FALSE	FALSE	#dfc27d
1	DNA4-22_CGi	TRUE	FALSE	FALSE	#dfc27d
1	DNA4-26_CGi	TRUE	FALSE	FALSE	#dfc27d
1	DNA4-43_CGi	TRUE	FALSE	FALSE	#dfc27d
1	DNA4-4B_CGi	FALSE	TRUE	FALSE	#dfc27d
1	DNA-5-10_NV	TRUE	FALSE	FALSE	#dfc27d
1	DNA-5-12_NV	TRUE	FALSE	FALSE	#dfc27d
1	DNA-5-17_NV	TRUE	FALSE	FALSE	#dfc27d
1	DNA-5-18_NV	TRUE	FALSE	FALSE	#dfc27d
1	DNA-5-1_NV	TRUE	FALSE	FALSE	#dfc27d
1	DNA-5-20_NV	TRUE	FALSE	FALSE	#dfc27d
1	DNA-5-2B_DR	TRUE	FALSE	FALSE	#dfc27d
1	DNA-5-2_NV	TRUE	FALSE	FALSE	#dfc27d
1	DNA5-4_CGi	TRUE	FALSE	FALSE	#dfc27d
1	DNA-5-5A_NV	TRUE	FALSE	FALSE	#dfc27d
1	DNA-5-5_NV	TRUE	FALSE	FALSE	#dfc27d
1	DNA-5-6_NV	TRUE	FALSE	FALSE	#dfc27d
1	DNA-5-7_NV	TRUE	FALSE	FALSE	#dfc27d
1	DNA-5-8_DR	TRUE	FALSE	FALSE	#dfc27d
1	DNA-5-9_NV	TRUE	FALSE	FALSE	#dfc27d
1	DNA-5_LCh	TRUE	FALSE	FALSE	#dfc27d
1	DNA-5_NV	TRUE	FALSE	FALSE	#dfc27d
1	DNA-5_STu	TRUE	FALSE	FALSE	#dfc27d
1	DNA6-13B_CGi	TRUE	FALSE	FALSE	#dfc27d
1	DNA6-13_CGi	TRUE	FALSE	FALSE	#dfc27d
1	DNA6-14_CGi	TRUE	FALSE	FALSE	#dfc27d
1	DNA6-1B_DR	TRUE	FALSE	FALSE	#dfc27d
1	DNA6-1_DR	TRUE	FALSE	FALSE	#dfc27d
1	DNA6-1_MLP	TRUE	FALSE	FALSE	#dfc27d
1	DNA6-1_SP	FALSE	TRUE	FALSE	#dfc27d
1	DNA-6-2A_NV	TRUE	FALSE	FALSE	#dfc27d
1	DNA6-2_DR	TRUE	FALSE	FALSE	#dfc27d
1	DNA-6-2_NV	TRUE	FALSE	FALSE	#dfc27d
1	DNA-6-4_NV	TRUE	FALSE	FALSE	#dfc27d
1	DNA-6-5_NV	TRUE	FALSE	FALSE	#dfc27d
1	DNA-6-7_NV	TRUE	FALSE	FALSE	#dfc27d
1	DNA-6-8_NV	TRUE	FALSE	FALSE	#dfc27d
1	DNA-6-N5_DR	TRUE	FALSE	FALSE	#dfc27d
1	DNA-6-N7_DR	TRUE	FALSE	FALSE	#dfc27d
1	DNA-7-11_NV	TRUE	FALSE	FALSE	#dfc27d
1	DNA-7-14_NV	TRUE	FALSE	FALSE	#dfc27d
1	DNA-7-15_NV	TRUE	FALSE	FALSE	#dfc27d
1	DNA-7-17_NV	TRUE	FALSE	FALSE	#dfc27d
1	DNA7-1_MLP	TRUE	FALSE	FALSE	#dfc27d
1	DNA-7-21_NV	TRUE	FALSE	FALSE	#dfc27d
1	DNA-7-23_NV	TRUE	FALSE	FALSE	#dfc27d
1	DNA-7-2_NV	TRUE	FALSE	FALSE	#dfc27d
1	DNA-7-3_NV	TRUE	FALSE	FALSE	#dfc27d
1	DNA-7-4_NV	TRUE	FALSE	FALSE	#dfc27d
1	DNA-7-5_NV	TRUE	FALSE	FALSE	#dfc27d
1	DNA-7-7_NV	TRUE	FALSE	FALSE	#dfc27d
1	DNA-7-8_NV	TRUE	FALSE	FALSE	#dfc27d
1	DNA-7-9_NV	TRUE	FALSE	FALSE	#dfc27d
1	DNA7-N2_DR	TRUE	FALSE	FALSE	#dfc27d
1	DNA8-10_DR	TRUE	FALSE	FALSE	#dfc27d
1	DNA8-12_CB	TRUE	FALSE	FALSE	#dfc27d
1	DNA8-12_CQ	TRUE	FALSE	FALSE	#dfc27d
1	DNA-8-1_HM	TRUE	FALSE	FALSE	#dfc27d
1	DNA-8-1_NV	TRUE	FALSE	FALSE	#dfc27d
1	DNA-8-25_DR	TRUE	FALSE	FALSE	#dfc27d
1	DNA8-29_AP	TRUE	FALSE	FALSE	#dfc27d
1	DNA-8-2A_NV	TRUE	FALSE	FALSE	#dfc27d
1	DNA8-2B_CGi	TRUE	FALSE	FALSE	#dfc27d
1	DNA8-2C_CGi	TRUE	FALSE	FALSE	#dfc27d
1	DNA8-2_CGi	TRUE	FALSE	FALSE	#dfc27d
1	DNA-8-2_NV	TRUE	FALSE	FALSE	#dfc27d
1	DNA-8-36_DR	TRUE	FALSE	FALSE	#dfc27d
1	DNA8-3_CGi	TRUE	FALSE	FALSE	#dfc27d
1	DNA8-3_CQ	TRUE	FALSE	FALSE	#dfc27d
1	DNA8-3_Crp	TRUE	FALSE	FALSE	#dfc27d
1	DNA-8-3_DR	TRUE	FALSE	FALSE	#dfc27d
1	DNA-8-3_NV	TRUE	FALSE	FALSE	#dfc27d
1	DNA8-46_AP	TRUE	FALSE	FALSE	#dfc27d
1	DNA-8-4_DR	TRUE	FALSE	FALSE	#dfc27d
1	DNA8-4_DR	TRUE	FALSE	FALSE	#dfc27d
1	DNA-8-4_NV	TRUE	FALSE	FALSE	#dfc27d
1	DNA8-5_CB	TRUE	FALSE	FALSE	#dfc27d
1	DNA8-6_AP	TRUE	FALSE	FALSE	#dfc27d
1	DNA8-6_CQ	TRUE	FALSE	FALSE	#dfc27d
1	DNA8-8_CGi	TRUE	FALSE	FALSE	#dfc27d
1	DNA8-91B_AP	TRUE	FALSE	FALSE	#dfc27d
1	DNA-8B_ACar	TRUE	FALSE	FALSE	#dfc27d
1	DNA-8_NV	TRUE	FALSE	FALSE	#dfc27d
1	DNA-9-11_NV	TRUE	FALSE	FALSE	#dfc27d
1	DNA-9-12_NV	TRUE	FALSE	FALSE	#dfc27d
1	DNA-9-14_NV	TRUE	FALSE	FALSE	#dfc27d
1	DNA-9-15_NV	TRUE	FALSE	FALSE	#dfc27d
1	DNA-9-19_NV	TRUE	FALSE	FALSE	#dfc27d
1	DNA9-1_CGi	TRUE	FALSE	FALSE	#dfc27d
1	DNA-9-20_NV	TRUE	FALSE	FALSE	#dfc27d
1	DNA-9-21_NV	TRUE	FALSE	FALSE	#dfc27d
1	DNA-9-22_NV	TRUE	FALSE	FALSE	#dfc27d
1	DNA-9-23_NV	TRUE	FALSE	FALSE	#dfc27d
1	DNA-9-25_NV	TRUE	FALSE	FALSE	#dfc27d
1	DNA-9-26_NV	TRUE	FALSE	FALSE	#dfc27d
1	DNA-9-27_NV	TRUE	FALSE	FALSE	#dfc27d
1	DNA-9-28_NV	TRUE	FALSE	FALSE	#dfc27d
1	DNA9-2_AAe	TRUE	FALSE	FALSE	#dfc27d
1	DNA-9-2_NV	TRUE	FALSE	FALSE	#dfc27d
1	DNA-9-34_NV	TRUE	FALSE	FALSE	#dfc27d
1	DNA-9-36A_NV	TRUE	FALSE	FALSE	#dfc27d
1	DNA-9-37_NV	TRUE	FALSE	FALSE	#dfc27d
1	DNA-9-38_NV	TRUE	FALSE	FALSE	#dfc27d
1	DNA-9-3N_Mad	FALSE	TRUE	FALSE	#dfc27d
1	DNA-9-3_NV	TRUE	FALSE	FALSE	#dfc27d
1	DNA9-4_CGi	TRUE	FALSE	FALSE	#dfc27d
1	DNA-9-4_NV	TRUE	FALSE	FALSE	#dfc27d
1	DNA-9-5_NV	TRUE	FALSE	FALSE	#dfc27d
1	DNA9-6_DR	TRUE	FALSE	FALSE	#dfc27d
1	DNA-9-8_NV	TRUE	FALSE	FALSE	#dfc27d
1	DNA-9-9_NV	TRUE	FALSE	FALSE	#dfc27d
1	DNA9TA1_DR	TRUE	FALSE	FALSE	#dfc27d
1	DNA-N15_DR	TRUE	FALSE	FALSE	#dfc27d
1	DNAREP1_DM	TRUE	FALSE	FALSE	#dfc27d
1	DNAREP1_DSim	TRUE	FALSE	FALSE	#dfc27d
1	DNAREP1_DYak	TRUE	FALSE	FALSE	#dfc27d
1	DNAREP2_DSim	TRUE	FALSE	FALSE	#dfc27d
1	DNA-TA-10_CQ	TRUE	FALSE	FALSE	#dfc27d
1	DNA-TA-10_NV	TRUE	FALSE	FALSE	#dfc27d
1	DNA-TA-11_NV	TRUE	FALSE	FALSE	#dfc27d
1	DNA-TA-13_CQ	TRUE	FALSE	FALSE	#dfc27d
1	DNA-TA-13_NV	TRUE	FALSE	FALSE	#dfc27d
1	DNA-TA-14_NV	TRUE	FALSE	FALSE	#dfc27d
1	DNA-TA-15_NV	TRUE	FALSE	FALSE	#dfc27d
1	DNA-TA-17_NV	TRUE	FALSE	FALSE	#dfc27d
1	DNA-TA-1_NV	TRUE	FALSE	FALSE	#dfc27d
1	DNA-TA-20A_NV	TRUE	FALSE	FALSE	#dfc27d
1	DNA-TA-20_NV	TRUE	FALSE	FALSE	#dfc27d
1	DNA-TA-21_NV	TRUE	FALSE	FALSE	#dfc27d
1	DNA-TA-22A_NV	TRUE	FALSE	FALSE	#dfc27d
1	DNA-TA-22_NV	TRUE	FALSE	FALSE	#dfc27d
1	DNA-TA-27_NV	TRUE	FALSE	FALSE	#dfc27d
1	DNA-TA-2_AAe	TRUE	FALSE	FALSE	#dfc27d
1	DNA-TA-3_AAe	TRUE	FALSE	FALSE	#dfc27d
1	DNA-TA-3_NV	TRUE	FALSE	FALSE	#dfc27d
1	DNA-TA-4_NV	TRUE	FALSE	FALSE	#dfc27d
1	DNA-TA-5_AAe	TRUE	FALSE	FALSE	#dfc27d
1	DNA-TA-7_NV	TRUE	FALSE	FALSE	#dfc27d
1	DNA-TA-9A_NV	TRUE	FALSE	FALSE	#dfc27d
1	DNA-TTAA0-7_DR	TRUE	FALSE	FALSE	#dfc27d
1	DNA-TTAA-1_NV	TRUE	FALSE	FALSE	#dfc27d
1	DNA-TTAA-4_NV	TRUE	FALSE	FALSE	#dfc27d
1	DNA-TTAA-7_NV	TRUE	FALSE	FALSE	#dfc27d
1	DNA-X-10_NV	TRUE	FALSE	FALSE	#dfc27d
1	DNA-X-11_NV	TRUE	FALSE	FALSE	#dfc27d
1	DNA-X-12_DR	TRUE	FALSE	FALSE	#dfc27d
1	DNA-X-16_DR	TRUE	FALSE	FALSE	#dfc27d
1	DNAX-1_AP	TRUE	FALSE	FALSE	#dfc27d
1	DNAX-1_Tad	TRUE	FALSE	FALSE	#dfc27d
1	DNAX-2_Tad	TRUE	FALSE	FALSE	#dfc27d
1	DNA-X-3_NV	TRUE	FALSE	FALSE	#dfc27d
1	DNAX-3_Tad	TRUE	FALSE	FALSE	#dfc27d
1	DNAX-3_TCa	TRUE	FALSE	FALSE	#dfc27d
1	DNA-X-4A_NV	TRUE	FALSE	FALSE	#dfc27d
1	DNAX-4_Tad	TRUE	FALSE	FALSE	#dfc27d
1	DNA-X-5_DR	TRUE	FALSE	FALSE	#dfc27d
1	DNAX-5_Tad	TRUE	FALSE	FALSE	#dfc27d
1	DNA-X-6_NV	TRUE	FALSE	FALSE	#dfc27d
1	DNAX-6_Tad	TRUE	FALSE	FALSE	#dfc27d
1	DNA-X-7_NV	TRUE	FALSE	FALSE	#dfc27d
1	DNA-X-8_NV	TRUE	FALSE	FALSE	#dfc27d
1	DOC	TRUE	FALSE	FALSE	#dfc27d
1	DOC2_DM	TRUE	FALSE	FALSE	#dfc27d
1	DOC3_DM	TRUE	FALSE	FALSE	#dfc27d
1	DOC4_DM	TRUE	FALSE	FALSE	#dfc27d
1	DOC5_DM	TRUE	FALSE	FALSE	#dfc27d
1	Dong	TRUE	FALSE	FALSE	#dfc27d
1	Dong-1_NVe	TRUE	FALSE	FALSE	#dfc27d
1	Dong-2_Lch	TRUE	FALSE	FALSE	#dfc27d
1	DS-RICE3N	TRUE	FALSE	FALSE	#dfc27d
1	EHINV1	TRUE	FALSE	FALSE	#dfc27d
1	EN1_ZM	TRUE	FALSE	FALSE	#dfc27d
1	ENS1-LTR	TRUE	FALSE	FALSE	#dfc27d
1	EnSpm-11_HM	TRUE	FALSE	FALSE	#dfc27d
1	EnSpm11_SB	TRUE	FALSE	FALSE	#dfc27d
1	EnSpm-11_STu	TRUE	FALSE	FALSE	#dfc27d
1	EnSpm-12_OS	TRUE	FALSE	FALSE	#dfc27d
1	EnSpm-12_ZM	TRUE	FALSE	FALSE	#dfc27d
1	EnSpm-13_ZM	TRUE	FALSE	FALSE	#dfc27d
1	EnSpm-14_ZM	TRUE	FALSE	FALSE	#dfc27d
1	EnSpm-15_SBi	TRUE	FALSE	FALSE	#dfc27d
1	EnSpm-16_SBi	TRUE	FALSE	FALSE	#dfc27d
1	EnSpm-16_ZM	TRUE	FALSE	FALSE	#dfc27d
1	EnSpm-17_ZM	TRUE	FALSE	FALSE	#dfc27d
1	EnSpm1n_AT	FALSE	TRUE	FALSE	#dfc27d
1	EnSpm-1_NV	TRUE	FALSE	FALSE	#dfc27d
1	EnSpm-1_NVi	TRUE	FALSE	FALSE	#dfc27d
1	ENSPM1_PT	TRUE	FALSE	FALSE	#dfc27d
1	EnSpm-1_TM	TRUE	FALSE	FALSE	#dfc27d
1	EnSpm1_TM	FALSE	TRUE	FALSE	#dfc27d
1	EnSpm-22_SBi	TRUE	FALSE	FALSE	#dfc27d
1	EnSpm-27_SBi	TRUE	FALSE	FALSE	#dfc27d
1	EnSpm-2_ADi	TRUE	FALSE	FALSE	#dfc27d
1	EnSpm2_PTr	TRUE	FALSE	FALSE	#dfc27d
1	EnSpm-2_TM	TRUE	FALSE	FALSE	#dfc27d
1	EnSpm2_TM	FALSE	TRUE	FALSE	#dfc27d
1	EnSpm-32_SBi	TRUE	FALSE	FALSE	#dfc27d
1	EnSpm-33_SBi	TRUE	FALSE	FALSE	#dfc27d
1	EnSpm-37_SBi	TRUE	FALSE	FALSE	#dfc27d
1	EnSpm-39_SBi	TRUE	FALSE	FALSE	#dfc27d
1	EnSpm3_PT	TRUE	FALSE	FALSE	#dfc27d
1	EnSpm3_TM	TRUE	FALSE	FALSE	#dfc27d
1	EnSpm-3_VV	TRUE	FALSE	FALSE	#dfc27d
1	EnSpm-4_DR	TRUE	FALSE	FALSE	#dfc27d
1	EnSpm-4_FV	TRUE	FALSE	FALSE	#dfc27d
1	EnSpm-4_NVe	TRUE	FALSE	FALSE	#dfc27d
1	ENSPM4_OS	TRUE	FALSE	FALSE	#dfc27d
1	EnSpm-5_NVe	TRUE	FALSE	FALSE	#dfc27d
1	EnSpm-5_VV	TRUE	FALSE	FALSE	#dfc27d
1	EnSpm-6_FV	TRUE	FALSE	FALSE	#dfc27d
1	EnSpm-6_NVe	TRUE	FALSE	FALSE	#dfc27d
1	EnSpm6_SB	TRUE	FALSE	FALSE	#dfc27d
1	ENSPM7_OS	TRUE	FALSE	FALSE	#dfc27d
1	EnSpm8_SB	FALSE	TRUE	FALSE	#dfc27d
1	EnSpm-8_STu	TRUE	FALSE	FALSE	#dfc27d
1	ENSPM-9_ZM	TRUE	FALSE	FALSE	#dfc27d
1	ENSPM_MT	TRUE	FALSE	FALSE	#dfc27d
1	EnSpm-N14_SBi	TRUE	FALSE	FALSE	#dfc27d
1	EnSpm-N1_AT	FALSE	TRUE	FALSE	#dfc27d
1	EnSpm-N1_CGi	TRUE	FALSE	FALSE	#dfc27d
1	EnSpm-N1_DR	TRUE	FALSE	FALSE	#dfc27d
1	EnSpm-N1_FV	TRUE	FALSE	FALSE	#dfc27d
1	EnSpm-N1_TD	TRUE	FALSE	FALSE	#dfc27d
1	EnSpm-N2_TA	TRUE	FALSE	FALSE	#dfc27d
1	EqERV-beta1-int	TRUE	FALSE	FALSE	#dfc27d
1	ERE3	TRUE	FALSE	FALSE	#dfc27d
1	ERE4B	TRUE	FALSE	FALSE	#dfc27d
1	Erine2c	FALSE	TRUE	FALSE	#dfc27d
1	ERV1-1_CJa-I	TRUE	FALSE	FALSE	#dfc27d
1	ERV1-1_CJa-LTR	TRUE	FALSE	FALSE	#dfc27d
1	ERV1-1_CPB-I	TRUE	FALSE	FALSE	#dfc27d
1	ERV1-2-I_BT	TRUE	FALSE	FALSE	#dfc27d
1	ERV13a_MD_LTR	TRUE	FALSE	FALSE	#dfc27d
1	ERV1-3_ET-I	TRUE	FALSE	FALSE	#dfc27d
1	ERV1-3-I_BT	TRUE	FALSE	FALSE	#dfc27d
1	ERV1-3-LTR_BT	TRUE	FALSE	FALSE	#dfc27d
1	ERV1-6-LTR_XT	TRUE	FALSE	FALSE	#dfc27d
1	ERV-1_CPB-I	FALSE	TRUE	FALSE	#dfc27d
1	ERV-1_Crp-I	TRUE	FALSE	FALSE	#dfc27d
1	ERV1_MD_I-int	TRUE	FALSE	FALSE	#dfc27d
1	ERV1-N7-I_DR	TRUE	FALSE	FALSE	#dfc27d
1	ERV1X1-I_ML	TRUE	FALSE	FALSE	#dfc27d
1	ERV2-1-I_Opr	TRUE	FALSE	FALSE	#dfc27d
1	ERV2-3_FC-I	TRUE	FALSE	FALSE	#dfc27d
1	ERV2-3_Pca-I	TRUE	FALSE	FALSE	#dfc27d
1	ERV25_MD_I-int	TRUE	FALSE	FALSE	#dfc27d
1	ERV2-5_Pca-I	TRUE	FALSE	FALSE	#dfc27d
1	ERV-2B_Crp-LTR	TRUE	FALSE	FALSE	#dfc27d
1	ERV-2B_LCh-I	TRUE	FALSE	FALSE	#dfc27d
1	ERV2_DR-I	TRUE	FALSE	FALSE	#dfc27d
1	ERV2X1-I_ML	TRUE	FALSE	FALSE	#dfc27d
1	ERV3-16A3_I-int	TRUE	FALSE	FALSE	#dfc27d
1	ERV3-1_DNo-I	TRUE	FALSE	FALSE	#dfc27d
1	ERV3-1N1-I_XT	TRUE	FALSE	FALSE	#dfc27d
1	ERV39_MD_I-int	TRUE	FALSE	FALSE	#dfc27d
1	ERV-3_CPB-I	TRUE	FALSE	FALSE	#dfc27d
1	ERV-3_Crp-I	TRUE	FALSE	FALSE	#dfc27d
1	ERV47_MD_LTRb	TRUE	FALSE	FALSE	#dfc27d
1	ERV-5_AMi-I	FALSE	TRUE	FALSE	#dfc27d
1	ERV6B-MD_I-int	TRUE	FALSE	FALSE	#dfc27d
1	ERV7_MD_I-int	TRUE	FALSE	FALSE	#dfc27d
1	ERV8_MD_I-int	TRUE	FALSE	FALSE	#dfc27d
1	ERVB4_2-I_MM	FALSE	TRUE	FALSE	#dfc27d
1	ERVB5_5-I_RN	TRUE	FALSE	FALSE	#dfc27d
1	ETnERV3-int	TRUE	FALSE	FALSE	#dfc27d
1	Eulor2A	TRUE	FALSE	FALSE	#dfc27d
1	EuthAT-2	TRUE	FALSE	FALSE	#dfc27d
1	Eutr2B	TRUE	FALSE	FALSE	#dfc27d
1	Expander1_Cis	TRUE	FALSE	FALSE	#dfc27d
1	FB4_DM	TRUE	FALSE	FALSE	#dfc27d
1	FEILAI-1B_AAe	TRUE	FALSE	FALSE	#dfc27d
1	FLAM_C	TRUE	FALSE	FALSE	#dfc27d
1	FUGUREP4b	TRUE	FALSE	FALSE	#dfc27d
1	FW3_DM	TRUE	FALSE	FALSE	#dfc27d
1	FW_DM	TRUE	FALSE	FALSE	#dfc27d
1	G2_DM	TRUE	FALSE	FALSE	#dfc27d
1	G3_DM	TRUE	FALSE	FALSE	#dfc27d
1	G5A_DM	TRUE	FALSE	FALSE	#dfc27d
[truncated: 1,588 more rows]

## Sheet: TE families representing top 25% copies
# species	TEfam	present in Metazoa	Present in unicellular Holozoa	Present in Both	colorets
6	Daphne-18_HM	TRUE	TRUE	TRUE	#35978f
6	IMPB_01	TRUE	TRUE	TRUE	#35978f
5	CR1-79_HM	TRUE	TRUE	TRUE	#35978f
5	Ginger1-1_AC	TRUE	TRUE	TRUE	#35978f
4	Ag-Jock-1	TRUE	TRUE	TRUE	#35978f
4	Gypsy-24_DEl-I	TRUE	TRUE	TRUE	#35978f
4	Novosib-6_CR	TRUE	TRUE	TRUE	#35978f
4	Penelope-1_DR	TRUE	TRUE	TRUE	#35978f
4	RTAg4	TRUE	TRUE	TRUE	#35978f
4	TART_DV	TRUE	TRUE	TRUE	#35978f
3	Coprina_Cc1	TRUE	TRUE	TRUE	#35978f
3	hAT-N4_ALy	TRUE	TRUE	TRUE	#35978f
3	R5-1_SM	TRUE	TRUE	TRUE	#35978f
3	REP-4_PBa	TRUE	TRUE	TRUE	#35978f
3	Sola1-1_AC	TRUE	TRUE	TRUE	#35978f
3	Sola3-1_BF	TRUE	TRUE	TRUE	#35978f
3	EnSpm-5_HM	TRUE	FALSE	FALSE	#dfc27d
2	5S	TRUE	TRUE	TRUE	#35978f
2	DNA2-5_DR	TRUE	TRUE	TRUE	#35978f
2	DNA8-5_DR	TRUE	TRUE	TRUE	#35978f
2	EnSpm-34_SBi	TRUE	TRUE	TRUE	#35978f
2	hAT-N144_DR	TRUE	TRUE	TRUE	#35978f
2	Penelope-13_HM	TRUE	TRUE	TRUE	#35978f
2	Polinton-2A_NV	TRUE	TRUE	TRUE	#35978f
2	Polinton-2_HM	TRUE	TRUE	TRUE	#35978f
2	Polinton-8_NVi	TRUE	TRUE	TRUE	#35978f
2	5S_DM	TRUE	FALSE	FALSE	#dfc27d
2	DNA-N4_DR	FALSE	TRUE	FALSE	#dfc27d
2	ENSPM-6_DR	TRUE	FALSE	FALSE	#dfc27d
2	Gypsy-20_CSa-I	TRUE	FALSE	FALSE	#dfc27d
2	Kolobok-1_AQu	TRUE	FALSE	FALSE	#dfc27d
2	Kolobok-3_Aplcal	TRUE	FALSE	FALSE	#dfc27d
1	5S-Sauria	TRUE	FALSE	FALSE	#dfc27d
1	Academ-3_BF	TRUE	FALSE	FALSE	#dfc27d
1	Academ-5_SP	TRUE	FALSE	FALSE	#dfc27d
1	AluJb	TRUE	FALSE	FALSE	#dfc27d
1	AluJr	TRUE	FALSE	FALSE	#dfc27d
1	AluSq2	TRUE	FALSE	FALSE	#dfc27d
1	AluSx	TRUE	FALSE	FALSE	#dfc27d
1	AluSx1	TRUE	FALSE	FALSE	#dfc27d
1	AluSz	TRUE	FALSE	FALSE	#dfc27d
1	AluY	TRUE	FALSE	FALSE	#dfc27d
1	ATCopia24I	TRUE	FALSE	FALSE	#dfc27d
1	Baggins1_Cis	FALSE	TRUE	FALSE	#dfc27d
1	BATUMI_I-int	TRUE	FALSE	FALSE	#dfc27d
1	BEL1-I_SM	TRUE	FALSE	FALSE	#dfc27d
1	CACTA-1_Ccinerea	TRUE	FALSE	FALSE	#dfc27d
1	CACTA_LP	TRUE	FALSE	FALSE	#dfc27d
1	Chapaev-1_BF	TRUE	FALSE	FALSE	#dfc27d
1	Chapaev-3_HM	TRUE	FALSE	FALSE	#dfc27d
1	COP12_I_MT-int	TRUE	FALSE	FALSE	#dfc27d
1	Copia-143_SB-I	TRUE	FALSE	FALSE	#dfc27d
1	Copia-1-I_HS	TRUE	FALSE	FALSE	#dfc27d
1	Copia-1_ST-LTR	TRUE	FALSE	FALSE	#dfc27d
1	Copia-31_PX-I	TRUE	FALSE	FALSE	#dfc27d
1	Copia-58_BG-I	FALSE	TRUE	FALSE	#dfc27d
1	Copia-7_ES-I	TRUE	FALSE	FALSE	#dfc27d
1	CR1-18_NV	TRUE	FALSE	FALSE	#dfc27d
1	CR1-1b_Lch	TRUE	FALSE	FALSE	#dfc27d
1	CR1-1_CPB	TRUE	FALSE	FALSE	#dfc27d
1	CR1-30_HM	TRUE	FALSE	FALSE	#dfc27d
1	CR1-39_HM	TRUE	FALSE	FALSE	#dfc27d
1	CR1-3c_LCh	TRUE	FALSE	FALSE	#dfc27d
1	CR1-42_HM	FALSE	TRUE	FALSE	#dfc27d
1	CR1-44_HM	TRUE	FALSE	FALSE	#dfc27d
1	CR1-4_CGi	TRUE	FALSE	FALSE	#dfc27d
1	CR1-80_HM	TRUE	FALSE	FALSE	#dfc27d
1	CR1-D	TRUE	FALSE	FALSE	#dfc27d
1	Crack-8_BF	TRUE	FALSE	FALSE	#dfc27d
1	Cre-1_MB	FALSE	TRUE	FALSE	#dfc27d
1	Dada-tL_DR	TRUE	FALSE	FALSE	#dfc27d
1	Daphne-21_SPu	TRUE	FALSE	FALSE	#dfc27d
1	DIRS-24_NV	TRUE	FALSE	FALSE	#dfc27d
1	DIRS-4_DR	TRUE	FALSE	FALSE	#dfc27d
1	DIRS-4_SK	TRUE	FALSE	FALSE	#dfc27d
1	DIRS-8_NV	TRUE	FALSE	FALSE	#dfc27d
1	DMCR1A	TRUE	FALSE	FALSE	#dfc27d
1	DMRT1B	TRUE	FALSE	FALSE	#dfc27d
1	DNA10_Lch	TRUE	FALSE	FALSE	#dfc27d
1	DNA-11_CGi	TRUE	FALSE	FALSE	#dfc27d
1	DNA2-14C_CGi	TRUE	FALSE	FALSE	#dfc27d
1	DNA-2-15_DR	TRUE	FALSE	FALSE	#dfc27d
1	DNA2-25_CGi	TRUE	FALSE	FALSE	#dfc27d
1	DNA36_Lch	TRUE	FALSE	FALSE	#dfc27d
1	DNA-4A_NV	TRUE	FALSE	FALSE	#dfc27d
1	DNA-5-13_NV	TRUE	FALSE	FALSE	#dfc27d
1	DNA-5-14_NV	TRUE	FALSE	FALSE	#dfc27d
1	DNA-5-19_NV	TRUE	FALSE	FALSE	#dfc27d
1	DNA-5-2_NV	TRUE	FALSE	FALSE	#dfc27d
1	DNA-5-6_NV	TRUE	FALSE	FALSE	#dfc27d
1	DNA-5-8_NV	TRUE	FALSE	FALSE	#dfc27d
1	DNA-5-9_NV	TRUE	FALSE	FALSE	#dfc27d
1	DNA7-N2_DR	TRUE	FALSE	FALSE	#dfc27d
1	DNA8-25_DR	FALSE	TRUE	FALSE	#dfc27d
1	DNA-8-2A_NV	TRUE	FALSE	FALSE	#dfc27d
1	DNA-8-2_NV	TRUE	FALSE	FALSE	#dfc27d
1	DNA-8-3_HM	TRUE	FALSE	FALSE	#dfc27d
1	DNA9-3_DR	TRUE	FALSE	FALSE	#dfc27d
1	DNAREP1_DM	TRUE	FALSE	FALSE	#dfc27d
1	DNAREP1_DSim	TRUE	FALSE	FALSE	#dfc27d
1	DNAREP1_DYak	TRUE	FALSE	FALSE	#dfc27d
1	DNA-TA-1_NV	TRUE	FALSE	FALSE	#dfc27d
1	DNA-TA-4_NV	TRUE	FALSE	FALSE	#dfc27d
1	DNA-TA-7_NV	TRUE	FALSE	FALSE	#dfc27d
1	DNA-TA-9A_NV	TRUE	FALSE	FALSE	#dfc27d
1	DNAX-2_Tad	TRUE	FALSE	FALSE	#dfc27d
1	EnSpm-1_HV	FALSE	TRUE	FALSE	#dfc27d
1	EnSpm1_HV	TRUE	FALSE	FALSE	#dfc27d
1	EnSpm1_SB	TRUE	FALSE	FALSE	#dfc27d
1	EnSpm-2_NV	TRUE	FALSE	FALSE	#dfc27d
1	EnSpm-33_SBi	TRUE	FALSE	FALSE	#dfc27d
1	EnSpm-9_DR	FALSE	TRUE	FALSE	#dfc27d
1	EnSpm-N13_DR	TRUE	FALSE	FALSE	#dfc27d
1	EnSpm-N14_DR	TRUE	FALSE	FALSE	#dfc27d
1	EnSpm-N2_TA	TRUE	FALSE	FALSE	#dfc27d
1	ERV1-N3-I_DR	TRUE	FALSE	FALSE	#dfc27d
1	FW_DM	TRUE	FALSE	FALSE	#dfc27d
1	Ginger1-N1_DR	TRUE	FALSE	FALSE	#dfc27d
1	Ginger-1_TriAdh	TRUE	FALSE	FALSE	#dfc27d
1	Gypsy104-I_Dr	FALSE	TRUE	FALSE	#dfc27d
1	Gypsy10-PTR_I-int	FALSE	TRUE	FALSE	#dfc27d
1	Gypsy-12_Adi-I	TRUE	FALSE	FALSE	#dfc27d
1	Gypsy-12_CGi-I	TRUE	FALSE	FALSE	#dfc27d
1	Gypsy-12_DRh-I	FALSE	TRUE	FALSE	#dfc27d
1	Gypsy-13_DWil-I	TRUE	FALSE	FALSE	#dfc27d
1	Gypsy-143_AA-I	FALSE	TRUE	FALSE	#dfc27d
1	Gypsy159-I_DR	FALSE	TRUE	FALSE	#dfc27d
1	Gypsy-15_IS-I	TRUE	FALSE	FALSE	#dfc27d
1	Gypsy-16_OD-I	FALSE	TRUE	FALSE	#dfc27d
1	Gypsy-172_AA-I	TRUE	FALSE	FALSE	#dfc27d
1	Gypsy-198_DR-I	TRUE	FALSE	FALSE	#dfc27d
1	Gypsy-19_SB-I	TRUE	FALSE	FALSE	#dfc27d
1	Gypsy-1_AC-I	TRUE	FALSE	FALSE	#dfc27d
1	Gypsy-1_CMe-LTR	TRUE	FALSE	FALSE	#dfc27d
1	Gypsy-1_DSim-I	TRUE	FALSE	FALSE	#dfc27d
1	Gypsy-1-I_DP	TRUE	FALSE	FALSE	#dfc27d
1	Gypsy-217_DR-I	TRUE	FALSE	FALSE	#dfc27d
1	Gypsy-21_DEl-I	FALSE	TRUE	FALSE	#dfc27d
1	Gypsy-21_LBS-I	FALSE	TRUE	FALSE	#dfc27d
1	Gypsy-21_LCh-I	TRUE	FALSE	FALSE	#dfc27d
1	Gypsy-22-LTR_DR	FALSE	TRUE	FALSE	#dfc27d
1	Gypsy-25-I_NV	TRUE	FALSE	FALSE	#dfc27d
1	Gypsy-26_Adi-I	TRUE	FALSE	FALSE	#dfc27d
1	Gypsy-31_PM-I	TRUE	FALSE	FALSE	#dfc27d
1	Gypsy-32_CPB-I	TRUE	FALSE	FALSE	#dfc27d
1	Gypsy-39_DPu-I	TRUE	FALSE	FALSE	#dfc27d
1	Gypsy-41_AMi-I	FALSE	TRUE	FALSE	#dfc27d
1	Gypsy-44_DEl-I	FALSE	TRUE	FALSE	#dfc27d
1	Gypsy-46_Mad-I	TRUE	FALSE	FALSE	#dfc27d
1	Gypsy-52_BG-I	FALSE	TRUE	FALSE	#dfc27d
1	Gypsy-55-I_NV	TRUE	FALSE	FALSE	#dfc27d
1	Gypsy59-I_DR	TRUE	FALSE	FALSE	#dfc27d
1	Gypsy61-I_AG	TRUE	FALSE	FALSE	#dfc27d
1	Gypsy67-I_AG	TRUE	FALSE	FALSE	#dfc27d
1	Gypsy-6_Trm-I	FALSE	TRUE	FALSE	#dfc27d
1	Gypsy-71_CGi-I	TRUE	FALSE	FALSE	#dfc27d
1	Gypsy-7_RO-I	FALSE	TRUE	FALSE	#dfc27d
1	Gypsy-87_PAb-I	TRUE	FALSE	FALSE	#dfc27d
1	Gypsy89-I_DR	FALSE	TRUE	FALSE	#dfc27d
1	Gypsy8-I_Dpse	TRUE	FALSE	FALSE	#dfc27d
1	Gypsy8-I_VC	FALSE	TRUE	FALSE	#dfc27d
1	Gypsy-9_Trm-I	FALSE	TRUE	FALSE	#dfc27d
1	Harbinger-N1_SK	TRUE	FALSE	FALSE	#dfc27d
1	Harbinger-N25_NV	TRUE	FALSE	FALSE	#dfc27d
1	hAT-12_LCh	TRUE	FALSE	FALSE	#dfc27d
1	hAT-2_HM	TRUE	FALSE	FALSE	#dfc27d
1	hAT-40_HM	TRUE	FALSE	FALSE	#dfc27d
1	hAT6-2N1_SP	FALSE	TRUE	FALSE	#dfc27d
1	hAT-N1_SP	FALSE	TRUE	FALSE	#dfc27d
1	Helitron-1_NV	TRUE	FALSE	FALSE	#dfc27d
1	Helitron-1_PBa	TRUE	FALSE	FALSE	#dfc27d
1	Helitron-1_SP	TRUE	FALSE	FALSE	#dfc27d
1	Helitron-2_AC	TRUE	FALSE	FALSE	#dfc27d
1	Helitron-2_DR	TRUE	FALSE	FALSE	#dfc27d
1	Helitron-3B_PM	TRUE	FALSE	FALSE	#dfc27d
1	HELITRON7_CB	FALSE	TRUE	FALSE	#dfc27d
1	Helitron-9_CGi	TRUE	FALSE	FALSE	#dfc27d
1	Helitron-N3_CGi	TRUE	FALSE	FALSE	#dfc27d
1	HETA	TRUE	FALSE	FALSE	#dfc27d
1	HeT-A3_DVi	TRUE	FALSE	FALSE	#dfc27d
1	Homo10	TRUE	FALSE	FALSE	#dfc27d
1	IDEFIX_I-int	TRUE	FALSE	FALSE	#dfc27d
1	IS3EU-4_DR	TRUE	FALSE	FALSE	#dfc27d
1	Jockey-3_DGri	TRUE	FALSE	FALSE	#dfc27d
1	Jockey-6_DK	TRUE	FALSE	FALSE	#dfc27d
1	Kiri-18_AAe	TRUE	FALSE	FALSE	#dfc27d
1	Kolobok-3_AQu	TRUE	FALSE	FALSE	#dfc27d
1	Kolobok-N10_NV	TRUE	FALSE	FALSE	#dfc27d
1	Kolobok-N1_NV	TRUE	FALSE	FALSE	#dfc27d
1	Kolobok-N3_NV	TRUE	FALSE	FALSE	#dfc27d
1	L1-11_DR	TRUE	FALSE	FALSE	#dfc27d
1	L1-44_XT	FALSE	TRUE	FALSE	#dfc27d
1	LIN4b_SM	TRUE	FALSE	FALSE	#dfc27d
1	Mariner-1_NV	TRUE	FALSE	FALSE	#dfc27d
1	Mariner-4N1_NV	TRUE	FALSE	FALSE	#dfc27d
1	MARINER61_CB	TRUE	FALSE	FALSE	#dfc27d
1	Mariner-N1_NV	TRUE	FALSE	FALSE	#dfc27d
1	Mariner-N2_SP	TRUE	FALSE	FALSE	#dfc27d
1	Mariner-N3_CTe	TRUE	FALSE	FALSE	#dfc27d
1	Mariner-N5_HSal	TRUE	FALSE	FALSE	#dfc27d
1	MER132	TRUE	FALSE	FALSE	#dfc27d
1	MINISAT2_CB	FALSE	TRUE	FALSE	#dfc27d
1	MSAT2-MAR1_NV	TRUE	FALSE	FALSE	#dfc27d
1	MuDr-1x_SP	TRUE	FALSE	FALSE	#dfc27d
1	MuDR-N1_ZM	FALSE	TRUE	FALSE	#dfc27d
1	ORTE-4_AAe	TRUE	FALSE	FALSE	#dfc27d
1	Penelope-4_NV	TRUE	FALSE	FALSE	#dfc27d
1	Penelope-6N1_NV	TRUE	FALSE	FALSE	#dfc27d
1	piggyBac-N3_NV	TRUE	FALSE	FALSE	#dfc27d
1	Polinton-1_DR	TRUE	FALSE	FALSE	#dfc27d
1	Polinton-1N1_DR	FALSE	TRUE	FALSE	#dfc27d
1	Polinton1_SM	TRUE	FALSE	FALSE	#dfc27d
1	Polinton-N1_NV	TRUE	FALSE	FALSE	#dfc27d
1	PROTOP	TRUE	FALSE	FALSE	#dfc27d
1	PROTOP_A	TRUE	FALSE	FALSE	#dfc27d
1	PROTOP_B	TRUE	FALSE	FALSE	#dfc27d
1	ROO_I-int	TRUE	FALSE	FALSE	#dfc27d
1	RT2	TRUE	FALSE	FALSE	#dfc27d
1	RTEX-12_BF	TRUE	FALSE	FALSE	#dfc27d
1	SAR_DM	TRUE	FALSE	FALSE	#dfc27d
1	Sat-1_CPa	TRUE	FALSE	FALSE	#dfc27d
1	SAT-1_NV	TRUE	FALSE	FALSE	#dfc27d
1	SAT-2_NV	TRUE	FALSE	FALSE	#dfc27d
1	SAT-2_SK	TRUE	FALSE	FALSE	#dfc27d
1	SINE2-2_NV	TRUE	FALSE	FALSE	#dfc27d
1	STALKER4_I-int	TRUE	FALSE	FALSE	#dfc27d
1	Tc1-14_Xt	TRUE	FALSE	FALSE	#dfc27d
1	TE-10_NV	TRUE	FALSE	FALSE	#dfc27d
1	TE-3_NV	TRUE	FALSE	FALSE	#dfc27d
1	TE-7_NV	TRUE	FALSE	FALSE	#dfc27d
1	TE-8_NV	TRUE	FALSE	FALSE	#dfc27d
1	TE-X-5_DR	TRUE	FALSE	FALSE	#dfc27d
1	TguLTRK9a	FALSE	TRUE	FALSE	#dfc27d
1	Tx1-1_CGi	TRUE	FALSE	FALSE	#dfc27d
1	U6	TRUE	FALSE	FALSE	#dfc27d
1	UCON16	TRUE	FALSE	FALSE	#dfc27d
1	URR1a_Xt	TRUE	FALSE	FALSE	#dfc27d
1	Zator-1_DF	TRUE	FALSE	FALSE	#dfc27d
1	Zator-1N2_PM	TRUE	FALSE	FALSE	#dfc27d
1	Zator-1N_PM	TRUE	FALSE	FALSE	#dfc27d
1	Zator-1_PM	TRUE	FALSE	FALSE	#dfc27d
1	Zator-2_Hrobusta	TRUE	FALSE	FALSE	#dfc27d
1	Zator-N3_AAe	TRUE	FALSE	FALSE	#dfc27d
