# Supplementary material for: Dynamics of genomic innovation in the unicellular ancestry of animals
Source: eLife journal article supplement (doi:10.7554/elife.26036), 2017-07-20
Supplement: supp [file elife-26036-supp-v1.zip › elife_poa_e26036_Figure_5_Source_Data_4.odt]

## Sheet: Full1
	Result summary										Rates		Intron density
Species or LCA name	node code	node order	Ancestor? (0/1)	node age (order)	present (current sites)	gain (current sites)	loss (current sites)	present (w missing sites)	gain (w missing sites)	loss (w missing sites)	p(gain)	p(loss)	Intron per gene	Intron per kbp coding seq
Homo sapiens	Hsap	1	0	1	1106.6912157724	41.6625032607	173.2784923281	1106.6912157724	41.6625032607	178.9461673339	0.0015463505	0.1438557009	3.2359	6.6723			id	0
Ciona intestinalis	Cint	2	0	1	706.2780861906	235.5845753714	767.6136940206	706.2780861906	235.5845753714	773.2813690264	0.0087460207	0.6215309533	2.0651	4.2582			losslevel	0
Chordata	CHORD	3	1	2	1238.3072048398	79.5539583432	100.6777270875	1243.9748798456	85.0723379679	100.821488319	0.0031596033	0.0800288553	3.6374	7.4999			gainlevel	0
Saccoglossus kowalevskii	Skow	4	0	1	1079.9329543379	68.9884096766	248.4864289228	1079.9329543379	68.9884096766	248.7794855354	0.0025621144	0.1974877297	3.1577	6.5109			prob	1
Deuterostomia	DEUTERO	5	1	3	1259.4309735841	0.8560331658	18.4725397317	1259.7240301968	0.876375599	18.5968981752	3.26E-05	0.0145565977	3.6834	7.5949			root	0.0291746159
Drosophila melanogaster	Dmel	6	0	1	251.6664144974	85.6710868298	990.5185839723	251.6664144974	85.6710868298	991.7755369812	0.0031697885	0.8566197385	0.7359	1.5173			loss	1
Lottia gigantea	Lgig	7	0	1	1033.1165251904	45.8455260519	169.2429125014	1033.1165251904	45.8455260519	170.4998655103	0.001695674	0.1472661846	3.0208	6.2287			gain	1
Protostomia	PROTOS	8	1	3	1156.5139116399	10.4755598975	131.0091284077	1157.7708646487	11.5238440234	131.1975321477	4.29E-04	0.1027012774	3.3853	6.9802
Bilateria	BILATERIA	9	1	4	1277.0474801501	53.5756590895	206.0841286741	1277.444552773	53.9677975533	206.1667410809	0.0020171008	0.1442074717	3.7352	7.7017
Nematostella vectensis	Nvec	10	0	1	1222.0347642178	39.8210301125	49.3309734768	1222.0347642178	39.8210301125	49.347663796	0.0014774124	0.0400689879	3.5732	7.3677
Aiptasia sp.	Aipt	11	0	1	1214.6875932825	29.4342682467	46.2913825463	1214.6875932825	29.4342682467	46.3080728655	0.0010921417	0.03760097	3.5517	7.3234
Cnidaria	CNIDARIA	12	1	4	1231.5447075822	14.6191484527	212.6303906052	1231.5613979013	14.6350887286	212.7171871279	5.47E-04	0.1487909101	3.6011	7.4251
Bilateria+Cnidaria	EUMET	13	1	5	1429.5559497347	0.0213783483	11.4733734263	1429.6434963006	0.0218174979	11.5038565516	9.91E-07	0.0079822254	4.1802	8.6193
Trichoplax	Tadh	14	0	1	1296.1369589072	49.2079952899	194.0789811954	1296.1369589072	49.2079952899	194.196571737	0.0018399573	0.134753258	3.7899	7.8144
Bilateria+Cnidaria+Placozoa	EUMPLA	15	1	6	1441.0079448126	2.8838003624	4.3279752273	1441.1255353543	2.8924692043	4.4082626073	1.08E-04	0.0030547844	4.2138	8.6886
Mnemiopsis leidyi	Mlei	16	0	1	623.4642972929	443.4296166697	1262.4174390544	623.4642972929	443.4296166697	1262.6066481341	0.0165866636	0.8751594582	1.8230	3.7589
Oscarella carmela	Ocar	17	0	1	1022.8270219959	50.2748868545	458.0980651158	1022.8270219959	50.2748868545	458.81909809	0.0018791868	0.3205443891	2.9907	6.1666
Amphimedon queenslandica	Aque	18	0	1	1120.7636344497	90.3554631339	400.2420289413	1120.7636344497	90.3554631339	400.9630619155	0.003377252	0.2801241241	3.2771	6.7571
Porifera	PORIFERA	19	1	6	1430.6502002571	8.0025972164	19.8045166369	1431.3712332313	8.5597279493	19.8298234753	3.20E-04	0.0137456947	4.1853	8.6298
Metazoa	METAZOA	20	1	7	1442.4521196776	244.2154900448	18.1677335673	1442.6413287573	244.3315842398	20.0228107087	0.0090609662	0.0164372305	4.2182	8.6977
Monosiga brevicollis	Mbre	21	0	1	997.3309388768	88.420052068	325.4031431195	997.3309388768	88.420052068	340.7885974414	0.0032829061	0.2726933557	2.9162	6.0129
Salpingoeca rosetta	Sros	22	0	1	1185.3630854557	115.8938064175	164.8447508902	1185.3630854557	115.8938064175	180.2302052121	0.0043030512	0.1442148185	3.4660	7.1466
Choanoflagellata	CHOANOS	23	1	4	1234.3140299284	513.988267194	496.0786004658	1249.6994842503	529.2691598177	497.9022307935	0.0196283314	0.4086737247	3.6541	7.5345
Metazoa+Choanoflagellata	CHOAZOA	24	1	7	1216.4043632001	344.6892218345	41.7196841289	1218.3325552261	346.5733358173	41.9993872792	0.0127092802	0.0459684852	3.5624	7.3453
Capsaspora owczarzaki	Cowc	25	0	1	575.9865270035	82.7458318181	420.1941303091	575.9865270035	82.7458318181	420.5179115026	0.0030340885	0.4602039903	1.6842	3.4726
Filozoa (Met+Cho+Capsaspora)	FILOZOA	26	1	8	913.4348254945	11.3213677226	14.089429758	913.758606688	11.5239727413	14.1659507398	4.22E-04	0.0154664569	2.6718	5.5091
Sphaeroforma arctica	Sarc	27	0	1	796.9518170634	59.6451899025	78.1016566158	796.9518170634	59.6451899025	78.4102943762	0.00217923	0.0961192152	2.3303	4.8048
Creolimax fragrantissima	Cfra	28	0	1	832.7735500423	28.1963393528	10.8310730872	832.7735500423	28.1963393528	11.1397108476	0.0010307305	0.0136496631	2.4350	5.0208
Sphaeroforma+Creolimax	ICCFSA	29	1	2	815.4082837767	310.9217108103	639.713559723	815.7169215371	311.217119347	652.7162911535	0.0115161294	0.5640198719	2.3851	4.9180
Ichthyophonus hoferi	Ihof	30	0	1	1180.3439504873	152.3157094881	116.1718916903	1180.3439504873	152.3157094881	129.1878523445	0.0056426244	0.1116324619	3.4513	7.1163
Ichthyophonida	ICHPHO	31	1	3	1144.2001326895	269.0268574305	41.0768015823	1157.2160933437	281.9265677018	41.1620016463	0.010334683	0.0448857662	3.3837	6.9769
Chromosphaera perkinsii	Nk52	32	0	1	111.0892904065	28.8373844577	833.9981708924	111.0892904065	28.8373844577	834.1996213393	0.0010502698	0.9101813732	0.3248	0.6698
Ichthyosporea	ICHTHY	33	1	4	916.2500768412	0.0245180382	9.10E-04	916.4515272881	0.0264005284	9.12E-04	1.00E-06	1.00E-06	2.6797	5.5253
Corallochytrium limacisporum	Clim	34	0	1	5.3652713217	2.0551317713	912.9163290505	5.3652713217	2.0551317713	913.1158990514	7.54E-05	0.9963883493	0.0157	0.0323
Teretosporea	TERETO	35	1	5	916.2264686009	0.0244937829	9.13E-04	916.4260386018	0.0263686594	9.15E-04	1.00E-06	1.00E-06	2.6796	5.5251
Holozoa	HOLOZOA	36	1	9	916.2028875299	54.1692120804	91.4725568819	916.4005846865	54.3192733014	92.7908932094	0.0019974396	0.0971836023	2.6795	5.5250
Schizosaccharomyces pombe	Spom	37	0	1	207.9246417256	21.4649458683	242.2567048105	207.9246417256	21.4649458683	261.6891130297	7.74E-04	0.5839266469	0.6080	1.2536
Neurospora crassa	Ncra	38	0	1	196.9257684199	80.6973505662	312.4879828141	196.9257684199	80.6973505662	331.9203910333	0.0029094425	0.740639215	0.5758	1.1873
Ascomycota	ASCOMY	39	1	2	428.7164006678	42.2468324641	318.034153154	448.148808887	60.7713251353	319.7605801679	0.0022112439	0.4521776689	1.3104	2.7019
Cryptococcus neoformans	Cneo	40	0	1	712.0678333296	234.1746291744	226.6105172026	712.0678333296	234.1746291744	229.2448597645	0.0085227966	0.3241846893	2.0821	4.2931
Dikarya	DIKARYA	41	1	3	704.5037213577	12.4389032148	192.2689321846	707.1380639196	14.7986295286	192.6071381996	5.42E-04	0.2176438171	2.0677	4.2633
Mortierella verticillata	Mver	42	0	1	523.727792449	32.1429428371	392.7489007157	523.727792449	32.1429428371	393.3617229787	0.00117749	0.4445012192	1.5314	3.1576
Spizellomyces punctatus	Spun	43	0	1	736.6199415983	97.7760103498	245.4898190791	736.6199415983	97.7760103498	246.1026413421	0.0035815586	0.2780950571	2.1539	4.4411
Gonapodya prolifera	Gpro	44	0	1	744.4683160809	136.3079317597	276.1733660063	744.4683160809	136.3079317597	276.7861882693	0.0049930915	0.3127679765	2.1768	4.4884
Fungi	FUNGI	45	1	7	884.3337503275	40.087542162	82.0835908358	884.9465725905	40.5294171565	83.1767102111	0.001486002	0.0896645748	2.5876	5.3354
Fonticula alba	Falb	46	0	1	577.1052882718	124.5024023574	473.726913087	577.1052882718	124.5024023574	474.9909797307	0.0045677114	0.5120596028	1.6874	3.4794
Holomycota	HOLOMYC	47	1	8	926.3297990014	13.3000711904	40.4765045204	927.5938656451	13.8227102457	41.1010491951	5.07E-04	0.0430574764	2.7123	5.5925
Opisthokinta	OPISTO	48	1	10	953.5062323314	154.2554748705	7.32E-04	954.8722045946	155.3004712022	7.65E-04	0.0056703278	9.97E-07	2.7920	5.7569
Thecamonas trahens	Ttra	49	0	1	76.803122993	31.0496632965	753.4980293109	76.803122993	31.0496632965	753.819038913	0.0011338998	0.9427775725	0.2246	0.4630
Obazoa (Opistho+Apusomonadida)	OBAZOA	50	1	11	799.2514890074	0.0267599542	18.8474304661	799.5724986096	0.0269317965	19.7249967042	9.88E-07	0.0240883612	2.3379	4.8206
Dictyostelium discoideum	Ddis	51	0	1	198.9932443172	9.9963045324	191.0395198547	198.9932443172	9.9963045324	193.325179982	3.60E-04	0.5056604416	0.5819	1.1997
Polysphondylium pallidum	Ppal	52	0	1	357.3010091606	42.4886945951	65.2241450739	357.3010091606	42.4886945951	67.5098052013	0.0015282754	0.176579332	1.0447	2.1542
Dictyostelia	DICTYOS	53	1	2	380.0364596395	32.8775615862	402.7067653067	382.3221197668	35.0844290174	403.7308116057	0.0012782548	0.5376065807	1.1179	2.3050
Acanthamoeba castellanii	Acas	54	0	1	817.3406956634	274.1007904398	206.6257581365	817.3406956634	274.1007904398	207.7285971316	0.0099918578	0.2766159694	2.3899	4.9278
Amoebozoa	AMOEBO	55	1	5	749.86566336	2.7101663233	70.9166624826	750.9685023551	3.0589098421	71.3609710042	1.12E-04	0.0871118485	2.1958	4.5276
Unikonta/Amorphea	UNIK	56	1	12	818.0721595193	23.8354134294	22.1708131176	819.2705635172	23.9647246964	26.9180106445	8.67E-04	0.0331843348	2.3955	4.9394
Arabidopsis thaliana	Atha	57	0	1	1041.7160400552	28.0900927205	98.0786192168	1041.7160400552	28.0900927205	103.6904254314	0.0010380079	0.0928009642	3.0460	6.2805
Physcomitrella patens	Ppat	58	0	1	969.9200482675	39.7401744017	181.5246926857	969.9200482675	39.7401744017	187.1364989003	0.0014684775	0.1674869018	2.8360	5.8477
Embryophyta/Land plants	EMBPHY	59	1	4	1111.7045665515	266.0844342315	55.5454301971	1117.3163727661	269.0752105066	69.2645997437	0.0098680541	0.0754097891	3.2670	6.7363
Chlamydomonas reinhardtii	Crei	60	0	1	1023.9172970527	423.0735848744	162.7300537957	1023.9172970527	423.0735848744	211.9633557336	0.0154577043	0.2607741359	2.9939	6.1732
Chlorella variabilis	Cvar	61	0	1	989.6808716413	644.4312534592	418.3241477919	989.6808716413	644.4312534592	467.5574497298	0.023546268	0.5752150425	2.8938	5.9668
Chlorophyta	CHLORO	62	1	4	763.573765974	378.2493150196	515.8411115627	812.8070679119	425.8127374918	530.511431583	0.0156175068	0.578195313	2.3766	4.9004
Viridiplantae	VIRIDI	63	1	5	901.1655625171	357.7844039743	166.3046120368	917.5057620032	373.4965413493	169.6121384733	0.0135963628	0.2376369683	2.6828	5.5317
Toxoplasma gondii	Tgon	64	0	1	54.8270402855	19.9981840033	641.5955988475	54.8270402855	19.9981840033	795.1689173977	7.34E-04	0.9580490349	0.1603	0.3306
Tetrahymena thermophila	Tthe	65	0	1	452.3372046074	163.8319421892	387.9191927113	452.3372046074	163.8319421892	541.4925112616	0.00599473	0.6523853033	1.3226	2.7271
Alveolata	ALVEO	66	1	5	676.4244551296	193.6118333704	38.6354493194	829.9977736799	345.8754332897	38.8031284237	0.0124948868	0.0745544739	2.4269	5.0041
Bigelowiella natans	Bnat	67	0	1	1225.4358007761	1011.5020264803	307.5142967828	1225.4358007761	1011.5020264803	308.9916945181	0.0365518429	0.590913891	3.5831	7.3882
Ectocarpus siliculosus	Esil	68	0	1	1024.1008710815	760.0942579821	441.6854243701	1024.1008710815	760.0942579821	561.7125424187	0.0277885906	0.6802090191	2.9944	6.1743
Phytophthora infestans	Pinf	69	0	1	266.3167201255	37.5281625731	476.9034799171	266.3167201255	37.5281625731	596.9305979657	0.001374747	0.7229333921	0.7787	1.6056
Stramenopila/Heterokonta	STRAM	70	1	5	705.6920374695	215.6801996954	31.4362333045	825.7191555181	334.3967535416	31.6030668373	0.0120867711	0.0605712198	2.4144	4.9783
SAR (Stram+Alveolata+Rhizaria)	SAR	71	1	6	521.4480710786	0.0180339531	188.255733454	522.9254688138	0.0216443441	190.7175346573	8.58E-07	0.2673129148	1.5290	3.1527
Bikonta/Diaphoratickes	BIKONT	72	1	12	709.6857705795	17.148878195	123.870666823	713.6213591271	18.7572445571	127.3597348953	6.81E-04	0.1550558207	2.0866	4.3024
Naegleria gruberi	Ngru	73	0	1	73.7440140619	35.1040437953	777.7675889409	73.7440140619	35.1040437953	783.5838791988	0.001283074	0.9530081719	0.2156	0.4446
Ancestral eukaryote (root)	LECA	74	1	13	816.4075592075			822.2238494654					2.4042	4.9572
