# Supplementary material for: Dynamics of genomic innovation in the unicellular ancestry of animals
Source: eLife journal article supplement (doi:10.7554/elife.26036), 2017-07-20
Supplement: supp [file elife-26036-supp-v1.zip › elife_poa_e26036_Figure_5_Source_Data_12.odt]

## Sheet: Full1
		NMD core											Release factors		Exon junction complex					SR proteins
Species name	Abbreviation	Upf1	Upf2	Upf3	SMG1	SMG5	SMG6	SMG7	SMG5/6/7-like	SMG8	SMG9	SMG8/9-like	eRF1	eRF3	eIF4A3	Y14	Magoh	MLN51		SRSF3-7	SRSF1-9-A	SRSF1-9-B	SRSF1-9-A & B	SRSF1-9-A OR B	SRSF4-5-6-A	SRSF4-5-6-B	SRSF4-5-6-A & B	SRSF4-5-6-A OR B	SRSF2-8	TRA2	Species name	Abbreviation
Homo sapiens	Hsap	1	1	2	1	1	1	1	0	1	1	0	2	2	1	1	2	1		2	2	2	2	2	3	3	3	3	2	2	Homo sapiens	Hsap
Ciona intestinalis	Cint	0	1	1	1	1	0	1	0	1	0	0	2	1	1	1	1	0		2	1	2	1	2	4	3	3	4	1	0	Ciona intestinalis	Cint
Branchiostoma floridae	Bflo	1	1	2	2	2	0	1	0	2	0	0	3	2	2	1	2	2		8	4	4	4	4	3	4	3	4	2	2	Branchiostoma floridae	Bflo
Saccoglossus kowalevskii	Skow	2	1	1	0	0	0	1	0	1	0	0	2	1	1	1	1	2		6	2	2	2	2	2	2	2	2	1	1	Saccoglossus kowalevskii	Skow
Drosophila melanogaster	Dmel	1	1	1	1	1	0	0	0	1	0	0	2	1	1	1	1	1		4	1	1	1	1	1	1	1	1	1	1	Drosophila melanogaster	Dmel
Daphnia pulex	Dpul	1	1	1	1	1	1	1	0	1	0	0	2	1	2	1	1	4		4	1	1	1	1	1	1	1	1	1	1	Daphnia pulex	Dpul
Caenorhabditis elegans	Cele	1	1	1	1	0	1	0	0	1	0	0	2	1	2	1	1	1		2	1	1	1	1	3	2	2	3	1	1	Caenorhabditis elegans	Cele
Capitella teleta	Ctel	0	1	1	1	1	1	1	0	1	0	0	2	2	1	1	1	2		6	1	0	0	1	2	2	2	2	1	1	Capitella teleta	Ctel
Lottia gigantea	Lgig	0	1	1	1	1	1	1	0	1	0	0	2	1	1	1	1	1		5	1	1	1	1	2	2	2	2	1	1	Lottia gigantea	Lgig
Aiptasia sp.	Aipt	1	1	1	1	1	1	1	0	1	0	0	2	0	0	1	1	1		2	2	2	2	2	8	8	8	8	1	1	Aiptasia sp.	Aipt
Nematostella vectensis	Nvec	0	1	3	2	1	0	1	0	2	0	0	2	1	1	1	1	1		4	1	1	1	1	6	5	5	6	1	1	Nematostella vectensis	Nvec
Acropora digitifera	Adig	2	0	1	3	1	1	0	0	2	0	0	1/Partial	0	1	0	0	0		3	1	1	1	1	2	3	1	4	0	1	Acropora digitifera	Adig
Hydra magnipapillata (or vulgaris)	Hmag	1	1	1	0	1	0	1	0	1	0	0	2	1	1	1	1	0		4	1	1	1	1	6	6	5	7	1	1	Hydra magnipapillata (or vulgaris)	Hmag
Trichoplax adhaerens	Tadh	1	1	0	1	1	1	0	0	1	0	0	1	1	1	1	1	0		1	1	1	1	1	2	2	2	2	1	0	Trichoplax adhaerens	Tadh
Mnemiopsis leidyi	Mlei	1	1	1	0	1	1	0	0	1	0	0	2	1	1	0	1	1		15	1	1	1	1	2	1	1	2	1	0	Mnemiopsis leidyi	Mlei
Sycon ciliatum	Scil	1	1	2	2	1	1	1	0	3	0	0	2	1	1	2	1	0		5	1	1	1	1	2	2	2	2	1	2	Sycon ciliatum	Scil
Leucosolenia complicata	Lcom	1	1	1	1	1	1	1	0	1	0	0	3	1	3	1	4	0		8	4	4	1	7	4	6	2	8	4	2	Leucosolenia complicata	Lcom
Oscarella carmela	Ocar	1	1	0	1	0	0	0	0	1	0	0	3	1	1	1	1	0		1	0	1	0	1	1	1	1	1	1	1	Oscarella carmela	Ocar
Amphimedon queenslandica	Aque	1	2	0	0	0	0	0	0	0	0	0	1	1	1	1	1	0		1	1	1	1	1	1	1	1	1	1	1	Amphimedon queenslandica	Aque
Monosiga brevicollis	Mbre	1	1	1	1	0	0	0	1	0	0	1	2	1	1	1	1	2		1	1	1	1	1	0	0	0	0	1	1	Monosiga brevicollis	Mbre
Salpingoeca rosetta	Sros	1	1	0	1	0	0	0	2	0	0	1	2	1	1	1	1	1		1	1	1	1	1	0	0	0	0	1	1	Salpingoeca rosetta	Sros
Ministeria vibrans	Mvib	1	1	1	0	0	0	0	0	0	0	1	3	1	1	0	1	1		0	0	0	0	0	2	2	2	2	1	0	Ministeria vibrans	Mvib
Capsaspora owczarzaki	Cowc	1	1	1	1	0	0	0	1	0	0	1	2	1	1	1	1	0		0	0	0	0	0	1	1	1	1	1	0	Capsaspora owczarzaki	Cowc
Sphaeroforma arctica	Sarc	1	1	1	1	0	0	0	3	0	0	0	2	1	1	0	1	1		1	0	0	0	0	1	1	1	1	1	1	Sphaeroforma arctica	Sarc
Creolimax fragrantissima	Cfra	1	1	1	1	0	0	0	3	0	0	0	2	1	1	1	1	2		1	0	0	0	0	1	1	1	1	1	1	Creolimax fragrantissima	Cfra
Abeoforma whisleri	Awhi	1	1	1	1	0	0	0	3	0	0	1	2	2	1	1	1	1		1	0	0	0	0	0	1	0	1	1	1	Abeoforma whisleri	Awhi
Pirum gemmata	Pgem	1	1	1	0	0	0	0	5	0	0	1	2	1	1	1	1	1		1	0	0	0	0	1	1	1	1	1	1	Pirum gemmata	Pgem
Amoebidium parasiticum	Apar	1	2	1	2	0	0	0	3	0	0	1	2	1	1	2	1	1		3	0	0	0	0	6	2	1	7	1	1	Amoebidium parasiticum	Apar
Ichthyophonus hoferi	Ihof	1	1	1	1	0	0	0	3	0	0	1	2	1	1	1	1	1		4	0	0	0	0	3	2	1	4	1	1	Ichthyophonus hoferi	Ihof
Sphaerothecum destruens	Sdes	1	1	1	0	0	0	0	0	0	0	1	1	1	2	1	1	0		0	0	0	0	0	1	1	0	2	1	0	Sphaerothecum destruens	Sdes
Chromoshpaera perkinsii	Nk52	1	1	1	1	0	0	0	2	0	0	1	2	1	1	1	1	0		0	0	0	0	0	0	0	0	0	1	1	Chromoshpaera perkinsii	Nk52
Corallochytrium limacisporum	Clim	1	1	1	0	0	0	0	0	0	0	0	2	1	1	0	0	0		0	0	0	0	0	0	1	0	1	0	1	Corallochytrium limacisporum	Clim
Schizosaccharomyces pombe	Spom	0	1	1	0	1/LBA?	0	0	1	0	0	0	2	1	1	1	1	0		0	0	0	0	0	1	0	0	1	1	0	Schizosaccharomyces pombe	Spom
Neurospora crassa	Ncra	1	1	1	0	0	0	0	1	0	0	0	2	1	1	1	1	1		0	0	1	0	1	1	0	0	1	1	0	Neurospora crassa	Ncra
Cryptococcus neoformans	Cneo	1	1	0	0	0	0	0	1	0	0	0	2	1	1	1	1	0		0	0	0	0	0	1	0	0	1	1	2	Cryptococcus neoformans	Cneo
Ustilago maydis	Umay	1	1	1	0	0	0	0	1	0	0	0	2	1	1	1	1	0		0	0	0	0	0	0	0	0	0	1	1	Ustilago maydis	Umay
Mortierella verticillata	Mver	1	1	1	1	0	0	0	3	0	0	1	3	1	1	1	1	1		0	0	0	0	0	2	0	0	2	1	0	Mortierella verticillata	Mver
Rhizopus oryzae	Rory	1	1	1	1	0	0	0	0	0	0	1	2	1	1	0	0	0		1	0	0	0	0	2	0	0	2	0	2	Rhizopus oryzae	Rory
Allomyces macrogynus	Amac	2	2	2	0	0	0	0	3	0	0	0	4	1	2	0	1	0		2	0	0	0	0	0	0	0	0	1	0	Allomyces macrogynus	Amac
Spizellomyces punctatus	Spun	1	1	1	1	0	0	0	2	0	1	1	2	1	1	1	1	1		0	0	0	0	0	1	0	0	1	1	1	Spizellomyces punctatus	Spun
Rhizophagus irregularis	Rirr	1	1	1	1	0	0	0	3	0	0	1	2	1	1	1	2	1		1	0	0	0	0	1	1	1	1	2	1	Rhizophagus irregularis	Rirr
Rozella allomycis	Rall	1	1	1	0	0	0	0	0	0	0	0	2	1	1	1	1	0		0	0	0	0	0	0	0	0	0	1	1	Rozella allomycis	Rall
Gonapodya prolifera	Gpro	1	1	2	0	0	0	0	1	0	0	1	2	1	1	0	1	0		2	0	0	0	0	1	0	0	1	1	2	Gonapodya prolifera	Gpro
Parvularia atlantica (former Nuclearia spp.)	Nspp	1	2	1	1	0	0	0	1	0	0	0	2	1	2	0	1	0		2	2	0	0	2	0	0	0	0	1	1	Parvularia atlantica (former Nuclearia spp.)	Nspp
Fonticula alba	Falb	6	0	0	0	0	0	0	0	0	0	0	2	2	1	0	1	0		0	0	0	0	0	1	0	0	1	1	0	Fonticula alba	Falb
Thecamonas trahens	Ttra	1	0	1	0	0	0	0	1	0	0	0	2	1	0	0	0	0		1	0	0	0	0	0	0	0	0	0	0	Thecamonas trahens	Ttra
Pygsuia biforma	Pbif	0	0	2	0	0	0	0	0	0	0	0	3	3	2	0	2	0		1	0	0	0	0	0	0	0	0	2	0	Pygsuia biforma	Pbif
Nutomonas longa	Nlon	1	0	0	0	0	0	0	0	0	0	0	3	0	0	0	0	0		0	0	0	0	0	0	0	0	2	0	0	Nutomonas longa	Nlon
Dictyostelium discoideum	Ddis	1	0	1	1	0	0	0	0	0	0	1	2	1	1	1	1	0		0	0	0	0	0	1	0	0	1	1	1	Dictyostelium discoideum	Ddis
Polysphondylium pallidum	Ppal	1	0	1	1	0	0	0	0	0	0	1	2	1	1	1	1	0		0	0	0	0	0	1	0	0	1	1	1	Polysphondylium pallidum	Ppal
Acanthamoeba castellanii	Acas	1	1	2	1	0	0	0	0	0	0	1	3	1	1	1	1	1		1	0	0	0	0	0	0	0	0	1	0	Acanthamoeba castellanii	Acas
Arabidopsis thaliana	Atha	1	1	1	0	0	0	0	2	0	0	0	5	1	2	1	1	2		3	4	4	4	4	0	0	0	0	1	0	Arabidopsis thaliana	Atha
Selaginella moellendorffii	Smoe	0	2	2	2	0	0	0	3	0	0	0	6	2	1	1	1	2		1	4	4	4	4	0	0	0	0	1	0	Selaginella moellendorffii	Smoe
Physcomitrella patens	Ppat	1	1	3	1	0	0	0	3	0	0	0	5	1	2	1	3	1		2	3	3	3	3	0	0	0	0	3	0	Physcomitrella patens	Ppat
Chlamydomonas reinhardtii	Crei	1	0	1	1	0	0	0	1	0	0	0	2	1	1	1	1	1		2	2	2	2	2	0	0	0	0	1	0	Chlamydomonas reinhardtii	Crei
Volvox cartieri	Vcar	1	1	1	0	0	0	0	1	0	0	0	2	1	1	1	1	1		1	2	2	2	2	0	0	0	0	1	0	Volvox cartieri	Vcar
Chlorella variabilis	Cvar	1	1	1	0	0	0	0	1	0	0	1	2	1	1	1	0	1		1	1	1	1	1	0	0	0	0	0	0	Chlorella variabilis	Cvar
Micromonas pusilla	Mpus	1	1	1	1	0	0	0	0	0	0	0	2	1	1	1	1	0		0	0	0	0	0	0	0	0	0	1	0	Micromonas pusilla	Mpus
Cyanidioschyzon merolae	Cmer	0	0	0	0	0	0	0	0	0	0	0	2	2	0	0	0	0		1	0	0	0	0	0	0	0	0	0	0	Cyanidioschyzon merolae	Cmer
Cyanophora paradoxa	Cpar	1	0	1	0	0	0	0	1	0	0	1	2	0	1	0	1	0		0	0	0	0	0	0	0	0	0	1	0	Cyanophora paradoxa	Cpar
Ectocarpus siliculosus	Esil	1	1	1	0	0	0	0	0	0	0	0	2	1	1	2	1	1		2	2	3	2	3	0	0	0	0	1	0	Ectocarpus siliculosus	Esil
Phytophthora infestans	Pinf	1	1	1	1	0	0	0	0	0	0	0	2	1	1	1	1	0		0	2	3	2	3	0	0	0	0	1	0	Phytophthora infestans	Pinf
Toxoplasma gondii	Tgon	1	1	1	0	0	0	0	0	0	0	0	2	1	1	1	1	1		1	1	2	1	2	0	0	0	0	1	0	Toxoplasma gondii	Tgon
Tetrahymena thermophila	Tthe	2	0	1	0	0	0	0	0	0	0	0	3	1	1	1	1	0		0	0	0	0	0	0	0	0	0	1	0	Tetrahymena thermophila	Tthe
Bigelowiella natans	Bnat	0	0	1	0	0	0	0	1	0	0	1	2	2	0	1	1	1		2	1	0	0	1	0	0	0	0	1	0	Bigelowiella natans	Bnat
Emiliania huxleyi	Ehux	1	1	0	0	0	0	0	0	0	0	1	2	2	1	1	1	1		4	0	0	0	0	0	0	0	0	1	0	Emiliania huxleyi	Ehux
Guillardia theta	Gthe	1	1	1	1	0	0	0	1	0	0	1	2	2	1	2	1	1		1	3	3	3	3	0	0	0	0	1	0	Guillardia theta	Gthe
Leishmania major	Lmaj	0	0	0	0	0	0	0	0	0	0	0	1	1	1	0	1	0		0	0	0	0	0	0	0	0	0	1	0	Leishmania major	Lmaj
Naegleria gruberi	Ngru	0	0	1	1	0	0	0	0	0	0	0	2	1	1	0	1	0		0	0	0	0	0	0	0	0	0	1	0	Naegleria gruberi	Ngru
