# Supplementary material for: Dynamics of genomic innovation in the unicellular ancestry of animals
Source: eLife journal article supplement (doi:10.7554/elife.26036), 2017-07-20
Supplement: supp [file elife-26036-supp-v1.zip › elife_poa_e26036_Figure_7_Source_Data_6.odt]

## Sheet: Full1
	Result summary														Rates
Species or LCA name	node code	node order	Ancestor? (0/1)	node age (order)	contraction	expansion	gain	loss	multi	present	percentage gain	percentage loss	log(gain/loss)	gain-loss	Gain (t)	Duplication (lambda)	Loss (mu)	Transfer (kappa)		Note: gains, duplications and transfers normalized to loss=1
Homo sapiens	Hsap	1	0	1	95.708	1934.67	2825.92	633.621	3551	8770	32.22%	7.22%	0.6493303005	2192.30	2.137E-01	3.198E+00	1.000E+00	1.159E-01
Ciona intestinalis	Cint	2	0	1	374.117	115.726	374.762	2713.47	749	4239	8.84%	64.01%	-0.8597694764	-2338.71	6.515E-01	2.221E-01	1.000E+00	6.154E-03		|variation	duplication	1	1
Chordata	CHORD	3	1	2	150.567	7.43118	192.787	576.756	1107.92	6577.71	2.93%	8.77%	-0.4759143759	-383.97	1.217E-01	2.212E-03	1.000E+00	1.415E-02		|variation	loss	1	1
Saccoglossus kowalevskii	Skow	4	0	1	351.869	410.736	2436.73	2035.4	1551	7363	33.09%	27.64%	0.07815764	401.33	5.159E-01	8.825E-01	1.000E+00	4.683E-02		|variation	transfer	1	1
Deuterostomia	DEUTERO	5	1	3	4.21795	7.44694	269.02	15.4037	1261.2	6961.67	3.86%	0.22%	1.2421595166	253.62	3.050E-03	1.010E-05	1.000E+00	7.316E-01		|variation	length	1	1
Drosophila melanogaster	Dmel	6	0	1	294.168	245.182	609.36	1964.77	1039	5014	12.15%	39.19%	-0.5084377757	-1355.41	5.123E-01	3.784E-01	1.000E+00	1.193E-02		|root	Poisson	0.0263302771
Lottia gigantea	Lgig	7	0	1	256.538	232.668	686.385	1616.79	1136	5439	12.62%	29.73%	-0.3720858303	-930.41	3.787E-01	6.623E-01	1.000E+00	1.697E-02
Protostomia	PROTOS	8	1	3	88.4595	1.0182	41.7384	380.389	1166.72	6369.41	0.66%	5.97%	-0.9596921528	-338.65	7.310E-02	1.016E-05	1.000E+00	5.056E-03
Bilateria	BILATERIA	9	1	4	33.9988	71.4206	726.672	101.251	1257.66	6708.06	10.83%	1.51%	0.8559391052	625.42	2.289E-02	1.163E+00	1.000E+00	2.546E-01
Nematostella vectensis	Nvec	10	0	1	291.703	264.015	967.208	1949.21	1067	5216	18.54%	37.37%	-0.3043387508	-982.00	4.900E-01	4.974E-01	1.000E+00	1.956E-02
Aiptasia sp.	Aipt	11	0	1	226.383	850.085	4045.05	1306.05	2495	8937	45.26%	14.61%	0.4909640907	2739.00	4.589E-01	1.560E+00	1.000E+00	8.485E-02
Cnidaria	CNIDARIA	12	1	4	122.547	88.1613	546.91	431.548	1184.26	6198	8.82%	6.96%	0.1028867561	115.36	9.739E-02	3.007E-01	1.000E+00	5.014E-02
Bilateria+Cnidaria	EUMET	13	1	5	14.6554	182.706	593.133	45.1727	1210.91	6082.64	9.75%	0.74%	1.1182760381	547.96	1.174E-02	8.402E+00	1.000E+00	4.003E-01
Trichoplax	Tadh	14	0	1	286.024	197.194	633.926	1916.6	873	4252	14.91%	45.08%	-0.4804929194	-1282.67	5.917E-01	5.136E-01	1.000E+00	1.098E-02
Bilateria+Cnidaria+Placozoa	EUMPLA	15	1	6	23.2419	131.357	465.062	80.883	1024.15	5534.68	8.40%	1.46%	0.7596536038	384.18	2.078E-02	3.149E+00	1.000E+00	1.780E-01
Mnemiopsis leidyi	Mlei	16	0	1	310.721	138.31	1686.56	2512.06	643	4325	39.00%	58.08%	-0.1730282122	-825.50	8.920E-01	3.694E-01	1.000E+00	2.195E-02
Oscarella carmela	Ocar	17	0	1	412.119	88.3416	2069.62	2571.82	511	4451	46.50%	57.78%	-0.0943499567	-502.20	9.320E-01	1.151E-01	1.000E+00	2.681E-02
Amphimedon queenslandica	Aque	18	0	1	286.595	484.518	2047.62	1347.82	1397	5653	36.22%	23.84%	0.1816174664	699.80	5.843E-01	1.159E+00	1.000E+00	3.505E-02
Porifera	PORIFERA	19	1	6	75.1072	227.727	118.516	315.816	1057.44	4953.2	2.39%	6.38%	-0.4256571433	-197.30	8.402E-02	9.849E-01	1.000E+00	1.347E-02
Metazoa	METAZOA	20	1	7	68.4798	207.576	1177.4	259.387	902.224	5150.5	22.86%	5.04%	0.6569758252	918.01	8.943E-02	1.568E+00	1.000E+00	1.082E-01
Monosiga brevicollis	Mbre	21	0	1	140.447	71.0243	1219.48	1120.46	493	3896	31.30%	28.76%	0.0367783251	99.02	3.960E-01	2.253E-01	1.000E+00	2.906E-02
Salpingoeca rosetta	Sros	22	0	1	90.9577	210.366	1242.62	553.602	781	4486	27.70%	12.34%	0.3511406889	689.02	1.997E-01	1.054E+00	1.000E+00	5.308E-02
Choanoflagellata	CHOANOS	23	1	4	160.134	75.4483	499.743	935.252	584.346	3796.98	13.16%	24.63%	-0.272181926	-435.51	2.807E-01	2.118E-01	1.000E+00	1.657E-02
Metazoa+Choanoflagellata	CHOAZOA	24	1	7	82.4789	63.5366	242.644	352.124	669.952	4232.49	5.73%	8.32%	-0.1617260699	-109.48	1.100E-01	3.487E-01	1.000E+00	1.847E-02
Capsaspora owczarzaki	Cowc	25	0	1	211.362	155.904	1030.65	1356.62	664	4016	25.66%	33.78%	-0.1193470078	-325.97	5.099E-01	4.046E-01	1.000E+00	2.008E-02
Filozoa (Met+Cho+Capsaspora)	FILOZOA	26	1	8	46.8492	45.6947	364.16	207.851	686.67	4341.97	8.39%	4.79%	0.2435401221	156.31	6.440E-02	2.995E-01	1.000E+00	4.732E-02
Sphaeroforma arctica	Sarc	27	0	1	215.19	35.6771	208.932	1148.6	360	2091	9.99%	54.93%	-0.7401638504	-939.67	5.809E-01	1.570E-01	1.000E+00	3.653E-03
Creolimax fragrantissima	Cfra	28	0	1	67.0812	24.779	343.387	251.06	573	3123	11.00%	8.04%	0.1360063251	92.33	1.074E-01	1.110E-01	1.000E+00	2.631E-02
Sphaeroforma+Creolimax	ICCFSA	29	1	2	96.9033	136.917	235.82	440.6	619.138	3030.67	7.78%	14.54%	-0.2714638578	-204.78	1.877E-01	5.007E-01	1.000E+00	1.101E-02
Ichthyophonus hoferi	Ihof	30	0	1	223.891	58.9329	261.02	1682.47	250	1814	14.39%	92.75%	-0.8092735438	-1421.45	8.911E-01	9.994E-02	1.000E+00	3.429E-03
Ichthyophonida	ICHPHO	31	1	3	106.982	87.4834	94.1255	620.315	574.131	3235.45	2.91%	19.17%	-0.8189049869	-526.19	2.354E-01	1.909E-01	1.000E+00	3.805E-03
Chromosphaera perkinsii	Nk52	32	0	1	132.022	160.382	841.873	863.515	672	3740	22.51%	23.09%	-0.0110233047	-21.64	3.381E-01	8.677E-01	1.000E+00	2.246E-02
Ichthyosporea	ICHTHY	33	1	4	9.34474	0.000617871	0.0164125	46.9559	602.367	3761.64	0.00%	1.25%	-3.45651543	-46.94	1.406E-02	1.017E-05	1.000E+00	1.015E-05
Corallochytrium limacisporum	Clim	34	0	1	220.243	67.3973	326.672	1367.25	411	2768	11.80%	49.39%	-0.6217360206	-1040.58	5.522E-01	1.157E-01	1.000E+00	6.013E-03
Teretosporea	TERETO	35	1	5	66.8141	0.53087	32.1384	409.217	611.776	3808.58	0.84%	10.74%	-1.1049294154	-377.08	1.138E-01	1.016E-05	1.000E+00	2.396E-03
Holozoa	HOLOZOA	36	1	9	18.6112	20.6745	525.519	73.4446	683.499	4185.66	12.56%	1.75%	0.8546285526	452.07	2.325E-02	3.034E-01	1.000E+00	1.807E-01
Schizosaccharomyces pombe	Spom	37	0	1	110.308	154.737	178.237	686.897	425	2276	7.83%	30.18%	-0.5858937559	-508.66	3.594E-01	3.438E-01	1.000E+00	4.566E-03
Neurospora crassa	Ncra	38	0	1	101.689	141.987	415.19	389.85	484	2810	14.78%	13.87%	0.0273493463	25.34	1.963E-01	7.385E-01	1.000E+00	1.800E-02
Ascomycota	ASCOMY	39	1	2	36.2718	0.237114	15.6619	153.155	403.769	2784.66	0.56%	5.50%	-0.9902867329	-137.49	6.530E-02	1.017E-05	1.000E+00	1.989E-03
Cryptococcus neoformans	Cneo	40	0	1	155.384	47.863	232.183	715.337	324	2439	9.52%	29.33%	-0.4886802707	-483.15	3.428E-01	2.070E-01	1.000E+00	6.217E-03
Dikarya	DIKARYA	41	1	3	218.666	5.83369	82.5402	745.988	440.565	2922.15	2.82%	25.53%	-0.9560663246	-663.45	3.384E-01	9.875E-03	1.000E+00	2.303E-03
Mortierella verticillata	Mver	42	0	1	160.886	364.087	427.625	846.226	911	3167	13.50%	26.72%	-0.2964232776	-418.60	4.006E-01	7.607E-01	1.000E+00	9.943E-03
Spizellomyces punctatus	Spun	43	0	1	201.531	90.6045	626.691	734.292	587	3478	18.02%	21.11%	-0.0688153389	-107.60	2.999E-01	4.374E-01	1.000E+00	1.870E-02
Gonapodya prolifera	Gpro	44	0	1	193.667	132.358	435.817	1361.42	580	2660	16.38%	51.18%	-0.4946879595	-925.60	5.828E-01	3.750E-01	1.000E+00	7.597E-03
Fungi	FUNGI	45	1	7	63.5187	138.46	390.735	247.192	676.576	3585.6	10.90%	6.89%	0.1988479034	143.54	9.898E-02	8.539E-01	1.000E+00	3.260E-02
Fonticula alba	Falb	46	0	1	256.266	16.6522	179.574	2009.63	199	1612	11.14%	124.67%	-1.0488726487	-1830.06	1.023E+00	5.000E-02	1.000E+00	2.184E-03
Holomycota	HOLOMYC	47	1	8	85.3918	0.565837	35.7586	327.286	588.168	3442.06	1.04%	9.51%	-0.9615469211	-291.53	1.165E-01	1.017E-05	1.000E+00	2.648E-03
Opisthokinta	OPISTO	48	1	10	47.5146	3.97145	322.009	124.4	677.617	3733.59	8.62%	3.33%	0.4130476298	197.61	4.630E-02	1.017E-05	1.000E+00	5.583E-02
Thecamonas trahens	Ttra	49	0	1	237.523	128.959	1959.62	1326.59	652	4169	47.00%	31.82%	0.169435144	633.03	5.961E-01	4.458E-01	1.000E+00	3.358E-02
Obazoa (Opistho+Apusomonadida)	OBAZOA	50	1	11	0.768966	156.044	34.3265	3.18968	722.174	3535.98	0.97%	0.09%	1.0318824089	31.14	1.013E-03	9.787E+01	1.000E+00	2.673E-01
Dictyostelium discoideum	Ddis	51	0	1	68.2991	169.679	466.565	239.758	731	3274	14.25%	7.32%	0.2891390493	226.81	1.301E-01	2.542E+00	1.000E+00	2.945E-02
Polysphondylium pallidum	Ppal	52	0	1	59.8657	101.379	1196.97	354.16	668	3890	30.77%	9.10%	0.5288837567	842.81	1.484E-01	8.303E-01	1.000E+00	6.749E-02
Dictyostelia	DICTYOS	53	1	2	158.834	191.843	434.303	759.145	605.322	3047.19	14.25%	24.91%	-0.2425319066	-324.84	3.600E-01	7.428E-01	1.000E+00	1.117E-02
Acanthamoeba castellanii	Acas	54	0	1	158.155	333.696	2131.14	986.178	938	4517	47.18%	21.83%	0.3346566706	1144.96	5.144E-01	9.787E-01	1.000E+00	4.040E-02
Amoebozoa	AMOEBO	55	1	5	85.7083	82.8211	282.675	415.48	568.381	3372.03	8.38%	12.32%	-0.1672627221	-132.81	1.580E-01	3.009E-01	1.000E+00	1.612E-02
Unikonta/Amorphea	UNIK	56	1	12	0.248448	380.577	308.296	21.4841	565.56	3504.84	8.80%	0.61%	1.1568507248	286.81	8.701E-03	2.244E+01	1.000E+00	2.780E-01
Arabidopsis thaliana	Atha	57	0	1	110.771	715.1	1122.37	367.18	1840	4113	27.29%	8.93%	0.4852570324	755.19	3.060E-01	3.373E+00	1.000E+00	3.212E-02
Physcomitrella patens	Ppat	58	0	1	40.1545	887.068	840.285	229.091	2035	3969	21.17%	5.77%	0.564418583	611.19	1.255E-01	4.676E+00	1.000E+00	5.526E-02
Embryophyta/Land plants	EMBPHY	59	1	4	140.19	429.343	599.622	580.136	1040.03	3357.81	17.86%	17.28%	0.0143477424	19.49	3.479E-01	1.166E+00	1.000E+00	1.584E-02
Chlamydomonas reinhardtii	Crei	60	0	1	172.904	80.6615	564.38	888.867	436	2473	22.82%	35.94%	-0.1972651677	-324.49	4.801E-01	4.071E-01	1.000E+00	1.137E-02
Chlorella variabilis	Cvar	61	0	1	160.771	61.33	558.422	814.909	418	2541	21.98%	32.07%	-0.1641465945	-256.49	4.502E-01	1.417E-01	1.000E+00	1.201E-02
Chlorophyta	CHLORO	62	1	4	139.485	25.5065	59.9987	600.832	536.579	2797.49	2.14%	21.48%	-1.0006112143	-540.83	2.325E-01	7.845E-02	1.000E+00	2.461E-03
Viridiplantae	VIRIDI	63	1	5	136.341	25.4434	367.154	424.298	663.191	3338.32	11.00%	12.71%	-0.0628227206	-57.14	1.746E-01	7.606E-02	1.000E+00	1.889E-02
Toxoplasma gondii	Tgon	64	0	1	166.001	80.2376	323.156	1017.68	333	1724	18.74%	59.03%	-0.4981990158	-694.52	6.884E-01	2.531E-01	1.000E+00	4.964E-03
Tetrahymena thermophila	Tthe	65	0	1	123.646	248.448	1105.14	843.659	674	2680	41.24%	31.48%	0.1172503544	261.48	7.806E-01	1.322E+00	1.000E+00	1.456E-02
Alveolata	ALVEO	66	1	5	306.295	0.615099	63.9016	970.954	477.456	2418.52	2.64%	40.15%	-1.1816869228	-907.05	4.531E-01	1.017E-05	1.000E+00	1.570E-03
Bigelowiella natans	Bnat	67	0	1	251.182	162.676	1070.56	1323.14	725	3073	34.84%	43.06%	-0.0919947863	-252.58	6.773E-01	3.573E-01	1.000E+00	1.668E-02
Ectocarpus siliculosus	Esil	68	0	1	230.414	223.443	1026.68	857.598	721	3531	29.08%	24.29%	0.0781513424	169.08	4.331E-01	6.523E-01	1.000E+00	2.242E-02
Phytophthora infestans	Pinf	69	0	1	213.35	270.21	1185.54	879.457	823	3668	32.32%	23.98%	0.1297016016	306.08	4.718E-01	7.789E-01	1.000E+00	2.413E-02
Stramenopila/Heterokonta	STRAM	70	1	5	150.693	4.52941	375.085	338.746	710.297	3361.91	11.16%	10.08%	0.044255521	36.34	1.414E-01	1.016E-05	1.000E+00	2.385E-02
SAR (Stram+Alveolata+Rhizaria)	SAR	71	1	6	53.4454	137.576	61.7077	131.597	864.223	3325.57	1.86%	3.96%	-0.3289066294	-69.89	5.283E-02	1.815E+00	1.000E+00	9.624E-03
Bikonta/Diaphoratickes	BIKONT	72	1	12	2.04739	585.35	337.354	159.918	780.452	3395.46	9.94%	4.71%	0.3241885143	177.44	6.200E-02	5.637E+00	1.000E+00	4.401E-02
Naegleria gruberi	Ngru	73	0	1	13.9355	405.358	1135.48	1346.51	686	3007	37.76%	44.78%	-0.074030094	-211.03	6.995E-01	1.001E+00	1.000E+00	1.675E-02
Ancestral eukaryote (root)	LECA	74	1	13	0	0	0	0	177.348	3218.03	0.00%	0.00%
