# Supplementary material for: Dynamics of genomic innovation in the unicellular ancestry of animals
Source: eLife journal article supplement (doi:10.7554/elife.26036), 2017-07-20
Supplement: supp [file elife-26036-supp-v1.zip › elife_poa_e26036_Figure_7_Source_Data_9.odt]

## Sheet: Full1
	Result summary
Species or LCA name	node code	node order	Ancestor? (0/1)	node age (order)	present	gain	loss	percentage gain	percentage loss	log(gain/loss)	gain-loss		Present-HOLOZOA	Present-OPISTO	Present-LECA
Homo sapiens	Hsap	1	0	1	5914	878	142	14.85%	2.40%	0.7912061715	736.00		423.00	416.00	823.00
Ciona intestinalis	Cint	2	0	1	4063	3	1118	0.07%	27.52%	-2.5713205488	-1115.00		-1428.00	-1435.00	-1028.00
Chordata	CHORD	3	1	2	5178	16	174	0.31%	3.36%	-1.0364292656	-158.00		-313.00	-320.00	87.00
Saccoglossus kowalevskii	Skow	4	0	1	4840	3	499	0.06%	10.31%	-2.2209792909	-496.00		-651.00	-658.00	-251.00
Deuterostomia	DEUTERO	5	1	3	5336	63	130	1.18%	2.44%	-0.3146028029	-67.00		-155.00	-162.00	245.00
Drosophila melanogaster	Dmel	6	0	1	4314	124	854	2.87%	19.80%	-0.8380361855	-730.00		-1177.00	-1184.00	-777.00
Lottia gigantea	Lgig	7	0	1	4739	8	313	0.17%	6.60%	-1.5924543506	-305.00		-752.00	-759.00	-352.00
Protostomia	PROTOS	8	1	3	5044	5	364	0.10%	7.22%	-1.8621313793	-359.00		-447.00	-454.00	-47.00
Bilateria	BILATERIA	9	1	4	5403	137	261	2.54%	4.83%	-0.2799199402	-124.00		-88.00	-95.00	312.00
Nematostella vectensis	Nvec	10	0	1	4705	91	521	1.93%	11.07%	-0.757796331	-430.00		-786.00	-793.00	-386.00
Aiptasia sp.	Aipt	11	0	1	4781	35	389	0.73%	8.14%	-1.045881557	-354.00		-710.00	-717.00	-310.00
Cnidaria	CNIDARIA	12	1	4	5135	9	401	0.18%	7.81%	-1.6489018632	-392.00		-356.00	-363.00	44.00
Bilateria+Cnidaria	EUMET	13	1	5	5527	165	54	2.99%	0.98%	0.4850901844	111.00		36.00	29.00	436.00
Trichoplax	Tadh	14	0	1	3997	28	1447	0.70%	36.20%	-1.7133104998	-1419.00		-1494.00	-1501.00	-1094.00
Bilateria+Cnidaria+Placozoa	EUMPLA	15	1	6	5416	53	194	0.98%	3.58%	-0.5635258603	-141.00		-75.00	-82.00	325.00
Mnemiopsis leidyi	Mlei	16	0	1	3585	6	1978	0.17%	55.17%	-2.5180750369	-1972.00		-1906.00	-1913.00	-1506.00
Oscarella carmela	Ocar	17	0	1	3325	25	1394	0.75%	41.92%	-1.7463227651	-1369.00		-2166.00	-2173.00	-1766.00
Amphimedon queenslandica	Aque	18	0	1	4351	87	430	2.00%	9.88%	-0.693949203	-343.00		-1140.00	-1147.00	-740.00
Porifera	PORIFERA	19	1	6	4694	7	870	0.15%	18.53%	-2.0944212126	-863.00		-797.00	-804.00	-397.00
Metazoa	METAZOA	20	1	7	5557	376	149	6.77%	2.68%	0.4020015765	227.00		66.00	59.00	466.00
Monosiga brevicollis	Mbre	21	0	1	3308	2	651	0.06%	19.68%	-2.5125509929	-649.00		-2183.00	-2190.00	-1783.00
Salpingoeca rosetta	Sros	22	0	1	3689	11	279	0.30%	7.56%	-1.4042115181	-268.00		-1802.00	-1809.00	-1402.00
Choanoflagellata	CHOANOS	23	1	4	3957	3	1376	0.08%	34.77%	-2.6614971792	-1373.00		-1534.00	-1541.00	-1134.00
Metazoa+Choanoflagellata	CHOAZOA	24	1	7	5330	61	60	1.14%	1.13%	0.0071785846	1.00		-161.00	-168.00	239.00
Capsaspora owczarzaki	Cowc	25	0	1	3586	6	1749	0.17%	48.77%	-2.4646385591	-1743.00		-1905.00	-1912.00	-1505.00
Filozoa (Met+Cho+Capsaspora)	FILOZOA	26	1	8	5329	45	207	0.84%	3.88%	-0.6627578317	-162.00		-162.00	-169.00	238.00
Sphaeroforma arctica	Sarc	27	0	1	3292	9	419	0.27%	12.73%	-1.6679715135	-410.00		-2199.00	-2206.00	-1799.00
Creolimax fragrantissima	Cfra	28	0	1	3497	6	211	0.17%	6.03%	-1.5461312049	-205.00		-1994.00	-2001.00	-1594.00
Sphaeroforma+Creolimax	ICCFSA	29	1	2	3702	6	179	0.16%	4.84%	-1.4747017806	-173.00		-1789.00	-1796.00	-1389.00
Ichthyophonus hoferi	Ihof	30	0	1	2443	1	1433	0.04%	58.66%	-3.1562461904	-1432.00		-3048.00	-3055.00	-2648.00
Ichthyophonida	ICHPHO	31	1	3	3875	2	606	0.05%	15.64%	-2.4814426285	-604.00		-1616.00	-1623.00	-1216.00
Chromosphaera perkinsii	Nk52	32	0	1	3802	12	689	0.32%	18.12%	-1.7590379759	-677.00		-1689.00	-1696.00	-1289.00
Ichthyosporea	ICHTHY	33	1	4	4479	1	134	0.02%	2.99%	-2.1271047984	-133.00		-1012.00	-1019.00	-612.00
Corallochytrium limacisporum	Clim	34	0	1	3290	9	1331	0.27%	40.46%	-2.169935546	-1322.00		-2201.00	-2208.00	-1801.00
Teretosporea	TERETO	35	1	5	4612	4	883	0.09%	19.15%	-2.3439007122	-879.00		-879.00	-886.00	-479.00
Holozoa	HOLOZOA	36	1	9	5491	154	161	2.80%	2.93%	-0.0193051552	-7.00		0.00	-7.00	400.00
Schizosaccharomyces pombe	Spom	37	0	1	3088	38	689	1.23%	22.31%	-1.2584356253	-651.00			-2410.00	-2003.00
Neurospora crassa	Ncra	38	0	1	3622	66	183	1.82%	5.05%	-0.4429071542	-117.00			-1876.00	-1469.00
Ascomycota	ASCOMY	39	1	2	3739	43	121	1.15%	3.24%	-0.4493169147	-78.00			-1759.00	-1352.00
Cryptococcus neoformans	Cneo	40	0	1	3200	8	625	0.25%	19.53%	-1.8927900304	-617.00			-2298.00	-1891.00
Dikarya	DIKARYA	41	1	3	3817	27	734	0.71%	19.23%	-1.4343322958	-707.00			-1681.00	-1274.00
Mortierella verticillata	Mver	42	0	1	3620	15	919	0.41%	25.39%	-1.7872242523	-904.00			-1878.00	-1471.00
Spizellomyces punctatus	Spun	43	0	1	3709	9	824	0.24%	22.22%	-1.9616847023	-815.00			-1789.00	-1382.00
Gonapodya prolifera	Gpro	44	0	1	3432	7	1099	0.20%	32.02%	-2.1958996524	-1092.00			-2066.00	-1659.00
Fungi	FUNGI	45	1	7	4524	104	96	2.30%	2.12%	0.0347621063	8.00			-974.00	-567.00
Fonticula alba	Falb	46	0	1	2457	1	2060	0.04%	83.84%	-3.3138672204	-2059.00			-3041.00	-2634.00
Holomycota	HOLOMYC	47	1	8	4516	5	987	0.11%	21.86%	-2.2953471483	-982.00			-982.00	-575.00
Opisthokinta	OPISTO	48	1	10	5498	219	25	3.98%	0.45%	0.9425041062	194.00			0.00	407.00
Thecamonas trahens	Ttra	49	0	1	3323	23	2004	0.69%	60.31%	-1.9401698812	-1981.00				-1768.00
Obazoa (Opistho+Apusomonadida)	OBAZOA	50	1	11	5304	58	42	1.09%	0.79%	0.1401787032	16.00				213.00
Dictyostelium discoideum	Ddis	51	0	1	3308	15	195	0.45%	5.89%	-1.1139433523	-180.00				-1783.00
Polysphondylium pallidum	Ppal	52	0	1	3286	9	211	0.27%	6.42%	-1.3700399459	-202.00				-1805.00
Dictyostelia	DICTYOS	53	1	2	3488	13	604	0.37%	17.32%	-1.6670935863	-591.00				-1603.00
Acanthamoeba castellanii	Acas	54	0	1	3414	17	682	0.50%	19.98%	-1.6033354533	-665.00				-1677.00
Amoebozoa	AMOEBO	55	1	5	4079	6	1215	0.15%	29.79%	-2.3064250276	-1209.00				-1012.00
Unikonta/Amorphea	UNIK	56	1	12	5288	208	11	3.93%	0.21%	1.2766706498	197.00				197.00
Arabidopsis thaliana	Atha	57	0	1	4013	106	364	2.64%	9.07%	-0.5357955184	-258.00				-1078.00
Physcomitrella patens	Ppat	58	0	1	4161	72	182	1.73%	4.37%	-0.4027388916	-110.00				-930.00
Embryophyta/Land plants	EMBPHY	59	1	4	4271	163	407	3.82%	9.53%	-0.3974068048	-244.00				-820.00
Chlamydomonas reinhardtii	Crei	60	0	1	3297	19	544	0.58%	16.50%	-1.4568452987	-525.00				-1794.00
Chlorella variabilis	Cvar	61	0	1	3344	9	487	0.27%	14.56%	-1.7332864518	-478.00				-1747.00
Chlorophyta	CHLORO	62	1	4	3822	4	697	0.10%	18.24%	-2.2411727868	-693.00				-1269.00
Viridiplantae	VIRIDI	63	1	5	4515	88	691	1.95%	15.30%	-0.8949953752	-603.00				-576.00
Toxoplasma gondii	Tgon	64	0	1	2278	15	763	0.66%	33.49%	-1.7064332789	-748.00				-2813.00
Tetrahymena thermophila	Tthe	65	0	1	2572	15	469	0.58%	18.23%	-1.4950815837	-454.00				-2519.00
Alveolata	ALVEO	66	1	5	3026	0	1583	0.00%	52.31%	Err:502	-1583.00				-2065.00
Bigelowiella natans	Bnat	67	0	1	3644	39	1004	1.07%	27.55%	-1.4106691058	-965.00				-1447.00
Ectocarpus siliculosus	Esil	68	0	1	3454	11	563	0.32%	16.30%	-1.7091157097	-552.00				-1637.00
Phytophthora infestans	Pinf	69	0	1	3376	10	640	0.30%	18.96%	-1.806179974	-630.00				-1715.00
Stramenopila/Heterokonta	STRAM	70	1	5	4006	1	604	0.02%	15.08%	-2.7810369386	-603.00				-1085.00
SAR (Stram+Alveolata+Rhizaria)	SAR	71	1	6	4609	3	512	0.07%	11.11%	-2.2321487063	-509.00				-482.00
Bikonta/Diaphoratickes	BIKONT	72	1	12	5118	140	113	2.74%	2.21%	0.0930495922	27.00				27.00
Naegleria gruberi	Ngru	73	0	1	3055	29	2065	0.95%	67.59%	-1.8525220581	-2036.00				-2036.00
Ancestral eukaryote (root)	LECA	74	1	13	5091	NA	NA	#VALUE!	#VALUE!
