# Supplementary material for: Dynamics of genomic innovation in the unicellular ancestry of animals
Source: eLife journal article supplement (doi:10.7554/elife.26036), 2017-07-20
Supplement: supp [file elife-26036-supp-v1.zip › elife_poa_e26036_Table_1_Source_Data_13.odt]

## Sheet: Full1_2
Family	dom1	dom2	Metazoa	Choanozoa	Filozoa	Holozoa	Opisthokonta	Obazoa	Unikonta	LECA or before
OG0000000	Ank_2	Ank	0	0	0	0	0	0	7.10E-10	1
OG0000000	Ank_2	Ank_3	6.41E-09	2.99E-11	9.08E-13	2.16E-08	6.39E-12	1.08E-09	1.28E-04	1
OG0000000	Ank_2	Ank_4	0	0	0	0	0	0	1.86E-09	1
OG0000000	Ank_2	Ank_5	0	0	0	2.35E-13	1.40E-14	1.24E-12	1.35E-07	1
OG0000000	Ank_2	Death	9.15E-01	5.10E-02	2.59E-02	4.78E-03	4.78E-04	2.42E-05	4.18E-05	0
OG0000000	Ank_2	Ion_trans	9.74E-02	5.48E-01	2.94E-01	5.44E-02	5.35E-03	2.21E-04	3.80E-04	1
OG0000000	Ank_2	IQ	8.30E-04	3.36E-02	1.71E-02	7.21E-01	7.08E-02	2.87E-03	4.92E-03	1
OG0000000	Ank_2	KH_1	9.23E-01	4.51E-02	2.27E-02	4.19E-03	4.20E-04	2.18E-05	1.28E-03	0
OG0000000	Ank_2	PARP	0.9043157861	0.0440894069	0.0221910249	0.0040968528	4.11E-04	2.14E-05	3.72E-05	0
OG0000000	Ank_2	PDZ	1.97E-02	6.08E-01	3.05E-01	5.59E-02	5.49E-03	2.27E-04	3.89E-04	1
OG0000000	Ank_2	Pkinase	0.0044520414	2.01E-06	1.38E-06	0.0014615833	2.63E-05	8.97E-05	1.34E-04	1
OG0000000	Ank_2	SAM_1	9.42E-05	0.0067383845	0.8150619873	0.1583920133	0.015598869	6.36E-04	0.0010936811	1
OG0000000	Ank_2	SAM_2	0.1523336764	0.0072789462	0.7007786028	1.28E-01	1.26E-02	5.14E-04	8.81E-04	1
OG0000000	Ank_2	SH3_2	0.0028446137	0.0082254562	0.7897005239	0.1447485834	1.42E-02	5.79E-04	9.92E-04	1
OG0000000	Ank_2	SOCS_box	0.0174604842	0.0974484746	0.0522959752	0.7500556345	7.37E-02	2.98E-03	5.12E-03	1
OG0000000	Ank_3	Ank	0.1620440475	0.479545657	0.2407702562	0.0441046723	0.0043259613	1.79E-04	2.04E-02	1
OG0000000	Ank_3	Ank_2	1.75E-07	1.14E-08	1.27E-08	1.15E-04	6.67E-09	2.63E-08	2.79E-06	1
OG0000000	Ank_3	Ank_4	0.0034052028	1.75E-02	9.12E-03	0.0015937868	4.90E-05	3.44E-04	1.01E-01	1
OG0000000	Ank_3	Ank_5	0.0227456093	6.73E-02	0.0336482661	0.7723098144	0.0757508349	3.07E-03	5.25E-03	1
OG0000000	Ank_4	Ank	7.76E-07	7.25E-07	3.93E-04	4.20E-05	4.99E-08	6.56E-09	3.91E-06	1
OG0000000	Ank_4	Ank_2	0	0	0	0	0	0.00E+00	6.90E-09	1
OG0000000	Ank_4	Ank_3	4.68E-05	3.05E-06	1.18E-04	0.001607381	4.05E-05	1.38E-04	5.28E-02	1
OG0000000	Ank_4	Ank_5	1.95E-08	1.36E-05	1.63E-08	6.72E-06	6.70E-09	7.84E-08	5.08E-04	1
OG0000000	Ank_4	Death	0.9198907902	0.0460838518	0.0232328891	0.0042888262	4.30E-04	2.22E-05	3.85E-05	0
OG0000000	Ank_4	Ion_trans	0.1636643272	0.5195707014	0.2631796438	4.83E-02	4.74E-03	1.97E-04	3.37E-04	1
OG0000000	Ank_4	PARP	9.04E-01	4.41E-02	2.22E-02	4.10E-03	4.11E-04	2.14E-05	3.72E-05	0
OG0000000	Ank_4	SAM_1	0.0057376288	0.0084634503	0.8172394075	0.1500830467	1.47E-02	6.00E-04	1.03E-03	1
OG0000000	Ank_4	SAM_2	9.15E-01	4.48E-02	2.26E-02	4.17E-03	4.18E-04	2.17E-05	3.77E-05	0
OG0000000	Ank_4	SH3_2	0.0029599207	0.0084827058	0.8137844705	0.1491641963	1.46E-02	5.96E-04	0.0010220354	1
OG0000000	Ank_5	Ank	1.39E-04	1.58E-06	1.25E-04	0.0017233479	5.66E-05	3.92E-04	6.75E-04	1
OG0000000	Ank_5	Ank_2	0	2.34E-14	9.64E-13	6.03E-08	2.72E-12	7.00E-10	6.20E-05	1
OG0000000	Ank_5	Ank_4	6.06E-06	1.01E-06	1.57E-04	2.75E-03	1.66E-04	6.54E-06	7.45E-04	1
OG0000000	Ank_5	Ion_trans	0.1667825792	4.89E-01	2.45E-01	4.49E-02	4.42E-03	1.83E-04	3.14E-04	1
OG0000000	Ank_5	SOCS_box	0.9144722619	0.0449108688	0.022613786	4.17E-03	4.19E-04	2.18E-05	3.77E-05	0
OG0000000	Ank	Ank_2	0.00E+00	0.00E+00	0.00E+00	2.28E-14	0.00E+00	1.20E-12	3.96E-05	1
OG0000000	Ank	Ank_3	0.0163350308	5.86E-04	0.056237029	0.7974363441	0.0782201107	0.0031650133	4.14E-02	1
OG0000000	Ank	Ank_4	2.18E-06	1.08E-07	9.60E-08	6.14E-04	1.01E-07	2.14E-07	5.88E-04	1
OG0000000	Ank	Ank_5	1.74E-05	1.79E-06	6.97E-06	7.01E-05	2.87E-05	8.96E-07	7.13E-04	1
OG0000000	Ank	Ion_trans	1.73E-01	5.10E-01	2.56E-01	4.68E-02	4.60E-03	1.91E-04	3.27E-04	1
OG0000000	Ank	PARP	8.78E-01	4.28E-02	2.15E-02	3.98E-03	3.99E-04	2.10E-05	3.64E-05	1
OG0000000	Ank	SAM_2	8.78E-01	4.28E-02	2.15E-02	3.98E-03	3.99E-04	2.10E-05	3.64E-05	1
OG0000000	FERM_f0	Ank_2	0.0044959341	0.0063676178	0.6119800897	0.1121544327	1.82E-01	7.34E-03	1.26E-02	1
OG0000000	SAM_2	PARP	0.9232808184	0.045035256	0.0226654595	0.0041836982	4.20E-04	2.18E-05	3.78E-05	0
OG0000000	SH3_1	Ank_2	7.66E-05	2.32E-06	2.67E-05	5.16E-04	8.86E-01	3.58E-02	6.15E-02	1
OG0000001	SET	zf-C2H2	0.9221954494	0.0475219558	0.0239994157	0.0044305122	4.44E-04	2.28E-05	3.95E-05	0
OG0000001	SET	zf-C2H2_6	0.9237871583	0.0450605089	0.0226781262	0.0041860169	4.20E-04	2.18E-05	3.78E-05	0
OG0000001	zf-C2H2_4	zf-C2H2	6.13E-01	0.1053613993	0.0577916675	9.03E-02	9.83E-02	3.99E-03	6.85E-03	1
OG0000001	zf-C2H2_4	zf-C2H2_6	0.8016792281	0.1126466095	0.0607432347	0.0112833374	0.012370656	5.05E-04	8.67E-04	1
OG0000001	zf-C2H2_4	zf-met	0.8355399458	0.0496057791	0.0252755412	0.0046651309	1.49E-02	6.09E-04	1.04E-03	1
OG0000001	zf-C2H2_6	zf-C2H2	0.0100992724	0.0047328926	0.002871705	4.54E-04	0.7177651066	2.91E-02	0.0502260577	1
OG0000001	zf-C2H2_6	zf-C2H2_4	0.5092250818	4.74E-02	2.48E-02	4.54E-03	2.57E-01	1.04E-02	1.79E-02	1
OG0000001	zf-C2H2_6	zf-met	0.7271704617	0.1593463625	0.0901191325	0.0168593032	3.51E-03	1.47E-04	2.52E-04	1
OG0000001	zf-C2H2	zf-C2H2_4	7.64E-03	6.62E-04	1.66E-04	3.96E-04	4.71E-02	1.94E-03	3.39E-03	1
OG0000001	zf-C2H2	zf-C2H2_6	7.15E-06	1.81E-04	1.84E-07	2.78E-04	5.00E-01	2.49E-02	5.33E-02	1
OG0000001	zf-C2H2	zf-H2C2_5	8.73E-01	5.34E-02	2.73E-02	0.0050358169	8.30E-03	3.40E-04	5.84E-04	1
OG0000001	zf-C2H2	zf-met	3.49E-01	7.66E-02	4.32E-02	8.04E-03	1.30E-02	5.30E-04	3.07E-02	1
OG0000001	zf-H2C2_2	zf-C2H2	0.8880557077	0.0605779405	0.0311281401	5.75E-03	5.74E-04	2.80E-05	4.85E-05	1
OG0000001	zf-H2C2_5	zf-C2H2	8.80E-01	5.24E-02	2.67E-02	4.93E-03	4.93E-04	2.47E-05	4.29E-05	1
OG0000001	zf-H2C2_5	zf-met	0.8632929324	0.04625553	0.0234212788	0.004326393	4.34E-04	2.24E-05	3.88E-05	1
OG0000001	zf-met	zf-C2H2	0.6053667599	0.1690116669	0.0986902292	0.0185460448	3.84E-03	1.60E-04	2.72E-04	1
OG0000001	zf-met	zf-C2H2_6	0.7867412686	0.1266372666	0.0693472988	0.0129116927	2.69E-03	1.14E-04	1.95E-04	1
OG0000001	zf-met	zf-H2C2_5	0.8693850662	0.0475255344	0.0240921182	0.0044502189	4.46E-04	2.28E-05	3.96E-05	1
OG0000002	Ank_2	Pkinase_Tyr	5.37E-07	1.20E-08	1.02E-10	4.42E-07	3.51E-10	4.37E-08	6.20E-04	1
OG0000002	Ank_4	Pkinase_Tyr	7.62E-05	2.03E-06	8.07E-08	1.58E-04	0.0019829943	6.76E-03	1.16E-02	1
OG0000002	Ank_5	Pkinase_Tyr	2.72E-04	5.76E-04	9.34E-05	0.1499124176	0.1628220542	0.00658227	0.3812858998	1
OG0000002	Ank	Pkinase_Tyr	7.47E-01	3.67E-02	1.85E-02	3.39E-03	3.21E-04	2.84E-03	1.67E-01	1
OG0000002	C1_1	Pkinase_Tyr	2.38E-01	1.14E-02	5.63E-03	6.25E-01	6.13E-02	2.48E-03	4.26E-03	1
OG0000002	Death	Pkinase	8.76E-01	4.27E-02	2.15E-02	3.97E-03	3.99E-04	2.09E-05	3.63E-05	1
OG0000002	LIM	Pkinase_Tyr	1.87E-02	6.92E-04	6.65E-02	3.18E-01	3.11E-02	1.26E-03	4.48E-01	1
OG0000003	LRR_1	LRR_6	3.48E-04	1.77E-03	1.70E-01	3.11E-02	1.02E-01	4.11E-03	7.03E-03	1
OG0000005	Asp_protease_2	rve	4.60E-05	1.80E-04	0.0174346684	2.49E-01	2.44E-02	9.86E-04	5.60E-01	1
OG0000005	Asp_protease_2	RVT_1	1.29E-05	5.98E-05	0.0144571441	0.2400159631	2.39E-02	9.76E-04	5.68E-01	1
OG0000005	Retrotrans_gag	rve	0.010192857	0.0576074154	0.0288035414	0.8093213129	7.94E-02	3.21E-03	5.51E-03	1
OG0000005	Retrotrans_gag	RVT_1	0.0102191397	0.0578533236	0.0289426639	0.8132955147	7.98E-02	3.23E-03	5.54E-03	1
OG0000005	rve	Chromo	1.17E-05	4.97E-05	2.13E-02	6.77E-01	6.81E-02	2.80E-03	1.82E-01	1
OG0000005	rve	RVT_1	1.47E-01	7.25E-03	6.99E-01	1.28E-01	1.26E-02	5.13E-04	8.80E-04	1
OG0000005	RVT_1	rve	6.69E-11	5.40E-11	1.05E-06	4.00E-04	8.63E-04	5.37E-05	6.38E-01	1
OG0000005	RVT_1	zf-H2C2	7.08E-05	5.94E-04	5.90E-02	8.47E-01	8.32E-02	3.37E-03	5.78E-03	1
OG0000005	SCAN	rve	8.70E-01	4.33E-02	2.19E-02	4.04E-03	4.05E-04	2.12E-05	3.68E-05	1
OG0000005	zf-CCHC	rve	9.30E-02	5.58E-01	2.85E-01	5.23E-02	5.14E-03	2.12E-04	5.72E-03	1
OG0000005	zf-CCHC	RVT_1	8.74E-02	5.03E-01	2.54E-01	4.66E-02	4.57E-03	1.89E-04	8.39E-02	1
OG0000005	zf-H2C2	rve	2.04E-05	1.46E-04	1.70E-02	7.67E-01	7.68E-02	3.14E-03	1.07E-01	1
OG0000006	Ank_2	Pkinase_Tyr	0.1610893157	0.4724108491	0.2369108961	0.0433930996	0.0042596847	1.77E-04	0.0102421568	1
OG0000006	Ank_2	SH2	0.167200128	0.4903398826	0.2459096249	0.0450450325	4.43E-03	1.84E-04	3.15E-04	1
OG0000006	BTK	Pkinase_Tyr	0.1469892068	0.0069825161	0.6727821466	1.23E-01	1.21E-02	4.94E-04	8.46E-04	1
OG0000006	BTK	SH2	0.1469892068	0.0069825161	0.6727821466	1.23E-01	1.21E-02	4.94E-04	8.46E-04	1
OG0000006	BTK	SH3_1	0.1469892068	0.0069825161	0.6727821466	0.1232827036	0.0120985287	4.94E-04	8.46E-04	1
OG0000006	Ephrin_lbd	fn3	0.8478188597	4.49E-02	0.0226978783	0.0041934345	4.21E-04	2.18E-05	3.79E-05	1
OG0000006	Ephrin_lbd	Pkinase_Tyr	8.46E-01	4.46E-02	2.26E-02	4.17E-03	4.18E-04	2.17E-05	3.77E-05	1
OG0000006	fn3	Pkinase_Tyr	7.84E-07	7.63E-04	7.42E-01	2.31E-01	2.33E-02	9.61E-04	1.68E-03	1
OG0000006	Fz	Kringle	9.19E-01	4.75E-02	2.40E-02	4.43E-03	4.44E-04	2.28E-05	3.95E-05	0
OG0000006	Fz	Pkinase_Tyr	9.15E-01	5.11E-02	2.59E-02	4.79E-03	4.79E-04	2.42E-05	4.19E-05	0
OG0000006	GF_recep_IV	Pkinase_Tyr	1.92E-02	5.93E-01	2.98E-01	5.45E-02	5.36E-03	2.21E-04	3.79E-04	1
OG0000006	Ig_2	Ig_3	0.8547873652	0.0416773296	0.0209831096	0.0038758033	3.90E-04	2.06E-05	3.57E-05	1
OG0000006	Ig_2	Pkinase_Tyr	9.22E-01	4.63E-02	2.34E-02	4.31E-03	4.33E-04	2.23E-05	3.87E-05	0
OG0000006	Ig_3	Pkinase_Tyr	1.45E-01	5.28E-01	2.72E-01	4.99E-02	4.91E-03	2.03E-04	3.49E-04	1
OG0000006	ig	Pkinase_Tyr	9.11E-01	5.50E-02	2.80E-02	5.18E-03	5.17E-04	2.57E-05	4.46E-05	0
OG0000006	I-set	Fz	9.21E-01	4.56E-02	2.30E-02	4.24E-03	4.25E-04	2.20E-05	3.82E-05	0
OG0000006	I-set	Ig_3	1.69E-01	4.97E-01	2.50E-01	4.57E-02	4.49E-03	1.86E-04	3.20E-04	1
OG0000006	I-set	Kringle	0.9210654786	0.0456120842	0.022978187	0.0042416539	4.25E-04	2.20E-05	3.82E-05	0
OG0000006	I-set	Pkinase_Tyr	0.0289894777	5.45E-01	0.3520117036	0.067026915	6.60E-03	2.72E-04	4.67E-04	1
OG0000006	Kringle	Pkinase_Tyr	9.02E-01	5.95E-02	3.05E-02	5.63E-03	5.61E-04	2.75E-05	4.76E-05	0
OG0000006	LRR_8	Pkinase_Tyr	3.75E-06	2.84E-05	7.58E-02	5.29E-01	5.41E-02	2.24E-03	2.67E-01	1
OG0000006	PH	Pkinase_Tyr	2.83E-04	0.0085737935	0.8234479911	0.1509971467	1.48E-02	6.03E-04	1.03E-03	1
OG0000006	PH	SH2	0.0196732364	6.08E-01	3.05E-01	5.59E-02	5.49E-03	2.26E-04	3.88E-04	1
OG0000006	PH	SH3_1	0.0196732364	6.08E-01	3.05E-01	5.59E-02	5.49E-03	2.26E-04	3.88E-04	1
OG0000006	Pkinase_Tyr	Focal_AT	0.1518016376	0.0072873734	7.02E-01	1.29E-01	1.26E-02	5.15E-04	8.83E-04	1
OG0000006	Pkinase_Tyr	SAM_1	8.99E-01	6.14E-02	3.15E-02	5.81E-03	5.80E-04	2.82E-05	1.65E-03	1
OG0000006	Recep_L_domain	GF_recep_IV	0.0191796438	0.5933344049	2.98E-01	5.45E-02	5.36E-03	2.21E-04	3.79E-04	1
OG0000006	Recep_L_domain	Pkinase_Tyr	9.77E-05	7.34E-03	8.19E-01	1.56E-01	1.54E-02	6.27E-04	1.08E-03	1
OG0000006	SH2	Ank_2	1.67E-01	4.90E-01	2.46E-01	4.50E-02	4.43E-03	1.84E-04	3.15E-04	1
OG0000006	SH2	Pkinase_Tyr	0.00E+00	1.15E-13	7.67E-08	7.28E-01	2.03E-01	1.40E-02	4.16E-02	1
OG0000006	SH3_1	Pkinase_Tyr	1.41E-11	1.91E-09	5.03E-05	8.75E-01	1.08E-01	4.93E-03	9.77E-03	1
OG0000006	SH3_1	SH2	1.33E-11	1.87E-09	5.02E-05	8.74E-01	1.08E-01	4.93E-03	9.78E-03	1
OG0000006	Sushi	Pkinase_Tyr	4.07E-04	1.08E-03	7.93E-01	1.59E-01	1.57E-02	6.41E-04	1.10E-03	1
OG0000008	PPR_2	PPR	2.79E-03	2.86E-05	4.49E-12	2.30E-12	5.04E-15	7.11E-14	4.21E-11	1
OG0000008	PPR_2	PPR_3	5.95E-05	5.47E-05	2.76E-09	3.24E-10	3.93E-12	1.17E-11	2.32E-08	1
OG0000008	PPR_3	PPR	1.23E-06	3.64E-06	1.30E-13	5.21E-15	0.00E+00	4.03E-14	4.97E-10	1
OG0000008	PPR	PPR_2	6.86E-05	1.79E-05	1.13E-12	2.23E-13	0.00E+00	4.44E-15	2.33E-11	1
OG0000008	PPR	PPR_3	9.09E-06	2.01E-05	2.79E-10	1.49E-11	1.49E-13	6.73E-13	2.94E-09	1
OG0000009	Filamin	NHL	7.50E-01	1.50E-01	8.36E-02	1.56E-02	1.54E-03	6.72E-05	1.16E-04	1
OG0000009	zf-B_box	Filamin	7.42E-01	1.54E-01	8.62E-02	1.61E-02	1.59E-03	6.92E-05	1.19E-04	1
OG0000009	zf-B_box	NHL	4.87E-02	2.91E-02	1.95E-02	4.01E-01	3.96E-02	1.61E-03	3.64E-01	1
OG0000009	zf-B_box	SGL	8.62E-01	4.22E-02	2.13E-02	3.93E-03	3.94E-04	2.08E-05	3.60E-05	1
OG0000009	zf-C3HC4_3	NHL	8.59E-01	4.26E-02	2.15E-02	3.96E-03	3.98E-04	2.09E-05	3.63E-05	1
OG0000009	zf-C3HC4_3	zf-B_box	0.8871699544	4.89E-02	2.48E-02	4.58E-03	4.59E-04	2.34E-05	4.05E-05	1
OG0000009	zf-C3HC4_4	zf-B_box	9.16E-01	4.64E-02	2.34E-02	4.33E-03	4.34E-04	2.24E-05	3.88E-05	0
OG0000009	zf-C3HC4	Filamin	0.8427489	9.58E-02	5.08E-02	9.42E-03	9.34E-04	4.26E-05	7.34E-05	1
OG0000009	zf-C3HC4	NHL	7.60E-01	1.44E-01	7.96E-02	1.49E-02	1.47E-03	6.41E-05	1.10E-04	1
OG0000009	zf-C3HC4	zf-B_box	4.94E-01	2.20E-01	1.39E-01	2.65E-02	2.60E-03	1.09E-04	3.67E-03	1
OG0000009	zf-RING_5	zf-B_box	8.84E-01	4.32E-02	2.17E-02	4.02E-03	4.03E-04	2.11E-05	1.24E-03	1
OG0000009	zf-RING_UBOX	NHL	8.20E-01	1.09E-01	5.85E-02	1.09E-02	1.08E-03	4.83E-05	8.32E-05	1
OG0000009	zf-RING_UBOX	zf-B_box	6.11E-01	2.24E-01	1.36E-01	2.58E-02	2.55E-03	1.08E-04	1.86E-04	1
OG0000010	DUF3694	CAP_GLY	9.04E-01	4.41E-02	2.22E-02	4.10E-03	4.11E-04	2.14E-05	3.72E-05	0
OG0000010	DUF3694	PH	1.44E-02	4.95E-04	4.82E-02	8.74E-03	8.00E-01	3.23E-02	5.54E-02	1
OG0000010	FHA	CAP_GLY	8.78E-01	4.28E-02	2.15E-02	3.98E-03	3.99E-04	2.10E-05	3.64E-05	1
OG0000010	FHA	DUF3694	7.63E-05	2.48E-03	1.08E-03	1.52E-02	8.70E-01	3.52E-02	6.04E-02	1
OG0000010	FHA	KIF1B	3.25E-01	2.69E-02	1.38E-02	1.97E-01	3.36E-01	1.36E-02	2.33E-02	1
OG0000010	KIF1B	CAP_GLY	9.04E-01	4.41E-02	2.22E-02	4.10E-03	4.11E-04	2.14E-05	3.72E-05	0
OG0000010	KIF1B	DUF3694	1.03E-02	3.88E-04	7.69E-02	1.44E-02	7.99E-01	3.24E-02	5.57E-02	1
OG0000010	Kinesin_assoc	CAP_GLY	9.04E-01	4.41E-02	2.22E-02	4.10E-03	4.11E-04	2.14E-05	3.72E-05	0
OG0000010	Kinesin_assoc	DUF3694	3.68E-06	8.62E-07	3.65E-05	4.98E-04	8.78E-01	3.70E-02	6.67E-02	1
OG0000010	Kinesin_assoc	FHA	2.51E-07	1.49E-07	2.43E-06	3.64E-06	1.59E-04	1.42E-03	2.65E-02	1
OG0000010	Kinesin_assoc	KIF1B	7.52E-03	3.35E-04	6.82E-02	1.30E-02	7.22E-01	2.93E-02	5.05E-02	1
OG0000010	Kinesin_assoc	PH	5.26E-03	3.90E-05	3.61E-03	5.65E-04	5.16E-02	2.09E-03	7.43E-01	1
OG0000010	Kinesin	CAP_GLY	9.04E-01	4.41E-02	2.22E-02	4.10E-03	4.11E-04	2.14E-05	3.72E-05	0
OG0000010	Kinesin	DUF3694	3.68E-06	8.62E-07	3.65E-05	4.98E-04	8.78E-01	3.70E-02	6.67E-02	1
OG0000010	Kinesin	FHA	4.00E-10	4.53E-09	1.01E-07	6.91E-08	1.94E-08	1.20E-06	2.72E-05	1
OG0000010	Kinesin	KIF1B	3.21E-05	8.30E-07	6.03E-05	9.33E-04	0.0526382905	0.0021861111	0.0038591149	1
OG0000010	Kinesin	Kinesin_assoc	1.27E-10	3.05E-10	2.68E-10	1.16E-09	5.69E-09	9.84E-07	1.27E-03	1
OG0000010	Kinesin	Kinesin-relat_1	1.95E-01	9.34E-03	4.56E-03	6.52E-02	6.32E-03	2.16E-02	3.71E-02	1
OG0000010	Kinesin	Microtub_bind	2.21E-04	4.28E-04	0.0408614657	7.40E-03	2.83E-01	1.14E-02	1.96E-02	1
OG0000010	Kinesin	MKLP1_Arf_bdg	0.017048579	6.14E-04	0.0589304542	0.8354721469	0.0819547719	3.32E-03	0.005684046	1
OG0000010	Kinesin	PH	0.0046933566	7.78E-06	5.55E-04	4.51E-06	2.94E-04	1.16E-05	0.0316992964	1
OG0000010	Kinesin	WD40	1.99E-05	3.94E-04	1.91E-06	0.005309045	4.03E-04	0.0013719254	0.4901994769	1
OG0000012	Homeobox	OAR	8.46E-01	4.97E-02	2.53E-02	4.68E-03	4.68E-04	2.38E-05	4.12E-05	1
OG0000013	PA	zf-RING_2	7.22E-04	4.94E-09	2.52E-11	4.52E-08	2.96E-04	1.15E-04	4.35E-04	1
OG0000013	zinc_ribbon_9	zf-RING_2	7.64E-05	2.03E-06	3.51E-08	2.10E-06	6.39E-05	2.31E-06	8.03E-04	1
OG0000014	Sushi	Trypsin	0.9230924686	0.0454782368	0.0229030573	4.23E-03	4.24E-04	2.20E-05	3.81E-05	0
OG0000015	LRR_1	LRR_8	0.0028469299	1.60E-04	1.63E-08	3.95E-05	3.81E-08	1.98E-07	6.19E-04	1
OG0000015	LRR_4	LRR_8	2.86E-04	6.17E-04	1.14E-04	7.83E-05	8.33E-06	2.81E-05	1.78E-03	1
OG0000015	LRR_8	LRR_1	1.09E-02	4.09E-04	1.56E-05	3.46E-04	1.30E-06	4.17E-06	6.92E-04	1
OG0000015	LRR_8	Roc	0.1268836497	6.00E-03	5.77E-01	1.06E-01	1.04E-02	4.22E-04	4.80E-02	1
OG0000015	LRR_8	zf-C3HC4_3	0.8468208359	0.0412668701	0.0207647983	0.0321383568	3.16E-03	1.32E-04	7.68E-03	1
OG0000016	DUF1758	Peptidase_A17	0.904213221	4.75E-02	2.40E-02	4.44E-03	4.45E-04	2.28E-05	3.95E-05	0
OG0000016	DUF1759	DUF1758	0.9049718168	5.43E-02	2.77E-02	5.12E-03	5.11E-04	2.55E-05	4.41E-05	0
OG0000016	DUF1759	Peptidase_A17	9.00E-01	5.53E-02	2.82E-02	5.21E-03	5.21E-04	2.59E-05	4.48E-05	1
OG0000016	Peptidase_A17	rve	0.8961878527	0.0505297951	0.0256633214	4.74E-03	4.74E-04	2.40E-05	4.16E-05	1
OG0000017	TPR_10	TPR_1	0.002007651	0.0218103583	0.0108626033	0.0019030434	1.96E-03	7.94E-05	1.16E-04	1
OG0000017	TPR_10	TPR_12	1.54E-05	0.0013267598	6.84E-04	3.72E-05	1.14E-07	1.33E-07	2.42E-06	1
OG0000017	TPR_11	CHAT	0.8392778126	0.0411528046	0.0207284846	0.0038294515	3.85E-04	2.04E-05	3.54E-05	1
OG0000017	TPR_11	TPR_1	1.91E-02	6.10E-01	3.08E-01	5.64E-02	5.54E-03	2.29E-04	3.92E-04	1
OG0000017	TPR_11	TPR_12	3.42E-04	1.47E-02	7.51E-03	1.29E-03	1.08E-05	3.74E-05	2.15E-03	1
OG0000017	TPR_12	CHAT	0.8582733736	0.0869252423	0.0455311741	0.0084263091	8.36E-04	3.86E-05	6.66E-05	1
OG0000017	TPR_12	GoLoco	0.1733836909	0.5094691379	0.2555701713	0.0468153886	0.0045999908	1.91E-04	3.27E-04	1
OG0000017	TPR_12	TPR_1	1.78E-08	5.30E-04	0.0010191688	1.45E-04	4.77E-05	1.70E-06	1.97E-06	1
OG0000017	TPR_12	TPR_10	1.11E-08	3.15E-04	5.37E-04	3.78E-05	1.03E-05	1.75E-07	8.68E-07	1
OG0000017	TPR_12	TPR_11	0.2898102338	0.4334171726	0.2183145703	0.0400228719	3.93E-03	1.64E-04	2.81E-04	1
OG0000017	TPR_12	TPR_2	1.83E-02	1.08E-01	5.50E-02	1.00E-02	1.62E-02	6.55E-04	1.11E-03	1
OG0000017	TPR_12	TPR_7	0.00202997	0.3678940223	0.3089208131	0.0605558831	0.0059404769	2.44E-04	4.14E-04	1
OG0000017	TPR_12	TPR_8	0.0013363095	0.0128294742	0.0070801289	0.0012268852	4.56E-06	1.56E-05	5.75E-06	1
OG0000017	TPR_1	CHAT	0.9048338796	0.0453589791	0.0228703023	0.0042224853	4.24E-04	2.19E-05	3.81E-05	0
OG0000017	TPR_1	GoLoco	0.1736460759	5.09E-01	2.55E-01	4.68E-02	4.60E-03	1.91E-04	3.27E-04	1
OG0000017	TPR_1	TPR_10	2.66E-04	0.0059411828	0.0029310148	4.45E-04	3.66E-04	1.46E-05	8.23E-04	1
OG0000017	TPR_1	TPR_11	8.76E-01	4.28E-02	2.16E-02	3.98E-03	4.00E-04	2.10E-05	1.23E-03	1
OG0000017	TPR_1	TPR_12	2.06E-08	7.39E-05	5.84E-06	8.71E-05	7.25E-08	2.63E-08	3.63E-06	1
OG0000017	TPR_1	TPR_7	2.80E-01	4.36E-01	2.21E-01	0.0404809769	0.0039769541	1.65E-04	2.84E-04	1
OG0000017	TPR_1	TPR_8	9.10E-01	5.21E-02	2.65E-02	4.89E-03	4.88E-04	2.07E-03	3.55E-03	0
OG0000017	TPR_2	CHAT	8.84E-01	4.32E-02	2.18E-02	4.02E-03	4.03E-04	2.11E-05	3.67E-05	1
OG0000017	TPR_2	TPR_12	1.75E-03	1.31E-02	6.87E-03	1.18E-03	2.50E-06	1.73E-05	9.32E-06	1
OG0000017	TPR_7	CHAT	8.86E-01	4.44E-02	0.0223626042	0.0041294926	4.14E-04	2.16E-05	3.74E-05	1
OG0000017	TPR_7	TPR_12	1.49E-03	3.67E-01	3.38E-01	0.0672489109	0.0066105034	2.72E-04	4.63E-04	1
OG0000017	TPR_8	CHAT	9.23E-01	4.75E-02	2.40E-02	0.0044245364	4.43E-04	2.27E-05	3.94E-05	0
OG0000017	TPR_8	TPR_11	0.8838086533	0.0430777472	0.0216839457	0.0040040377	4.02E-04	2.11E-05	3.66E-05	1
OG0000017	TPR_8	TPR_12	0.0016615711	0.044820568	0.0297642143	0.0055977439	4.42E-04	1.79E-05	1.11E-05	1
OG0000017	TPR_8	TPR_7	0.9256829224	4.54E-02	2.29E-02	4.22E-03	4.24E-04	2.19E-05	3.81E-05	0
OG0000018	DSL	EGF	0.8895446097	6.60E-02	3.40E-02	6.29E-03	6.27E-04	3.01E-05	5.21E-05	1
OG0000018	DSL	hEGF	0.8725997215	4.50E-02	0.0227536895	0.0042024688	4.22E-04	2.19E-05	3.79E-05	1
OG0000018	EGF	Ank_2	9.26E-01	4.59E-02	2.31E-02	4.27E-03	4.28E-04	2.21E-05	3.84E-05	0
OG0000018	EGF_CA	Ank_2	0.9177342168	4.48E-02	2.26E-02	4.17E-03	4.18E-04	2.17E-05	3.77E-05	0
OG0000018	EGF_CA	EGF	1.82E-04	4.60E-02	3.25E-02	8.29E-01	8.21E-02	3.34E-03	5.77E-03	1
OG0000018	EGF_CA	hEGF	4.40E-01	4.09E-02	2.12E-02	4.51E-01	4.43E-02	1.80E-03	3.08E-03	1
OG0000018	EGF_CA	Laminin_G_1	8.52E-01	4.15E-02	2.09E-02	3.86E-03	3.88E-04	2.05E-05	3.56E-05	1
OG0000018	EGF_CA	Laminin_G_2	9.24E-01	4.51E-02	2.27E-02	4.19E-03	4.21E-04	2.18E-05	3.79E-05	0
OG0000018	EGF	EGF_CA	7.28E-03	1.89E-01	1.33E-01	6.04E-01	5.97E-02	2.43E-03	4.18E-03	1
OG0000018	EGF	hEGF	9.79E-04	2.25E-02	1.52E-02	6.84E-01	6.81E-02	2.78E-03	1.63E-01	1
OG0000018	EGF	Laminin_G_1	9.25E-01	4.57E-02	2.30E-02	4.24E-03	4.26E-04	2.20E-05	3.82E-05	0
OG0000018	EGF	Laminin_G_2	8.91E-01	6.73E-02	3.47E-02	6.41E-03	6.38E-04	3.06E-05	5.29E-05	1
OG0000018	EGF	Notch	0.9228543875	4.55E-02	2.29E-02	4.23E-03	4.24E-04	2.20E-05	3.81E-05	0
OG0000018	hEGF	Ank_2	0.9176459063	0.0447365171	0.0225150114	0.0041561404	4.17E-04	2.17E-05	3.76E-05	0
OG0000018	hEGF	EGF	5.65E-04	0.0172548965	0.0124992502	0.5688438145	5.68E-02	2.32E-03	2.70E-01	1
OG0000018	hEGF	EGF_CA	0.7848938464	0.0884103048	0.0466676597	0.0724934054	7.13E-03	2.93E-04	5.03E-04	1
OG0000018	hEGF	Laminin_G_2	9.25E-01	4.53E-02	2.28E-02	4.21E-03	4.22E-04	2.19E-05	3.79E-05	0
OG0000018	Laminin_G_1	EGF	8.76E-01	4.26E-02	2.15E-02	3.96E-03	3.98E-04	2.09E-05	3.63E-05	1
OG0000018	Laminin_G_2	EGF	0.9145348878	0.053059549	0.0269810657	0.0049825086	4.98E-04	2.50E-05	4.32E-05	0
OG0000018	Laminin_G_2	EGF_CA	9.23E-01	4.51E-02	2.27E-02	4.19E-03	4.20E-04	2.18E-05	3.78E-05	0
OG0000018	Notch	Ank_2	9.23E-01	4.54E-02	2.29E-02	4.22E-03	4.23E-04	2.19E-05	3.80E-05	0
OG0000019	BACK	Kelch_1	2.61E-01	3.49E-01	2.95E-01	5.91E-02	5.84E-03	2.41E-04	4.15E-04	1
OG0000019	BACK	Kelch_6	8.88E-01	4.94E-02	2.51E-02	4.63E-03	4.64E-04	2.36E-05	4.08E-05	1
OG0000019	BTB	BACK	4.33E-03	6.96E-03	6.12E-03	1.15E-03	6.23E-06	8.73E-09	9.45E-07	1
OG0000019	BTB	Kelch_1	2.89E-01	3.54E-01	2.91E-01	5.81E-02	5.74E-03	2.37E-04	4.09E-04	1
OG0000019	BTB	Kelch_6	9.11E-01	5.49E-02	2.80E-02	5.17E-03	5.17E-04	2.57E-05	4.45E-05	0
OG0000019	Kelch_1	Kelch_6	7.72E-02	1.63E-01	8.52E-02	4.10E-01	4.02E-02	1.63E-03	2.79E-03	1
OG0000019	Kelch_6	Kelch_1	5.76E-05	4.36E-05	4.21E-03	2.03E-02	1.88E-03	7.61E-05	9.75E-04	1
OG0000021	EF-hand_6	EF-hand_7	2.07E-05	5.09E-04	6.51E-05	0.0014008847	1.85E-05	4.77E-07	6.58E-06	1
OG0000021	EF-hand_7	EF-hand_8	4.03E-05	2.93E-04	3.36E-08	3.36E-05	2.20E-07	5.19E-07	4.24E-04	1
OG0000021	EF-hand_8	EF-hand_7	2.79E-04	0.0137774176	0.007675297	0.0013404395	1.90E-05	1.33E-04	2.13E-04	1
OG0000023	AC_N	DUF1053	8.89E-01	4.91E-02	2.49E-02	4.60E-03	4.61E-04	2.34E-05	4.06E-05	1
OG0000023	AC_N	Guanylate_cyc	0.5618984098	0.045278571	0.0234103562	3.35E-01	3.29E-02	1.33E-03	2.29E-03	1
OG0000023	ANF_receptor	Guanylate_cyc	4.56E-04	0.0056032198	0.0031912713	8.85E-01	9.29E-02	3.90E-03	6.99E-03	1
OG0000023	ANF_receptor	Pkinase_Tyr	0.0013619844	6.97E-03	3.56E-03	8.87E-01	8.97E-02	3.69E-03	6.46E-03	1
OG0000023	DUF1053	Guanylate_cyc	0.8901443695	0.0502055478	0.0254951384	4.71E-03	4.71E-04	2.39E-05	4.14E-05	1
OG0000023	Guanylate_cyc	DUF1053	0.8896090925	0.0495470556	0.0251421963	0.0046435632	4.65E-04	2.36E-05	4.09E-05	1
OG0000023	HNOBA	Guanylate_cyc	1.05E-11	7.81E-06	0.0069605488	8.12E-01	9.84E-02	4.44E-03	8.70E-03	1
OG0000023	HNOB	Guanylate_cyc	2.82E-05	0.3085151572	0.5509659205	0.1219559998	1.21E-02	4.97E-04	8.60E-04	1
OG0000023	HNOB	HNOBA	2.03E-05	0.2217244418	0.3959257508	0.0876115649	8.67E-03	3.56E-04	4.10E-02	1
OG0000023	Pkinase_Tyr	Guanylate_cyc	0	2.01E-12	2.76E-08	6.41E-01	2.33E-01	2.08E-02	7.93E-02	1
OG0000023	Pkinase_Tyr	HNOBA	0.0053040389	2.09E-04	2.07E-02	8.79E-01	8.66E-02	3.51E-03	6.04E-03	1
OG0000024	cNMP_binding	CLZ	0.8802181445	4.31E-02	2.17E-02	0.0040118132	4.03E-04	2.11E-05	3.66E-05	1
OG0000024	cNMP_binding	Ion_trans	0.0041337581	1.19E-02	5.78E-03	0.1623131766	1.58E-02	6.40E-04	1.08E-03	1
OG0000024	Ion_trans	CLZ	0.8802181445	0.0431430371	0.0217250143	0.0040118132	4.03E-04	2.11E-05	3.66E-05	1
OG0000024	Ion_trans	cNMP_binding	5.64E-10	3.15E-07	1.99E-11	3.14E-08	8.66E-10	1.09E-06	1.20E-07	1
OG0000024	Ion_trans_N	cNMP_binding	1.03E-02	3.06E-02	1.52E-02	8.47E-01	8.32E-02	3.37E-03	5.78E-03	1
OG0000024	Ion_trans_N	Ion_trans	0.0103404264	0.0306024077	0.0151954473	8.47E-01	8.31E-02	3.37E-03	5.77E-03	1
OG0000025	ABC_membrane	ABC_tran	0.00E+00	0.00E+00	0	0	0	0.00E+00	8.07E-12	1
OG0000025	ABC_tran	ABC_membrane	0	0	0	0	0.00E+00	0.00E+00	2.27E-11	1
OG0000026	Ank_2	BTB	0.0020842922	5.98E-03	2.82E-03	1.07E-02	8.40E-01	3.40E-02	5.82E-02	1
OG0000026	Ank_2	RCC1	2.11E-04	4.05E-04	8.38E-06	8.26E-04	7.80E-04	2.65E-03	4.55E-03	1
OG0000026	Ank_4	BTB	0.0148475095	5.15E-04	0.050002584	0.0090756281	7.99E-01	3.23E-02	5.53E-02	1
OG0000026	Ank_4	RCC1	1.61E-04	1.02E-05	7.85E-04	4.65E-05	1.88E-03	6.39E-03	1.10E-02	1
OG0000026	RCC1_2	RCC1	5.16E-06	1.20E-06	1.40E-08	6.55E-07	6.37E-09	1.01E-09	2.94E-08	1
OG0000026	RCC1	BTB	2.75E-05	4.32E-07	3.20E-08	5.69E-07	3.38E-08	6.84E-09	3.33E-05	1
OG0000026	RCC1	FYVE	5.61E-03	7.42E-05	7.44E-03	1.27E-03	9.67E-06	3.36E-05	1.93E-03	1
OG0000026	RCC1	RCC1_2	2.69E-05	5.77E-08	9.50E-10	8.20E-08	2.72E-09	2.40E-10	3.27E-08	1
OG0000027	Sugar_tr	MFS_1	0.0193922645	7.64E-04	1.93E-04	0.5496091193	0.1234737056	4.99E-03	8.55E-03	1
OG0000028	LRR_1	LRR_8	9.89E-07	7.92E-07	1.77E-04	2.18E-01	2.23E-02	9.27E-04	1.63E-03	1
OG0000028	LRR_5	LRR_8	3.74E-07	1.39E-06	1.95E-02	8.74E-01	9.34E-02	3.95E-03	7.18E-03	1
OG0000028	LRR_8	I-set	0.8410409941	0.0971349601	0.0513962443	0.0095234374	9.44E-04	4.30E-05	7.41E-05	1
OG0000028	LRR_8	LRR_1	2.56E-06	4.23E-08	7.69E-06	6.70E-03	5.99E-04	2.49E-05	2.42E-05	1
OG0000028	LRR_8	LRR_5	1.96E-07	1.02E-06	2.38E-02	8.47E-01	9.13E-02	3.89E-03	7.11E-03	1
OG0000028	LRRNT	LRR_8	1.15E-02	3.95E-04	7.80E-01	1.70E-01	1.69E-02	6.91E-04	1.19E-03	1
OG0000029	cEGF	EGF	8.79E-01	4.28E-02	2.16E-02	3.98E-03	4.00E-04	2.10E-05	3.64E-05	1
OG0000029	cEGF	EGF_CA	0.0101423223	2.15E-01	1.44E-01	2.76E-02	2.64E-03	1.09E-04	6.80E-02	1
OG0000029	cEGF	FXa_inhibition	0.7314671249	1.21E-01	6.59E-02	1.23E-02	1.20E-03	5.31E-05	1.90E-02	1
OG0000029	CUB	EGF_CA	9.19E-01	4.59E-02	2.31E-02	4.27E-03	4.28E-04	2.21E-05	3.84E-05	0
OG0000029	CUB	FXa_inhibition	0.9189171346	0.0455592992	0.0229535604	0.0042372022	4.25E-04	2.20E-05	3.82E-05	0
OG0000029	EGF_3	EGF_CA	2.32E-09	1.33E-07	6.92E-04	0.3331730786	4.38E-02	2.05E-03	1.46E-01	1
OG0000029	EGF_CA	7tm_2	1.83E-02	5.67E-01	2.84E-01	5.21E-02	5.12E-03	2.12E-04	3.63E-04	1
OG0000029	EGF_CA	cEGF	0.0010547361	2.49E-01	2.92E-01	6.07E-02	5.96E-03	2.45E-04	9.90E-02	1
OG0000029	EGF_CA	CUB	0.914262594	0.0447446468	0.0225251017	0.0041581701	4.17E-04	2.17E-05	3.76E-05	0
OG0000029	EGF_CA	EGF	0.2207632624	0.3221330761	0.1617068897	0.2483580408	0.024364522	9.89E-04	1.29E-02	1
OG0000029	EGF_CA	EGF_3	6.21E-10	1.81E-09	2.21E-05	9.29E-03	1.07E-03	4.85E-05	3.34E-03	1
OG0000029	EGF_CA	FXa_inhibition	8.82E-04	1.64E-04	6.37E-01	2.47E-01	2.54E-02	1.05E-03	7.01E-02	1
OG0000029	EGF_CA	Sushi	0.9126005193	4.49E-02	2.26E-02	4.17E-03	4.18E-04	2.17E-05	3.77E-05	0
OG0000029	EGF	EGF_CA	0.0102683982	0.5717992001	0.3456084655	0.0651208205	6.41E-03	2.64E-04	4.53E-04	1
OG0000029	FXa_inhibition	cEGF	0.0551343353	0.4989114932	0.2855072324	5.34E-02	5.24E-03	2.16E-04	8.22E-02	1
OG0000029	FXa_inhibition	CUB	0.9141465927	0.0446576252	0.0224786905	0.0041495906	4.16E-04	2.17E-05	3.76E-05	0
OG0000029	FXa_inhibition	EGF_CA	1.98E-06	2.36E-05	2.10E-01	9.73E-02	1.00E-02	4.19E-04	1.68E-01	1
OG0000029	hEGF	EGF_CA	2.68E-01	4.51E-01	2.31E-01	4.24E-02	4.17E-03	1.73E-04	2.97E-04	1
OG0000029	NIDO	EGF_CA	0.8791688023	0.0431154221	0.0217120155	4.01E-03	4.03E-04	2.11E-05	3.66E-05	1
OG0000029	SRCR	EGF_CA	0.9202261474	0.046056455	0.023217825	0.0042860289	4.30E-04	2.22E-05	3.85E-05	0
OG0000029	VWD	cEGF	0.8591568329	0.0420824346	0.0211926751	3.91E-03	3.93E-04	2.07E-05	3.60E-05	1
OG0000029	VWD	EGF_CA	0.9028895269	0.0443005322	0.0223065257	0.004118287	4.13E-04	2.15E-05	3.73E-05	0
OG0000030	SRCR	I-set	0.9264973793	0.0453907475	0.0228504078	0.0042177547	4.23E-04	2.19E-05	3.80E-05	0
OG0000030	SRCR	Ldl_recept_a	0.8760087568	0.0427427783	0.0215177745	0.0039736812	3.99E-04	2.10E-05	3.64E-05	1
OG0000030	SRCR	Lysyl_oxidase	0.9130105439	0.0521393201	0.0264889668	0.0048914987	4.89E-04	2.46E-05	4.26E-05	0
OG0000031	AAA_5	AAA_7	0.00E+00	0.00E+00	0.00E+00	0.00E+00	0.00E+00	4.59E-12	3.29E-09	1
OG0000031	AAA_5	AAA_8	0	0.00E+00	0.00E+00	0.00E+00	0.00E+00	4.80E-12	3.35E-09	1
OG0000031	AAA_5	AAA_9	0.00E+00	0.00E+00	0	0	0	5.42E-12	3.64E-09	1
OG0000031	AAA_5	Dynein_heavy	0.00E+00	0.00E+00	0.00E+00	0.00E+00	0.00E+00	6.02E-12	3.80E-09	1
OG0000031	AAA_5	MT	0.00E+00	0.00E+00	0.00E+00	0.00E+00	0.00E+00	5.42E-12	3.64E-09	1
OG0000031	AAA_6	AAA_5	0.00E+00	0.00E+00	0.00E+00	0.00E+00	0.00E+00	5.14E-12	3.44E-09	1
OG0000031	AAA_6	AAA_7	0.00E+00	0.00E+00	0	0	0.00E+00	1.56E-13	1.67E-10	1
OG0000031	AAA_6	AAA_8	0.00E+00	0.00E+00	0	0	0.00E+00	2.27E-13	1.99E-10	1
OG0000031	AAA_6	AAA_9	0.00E+00	0.00E+00	0.00E+00	0.00E+00	0.00E+00	2.58E-13	2.16E-10	1
OG0000031	AAA_6	Dynein_heavy	0	0.00E+00	0.00E+00	0.00E+00	0.00E+00	2.15E-13	2.00E-10	1
OG0000031	AAA_6	MT	0	0	0	0.00E+00	0.00E+00	2.45E-13	2.01E-10	1
OG0000031	AAA_7	AAA_8	0	0	0	0	0.00E+00	1.62E-13	1.67E-10	1
OG0000031	AAA_7	AAA_9	0.00E+00	0	0	0	0	1.85E-13	1.86E-10	1
OG0000031	AAA_7	Dynein_heavy	0	0	0	0	0	1.77E-13	1.90E-10	1
OG0000031	AAA_7	MT	0	0	0	0	0	1.77E-13	1.73E-10	1
OG0000031	AAA_8	AAA_9	0	0.00E+00	0.00E+00	0.00E+00	0.00E+00	2.12E-13	1.96E-10	1
OG0000031	AAA_8	Dynein_heavy	0	0	0	0	0	2.23E-13	2.08E-10	1
OG0000031	AAA_8	MT	0	0.00E+00	0.00E+00	0.00E+00	0.00E+00	1.91E-13	1.82E-10	1
OG0000031	AAA_9	Dynein_heavy	0.00E+00	0.00E+00	0.00E+00	0.00E+00	0.00E+00	1.58E-13	1.71E-10	1
OG0000031	DHC_N1	AAA_5	1.15E-13	4.00E-12	1.28E-14	3.95E-14	3.22E-14	1.22E-10	7.38E-08	1
OG0000031	DHC_N1	AAA_6	1.57E-15	9.29E-14	0.00E+00	0.00E+00	0.00E+00	3.32E-11	2.36E-08	1
OG0000031	DHC_N1	AAA_7	2.93E-14	8.44E-13	1.24E-15	2.48E-15	1.19E-15	5.07E-11	2.76E-08	1
OG0000031	DHC_N1	AAA_8	3.98E-14	1.17E-12	1.95E-15	4.43E-15	2.53E-15	5.73E-11	2.90E-08	1
OG0000031	DHC_N1	AAA_9	4.21E-14	1.21E-12	2.00E-15	4.52E-15	2.58E-15	5.76E-11	2.90E-08	1
OG0000031	DHC_N1	DHC_N2	0	3.06E-14	0	0	0.00E+00	3.02E-11	2.51E-08	1
OG0000031	DHC_N1	Dynein_heavy	4.65E-14	1.06E-12	1.49E-15	2.91E-15	1.37E-15	5.26E-11	2.80E-08	1
OG0000031	DHC_N1	MT	4.21E-14	1.21E-12	2.00E-15	4.52E-15	2.58E-15	5.76E-11	2.90E-08	1
OG0000031	DHC_N2	AAA_5	0.00E+00	0.00E+00	0.00E+00	0.00E+00	0.00E+00	6.86E-12	4.38E-09	1
OG0000031	DHC_N2	AAA_6	0.00E+00	0.00E+00	0.00E+00	0.00E+00	0.00E+00	1.15E-13	1.57E-10	1
OG0000031	DHC_N2	AAA_7	0.00E+00	0.00E+00	0.00E+00	0.00E+00	0.00E+00	2.10E-13	2.05E-10	1
OG0000031	DHC_N2	AAA_8	0	0.00E+00	0.00E+00	0.00E+00	0.00E+00	3.07E-13	2.45E-10	1
OG0000031	DHC_N2	AAA_9	0	0.00E+00	0.00E+00	0	0	3.47E-13	2.66E-10	1
OG0000031	DHC_N2	Dynein_heavy	0	0.00E+00	0.00E+00	0.00E+00	0.00E+00	2.77E-13	2.42E-10	1
OG0000031	DHC_N2	MT	0.00E+00	0.00E+00	0.00E+00	0	0	3.26E-13	2.46E-10	1
OG0000031	MT	AAA_9	0.00E+00	0.00E+00	0.00E+00	0	0	1.85E-13	1.79E-10	1
OG0000031	MT	Dynein_heavy	0.00E+00	0.00E+00	0.00E+00	0.00E+00	0.00E+00	1.81E-13	1.87E-10	1
OG0000033	cNMP_binding	RasGEF	2.87E-04	6.23E-04	5.96E-02	8.45E-01	8.29E-02	3.36E-03	5.75E-03	1
OG0000033	EF-hand_5	C1_1	0.9258025816	0.0455604974	0.0229425292	0.0042348296	4.25E-04	2.20E-05	3.81E-05	0
OG0000033	PDZ	RasGEF	0.1518278589	0.0072238013	0.6954068323	0.1274326723	0.0125055038	5.10E-04	8.74E-04	1
OG0000033	PH	RasGEF	8.13E-06	3.55E-05	6.68E-03	1.14E-03	1.71E-06	1.77E-05	1.06E-03	1
OG0000033	PH	RasGEF_N	6.97E-03	1.24E-04	2.38E-02	4.31E-03	3.15E-04	3.31E-03	2.01E-01	1
OG0000033	RA	RasGEF	4.39E-03	1.31E-06	1.95E-04	9.00E-01	8.87E-02	3.60E-03	6.19E-03	1
OG0000033	RasGEF	C1_1	9.25E-01	4.53E-02	2.28E-02	4.21E-03	4.22E-04	2.19E-05	3.80E-05	0
OG0000033	RasGEF	EF-hand_5	2.11E-02	8.12E-04	2.16E-04	8.92E-01	8.75E-02	3.54E-03	6.07E-03	1
OG0000033	RasGEF_N	RA	4.37E-03	4.50E-06	6.85E-04	8.99E-01	8.84E-02	3.58E-03	6.15E-03	1
OG0000033	RasGEF_N	RasGEF	0.00E+00	0.00E+00	0.00E+00	0.00E+00	0.00E+00	0.00E+00	1.98E-08	1
OG0000033	RasGEF	PH	2.17E-02	8.41E-04	2.33E-04	3.04E-01	2.97E-02	2.04E-01	3.56E-01	1
OG0000033	RasGEF	RA	3.93E-02	1.71E-03	6.71E-04	8.74E-01	8.57E-02	3.47E-03	5.94E-03	1
OG0000033	RhoGEF	PH	1.53E-01	7.27E-03	7.00E-01	1.28E-01	1.26E-02	5.13E-04	8.80E-04	1
OG0000033	RhoGEF	RasGEF	2.74E-04	6.91E-04	6.72E-02	3.23E-01	3.16E-02	1.28E-03	4.56E-01	1
OG0000033	RhoGEF	RasGEF_N	3.01E-04	7.01E-04	6.75E-02	3.23E-01	3.16E-02	1.28E-03	4.56E-01	1
OG0000034	ABC_tran	ABC2_membrane	0.00E+00	0.00E+00	0.00E+00	0.00E+00	0.00E+00	0.00E+00	3.86E-14	1
OG0000036	CH	C1_1	1.67E-01	4.89E-01	2.45E-01	4.49E-02	4.42E-03	1.83E-04	3.14E-04	1
OG0000036	CH	PH	0.0092751473	2.31E-04	2.21E-02	3.13E-01	3.06E-02	1.24E-03	4.97E-01	1
OG0000036	CH	RhoGEF	7.14E-06	2.63E-05	2.36E-03	3.35E-02	3.18E-03	1.28E-04	7.46E-01	1
OG0000036	CH	SH2	2.47E-05	6.18E-04	5.95E-02	8.46E-01	8.30E-02	3.36E-03	5.76E-03	1
OG0000036	CH	SH3_1	2.73E-05	6.24E-04	5.97E-02	8.46E-01	8.30E-02	3.36E-03	5.76E-03	1
OG0000036	FYVE	PH	1.53E-01	7.28E-03	7.01E-01	1.28E-01	1.26E-02	5.14E-04	8.81E-04	1
OG0000036	PH_13	C2	8.91E-01	4.35E-02	2.19E-02	4.05E-03	4.06E-04	2.12E-05	3.69E-05	1
OG0000036	PH	FYVE	1.60E-04	1.07E-05	8.35E-04	5.58E-05	4.50E-03	1.81E-04	1.17E-01	1
OG0000036	PH	SH2	1.70E-02	6.11E-04	5.87E-02	8.32E-01	8.16E-02	3.30E-03	5.66E-03	1
OG0000036	PH	SH3_1	1.62E-02	5.83E-04	5.67E-02	8.04E-01	7.89E-02	3.19E-03	5.47E-03	1
OG0000036	RhoGEF	BAR	6.43E-01	3.13E-02	1.57E-02	2.87E-03	2.43E-01	9.83E-03	1.69E-02	1
OG0000036	RhoGEF	C1_1	2.28E-03	7.01E-02	3.50E-02	8.03E-01	7.88E-02	3.19E-03	5.46E-03	1
OG0000036	RhoGEF	C2	4.60E-01	2.23E-02	1.11E-02	1.59E-01	1.56E-02	6.32E-04	3.66E-02	1
OG0000036	RhoGEF	FYVE	1.48E-04	2.23E-06	2.05E-05	1.52E-06	7.70E-06	4.25E-08	1.50E-05	1
OG0000036	RhoGEF	PH	7.08E-09	4.16E-10	2.03E-12	8.06E-13	5.90E-13	1.41E-09	2.26E-02	1
OG0000036	RhoGEF	PH_13	2.59E-01	1.25E-02	6.13E-03	1.06E-03	2.03E-05	8.11E-07	2.06E-03	1
OG0000036	RhoGEF	SH2	2.26E-05	6.10E-04	0.0593621781	0.84630072	0.0830734656	3.36E-03	5.77E-03	1
OG0000036	RhoGEF	SH3_1	6.76E-06	9.79E-06	7.52E-04	1.06E-02	8.76E-01	3.54E-02	6.08E-02	1
OG0000036	RhoGEF	SH3_2	5.32E-02	1.55E-01	7.81E-02	1.42E-02	1.32E-03	9.27E-03	5.49E-01	1
OG0000036	RhoGEF	SH3_9	0.0058075951	0.0081842858	0.7851436694	1.44E-01	1.41E-02	5.75E-04	3.33E-02	1
OG0000036	SH2	SH3_1	2.79E-04	0.0085369893	0.8190486129	1.50E-01	1.47E-02	6.00E-04	1.03E-03	1
OG0000036	SH3_1	BAR	0.8733937175	0.0425416227	0.0214144726	0.0039546987	3.97E-04	2.09E-05	3.62E-05	1
OG0000036	SH3_1	PH	1.67E-01	4.90E-01	2.46E-01	4.50E-02	4.42E-03	1.83E-04	6.14E-03	1
OG0000036	SH3_1	RhoGEF	4.86E-06	1.28E-05	0.0011026438	1.08E-04	5.70E-05	2.03E-06	0.0029745153	1
OG0000036	SH3_1	SH2	0.0032765333	0.1020844171	0.0510537921	7.23E-01	7.10E-02	2.87E-03	4.92E-03	1
OG0000036	SH3_1	SH3_2	1.73E-01	5.04E-01	2.53E-01	4.64E-02	4.56E-03	1.89E-04	3.25E-04	1
OG0000036	SH3_2	RhoGEF	8.72E-01	4.25E-02	2.14E-02	3.94E-03	5.37E-02	2.17E-03	3.73E-03	1
OG0000036	SH3_2	SH3_9	8.76E-01	4.27E-02	2.15E-02	3.97E-03	3.99E-04	2.09E-05	3.63E-05	1
OG0000036	SH3_9	C2	0.8754218551	0.0426760731	0.0214830438	0.0039672851	3.99E-04	2.09E-05	3.63E-05	1
OG0000036	SH3_9	PH_13	0.8754218551	0.0426760731	0.0214830438	0.0039672851	3.99E-04	2.09E-05	3.63E-05	1
OG0000036	SH3_9	RhoGEF	2.63E-03	1.17E-06	6.49E-05	2.34E-04	6.29E-04	2.18E-03	2.94E-02	1
OG0000036	SH3_9	SH3_1	1.25E-01	5.97E-03	5.75E-01	1.05E-01	1.71E-01	6.90E-03	1.18E-02	1
OG0000037	FHA	Pkinase	0.0040467324	1.50E-06	1.44E-08	6.29E-07	1.48E-05	1.72E-04	0.221814032	1
OG0000037	fn3	Pkinase	0.8373149126	0.0408189241	0.0205529788	0.0037970811	3.82E-04	2.03E-05	3.52E-05	1
OG0000037	I-set	fn3	8.37E-01	4.08E-02	2.05E-02	3.79E-03	3.82E-04	2.02E-05	3.51E-05	1
OG0000037	I-set	Pkinase	0.8441910209	0.0411585936	0.0207232447	0.0038282449	3.85E-04	2.04E-05	3.54E-05	1
OG0000037	Pkinase	CaMKII_AD	2.61E-04	0.0084725012	0.8230941627	1.51E-01	1.49E-02	6.05E-04	1.04E-03	1
OG0000037	Pkinase	I-set	0.8440846714	0.0411265969	0.0207062884	0.0038251135	3.85E-04	2.04E-05	3.54E-05	1
OG0000038	BAR	RhoGAP	7.28E-06	4.11E-06	1.99E-04	0.9001336439	0.0883509732	3.58E-03	6.13E-03	0
OG0000038	C1_1	RhoGAP	0.0042776398	2.05E-06	3.47E-06	0.0155737375	8.73E-01	3.53E-02	6.06E-02	1
OG0000038	C2	RhoGAP	4.73E-04	1.60E-02	0.0079102682	0.001356227	1.69E-05	4.27E-07	0.0010831957	1
OG0000038	CRAL_TRIO_2	RhoGAP	7.19E-06	2.02E-06	2.38E-08	1.30E-06	7.02E-07	2.12E-06	5.51E-03	1
OG0000038	FCH	RhoGAP	7.53E-05	2.76E-06	3.41E-04	0.0096199653	0.8767547468	0.0356044432	0.0614140924	1
OG0000038	PDZ	RhoGAP	0.8449500118	0.0413598863	0.0208297669	0.0038479126	3.87E-04	2.05E-05	3.55E-05	1
OG0000038	PH_9	RhoGAP	2.31E-04	1.21E-04	0.0232616213	0.3336233623	0.5685480554	0.0230207109	0.0395552953	1
OG0000038	PH	RhoGAP	2.90E-06	1.96E-08	6.05E-10	4.89E-11	2.77E-11	1.45E-10	9.70E-06	1
OG0000038	PX	RhoGAP	0.0051073836	3.53E-05	0.0032970908	5.08E-04	8.80E-01	3.56E-02	6.11E-02	1
OG0000038	RhoGEF	RhoGAP	0.1802346872	8.62E-03	0.0041819456	0.0966324194	0.1049416408	0.0042427566	0.4826660672	1
OG0000038	SH2	C1_1	0.1522934134	0.0072836747	0.7012828684	0.1285245665	0.0126126722	5.14E-04	8.82E-04	1
OG0000038	SH2	RhoGAP	0.0109070599	3.15E-04	0.0301342571	0.6918627892	6.78E-02	2.75E-03	1.59E-01	1
OG0000038	WW	RhoGAP	1.47E-02	4.96E-04	4.75E-02	8.62E-03	0.6816140355	0.0275481461	0.0472227624	1
OG0000039	FERM_M	MyTH4	7.24E-06	7.52E-06	1.27E-03	1.38E-04	6.48E-02	0.0026206578	0.7354701964	1
OG0000039	IQ	DIL	6.29E-06	1.55E-06	1.51E-08	9.86E-08	9.12E-05	3.71E-06	0.0123962835	1
OG0000039	IQ	FERM_M	2.04E-06	2.24E-05	0.0155283733	3.97E-03	0.0064656744	2.67E-04	0.7555548811	1
OG0000039	IQ	Myosin_TH1	1.54E-05	3.78E-04	7.34E-06	1.15E-05	4.44E-05	3.06E-04	2.03E-01	1
OG0000039	IQ	MyTH4	1.11E-06	2.43E-07	8.88E-05	2.98E-03	0.0049436287	2.08E-04	0.757296485	1
OG0000039	IQ	RhoGAP	1.52E-01	7.24E-03	6.97E-01	1.28E-01	1.25E-02	5.11E-04	8.76E-04	1
OG0000039	Myosin_head	DIL	4.12E-06	4.77E-07	1.59E-09	1.05E-08	1.07E-05	8.44E-07	8.78E-03	1
OG0000039	Myosin_head	FERM_M	6.00E-08	2.66E-08	1.64E-08	3.14E-06	0.0015203231	6.75E-05	0.301965184	1
OG0000039	Myosin_head	IQ	0.00E+00	0.00E+00	0.00E+00	0.00E+00	0	1.35E-13	2.89E-05	1
OG0000039	Myosin_head	Myosin_tail_1	3.15E-06	1.69E-06	1.97E-08	1.25E-06	3.22E-06	1.09E-05	0.0292504443	1
OG0000039	Myosin_head	Myosin_TH1	2.53E-14	0	0	0	0	3.74E-12	2.07E-06	1
OG0000039	Myosin_head	Myosin-VI_CBD	2.84E-04	8.58E-03	0.823469522	0.1509726346	0.0148143155	6.03E-04	0.0010343463	1
OG0000039	Myosin_head	MyTH4	7.71E-11	9.91E-12	7.24E-12	1.99E-10	7.93E-11	1.82E-09	4.28E-04	1
OG0000039	Myosin_head	PH	3.41E-06	4.02E-07	4.29E-08	6.24E-06	4.77E-07	3.42E-06	0.0014399463	1
OG0000039	Myosin_head	RA	2.80E-04	8.49E-03	8.15E-01	0.1493858468	1.47E-02	5.97E-04	0.0078000876	1
OG0000039	Myosin_head	RhoGAP	0.1522472863	7.24E-03	6.97E-01	1.28E-01	1.25E-02	5.11E-04	8.76E-04	1
OG0000039	Myosin_head	SH3_1	6.00E-06	9.48E-07	6.31E-06	6.47E-08	1.03E-06	3.29E-06	0.002104533	1
OG0000039	Myosin_head	SH3_9	1.74E-05	3.75E-04	3.32E-08	1.37E-06	2.05E-06	1.38E-05	2.78E-02	1
OG0000039	Myosin_N	IQ	1.96E-05	3.90E-04	2.35E-07	9.59E-04	7.94E-05	2.94E-06	1.16E-03	1
OG0000039	Myosin_N	Myosin_head	1.15E-08	9.12E-09	6.73E-11	9.97E-09	6.29E-10	6.23E-09	3.00E-06	1
OG0000039	Myosin_N	Myosin_tail_1	5.80E-06	1.94E-06	2.62E-08	2.38E-05	2.05E-03	8.29E-05	2.97E-02	1
OG0000039	Myosin_N	Myosin-VI_CBD	0.0197586595	6.11E-01	3.06E-01	5.61E-02	5.51E-03	2.27E-04	3.90E-04	1
OG0000039	MyTH4	FERM_M	1.83E-08	1.42E-08	1.14E-08	1.07E-07	5.77E-06	1.37E-07	6.40E-04	1
OG0000039	MyTH4	RA	2.80E-04	8.49E-03	8.15E-01	1.49E-01	1.47E-02	5.97E-04	7.80E-03	1
OG0000039	PH	FERM_M	3.49E-04	8.10E-04	1.56E-01	7.57E-01	7.43E-02	3.01E-03	5.16E-03	1
OG0000039	PH	MyTH4	7.56E-05	3.86E-06	5.54E-04	9.00E-01	8.84E-02	3.58E-03	6.15E-03	1
OG0000039	Pkinase	Myosin_head	1.98E-02	6.11E-01	3.06E-01	5.61E-02	5.51E-03	2.27E-04	3.90E-04	1
OG0000039	RA	FERM_M	2.80E-04	0.0084939037	0.8149208875	0.1493858468	1.47E-02	5.97E-04	7.80E-03	1
OG0000039	SH3_2	MyTH4	5.49E-02	2.47E-03	2.37E-01	4.34E-02	4.19E-03	1.71E-04	5.22E-01	1
OG0000040	CRAL_TRIO	Y_phosphatase	7.49E-04	1.98E-03	1.90E-01	7.27E-01	7.13E-02	2.89E-03	4.95E-03	1
OG0000040	FERM_C	PDZ	1.78E-02	6.10E-01	3.09E-01	5.67E-02	5.57E-03	2.30E-04	3.94E-04	1
OG0000040	FERM_C	Y_phosphatase	3.16E-06	4.24E-06	3.02E-04	8.99E-01	8.89E-02	3.61E-03	6.22E-03	1
OG0000040	FERM_M	FERM_C	3.99E-06	4.50E-06	3.06E-04	9.00E-01	8.87E-02	3.60E-03	6.20E-03	1
OG0000040	FERM_M	PDZ	0.0120547496	6.05E-01	3.18E-01	5.87E-02	5.76E-03	2.38E-04	4.08E-04	1
OG0000040	FERM_M	Y_phosphatase	9.61E-07	2.97E-06	2.84E-04	8.99E-01	8.95E-02	3.65E-03	6.33E-03	1
OG0000040	FERM_N	FERM_C	2.62E-01	4.56E-01	2.34E-01	4.30E-02	4.23E-03	1.76E-04	3.02E-04	1
OG0000040	FERM_N	FERM_M	2.62E-01	4.56E-01	2.34E-01	4.30E-02	4.23E-03	1.76E-04	3.02E-04	1
OG0000040	FERM_N	Y_phosphatase	0.2615718705	0.4564425433	0.2340408276	0.0430287321	4.23E-03	1.76E-04	3.02E-04	1
OG0000040	fn3	Y_phosphatase	4.57E-05	4.66E-04	5.60E-02	8.49E-01	8.39E-02	3.41E-03	5.88E-03	1
OG0000040	Ig_3	fn3	8.61E-01	4.22E-02	2.13E-02	3.93E-03	3.95E-04	2.08E-05	3.61E-05	1
OG0000040	Ig_3	Y_phosphatase	9.24E-01	4.69E-02	2.37E-02	4.37E-03	4.38E-04	2.25E-05	3.90E-05	0
OG0000040	ig	Y_phosphatase	0.8962834302	4.39E-02	2.21E-02	4.08E-03	4.10E-04	2.14E-05	3.71E-05	1
OG0000040	I-set	fn3	9.18E-01	5.08E-02	2.57E-02	4.75E-03	4.76E-04	2.41E-05	4.17E-05	0
OG0000040	I-set	Y_phosphatase	8.87E-01	7.00E-02	3.62E-02	6.69E-03	6.66E-04	3.17E-05	5.48E-05	1
OG0000040	PDZ	Y_phosphatase	6.04E-03	5.89E-01	3.35E-01	6.27E-02	6.16E-03	2.54E-04	4.36E-04	1
OG0000040	SH2	Y_phosphatase	6.49E-06	7.70E-06	5.57E-04	9.00E-01	8.83E-02	3.58E-03	6.13E-03	1
OG0000041	Pkinase	AdenylateSensor	1.94E-05	3.82E-04	4.10E-07	1.77E-03	1.61E-01	6.56E-03	2.22E-01	1
OG0000041	Pkinase	KA1	1.71E-12	0.00E+00	0.00E+00	0.00E+00	0.00E+00	5.26E-11	3.07E-04	1
OG0000043	Exo_endo_phos_2	RVT_1	8.94E-01	6.51E-02	3.36E-02	6.20E-03	6.18E-04	2.98E-05	5.15E-05	1
OG0000044	zf-C3HC4	zf-TRAF	4.85E-03	3.98E-04	2.13E-05	6.72E-06	4.90E-04	1.67E-03	2.87E-03	1
OG0000044	zf-RING_5	zf-TRAF	8.47E-01	4.14E-02	2.08E-02	3.85E-03	3.87E-04	2.05E-05	3.55E-05	1
OG0000045	F-box-like	LRR_6	8.57E-01	4.78E-02	2.42E-02	4.47E-03	1.43E-02	5.83E-04	3.38E-02	1
OG0000047	Kelch_1	BTB	0.0044921387	2.10E-06	1.16E-05	6.79E-05	2.33E-07	5.32E-07	1.43E-03	1
OG0000047	Kelch_1	Kelch_3	1.10E-02	3.61E-04	1.82E-07	1.37E-06	5.99E-08	4.35E-09	3.37E-06	1
OG0000047	Kelch_1	Kelch_4	0.010921317	3.50E-04	2.94E-08	8.83E-07	2.12E-08	3.33E-09	7.78E-07	1
OG0000047	Kelch_1	Kelch_5	3.25E-02	1.39E-03	5.13E-04	1.20E-06	1.25E-07	6.10E-07	8.01E-04	1
OG0000047	Kelch_1	Kelch_6	3.63E-02	1.56E-03	5.98E-04	1.64E-05	1.60E-05	3.80E-07	1.01E-03	1
OG0000047	Kelch_2	Kelch_3	4.66E-03	5.48E-06	3.32E-04	4.62E-03	3.34E-04	1.33E-05	3.42E-02	1
OG0000047	Kelch_3	BTB	9.28E-06	6.73E-05	6.27E-03	1.06E-03	3.27E-08	9.19E-09	1.02E-05	1
OG0000047	Kelch_3	Kelch_1	4.50E-03	7.16E-06	5.02E-04	1.09E-06	6.55E-08	5.13E-09	2.33E-06	1
OG0000047	Kelch_3	Kelch_2	7.46E-01	3.64E-02	1.83E-02	8.81E-02	8.65E-03	3.54E-04	4.63E-03	1
OG0000047	Kelch_3	Kelch_4	1.70E-06	6.42E-07	2.51E-08	3.25E-07	4.71E-09	1.26E-09	8.39E-07	1
OG0000047	Kelch_3	Kelch_5	0.0123236092	3.96E-04	6.83E-06	1.26E-06	8.33E-08	1.80E-08	2.50E-06	1
OG0000047	Kelch_3	Kelch_6	3.90E-05	2.04E-06	1.63E-06	4.52E-03	8.16E-04	3.28E-05	3.52E-05	1
OG0000047	Kelch_4	BTB	5.57E-04	1.43E-03	5.24E-04	1.20E-06	3.70E-08	9.33E-09	2.88E-06	1
OG0000047	Kelch_4	Kelch_1	1.92E-05	3.81E-04	1.22E-06	4.96E-04	6.36E-08	4.35E-09	2.06E-06	1
OG0000047	Kelch_4	Kelch_3	5.56E-07	2.58E-09	5.99E-11	3.27E-09	7.21E-11	2.52E-11	1.96E-07	1
OG0000047	Kelch_4	Kelch_5	2.01E-04	3.71E-04	2.85E-08	1.07E-06	3.35E-08	1.18E-08	5.24E-06	1
OG0000047	Kelch_4	Kelch_6	1.42E-04	6.10E-04	1.14E-04	7.89E-05	1.61E-05	3.81E-07	8.65E-04	1
OG0000047	Kelch_5	Kelch_3	1.24E-02	3.93E-04	1.17E-05	7.36E-05	7.11E-06	1.78E-08	1.87E-05	1
OG0000047	Kelch_5	Kelch_4	1.92E-04	3.57E-04	1.93E-08	1.12E-06	5.90E-06	6.66E-09	2.52E-06	1
OG0000047	Kelch_6	Kelch_1	0.0121602986	3.82E-04	6.20E-06	8.26E-05	4.60E-03	1.86E-04	1.06E-01	1
OG0000047	Kelch_6	Kelch_3	1.47E-02	5.00E-04	5.90E-05	1.27E-03	6.82E-06	8.06E-09	2.17E-06	1
OG0000047	Kelch_6	Kelch_4	2.07E-04	3.87E-04	1.12E-07	1.50E-06	6.81E-06	8.51E-09	3.27E-06	1
OG0000048	rve	RVT_2	1.21E-03	9.44E-02	5.25E-02	2.04E-01	2.00E-02	8.11E-04	4.70E-02	1
OG0000051	Helitron_like_N	PIF1	0.9209085797	4.88E-02	2.47E-02	4.56E-03	4.56E-04	2.33E-05	4.03E-05	0
OG0000051	PIF1	Herpes_Helicase	3.80E-04	9.07E-04	2.61E-04	3.60E-03	3.26E-01	1.32E-02	2.26E-02	1
OG0000052	Cadherin	EGF	0.0382038034	5.54E-01	3.37E-01	6.36E-02	6.26E-03	2.58E-04	4.43E-04	1
OG0000052	Cadherin	Laminin_G_2	8.90E-01	5.64E-02	2.89E-02	5.33E-03	5.33E-04	2.64E-05	4.56E-05	1
OG0000052	EGF	Laminin_G_2	8.90E-01	4.96E-02	2.52E-02	4.65E-03	4.65E-04	2.36E-05	4.09E-05	1
OG0000053	Ig_2	fn3	0.8588581577	8.67E-02	4.53E-02	8.37E-03	8.31E-04	3.84E-05	6.63E-05	1
OG0000053	Ig_2	ig	0.9254711547	4.64E-02	2.34E-02	4.32E-03	4.33E-04	2.23E-05	3.87E-05	0
OG0000053	Ig_2	Ig_3	0.8544413445	8.93E-02	4.68E-02	8.66E-03	8.59E-04	3.95E-05	6.82E-05	1
OG0000053	Ig_2	I-set	0.6840587127	0.1860992091	0.1075478186	0.0201845551	1.99E-03	8.54E-05	1.47E-04	1
OG0000053	Ig_3	fn3	0.8652896921	0.0828824863	0.0431250658	0.0079738609	7.92E-04	3.68E-05	6.36E-05	1
OG0000053	Ig_3	ig	9.25E-01	4.64E-02	2.34E-02	4.31E-03	4.33E-04	2.23E-05	3.87E-05	0
OG0000053	Ig_3	Ig_2	0.8166456984	0.1115700575	0.0596419512	1.11E-02	1.10E-03	4.91E-05	8.46E-05	1
OG0000053	Ig_3	I-set	7.24E-01	1.64E-01	9.27E-02	1.73E-02	1.71E-03	7.40E-05	1.27E-04	1
OG0000053	ig	fn3	0.925379436	4.60E-02	2.32E-02	4.28E-03	4.29E-04	2.22E-05	3.85E-05	0
OG0000053	ig	Ig_2	9.21E-01	4.89E-02	2.48E-02	0.0045711146	4.58E-04	2.33E-05	4.04E-05	0
OG0000053	ig	Ig_3	9.17E-01	4.53E-02	2.28E-02	4.21E-03	4.23E-04	2.19E-05	3.80E-05	0
OG0000053	ig	I-set	0.8541440638	8.95E-02	4.69E-02	8.67E-03	8.60E-04	3.96E-05	6.83E-05	1
OG0000053	I-set	fn3	0.7299069864	1.61E-01	0.090562769	0.0169286145	0.0016715186	7.24E-05	1.25E-04	1
OG0000053	I-set	ig	0.8643455596	0.083400468	0.0434765832	0.008041151	7.98E-04	3.71E-05	6.40E-05	1
OG0000053	I-set	Ig_2	0.6819369755	1.87E-01	1.08E-01	2.03E-02	2.01E-03	8.60E-05	1.48E-04	1
OG0000053	I-set	Ig_3	0.7371941556	1.57E-01	8.78E-02	1.64E-02	1.62E-03	7.03E-05	1.21E-04	1
OG0000054	MORN	VPS9	0.0124040342	3.87E-04	7.30E-07	0.0019831272	7.64E-05	2.60E-04	2.97E-02	1
OG0000054	RCC1	MORN	2.31E-02	9.27E-04	2.93E-04	8.55E-01	8.39E-02	3.39E-03	5.82E-03	1
OG0000054	RCC1	VPS9	0.0231039059	9.27E-04	2.93E-04	0.8551760629	8.39E-02	0.0033937849	0.005816882	1
OG0000054	RhoGEF	MORN	0.0047707836	1.15E-05	9.14E-04	7.04E-05	8.20E-04	2.79E-03	0.7857157524	1
OG0000055	DEK_C	DSPc	6.43E-06	4.18E-06	2.13E-04	9.00E-01	8.84E-02	3.58E-03	6.14E-03	0
OG0000055	Rhodanese	DSPc	1.03E-07	5.54E-07	2.61E-08	6.83E-05	1.59E-05	4.35E-07	8.87E-04	1
OG0000057	Sushi	Lectin_C	0.0182693225	5.67E-01	2.84E-01	5.21E-02	5.11E-03	2.11E-04	3.63E-04	1
OG0000058	Pkinase	DUF3543	4.58E-03	2.02E-06	2.23E-08	3.83E-06	2.29E-04	9.01E-06	2.33E-02	1
OG0000058	Pkinase	MIT	6.86E-01	3.35E-02	1.68E-02	2.40E-01	2.35E-02	9.56E-04	1.64E-03	1
OG0000062	Cofilin_ADF	SH3_9	5.03E-03	2.36E-05	2.08E-03	9.84E-03	8.75E-01	3.54E-02	6.07E-02	1
OG0000062	SH2	SH3_1	3.69E-07	3.16E-07	1.62E-04	8.88E-01	9.82E-02	4.22E-03	7.80E-03	1
OG0000062	SH2	SH3_2	2.81E-04	8.57E-03	8.23E-01	1.51E-01	1.48E-02	6.04E-04	1.03E-03	1
OG0000062	SH3_1	SH2	6.17E-06	5.79E-07	7.76E-05	8.49E-01	1.28E-01	6.22E-03	1.29E-02	1
OG0000062	SH3_1	SH3_2	1.55E-06	4.11E-07	1.49E-06	7.59E-03	6.86E-04	5.27E-03	7.61E-01	1
OG0000062	SH3_1	SH3_9	6.80E-03	3.13E-04	1.83E-08	1.74E-06	6.56E-05	2.30E-04	7.71E-01	1
OG0000062	SH3_2	SH3_1	0.0047792819	1.65E-05	0.0013995056	0.8988218845	0.0881838939	3.57E-03	0.0061167952	1
OG0000062	SH3_2	SH3_9	6.09E-05	1.26E-04	0.0119311416	0.0020935211	8.83E-05	3.03E-04	7.85E-01	1
OG0000062	SH3_9	SH3_1	0.0027993509	7.32E-07	5.67E-09	2.01E-07	8.90E-08	2.54E-06	1.46E-03	1
OG0000063	WW	adh_short	0.8840992352	4.31E-02	2.17E-02	4.01E-03	4.02E-04	2.11E-05	3.66E-05	1
OG0000066	PH	Actin	2.83E-04	8.57E-03	8.22E-01	1.51E-01	1.48E-02	6.02E-04	1.03E-03	1
OG0000067	PDZ	PH	2.84E-04	8.58E-03	8.23E-01	1.51E-01	1.48E-02	6.03E-04	1.03E-03	1
OG0000067	PH	DEP	1.48E-01	7.03E-03	6.77E-01	1.24E-01	1.22E-02	4.97E-04	8.52E-04	1
OG0000067	PH	FERM_M	2.88E-01	4.17E-01	2.09E-01	3.83E-02	3.77E-03	1.57E-04	2.70E-04	1
OG0000067	SH2	PH	0.0948374378	0.5612984719	0.2856481448	0.0524455697	5.15E-03	2.13E-04	3.66E-04	1
OG0000068	Myb_DNA-bind_6	Myb_DNA-binding	7.63E-05	2.08E-06	4.66E-06	1.32E-06	7.14E-06	1.81E-08	5.75E-06	1
OG0000068	Myb_DNA-binding	Myb_DNA-bind_6	4.26E-04	3.95E-04	5.19E-06	1.18E-06	6.81E-06	9.26E-09	3.32E-06	1
OG0000070	Inhibitor_I29	Peptidase_C1	0	0	0	1.75E-12	0.00E+00	0.00E+00	1.79E-09	1
OG0000073	C1_1	C2	0.1697981424	0.5167236637	0.2603709154	0.0477295087	4.69E-03	1.94E-04	3.33E-04	1
OG0000073	C1_1	Pkinase	3.07E-10	6.65E-10	2.89E-09	3.91E-04	2.67E-01	1.10E-01	4.72E-01	1
OG0000073	C1_1	Pkinase_C	7.92E-08	3.14E-08	7.02E-08	8.00E-04	3.66E-01	1.07E-01	4.02E-01	1
OG0000073	C2	C1_1	7.22E-06	2.06E-06	2.73E-06	0.0094255068	0.8773692602	3.56E-02	6.14E-02	1
OG0000073	C2	Pkinase	8.55E-11	1.18E-11	1.33E-12	2.39E-09	5.26E-07	3.80E-05	2.29E-01	1
OG0000073	C2	Pkinase_C	3.60E-09	1.88E-10	6.41E-12	8.59E-09	2.78E-06	1.48E-04	7.27E-01	1
OG0000073	PB1	C1_1	0.1530060615	0.0072772038	0.7003760953	0.1283421175	0.0125946774	5.14E-04	8.81E-04	1
OG0000073	PB1	Pkinase	0.1529321269	0.0072775406	0.7004363811	0.128354718	1.26E-02	5.14E-04	8.81E-04	1
OG0000073	PB1	Pkinase_C	0.1530842333	0.0072765959	0.7002869539	0.1283240393	1.26E-02	5.14E-04	8.81E-04	1
OG0000073	PH	Pkinase	2.72E-06	1.81E-05	3.98E-03	7.46E-04	3.46E-08	2.16E-07	8.25E-04	1
OG0000073	PH	Pkinase_C	1.71E-04	3.48E-05	0.0065579493	0.0011235612	1.03E-06	1.05E-05	2.89E-02	1
OG0000073	Pkinase	Pkinase_C	0	0	0	0	0.00E+00	1.48E-14	1.08E-06	1
OG0000073	PX	Pkinase	7.19E-06	2.03E-06	3.10E-08	3.05E-05	2.88E-04	9.82E-04	1.67E-03	1
OG0000073	PX	Pkinase_C	7.25E-06	2.04E-06	7.25E-07	0.0019594694	2.60E-02	1.05E-03	1.78E-03	1
OG0000074	ABC_membrane	ABC_tran	0	0	0	0	0.00E+00	0.00E+00	4.40E-12	1
OG0000074	ABC_tran	ABC_membrane	8.56E-11	1.51E-13	0	0.00E+00	3.06E-11	2.41E-09	6.43E-05	1
OG0000077	DUF3350	RabGAP-TBC	0.8438982318	0.0411184123	0.0207022209	0.0038243701	3.85E-04	2.04E-05	3.54E-05	1
OG0000077	DUF3694	RabGAP-TBC	0.1524002506	0.007282404	0.7011164586	0.1284915021	1.26E-02	5.14E-04	8.82E-04	1
OG0000077	GRAM	RabGAP-TBC	1.85E-05	3.58E-04	1.93E-08	3.02E-06	0.0051834451	2.13E-04	7.66E-01	1
OG0000077	PID	DUF3694	0.8840357016	0.0430777247	0.0216835609	0.004003961	4.02E-04	2.11E-05	3.66E-05	1
OG0000077	PID	RabGAP-TBC	0.9246994066	0.0457331828	0.0230368775	4.25E-03	4.27E-04	2.21E-05	3.83E-05	0
OG0000078	ubiquitin	Ribosomal_L40e	7.43E-05	1.98E-06	2.07E-08	6.57E-08	1.61E-07	2.92E-07	7.52E-04	1
OG0000078	ubiquitin	Ribosomal_S27	6.72E-06	1.77E-06	1.76E-08	5.34E-08	6.56E-08	8.76E-09	5.57E-06	1
OG0000079	fn3	7tm_2	0.1729304447	0.5087372721	0.255242038	4.68E-02	4.59E-03	1.90E-04	3.27E-04	1
OG0000079	fn3	GPS	0.1729304447	0.5087372721	0.255242038	4.68E-02	4.59E-03	1.90E-04	3.27E-04	1
OG0000079	GAIN	7tm_2	0.8631253401	0.0831612883	0.0435826519	0.0080679898	8.01E-04	3.72E-05	6.42E-05	1
OG0000079	GAIN	GPS	0.8711040686	7.78E-02	4.06E-02	7.52E-03	7.47E-04	3.50E-05	6.05E-05	1
OG0000079	GPS	7tm_2	1.18E-12	2.10E-06	0.5511052703	0.399720907	4.31E-02	1.84E-03	3.37E-03	1
OG0000079	HRM	7tm_2	0.9035880146	0.0476790104	0.0241154854	0.0044528926	4.46E-04	2.29E-05	3.96E-05	0
OG0000079	HRM	GAIN	0.9045418134	0.0460246107	0.0232273046	4.29E-03	4.30E-04	2.22E-05	3.85E-05	0
OG0000079	HRM	GPS	9.04E-01	4.77E-02	2.41E-02	4.45E-03	4.46E-04	2.29E-05	3.96E-05	0
OG0000079	Ig_2	7tm_2	0.861799188	0.0424691555	0.0213953651	0.003951725	3.97E-04	2.09E-05	3.62E-05	1
OG0000079	Ig_2	GPS	0.861799188	0.0424691555	0.0213953651	3.95E-03	3.97E-04	2.09E-05	3.62E-05	1
OG0000079	Ig_3	7tm_2	0.9127064239	0.0446096968	0.0224554652	4.15E-03	4.16E-04	2.16E-05	3.75E-05	0
OG0000079	Ig_3	GPS	9.13E-01	0.0446096968	0.0224554652	0.004145364	4.16E-04	2.16E-05	3.75E-05	0
OG0000079	I-set	7tm_2	0.9169145327	0.045675344	0.0230192123	0.0042494462	4.26E-04	2.21E-05	3.82E-05	0
OG0000079	I-set	GPS	0.9182817254	0.0459498524	0.0231639917	4.28E-03	4.29E-04	2.22E-05	3.84E-05	0
OG0000081	FHA	Forkhead	7.63E-05	2.06E-06	2.28E-06	9.13E-03	8.78E-01	3.56E-02	6.12E-02	1
OG0000082	PP2C	PP2C_C	0.9194768706	0.0494260027	0.0250241039	0.0046201977	4.63E-04	2.35E-05	4.08E-05	0
OG0000083	RRM_1	RRM_6	0.9264283634	0.0454086865	0.0228600731	4.22E-03	4.23E-04	2.19E-05	3.80E-05	0
OG0000084	RWD	IBR	7.10E-05	2.00E-06	3.55E-08	4.13E-06	2.65E-04	1.05E-05	0.0154115706	1
OG0000084	zf-C3HC4_2	IBR	0.0128491515	4.07E-04	1.17E-05	5.30E-02	1.08E-02	4.38E-04	4.99E-02	1
OG0000084	zf-C3HC4	IBR	7.83E-05	8.36E-06	6.08E-04	1.46E-05	1.57E-07	2.72E-07	7.53E-04	1
OG0000086	BRK	SNF2_N	9.19E-01	0.0448652803	0.0225812164	0.0041683084	4.18E-04	2.17E-05	3.77E-05	0
OG0000086	Chromo	CHDCT2	0.9044291245	0.0441039951	0.0221986461	0.0040982571	4.11E-04	2.15E-05	3.72E-05	0
OG0000086	Chromo	DUF1086	0.902835157	0.044025873	0.022158978	0.0040907592	4.10E-04	2.14E-05	3.71E-05	0
OG0000086	Chromo	DUF1087	0.8958857677	0.0438669397	0.0220763012	4.07E-03	4.04E-04	2.09E-05	3.54E-05	1
OG0000086	Chromo	DUF4208	0.0123877338	3.85E-04	3.98E-08	8.38E-05	7.47E-03	3.02E-04	1.08E-01	1
OG0000086	Chromo	Helicase_C	7.26E-09	3.78E-10	7.43E-14	5.69E-12	3.05E-11	4.96E-11	6.90E-07	1
OG0000086	Chromo	SNF2_N	5.70E-09	3.21E-10	6.56E-14	5.28E-12	2.84E-11	4.70E-11	6.82E-07	1
OG0000086	DUF1086	CHDCT2	0.9232668439	0.0450526608	0.0226748051	4.19E-03	4.20E-04	2.18E-05	3.78E-05	0
OG0000086	DUF1087	CHDCT2	0.9232668439	4.51E-02	2.27E-02	4.19E-03	4.20E-04	2.18E-05	3.78E-05	0
OG0000086	DUF1087	DUF1086	9.22E-01	4.50E-02	2.26E-02	4.18E-03	4.19E-04	2.17E-05	3.77E-05	0
OG0000086	HAND	SLIDE	6.28E-06	1.91E-06	2.02E-08	6.47E-08	1.96E-07	4.17E-07	1.09E-03	1
OG0000086	Helicase_C	Bromodomain	4.70E-06	1.30E-06	1.31E-08	4.34E-08	2.52E-07	7.74E-07	6.38E-06	1
OG0000086	Helicase_C	CHDCT2	9.04E-01	4.41E-02	2.22E-02	4.10E-03	4.11E-04	2.15E-05	3.72E-05	0
OG0000086	Helicase_C	DUF1086	0.902835157	4.40E-02	2.22E-02	4.09E-03	4.10E-04	2.14E-05	3.71E-05	0
OG0000086	Helicase_C	DUF1087	8.96E-01	4.39E-02	2.21E-02	4.07E-03	4.04E-04	2.09E-05	3.54E-05	1
OG0000086	Helicase_C	DUF4208	1.24E-02	3.85E-04	3.97E-08	8.38E-05	7.47E-03	3.02E-04	1.08E-01	1
OG0000086	Helicase_C	HAND	7.07E-06	1.96E-06	2.06E-08	6.57E-08	1.99E-07	4.22E-07	1.10E-03	1
OG0000086	Helicase_C	SLIDE	7.12E-06	1.97E-06	2.07E-08	6.58E-08	7.93E-08	9.27E-09	3.73E-06	1
OG0000086	Helicase_C	SnAC	6.01E-06	1.85E-06	2.02E-08	2.82E-06	1.48E-04	5.18E-04	9.01E-04	1
OG0000086	HSA	BRK	9.19E-01	0.0449107519	0.0226056005	0.0041728198	4.19E-04	2.17E-05	3.77E-05	0
OG0000086	HSA	Bromodomain	3.78E-05	1.92E-06	2.10E-08	3.74E-06	0.0063954494	2.22E-02	2.99E-01	1
OG0000086	HSA	Helicase_C	3.63E-05	1.80E-06	1.87E-08	6.71E-08	1.33E-05	4.68E-05	1.78E-02	1
OG0000086	HSA	SnAC	7.60E-05	2.03E-06	2.94E-08	3.54E-05	3.08E-03	1.05E-02	1.81E-02	1
OG0000086	HSA	SNF2_N	3.16E-05	1.49E-06	1.50E-08	5.45E-08	1.09E-05	4.11E-05	1.72E-02	1
OG0000086	PHD	Chromo	0.8589353188	0.0421530929	0.0212228944	3.92E-03	3.90E-04	2.04E-05	3.46E-05	1
OG0000086	PHD	DUF1087	0.8819040451	0.0431379743	0.0217193653	0.0040106524	4.03E-04	2.11E-05	3.66E-05	1
OG0000086	PHD	Helicase_C	0.1308481281	0.3853753484	0.1933336147	0.0353929194	3.45E-03	1.43E-04	2.40E-04	1
OG0000086	PHD	SNF2_N	0.1299909382	0.3856236087	0.1936384069	0.03545414	3.45E-03	1.43E-04	2.40E-04	1
OG0000086	QLQ	BRK	9.19E-01	4.49E-02	2.26E-02	4.17E-03	4.18E-04	2.17E-05	3.77E-05	0
OG0000086	QLQ	Bromodomain	0.0674253278	0.0030894285	0.0013724424	1.62E-04	2.86E-01	1.16E-02	1.98E-02	1
OG0000086	QLQ	Helicase_C	0.0332217034	1.41E-03	5.19E-04	5.87E-07	9.20E-04	3.69E-05	4.22E-05	1
OG0000086	QLQ	HSA	0.1236605784	5.89E-03	2.79E-03	4.30E-04	7.61E-01	3.08E-02	5.27E-02	1
OG0000086	QLQ	SnAC	0.6451986912	0.0314742445	0.0157826339	2.88E-03	2.67E-01	1.08E-02	1.85E-02	1
OG0000086	QLQ	SNF2_N	0.0330199781	1.41E-03	5.19E-04	5.87E-07	9.20E-04	3.69E-05	4.22E-05	1
OG0000086	SnAC	Bromodomain	7.01E-06	1.96E-06	1.21E-07	4.55E-04	4.15E-02	1.44E-01	2.52E-01	1
OG0000086	SNF2_N	Bromodomain	5.15E-06	1.46E-06	1.49E-08	4.89E-08	2.81E-07	8.31E-07	6.51E-06	1
OG0000086	SNF2_N	CHDCT2	9.23E-01	4.51E-02	2.27E-02	4.19E-03	4.20E-04	2.18E-05	3.78E-05	0
OG0000086	SNF2_N	DUF1086	0.7830189743	3.82E-02	1.92E-02	3.53E-03	3.35E-04	1.73E-05	2.57E-05	1
OG0000086	SNF2_N	DUF1087	0.8955452511	4.40E-02	2.22E-02	4.09E-03	4.06E-04	2.10E-05	3.55E-05	1
OG0000086	SNF2_N	DUF4208	0.0123840548	3.85E-04	3.97E-08	8.38E-05	7.47E-03	3.02E-04	1.08E-01	1
OG0000086	SNF2_N	HAND	7.07E-06	1.96E-06	2.06E-08	6.57E-08	1.99E-07	4.22E-07	1.10E-03	1
OG0000086	SNF2_N	Helicase_C	0	0	0	0	0.00E+00	0.00E+00	8.55E-11	1
OG0000086	SNF2_N	SLIDE	7.12E-06	1.97E-06	2.07E-08	6.58E-08	7.93E-08	9.27E-09	3.73E-06	1
OG0000086	SNF2_N	SnAC	6.38E-06	1.98E-06	2.18E-08	3.01E-06	1.57E-04	5.37E-04	9.08E-04	1
OG0000087	Pro_isomerase	TPR_11	0.0123834906	3.84E-04	3.45E-08	1.49E-06	1.73E-05	5.88E-05	2.10E-02	1
OG0000087	RRM_1	Pro_isomerase	7.25E-06	2.36E-06	3.13E-05	5.16E-04	8.86E-01	3.58E-02	6.15E-02	1
OG0000088	FYVE	Rbsn	0.0125495029	3.93E-04	3.44E-06	9.70E-03	8.78E-01	3.55E-02	6.08E-02	1
OG0000088	PH	FYVE	1.70E-04	3.95E-05	0.0075340716	0.0013103386	1.24E-05	4.24E-05	1.17E-01	1
OG0000088	RUN	FYVE	4.18E-04	0.0127487935	0.0062058956	0.0010442428	4.09E-02	2.86E-01	5.15E-01	1
OG0000089	DIOX_N	2OG-FeII_Oxy	5.62E-11	1.44E-13	0.00E+00	0.00E+00	0.00E+00	1.18E-13	7.03E-08	1
OG0000092	zf-BED	Dimer_Tnp_hAT	0.8702511312	4.35E-02	2.19E-02	4.05E-03	4.06E-04	2.12E-05	3.69E-05	1
OG0000093	ABC2_membrane_3	ABC_tran	0.00E+00	0.00E+00	0.00E+00	0.00E+00	0.00E+00	0.00E+00	1.50E-09	1
OG0000093	ABC_tran	ABC2_membrane_3	4.33E-13	2.27E-13	6.41E-15	9.73E-11	3.77E-12	7.05E-10	7.46E-05	1
OG0000094	DUF4371	Dimer_Tnp_hAT	8.58E-01	8.73E-02	4.57E-02	8.46E-03	8.40E-04	3.88E-05	6.69E-05	1
OG0000095	Drf_FH3	FH2	2.82E-14	2.73E-15	0	0.00E+00	0.00E+00	1.77E-13	5.14E-07	1
OG0000095	Drf_GBD	Drf_FH3	2.71E-13	2.15E-14	0	0.00E+00	0.00E+00	1.34E-12	9.79E-07	1
OG0000095	Drf_GBD	FH2	3.87E-13	2.33E-14	0	0.00E+00	0.00E+00	8.87E-13	6.09E-07	1
OG0000098	FYVE_2	C2	0.9244907574	0.0460480662	0.0232059124	4.28E-03	4.30E-04	2.22E-05	3.85E-05	0
OG0000100	Histone_H2A_C	Macro	0.1527621983	0.0072823586	0.7009830314	1.28E-01	1.26E-02	5.14E-04	8.81E-04	1
OG0000100	Histone	Histone_H2A_C	4.23E-15	0	0	0.00E+00	0.00E+00	2.13E-12	2.10E-08	1
OG0000100	Histone	Macro	0.1527621983	0.0072823586	0.7009830314	1.28E-01	1.26E-02	5.14E-04	8.81E-04	1
OG0000101	EGF_CA	Ldl_recept_b	0.8762291284	0.0760977307	0.0395969365	0.0073245293	7.28E-04	3.42E-05	5.92E-05	1
OG0000101	FXa_inhibition	EGF_CA	0.8875290239	0.0478585172	0.0242413232	4.48E-03	4.49E-04	2.30E-05	3.98E-05	1
OG0000101	FXa_inhibition	Ldl_recept_a	0.9107348868	0.0553758124	0.0282356033	5.21E-03	5.21E-04	2.59E-05	4.48E-05	0
OG0000101	FXa_inhibition	Ldl_recept_b	0.8373828874	0.099265199	0.0526597411	9.76E-03	9.67E-04	4.39E-05	7.57E-05	1
OG0000101	Ldl_recept_a	cEGF	0.847542915	0.0438406498	0.0221543322	4.09E-03	4.11E-04	2.14E-05	3.72E-05	1
OG0000101	Ldl_recept_a	EGF_CA	8.73E-01	7.80E-02	4.06E-02	7.51E-03	7.46E-04	3.50E-05	6.04E-05	1
OG0000101	Ldl_recept_a	FXa_inhibition	8.89E-01	5.22E-02	2.66E-02	4.91E-03	4.91E-04	2.47E-05	4.27E-05	1
OG0000101	Ldl_recept_a	Ldl_recept_b	8.46E-01	9.43E-02	4.98E-02	9.23E-03	9.15E-04	4.18E-05	7.21E-05	1
OG0000101	Ldl_recept_b	FXa_inhibition	8.61E-01	8.51E-02	4.46E-02	8.26E-03	8.20E-04	3.80E-05	6.55E-05	1
OG0000101	Ldl_recept_b	Ldl_recept_a	8.98E-01	6.30E-02	3.24E-02	5.99E-03	5.97E-04	2.89E-05	5.00E-05	1
OG0000102	Sulfatase	Sulfatase_C	1.81E-06	7.16E-03	1.05E-02	2.16E-03	2.90E-02	1.01E-01	1.78E-01	1
OG0000103	BTB_2	Ion_trans	5.38E-01	2.59E-01	1.67E-01	3.19E-02	3.15E-03	1.32E-04	2.27E-04	1
OG0000105	Astacin	CUB	8.87E-01	5.73E-02	2.93E-02	5.42E-03	5.41E-04	2.67E-05	4.62E-05	1
OG0000105	Astacin	EGF_CA	9.23E-01	4.50E-02	2.27E-02	4.18E-03	4.20E-04	2.18E-05	3.78E-05	0
OG0000105	Astacin	FXa_inhibition	0.918450383	0.0501242384	0.0254003823	0.0046898682	4.69E-04	2.38E-05	4.12E-05	0
OG0000105	Astacin	ShK	8.43E-01	4.44E-02	2.25E-02	4.15E-03	4.16E-04	2.17E-05	3.76E-05	1
OG0000105	Astacin	TSP_1	0.9218359959	0.0477562192	2.41E-02	4.45E-03	4.46E-04	2.29E-05	3.96E-05	0
OG0000105	CUB	FXa_inhibition	0.8444119883	0.0427574642	0.0215792751	0.0039865837	4.00E-04	2.10E-05	3.65E-05	1
OG0000105	FXa_inhibition	CUB	0.8692373018	0.045023195	0.0227509285	0.0042021244	4.22E-04	2.19E-05	3.79E-05	1
OG0000105	FXa_inhibition	EGF_CA	0.8611472929	0.0419865963	0.0211379673	0.0039041419	3.92E-04	2.07E-05	3.59E-05	1
OG0000108	Ras	DnaJ	3.42E-03	1.06E-01	5.32E-02	7.54E-01	7.40E-02	2.99E-03	5.13E-03	1
OG0000109	FKBP_C	TPR_1	0.1378521073	0.2009324413	1.01E-01	4.82E-01	4.72E-02	1.91E-03	3.28E-03	1
OG0000109	FKBP_C	TPR_11	1.38E-04	9.36E-07	2.99E-08	3.62E-05	1.99E-07	4.22E-07	4.19E-06	1
OG0000109	FKBP_C	TPR_2	2.66E-01	1.28E-02	6.31E-03	1.24E-01	1.21E-02	4.91E-04	8.29E-04	1
OG0000112	DEAD	HA2	1.34E-11	2.44E-15	0.00E+00	0.00E+00	0.00E+00	8.73E-12	5.53E-05	1
OG0000112	DEAD	Helicase_C	5.68E-12	0.00E+00	0.00E+00	0.00E+00	0.00E+00	7.18E-12	4.99E-05	1
OG0000112	DEAD	OB_NTP_bind	1.64E-11	2.50E-15	0	0	0	9.58E-12	5.27E-05	1
OG0000112	HA2	OB_NTP_bind	0.00E+00	0.00E+00	0.00E+00	0.00E+00	0.00E+00	0.00E+00	8.39E-10	1
OG0000112	Helicase_C	HA2	0	0	0	0	0.00E+00	0.00E+00	3.16E-09	1
OG0000112	Helicase_C	OB_NTP_bind	0.00E+00	0.00E+00	0	0	0	0.00E+00	3.08E-09	1
OG0000112	S1	DEAD	7.63E-05	2.03E-06	3.46E-08	1.35E-06	6.62E-07	1.99E-06	5.15E-03	1
OG0000112	S1	HA2	7.60E-05	2.03E-06	3.46E-08	1.30E-06	1.69E-07	3.07E-07	7.78E-04	1
OG0000112	S1	Helicase_C	7.60E-05	2.03E-06	3.46E-08	1.30E-06	1.73E-07	3.18E-07	8.07E-04	1
OG0000112	S1	OB_NTP_bind	7.60E-05	2.03E-06	7.58E-08	1.30E-06	1.69E-07	3.07E-07	7.78E-04	1
OG0000113	ADH_N	ADH_zinc_N	2.13E-11	4.14E-14	0.00E+00	0.00E+00	0.00E+00	5.04E-14	2.48E-08	1
OG0000113	ADH_N	ADH_zinc_N_2	7.38E-06	1.01E-08	1.82E-10	1.41E-08	1.07E-09	1.67E-10	8.94E-08	1
OG0000114	Pkinase	RCC1	0.0039674431	0.0503645988	0.0286889795	8.25E-01	8.14E-02	3.30E-03	5.69E-03	1
OG0000118	Thioredoxin	PITH	7.22E-06	2.04E-06	6.26E-07	2.74E-03	2.49E-01	1.01E-02	5.84E-01	1
OG0000119	DUSP	Ubiquitin_3	0.011208792	4.09E-04	1.45E-05	0.0507240546	0.0048698006	1.97E-04	2.53E-01	1
OG0000119	DUSP	UCH	2.11E-07	7.25E-09	7.23E-11	8.59E-09	3.53E-10	2.64E-10	5.87E-07	1
OG0000119	Ubiquitin_3	UCH	0.0126408835	4.13E-04	1.45E-05	5.08E-02	4.88E-03	1.97E-04	2.53E-01	1
OG0000119	UCH	zf-MYND	3.20E-04	7.17E-04	1.64E-04	4.64E-01	4.54E-02	1.55E-01	2.66E-01	1
OG0000119	USP8_dimer	UCH	1.28E-02	4.05E-04	9.74E-06	0.0106001043	8.77E-01	3.54E-02	6.08E-02	1
OG0000119	zf-UBP	UCH	0.0037597635	1.44E-06	1.31E-08	4.32E-07	5.68E-08	2.83E-07	7.66E-04	1
OG0000120	Collagen	C4	0.8124877483	0.1139900054	0.0610790382	0.0113345907	0.0011217311	5.02E-05	8.65E-05	1
OG0000120	Collagen	COLFI	8.26E-01	0.1058068568	0.0564751168	0.0104763203	0.0010374751	4.68E-05	8.06E-05	1
OG0000121	ANF_receptor	7tm_3	0.0010269412	2.29E-04	2.49E-05	0.0013871132	0.2195909066	1.21E-02	0.5888994906	1
OG0000126	C1_1	CNH	0.0122408028	3.90E-04	0.0374132498	0.8593169483	0.0842983527	0.0034108955	0.0058467655	1
OG0000126	DUF1908	PDZ	0.1733549189	0.5087348237	0.2551594167	0.0467389096	4.59E-03	1.90E-04	3.27E-04	1
OG0000126	DUF1908	Pkinase	0.0027343289	0.0084635393	0.8211533516	0.1510091143	1.48E-02	6.04E-04	1.04E-03	1
OG0000126	KELK	C1_1	1.53E-01	7.28E-03	0.7003127304	0.1283304698	0.012593535	5.14E-04	8.81E-04	1
OG0000126	KELK	CNH	1.53E-01	0.0072829611	0.7010206813	0.1284659802	0.0126068601	5.14E-04	8.81E-04	1
OG0000126	PH	CNH	1.52E-01	0.0072304771	0.6961738573	0.1275809445	0.0125200927	5.11E-04	8.75E-04	1
OG0000126	Pkinase	C1_1	0.0041338004	8.91E-07	2.35E-06	0.0098395815	0.8652275449	0.037276477	0.06902827	1
OG0000126	Pkinase_C	CNH	2.84E-04	8.58E-03	0.8233595551	0.150945192	0.014811578	6.03E-04	0.0010341526	1
OG0000126	Pkinase_C	KELK	0.1397696926	0.0066402187	0.6408121247	0.1174253385	1.15E-02	4.70E-04	8.07E-04	1
OG0000126	Pkinase	CNH	8.71E-06	1.57E-04	0.0343250314	0.8682288659	8.61E-02	3.51E-03	6.06E-03	1
OG0000126	Pkinase	KELK	1.53E-01	7.28E-03	7.01E-01	1.28E-01	1.26E-02	5.14E-04	8.81E-04	1
OG0000126	Pkinase	PDZ	0.1733549189	0.5087348237	0.2551594167	0.0467389096	0.0045924835	1.90E-04	3.27E-04	1
OG0000126	Pkinase	Pkinase_C	1.90E-08	1.65E-09	2.82E-11	1.07E-08	1.06E-06	2.43E-07	4.86E-04	1
OG0000130	ANF_receptor	Lig_chan	0.7424517632	0.1527836313	0.0856625501	0.016004158	1.58E-03	6.87E-05	1.18E-04	1
OG0000130	ANF_receptor	Lig_chan-Glu_bd	0.7313052165	0.1597038093	0.0902883536	0.0168903769	1.67E-03	7.23E-05	1.24E-04	1
OG0000130	Lig_chan-Glu_bd	Lig_chan	0.4749795493	0.2882458838	0.1949838291	0.0375635397	0.0037048536	1.55E-04	2.66E-04	1
OG0000130	SBP_bac_3	Lig_chan	2.03E-01	1.01E-02	4.98E-03	8.50E-04	6.90E-07	1.26E-05	1.86E-06	1
OG0000132	AAA	Vps4_C	1.07E-04	3.87E-04	3.47E-08	1.36E-06	8.37E-06	6.74E-08	6.11E-06	1
OG0000132	CDC48_2	AAA	7.08E-06	1.98E-06	2.08E-08	6.61E-08	9.74E-08	7.03E-08	4.70E-06	1
OG0000132	CDC48_2	Vps4_C	2.09E-04	3.89E-04	3.51E-08	1.96E-06	6.33E-05	2.29E-06	7.96E-04	1
OG0000132	CDC48_N	AAA	6.89E-06	1.93E-06	2.02E-08	6.37E-08	9.11E-08	5.83E-08	3.69E-06	1
OG0000132	CDC48_N	CDC48_2	7.08E-06	1.98E-06	2.08E-08	6.61E-08	9.74E-08	7.03E-08	4.70E-06	1
OG0000132	CDC48_N	Vps4_C	2.09E-04	3.89E-04	3.51E-08	1.93E-06	6.08E-05	2.19E-06	7.60E-04	1
OG0000132	PEX-1N	AAA	7.61E-05	2.03E-06	3.47E-08	1.30E-06	2.00E-07	4.11E-07	1.05E-03	1
OG0000135	GST_N	GST_C	7.79E-10	6.26E-09	7.04E-09	9.07E-09	3.88E-10	1.79E-11	6.81E-08	1
OG0000139	CH	EF-hand_7	6.59E-04	7.32E-04	1.72E-04	0.0038465321	2.59E-04	8.83E-04	0.0296481528	1
OG0000139	CH	EFhand_Ca_insen	1.49E-04	2.01E-06	2.16E-08	1.29E-06	3.22E-07	8.31E-07	2.15E-03	1
OG0000139	CH	Filamin	0.0019005847	7.54E-06	5.74E-04	1.06E-05	2.50E-05	7.46E-07	2.13E-03	1
OG0000139	CH	Spectrin	1.55E-06	1.27E-06	2.90E-07	1.34E-03	2.30E-05	7.96E-05	2.94E-02	1
OG0000139	EF-hand_7	EFhand_Ca_insen	3.08E-05	7.32E-04	1.72E-04	0.0038471464	2.59E-04	8.83E-04	0.0296523204	1
OG0000139	Spectrin	EF-hand_7	6.59E-04	7.32E-04	1.72E-04	3.85E-03	2.59E-04	8.83E-04	2.96E-02	1
OG0000139	Spectrin	EFhand_Ca_insen	1.50E-04	2.02E-06	3.42E-07	1.45E-03	2.45E-05	8.32E-05	2.97E-02	1
OG0000141	Cyclin_N	Cyclin_C	0.00E+00	0.00E+00	0.00E+00	0.00E+00	0.00E+00	1.49E-13	6.90E-09	1
OG0000142	PAS_9	PDEase_I	0.8843359291	0.0433037459	0.0218041077	4.03E-03	4.04E-04	2.12E-05	3.67E-05	1
OG0000142	PDEase_I_N	PDEase_I	9.24E-01	4.56E-02	2.30E-02	4.24E-03	4.25E-04	2.20E-05	7.45E-04	0
OG0000143	SET	Rubis-subs-bind	4.80E-05	1.49E-08	3.27E-08	3.96E-08	7.99E-10	1.54E-10	1.27E-07	1
OG0000144	Ank_2	SH3_1	0.8841308739	0.0431430518	0.0217183872	4.01E-03	4.03E-04	2.11E-05	3.66E-05	1
OG0000144	ArfGap	Ank_2	1.46E-06	1.12E-08	1.80E-10	3.64E-09	1.58E-08	4.41E-07	0.0085457156	1
OG0000144	ArfGap	PH	8.16E-05	2.90E-05	8.34E-03	1.47E-03	2.73E-05	8.40E-07	2.15E-03	1
OG0000144	ArfGap	RhoGAP	2.85E-04	8.58E-03	8.23E-01	1.51E-01	1.48E-02	6.03E-04	1.03E-03	1
OG0000144	ArfGap	SH3_1	1.52E-01	7.22E-03	0.695227163	0.127395728	1.25E-02	5.10E-04	8.74E-04	1
OG0000144	BAR_3	Ank_2	1.32E-04	3.34E-04	6.54E-08	1.98E-07	6.16E-07	4.07E-06	0.0134863055	1
OG0000144	BAR_3	ArfGap	2.24E-07	9.24E-11	5.78E-14	1.49E-13	3.55E-12	2.51E-09	2.96E-04	1
OG0000144	BAR_3	PH	1.95E-06	1.27E-09	1.09E-11	6.84E-12	3.46E-11	1.20E-08	4.27E-04	1
OG0000144	BAR_3	SH3_1	1.52E-01	0.0072226767	0.695227163	0.127395728	1.25E-02	5.10E-04	8.74E-04	1
OG0000144	PH	Ank_2	3.92E-05	6.66E-07	4.90E-09	5.35E-08	1.71E-07	1.47E-06	1.01E-02	1
OG0000144	PH	ArfGap	3.10E-11	7.59E-13	0.00E+00	3.19E-15	1.16E-13	1.97E-10	2.10E-04	1
OG0000144	PH	RhoGAP	2.85E-04	0.0085811402	0.8234635114	1.51E-01	1.48E-02	6.03E-04	1.03E-03	1
OG0000144	Ras	ArfGap	7.61E-05	3.69E-06	1.59E-04	0.7179775724	7.04E-02	2.85E-03	1.65E-01	1
OG0000144	Ras	PH	9.65E-04	0.0026101163	0.0011141884	0.7149320276	7.01E-02	2.84E-03	1.64E-01	1
OG0000145	Cation_ATPase	PhoLip_ATPase_C	7.41E-05	2.16E-06	1.92E-05	3.17E-07	1.35E-04	1.93E-03	2.76E-02	1
OG0000145	E1-E2_ATPase	Cation_ATPase	7.49E-05	2.21E-06	2.03E-05	2.55E-06	1.13E-03	1.18E-02	2.12E-02	1
OG0000145	E1-E2_ATPase	HAD	1.62E-11	7.22E-14	0.00E+00	0.00E+00	0.00E+00	0.00E+00	1.08E-09	1
OG0000145	E1-E2_ATPase	PhoLip_ATPase_C	8.79E-12	2.75E-15	0.00E+00	0.00E+00	0.00E+00	0.00E+00	5.96E-10	1
OG0000145	HAD	PhoLip_ATPase_C	9.26E-15	0	0	0.00E+00	0.00E+00	0.00E+00	1.30E-10	1
OG0000145	PhoLip_ATPase_N	Cation_ATPase	7.47E-05	2.20E-06	2.00E-05	1.35E-06	9.13E-04	9.59E-03	1.73E-02	1
OG0000145	PhoLip_ATPase_N	E1-E2_ATPase	1.42E-12	0	0.00E+00	0.00E+00	0.00E+00	0.00E+00	8.14E-10	1
OG0000145	PhoLip_ATPase_N	HAD	7.41E-14	0.00E+00	0.00E+00	0.00E+00	0.00E+00	0.00E+00	6.63E-10	1
OG0000145	PhoLip_ATPase_N	PhoLip_ATPase_C	2.80E-14	0.00E+00	0.00E+00	0.00E+00	0.00E+00	0.00E+00	3.43E-10	1
OG0000146	Pkinase	CNH	4.25E-06	1.78E-06	7.17E-06	8.08E-05	7.50E-02	2.74E-01	5.13E-01	1
OG0000146	Pkinase	Mst1_SARAH	7.22E-06	2.03E-06	3.12E-07	1.31E-03	2.00E-03	6.82E-03	7.82E-01	1
OG0000146	Pkinase	PKK	1.52E-01	7.28E-03	7.01E-01	1.28E-01	1.26E-02	5.14E-04	8.81E-04	1
OG0000147	HTH_Tnp_4	DDE_Tnp_4	0.7617436878	1.43E-01	7.92E-02	1.48E-02	1.46E-03	6.38E-05	1.10E-04	1
OG0000147	THAP	DDE_Tnp_4	8.95E-01	5.66E-02	2.90E-02	5.35E-03	5.34E-04	2.64E-05	4.57E-05	1
OG0000147	THAP	HTH_Tnp_4	0.8947226589	5.46E-02	2.79E-02	5.15E-03	5.14E-04	2.56E-05	4.43E-05	1
OG0000151	Formyl_trans_C	Aldedh	9.27E-01	4.57E-02	2.30E-02	4.25E-03	4.27E-04	2.21E-05	3.83E-05	0
OG0000151	Formyl_trans_C	PP-binding	9.27E-01	4.56E-02	2.30E-02	4.24E-03	4.25E-04	2.20E-05	3.82E-05	0
OG0000151	Formyl_trans_N	Aldedh	9.27E-01	4.57E-02	2.30E-02	4.25E-03	4.27E-04	2.21E-05	3.83E-05	0
OG0000151	Formyl_trans_N	Formyl_trans_C	9.27E-01	4.57E-02	2.30E-02	4.25E-03	4.27E-04	2.21E-05	3.83E-05	0
OG0000151	Formyl_trans_N	PP-binding	9.27E-01	4.56E-02	2.30E-02	4.24E-03	4.25E-04	2.20E-05	3.82E-05	0
OG0000151	PP-binding	Aldedh	0.9268710753	4.56E-02	0.0229579312	0.0042376267	4.25E-04	2.20E-05	3.82E-05	0
OG0000152	GIDE	zf-C3HC4_3	1.09E-04	9.80E-05	0.0092068688	0.1304826588	0.0126991555	5.14E-04	8.63E-04	1
OG0000160	EF-hand_1	EF-hand_7	6.29E-05	2.02E-06	5.93E-06	2.03E-05	1.72E-03	5.87E-03	1.01E-02	1
OG0000160	EF-hand_5	EF-hand_7	2.21E-01	1.06E-02	5.21E-03	8.89E-04	1.19E-07	8.01E-07	6.48E-06	1
OG0000160	EF-hand_7	EF-hand_5	1.27E-02	4.02E-04	1.14E-05	6.79E-05	3.79E-08	1.65E-08	1.25E-05	1
OG0000160	EF-hand_8	EF-hand_7	1.40E-04	2.51E-04	1.91E-08	9.41E-07	5.60E-08	5.95E-09	2.09E-06	1
OG0000162	HSL_N	Abhydrolase_3	2.05E-06	1.50E-06	6.70E-05	5.97E-01	8.81E-02	4.25E-03	8.85E-03	1
OG0000164	HMG_box_2	HMG_box	0.0228438015	9.91E-04	3.10E-04	0.0010983439	0.1003831107	4.06E-03	0.0069456507	1
OG0000164	HMG_box	HMG_box_2	0.1354475423	0.1963115117	0.0983991684	0.4701902	0.0461215697	1.87E-03	0.0032021389	1
OG0000165	AAA_11	AAA_12	0	0.00E+00	0.00E+00	0.00E+00	0.00E+00	0.00E+00	1.05E-08	1
OG0000165	AAA_11	R3H	7.04E-03	2.04E-02	1.01E-02	1.75E-03	5.76E-05	2.12E-06	5.47E-03	1
OG0000165	AAA_11	RNB	0.9227828659	0.0452406431	0.0227763217	4.20E-03	4.22E-04	2.19E-05	3.79E-05	0
OG0000165	AAA_12	AAA_11	9.23E-01	4.53E-02	2.28E-02	4.21E-03	4.23E-04	2.19E-05	3.80E-05	0
OG0000165	AAA_12	R3H	7.05E-03	2.05E-02	1.01E-02	1.76E-03	5.78E-05	2.12E-06	5.48E-03	1
OG0000165	AAA_12	RNB	0.9234614922	0.0458610747	0.023107551	0.00426547	4.28E-04	2.21E-05	3.83E-05	0
OG0000165	AAA_19	AAA_11	2.05E-04	3.89E-04	2.36E-08	7.69E-08	1.44E-05	3.08E-07	7.77E-04	1
OG0000165	AAA_19	AAA_12	2.05E-04	3.89E-04	2.36E-08	7.69E-08	1.44E-05	3.08E-07	7.77E-04	1
OG0000165	DUF2439	AAA_12	7.58E-05	2.03E-06	8.24E-08	9.56E-06	1.64E-02	5.58E-02	7.33E-01	1
OG0000165	DUF2439	zf-GRF	7.60E-05	3.20E-06	1.12E-04	0.1442761584	1.41E-02	4.79E-02	6.28E-01	1
OG0000165	RNB	AAA_11	0.8921828938	4.46E-02	2.25E-02	4.15E-03	4.16E-04	2.16E-05	3.76E-05	1
OG0000165	RNB	AAA_12	0.8921828938	0.04456048	0.0224640258	0.0041479413	4.16E-04	2.16E-05	3.76E-05	1
OG0000165	UPF1_Zn_bind	AAA_11	6.79E-06	1.82E-06	1.84E-08	5.59E-08	1.44E-07	2.74E-07	7.54E-04	1
OG0000165	UPF1_Zn_bind	AAA_12	6.79E-06	1.82E-06	1.84E-08	5.59E-08	1.44E-07	2.74E-07	7.54E-04	1
OG0000165	UPF1_Zn_bind	AAA_19	2.08E-04	3.89E-04	2.36E-08	8.77E-08	3.29E-05	1.06E-06	8.38E-04	1
OG0000165	zf-GRF	AAA_11	7.60E-05	3.21E-06	1.13E-04	4.64E-01	4.54E-02	1.55E-01	2.66E-01	1
OG0000165	zf-GRF	AAA_12	7.57E-05	2.40E-06	3.52E-05	0.1442592926	1.41E-02	4.79E-02	6.28E-01	1
OG0000166	UQ_con	UBA	7.25E-06	2.03E-06	4.72E-08	1.16E-04	0.0104141877	4.21E-04	7.02E-04	1
OG0000167	SET	zf-MYND	3.89E-06	7.77E-07	6.74E-09	4.48E-07	4.61E-05	2.73E-06	6.62E-04	1
OG0000167	zf-MYND	SET	1.97E-05	3.89E-04	4.55E-08	8.63E-05	2.08E-05	5.67E-07	8.12E-04	1
OG0000170	EF-hand_7	Mito_carr	2.39E-04	2.74E-04	1.46E-08	7.39E-07	2.20E-08	4.51E-09	2.58E-06	1
OG0000170	EF-hand_8	Mito_carr	0.0122968484	4.02E-04	2.56E-05	0.0030619215	1.83E-04	6.25E-04	1.05E-03	1
OG0000171	Tubulin	Tubulin_C	1.00E-08	2.09E-08	2.08E-10	4.67E-10	5.74E-10	1.52E-10	3.42E-08	1
OG0000173	C2	BTK	0.0058674132	8.37E-03	8.05E-01	1.48E-01	1.45E-02	5.90E-04	1.01E-03	1
OG0000173	C2	PH	1.96E-02	6.10E-01	3.07E-01	5.62E-02	5.52E-03	2.28E-04	3.91E-04	1
OG0000173	C2	RasGAP	2.12E-11	8.98E-14	0.00E+00	3.00E-15	3.99E-12	1.95E-06	1.03E-01	1
OG0000173	PH	C2	7.40E-05	9.95E-07	1.33E-07	5.11E-04	8.84E-01	3.61E-02	6.26E-02	1
OG0000173	PH	RasGAP	3.18E-05	7.53E-07	2.53E-08	4.32E-05	7.71E-02	3.42E-03	7.09E-01	1
OG0000173	RasGAP	BTK	5.84E-03	8.37E-03	8.05E-01	1.48E-01	1.45E-02	5.90E-04	1.01E-03	1
OG0000173	RasGAP	CRAL_TRIO_2	7.37E-06	7.41E-06	5.18E-04	6.43E-08	5.41E-07	3.47E-06	9.80E-03	1
OG0000173	RasGAP	PH	0.0643621222	9.43E-02	4.73E-02	8.58E-03	1.14E-01	4.63E-03	5.26E-01	1
OG0000173	SH2	C2	0.0043328559	5.02E-06	3.18E-04	0.8992305652	0.0882162144	3.57E-03	6.12E-03	1
OG0000173	SH2	PH	7.77E-05	5.36E-06	3.18E-04	0.9000692871	8.83E-02	3.57E-03	6.13E-03	0
OG0000173	SH2	RasGAP	7.77E-05	5.36E-06	3.18E-04	9.00E-01	8.83E-02	3.57E-03	6.13E-03	0
OG0000173	SH2	SH3_1	0.1595922148	4.68E-01	2.35E-01	4.30E-02	4.23E-03	1.76E-04	3.01E-04	1
OG0000173	SH3_1	PH	0.0028159502	0.0081601637	0.783562469	1.44E-01	1.41E-02	5.74E-04	9.84E-04	1
OG0000173	SH3_1	RasGAP	2.82E-03	8.16E-03	7.84E-01	1.44E-01	1.41E-02	5.74E-04	9.84E-04	1
OG0000173	SH3_1	SH2	0.0028159502	0.0081601637	0.783562469	0.1436218532	0.0140932503	5.74E-04	9.84E-04	1
OG0000174	Metallophos	Metallophos_C	1.08E-15	0	0	3.88E-14	0.00E+00	0.00E+00	3.78E-09	1
OG0000174	Pur_ac_phosph_N	Metallophos	1.79E-15	1.83E-15	7.25E-11	5.88E-12	3.25E-15	6.78E-15	3.72E-09	1
OG0000174	Pur_ac_phosph_N	Metallophos_C	2.99E-13	3.69E-14	3.46E-10	2.55E-11	2.63E-14	4.60E-14	1.49E-08	1
OG0000175	Thioredoxin_8	NHL	8.30E-01	4.05E-02	2.04E-02	3.75E-03	3.63E-04	1.88E-05	2.16E-03	1
OG0000177	Peptidase_M1	ERAP1_C	4.01E-12	1.78E-13	0.00E+00	0.00E+00	1.36E-14	1.86E-12	3.90E-07	1
OG0000179	Exo_endo_phos	DUF1866	9.24E-01	4.51E-02	2.27E-02	4.19E-03	4.21E-04	2.18E-05	3.78E-05	0
OG0000179	Exo_endo_phos	RhoGAP	1.53E-04	1.98E-06	2.08E-08	6.64E-08	8.24E-08	1.85E-08	6.84E-06	1
OG0000179	SH2	Exo_endo_phos	2.84E-04	8.58E-03	8.23E-01	1.51E-01	1.48E-02	6.03E-04	1.03E-03	1
OG0000179	Syja_N	DUF1866	0.9237963141	4.51E-02	2.27E-02	4.19E-03	4.20E-04	2.18E-05	3.78E-05	0
OG0000179	Syja_N	Exo_endo_phos	7.18E-06	2.02E-06	1.28E-07	4.86E-04	8.44E-01	3.44E-02	5.95E-02	1
OG0000183	PDZ	LIM	0.0191592086	5.93E-01	2.97E-01	5.44E-02	5.35E-03	2.21E-04	3.79E-04	1
OG0000184	ANF_receptor	7tm_3	0.1246067067	6.74E-02	4.43E-02	6.58E-01	6.50E-02	2.64E-03	4.54E-03	1
OG0000184	ANF_receptor	NCD3G	6.18E-01	2.20E-01	1.34E-01	2.53E-02	2.49E-03	1.06E-04	1.82E-04	1
OG0000184	NCD3G	7tm_3	5.80E-01	2.39E-01	1.49E-01	2.83E-02	2.80E-03	1.18E-04	2.03E-04	1
OG0000185	PB1	Pkinase	7.60E-05	7.84E-06	5.61E-04	8.10E-06	3.86E-07	5.19E-06	1.46E-02	1
OG0000186	BTB_2	Pentapeptide	5.44E-05	5.07E-04	6.35E-05	0.0013644214	1.59E-05	3.74E-07	9.28E-04	1
OG0000186	BTB_2	Pentapeptide_4	2.92E-06	1.17E-04	7.40E-08	3.73E-04	6.12E-08	1.30E-07	6.46E-04	1
OG0000186	KHA	BTB_2	8.63E-04	2.65E-02	1.31E-02	6.25E-02	6.02E-03	2.05E-02	6.90E-01	1
OG0000186	KHA	Pentapeptide	1.74E-01	5.09E-01	2.56E-01	4.68E-02	4.60E-03	1.91E-04	6.39E-03	1
OG0000188	Gelsolin	VHP	5.24E-09	5.60E-09	2.62E-09	5.33E-09	6.69E-09	9.72E-10	3.45E-06	1
OG0000188	LRR_8	Gelsolin	7.27E-06	2.83E-06	7.66E-05	3.47E-01	3.39E-02	1.37E-03	4.89E-01	1
OG0000189	AAA	Vps4_C	4.65E-09	6.32E-11	8.76E-15	1.33E-13	8.48E-13	2.12E-10	3.27E-07	1
OG0000190	zf-RING_2	PHD	1.37E-02	4.47E-04	3.15E-05	1.43E-01	1.39E-02	5.63E-04	9.48E-04	1
OG0000191	An_peroxidase	FAD_binding_8	0.0084956379	0.0250188331	0.0123824165	0.28417951	5.87E-01	2.37E-02	4.07E-02	1
OG0000191	An_peroxidase	Ferric_reduct	0.0084716645	2.50E-02	1.24E-02	2.85E-01	5.88E-01	2.38E-02	4.07E-02	1
OG0000191	An_peroxidase	NAD_binding_6	8.52E-03	2.50E-02	1.24E-02	2.84E-01	5.86E-01	2.37E-02	4.06E-02	1
OG0000191	EF-hand_5	EF-hand_7	0.8750938408	4.28E-02	2.15E-02	3.98E-03	4.00E-04	2.10E-05	3.64E-05	1
OG0000191	EF-hand_5	FAD_binding_8	0.1723383659	0.5074352825	0.2546164356	0.0466419069	0.0045820351	1.90E-04	6.37E-03	1
OG0000191	EF-hand_5	Ferric_reduct	0.1723383659	0.5074352825	0.2546164356	4.66E-02	4.58E-03	1.90E-04	6.37E-03	1
OG0000191	EF-hand_5	NAD_binding_6	0.1723848536	5.07E-01	2.54E-01	4.66E-02	4.57E-03	1.90E-04	6.35E-03	1
OG0000191	EF-hand_6	NAD_binding_6	0.8905833218	0.043422624	0.0218571843	4.04E-03	4.05E-04	2.12E-05	3.68E-05	1
OG0000191	EF-hand_7	FAD_binding_8	0.8978140782	5.74E-02	2.93E-02	5.42E-03	8.92E-03	3.65E-04	6.27E-04	1
OG0000191	EF-hand_7	Ferric_reduct	8.95E-01	5.88E-02	3.01E-02	5.56E-03	9.15E-03	3.74E-04	6.42E-04	1
OG0000191	EF-hand_7	NAD_binding_6	8.86E-01	6.40E-02	3.29E-02	6.07E-03	9.98E-03	4.08E-04	7.01E-04	1
OG0000191	FAD_binding_8	NAD_binding_6	5.75E-13	3.27E-13	0.00E+00	0.00E+00	0.00E+00	9.35E-13	5.55E-08	1
OG0000191	Ferric_reduct	FAD_binding_8	1.45E-12	6.01E-13	0.00E+00	0.00E+00	0.00E+00	1.86E-12	6.22E-08	1
OG0000191	Ferric_reduct	NAD_binding_6	1.69E-11	5.11E-12	0.00E+00	0.00E+00	0.00E+00	3.02E-12	6.08E-08	1
OG0000194	Cyclin_N	Cyclin_C	4.60E-03	7.61E-06	5.47E-04	2.94E-06	7.22E-06	1.92E-08	7.22E-06	1
OG0000194	Cyclin_N	Cyclin_C_2	5.75E-05	1.85E-06	4.56E-08	1.21E-06	8.02E-08	1.80E-08	6.64E-06	1
OG0000197	FAD_binding_1	NAD_binding_1	2.78E-14	0.00E+00	0.00E+00	0.00E+00	0.00E+00	1.18E-15	4.69E-09	1
OG0000197	Flavodoxin_1	FAD_binding_1	3.19E-13	3.18E-14	0.00E+00	0.00E+00	0.00E+00	5.49E-14	7.44E-09	1
OG0000197	Flavodoxin_1	NAD_binding_1	1.42E-11	5.08E-13	0.00E+00	0.00E+00	0.00E+00	1.19E-13	1.13E-08	1
OG0000197	NO_synthase	FAD_binding_1	0.8593846646	4.32E-02	2.18E-02	3.37E-02	3.67E-02	1.49E-03	2.55E-03	1
OG0000197	NO_synthase	Flavodoxin_1	8.57E-01	4.44E-02	2.24E-02	3.47E-02	3.78E-02	1.53E-03	2.63E-03	1
OG0000197	NO_synthase	NAD_binding_1	0.919908498	4.69E-02	2.37E-02	4.37E-03	4.85E-03	2.01E-04	3.45E-04	0
OG0000201	Glycos_transf_2	Glyco_transf_7C	6.62E-03	2.45E-01	1.25E-01	2.29E-02	3.06E-01	1.24E-02	2.12E-02	1
OG0000201	Glycos_transf_2	Ricin_B_lectin	3.14E-08	1.69E-01	6.34E-01	1.66E-01	1.67E-02	6.87E-04	1.20E-03	1
OG0000201	Glyco_transf_7C	Ricin_B_lectin	1.63E-02	6.06E-01	3.11E-01	5.71E-02	5.61E-03	2.31E-04	3.97E-04	1
OG0000202	Beach	FYVE	8.93E-06	5.48E-05	5.06E-03	8.31E-04	1.30E-03	4.42E-03	7.58E-03	1
OG0000202	Beach	WD40	3.89E-11	4.97E-12	8.87E-14	6.72E-11	2.27E-11	5.19E-11	5.01E-07	1
OG0000202	DUF1088	Beach	0.0046544687	9.11E-06	6.95E-04	0.8991497914	8.82E-02	3.57E-03	6.12E-03	1
OG0000202	DUF1088	PH_BEACH	0.0046544687	9.11E-06	6.95E-04	8.99E-01	8.82E-02	3.57E-03	6.12E-03	1
OG0000202	DUF4704	Beach	1.76E-05	1.41E-08	8.93E-11	6.24E-10	1.17E-10	6.24E-10	3.97E-06	1
OG0000202	DUF4704	DUF4800	7.62E-05	2.03E-06	5.07E-08	1.31E-04	9.43E-05	3.21E-04	1.15E-01	1
OG0000202	DUF4704	PH_BEACH	1.76E-05	1.41E-08	8.98E-11	6.28E-10	1.17E-10	6.36E-10	4.18E-06	1
OG0000202	DUF4704	WD40	7.44E-05	1.99E-06	2.79E-07	0.0011725744	8.19E-08	1.63E-08	2.37E-05	1
OG0000202	DUF4800	Beach	7.55E-05	2.02E-06	4.98E-08	1.27E-04	8.83E-05	3.01E-04	1.15E-01	1
OG0000202	DUF4800	PH_BEACH	7.55E-05	2.02E-06	4.98E-08	1.27E-04	8.83E-05	3.01E-04	1.15E-01	1
OG0000202	DUF4800	WD40	2.19E-04	4.22E-04	1.60E-05	0.0718086901	0.0069351267	2.80E-04	1.06E-01	1
OG0000202	PH_BEACH	Beach	8.30E-14	0	0	0	0	9.66E-14	6.36E-08	1
OG0000202	PH_BEACH	FYVE	4.73E-04	0.0011669965	0.1118052535	0.0204117473	0.0346463473	1.18E-01	2.03E-01	1
OG0000202	PH_BEACH	WD40	4.96E-09	1.97E-10	4.43E-12	5.89E-10	1.66E-10	1.92E-10	1.23E-06	1
OG0000202	WD40	FYVE	3.42E-04	0.0103822591	0.0050176507	8.23E-04	0.0012857659	4.38E-03	7.51E-03	1
OG0000204	Thioredoxin	ERp29	1.90E-05	3.75E-04	2.89E-08	6.18E-08	3.79E-08	1.70E-08	6.27E-06	1
OG0000205	Neur_chan_LBD	Neur_chan_memb	0.0977814817	0.0070108274	0.698521763	0.1292690207	0.0126936758	5.18E-04	8.88E-04	1
OG0000208	SAM_1	U-box	0.8873510416	0.0433860528	0.0218430761	0.0040333079	4.05E-04	2.12E-05	3.68E-05	1
OG0000208	WD40	SAM_1	0.8439476473	0.0411124327	0.0206989347	0.0038237599	3.85E-04	2.04E-05	3.54E-05	1
OG0000208	WD40	U-box	0.9254402401	0.0452541227	0.0227790236	0.0042046011	4.22E-04	2.19E-05	3.79E-05	0
OG0000209	Ank_2	HECT	2.49E-05	6.26E-04	1.21E-04	0.5112218066	0.0501088865	2.03E-03	1.17E-01	1
OG0000209	C2	HECT	1.41E-08	7.37E-11	1.48E-12	2.71E-06	6.62E-04	1.20E-01	6.58E-01	1
OG0000209	C2	WW	5.10E-08	2.25E-10	6.47E-12	4.95E-06	0.001092708	1.34E-01	6.52E-01	1
OG0000209	DUF4414	HECT	0.0045748622	2.02E-06	3.47E-08	1.30E-06	1.72E-07	3.17E-07	8.04E-04	1
OG0000209	DUF908	DUF4414	1.55E-04	2.12E-06	7.71E-06	1.20E-05	9.68E-04	3.89E-05	1.01E-01	1
OG0000209	DUF908	DUF913	1.55E-04	2.10E-06	6.85E-06	7.25E-08	6.98E-06	1.06E-08	6.37E-06	1
OG0000209	DUF908	HECT	4.59E-03	2.10E-06	6.90E-06	6.27E-07	9.67E-04	3.88E-05	1.01E-01	1
OG0000209	DUF908	UBA	1.55E-04	2.11E-06	6.86E-06	8.30E-08	2.48E-05	7.32E-07	2.14E-05	1
OG0000209	DUF913	DUF4414	1.55E-04	2.03E-06	3.48E-08	1.43E-06	1.14E-05	3.86E-05	1.00E-01	1
OG0000209	DUF913	HECT	0.0045793673	2.02E-06	3.42E-08	7.45E-08	1.14E-05	3.85E-05	1.00E-01	1
OG0000209	DUF913	UBA	1.55E-04	2.11E-06	6.86E-06	8.30E-08	2.48E-05	7.32E-07	2.14E-05	1
OG0000209	UBA	DUF4414	1.55E-04	2.14E-06	9.83E-06	4.21E-05	3.69E-03	1.49E-04	8.61E-03	1
OG0000209	UBA	HECT	0.004585403	2.10E-06	7.02E-06	2.20E-06	0.0036861884	1.49E-04	8.61E-03	1
OG0000209	WW	HECT	2.55E-10	3.26E-12	2.02E-15	2.84E-09	2.07E-05	9.01E-02	6.69E-01	1
OG0000210	Glyco_tran_10_N	Glyco_transf_10	0.3744295444	0.0792288844	0.0446399686	0.0083019104	0.0272595308	1.11E-03	1.26E-01	1
OG0000211	dDENN	PLAT	2.73E-05	6.24E-04	0.0596545896	0.8460527223	0.0829967081	3.36E-03	5.76E-03	1
OG0000211	dDENN	RUN	1.22E-05	1.59E-04	0.0305821274	0.8723355993	0.0858847498	3.48E-03	5.98E-03	1
OG0000211	DENN	dDENN	1.81E-07	7.92E-10	1.33E-11	5.10E-08	6.64E-09	1.69E-09	3.29E-06	1
OG0000211	DENN	PLAT	2.73E-05	6.24E-04	0.0596545896	0.8460527223	0.0829967081	3.36E-03	5.76E-03	1
OG0000211	DENN	RUN	7.41E-06	1.22E-05	0.0021768045	0.0620017279	0.828819177	3.36E-02	5.80E-02	1
OG0000211	PLAT	RUN	2.88E-04	6.24E-04	0.0596469705	0.8459064721	0.082981902	3.36E-03	5.76E-03	1
OG0000211	RUN	PLAT	2.73E-05	6.23E-04	0.0596523713	8.46E-01	8.30E-02	3.36E-03	5.76E-03	1
OG0000211	uDENN	dDENN	7.98E-07	2.55E-09	3.48E-11	5.57E-08	7.13E-09	1.81E-09	3.59E-06	1
OG0000211	uDENN	DENN	6.53E-11	0.00E+00	0.00E+00	0.00E+00	1.03E-15	1.46E-14	1.28E-07	1
OG0000211	uDENN	PLAT	2.53E-05	6.22E-04	5.96E-02	8.45E-01	8.29E-02	3.35E-03	5.75E-03	1
OG0000211	uDENN	RUN	7.44E-06	1.23E-05	2.18E-03	6.20E-02	8.29E-01	3.36E-02	5.80E-02	1
OG0000213	Beta-TrCP_D	F-box-like	9.27E-01	4.57E-02	2.30E-02	4.25E-03	4.27E-04	2.21E-05	3.83E-05	0
OG0000213	Beta-TrCP_D	WD40	9.27E-01	4.56E-02	2.30E-02	4.24E-03	4.25E-04	2.20E-05	3.82E-05	0
OG0000213	F-box-like	WD40	3.45E-11	0.00E+00	0.00E+00	0.00E+00	0.00E+00	9.18E-10	4.43E-01	1
OG0000213	F-box	WD40	3.29E-04	7.50E-04	1.81E-04	7.96E-01	1.79E-01	7.27E-03	1.25E-02	1
OG0000214	Cullin	Cullin_Nedd8	2.04E-14	0.00E+00	0.00E+00	0.00E+00	0.00E+00	2.52E-14	4.05E-09	1
OG0000215	TPR_11	Glyco_transf_41	7.23E-06	2.11E-06	7.16E-06	4.27E-06	4.96E-05	1.73E-06	5.96E-04	1
OG0000215	TPR_11	TPR_1	0.0026601992	0.0075975931	0.0036183172	5.67E-04	9.81E-08	6.68E-08	2.86E-06	1
OG0000215	TPR_11	TPR_12	3.26E-02	1.38E-03	5.03E-04	7.09E-03	5.79E-04	2.33E-05	7.59E-04	1
OG0000215	TPR_12	Glyco_transf_41	1.27E-02	4.00E-04	7.47E-06	9.29E-06	6.10E-04	2.44E-05	7.96E-04	1
OG0000215	TPR_12	TPR_11	5.16E-01	2.51E-02	0.0125290694	0.0022691534	1.73E-04	8.84E-06	5.05E-04	1
OG0000215	TPR_1	Glyco_transf_41	0.009183869	2.84E-01	0.1425043811	0.0260499791	0.0053247161	2.17E-04	3.61E-04	1
OG0000215	TPR_1	TPR_11	0.0116346967	0.0166304801	0.0081539434	0.0013999492	2.27E-05	6.72E-07	1.58E-06	1
OG0000217	Ldl_recept_a	MAM	0.7679427854	0.1395937712	0.0767298257	0.0142906813	1.41E-03	6.19E-05	1.07E-04	1
OG0000217	MAM	Ldl_recept_a	0.7570592099	1.46E-01	8.06E-02	1.50E-02	1.48E-03	6.49E-05	1.12E-04	1
OG0000218	Ldl_recept_a	7tm_1	0.8965838711	0.0516304483	0.0262673032	0.0048519947	4.85E-04	2.44E-05	4.23E-05	1
OG0000219	GPHH	Ca_chan_IQ	1.39E-01	5.31E-01	2.75E-01	5.06E-02	4.97E-03	2.06E-04	3.53E-04	1
OG0000219	Ion_trans	Ca_chan_IQ	1.39E-01	5.30E-01	2.74E-01	5.05E-02	4.96E-03	2.05E-04	3.52E-04	1
OG0000219	Ion_trans	GPHH	7.69E-06	2.68E-04	3.55E-07	1.19E-03	2.30E-05	2.57E-04	4.77E-04	1
OG0000220	Acyl-CoA_dh_1	ACOX	2.44E-04	1.10E-08	1.69E-11	9.05E-11	1.87E-08	1.03E-10	3.71E-07	1
OG0000220	Acyl-CoA_dh_M	ACOX	2.91E-09	1.01E-13	0.00E+00	0.00E+00	0.00E+00	4.41E-15	1.09E-08	1
OG0000220	Acyl-CoA_dh_M	Acyl-CoA_dh_1	3.03E-04	1.22E-08	1.61E-11	7.82E-11	1.55E-08	7.87E-11	3.11E-07	1
OG0000220	Acyl-CoA_ox_N	ACOX	9.65E-08	1.08E-08	2.74E-10	3.17E-12	9.70E-13	3.77E-10	1.61E-04	1
OG0000220	Acyl-CoA_ox_N	Acyl-CoA_dh_1	0.0123417318	3.85E-04	4.09E-06	1.04E-06	1.69E-03	6.87E-05	1.95E-01	1
OG0000220	Acyl-CoA_ox_N	Acyl-CoA_dh_M	1.25E-06	1.56E-08	6.79E-10	6.30E-12	1.93E-12	5.45E-10	1.92E-04	1
OG0000223	EF-hand_7	C2	0.010232701	0.0299383718	0.0148399441	2.63E-03	4.80E-04	1.65E-03	2.82E-03	1
OG0000223	EF-hand_7	EF-hand_like	0.0548611796	0.161481441	0.0809042933	0.0147588655	0.0032460671	1.12E-02	1.92E-02	1
OG0000223	EF-hand_7	PI-PLC-X	1.02E-02	2.99E-02	0.0148399441	0.0026275432	4.80E-04	1.65E-03	0.002823878	1
OG0000223	EF-hand_7	PI-PLC-Y	0.010232701	2.99E-02	0.0148399441	0.0026275432	4.80E-04	0.0016544537	0.002823878	1
OG0000223	EF-hand_like	C2	3.95E-11	2.22E-12	3.89E-13	2.54E-08	7.52E-09	4.32E-08	3.68E-04	1
OG0000223	EF-hand_like	PI-PLC-X	2.88E-13	4.35E-14	2.30E-14	1.25E-08	2.61E-09	3.77E-09	2.78E-05	1
OG0000223	EF-hand_like	PI-PLC-Y	7.43E-12	1.95E-13	5.06E-14	1.57E-08	3.12E-09	4.12E-09	2.84E-05	1
OG0000223	EF-hand_like	SH2	7.76E-05	5.35E-06	3.17E-04	0.9000702646	0.0883047104	0.0035729738	0.0061250171	0
OG0000223	EF-hand_like	SH3_1	0.0046580571	5.33E-06	3.17E-04	9.00E-01	8.83E-02	3.57E-03	6.12E-03	0
OG0000223	PH_12	C2	1.01E-04	8.17E-05	2.37E-02	3.45E-01	5.59E-01	2.27E-02	3.91E-02	1
OG0000223	PH_12	EF-hand_like	0.0476459692	0.0021246033	0.6230138412	0.1164013336	1.89E-01	7.64E-03	1.31E-02	1
OG0000223	PH_12	PI-PLC-X	1.00E-04	8.12E-05	2.37E-02	0.3445705561	0.5595120257	0.0226986712	0.0390989707	1
OG0000223	PH_12	PI-PLC-Y	1.01E-04	8.17E-05	0.0237444606	0.3446432905	0.5594273972	0.0226866567	3.91E-02	1
OG0000223	PI-PLC-X	C2	3.75E-13	1.98E-14	9.69E-15	2.78E-10	1.13E-09	1.01E-09	1.63E-06	1
OG0000223	PI-PLC-X	PI-PLC-Y	0	0	0.00E+00	4.28E-13	1.06E-11	2.89E-10	6.89E-07	1
OG0000223	PI-PLC-X	SH2	7.60E-05	4.10E-06	1.99E-04	0.9001427176	0.0883432842	3.58E-03	6.13E-03	0
OG0000223	PI-PLC-X	SH3_1	4.63E-03	5.33E-06	3.17E-04	0.9000124641	0.0882956124	0.0035725288	0.0061240827	0
OG0000223	PI-PLC-Y	C2	1.37E-12	2.24E-14	1.01E-14	2.75E-10	1.11E-09	1.00E-09	1.63E-06	1
OG0000223	SH2	C2	7.56E-05	4.54E-06	6.86E-04	0.8995497442	0.0884182405	0.0035812773	6.15E-03	1
OG0000223	SH2	PI-PLC-Y	7.22E-05	1.30E-06	1.94E-04	9.00E-01	8.88E-02	3.60E-03	6.20E-03	1
OG0000223	SH2	SH3_1	4.66E-03	5.33E-06	3.17E-04	9.00E-01	8.83E-02	3.57E-03	6.12E-03	0
OG0000223	SH3_1	C2	4.66E-03	9.13E-06	6.95E-04	8.99E-01	8.82E-02	3.57E-03	6.12E-03	1
OG0000223	SH3_1	PI-PLC-Y	4.66E-03	9.13E-06	6.95E-04	8.99E-01	8.82E-02	3.57E-03	6.12E-03	1
OG0000224	BET	BRD4_CDT	9.23E-01	4.50E-02	2.26E-02	4.18E-03	4.19E-04	2.18E-05	3.78E-05	0
OG0000224	Bromodomain	BET	2.75E-06	3.65E-07	1.56E-09	4.51E-09	2.74E-09	1.80E-09	2.12E-06	1
OG0000224	Bromodomain	BRD4_CDT	9.23E-01	4.50E-02	2.27E-02	4.18E-03	4.20E-04	2.18E-05	3.78E-05	0
OG0000225	Inhibitor_I9	Peptidase_S8	0.0899630106	4.21E-03	1.95E-03	2.76E-04	7.33E-02	2.59E-01	4.69E-01	1
OG0000226	Meis_PKNOX_N	Homeobox_KN	8.36E-01	4.32E-02	2.18E-02	4.04E-03	4.05E-04	2.12E-05	3.68E-05	1
OG0000227	Glyco_hydro_3_C	Fn3-like	2.96E-10	1.22E-09	5.78E-11	3.50E-10	1.12E-10	1.22E-09	1.30E-04	1
OG0000227	Glyco_hydro_3	Fn3-like	3.67E-10	1.65E-09	8.76E-11	5.67E-10	1.90E-10	2.22E-09	1.48E-04	1
OG0000227	Glyco_hydro_3	Glyco_hydro_3_C	3.42E-11	2.27E-10	4.28E-12	5.33E-11	1.97E-11	2.85E-10	6.08E-05	1
OG0000228	Chorein_N	SHR-BD	7.48E-08	7.30E-10	7.40E-13	5.06E-11	1.70E-11	3.08E-09	1.48E-06	1
OG0000228	Chorein_N	VPS13	6.26E-09	7.03E-11	3.55E-14	1.05E-11	3.19E-12	2.77E-10	1.38E-07	1
OG0000228	Chorein_N	VPS13_C	1.87E-07	7.27E-09	4.34E-11	1.87E-10	3.87E-11	2.32E-09	3.57E-07	1
OG0000228	Chorein_N	VPS13_mid_rpt	3.77E-07	6.47E-09	1.35E-10	7.10E-10	4.12E-10	4.06E-09	7.53E-07	1
OG0000228	SHR-BD	ATG_C	4.11E-04	3.77E-04	3.28E-08	1.12E-06	1.89E-08	1.11E-07	3.07E-05	1
OG0000228	SHR-BD	VPS13_C	1.14E-08	7.33E-10	5.75E-12	4.92E-11	8.42E-12	2.82E-10	1.06E-06	1
OG0000228	VPS13	ATG_C	4.01E-04	3.70E-04	3.18E-08	1.04E-06	1.29E-08	3.20E-08	6.75E-06	1
OG0000228	VPS13_C	ATG_C	3.97E-04	3.62E-04	1.94E-08	9.94E-07	1.20E-08	2.54E-08	2.46E-06	1
OG0000228	VPS13_mid_rpt	ATG_C	4.13E-04	3.84E-04	3.41E-08	1.25E-06	5.21E-08	9.98E-08	2.08E-05	1
OG0000228	VPS13_mid_rpt	SHR-BD	1.98E-07	6.55E-09	1.85E-10	1.21E-09	8.64E-10	1.67E-08	3.32E-06	1
OG0000228	VPS13_mid_rpt	VPS13_C	1.33E-06	2.68E-07	6.26E-09	2.06E-08	9.40E-09	2.43E-08	2.05E-06	1
OG0000228	VPS13	SHR-BD	3.35E-08	4.06E-10	4.43E-13	3.80E-11	1.29E-11	2.77E-09	1.52E-06	1
OG0000228	VPS13	VPS13_C	9.94E-08	4.83E-09	3.16E-11	1.60E-10	3.54E-11	2.42E-09	5.00E-07	1
OG0000228	VPS13	VPS13_mid_rpt	4.27E-08	1.28E-09	4.32E-11	4.40E-10	3.01E-10	3.88E-09	7.45E-07	1
OG0000229	SWIRM	Amino_oxidase	0.0098967199	3.93E-04	7.07E-06	3.86E-06	2.32E-04	9.11E-06	1.02E-03	1
OG0000231	GPS	PLAT	4.74E-01	2.97E-02	1.51E-02	4.28E-01	4.20E-02	1.70E-03	2.92E-03	1
OG0000231	PLAT	PKD_channel	0.4623561189	3.03E-02	1.55E-02	4.39E-01	4.31E-02	1.75E-03	3.00E-03	1
OG0000231	REJ	GPS	0.5108424073	0.0273209643	0.0137512379	0.3894152046	0.0382214934	1.55E-03	2.66E-03	1
OG0000231	REJ	PLAT	4.91E-01	2.86E-02	1.45E-02	4.10E-01	4.03E-02	1.63E-03	2.80E-03	1
OG0000232	C1_1	PH_13	8.85E-01	4.39E-02	2.21E-02	4.08E-03	4.10E-04	2.14E-05	3.71E-05	1
OG0000232	C1_1	RhoGEF	5.83E-04	1.63E-03	1.58E-01	7.56E-01	7.42E-02	3.00E-03	5.15E-03	1
OG0000232	PDZ	C1_1	1.68E-01	5.13E-01	2.59E-01	4.75E-02	4.66E-03	1.93E-04	3.32E-04	1
OG0000232	PDZ	PH_13	8.86E-01	4.46E-02	2.25E-02	4.15E-03	4.17E-04	2.17E-05	3.76E-05	1
OG0000232	PDZ	RGS-like	1.60E-01	5.17E-01	2.62E-01	0.0481736794	4.73E-03	1.96E-04	3.36E-04	1
OG0000232	PDZ	RhoGEF	0.1604560257	5.17E-01	0.2624881474	0.0481736794	0.0047337626	1.96E-04	3.36E-04	1
OG0000232	RGS-like	C1_1	0.0028322835	0.0084997512	0.8211098501	0.1508161589	1.48E-02	6.03E-04	1.03E-03	1
OG0000232	RGS-like	PH_13	0.8864129442	0.0452126607	0.0228236562	4.21E-03	4.23E-04	2.19E-05	3.80E-05	1
OG0000232	RGS-like	RhoGEF	1.83E-04	3.87E-04	0.0375220407	8.66E-01	8.50E-02	3.44E-03	5.90E-03	1
OG0000232	RhoGEF	PH_13	2.32E-05	1.27E-06	1.35E-04	5.00E-04	0.8800075099	3.67E-02	0.0652807202	1
OG0000233	GTP_EFTU_D2	GTP_EFTU_D3	8.93E-10	9.75E-11	2.84E-13	2.40E-13	5.11E-12	1.74E-11	3.17E-08	1
OG0000233	GTP_EFTU	GTP_EFTU_D2	9.41E-10	9.96E-11	9.19E-14	2.01E-13	5.69E-12	1.83E-11	2.93E-08	1
OG0000233	GTP_EFTU	GTP_EFTU_D3	6.28E-14	0.00E+00	0	0	0	3.43E-15	1.06E-09	1
OG0000233	HBS1_N	GTP_EFTU	0.0045195813	2.08E-06	7.70E-06	0.0098615056	0.877682561	0.0354854933	0.0608629124	1
OG0000233	HBS1_N	GTP_EFTU_D3	0.0045195813	2.08E-06	7.70E-06	0.0098615056	0.877682561	0.0354854933	0.0608629124	1
OG0000239	Tubulin	Tubulin_C	1.44E-10	1.93E-10	1.04E-11	6.35E-11	1.75E-10	2.86E-10	4.98E-08	1
OG0000240	Rtf2	Pro_isomerase	1.96E-05	3.90E-04	3.49E-08	1.55E-06	2.16E-05	6.02E-07	8.64E-04	1
OG0000242	ADAM_spacer1	TSP_1	0.8801511698	0.0734892141	0.0382627458	7.08E-03	7.04E-04	3.33E-05	5.75E-05	1
OG0000242	Pep_M12B_propep	ADAM_spacer1	0.8770450996	7.54E-02	3.92E-02	7.25E-03	7.21E-04	3.40E-05	5.87E-05	1
OG0000242	Pep_M12B_propep	Reprolysin	8.50E-01	9.16E-02	4.83E-02	8.95E-03	8.88E-04	4.07E-05	7.02E-05	1
OG0000242	Pep_M12B_propep	TSP_1	0.8699332513	0.0797083946	0.0416226299	7.70E-03	7.65E-04	3.57E-05	6.17E-05	1
OG0000242	Reprolysin	ADAM_spacer1	0.8671671706	0.0814594563	0.0425762082	0.0078789141	7.82E-04	3.64E-05	6.29E-05	1
OG0000242	Reprolysin	TSP_1	0.8564914752	0.0878375329	0.0461920726	0.0085539199	8.49E-04	3.91E-05	6.75E-05	1
OG0000242	TSP_1	ADAM_spacer1	0.8496710876	0.0918839876	0.0485136464	0.0089881364	8.91E-04	4.08E-05	7.05E-05	1
OG0000244	HHH_5	Rad51	0.0044865569	2.02E-06	2.41E-08	1.98E-06	6.08E-05	2.19E-06	8.11E-04	1
OG0000247	CRAL_TRIO	Motile_Sperm	2.99E-03	8.56E-03	8.21E-01	1.51E-01	1.48E-02	6.02E-04	1.03E-03	1
OG0000250	CPT_N	Carn_acyltransf	9.24E-01	4.64E-02	2.34E-02	4.32E-03	4.33E-04	2.23E-05	3.87E-05	0
OG0000251	Anoct_dimer	Anoctamin	1.70E-07	1.06E-07	7.73E-08	9.76E-04	1.44E-01	9.12E-03	0.0232097287	1
OG0000255	LRR_8	Exo_endo_phos	1.98E-05	3.91E-04	7.99E-07	9.35E-04	0.0845215729	0.2879135219	0.4954860764	1
OG0000256	PHM7_cyt	RSN1_7TM	3.18E-06	2.02E-07	3.62E-11	6.66E-10	3.18E-10	5.48E-09	2.66E-04	1
OG0000256	RSN1_TM	PHM7_cyt	3.13E-06	2.07E-07	4.35E-11	8.16E-10	3.72E-10	5.90E-09	2.72E-04	1
OG0000256	RSN1_TM	RSN1_7TM	2.26E-07	7.46E-10	0	3.01E-15	1.67E-14	2.53E-12	1.67E-07	1
OG0000257	Calpain_III	C2	6.84E-01	0.0336747125	0.016907409	0.2414259071	0.0236861945	9.62E-04	0.0016487174	1
OG0000257	Calpain_III	EF-hand_8	0.884203418	0.043209907	0.0217540711	4.02E-03	4.03E-04	2.11E-05	3.67E-05	1
OG0000257	Peptidase_C2	C2	0.6844419324	0.0336747125	0.016907409	0.2414259071	2.37E-02	9.62E-04	1.65E-03	1
OG0000257	Peptidase_C2	Calpain_III	0.0027233254	2.61E-04	2.38E-07	7.75E-04	1.87E-08	2.56E-07	8.91E-07	1
OG0000257	Peptidase_C2	EF-hand_8	0.884203418	0.043209907	0.0217540711	0.0040169958	4.03E-04	2.11E-05	3.67E-05	1
OG0000257	zf-RanBP	Peptidase_C2	0.9221929667	0.0449558141	0.0226247261	0.0041762028	4.19E-04	2.18E-05	3.77E-05	0
OG0000258	Laminin_B	Laminin_EGF	7.92E-01	1.26E-01	0.0683945856	1.27E-02	1.26E-03	5.56E-05	9.59E-05	1
OG0000258	Laminin_B	Laminin_G_2	0.9186221875	0.0466880386	0.0235586678	0.0043491504	4.36E-04	2.24E-05	3.89E-05	0
OG0000258	Laminin_EGF	Laminin_B	0.7819564112	0.1315725465	0.0717797414	0.0133543072	0.0013201645	5.82E-05	1.00E-04	1
OG0000258	Laminin_EGF	Laminin_G_2	0.9102452933	0.0556664377	0.0283852856	0.0052424884	5.24E-04	2.60E-05	4.50E-05	0
OG0000258	Laminin_N	Laminin_B	0.8979467248	0.0627106763	0.0322442496	5.96E-03	5.94E-04	2.88E-05	4.99E-05	1
OG0000258	Laminin_N	Laminin_EGF	0.0250487597	0.53915102	0.3594412793	6.88E-02	6.77E-03	2.79E-04	4.79E-04	1
OG0000261	P4Ha_N	2OG-FeII_Oxy	0.9206352249	0.0491716319	0.0248860769	4.59E-03	4.60E-04	2.34E-05	4.06E-05	0
OG0000261	P4Ha_N	2OG-FeII_Oxy_3	0.0169440925	0.6078178963	0.3111852131	0.0571871929	0.0056182075	2.32E-04	3.98E-04	1
OG0000262	Pkinase	PH_3	7.40E-05	1.95E-06	2.04E-08	2.38E-07	7.69E-08	8.50E-09	3.94E-06	1
OG0000263	C2	Myotub-related	2.76E-04	0.008323714	0.7988247353	1.46E-01	1.44E-02	5.85E-04	1.00E-03	1
OG0000263	GRAM	Myotub-related	0.0012051035	0.0033255054	0.6434672627	0.1192969612	1.17E-02	4.76E-04	8.12E-04	1
OG0000263	Myotub-related	FYVE	5.42E-05	1.74E-06	1.76E-04	3.00E-01	2.95E-02	1.02E-01	1.77E-01	1
OG0000264	Dynamin_N	EF-hand_4	1.05E-04	1.88E-06	6.86E-08	1.26E-06	6.86E-07	2.09E-06	5.48E-03	1
OG0000264	EHD_N	Dynamin_N	9.91E-05	1.85E-06	6.77E-08	1.22E-06	1.52E-07	2.60E-07	6.70E-04	1
OG0000264	EHD_N	EF-hand_4	5.80E-06	1.91E-06	6.77E-08	6.60E-08	2.93E-07	7.43E-07	1.94E-03	1
OG0000267	C8	TIL	0.8646109223	8.16E-02	4.27E-02	7.91E-03	7.85E-04	3.66E-05	6.31E-05	1
OG0000267	C8	VWD	0.8571723591	0.087530501	0.0459572018	0.0085082527	8.44E-04	3.89E-05	6.72E-05	1
OG0000267	TIL	C8	0.8868522963	0.0657461229	0.033910545	0.0062683377	6.24E-04	3.01E-05	5.20E-05	1
OG0000267	TIL	VWD	8.87E-01	6.93E-02	3.58E-02	6.63E-03	6.59E-04	3.15E-05	5.44E-05	1
OG0000267	VWC	VWD	9.03E-01	4.63E-02	2.34E-02	4.31E-03	4.32E-04	2.23E-05	3.87E-05	0
OG0000267	VWD	C8	7.29E-01	1.61E-01	9.10E-02	1.70E-02	1.68E-03	7.28E-05	1.25E-04	1
OG0000267	VWD	TIL	8.47E-01	9.34E-02	4.94E-02	9.14E-03	9.07E-04	4.15E-05	7.15E-05	1
OG0000268	CRAL_TRIO_N	CRAL_TRIO	8.63E-07	1.76E-07	1.27E-06	1.34E-08	3.36E-08	1.12E-07	5.54E-04	1
OG0000268	PRELI	CRAL_TRIO	1.70E-02	6.14E-04	5.89E-02	8.35E-01	8.19E-02	3.32E-03	5.68E-03	1
OG0000268	PRELI	CRAL_TRIO_N	1.53E-01	7.27E-03	7.00E-01	1.28E-01	1.26E-02	5.13E-04	8.80E-04	1
OG0000270	Sulfate_transp	STAS	2.38E-09	2.25E-10	0.00E+00	0.00E+00	0.00E+00	5.60E-12	5.01E-05	1
OG0000272	FERM_C	ERM	1.87E-05	4.58E-03	8.08E-01	1.68E-01	1.66E-02	6.80E-04	1.17E-03	1
OG0000272	FERM_C	FA	8.83E-01	7.20E-02	3.74E-02	6.91E-03	6.88E-04	3.26E-05	5.64E-05	1
OG0000272	FERM_C	PDZ	8.82E-01	4.30E-02	2.17E-02	4.00E-03	4.02E-04	2.11E-05	3.65E-05	1
OG0000272	FERM_C	Y_phosphatase	8.82E-01	4.30E-02	2.16E-02	4.00E-03	4.01E-04	2.10E-05	3.65E-05	1
OG0000272	FERM_M	ERM	1.87E-05	4.58E-03	8.08E-01	1.68E-01	1.66E-02	6.80E-04	1.17E-03	1
OG0000272	FERM_M	FA	8.85E-01	7.09E-02	3.67E-02	6.80E-03	6.76E-04	3.21E-05	5.56E-05	1
OG0000272	FERM_M	FERM_C	7.28E-12	4.40E-08	1.30E-04	0.8887829247	0.0971806034	4.17E-03	7.68E-03	1
OG0000272	FERM_M	PDZ	0.882083686	4.30E-02	2.17E-02	4.00E-03	4.02E-04	2.11E-05	3.65E-05	1
OG0000272	FERM_M	Y_phosphatase	0.8820416735	0.0429999695	0.0216452963	0.0039969791	4.01E-04	2.10E-05	3.65E-05	1
OG0000272	FERM_M	zf-C3HC4_3	0.8408515593	0.0412818665	0.020794936	0.0038416676	3.86E-04	2.04E-05	3.55E-05	1
OG0000272	FERM_N	ERM	2.74E-05	4.92E-03	8.10E-01	1.67E-01	1.65E-02	6.72E-04	1.16E-03	1
OG0000272	FERM_N	FA	0.8836330044	0.0714703882	0.0370672788	0.006855051	6.82E-04	3.24E-05	5.60E-05	1
OG0000272	FERM_N	FERM_C	1.89E-09	1.99E-04	0.6948929576	0.2731767148	2.80E-02	1.16E-03	2.06E-03	1
OG0000272	FERM_N	FERM_M	9.73E-11	1.07E-05	3.96E-02	1.57E-02	1.54E-03	1.25E-02	2.64E-02	1
OG0000272	FERM_N	PDZ	8.82E-01	4.30E-02	2.17E-02	4.00E-03	4.02E-04	2.11E-05	3.65E-05	1
OG0000272	FERM_N	Y_phosphatase	8.82E-01	4.30E-02	2.16E-02	4.00E-03	4.01E-04	2.10E-05	3.65E-05	1
OG0000272	FERM_N	zf-C3HC4_3	9.21E-01	0.045539616	0.0229392383	0.0042344454	4.25E-04	2.20E-05	3.81E-05	0
OG0000272	PDZ	Y_phosphatase	8.82E-01	4.30E-02	2.16E-02	4.00E-03	4.01E-04	2.10E-05	3.65E-05	1
OG0000273	Ank_2	CAP_GLY	2.77E-01	4.01E-01	2.01E-01	3.68E-02	3.61E-03	2.54E-02	4.44E-02	1
OG0000273	CAP_GLY	CLIP1_ZNF	0.0045912143	2.16E-06	1.23E-05	0.015756571	8.72E-01	3.53E-02	6.05E-02	1
OG0000273	Ubiquitin_2	CAP_GLY	7.31E-05	9.71E-07	2.07E-08	7.19E-08	8.46E-06	7.56E-08	6.24E-06	1
OG0000274	AMP-binding	AMP-binding_C	5.13E-09	9.87E-10	2.94E-14	3.18E-12	2.80E-10	7.48E-12	2.47E-07	1
OG0000275	HIRAN	Helicase_C	7.03E-06	1.97E-06	3.37E-08	2.70E-06	3.25E-04	1.31E-05	7.59E-04	1
OG0000275	HIRAN	SNF2_N	7.04E-06	1.97E-06	3.37E-08	2.70E-06	3.25E-04	1.31E-05	7.59E-04	1
OG0000275	SNF2_N	Helicase_C	4.25E-09	1.01E-13	0.00E+00	0	0	6.80E-14	8.46E-08	1
OG0000275	zf-C3HC4_3	Helicase_C	6.18E-06	8.04E-07	1.70E-08	7.95E-07	3.05E-06	1.10E-05	6.98E-04	1
OG0000276	Kazal_1	Kazal_2	9.07E-03	3.76E-04	2.51E-07	7.96E-04	1.05E-02	4.26E-04	7.11E-04	1
OG0000276	Kazal_2	Kazal_1	0.0070264941	3.68E-04	1.64E-07	3.86E-04	1.01E-02	4.09E-04	6.87E-04	1
OG0000283	HMG_box	SOXp	0.9199701742	0.0454016965	0.0228673493	0.0042212037	4.23E-04	2.19E-05	3.80E-05	0
OG0000287	DEP	G-gamma	1.20E-01	5.86E-03	0.5654367372	0.1036650427	0.1678493845	0.0067877606	0.0116369573	1
OG0000287	DEP	RGS	4.38E-03	2.36E-06	3.40E-05	1.54E-01	2.50E-01	1.01E-02	0.0174513735	1
OG0000287	G-gamma	RGS	1.18E-01	5.96E-03	5.76E-01	1.06E-01	1.71E-01	6.92E-03	1.19E-02	1
OG0000287	PDZ	RGS	0.0197012414	6.11E-01	0.3065859158	5.62E-02	0.0055161725	2.28E-04	3.91E-04	1
OG0000289	Syja_N	hSac2	2.71E-03	7.72E-03	3.68E-03	5.78E-04	5.14E-02	2.08E-03	7.39E-01	1
OG0000290	AAA	Peptidase_M41	2.14E-12	6.09E-14	0	0	0.00E+00	2.02E-12	3.04E-08	1
OG0000290	FtsH_ext	AAA	1.88E-05	8.79E-07	8.79E-09	6.78E-07	9.91E-06	3.24E-07	6.33E-04	1
OG0000290	FtsH_ext	Peptidase_M41	1.88E-05	8.79E-07	8.79E-09	6.78E-07	9.95E-06	3.26E-07	6.37E-04	1
OG0000291	DCB	DUF1981	6.12E-06	1.47E-06	1.39E-08	4.26E-08	6.33E-08	4.96E-08	2.71E-06	1
OG0000291	DCB	Sec7	6.03E-06	1.42E-06	1.33E-08	4.08E-08	6.03E-08	4.73E-08	2.32E-06	1
OG0000291	DCB	Sec7_N	6.11E-06	1.48E-06	1.44E-08	5.95E-07	6.57E-08	4.99E-08	2.36E-06	1
OG0000291	Sec7	DUF1981	4.35E-06	5.52E-07	1.92E-09	4.08E-09	6.03E-09	7.57E-09	1.33E-06	1
OG0000291	Sec7	IQ_SEC7_PH	7.58E-05	4.08E-06	1.98E-04	9.00E-01	0.088708226	3.60E-03	6.19E-03	1
OG0000291	Sec7_N	DUF1981	5.32E-06	1.05E-06	8.52E-09	2.55E-08	3.44E-08	1.76E-08	1.66E-06	1
OG0000291	Sec7_N	Sec7	4.63E-06	7.91E-07	5.38E-09	1.55E-08	1.88E-08	2.34E-09	7.45E-07	1
OG0000291	Sec7	PH	6.59E-05	7.12E-06	5.23E-04	7.48E-06	8.88E-07	9.10E-06	2.89E-02	1
OG0000293	Acyl_transf_1	KR	8.42E-04	2.82E-03	1.27E-03	1.42E-04	6.10E-08	5.96E-09	1.29E-05	1
OG0000293	Acyl_transf_1	PP-binding	6.78E-04	0.0027348822	0.0012463371	1.37E-04	7.12E-08	9.04E-09	1.38E-05	1
OG0000293	Acyl_transf_1	PS-DH	0.0249206987	1.33E-03	4.93E-04	1.31E-06	1.27E-07	2.30E-07	0.0011817683	1
OG0000293	KAsynt_C_assoc	Acyl_transf_1	5.68E-04	0.0012431228	4.85E-04	1.60E-06	1.36E-07	2.59E-07	1.19E-03	1
OG0000293	KAsynt_C_assoc	KR	1.19E-03	3.99E-03	1.86E-03	2.50E-04	1.43E-07	2.73E-07	1.22E-03	1
OG0000293	KAsynt_C_assoc	PP-binding	1.25E-03	4.24E-03	1.99E-03	2.71E-04	1.88E-07	3.96E-07	1.30E-03	1
OG0000293	KAsynt_C_assoc	PS-DH	2.57E-02	1.35E-03	5.04E-04	1.66E-06	1.44E-07	2.72E-07	1.22E-03	1
OG0000293	ketoacyl-synt	Acyl_transf_1	2.06E-05	1.12E-03	4.49E-04	1.19E-06	5.50E-08	4.97E-09	1.00E-05	1
OG0000293	Ketoacyl-synt_C	Acyl_transf_1	2.46E-05	1.17E-03	4.60E-04	1.22E-06	5.62E-08	5.07E-09	1.01E-05	1
OG0000293	Ketoacyl-synt_C	KAsynt_C_assoc	2.59E-05	1.22E-03	4.80E-04	1.58E-06	1.35E-07	2.56E-07	0.0011865843	1
OG0000293	Ketoacyl-synt_C	KR	5.99E-05	2.43E-03	1.16E-03	1.32E-04	5.61E-08	3.75E-09	2.74E-06	1
OG0000293	Ketoacyl-synt_C	PP-binding	6.13E-05	0.0025068838	0.0012007177	1.33E-04	6.83E-08	5.95E-09	2.99E-06	1
OG0000293	Ketoacyl-synt_C	PS-DH	2.51E-02	1.33E-03	4.93E-04	1.31E-06	6.08E-08	4.42E-09	4.81E-06	1
OG0000293	ketoacyl-synt	KAsynt_C_assoc	2.72E-05	1.23E-03	4.83E-04	1.59E-06	1.36E-07	2.58E-07	0.0011892985	1
OG0000293	ketoacyl-synt	Ketoacyl-synt_C	1.25E-06	2.01E-04	1.21E-04	2.32E-07	1.35E-08	8.65E-10	6.19E-07	1
OG0000293	ketoacyl-synt	KR	6.18E-05	0.00245837	0.0011707602	1.33E-04	5.64E-08	3.77E-09	2.74E-06	1
OG0000293	ketoacyl-synt	PP-binding	4.76E-05	0.0023244321	0.001164198	1.30E-04	6.67E-08	5.81E-09	2.96E-06	1
OG0000293	ketoacyl-synt	PS-DH	0.0257377496	0.0013305306	4.94E-04	1.31E-06	6.09E-08	4.43E-09	4.81E-06	1
OG0000293	KR	PP-binding	6.51E-05	2.67E-03	1.29E-03	1.50E-04	6.83E-08	5.95E-09	2.95E-06	1
OG0000293	PS-DH	KR	5.02E-02	2.77E-03	1.23E-03	1.39E-04	6.01E-08	4.51E-09	4.85E-06	1
OG0000293	PS-DH	PP-binding	4.97E-02	2.75E-03	1.22E-03	1.34E-04	7.03E-08	6.85E-09	5.20E-06	1
OG0000295	Cyt-b5	FAD_binding_6	9.04E-03	2.20E-04	2.10E-02	3.75E-03	2.53E-04	8.68E-04	2.92E-02	1
OG0000295	Cyt-b5	NAD_binding_1	6.37E-03	8.94E-05	8.41E-03	1.44E-03	2.43E-05	8.33E-05	0.0297157573	1
OG0000295	FAD_binding_6	NAD_binding_1	9.04E-03	2.20E-04	2.10E-02	3.75E-03	2.53E-04	8.68E-04	0.0291511717	1
OG0000298	Cu-oxidase_3	Cu-oxidase	2.16E-06	1.34E-04	2.01E-05	1.76E-07	2.30E-05	1.35E-04	3.53E-04	1
OG0000298	Cu-oxidase_3	Cu-oxidase_2	2.73E-06	1.49E-04	2.18E-05	1.90E-07	2.48E-05	1.39E-04	3.55E-04	1
OG0000298	Cu-oxidase	Cu-oxidase_2	1.79E-06	1.21E-04	1.85E-05	1.55E-07	2.02E-05	1.24E-04	3.32E-04	1
OG0000302	Arm	Arm_3	1.29E-08	5.54E-09	2.75E-12	2.90E-10	8.39E-10	5.93E-10	6.34E-07	1
OG0000302	IBB	Arm	1.19E-09	1.91E-10	3.55E-13	2.25E-10	6.85E-10	6.00E-10	1.55E-06	1
OG0000302	IBB	Arm_3	1.16E-07	2.69E-08	1.16E-11	4.43E-10	1.23E-09	8.61E-10	1.71E-06	1
OG0000303	Peptidase_M13_N	Peptidase_M13	1.91E-05	1.56E-04	1.35E-06	1.10E-06	1.53E-04	7.51E-06	1.20E-03	1
OG0000304	DEAD	HA2	4.07E-12	4.41E-13	0.00E+00	5.76E-15	7.62E-14	4.02E-09	1.40E-04	1
OG0000304	DEAD	Helicase_C	8.11E-12	6.02E-13	0	5.36E-15	7.49E-14	4.33E-09	1.53E-04	1
OG0000304	DEAD	OB_NTP_bind	1.20E-10	8.95E-12	2.64E-15	5.22E-11	1.03E-10	1.79E-08	3.42E-04	1
OG0000304	DEAD	TUDOR	9.20E-01	4.49E-02	2.26E-02	4.17E-03	4.18E-04	2.17E-05	3.77E-05	0
OG0000304	dsrm	DEAD	0.0024729031	0.0070489701	0.6761878365	0.1239257181	0.0423166169	1.71E-03	0.0574091016	1
OG0000304	dsrm	HA2	1.71E-04	2.82E-04	2.69E-02	4.83E-03	2.24E-01	9.05E-03	0.3030830841	1
OG0000304	dsrm	Helicase_C	1.71E-04	2.82E-04	2.69E-02	4.83E-03	2.24E-01	9.05E-03	0.3030830841	1
OG0000304	dsrm	OB_NTP_bind	1.72E-04	2.82E-04	2.69E-02	4.83E-03	2.24E-01	9.05E-03	3.03E-01	1
OG0000304	HA2	OB_NTP_bind	1.57E-11	2.91E-12	0.00E+00	2.75E-11	5.29E-11	8.38E-09	1.67E-04	1
OG0000304	HA2	TUDOR	9.27E-01	4.53E-02	2.28E-02	4.21E-03	4.22E-04	2.19E-05	3.80E-05	0
OG0000304	Helicase_C	HA2	1.02E-12	1.59E-13	0.00E+00	0.00E+00	1.65E-14	2.13E-09	8.43E-05	1
OG0000304	Helicase_C	OB_NTP_bind	7.60E-11	6.35E-12	1.63E-15	3.38E-11	6.10E-11	8.81E-09	1.69E-04	1
OG0000304	Helicase_C	TUDOR	9.27E-01	0.0453178802	0.0228101976	0.004210283	4.22E-04	2.19E-05	3.80E-05	0
OG0000304	OB_NTP_bind	YTH	0.8820261678	0.0429750638	0.0216319838	0.0039945173	4.01E-04	2.10E-05	3.65E-05	1
OG0000305	BACK	TLD	8.65E-01	4.21E-02	0.0211939001	0.0039114168	0.0068135334	2.80E-04	4.80E-04	1
OG0000305	BTB	TLD	8.22E-01	4.00E-02	2.01E-02	0.0037140641	0.0064662147	2.66E-04	4.55E-04	1
OG0000306	Ank_2	PARP	8.43E-05	2.51E-05	2.22E-03	4.32E-02	4.13E-03	1.67E-04	4.68E-01	1
OG0000306	Ank_2	PARP_reg	0.004773026	2.38E-05	0.0022046422	0.0430392762	4.11E-03	1.66E-04	4.66E-01	1
OG0000306	Ank_2	WGR	8.38E-05	2.58E-05	0.0022794551	0.0445021215	0.0042527819	1.72E-04	4.68E-01	1
OG0000306	BRCT	PARP	2.36E-05	3.23E-06	4.67E-04	1.20E-06	3.42E-08	7.63E-09	3.16E-06	1
OG0000306	BRCT	PARP_reg	2.36E-05	3.23E-06	4.67E-04	1.20E-06	3.42E-08	7.63E-09	3.16E-06	1
OG0000306	BRCT	WGR	2.69E-05	7.36E-06	5.21E-04	1.30E-06	3.77E-08	1.13E-08	3.09E-06	1
OG0000306	PADR1	BRCT	5.37E-05	9.02E-05	0.0085339087	0.0014718021	2.64E-05	8.03E-07	2.55E-05	1
OG0000306	PADR1	PARP	6.64E-06	1.11E-05	8.90E-04	6.89E-05	7.63E-08	1.31E-08	2.43E-05	1
OG0000306	PADR1	PARP_reg	6.64E-06	1.11E-05	8.90E-04	6.89E-05	7.63E-08	1.31E-08	2.43E-05	1
OG0000306	PADR1	WGR	6.79E-06	1.12E-05	8.95E-04	6.91E-05	7.66E-08	1.32E-08	2.43E-05	1
OG0000306	PARP_reg	PARP	6.90E-12	2.60E-12	8.31E-11	2.57E-11	1.84E-13	1.48E-12	5.03E-07	1
OG0000306	WGR	PARP	1.08E-10	6.59E-11	1.05E-09	4.74E-10	1.41E-11	1.72E-11	6.87E-07	1
OG0000306	WGR	PARP_reg	1.21E-10	5.30E-11	2.07E-10	3.44E-10	1.09E-11	1.62E-11	6.83E-07	1
OG0000306	zf-PARP	BRCT	7.91E-05	1.37E-05	0.0011249049	1.09E-04	2.20E-07	4.78E-07	6.78E-06	1
OG0000306	zf-PARP	PADR1	7.05E-06	2.43E-06	4.26E-05	6.86E-05	7.62E-08	1.40E-08	2.74E-05	1
OG0000306	zf-PARP	PARP	7.20E-06	7.23E-06	5.07E-04	1.23E-06	3.00E-08	1.11E-08	2.48E-05	1
OG0000306	zf-PARP	PARP_reg	7.20E-06	7.23E-06	5.07E-04	1.23E-06	3.00E-08	1.11E-08	2.48E-05	1
OG0000306	zf-PARP	WGR	7.25E-06	7.25E-06	5.08E-04	1.23E-06	2.93E-08	6.22E-09	5.85E-06	1
OG0000307	RNA_pol_Rpb1_1	RNA_pol_Rpb1_2	7.04E-12	9.80E-14	0	0	0	3.91E-12	4.99E-08	1
OG0000307	RNA_pol_Rpb1_1	RNA_pol_Rpb1_3	7.06E-12	9.86E-14	0.00E+00	0.00E+00	0.00E+00	4.18E-12	5.69E-08	1
OG0000307	RNA_pol_Rpb1_1	RNA_pol_Rpb1_4	3.44E-11	2.92E-13	0.00E+00	0	0	4.52E-12	5.28E-08	1
OG0000307	RNA_pol_Rpb1_1	RNA_pol_Rpb1_5	1.59E-11	1.67E-13	0	0	0	4.26E-12	5.24E-08	1
OG0000307	RNA_pol_Rpb1_1	RNA_pol_Rpb1_6	7.57E-05	2.01E-06	2.12E-08	6.75E-08	9.82E-08	6.68E-08	3.09E-06	1
OG0000307	RNA_pol_Rpb1_1	RNA_pol_Rpb1_7	7.53E-05	1.99E-06	2.09E-08	6.63E-08	9.66E-08	6.62E-08	3.15E-06	1
OG0000307	RNA_pol_Rpb1_1	RNA_pol_Rpb1_R	7.63E-05	2.03E-06	3.11E-08	1.31E-06	6.92E-07	2.09E-06	6.46E-06	1
OG0000307	RNA_pol_Rpb1_2	RNA_pol_Rpb1_3	3.03E-12	4.73E-14	0	0	0	3.31E-12	4.99E-08	1
OG0000307	RNA_pol_Rpb1_2	RNA_pol_Rpb1_4	1.68E-11	1.61E-13	0	0	0	3.75E-12	4.67E-08	1
OG0000307	RNA_pol_Rpb1_2	RNA_pol_Rpb1_5	7.46E-12	8.95E-14	0.00E+00	0.00E+00	0.00E+00	3.63E-12	4.91E-08	1
OG0000307	RNA_pol_Rpb1_2	RNA_pol_Rpb1_6	7.57E-05	2.01E-06	2.12E-08	6.75E-08	9.79E-08	6.60E-08	2.80E-06	1
OG0000307	RNA_pol_Rpb1_2	RNA_pol_Rpb1_7	7.52E-05	1.99E-06	2.09E-08	6.63E-08	9.63E-08	6.54E-08	2.86E-06	1
OG0000307	RNA_pol_Rpb1_2	RNA_pol_Rpb1_R	7.63E-05	2.03E-06	3.11E-08	1.31E-06	6.92E-07	2.09E-06	6.46E-06	1
OG0000307	RNA_pol_Rpb1_3	RNA_pol_Rpb1_4	3.54E-12	6.06E-14	0.00E+00	0.00E+00	0.00E+00	3.67E-12	4.93E-08	1
OG0000307	RNA_pol_Rpb1_3	RNA_pol_Rpb1_5	1.49E-12	3.53E-14	0.00E+00	0.00E+00	0.00E+00	3.51E-12	5.18E-08	1
OG0000307	RNA_pol_Rpb1_3	RNA_pol_Rpb1_6	7.17E-06	2.01E-06	2.12E-08	6.75E-08	9.78E-08	6.60E-08	2.80E-06	1
OG0000307	RNA_pol_Rpb1_3	RNA_pol_Rpb1_7	7.13E-06	1.99E-06	2.09E-08	6.62E-08	9.62E-08	6.54E-08	2.86E-06	1
OG0000307	RNA_pol_Rpb1_3	RNA_pol_Rpb1_R	7.24E-06	2.03E-06	3.11E-08	1.31E-06	6.92E-07	2.09E-06	6.46E-06	1
OG0000307	RNA_pol_Rpb1_4	RNA_pol_Rpb1_5	4.26E-12	6.23E-14	0	0	0	3.75E-12	5.39E-08	1
OG0000307	RNA_pol_Rpb1_4	RNA_pol_Rpb1_6	7.17E-06	2.01E-06	2.12E-08	6.75E-08	9.78E-08	6.60E-08	2.80E-06	1
OG0000307	RNA_pol_Rpb1_4	RNA_pol_Rpb1_7	7.13E-06	1.99E-06	2.09E-08	6.62E-08	9.62E-08	6.54E-08	2.86E-06	1
OG0000307	RNA_pol_Rpb1_4	RNA_pol_Rpb1_R	7.24E-06	2.03E-06	3.11E-08	1.31E-06	6.92E-07	2.09E-06	6.46E-06	1
OG0000307	RNA_pol_Rpb1_5	RNA_pol_Rpb1_6	7.17E-06	2.01E-06	2.12E-08	6.75E-08	9.78E-08	6.60E-08	2.80E-06	1
OG0000307	RNA_pol_Rpb1_5	RNA_pol_Rpb1_7	7.09E-06	1.98E-06	2.08E-08	6.62E-08	9.61E-08	6.53E-08	2.86E-06	1
OG0000307	RNA_pol_Rpb1_5	RNA_pol_Rpb1_R	7.24E-06	2.03E-06	3.11E-08	1.31E-06	6.92E-07	2.09E-06	6.46E-06	1
OG0000307	RNA_pol_Rpb1_6	RNA_pol_Rpb1_7	7.14E-06	2.01E-06	2.12E-08	6.74E-08	9.78E-08	6.61E-08	2.87E-06	1
OG0000307	RNA_pol_Rpb1_6	RNA_pol_Rpb1_R	7.24E-06	2.03E-06	3.11E-08	1.31E-06	6.92E-07	2.09E-06	6.46E-06	1
OG0000307	RNA_pol_Rpb1_7	RNA_pol_Rpb1_R	7.24E-06	2.03E-06	3.11E-08	1.31E-06	6.92E-07	2.09E-06	6.46E-06	1
OG0000308	OATP	Kazal_2	8.09E-01	1.16E-01	6.25E-02	0.0116212492	0.0011499487	5.13E-05	8.84E-05	1
OG0000314	C2	Copine	2.17E-10	2.32E-10	3.01E-14	8.53E-12	1.93E-13	2.93E-12	2.72E-08	1
OG0000317	PI3Ka	C2	0.0197463036	0.611095459	0.3066214536	0.0561626599	0.0055165425	2.28E-04	3.91E-04	1
OG0000317	PI3Ka	PI3_PI4_kinase	1.45E-11	2.09E-12	7.05E-13	1.39E-12	1.80E-13	6.44E-13	5.90E-08	1
OG0000317	PI3Ka	PX	2.84E-04	8.58E-03	8.23E-01	1.51E-01	1.48E-02	6.03E-04	1.03E-03	1
OG0000317	PI3K_C2	C2	0.0197561565	6.11E-01	3.07E-01	5.62E-02	5.52E-03	2.28E-04	3.91E-04	1
OG0000317	PI3K_C2	PI3Ka	2.08E-10	4.25E-11	7.40E-12	2.13E-11	9.08E-12	1.01E-11	4.05E-07	1
OG0000317	PI3K_C2	PI3_PI4_kinase	9.87E-11	2.62E-11	5.60E-12	1.73E-11	7.62E-12	9.49E-12	5.63E-07	1
OG0000317	PI3K_C2	PX	2.84E-04	0.0085798844	0.823468673	0.1509713137	0.0148141786	6.03E-04	0.0010343361	1
OG0000317	PI3K_p85B	PI3Ka	5.33E-03	8.40E-03	8.19E-01	1.51E-01	1.48E-02	6.03E-04	0.0010336751	1
OG0000317	PI3K_p85B	PI3K_C2	2.70E-04	0.0085132072	0.8232370381	1.51E-01	1.48E-02	6.05E-04	0.001036574	1
OG0000317	PI3K_p85B	PI3K_rbd	2.39E-04	8.37E-03	8.23E-01	1.52E-01	1.49E-02	6.07E-04	0.001041215	1
OG0000317	PI3K_p85B	PI3_PI4_kinase	2.70E-04	8.51E-03	8.23E-01	1.51E-01	1.48E-02	6.05E-04	1.04E-03	1
OG0000317	PI3K_rbd	PI3Ka	1.13E-06	1.39E-06	2.52E-04	4.13E-06	3.51E-08	3.32E-09	7.98E-06	1
OG0000317	PI3K_rbd	PI3K_C2	1.37E-06	1.66E-06	3.00E-04	5.02E-06	4.47E-08	6.85E-09	1.95E-05	1
OG0000317	PI3K_rbd	PI3_PI4_kinase	4.49E-07	6.76E-07	1.66E-04	3.08E-06	2.63E-08	2.53E-09	7.37E-06	1
OG0000317	PI3_PI4_kinase	C2	0.0197210654	0.6110693868	0.3066638654	0.0561721117	0.00551748	2.28E-04	3.91E-04	1
OG0000317	PI3_PI4_kinase	PX	2.84E-04	8.58E-03	0.8234614049	0.1509800862	1.48E-02	6.03E-04	1.03E-03	1
OG0000317	PX	C2	0.0196475081	6.11E-01	3.07E-01	5.62E-02	5.52E-03	2.28E-04	3.91E-04	1
OG0000318	Propep_M14	Peptidase_M14	0.0081020222	6.69E-04	0.0680654558	0.0125974831	0.8090174539	3.28E-02	0.0563123299	1
OG0000320	DSPc	PTEN_C2	4.52E-07	5.45E-07	1.90E-06	3.79E-06	3.27E-08	2.86E-09	4.35E-06	1
OG0000320	PTEN_C2	SH2	1.97E-02	0.6111023143	3.07E-01	5.62E-02	5.52E-03	2.28E-04	3.91E-04	1
OG0000320	Y_phosphatase	PTEN_C2	1.63E-04	2.55E-04	2.43E-02	1.16E-01	1.13E-02	4.57E-04	6.71E-01	1
OG0000320	Y_phosphatase	SH2	0.1666452028	4.89E-01	2.45E-01	0.0449095318	0.0044131029	1.83E-04	3.14E-04	1
OG0000322	Pex2_Pex12	zf-C3HC4_3	1.26E-02	3.93E-04	4.29E-06	1.97E-06	5.89E-05	2.11E-06	6.46E-06	1
OG0000332	SGTA_dimer	TPR_1	7.64E-05	2.04E-06	6.40E-08	8.41E-05	7.50E-03	3.03E-04	7.84E-01	1
OG0000332	SGTA_dimer	TPR_11	7.62E-05	2.02E-06	2.18E-08	2.16E-06	7.80E-05	2.66E-04	0.6928638762	1
OG0000332	TPR_11	TPR_1	2.23E-07	5.18E-09	3.37E-12	2.32E-11	9.75E-11	1.52E-10	3.87E-07	1
OG0000332	TPR_11	TPR_2	0.011871482	3.68E-04	1.44E-07	1.54E-06	6.92E-08	2.44E-07	7.27E-04	1
OG0000332	TPR_1	TPR_11	4.50E-03	1.95E-06	2.05E-08	6.53E-08	1.58E-07	2.82E-07	7.28E-04	1
OG0000337	BTB	BACK	0.9182280596	4.48E-02	2.25E-02	0.0041592626	4.17E-04	2.17E-05	1.27E-03	0
OG0000337	MATH	BTB	8.77E-01	4.31E-02	2.17E-02	4.00E-03	6.63E-03	2.73E-04	4.68E-04	1
OG0000339	GMC_oxred_N	GMC_oxred_C	6.56E-07	4.50E-09	1.17E-12	3.26E-11	1.24E-11	2.86E-11	6.74E-07	1
OG0000340	LysM	TLD	0.0010895521	0.0013540716	4.84E-04	6.25E-01	6.13E-02	2.48E-03	8.30E-02	1
OG0000340	RabGAP-TBC	TLD	7.21E-06	2.03E-06	1.31E-07	7.29E-05	8.61E-08	2.32E-08	1.33E-05	1
OG0000343	Chromo	Chromo_shadow	1.22E-02	3.98E-04	7.80E-06	1.48E-05	1.33E-03	5.36E-05	1.15E-01	1
OG0000345	Macro	CRAL_TRIO_2	4.60E-03	2.99E-06	9.26E-05	1.22E-03	7.84E-07	2.40E-06	8.37E-04	1
OG0000346	HTH_psq	DDE_1	0.9225131802	0.0473058349	0.023884295	0.0044092306	4.42E-04	2.27E-05	3.93E-05	0
OG0000346	HTH_psq	HTH_Tnp_Tc5	8.43E-01	4.16E-02	2.10E-02	3.88E-03	8.20E-04	3.80E-05	6.55E-05	1
OG0000347	ABC_tran	ABC_tran_Xtn	1.70E-13	0	0	0.00E+00	0.00E+00	2.61E-12	1.75E-07	1
OG0000347	ABC_tran_Xtn	ABC_tran	1.67E-13	0.00E+00	0.00E+00	0.00E+00	0.00E+00	2.58E-12	1.74E-07	1
OG0000349	GST_N_3	GST_C	3.56E-03	2.05E-06	6.83E-06	6.07E-05	7.03E-06	1.32E-08	4.25E-06	1
OG0000349	GST_N	GST_C	0.0032652795	9.11E-07	3.28E-08	1.67E-06	1.59E-05	3.79E-07	1.25E-06	1
OG0000350	NPC1_N	Patched	0.0081871053	3.79E-04	3.39E-06	9.71E-08	5.08E-05	1.79E-06	1.00E-03	1
OG0000350	NPC1_N	Sterol-sensing	0.3523808808	0.018343804	0.0091525483	0.0016288244	1.76E-01	7.10E-03	1.22E-02	1
OG0000350	Sterol-sensing	Patched	0.2280460743	0.0113865742	0.0056030189	9.63E-04	1.04E-01	4.21E-03	7.20E-03	1
OG0000351	ADH_N	ADH_zinc_N	1.32E-07	5.79E-10	1.16E-15	2.30E-13	3.81E-13	3.04E-12	8.53E-08	1
OG0000359	HATPase_c	HSP90	4.86E-12	1.00E-13	0	0	0.00E+00	1.72E-12	2.27E-08	1
OG0000362	Bromodomain	PWWP	0.0057918706	0.0081932971	0.7864488801	0.1441792984	4.93E-02	1.99E-03	3.42E-03	1
OG0000362	EPL1	Bromodomain	7.18E-06	2.02E-06	1.59E-07	5.68E-04	5.16E-02	2.09E-03	7.48E-01	1
OG0000362	EPL1	PHD_2	3.51E-06	1.33E-06	1.60E-08	4.38E-06	3.28E-04	1.24E-03	5.22E-01	1
OG0000362	EPL1	PWWP	5.81E-03	8.19E-03	7.86E-01	1.44E-01	4.92E-02	1.99E-03	3.42E-03	1
OG0000362	EPL1	zf-HC5HC2H_2	3.49E-06	1.32E-06	1.57E-08	3.54E-06	2.49E-04	9.44E-04	3.96E-01	1
OG0000362	PHD_2	Bromodomain	7.17E-06	2.01E-06	7.13E-08	2.01E-04	1.82E-02	7.36E-04	2.63E-01	1
OG0000362	PHD_2	PWWP	0.0058063646	0.0081939111	0.7862252601	0.144123138	4.92E-02	1.99E-03	3.42E-03	1
OG0000362	PHD_2	zf-HC5HC2H_2	2.27E-10	1.01E-11	2.22E-14	1.92E-10	5.09E-10	8.31E-08	1.35E-04	1
OG0000362	PHD	zf-HC5HC2H_2	0.2792158026	1.35E-02	6.65E-03	1.16E-03	3.80E-02	1.54E-03	2.62E-03	1
OG0000362	zf-HC5HC2H_2	Bromodomain	7.17E-06	2.01E-06	7.13E-08	2.01E-04	1.82E-02	7.36E-04	2.63E-01	1
OG0000362	zf-HC5HC2H_2	PHD	0.0152170816	5.24E-04	0.0502639825	0.0091204095	7.55E-01	3.05E-02	5.23E-02	1
OG0000362	zf-HC5HC2H_2	PWWP	0.0058063646	0.0081939111	0.7862252601	0.144123138	4.92E-02	1.99E-03	3.42E-03	1
OG0000363	C1_1	DAGK_acc	1.69E-06	4.39E-09	4.52E-10	2.19E-06	7.15E-09	1.46E-07	1.04E-03	1
OG0000363	C1_1	DAGK_cat	1.77E-06	4.54E-09	4.63E-10	2.22E-06	7.23E-09	1.47E-07	1.04E-03	1
OG0000363	C1_1	RA	0.8381766628	4.09E-02	2.06E-02	3.80E-03	3.83E-04	2.03E-05	3.52E-05	1
OG0000363	C1_1	SAM_1	0.9252594362	4.51E-02	2.27E-02	4.19E-03	4.20E-04	2.18E-05	3.78E-05	0
OG0000363	DAGK_acc	Ank_2	0.1681185322	4.93E-01	2.47E-01	4.53E-02	4.45E-03	1.85E-04	3.17E-04	1
OG0000363	DAGK_acc	SAM_1	0.9254521251	0.0451186892	0.0227064645	0.0041911786	4.21E-04	2.18E-05	3.78E-05	0
OG0000363	DAGK_cat	Ank_2	0.1681185322	0.4931428205	0.2473227831	0.0453039312	4.45E-03	1.85E-04	3.17E-04	1
OG0000363	DAGK_cat	DAGK_acc	6.74E-12	1.23E-13	0	1.38E-12	3.94E-12	7.66E-10	1.22E-04	1
OG0000363	DAGK_cat	SAM_1	0.9252594362	4.51E-02	2.27E-02	4.19E-03	4.20E-04	2.18E-05	3.78E-05	0
OG0000363	DAG_kinase_N	DAGK_acc	0.1429971222	0.0068002166	0.6558079794	0.1201756153	1.18E-02	4.81E-04	8.25E-04	1
OG0000363	DAG_kinase_N	DAGK_cat	0.1429971222	0.0068002166	0.6558079794	0.1201756153	1.18E-02	4.81E-04	8.25E-04	1
OG0000363	PH	C1_1	0.1469892068	0.0069825161	0.6727821466	0.1232827036	1.21E-02	4.94E-04	8.46E-04	1
OG0000363	PH	DAGK_acc	0.0029916938	0.0085556194	0.8206489067	0.1504247976	1.48E-02	6.01E-04	1.03E-03	1
OG0000363	PH	DAGK_cat	0.0029916938	8.56E-03	8.21E-01	1.50E-01	1.48E-02	6.01E-04	1.03E-03	1
OG0000363	RA	DAGK_acc	0.2999176242	0.4352981866	0.2184272839	0.0400182199	3.93E-03	1.64E-04	2.81E-04	1
OG0000363	RA	DAGK_cat	0.300082269	4.35E-01	2.18E-01	4.00E-02	3.93E-03	1.64E-04	2.81E-04	1
OG0000364	Macro	PARP	0.008067956	1.40E-01	8.81E-02	1.66E-02	1.55E-03	6.36E-05	2.27E-02	1
OG0000364	WWE	PARP	0.002310942	2.15E-02	1.19E-02	2.13E-03	9.45E-05	3.63E-06	2.93E-03	1
OG0000367	BRCT	PARP	1.03E-03	2.82E-03	2.70E-01	4.94E-02	4.77E-03	1.94E-04	5.29E-01	1
OG0000367	BRCT	VIT	1.06E-03	2.91E-03	2.79E-01	5.12E-02	4.94E-03	2.01E-04	5.20E-01	1
OG0000367	PARP_reg	PARP	1.13E-04	1.29E-04	1.22E-02	2.14E-03	9.39E-05	3.22E-04	7.82E-01	1
OG0000367	PARP	VIT	1.17E-04	1.24E-04	1.17E-02	2.04E-03	8.36E-05	2.86E-04	7.85E-01	1
OG0000367	PARP	VWA_3	1.17E-04	1.24E-04	1.17E-02	2.04E-03	8.36E-05	2.86E-04	7.85E-01	1
OG0000367	VIT	VWA_3	1.03E-06	7.03E-08	2.18E-07	2.07E-08	5.73E-11	3.80E-10	2.37E-04	1
OG0000369	DUF4062	AAA_16	4.20E-06	3.50E-05	0.0033576748	5.29E-04	6.93E-03	2.80E-04	7.81E-01	1
OG0000369	DUF4062	NACHT	8.33E-06	1.16E-04	1.16E-02	2.06E-03	8.61E-05	2.95E-04	7.85E-01	1
OG0000369	DUF4062	TPR_12	3.76E-04	2.91E-03	2.81E-01	5.16E-02	4.99E-03	2.03E-04	5.25E-01	1
OG0000369	DUF4062	WD40	5.89E-06	2.88E-05	2.66E-03	6.15E-02	5.93E-03	2.40E-04	7.33E-01	1
OG0000369	NACHT	WD40	0.0136061714	4.60E-01	2.32E-01	4.25E-02	7.24E-02	2.93E-03	3.83E-02	1
OG0000369	TROVE	DUF4062	7.24E-06	2.34E-06	2.91E-05	5.72E-04	7.50E-03	3.03E-04	7.84E-01	1
OG0000369	TROVE	WD40	8.73E-05	3.47E-05	3.14E-03	7.20E-02	6.95E-03	2.81E-04	7.26E-01	1
OG0000371	DEAD	Helicase_C	2.50E-10	1.09E-10	0.00E+00	0.00E+00	3.69E-15	1.98E-11	1.39E-07	1
OG0000371	DEAD	HRDC	6.71E-06	1.99E-06	2.41E-08	1.31E-06	8.21E-07	2.53E-06	9.49E-04	1
OG0000371	DEAD	HTH_40	0.9006019681	0.0439208482	0.0221056429	0.0040806108	4.54E-03	1.88E-04	3.23E-04	0
OG0000371	DEAD	RecQ_Zn_bind	1.08E-08	2.48E-09	4.07E-14	4.52E-13	3.56E-13	7.79E-11	6.53E-07	1
OG0000371	DEAD	RQC	6.69E-06	1.99E-06	7.93E-07	1.28E-06	1.53E-07	2.57E-07	6.60E-04	1
OG0000371	Helicase_C	HRDC	6.23E-06	1.96E-06	2.34E-08	1.29E-06	1.85E-07	3.65E-07	9.45E-04	1
OG0000371	Helicase_C	HTH_40	0.891872702	0.0435598368	0.0219216305	0.0040445488	4.49E-03	1.86E-04	1.08E-02	1
OG0000371	Helicase_C	RecQ_Zn_bind	4.40E-09	8.39E-10	3.93E-15	6.08E-14	4.79E-14	2.53E-11	5.59E-07	1
OG0000371	Helicase_C	RQC	6.09E-06	1.84E-06	6.42E-07	1.17E-06	1.33E-07	2.14E-07	6.32E-04	1
OG0000371	HRDC	HTH_40	0.8923499523	4.36E-02	2.19E-02	4.05E-03	4.50E-03	1.87E-04	1.08E-02	1
OG0000371	RecQ_Zn_bind	HRDC	6.62E-05	1.97E-06	3.42E-08	1.30E-06	8.20E-07	2.53E-06	9.49E-04	1
OG0000371	RecQ_Zn_bind	HTH_40	0.9084336206	4.44E-02	2.23E-02	4.12E-03	4.58E-03	1.90E-04	3.26E-04	0
OG0000371	RecQ_Zn_bind	RQC	6.67E-05	1.95E-06	2.31E-06	1.24E-06	1.44E-07	2.34E-07	6.49E-04	1
OG0000371	RQC	HRDC	6.92E-06	2.02E-06	8.43E-07	1.47E-06	1.52E-05	3.48E-07	9.47E-04	1
OG0000371	RQC	HTH_40	0.8357742562	0.0408201704	0.0205498299	0.0037936915	4.22E-03	1.75E-04	1.02E-02	1
OG0000372	Rap_GAP	CNH	5.70E-06	4.72E-07	3.88E-07	0.001058583	3.14E-05	1.49E-03	7.65E-01	1
OG0000373	A2M	A2M_comp	8.17E-01	1.11E-01	5.97E-02	1.11E-02	1.10E-03	4.92E-05	8.47E-05	1
OG0000373	A2M	A2M_recep	0.8453084657	9.46E-02	5.00E-02	9.25E-03	9.17E-04	4.19E-05	7.23E-05	1
OG0000373	A2M_comp	A2M_recep	0.8103139936	1.15E-01	6.20E-02	1.15E-02	1.14E-03	5.09E-05	8.76E-05	1
OG0000373	A2M_N_2	A2M	8.01E-01	1.21E-01	6.52E-02	1.21E-02	1.20E-03	5.33E-05	9.18E-05	1
OG0000373	A2M_N_2	A2M_comp	8.29E-01	1.05E-01	5.56E-02	1.03E-02	1.02E-03	4.61E-05	7.95E-05	1
OG0000373	A2M_N_2	A2M_recep	8.53E-01	9.02E-02	4.75E-02	8.79E-03	8.71E-04	4.00E-05	6.91E-05	1
OG0000373	A2M_N_2	Thiol-ester_cl	0.8492858954	9.22E-02	4.86E-02	9.00E-03	8.93E-04	4.09E-05	7.06E-05	1
OG0000373	A2M_N	A2M	0.8893408827	0.0679471088	0.0350852554	0.0064855173	6.46E-04	3.09E-05	5.34E-05	1
OG0000373	A2M_N	A2M_comp	0.8915595743	0.0665703932	0.0343295202	6.35E-03	6.32E-04	3.04E-05	5.25E-05	1
OG0000373	A2M_N	A2M_N_2	0.8860397918	0.0699822383	0.0362060665	0.0066937774	6.66E-04	3.17E-05	5.49E-05	1
OG0000373	A2M_N	A2M_recep	8.55E-01	5.24E-02	2.68E-02	4.95E-03	4.95E-04	2.48E-05	4.30E-05	1
OG0000373	A2M_N	Thiol-ester_cl	0.8920374837	6.63E-02	3.42E-02	6.31E-03	6.29E-04	3.02E-05	5.23E-05	1
OG0000373	A2M	Thiol-ester_cl	0.8397399843	0.0978657304	0.0518488306	0.0096090261	9.52E-04	4.33E-05	7.47E-05	1
OG0000373	Thiol-ester_cl	A2M_comp	0.8174606608	0.1109227928	0.0594914809	0.0110429136	0.0010931246	4.90E-05	8.45E-05	1
OG0000373	Thiol-ester_cl	A2M_recep	0.8495128908	0.0911299787	0.0480345798	0.0088971149	8.82E-04	4.05E-05	6.99E-05	1
OG0000373	zf-Sec23_Sec24	VWA_2	0.0174739281	6.57E-04	6.47E-02	1.18E-02	1.06E-03	3.65E-03	4.17E-01	1
OG0000377	SAM_PNT	Ets	8.97E-01	6.37E-02	3.28E-02	6.06E-03	6.04E-04	2.92E-05	5.06E-05	1
OG0000389	TPR_11	RPAP3_C	5.85E-06	1.91E-06	3.03E-08	1.28E-06	1.00E-07	7.55E-08	6.31E-06	1
OG0000389	TPR_11	TPR_1	4.34E-07	5.64E-07	1.43E-08	1.97E-05	4.92E-08	1.24E-08	3.28E-06	1
OG0000389	TPR_11	TPR_2	0.0047007183	7.61E-06	5.37E-04	1.32E-06	2.34E-06	7.70E-06	1.14E-02	1
OG0000389	TPR_1	RPAP3_C	6.63E-06	6.16E-06	4.02E-04	1.83E-03	6.10E-05	2.20E-06	7.67E-06	1
OG0000389	TPR_1	TPR_11	0.0018219021	5.12E-03	2.38E-03	5.44E-02	5.23E-03	1.78E-02	3.06E-02	1
OG0000391	Peptidase_M16	Peptidase_M16_C	2.98E-12	4.87E-14	0	0	0.00E+00	2.07E-12	8.28E-08	1
OG0000395	Ank_2	Ion_trans	0.0113510726	6.00E-01	3.22E-01	5.96E-02	5.86E-03	2.42E-04	4.15E-04	1
OG0000397	AA_permease_2	AA_permease_C	0.0027681955	1.64E-04	9.88E-09	4.12E-06	5.36E-06	1.03E-07	4.77E-04	1
OG0000399	L27	PDZ	0.9260402225	4.56E-02	2.30E-02	4.24E-03	4.25E-04	2.20E-05	3.82E-05	0
OG0000402	DEAD	DUF4217	2.79E-11	2.95E-13	0.00E+00	0.00E+00	3.90E-15	3.58E-11	2.59E-07	1
OG0000402	DEAD	Helicase_C	8.26E-12	1.44E-13	0.00E+00	0.00E+00	0.00E+00	5.95E-12	6.44E-08	1
OG0000402	Helicase_C	DUF4217	1.93E-11	2.52E-13	0.00E+00	0.00E+00	4.42E-15	3.98E-11	3.21E-07	1
OG0000405	Peptidase_S8	P_proprotein	5.65E-10	1.69E-09	6.42E-12	7.24E-09	5.35E-05	2.50E-05	1.87E-02	1
OG0000405	S8_pro-domain	Peptidase_S8	5.90E-07	7.20E-07	1.44E-07	7.27E-04	6.64E-02	3.10E-03	7.10E-01	1
OG0000405	S8_pro-domain	P_proprotein	8.40E-07	8.35E-07	1.60E-07	7.79E-04	6.96E-02	3.20E-03	7.10E-01	1
OG0000406	NTP_transf_2	PAP_assoc	0.0042046901	2.05E-06	6.75E-06	1.15E-06	6.78E-06	1.09E-08	8.42E-06	1
OG0000406	PAP_assoc	NTP_transf_2	0.8648160837	4.21E-02	2.12E-02	3.92E-03	3.94E-04	2.07E-05	3.60E-05	1
OG0000406	zf-met	PAP_assoc	0.882005159	4.30E-02	2.16E-02	3.99E-03	4.01E-04	2.10E-05	3.65E-05	1
OG0000410	E1-E2_ATPase	Hydrolase	5.63E-08	4.73E-10	2.43E-15	5.52E-14	2.14E-14	5.11E-12	4.36E-08	1
OG0000410	HMA	E1-E2_ATPase	6.96E-08	7.65E-10	7.49E-15	3.11E-13	2.75E-13	3.36E-11	8.39E-08	1
OG0000410	HMA	Hydrolase	3.08E-07	2.23E-08	1.02E-13	6.10E-13	4.90E-13	4.56E-11	1.01E-07	1
OG0000413	AMP-binding	AMP-binding_C	0.0011787891	2.14E-07	4.24E-10	1.34E-08	8.91E-10	6.28E-09	1.96E-06	1
OG0000415	Cation_ATPase	Cation_ATPase_C	4.22E-06	5.50E-06	3.98E-04	4.99E-08	1.65E-06	5.98E-06	3.82E-04	1
OG0000415	Cation_ATPase	Hydrolase_3	1.02E-04	2.95E-03	1.29E-03	1.39E-04	1.46E-02	5.89E-04	9.89E-04	1
OG0000415	Cation_ATPase_N	Cation_ATPase	5.82E-06	6.36E-06	4.50E-04	5.68E-08	2.47E-06	8.69E-06	5.34E-04	1
OG0000415	Cation_ATPase_N	Cation_ATPase_C	4.98E-09	3.43E-10	1.55E-12	3.60E-12	2.57E-10	1.73E-08	5.25E-07	1
OG0000415	Cation_ATPase_N	E1-E2_ATPase	3.95E-09	2.89E-10	1.31E-12	2.96E-12	2.13E-10	1.49E-08	3.75E-07	1
OG0000415	Cation_ATPase_N	Hydrolase	2.82E-06	7.57E-08	6.78E-10	1.96E-09	7.35E-09	1.06E-07	1.53E-06	1
OG0000415	Cation_ATPase_N	Hydrolase_3	1.01E-04	2.95E-03	1.29E-03	1.39E-04	1.46E-02	5.89E-04	9.89E-04	1
OG0000415	E1-E2_ATPase	Cation_ATPase	4.87E-06	5.81E-06	4.16E-04	5.20E-08	1.72E-06	6.14E-06	3.85E-04	1
OG0000415	E1-E2_ATPase	Cation_ATPase_C	2.64E-09	2.25E-10	1.00E-12	2.08E-12	1.68E-10	1.28E-08	3.15E-07	1
OG0000415	E1-E2_ATPase	Hydrolase	2.75E-06	6.79E-08	5.36E-10	1.51E-09	5.76E-09	9.28E-08	1.06E-06	1
OG0000415	E1-E2_ATPase	Hydrolase_3	1.02E-04	2.95E-03	1.29E-03	1.39E-04	1.46E-02	5.89E-04	9.89E-04	1
OG0000415	Hydrolase_3	Cation_ATPase_C	1.02E-04	0.0029534695	1.29E-03	1.39E-04	1.46E-02	5.89E-04	9.89E-04	1
OG0000415	Hydrolase	Cation_ATPase_C	2.37E-06	5.74E-08	4.35E-10	1.23E-09	4.93E-09	8.99E-08	1.01E-06	1
OG0000420	CH	Calponin	0.0074254894	5.93E-04	1.20E-04	3.53E-01	5.72E-01	2.31E-02	3.98E-02	1
OG0000421	DEAD	Helicase_C	9.56E-11	8.48E-12	0.00E+00	3.26E-13	5.54E-14	1.49E-11	2.89E-07	1
OG0000421	KH_1	DEAD	0.917081461	4.47E-02	2.25E-02	4.15E-03	4.17E-04	2.17E-05	3.76E-05	0
OG0000421	KH_1	Helicase_C	0.917081461	4.47E-02	2.25E-02	4.15E-03	4.17E-04	2.17E-05	3.76E-05	0
OG0000422	AA_permease_N	AA_permease	0.0246827972	9.99E-04	3.11E-04	8.88E-01	8.71E-02	3.52E-03	6.04E-03	1
OG0000422	AA_permease_N	SLC12	0.0230473514	9.29E-04	2.94E-04	0.8564890375	8.40E-02	3.40E-03	5.83E-03	1
OG0000422	AA_permease	SLC12	6.27E-11	1.61E-11	1.40E-12	1.71E-09	1.68E-09	2.88E-06	4.06E-06	1
OG0000425	Peptidase_M10	Hemopexin	0.8667297623	7.92E-02	4.14E-02	7.66E-03	7.61E-04	3.56E-05	6.15E-05	1
OG0000425	PG_binding_1	Hemopexin	0.8632052066	0.0476314693	0.0241672294	4.46E-03	4.47E-04	2.29E-05	3.97E-05	1
OG0000425	PG_binding_1	Peptidase_M10	0.8215670624	1.08E-01	5.78E-02	1.07E-02	1.06E-03	4.78E-05	8.23E-05	1
OG0000428	Alpha-mann_mid	Glyco_hydro_38C	1.02E-09	2.17E-10	7.80E-12	6.69E-09	1.48E-11	5.40E-11	3.38E-07	1
OG0000428	Glyco_hydro_38	Alpha-mann_mid	5.17E-10	9.24E-11	2.69E-12	1.93E-09	2.23E-12	1.23E-11	2.72E-07	1
OG0000428	Glyco_hydro_38	Glyco_hydro_38C	9.16E-10	1.96E-10	7.04E-12	6.01E-09	1.30E-11	4.72E-11	3.31E-07	1
OG0000429	PRK	UPRTase	7.20E-06	2.01E-06	2.12E-08	6.75E-08	1.52E-07	2.50E-07	6.32E-04	1
OG0000430	Hist_deacetyl	zf-UBP	0.8707156604	4.25E-02	2.14E-02	3.95E-03	3.97E-04	2.09E-05	3.62E-05	1
OG0000431	AAA_2	ClpB_D2-small	2.01E-08	3.59E-10	3.29E-15	4.30E-14	7.38E-13	4.09E-11	7.64E-08	1
OG0000431	Ank_2	AAA_2	2.83E-04	6.09E-04	1.10E-04	4.49E-01	4.88E-01	0.0197280195	0.0338294153	1
OG0000431	Ank_2	ClpB_D2-small	2.81E-04	6.07E-04	1.09E-04	4.49E-01	4.88E-01	1.97E-02	3.38E-02	1
OG0000431	Ank	AAA_2	8.62E-04	1.02E-03	3.18E-04	0.8989967416	0.0881822365	0.0035676375	0.0061150109	1
OG0000431	Ank	ClpB_D2-small	8.34E-04	1.01E-03	3.14E-04	8.92E-01	8.75E-02	3.54E-03	6.06E-03	1
OG0000436	DnaJ_C	DnaJ_CXXCXGXG	1.86E-08	3.52E-11	0.00E+00	0.00E+00	1.53E-14	1.03E-11	3.63E-07	1
OG0000436	DnaJ	DnaJ_C	1.64E-11	2.73E-13	0.00E+00	0.00E+00	0.00E+00	3.08E-12	7.94E-08	1
OG0000436	DnaJ	DnaJ_CXXCXGXG	1.86E-08	3.52E-11	0.00E+00	0.00E+00	1.53E-14	1.03E-11	3.63E-07	1
OG0000438	DUF971	TauD	1.75E-07	1.21E-09	9.72E-13	7.51E-09	2.51E-06	1.38E-04	2.39E-02	1
OG0000439	ACAS_N	AMP-binding	1.59E-09	5.04E-11	2.98E-13	4.16E-11	2.14E-11	3.43E-11	3.08E-07	1
OG0000439	ACAS_N	AMP-binding_C	1.79E-09	5.59E-11	3.38E-13	4.76E-11	2.46E-11	3.97E-11	3.15E-07	1
OG0000439	AMP-binding	AMP-binding_C	7.00E-11	8.19E-12	8.16E-14	1.52E-11	8.92E-12	2.02E-11	2.19E-07	1
OG0000440	PK	PK_C	3.45E-07	6.40E-09	5.32E-12	1.78E-11	3.08E-11	4.37E-10	1.57E-07	1
OG0000442	Gal_mutarotas_2	Glyco_hydro_31	3.87E-03	9.67E-07	6.45E-06	6.95E-08	6.66E-06	8.84E-09	3.44E-06	1
OG0000442	NtCtMGAM_N	Gal_mutarotas_2	4.28E-03	9.99E-07	6.59E-06	7.05E-08	6.77E-06	9.62E-09	5.33E-06	1
OG0000442	NtCtMGAM_N	Glyco_hydro_31	8.78E-05	1.34E-08	2.49E-10	7.03E-10	1.31E-09	1.22E-09	1.04E-06	1
OG0000442	Trefoil	Gal_mutarotas_2	6.31E-03	8.66E-05	8.14E-03	1.40E-03	1.10E-01	4.46E-03	2.58E-01	1
OG0000442	Trefoil	Glyco_hydro_31	3.40E-03	1.97E-06	8.89E-07	1.93E-06	3.52E-05	1.20E-04	6.97E-03	1
OG0000442	Trefoil	NtCtMGAM_N	3.41E-03	2.17E-06	2.05E-05	1.93E-06	3.52E-05	1.20E-04	6.97E-03	1
OG0000444	SPX	EXS	1.36E-05	1.43E-07	2.39E-09	1.19E-07	3.15E-09	7.49E-10	2.59E-06	1
OG0000445	FAD_binding_6	NAD_binding_1	6.35E-08	4.95E-09	4.02E-15	5.88E-13	2.07E-13	6.33E-11	2.24E-07	1
OG0000445	Oxidored-like	FAD_binding_6	8.84E-01	4.31E-02	2.17E-02	4.00E-03	4.02E-04	2.11E-05	3.66E-05	1
OG0000445	Oxidored-like	NAD_binding_1	8.84E-01	4.31E-02	2.17E-02	4.00E-03	4.02E-04	2.11E-05	3.66E-05	1
OG0000446	RNase_PH	RNase_PH_C	2.71E-10	4.43E-12	1.06E-15	3.90E-15	4.92E-14	2.07E-11	2.32E-07	1
OG0000449	Alpha_kinase	Sel1	0.6865478261	0.0334394383	0.016778433	0.2395763044	0.0235044565	9.54E-04	1.64E-03	1
OG0000450	DEAD	Helicase_C	1.46E-10	4.37E-12	0.00E+00	3.45E-14	1.62E-12	1.24E-11	1.56E-07	1
OG0000451	ABC_membrane_2	ABC_tran	6.05E-09	9.40E-12	0	0	0	1.95E-12	4.00E-08	1
OG0000453	Cu2_monooxygen	Cu2_monoox_C	5.29E-04	3.05E-03	1.65E-03	2.19E-04	1.28E-04	8.90E-04	1.57E-03	1
OG0000453	DOMON	Cu2_monoox_C	0.0461185515	0.0058278922	0.0029350488	4.53E-04	3.83E-04	1.32E-03	2.25E-03	1
OG0000453	DOMON	Cu2_monooxygen	0.0446572179	5.42E-03	2.71E-03	4.10E-04	3.36E-04	1.16E-03	1.97E-03	1
OG0000455	HMA	Sod_Cu	4.52E-03	2.22E-06	2.19E-05	7.34E-06	5.45E-04	1.85E-03	1.08E-01	1
OG0000456	Inhibitor_I29	Peptidase_C1	2.50E-02	1.03E-03	3.29E-04	1.17E-03	1.59E-07	2.85E-07	7.99E-04	1
OG0000457	Peptidase_M16_C	Peptidase_M16_M	2.34E-08	2.75E-10	6.36E-14	1.38E-11	2.67E-11	3.91E-10	3.60E-07	1
OG0000457	Peptidase_M16_M	Peptidase_M16_C	9.33E-06	3.46E-08	4.38E-10	3.21E-08	1.31E-09	1.51E-09	9.13E-07	1
OG0000457	Peptidase_M16	Peptidase_M16_C	2.53E-08	2.90E-10	6.31E-14	1.32E-11	2.53E-11	3.61E-10	2.85E-07	1
OG0000457	Peptidase_M16	Peptidase_M16_M	2.10E-08	1.90E-10	2.50E-14	4.54E-12	5.54E-12	2.84E-10	2.94E-07	1
OG0000458	PH	Oxysterol_BP	5.74E-05	6.55E-07	3.24E-08	9.44E-05	9.30E-03	4.19E-04	7.92E-04	1
OG0000459	PHD	MOZ_SAS	1.53E-04	2.07E-06	3.46E-06	0.0155728903	0.8725096211	0.0352984019	0.060590884	1
OG0000459	Tudor-knot	MOZ_SAS	7.91E-07	3.82E-09	4.07E-12	1.00E-10	1.84E-10	2.72E-09	2.78E-06	1
OG0000461	Ald_Xan_dh_C	Ald_Xan_dh_C2	4.39E-08	8.31E-09	2.39E-10	1.82E-08	4.53E-10	7.87E-10	7.69E-07	1
OG0000461	CO_deh_flav_C	Ald_Xan_dh_C	8.00E-07	1.16E-08	2.97E-10	2.04E-08	4.86E-10	7.37E-10	4.73E-07	1
OG0000461	CO_deh_flav_C	Ald_Xan_dh_C2	8.21E-07	1.23E-08	3.21E-10	2.23E-08	5.35E-10	8.31E-10	7.80E-07	1
OG0000461	FAD_binding_5	Ald_Xan_dh_C	1.02E-06	1.32E-08	3.30E-10	2.19E-08	5.15E-10	7.50E-10	4.76E-07	1
OG0000461	FAD_binding_5	Ald_Xan_dh_C2	1.05E-06	1.40E-08	3.55E-10	2.39E-08	5.67E-10	8.45E-10	7.84E-07	1
OG0000461	FAD_binding_5	CO_deh_flav_C	1.26E-06	1.50E-08	3.64E-10	2.36E-08	5.47E-10	7.64E-10	4.78E-07	1
OG0000461	Fer2_2	Ald_Xan_dh_C	1.02E-06	1.93E-08	5.54E-10	4.07E-08	1.54E-09	1.03E-09	8.22E-07	1
OG0000461	Fer2_2	Ald_Xan_dh_C2	1.02E-06	1.93E-08	5.54E-10	4.07E-08	1.54E-09	1.03E-09	8.22E-07	1
OG0000461	Fer2_2	CO_deh_flav_C	1.25E-06	2.18E-08	6.10E-10	4.34E-08	1.62E-09	1.05E-09	8.25E-07	1
OG0000461	Fer2_2	FAD_binding_5	1.14E-06	2.04E-08	5.77E-10	4.18E-08	1.57E-09	1.04E-09	8.23E-07	1
OG0000461	Fer2	Ald_Xan_dh_C	6.51E-06	1.53E-07	5.20E-09	2.62E-07	8.47E-09	3.02E-09	3.08E-06	1
OG0000461	Fer2	Ald_Xan_dh_C2	6.51E-06	1.53E-07	5.20E-09	2.62E-07	8.47E-09	3.02E-09	3.08E-06	1
OG0000461	Fer2	CO_deh_flav_C	7.99E-06	1.72E-07	5.70E-09	2.83E-07	9.10E-09	3.14E-09	3.11E-06	1
OG0000461	Fer2	FAD_binding_5	7.29E-06	1.63E-07	5.46E-09	2.73E-07	8.80E-09	3.08E-09	3.10E-06	1
OG0000461	Fer2	Fer2_2	5.40E-06	1.36E-07	4.70E-09	2.39E-07	7.71E-09	2.57E-09	1.47E-06	1
OG0000463	CathepsinC_exc	Peptidase_C1	0.0045866036	2.04E-06	1.16E-06	0.0047149795	3.44E-04	1.36E-05	2.40E-06	1
OG0000463	Propeptide_C1	Peptidase_C1	6.74E-06	9.65E-07	8.70E-06	1.09E-03	4.60E-08	7.12E-08	6.38E-06	1
OG0000464	DEAD	Helicase_C	5.05E-11	7.46E-12	0.00E+00	3.33E-15	6.07E-14	3.90E-11	1.63E-07	1
OG0000464	DEAD	Sec63	4.49E-11	7.27E-12	0.00E+00	3.94E-15	6.68E-14	4.02E-11	1.64E-07	1
OG0000464	Helicase_C	DEAD	1.42E-08	6.09E-09	2.21E-13	9.75E-13	1.37E-11	2.93E-10	7.17E-07	1
OG0000464	Helicase_C	Sec63	1.78E-11	2.65E-12	0.00E+00	0.00E+00	2.16E-14	3.26E-11	1.42E-07	1
OG0000464	Sec63	DEAD	1.04E-08	5.45E-09	2.04E-13	9.32E-13	1.32E-11	2.82E-10	6.63E-07	1
OG0000464	Sec63	Helicase_C	2.06E-04	3.88E-04	2.15E-08	7.23E-08	6.96E-06	1.05E-08	6.45E-06	1
OG0000465	PIN_4	RNB	7.20E-06	2.01E-06	2.12E-08	6.76E-08	1.01E-07	7.64E-08	6.53E-06	1
OG0000469	Fz	Frizzled	7.98E-01	1.06E-01	5.65E-02	1.05E-02	1.03E-03	4.65E-05	2.56E-02	1
OG0000474	Dynamin_M	GED	8.41E-10	5.75E-11	1.41E-15	8.48E-14	1.01E-12	1.96E-10	4.53E-07	1
OG0000474	Dynamin_M	PH	7.17E-06	4.08E-06	1.98E-04	9.00E-01	8.87E-02	3.60E-03	6.19E-03	1
OG0000474	Dynamin_N	Dynamin_M	3.85E-10	2.68E-11	0.00E+00	3.33E-14	4.24E-13	1.30E-10	2.13E-07	1
OG0000474	Dynamin_N	GED	9.88E-10	6.48E-11	1.56E-15	9.20E-14	1.08E-12	2.00E-10	4.55E-07	1
OG0000474	Dynamin_N	PH	7.17E-06	4.08E-06	1.98E-04	0.8997044426	0.0886860991	3.60E-03	6.19E-03	1
OG0000474	PH	GED	7.22E-06	4.08E-06	1.98E-04	0.8997361025	8.87E-02	3.60E-03	6.18E-03	1
OG0000477	Dicer_dimer	PAZ	0.4379533969	0.021431631	0.0106881759	0.0019207373	0.0061066536	2.49E-04	4.15E-04	1
OG0000477	Dicer_dimer	Ribonuclease_3	0.0320856804	1.40E-03	5.18E-04	2.54E-06	3.92E-04	1.58E-05	6.49E-06	1
OG0000477	Helicase_C	Dicer_dimer	3.15E-02	1.41E-03	5.23E-04	2.90E-06	3.94E-04	1.58E-05	6.45E-06	1
OG0000477	Helicase_C	PAZ	0.4239516431	2.07E-02	1.03E-02	1.85E-03	5.89E-03	2.40E-04	4.00E-04	1
OG0000477	Helicase_C	Ribonuclease_3	3.22E-02	1.41E-03	5.21E-04	2.62E-06	3.44E-04	1.38E-05	2.92E-06	1
OG0000477	PAZ	Ribonuclease_3	0.3995157966	0.0214646065	0.0107599369	1.93E-03	6.12E-03	2.49E-04	4.15E-04	1
OG0000477	ResIII	Dicer_dimer	3.58E-02	1.54E-03	5.86E-04	1.36E-05	1.40E-03	5.65E-05	7.63E-05	1
OG0000477	ResIII	Helicase_C	3.31E-02	1.40E-03	5.18E-04	1.13E-06	8.15E-06	6.06E-08	3.50E-06	1
OG0000477	ResIII	PAZ	0.6501986719	0.0316530783	0.015871546	2.90E-03	0.0047642274	1.96E-04	3.29E-04	1
OG0000477	ResIII	Ribonuclease_3	3.48E-02	1.49E-03	5.62E-04	9.11E-06	8.96E-04	3.61E-05	4.11E-05	1
OG0000478	NAD_binding_4	Sterile	0.0038460338	1.97E-06	7.36E-08	1.52E-07	8.02E-08	1.02E-08	7.42E-06	1
OG0000481	RIIa	cNMP_binding	1.22E-04	3.72E-04	3.34E-06	9.42E-03	0.87732779	0.0356081734	0.0613774548	1
OG0000482	Longin	Synaptobrevin	1.17E-06	1.09E-07	8.88E-12	2.48E-11	3.36E-12	3.80E-11	1.27E-07	1
OG0000487	HLH	PAS	3.34E-03	1.03E-05	8.18E-04	0.8994031028	0.0883274888	0.0035758865	0.0061344288	1
OG0000487	HLH	PAS_11	5.70E-03	2.69E-04	5.60E-02	8.46E-01	8.36E-02	3.40E-03	0.0058553653	1
OG0000487	PAS	PAS_11	8.23E-02	7.53E-03	7.56E-01	1.40E-01	1.38E-02	5.62E-04	9.64E-04	1
OG0000487	PAS	PAS_3	0.891885305	5.23E-02	2.66E-02	4.91E-03	4.91E-04	2.47E-05	4.28E-05	1
OG0000488	UIM	SH3_1	0.9257603761	0.0452391167	0.0227704428	0.0042029984	4.22E-04	2.19E-05	3.79E-05	0
OG0000488	VHS	FYVE	2.10E-04	3.94E-04	2.16E-06	0.0096694514	0.8778004956	3.55E-02	6.09E-02	1
OG0000488	VHS	GAT	1.53E-05	1.55E-07	1.69E-10	5.40E-10	1.27E-09	2.30E-09	4.02E-06	1
OG0000488	VHS	SH3_1	7.42E-06	9.34E-06	7.02E-04	0.0098643701	8.77E-01	3.55E-02	0.0608228834	1
OG0000488	VHS	UIM	0.6540072494	0.0318938784	0.0159954811	0.0029234174	0.2701902099	1.09E-02	1.87E-02	1
OG0000490	HAD_2	Abhydrolase_1	1.20E-02	3.76E-04	3.65E-02	8.39E-01	8.23E-02	3.33E-03	0.0057089025	1
OG0000491	Cation_ATPase_C	ATP_Ca_trans_C	1.52E-01	7.26E-03	6.99E-01	0.1281208612	0.0125728169	5.13E-04	8.79E-04	1
OG0000491	Cation_ATPase_N	ATP_Ca_trans_C	0.9203363291	0.0450250612	0.0226649768	0.0041837437	4.20E-04	2.18E-05	3.78E-05	0
OG0000491	Cation_ATPase_N	Cation_ATPase_C	3.31E-08	4.69E-09	6.97E-13	8.28E-13	4.64E-13	4.02E-11	1.34E-07	1
OG0000491	Cation_ATPase_N	E1-E2_ATPase	1.48E-08	2.94E-10	1.14E-13	3.49E-13	2.80E-13	3.33E-11	1.29E-07	1
OG0000491	Cation_ATPase_N	HAD	1.97E-05	3.89E-04	3.87E-07	0.0012088643	5.86E-07	1.73E-06	1.70E-06	1
OG0000491	E1-E2_ATPase	ATP_Ca_trans_C	9.20E-01	4.50E-02	2.27E-02	4.18E-03	4.20E-04	2.18E-05	3.78E-05	0
OG0000491	E1-E2_ATPase	Cation_ATPase_C	5.74E-09	1.04E-10	8.95E-15	6.58E-14	5.87E-14	1.42E-11	6.58E-08	1
OG0000491	E1-E2_ATPase	HAD	1.96E-05	3.88E-04	3.11E-07	1.20E-03	3.23E-07	8.34E-07	1.67E-06	1
OG0000491	HAD	ATP_Ca_trans_C	0.1474481444	7.01E-03	6.75E-01	1.24E-01	1.21E-02	4.95E-04	8.49E-04	1
OG0000491	HAD	Cation_ATPase_C	7.16E-06	2.01E-06	3.09E-07	1.20E-03	3.22E-07	8.32E-07	1.66E-06	1
OG0000493	Ins145_P3_rec	Ion_trans	6.63E-06	1.72E-06	1.91E-08	7.42E-06	1.91E-07	4.40E-07	7.28E-06	1
OG0000493	Ins145_P3_rec	MIR	5.28E-06	1.57E-06	2.01E-08	1.74E-05	1.42E-04	5.81E-06	3.44E-04	1
OG0000493	Ins145_P3_rec	RIH_assoc	3.31E-06	8.46E-07	8.51E-09	3.32E-06	1.69E-08	1.45E-08	1.13E-06	1
OG0000493	Ins145_P3_rec	RYDR_ITPR	3.37E-06	1.10E-06	1.25E-08	5.15E-06	5.69E-08	2.87E-08	1.04E-05	1
OG0000493	MIR	Ion_trans	6.88E-06	1.84E-06	2.04E-07	8.58E-04	0.0115985076	4.81E-04	2.90E-02	1
OG0000493	MIR	RIH_assoc	5.84E-06	1.70E-06	2.11E-08	1.62E-05	1.18E-04	4.71E-06	2.69E-04	1
OG0000493	MIR	RYDR_ITPR	5.51E-06	1.63E-06	2.11E-08	1.94E-05	1.68E-04	6.85E-06	4.05E-04	1
OG0000493	RIH_assoc	Ion_trans	3.94E-06	1.08E-06	1.17E-08	4.94E-06	1.34E-07	3.44E-07	6.09E-06	1
OG0000493	RYDR_ITPR	Ion_trans	6.62E-06	1.72E-06	1.92E-08	8.80E-06	1.78E-05	4.99E-07	1.03E-05	1
OG0000493	RYDR_ITPR	RIH_assoc	3.75E-06	1.07E-06	1.16E-08	4.84E-06	4.85E-08	5.97E-09	1.30E-06	1
OG0000496	CENP-B_N	DDE_1	9.12E-01	4.87E-02	2.47E-02	4.55E-03	4.56E-04	2.33E-05	4.03E-05	0
OG0000496	CENP-B_N	HTH_Tnp_Tc5	8.85E-01	7.07E-02	3.66E-02	6.76E-03	6.73E-04	3.20E-05	5.53E-05	1
OG0000496	HTH_Tnp_Tc5	DDE_1	7.55E-03	5.41E-01	3.50E-01	6.67E-02	3.08E-02	1.25E-03	2.16E-03	1
OG0000501	Arrestin_N	Arrestin_C	6.17E-01	1.69E-01	9.84E-02	1.85E-02	8.68E-02	3.52E-03	6.06E-03	1
OG0000504	zf-UBR	ClpS	7.03E-06	1.92E-06	2.68E-08	3.09E-05	5.38E-02	2.21E-03	2.97E-02	1
OG0000506	Ank_2	Patatin	0.9224916771	0.0481761387	0.0243506194	0.0044955038	4.50E-04	2.30E-05	3.99E-05	0
OG0000506	Ank_5	Patatin	0.8747422235	0.0429246801	0.0216173781	0.0039921678	4.01E-04	2.10E-05	3.65E-05	1
OG0000507	PLAT	Lipoxygenase	8.74E-01	5.38E-02	2.75E-02	5.08E-03	5.07E-04	2.53E-05	4.38E-05	1
OG0000513	BCDHK_Adom3	HATPase_c	5.24E-11	6.47E-13	0	5.88E-13	4.00E-09	2.16E-08	4.88E-07	1
OG0000514	RNase_PH	RNase_PH_C	4.01E-03	8.73E-07	2.29E-08	1.19E-06	6.36E-06	1.45E-08	2.06E-06	1
OG0000515	La	RRM_1	6.58E-05	1.87E-06	2.17E-08	1.20E-06	7.85E-08	1.94E-08	1.73E-05	1
OG0000515	La	RRM_3	1.06E-06	2.51E-07	6.92E-09	1.06E-07	1.03E-07	2.88E-07	1.06E-03	1
OG0000515	RRM_1	RRM_3	6.28E-05	1.91E-06	4.17E-08	4.88E-05	4.00E-05	1.37E-04	1.14E-01	1
OG0000516	Pkinase	HGTP_anticodon2	0.0042114805	1.89E-06	7.77E-08	3.29E-06	1.79E-04	6.96E-06	2.77E-03	1
OG0000516	Pkinase	tRNA-synt_His	4.51E-03	2.07E-06	6.93E-06	1.30E-06	9.51E-08	5.56E-08	1.27E-04	1
OG0000516	RWD	Pkinase	0.0045657686	2.03E-06	2.19E-08	1.39E-06	6.98E-06	1.05E-08	6.23E-06	1
OG0000516	RWD	tRNA-synt_His	0.0045158644	2.07E-06	6.96E-06	1.40E-06	8.16E-06	5.74E-08	1.28E-04	1
OG0000516	tRNA-synt_His	HGTP_anticodon2	0.0042146742	2.01E-06	1.25E-05	7.93E-05	7.06E-03	2.85E-04	1.14E-01	1
OG0000525	Amidohydro_1	OTCace	0.879405387	4.29E-02	2.16E-02	3.98E-03	3.93E-04	2.04E-05	5.32E-02	1
OG0000525	Amidohydro_1	OTCace_N	8.79E-01	4.29E-02	2.16E-02	3.98E-03	3.93E-04	2.04E-05	5.32E-02	1
OG0000525	CPSase_L_D2	Amidohydro_1	0.8793904803	4.30E-02	2.16E-02	3.99E-03	3.94E-04	2.04E-05	5.33E-02	1
OG0000525	CPSase_L_D2	CPSase_L_D3	1.54E-08	8.78E-10	1.88E-12	2.17E-10	1.04E-07	1.49E-09	2.54E-06	1
OG0000525	CPSase_L_D2	MGS	3.69E-07	1.02E-07	3.46E-09	1.84E-08	3.51E-06	9.69E-08	4.13E-04	1
OG0000525	CPSase_L_D2	OTCace	7.23E-06	2.02E-06	2.23E-08	4.36E-06	7.44E-03	3.01E-04	7.84E-01	1
OG0000525	CPSase_L_D2	OTCace_N	7.23E-06	2.02E-06	2.23E-08	4.36E-06	7.44E-03	3.01E-04	7.84E-01	1
OG0000525	CPSase_L_D3	Amidohydro_1	0.8793904803	0.0429853355	0.0216269333	0.0039869833	3.94E-04	2.04E-05	5.33E-02	1
OG0000525	CPSase_L_D3	CPSase_L_D2	7.22E-08	3.02E-09	2.23E-11	3.41E-10	1.25E-07	1.60E-09	2.60E-06	1
OG0000525	CPSase_L_D3	MGS	7.11E-07	1.67E-07	4.69E-09	2.23E-08	4.07E-06	1.04E-07	4.19E-04	1
OG0000525	CPSase_L_D3	OTCace	7.23E-06	2.02E-06	2.23E-08	4.36E-06	7.44E-03	3.01E-04	7.84E-01	1
OG0000525	CPSase_L_D3	OTCace_N	7.23E-06	2.02E-06	2.23E-08	4.36E-06	7.44E-03	3.01E-04	7.84E-01	1
OG0000525	CPSase_sm_chain	Amidohydro_1	0.8056958487	0.0392435455	0.0197491127	0.0036437604	3.61E-04	1.91E-05	4.99E-02	1
OG0000525	CPSase_sm_chain	CPSase_L_D2	4.87E-07	1.80E-08	2.12E-10	5.75E-09	1.10E-06	3.37E-09	6.94E-06	1
OG0000525	CPSase_sm_chain	CPSase_L_D3	4.87E-07	1.80E-08	2.12E-10	5.75E-09	1.10E-06	3.37E-09	6.94E-06	1
OG0000525	CPSase_sm_chain	GATase	2.12E-07	4.90E-09	5.97E-12	2.37E-10	1.09E-07	1.57E-09	2.93E-06	1
OG0000525	CPSase_sm_chain	MGS	4.30E-06	6.50E-07	1.44E-08	5.77E-08	1.41E-05	3.91E-07	1.14E-03	1
OG0000525	CPSase_sm_chain	OTCace	7.63E-05	2.03E-06	2.24E-08	4.39E-06	7.48E-03	3.02E-04	7.84E-01	1
OG0000525	CPSase_sm_chain	OTCace_N	7.63E-05	2.03E-06	2.24E-08	4.39E-06	7.48E-03	3.02E-04	7.84E-01	1
OG0000525	GATase	Amidohydro_1	8.06E-01	3.92E-02	1.97E-02	3.64E-03	3.61E-04	1.91E-05	4.99E-02	1
OG0000525	GATase	CPSase_L_D2	8.59E-08	5.04E-09	7.51E-11	5.25E-09	1.04E-06	3.07E-09	5.51E-06	1
OG0000525	GATase	CPSase_L_D3	8.59E-08	5.04E-09	7.51E-11	5.25E-09	1.04E-06	3.07E-09	5.51E-06	1
OG0000525	GATase	MGS	1.47E-06	3.36E-07	8.67E-09	3.97E-08	9.24E-06	2.61E-07	8.65E-04	1
OG0000525	GATase	OTCace	7.24E-06	2.03E-06	2.24E-08	4.38E-06	7.48E-03	3.02E-04	7.84E-01	1
OG0000525	GATase	OTCace_N	7.24E-06	2.03E-06	2.24E-08	4.38E-06	7.48E-03	3.02E-04	7.84E-01	1
OG0000525	MGS	Amidohydro_1	8.80E-01	4.29E-02	2.16E-02	3.98E-03	3.93E-04	2.04E-05	5.33E-02	1
OG0000525	MGS	OTCace	7.23E-06	2.02E-06	2.23E-08	4.36E-06	7.44E-03	3.01E-04	7.84E-01	1
OG0000525	MGS	OTCace_N	7.23E-06	2.02E-06	2.23E-08	4.36E-06	7.44E-03	3.01E-04	7.84E-01	1
OG0000525	OTCace_N	OTCace	7.19E-06	2.01E-06	2.12E-08	7.12E-08	6.84E-06	9.85E-09	6.21E-06	1
OG0000526	HTH_Tnp_Tc5	DDE_1	9.01E-01	4.46E-02	2.25E-02	4.15E-03	4.16E-04	2.17E-05	3.76E-05	0
OG0000527	ACBP	Ank_2	1.18E-02	3.68E-04	2.03E-06	2.64E-03	1.40E-04	5.39E-06	1.90E-03	1
OG0000528	Syntaxin	SNARE	6.61E-06	1.05E-07	6.88E-10	2.03E-09	2.99E-09	1.68E-09	1.06E-06	1
OG0000534	Gp_dh_N	Gp_dh_C	3.70E-05	1.71E-07	2.89E-11	1.16E-10	1.98E-10	1.36E-08	8.13E-07	1
OG0000536	PH	Oxysterol_BP	4.84E-06	2.64E-06	8.07E-05	3.75E-01	3.73E-02	1.29E-01	2.26E-01	1
OG0000537	Chromo	Pre-SET	0.0368918784	0.0015981183	6.32E-04	9.05E-03	8.18E-01	3.30E-02	5.67E-02	1
OG0000537	Chromo	SET	0.0368918784	0.0015981183	6.32E-04	9.05E-03	8.18E-01	3.30E-02	5.67E-02	1
OG0000537	Pre-SET	SET	0.0048658446	3.19E-04	2.38E-08	9.32E-07	6.09E-06	1.45E-08	2.85E-06	1
OG0000539	Thioredoxin	Glutaredoxin	7.20E-06	2.01E-06	2.12E-08	6.74E-08	1.64E-07	2.93E-07	7.46E-04	1
OG0000541	Exostosin	Glyco_transf_64	0.8577358585	0.0872512676	0.0457057414	0.0084585832	8.39E-04	3.87E-05	6.69E-05	1
OG0000542	AMP-binding	AMP-binding_C	4.35E-07	1.73E-08	1.64E-14	3.72E-12	8.01E-13	2.62E-10	1.08E-06	1
OG0000542	AMP-binding_C	NAD_binding_4	4.26E-05	3.44E-07	1.65E-10	2.41E-08	8.08E-10	3.21E-09	1.07E-05	1
OG0000542	AMP-binding_C	PP-binding	1.64E-05	6.08E-08	8.36E-14	8.90E-12	1.71E-12	6.91E-10	1.14E-06	1
OG0000542	AMP-binding	NAD_binding_4	3.80E-05	2.54E-07	2.89E-11	3.70E-09	5.52E-11	8.89E-10	2.19E-06	1
OG0000542	AMP-binding	PP-binding	6.59E-06	1.78E-08	2.06E-15	1.41E-13	2.32E-14	1.43E-10	4.20E-07	1
OG0000542	Condensation	AMP-binding	4.72E-05	6.73E-07	3.84E-09	1.58E-07	2.90E-08	9.13E-08	5.44E-06	1
OG0000542	PP-binding	NAD_binding_4	3.75E-05	2.42E-07	8.84E-12	9.49E-10	2.32E-11	1.94E-09	2.82E-06	1
OG0000545	IBN_N	Xpo1	1.88E-04	3.79E-04	3.13E-08	4.64E-05	8.05E-02	3.29E-03	5.68E-03	1
OG0000546	HSNSD	Sulfotransfer_1	9.24E-01	4.62E-02	2.33E-02	4.30E-03	4.31E-04	2.22E-05	3.86E-05	0
OG0000548	Thioredoxin_6	Thioredoxin	3.45E-10	3.22E-10	1.86E-11	4.15E-10	9.88E-10	4.59E-10	1.22E-06	1
OG0000548	Thioredoxin	Thioredoxin_6	2.66E-10	2.98E-10	1.86E-11	4.13E-10	9.82E-10	4.56E-10	1.23E-06	1
OG0000549	Glyco_transf_8	Glyco_transf_49	2.72E-05	6.23E-04	5.96E-02	8.46E-01	8.30E-02	3.36E-03	5.76E-03	1
OG0000552	GST_N_3	GST_C_2	0.0492710786	0.0027796251	0.0012324254	1.35E-04	1.26E-02	5.10E-04	8.54E-04	1
OG0000553	STPPase_N	Metallophos	2.80E-10	1.98E-11	0	4.39E-13	3.38E-11	7.70E-10	1.83E-06	1
OG0000555	Filament	LTD	0.920158414	0.0453545021	0.0228417475	4.22E-03	4.23E-04	2.19E-05	3.80E-05	0
OG0000557	LisH	CLTH	4.26E-03	1.94E-06	3.46E-06	9.70E-03	8.78E-01	3.55E-02	0.0608798521	1
OG0000557	SPRY	CLTH	6.98E-06	2.00E-06	2.26E-08	6.00E-06	4.64E-04	1.86E-05	6.06E-04	1
OG0000557	SPRY	LisH	4.26E-03	1.94E-06	3.46E-06	9.70E-03	8.78E-01	3.55E-02	6.09E-02	1
OG0000560	DEAD	DSHCT	1.81E-08	7.50E-10	8.73E-14	2.31E-12	8.43E-11	2.51E-10	5.25E-07	1
OG0000560	DEAD	Helicase_C	3.13E-08	1.18E-09	5.30E-13	9.51E-11	6.02E-10	1.32E-09	7.10E-07	1
OG0000560	DEAD	rRNA_proc-arch	2.01E-08	8.82E-10	3.75E-13	2.69E-11	1.62E-10	3.08E-10	6.18E-07	1
OG0000560	Helicase_C	DSHCT	2.05E-08	8.76E-10	3.32E-13	2.29E-11	6.92E-11	1.14E-09	6.33E-07	1
OG0000560	Helicase_C	rRNA_proc-arch	2.17E-08	9.56E-10	6.79E-13	5.10E-10	1.11E-10	1.32E-09	8.55E-07	1
OG0000560	rRNA_proc-arch	DSHCT	7.48E-09	4.41E-10	3.66E-14	4.95E-12	1.40E-11	2.17E-10	5.67E-07	1
OG0000566	DUF3548	RabGAP-TBC	0.0124427664	3.88E-04	1.14E-06	1.39E-03	1.71E-05	4.18E-07	1.28E-04	1
OG0000570	Glycohydro_20b2	Glyco_hydro_20	4.27E-08	2.06E-07	7.72E-09	3.25E-07	2.09E-08	2.21E-09	1.80E-06	1
OG0000572	ERGIC_N	COPIIcoated_ERV	1.38E-09	2.76E-10	1.16E-12	1.58E-11	7.54E-11	1.24E-10	6.03E-07	1
OG0000573	DOCK-C2	DHR-2	4.07E-06	1.28E-06	1.45E-08	4.75E-06	1.85E-08	3.36E-09	2.31E-06	1
OG0000573	DUF3398	DHR-2	7.21E-06	6.82E-06	4.62E-04	5.98E-01	5.86E-02	2.37E-03	2.70E-01	1
OG0000573	DUF3398	DOCK-C2	6.51E-06	2.67E-06	6.66E-05	8.64E-02	9.39E-02	3.80E-03	6.45E-01	1
OG0000573	DUF3398	PH	0.8441285236	0.0411406076	0.0207137178	0.0038264857	3.85E-04	2.04E-05	3.54E-05	1
OG0000573	PH	DOCK-C2	0.8441991137	0.0411599377	0.0207239509	0.0038283752	3.85E-04	2.04E-05	3.54E-05	1
OG0000574	UBA_4	Cullin_binding	0.0045717926	2.02E-06	2.18E-08	1.30E-06	8.45E-08	1.85E-08	6.33E-06	1
OG0000575	MA3	W2	0.0042930479	2.08E-06	1.40E-05	3.96E-02	0.0037705232	1.29E-02	0.7469305835	1
OG0000575	MIF4G	MA3	9.09E-06	4.09E-07	3.83E-09	2.50E-07	1.48E-08	8.17E-08	4.87E-04	1
OG0000575	MIF4G	W2	4.44E-03	2.17E-06	1.40E-05	3.96E-02	3.77E-03	1.28E-02	7.47E-01	1
OG0000577	Dimerisation2	Methyltransf_2	6.58E-04	1.76E-03	6.93E-04	2.67E-02	0.002507272	1.01E-04	0.2943762475	1
OG0000578	Acyltransferase	Acyltransf_C	4.46E-11	1.81E-12	4.52E-14	2.81E-09	6.93E-10	1.30E-09	3.07E-06	1
OG0000584	EF-hand_7	EF-hand_5	0.0121952698	3.85E-04	7.90E-06	1.86E-05	3.41E-05	1.11E-06	0.0021531406	1
OG0000584	EF-hand_8	EF-hand_5	4.03E-04	9.60E-04	2.86E-04	8.10E-01	0.1673465433	6.77E-03	0.0116023718	1
OG0000584	EF-hand_8	EF-hand_7	0.0045846439	2.15E-06	1.15E-05	0.0157562132	8.72E-01	3.53E-02	6.05E-02	1
OG0000585	tRNA-synt_1b	tRNA_bind	1.54E-04	2.06E-06	2.07E-06	0.0027524199	2.49E-01	1.01E-02	5.84E-01	1
OG0000587	THF_DHG_CYH_C	FTHFS	7.22E-06	2.03E-06	1.34E-07	5.09E-04	8.85E-01	3.60E-02	6.23E-02	1
OG0000587	THF_DHG_CYH	FTHFS	7.22E-06	2.03E-06	1.34E-07	5.09E-04	8.85E-01	3.60E-02	0.0623137575	1
OG0000587	THF_DHG_CYH	THF_DHG_CYH_C	5.70E-07	3.66E-07	4.57E-09	1.46E-08	1.72E-08	1.82E-09	6.87E-07	1
OG0000590	DnaJ	DnaJ_C	4.59E-10	1.04E-10	8.36E-13	2.29E-10	3.75E-11	2.06E-08	1.24E-06	1
OG0000594	DUF21	CBS	5.75E-06	1.32E-06	1.27E-08	1.29E-06	7.69E-08	1.02E-07	3.36E-06	1
OG0000595	RRM_1	PABP	3.30E-06	1.05E-06	1.12E-08	3.66E-08	4.52E-08	6.14E-09	3.50E-06	1
OG0000596	Pribosyltran_N	Pribosyl_synth	5.59E-10	2.20E-11	0	9.15E-15	1.38E-12	5.12E-11	4.68E-07	1
OG0000602	PAH	Sin3a_C	6.95E-06	1.93E-06	2.02E-08	6.84E-08	6.63E-06	1.04E-08	6.91E-06	1
OG0000602	PAH	Sin3_corepress	6.38E-06	1.75E-06	1.81E-08	6.21E-08	6.07E-06	9.43E-09	5.79E-06	1
OG0000602	Sin3_corepress	Sin3a_C	6.90E-06	1.91E-06	1.99E-08	6.75E-08	6.53E-06	9.91E-09	5.82E-06	1
OG0000603	BCS1_N	AAA	1.36E-04	2.19E-04	8.08E-09	5.20E-08	2.73E-09	5.10E-10	3.16E-06	1
OG0000605	Glutaredoxin	Pyr_redox_2	0.4508526397	0.0218783121	0.0109109119	0.1557723832	3.22E-01	1.30E-02	2.23E-02	1
OG0000605	Glutaredoxin	Pyr_redox_dim	4.51E-01	2.19E-02	1.09E-02	1.56E-01	0.3216981357	0.0130065743	0.0223017793	1
OG0000605	Pyr_redox_2	Pyr_redox_dim	2.47E-10	1.73E-11	1.52E-15	3.09E-12	3.50E-12	1.95E-10	1.64E-07	1
OG0000607	EF-hand_7	CH	7.14E-06	1.99E-06	2.38E-08	3.02E-06	0.0013542885	0.0093496368	0.2621585621	1
OG0000610	Disintegrin	ADAM17_MPD	8.45E-01	4.13E-02	2.08E-02	3.84E-03	3.86E-04	2.04E-05	3.55E-05	1
OG0000610	Pep_M12B_propep	ADAM17_MPD	0.903037224	0.0456637663	0.0230364926	0.0042533107	4.27E-04	2.21E-05	3.83E-05	0
OG0000610	Pep_M12B_propep	Disintegrin	2.65E-06	4.04E-06	2.47E-04	0.8987579258	8.94E-02	3.64E-03	6.31E-03	1
OG0000610	Pep_M12B_propep	Reprolysin_2	0.0073919369	0.5631226139	0.3548284474	0.0672148917	6.61E-03	2.72E-04	4.68E-04	1
OG0000610	Pep_M12B_propep	Reprolysin_5	2.58E-05	1.39E-06	1.61E-04	0.8909464629	9.55E-02	4.05E-03	7.35E-03	1
OG0000610	Reprolysin_2	Disintegrin	0.0562048894	0.0984258439	0.0503441634	0.7162611028	0.0702875282	2.85E-03	4.88E-03	1
OG0000610	Reprolysin_5	ADAM17_MPD	0.9254372768	0.0459814849	0.0231686906	0.0042766842	4.29E-04	2.22E-05	3.84E-05	0
OG0000610	Reprolysin_5	Disintegrin	3.77E-05	3.48E-06	1.79E-04	0.8922349948	9.45E-02	3.98E-03	7.18E-03	1
OG0000612	2OG-FeII_Oxy_2	Methyltransf_11	0.0151120899	5.18E-04	6.71E-05	1.45E-03	2.40E-05	6.99E-07	1.94E-05	1
OG0000614	GRAM	DUF4782	5.93E-06	1.44E-06	1.37E-08	4.50E-07	5.11E-08	6.78E-09	3.93E-06	1
OG0000615	BIR	zf-C3HC4_3	0.8839859998	0.0711084271	0.0368043405	6.80E-03	6.77E-04	3.22E-05	5.56E-05	1
OG0000616	PWWP	SET	6.26E-05	0.0017529448	6.87E-04	0.8876935805	0.0870784821	0.0035231258	0.006038784	1
OG0000616	SET	BAH	9.69E-05	8.58E-05	8.09E-03	8.91E-01	8.74E-02	3.54E-03	6.06E-03	1
OG0000616	SET	SRI	7.26E-06	2.04E-06	1.93E-07	5.11E-04	0.8854411316	0.0358989309	0.0617934858	1
OG0000616	SET	WW	2.10E-04	3.95E-04	2.26E-06	1.01E-02	8.77E-01	3.55E-02	6.09E-02	1
OG0000616	WW	SRI	2.11E-04	3.95E-04	2.41E-06	1.01E-02	8.77E-01	3.55E-02	6.09E-02	1
OG0000617	SMP_LBD	C2	1.98E-05	4.06E-04	8.54E-06	0.0240618972	2.24E-03	7.65E-03	1.31E-02	1
OG0000618	FYRC	SET	1.95E-04	4.04E-04	9.56E-06	0.0103463369	8.98E-04	3.06E-03	5.24E-03	1
OG0000618	FYRN	FYRC	2.09E-04	4.08E-04	9.58E-06	0.0103542126	8.98E-04	3.06E-03	5.24E-03	1
OG0000618	FYRN	SET	1.06E-04	3.92E-04	2.59E-06	1.03E-02	8.98E-04	3.06E-03	0.0052405682	1
OG0000618	N-SET	SET	3.89E-02	1.70E-03	6.66E-04	9.42E-03	8.53E-01	3.45E-02	0.0591028209	1
OG0000618	PHD	FYRN	0.03467335	0.00147665	5.56E-04	0.2721700975	0.0266168702	0.0907051301	1.56E-01	1
OG0000618	PHD	SET	4.37E-04	4.10E-04	1.01E-05	4.80E-03	3.53E-04	1.20E-03	2.04E-03	1
OG0000618	RRM_1	N-SET	6.52E-02	2.97E-03	1.32E-03	1.88E-02	8.05E-01	3.25E-02	5.58E-02	1
OG0000618	RRM_1	SET	0.0045990225	2.78E-06	7.29E-05	9.37E-04	8.45E-02	0.2878761282	0.4954594084	1
OG0000618	zf-HC5HC2H	FYRC	3.99E-04	9.48E-04	2.80E-04	3.05E-01	2.98E-02	1.02E-01	0.1747942047	1
OG0000618	zf-HC5HC2H	FYRN	2.06E-04	9.44E-04	2.80E-04	3.05E-01	0.0298451281	0.1017048968	0.1748312148	1
OG0000618	zf-HC5HC2H	SET	1.09E-04	3.94E-04	2.98E-06	3.15E-03	1.91E-04	6.49E-04	0.0010953512	1
OG0000622	ADH_N_2	ADH_zinc_N	1.68E-05	2.61E-07	2.18E-09	3.84E-08	6.70E-09	1.00E-09	5.08E-07	1
OG0000624	ABC_membrane	ABC_tran	4.22E-08	8.00E-10	1.18E-14	8.37E-13	3.01E-12	1.02E-10	6.11E-07	1
OG0000624	MTABC_N	ABC_membrane	7.25E-06	2.85E-06	7.81E-05	3.54E-01	5.73E-01	2.32E-02	3.98E-02	1
OG0000624	MTABC_N	ABC_tran	7.64E-05	2.85E-06	7.81E-05	3.54E-01	5.73E-01	2.32E-02	3.98E-02	1
OG0000625	Voltage_CLC	CBS	6.88E-08	9.51E-09	4.36E-10	1.13E-06	7.39E-10	2.91E-09	1.59E-04	1
OG0000626	ALIX_LYPXL_bnd	Y_phosphatase	1.83E-02	5.67E-01	2.85E-01	5.21E-02	5.12E-03	2.12E-04	3.63E-04	1
OG0000626	BRO1	ALIX_LYPXL_bnd	6.99E-09	6.86E-10	2.28E-12	4.82E-11	1.11E-07	2.70E-09	4.74E-06	1
OG0000626	BRO1	PDZ	0.0195999898	0.6056551406	0.3038079537	0.0556450719	5.47E-03	2.26E-04	3.87E-04	1
OG0000626	BRO1	Y_phosphatase	0.0183228069	0.5674595466	0.2846239315	0.052132659	0.0051213636	2.12E-04	3.63E-04	1
OG0000627	GST_N	GST_C	1.87E-02	4.14E-02	2.16E-02	3.08E-01	3.02E-02	1.22E-03	7.08E-02	1
OG0000628	ADK	ADK_lid	4.35E-09	4.32E-10	3.81E-13	1.02E-12	1.27E-11	2.80E-10	8.21E-07	1
OG0000634	GBP	GBP_C	4.47E-03	3.71E-06	5.29E-04	9.71E-07	3.36E-04	1.33E-05	1.82E-06	1
OG0000637	DUF4062	NACHT	3.38E-02	5.44E-01	3.03E-01	5.65E-02	5.55E-03	2.29E-04	3.94E-04	1
OG0000637	DUF4062	WD40	5.28E-02	5.73E-01	2.91E-01	5.34E-02	5.24E-03	2.17E-04	3.72E-04	1
OG0000641	SNF2_N	Helicase_C	4.21E-10	1.10E-11	1.87E-15	5.39E-13	6.48E-13	5.18E-11	1.28E-07	1
OG0000644	RNA_pol_Rpb2_1	RNA_pol_Rpb2_2	5.51E-09	4.87E-10	3.15E-14	2.94E-12	9.89E-11	2.84E-10	5.75E-07	1
OG0000644	RNA_pol_Rpb2_1	RNA_pol_Rpb2_3	5.78E-09	4.67E-10	2.76E-14	2.71E-12	9.14E-11	2.67E-10	5.65E-07	1
OG0000644	RNA_pol_Rpb2_1	RNA_pol_Rpb2_4	4.84E-09	4.68E-10	6.48E-14	2.97E-12	9.82E-11	2.82E-10	5.74E-07	1
OG0000644	RNA_pol_Rpb2_1	RNA_pol_Rpb2_5	5.30E-09	5.28E-10	8.24E-14	3.56E-12	1.13E-10	3.13E-10	5.94E-07	1
OG0000644	RNA_pol_Rpb2_1	RNA_pol_Rpb2_6	6.17E-09	5.14E-10	6.86E-14	3.05E-12	1.01E-10	2.88E-10	5.78E-07	1
OG0000644	RNA_pol_Rpb2_1	RNA_pol_Rpb2_7	6.47E-09	5.49E-10	7.51E-14	3.44E-12	1.09E-10	3.06E-10	5.89E-07	1
OG0000644	RNA_pol_Rpb2_2	RNA_pol_Rpb2_3	7.92E-09	4.98E-10	2.19E-14	6.94E-13	1.06E-11	2.36E-10	5.51E-07	1
OG0000644	RNA_pol_Rpb2_2	RNA_pol_Rpb2_4	5.67E-09	4.67E-10	5.10E-14	7.54E-13	1.13E-11	2.47E-10	5.58E-07	1
OG0000644	RNA_pol_Rpb2_2	RNA_pol_Rpb2_5	6.00E-09	5.06E-10	5.66E-14	8.68E-13	1.25E-11	2.66E-10	5.71E-07	1
OG0000644	RNA_pol_Rpb2_2	RNA_pol_Rpb2_6	8.36E-09	5.42E-10	5.52E-14	7.75E-13	1.16E-11	2.52E-10	5.61E-07	1
OG0000644	RNA_pol_Rpb2_2	RNA_pol_Rpb2_7	8.82E-09	5.85E-10	6.09E-14	8.88E-13	1.28E-11	2.71E-10	5.73E-07	1
OG0000644	RNA_pol_Rpb2_3	RNA_pol_Rpb2_4	5.12E-09	4.21E-10	4.21E-14	6.81E-13	1.03E-11	2.30E-10	5.47E-07	1
OG0000644	RNA_pol_Rpb2_3	RNA_pol_Rpb2_5	6.16E-09	5.13E-10	5.71E-14	8.73E-13	1.26E-11	2.67E-10	5.71E-07	1
OG0000644	RNA_pol_Rpb2_3	RNA_pol_Rpb2_6	5.51E-09	4.36E-10	4.31E-14	6.91E-13	1.04E-11	2.33E-10	5.49E-07	1
OG0000644	RNA_pol_Rpb2_3	RNA_pol_Rpb2_7	5.87E-09	4.79E-10	4.84E-14	8.07E-13	1.17E-11	2.53E-10	5.62E-07	1
OG0000644	RNA_pol_Rpb2_4	RNA_pol_Rpb2_5	4.83E-09	4.66E-10	5.40E-14	8.47E-13	1.22E-11	2.62E-10	5.68E-07	1
OG0000644	RNA_pol_Rpb2_4	RNA_pol_Rpb2_6	5.51E-09	4.36E-10	4.31E-14	6.91E-13	1.04E-11	2.33E-10	5.49E-07	1
OG0000644	RNA_pol_Rpb2_4	RNA_pol_Rpb2_7	5.87E-09	4.79E-10	4.84E-14	8.07E-13	1.17E-11	2.53E-10	5.62E-07	1
OG0000644	RNA_pol_Rpb2_5	RNA_pol_Rpb2_6	5.74E-09	4.96E-10	5.58E-14	8.61E-13	1.24E-11	2.65E-10	5.70E-07	1
OG0000644	RNA_pol_Rpb2_5	RNA_pol_Rpb2_7	6.16E-09	5.13E-10	5.71E-14	8.73E-13	1.26E-11	2.67E-10	5.71E-07	1
OG0000644	RNA_pol_Rpb2_6	RNA_pol_Rpb2_7	3.82E-09	3.71E-10	3.63E-14	6.67E-13	9.73E-12	2.18E-10	4.90E-07	1
OG0000646	Cation_ATPase	Cation_ATPase_C	1.67E-07	5.87E-09	5.68E-11	1.41E-09	1.73E-10	4.72E-09	2.91E-06	1
OG0000646	Cation_ATPase_N	Cation_ATPase	1.97E-07	7.02E-09	7.13E-11	1.91E-09	2.08E-10	5.01E-09	3.32E-06	1
OG0000646	Cation_ATPase_N	Cation_ATPase_C	6.09E-08	1.30E-09	3.27E-13	1.20E-10	3.71E-11	2.45E-09	6.56E-07	1
OG0000646	Cation_ATPase_N	E1-E2_ATPase	4.15E-09	2.19E-10	6.63E-14	4.68E-11	1.33E-11	2.63E-10	5.36E-07	1
OG0000646	E1-E2_ATPase	Cation_ATPase	1.89E-07	6.40E-09	6.05E-11	1.47E-09	1.76E-10	4.62E-09	2.89E-06	1
OG0000646	E1-E2_ATPase	Cation_ATPase_C	5.68E-08	1.17E-09	2.56E-13	8.55E-11	3.00E-11	2.19E-09	5.73E-07	1
OG0000648	Cation_ATPase_N	E1-E2_ATPase	0.0045252707	2.11E-06	7.52E-06	9.36E-06	7.25E-04	2.91E-05	3.59E-04	1
OG0000648	Cation_ATPase_N	HAD	0.0045252707	2.11E-06	7.52E-06	9.36E-06	7.25E-04	2.91E-05	3.59E-04	1
OG0000648	E1-E2_ATPase	HAD	8.43E-07	3.47E-07	3.35E-09	1.10E-08	1.25E-06	1.02E-08	8.00E-07	1
OG0000648	P5-ATPase	Cation_ATPase_N	0.0117499405	3.57E-04	0.0342136474	6.18E-03	5.58E-01	2.25E-02	2.95E-01	1
OG0000648	P5-ATPase	E1-E2_ATPase	3.42E-06	1.42E-06	2.97E-06	5.02E-08	5.96E-06	5.45E-08	6.53E-06	1
OG0000648	P5-ATPase	HAD	3.42E-06	1.42E-06	2.97E-06	5.02E-08	5.96E-06	5.45E-08	6.53E-06	1
OG0000651	NAD_binding_2	NAD_binding_11	2.14E-07	4.64E-09	1.30E-12	7.98E-12	1.38E-11	1.52E-10	1.03E-07	1
OG0000652	6PF2K	His_Phos_1	1.32E-07	9.21E-10	6.22E-15	1.41E-12	1.68E-11	2.24E-10	1.05E-06	1
OG0000655	GAF_2	PDEase_I	2.31E-02	9.27E-04	2.93E-04	8.55E-01	8.39E-02	3.39E-03	5.82E-03	1
OG0000655	GAF	PDEase_I	7.00E-07	8.56E-07	1.01E-05	4.96E-02	5.95E-02	2.42E-01	5.08E-01	1
OG0000658	AAA_11	AAA_12	7.43E-07	6.02E-07	1.79E-08	4.72E-07	3.95E-08	2.45E-08	4.53E-06	1
OG0000660	SapA	SapB_1	0.9041224437	4.68E-02	2.36E-02	4.37E-03	4.38E-04	2.25E-05	3.90E-05	0
OG0000660	SapA	SapB_2	0.9041224437	4.68E-02	2.36E-02	4.37E-03	4.38E-04	2.25E-05	3.90E-05	0
OG0000660	SapB_1	SapB_2	9.63E-06	8.83E-06	2.13E-03	4.17E-04	2.23E-08	2.67E-09	3.51E-05	1
OG0000660	SapB_2	SapB_1	2.42E-05	1.75E-05	3.83E-03	7.17E-04	4.71E-08	1.79E-08	1.13E-04	1
OG0000665	PALP	CBS	4.94E-06	6.69E-07	1.43E-08	6.16E-07	1.70E-05	5.63E-07	1.74E-03	1
OG0000666	C2	FerA	0.9116454162	4.78E-02	2.41E-02	4.46E-03	4.47E-04	2.29E-05	3.97E-05	0
OG0000666	C2	FerB	0.0011629115	0.007724801	0.8195764975	0.1544462824	1.52E-02	6.19E-04	1.06E-03	1
OG0000666	C2	FerI	0.0770795348	7.56E-03	7.60E-01	1.41E-01	1.39E-02	5.65E-04	9.70E-04	1
OG0000666	C2	Ferlin_C	8.29E-04	0.0061701054	0.6654325987	0.1259325503	1.24E-02	4.25E-02	7.32E-02	1
OG0000666	FerA	C2	0.9038231314	5.18E-02	2.63E-02	4.86E-03	4.86E-04	2.45E-05	4.24E-05	0
OG0000666	FerA	FerB	0.9005495394	4.94E-02	2.50E-02	4.62E-03	4.63E-04	2.35E-05	4.08E-05	0
OG0000666	FerA	Ferlin_C	8.82E-01	4.32E-02	2.17E-02	4.02E-03	4.03E-04	2.11E-05	3.67E-05	1
OG0000666	FerB	C2	1.07E-03	7.63E-03	8.19E-01	1.55E-01	1.52E-02	6.21E-04	1.07E-03	1
OG0000666	FerB	Ferlin_C	0.001366172	0.0078991759	0.8201122779	0.1536351518	1.51E-02	6.15E-04	1.06E-03	1
OG0000666	FerI	C2	0.0780900577	0.0075559225	0.7596809752	0.1410201405	1.38E-02	5.65E-04	9.69E-04	1
OG0000666	FerI	FerA	0.9036307585	0.0445894437	0.0224600167	0.0041466441	4.16E-04	2.16E-05	3.75E-05	0
OG0000666	FerI	FerB	9.15E-02	7.52E-03	7.49E-01	1.39E-01	1.36E-02	5.55E-04	9.52E-04	1
OG0000666	FerI	Ferlin_C	0.1151889122	7.44E-03	7.31E-01	1.35E-01	1.32E-02	5.39E-04	9.24E-04	1
OG0000673	Clat_adaptor_s	Adap_comp_sub	3.30E-08	9.37E-09	4.53E-13	5.30E-12	1.43E-10	4.07E-10	1.34E-06	1
OG0000676	HLH	Hairy_orange	8.21E-01	1.09E-01	5.82E-02	1.08E-02	1.07E-03	4.81E-05	8.29E-05	1
OG0000677	MIR	PMT_4TMC	5.86E-08	3.98E-10	5.62E-12	2.55E-06	4.97E-02	9.77E-02	6.32E-01	1
OG0000677	PMT	MIR	5.92E-08	2.33E-10	1.63E-12	1.20E-06	2.83E-02	9.08E-02	6.49E-01	1
OG0000677	PMT	PMT_4TMC	2.44E-08	6.52E-12	0	2.43E-09	1.74E-03	6.19E-02	6.69E-01	1
OG0000680	cobW	CobW_C	5.35E-06	1.74E-06	1.83E-08	5.75E-08	6.91E-08	9.35E-09	5.94E-07	1
OG0000681	DSPc	mRNA_cap_C	1.99E-05	3.95E-04	2.98E-06	1.34E-02	1.78E-01	7.20E-03	1.23E-02	1
OG0000681	DSPc	mRNA_cap_enzyme	1.99E-05	3.95E-04	2.98E-06	0.01337643	1.78E-01	7.20E-03	1.23E-02	1
OG0000681	mRNA_cap_enzyme	mRNA_cap_C	1.64E-05	3.24E-04	1.69E-08	5.59E-08	5.48E-06	8.92E-09	6.13E-06	1
OG0000685	dsrm	A_deamin	0.8722329889	0.0786164538	0.04090003	0.0075641337	7.52E-04	3.52E-05	6.08E-05	1
OG0000685	z-alpha	A_deamin	0.9086160053	4.43E-02	2.23E-02	4.11E-03	4.13E-04	2.15E-05	3.73E-05	0
OG0000685	z-alpha	dsrm	0.9086160053	4.43E-02	2.23E-02	4.11E-03	4.13E-04	2.15E-05	3.73E-05	0
OG0000691	Metallophos	5_nucleotid_C	4.51E-07	9.92E-08	5.16E-10	4.10E-08	8.42E-08	4.15E-06	5.90E-07	1
OG0000692	DEAD	Helicase_C	1.23E-09	4.76E-10	1.37E-15	9.30E-15	5.95E-13	1.22E-10	4.51E-07	1
OG0000692	zf-CCHC	DEAD	0.9204549568	0.0449289637	0.0226133215	0.0041741902	4.19E-04	2.18E-05	3.77E-05	0
OG0000692	zf-CCHC	Helicase_C	0.920475984	0.044893027	0.0225940383	0.0041706221	4.19E-04	2.17E-05	3.77E-05	0
OG0000693	Sod_Fe_N	Sod_Fe_C	4.59E-07	1.58E-07	8.94E-10	1.33E-09	7.10E-10	3.76E-10	1.10E-07	1
OG0000694	CLU	eIF3_p135	0.0045751042	2.09E-06	6.83E-06	6.80E-08	8.21E-08	1.05E-08	6.37E-06	1
OG0000694	CLU_N	CLU	0.0045823575	2.10E-06	6.94E-06	1.30E-06	8.24E-08	1.05E-08	6.44E-06	1
OG0000694	CLU_N	eIF3_p135	4.58E-03	2.10E-06	6.94E-06	1.30E-06	8.23E-08	1.05E-08	6.20E-06	1
OG0000694	CLU_N	TPR_12	0.0333895645	1.41E-03	5.22E-04	1.38E-06	7.01E-06	1.06E-08	6.40E-06	1
OG0000694	CLU	TPR_12	0.033467293	1.42E-03	5.24E-04	1.39E-06	7.01E-06	1.07E-08	6.53E-06	1
OG0000694	eIF3_p135	TPR_12	0.0329314352	1.42E-03	5.24E-04	1.39E-06	7.01E-06	1.06E-08	6.40E-06	1
OG0000695	Peptidase_M17_N	Peptidase_M17	1.04E-02	3.39E-04	1.81E-08	6.34E-08	1.21E-05	2.69E-07	7.33E-04	1
OG0000696	DNA_photolyase	FAD_binding_7	8.09E-08	1.08E-07	1.86E-09	1.21E-07	2.04E-07	4.68E-06	5.97E-07	1
OG0000697	PX	Vps5	2.40E-07	1.51E-08	2.35E-10	4.21E-10	1.41E-10	2.06E-09	3.06E-06	1
OG0000701	PBD	Pkinase	3.89E-06	2.65E-09	1.26E-12	2.02E-12	6.48E-10	6.55E-08	6.92E-03	1
OG0000702	Biotin_carb_C	Biotin_lipoyl	4.38E-09	3.43E-10	6.21E-14	2.89E-13	2.16E-12	1.28E-10	7.32E-07	1
OG0000702	CPSase_L_chain	Biotin_carb_C	7.10E-09	3.88E-10	6.28E-14	2.51E-13	1.81E-12	1.05E-10	4.39E-07	1
OG0000702	CPSase_L_chain	Biotin_lipoyl	9.46E-09	4.73E-10	6.45E-14	3.06E-13	2.29E-12	1.33E-10	7.39E-07	1
OG0000702	CPSase_L_chain	CPSase_L_D2	3.34E-09	2.59E-10	4.15E-14	2.07E-13	1.52E-12	9.32E-11	4.27E-07	1
OG0000702	CPSase_L_D2	Biotin_carb_C	3.91E-09	2.89E-10	4.53E-14	2.22E-13	1.62E-12	9.75E-11	4.31E-07	1
OG0000702	CPSase_L_D2	Biotin_lipoyl	5.54E-09	3.74E-10	5.68E-14	2.91E-13	2.19E-12	1.29E-10	7.34E-07	1
OG0000703	FG-GAP	Integrin_alpha2	7.90E-01	1.27E-01	6.88E-02	1.28E-02	1.26E-03	5.59E-05	9.63E-05	1
OG0000703	VCBS	Integrin_alpha2	9.24E-01	4.73E-02	2.39E-02	4.41E-03	4.42E-04	2.27E-05	3.93E-05	0
OG0000704	Beta-Casp	CPSF73-100_C	7.15E-06	2.02E-06	2.16E-08	1.30E-06	8.19E-08	1.04E-08	6.16E-06	1
OG0000704	Beta-Casp	RMMBL	7.03E-09	5.26E-10	3.00E-14	1.72E-12	1.32E-11	2.58E-10	4.59E-07	1
OG0000704	Lactamase_B_6	Beta-Casp	7.96E-09	5.92E-10	8.34E-14	1.30E-11	2.81E-11	3.24E-10	8.52E-07	1
OG0000704	Lactamase_B_6	CPSF73-100_C	7.21E-06	2.02E-06	2.16E-08	1.32E-06	1.70E-07	3.10E-07	7.86E-04	1
OG0000704	Lactamase_B_6	RMMBL	1.15E-08	6.90E-10	9.16E-14	1.36E-11	2.95E-11	3.41E-10	9.74E-07	1
OG0000704	RMMBL	CPSF73-100_C	7.15E-06	2.02E-06	2.16E-08	1.30E-06	8.19E-08	1.04E-08	6.16E-06	1
OG0000705	2-Hacid_dh	2-Hacid_dh_C	7.62E-09	2.49E-09	1.45E-10	4.94E-09	1.22E-07	1.15E-09	3.49E-06	1
OG0000706	AZUL	HECT	0.003360585	5.34E-07	1.68E-08	3.19E-05	3.07E-03	1.43E-04	4.67E-01	1
OG0000706	RCC1	HECT	4.93E-04	4.98E-04	5.43E-05	1.54E-01	1.50E-02	6.05E-04	1.02E-03	1
OG0000707	zf-C6H2	Peptidase_M24	6.20E-06	1.90E-06	2.01E-08	7.09E-08	1.27E-05	2.66E-07	6.90E-04	1
OG0000709	Adaptin_N	Alpha_adaptinC2	7.16E-06	2.11E-06	8.83E-06	0.0376588206	6.10E-02	2.47E-03	8.31E-02	1
OG0000709	Adaptin_N	B2-adapt-app_C	1.01E-06	2.53E-08	1.51E-10	8.89E-10	1.41E-10	3.64E-10	7.73E-07	1
OG0000709	Alpha_adaptinC2	B2-adapt-app_C	7.23E-06	2.99E-06	9.21E-05	0.393474411	3.86E-02	1.56E-03	5.25E-02	1
OG0000710	Lactamase_B_2	DRMBL	0.0034914642	1.95E-06	2.19E-08	3.98E-06	2.56E-04	8.80E-04	1.51E-03	1
OG0000711	RRM_1	RRM_5	0.3339816921	0.0161472431	0.0080086644	0.0308205918	2.96E-03	1.21E-04	1.95E-04	1
OG0000711	RRM_5	RRM_1	0.0045900082	2.26E-06	2.25E-05	9.96E-06	1.36E-05	2.77E-07	7.78E-05	1
OG0000711	RRM_5	RRM_6	2.07E-04	3.90E-04	3.66E-07	0.0014031723	1.87E-05	4.82E-07	6.82E-06	1
OG0000711	RRM_6	RRM_5	3.37E-05	8.64E-07	2.04E-08	8.07E-06	2.56E-06	8.59E-06	2.52E-02	1
OG0000715	V-SNARE	V-SNARE_C	1.20E-08	7.36E-10	1.53E-12	5.17E-10	8.52E-10	1.89E-08	3.72E-06	1
OG0000719	Band_3_cyto	HCO3_cotransp	0.0028871577	4.53E-06	2.55E-04	0.8996459942	8.87E-02	3.60E-03	6.18E-03	1
OG0000719	PTS_EIIA_2	HCO3_cotransp	0.6773707789	3.31E-02	1.66E-02	2.37E-01	2.33E-02	9.46E-04	1.62E-03	1
OG0000721	Skp1_POZ	Skp1	2.74E-05	3.44E-07	2.36E-09	5.32E-09	6.21E-09	6.89E-10	1.50E-06	1
OG0000726	Sec23_BS	Gelsolin	1.52E-07	3.91E-09	6.96E-12	8.11E-09	2.73E-07	9.29E-09	4.71E-06	1
OG0000726	Sec23_BS	Sec23_helical	4.10E-09	3.86E-10	3.47E-14	5.17E-12	1.90E-10	6.84E-10	1.46E-06	1
OG0000726	Sec23_helical	Gelsolin	1.52E-07	3.91E-09	7.00E-12	9.66E-09	1.12E-06	2.72E-07	5.82E-04	1
OG0000726	Sec23_trunk	Gelsolin	1.52E-07	3.91E-09	6.96E-12	8.11E-09	2.73E-07	9.29E-09	4.71E-06	1
OG0000726	Sec23_trunk	Sec23_BS	4.04E-09	3.78E-10	3.22E-14	4.54E-12	1.67E-10	5.64E-10	6.41E-07	1
OG0000726	Sec23_trunk	Sec23_helical	3.50E-09	3.53E-10	3.24E-14	4.90E-12	1.81E-10	6.56E-10	1.37E-06	1
OG0000726	zf-Sec23_Sec24	Gelsolin	1.76E-07	4.37E-09	7.60E-12	8.14E-09	2.74E-07	9.30E-09	4.71E-06	1
OG0000726	zf-Sec23_Sec24	Sec23_BS	4.79E-08	1.58E-09	3.84E-13	5.68E-11	3.43E-10	7.01E-10	6.86E-07	1
OG0000726	zf-Sec23_Sec24	Sec23_helical	3.91E-08	1.42E-09	3.89E-13	6.22E-11	3.77E-10	8.21E-10	1.46E-06	1
OG0000726	zf-Sec23_Sec24	Sec23_trunk	6.40E-09	5.16E-10	2.04E-13	5.23E-11	3.19E-10	6.60E-10	6.27E-07	1
OG0000730	ArgoL1	ArgoL2	9.61E-03	3.54E-04	1.12E-07	3.55E-05	0.009687942	4.11E-04	7.28E-04	1
OG0000730	ArgoL1	ArgoMid	0.011273811	4.46E-04	4.00E-05	6.21E-05	0.0117475321	4.87E-04	8.40E-04	1
OG0000730	ArgoL1	PAZ	0.0086736106	3.36E-04	6.19E-08	2.81E-05	0.0073706415	3.19E-04	5.75E-04	1
OG0000730	ArgoL1	Piwi	0.0076298002	3.26E-04	6.02E-08	2.69E-05	0.0070820863	3.10E-04	5.64E-04	1
OG0000730	ArgoL2	ArgoMid	1.01E-02	4.40E-04	3.96E-05	6.15E-05	1.16E-02	4.84E-04	8.39E-04	1
OG0000730	ArgoL2	Piwi	8.51E-03	3.46E-04	1.10E-07	3.49E-05	9.52E-03	4.07E-04	7.27E-04	1
OG0000730	ArgoMid	Piwi	8.90E-03	3.64E-04	1.59E-06	6.13E-05	1.16E-02	4.83E-04	8.39E-04	1
OG0000730	ArgoN	ArgoL1	8.11E-03	3.33E-04	6.37E-08	3.19E-05	0.0080653959	3.50E-04	6.34E-04	1
OG0000730	ArgoN	ArgoL2	1.05E-02	3.62E-04	1.18E-07	4.06E-05	1.03E-02	4.31E-04	7.56E-04	1
OG0000730	ArgoN	ArgoMid	0.0121932337	4.51E-04	4.07E-05	6.40E-05	0.0121115103	5.00E-04	8.62E-04	1
OG0000730	ArgoN	PAZ	7.88E-03	3.32E-04	6.22E-08	2.88E-05	6.99E-03	3.03E-04	5.45E-04	1
OG0000730	ArgoN	Piwi	7.78E-03	3.28E-04	5.81E-08	2.31E-05	0.0060565486	2.64E-04	4.78E-04	1
OG0000730	PAZ	ArgoL2	0.0099168642	3.57E-04	1.14E-07	3.73E-05	0.0097931853	4.14E-04	7.29E-04	1
OG0000730	PAZ	ArgoMid	1.16E-02	4.47E-04	4.01E-05	6.22E-05	1.18E-02	4.87E-04	8.40E-04	1
OG0000730	PAZ	Piwi	0.0067384172	3.04E-04	2.29E-08	2.06E-05	5.40E-03	2.43E-04	4.55E-04	1
OG0000733	TGS	HGTP_anticodon	6.74E-05	1.74E-06	1.79E-08	5.63E-08	6.82E-08	8.91E-09	6.09E-06	1
OG0000733	TGS	tRNA_SAD	5.71E-05	1.55E-06	1.60E-08	5.04E-08	6.11E-08	7.87E-09	5.88E-06	1
OG0000733	TGS	tRNA-synt_2b	5.89E-05	1.51E-06	1.51E-08	4.71E-08	5.66E-08	7.01E-09	5.63E-06	1
OG0000733	tRNA_SAD	HGTP_anticodon	1.77E-06	7.81E-08	1.01E-09	2.71E-09	1.73E-09	2.12E-09	1.16E-06	1
OG0000733	tRNA_SAD	tRNA-synt_2b	1.08E-06	3.00E-08	1.52E-10	1.38E-10	1.29E-10	1.07E-09	8.69E-07	1
OG0000733	tRNA-synt_2b	HGTP_anticodon	8.67E-08	2.51E-09	5.27E-13	1.54E-11	4.15E-11	5.98E-10	4.46E-07	1
OG0000736	TPR_11	DnaJ	1.17E-08	8.01E-10	2.55E-12	4.85E-11	1.15E-10	1.75E-09	2.50E-06	1
OG0000736	TPR_11	TPR_1	1.41E-05	2.61E-04	1.22E-08	3.88E-08	9.26E-08	1.85E-07	6.18E-04	1
OG0000736	TPR_11	TPR_2	6.54E-06	2.02E-06	8.80E-07	1.01E-07	5.59E-05	1.99E-06	5.02E-06	1
OG0000736	TPR_11	TPR_8	0.0123132654	3.85E-04	2.34E-08	1.06E-07	6.58E-05	2.24E-04	1.30E-02	1
OG0000736	TPR_11	TPR_9	0.0042904846	2.06E-06	1.42E-05	1.80E-04	7.00E-03	2.38E-02	4.10E-02	1
OG0000736	TPR_1	DnaJ	9.80E-06	1.87E-04	8.17E-09	2.57E-08	5.69E-08	1.09E-07	4.84E-04	1
OG0000736	TPR_2	DnaJ	6.52E-06	2.00E-06	2.30E-08	1.01E-07	5.65E-05	2.02E-06	5.37E-06	1
OG0000736	TPR_2	TPR_1	1.99E-05	3.92E-04	8.77E-07	4.53E-06	2.08E-03	8.40E-05	1.08E-03	1
OG0000736	TPR_2	TPR_11	1.81E-05	3.88E-04	8.45E-07	9.81E-07	0.0015763455	6.35E-05	8.09E-04	1
OG0000736	TPR_8	DnaJ	4.17E-04	3.88E-04	2.36E-08	1.55E-07	1.50E-04	5.10E-04	0.0297153681	1
OG0000736	TPR_8	TPR_1	0.0149482633	5.10E-04	6.28E-05	1.45E-04	2.49E-01	1.01E-02	5.84E-01	1
OG0000736	TPR_8	TPR_11	4.23E-04	4.37E-04	3.03E-05	3.30E-03	2.06E-01	8.33E-03	4.83E-01	1
OG0000736	TPR_9	DnaJ	0.0045875156	2.08E-06	5.25E-06	5.59E-06	1.02E-04	3.48E-04	4.55E-03	1
OG0000737	PA	Peptidase_M28	0.0021622357	7.28E-07	2.48E-08	1.22E-05	4.12E-06	1.45E-05	8.93E-04	1
OG0000737	PA	TFR_dimer	0.0022134634	7.34E-07	2.49E-08	1.22E-05	4.20E-06	1.48E-05	9.09E-04	1
OG0000737	Peptidase_M28	TFR_dimer	1.09E-03	5.80E-07	2.11E-08	1.09E-05	3.82E-06	1.39E-05	8.94E-04	1
OG0000740	Clathrin	Vps39_2	3.43E-05	8.96E-07	3.21E-08	2.58E-06	8.80E-08	4.67E-08	6.94E-06	1
OG0000740	CNH	Clathrin	3.54E-05	9.54E-07	6.56E-06	2.63E-06	8.95E-08	4.73E-08	6.97E-06	1
OG0000740	CNH	Vps39_1	1.65E-06	6.25E-07	7.12E-09	3.46E-07	3.48E-08	3.32E-08	2.71E-06	1
OG0000740	CNH	Vps39_2	1.46E-07	1.26E-08	2.61E-10	1.40E-08	6.36E-10	1.09E-09	1.74E-06	1
OG0000740	Vps39_1	Clathrin	3.91E-05	2.09E-06	7.02E-06	2.75E-06	1.06E-07	9.19E-08	1.41E-05	1
OG0000740	Vps39_1	Vps39_2	1.14E-06	4.07E-07	4.39E-09	1.42E-08	2.22E-08	3.00E-08	4.73E-06	1
OG0000741	Enolase_N	Enolase_C	5.21E-06	7.89E-08	1.10E-10	3.06E-10	2.31E-10	8.80E-10	1.34E-06	1
OG0000742	TGFb_propeptide	TGF_beta	0.8004296754	1.21E-01	6.54E-02	1.21E-02	1.20E-03	5.34E-05	9.20E-05	1
OG0000744	Ion_trans_2	BK_channel_a	5.57E-06	1.38E-06	2.73E-08	6.16E-07	1.23E-08	4.00E-09	9.09E-07	1
OG0000744	Ion_trans	BK_channel_a	2.12E-01	1.02E-02	4.98E-03	8.52E-04	3.91E-08	9.91E-08	1.99E-05	1
OG0000746	IP_trans	DDHD	2.03E-02	7.70E-04	1.96E-04	8.92E-01	8.75E-02	3.54E-03	6.07E-03	1
OG0000747	HGTP_anticodon	ProRS-C_1	7.51E-05	2.00E-06	2.10E-08	6.66E-08	8.01E-08	9.12E-09	3.17E-06	1
OG0000747	tRNA-synt_1c_C	HGTP_anticodon	3.43E-04	7.88E-04	2.00E-04	9.00E-01	8.83E-02	3.57E-03	6.12E-03	1
OG0000747	tRNA-synt_1c_C	ProRS-C_1	3.44E-04	7.89E-04	2.00E-04	9.00E-01	8.83E-02	3.57E-03	6.12E-03	1
OG0000747	tRNA-synt_1c_C	tRNA-synt_2b	3.25E-05	7.88E-04	2.00E-04	9.00E-01	8.83E-02	3.57E-03	6.12E-03	1
OG0000747	tRNA-synt_1c_C	WHEP-TRS	7.23E-06	2.83E-06	7.61E-05	3.42E-01	5.83E-01	2.36E-02	4.05E-02	1
OG0000747	tRNA-synt_1c	HGTP_anticodon	3.40E-04	7.88E-04	2.00E-04	9.00E-01	8.83E-02	3.57E-03	6.12E-03	1
OG0000747	tRNA-synt_1c	ProRS-C_1	3.44E-04	7.89E-04	2.00E-04	9.00E-01	8.83E-02	3.57E-03	6.12E-03	1
OG0000747	tRNA-synt_1c	tRNA-synt_1c_C	7.16E-06	2.01E-06	2.13E-08	6.74E-08	8.14E-08	1.03E-08	6.02E-06	1
OG0000747	tRNA-synt_1c	tRNA-synt_2b	3.22E-05	7.87E-04	2.00E-04	9.00E-01	8.83E-02	3.57E-03	6.12E-03	1
OG0000747	tRNA-synt_1c	WHEP-TRS	7.23E-06	2.83E-06	7.61E-05	3.42E-01	5.83E-01	2.36E-02	4.05E-02	1
OG0000747	tRNA-synt_2b	HGTP_anticodon	7.33E-05	1.98E-06	2.09E-08	6.63E-08	7.98E-08	9.21E-09	3.47E-06	1
OG0000747	tRNA-synt_2b	ProRS-C_1	7.51E-05	2.00E-06	2.10E-08	6.66E-08	8.02E-08	9.43E-09	3.95E-06	1
OG0000747	WHEP-TRS	HGTP_anticodon	3.40E-04	7.80E-04	1.96E-04	0.8863987345	0.0869670818	0.0035189709	0.0060324017	1
OG0000747	WHEP-TRS	ProRS-C_1	3.43E-04	7.86E-04	1.99E-04	9.00E-01	8.83E-02	3.57E-03	6.12E-03	1
OG0000747	WHEP-TRS	tRNA-synt_2b	3.22E-05	7.80E-04	1.96E-04	8.87E-01	8.70E-02	3.52E-03	6.03E-03	1
OG0000748	MutS_III	MutS_IV	3.21E-07	6.51E-09	1.79E-12	3.19E-10	1.02E-10	1.59E-08	3.70E-04	1
OG0000748	MutS_III	MutS_V	8.14E-08	2.26E-09	1.44E-13	7.16E-13	1.00E-11	2.25E-10	1.91E-06	1
OG0000748	MutS_II	MutS_III	1.04E-07	3.34E-09	7.24E-12	3.28E-10	3.83E-11	3.01E-10	2.51E-06	1
OG0000748	MutS_II	MutS_IV	5.87E-07	1.31E-08	4.02E-11	1.28E-09	2.14E-10	1.88E-08	4.17E-04	1
OG0000748	MutS_II	MutS_V	1.61E-07	5.00E-09	1.12E-11	4.10E-10	4.28E-11	3.05E-10	2.52E-06	1
OG0000748	MutS_I	MutS_II	2.02E-07	6.29E-09	1.73E-11	5.35E-10	4.92E-11	3.04E-10	2.52E-06	1
OG0000748	MutS_I	MutS_III	1.77E-07	4.53E-09	3.62E-13	7.94E-13	1.01E-11	2.17E-10	1.49E-06	1
OG0000748	MutS_I	MutS_IV	9.90E-07	1.84E-08	7.64E-12	4.68E-10	1.19E-10	1.64E-08	3.72E-04	1
OG0000748	MutS_I	MutS_V	1.79E-07	4.60E-09	4.22E-13	8.48E-13	1.07E-11	2.35E-10	1.93E-06	1
OG0000748	MutS_IV	MutS_V	3.91E-07	7.73E-09	1.86E-12	3.20E-10	1.02E-10	1.59E-08	3.70E-04	1
OG0000751	Exo_endo_phos	zf-GRF	0.0045646898	2.03E-06	3.54E-08	2.91E-06	1.46E-04	4.96E-04	8.33E-04	1
OG0000756	DEAD	Helicase_C	3.58E-08	1.26E-09	9.63E-14	1.51E-12	2.39E-11	5.70E-10	5.91E-07	1
OG0000761	Filamin	Glyco_transf_90	0.9270411556	4.55E-02	2.29E-02	4.23E-03	4.24E-04	2.20E-05	3.81E-05	0
OG0000765	NTP_transf_2	PAP_assoc	1.24E-04	2.07E-04	6.36E-09	1.29E-08	1.57E-08	2.09E-09	3.30E-06	1
OG0000768	RRM_1	RRM_6	6.64E-02	3.04E-03	0.0013493109	0.0051105354	3.90E-04	1.58E-05	7.03E-06	1
OG0000768	RRM_6	RRM_1	0.0209411296	8.51E-04	2.37E-04	0.0053937339	4.12E-04	1.64E-05	7.32E-06	1
OG0000769	DPPIV_N	Peptidase_S9	1.04E-07	1.43E-08	3.07E-10	1.25E-09	8.97E-10	1.68E-09	4.17E-06	1
OG0000773	Disintegrin	ADAM_CR	0.8232929182	1.08E-01	5.74E-02	1.07E-02	1.05E-03	4.74E-05	8.18E-05	1
OG0000773	Pep_M12B_propep	ADAM_CR	0.8788125895	0.0745854674	0.0386635291	0.0071480784	7.11E-04	3.35E-05	5.80E-05	1
OG0000773	Pep_M12B_propep	Disintegrin	0.8803436419	0.0655813438	0.0337913054	0.0062452467	6.22E-04	3.00E-05	5.18E-05	1
OG0000773	Pep_M12B_propep	Reprolysin	0.861709305	0.0845157087	0.0441793943	0.0081743001	8.11E-04	3.76E-05	6.49E-05	1
OG0000773	Reprolysin	ADAM_CR	8.13E-01	1.14E-01	6.11E-02	1.13E-02	1.12E-03	5.02E-05	8.65E-05	1
OG0000773	Reprolysin	Disintegrin	0.8289973594	0.1036399741	0.0550955433	1.02E-02	1.01E-03	4.57E-05	7.88E-05	1
OG0000776	CSTF2_hinge	CSTF_C	0.0045743844	2.02E-06	2.36E-08	9.54E-06	7.73E-04	2.64E-03	4.54E-03	1
OG0000776	RRM_1	CSTF2_hinge	7.52E-05	1.97E-06	2.06E-08	6.92E-08	7.32E-06	2.50E-05	8.41E-04	1
OG0000776	RRM_1	CSTF_C	0.0045754382	2.02E-06	6.45E-08	1.94E-04	0.0179695491	6.14E-02	1.06E-01	1
OG0000777	MIB_HERC2	HECT	0.0197499968	0.6104586224	0.3062446884	0.0560919486	0.0055095978	2.27E-04	3.90E-04	1
OG0000777	Sad1_UNC	HECT	1.97E-02	6.10E-01	3.06E-01	5.61E-02	5.51E-03	2.27E-04	3.90E-04	1
OG0000777	Sad1_UNC	MIB_HERC2	0.0197499968	0.6104586224	0.3062446884	5.61E-02	5.51E-03	2.27E-04	3.90E-04	1
OG0000777	WWE	HECT	0.1719361602	0.5044231036	0.2529854357	4.63E-02	4.55E-03	1.89E-04	3.24E-04	1
OG0000781	SNF2_N	Helicase_C	2.01E-08	2.52E-09	6.12E-11	2.32E-10	4.23E-10	3.68E-10	1.43E-06	1
OG0000782	zf-C3HC4	RAWUL	2.15E-05	1.09E-03	1.15E-01	2.16E-02	2.02E-03	8.19E-05	4.73E-03	1
OG0000784	E1_4HB	E1_UFD	6.69E-06	1.92E-04	1.02E-08	2.94E-08	1.63E-08	3.53E-09	2.15E-06	1
OG0000784	E1_4HB	ThiF	1.02E-06	3.80E-05	1.91E-09	4.48E-09	1.26E-09	4.53E-10	6.86E-07	1
OG0000784	E1_4HB	UBA_e1_thiolCys	1.15E-06	4.06E-05	2.02E-09	4.74E-09	1.34E-09	4.76E-10	7.29E-07	1
OG0000784	E1_FCCH	E1_4HB	3.60E-06	1.17E-04	5.80E-09	1.53E-08	7.62E-09	1.46E-09	1.51E-06	1
OG0000784	E1_FCCH	E1_UFD	9.55E-06	2.81E-04	1.58E-08	4.97E-08	5.85E-08	5.76E-09	1.96E-06	1
OG0000784	E1_FCCH	ThiF	3.73E-06	1.17E-04	5.69E-09	1.47E-08	7.20E-09	1.33E-09	1.02E-06	1
OG0000784	E1_FCCH	UBA_e1_thiolCys	4.12E-06	1.23E-04	5.97E-09	1.55E-08	7.59E-09	1.40E-09	1.09E-06	1
OG0000784	ThiF	E1_4HB	1.69E-06	5.95E-05	3.22E-09	8.44E-09	4.12E-09	8.20E-10	7.60E-07	1
OG0000784	ThiF	E1_FCCH	3.29E-06	1.15E-04	5.69E-09	1.48E-08	7.22E-09	1.33E-09	1.02E-06	1
OG0000784	ThiF	E1_UFD	4.53E-06	1.57E-04	8.36E-09	2.40E-08	1.31E-08	2.75E-09	1.16E-06	1
OG0000784	ThiF	UBA_e1_thiolCys	7.10E-07	3.08E-05	1.55E-09	3.48E-09	9.15E-10	3.29E-10	3.04E-07	1
OG0000784	UBA_e1_thiolCys	E1_UFD	4.53E-06	1.57E-04	8.36E-09	2.40E-08	1.31E-08	2.75E-09	1.16E-06	1
OG0000789	Biotin_lipoyl	2-oxoacid_dh	6.27E-07	7.74E-08	1.16E-10	1.99E-09	4.79E-09	2.11E-09	7.73E-07	1
OG0000789	Biotin_lipoyl	E3_binding	6.92E-07	7.65E-08	1.60E-11	2.36E-10	1.09E-09	2.09E-09	1.72E-06	1
OG0000789	E3_binding	2-oxoacid_dh	2.32E-07	3.44E-08	3.30E-11	9.81E-10	2.47E-09	1.13E-09	1.39E-06	1
OG0000792	ATP-gua_PtransN	ATP-gua_Ptrans	1.54E-06	8.53E-03	1.35E-02	2.82E-03	1.67E-04	5.82E-04	9.94E-04	1
OG0000793	LIM	Homeobox	1.26E-02	1.54E-03	6.39E-04	8.91E-01	8.75E-02	3.55E-03	6.08E-03	1
OG0000794	Orn_Arg_deC_N	Orn_DAP_Arg_deC	1.28E-07	4.35E-07	9.39E-09	3.53E-08	5.28E-08	4.25E-08	1.71E-06	1
OG0000797	TPR_11	WD40	7.80E-01	3.80E-02	1.91E-02	7.37E-02	7.23E-03	2.97E-04	5.10E-04	1
OG0000797	WD40	TPR_11	7.98E-01	3.89E-02	1.96E-02	7.54E-02	7.40E-03	3.04E-04	5.20E-04	1
OG0000800	DEP	DUF547	2.26E-01	1.09E-02	5.32E-03	9.08E-04	7.31E-07	6.15E-06	6.96E-04	1
OG0000800	Glutaredoxin	DEP	9.25E-01	4.52E-02	2.27E-02	4.20E-03	4.21E-04	2.18E-05	1.28E-03	0
OG0000800	Glutaredoxin	DUF547	5.50E-01	2.68E-02	1.34E-02	2.43E-03	1.94E-04	9.90E-06	5.69E-04	1
OG0000801	ARID	RFX_DNA_binding	8.84E-01	4.31E-02	2.17E-02	4.00E-03	4.02E-04	2.11E-05	3.66E-05	1
OG0000802	DEAD_2	Helicase_C_2	1.28E-08	7.93E-10	4.70E-11	9.39E-10	2.59E-09	2.21E-09	1.82E-06	1
OG0000803	UDP-g_GGTase	Glyco_transf_8	1.26E-02	3.94E-04	4.27E-06	1.39E-06	7.02E-06	1.15E-08	8.71E-06	1
OG0000805	PHD	JmjC	0.0189015102	0.0271973962	0.0134761089	3.10E-01	5.01E-01	2.02E-02	3.47E-02	1
OG0000806	zf-A20	VPS9	4.63E-03	4.11E-06	2.00E-04	9.00E-01	8.83E-02	3.57E-03	6.13E-03	0
OG0000807	AhpC-TSA	1-cysPrx_C	4.02E-09	1.63E-09	1.03E-08	2.16E-10	9.15E-11	5.55E-10	1.22E-06	1
OG0000810	hEGF	Laminin_EGF	8.93E-01	5.18E-02	2.63E-02	4.87E-03	4.87E-04	2.45E-05	4.24E-05	1
OG0000813	EFG_II	EFG_C	6.65E-09	5.69E-10	1.45E-13	2.88E-12	4.57E-11	4.52E-09	6.10E-07	1
OG0000813	EFG_II	EFG_IV	5.36E-07	2.08E-07	2.19E-09	7.09E-09	1.02E-08	9.47E-09	8.46E-07	1
OG0000813	EFG_IV	EFG_C	4.57E-07	1.89E-07	2.03E-09	6.62E-09	9.53E-09	9.24E-09	8.42E-07	1
OG0000813	GTP_EFTU_D2	EFG_C	5.59E-07	1.33E-08	3.99E-11	5.51E-11	9.97E-11	6.52E-09	1.88E-06	1
OG0000813	GTP_EFTU_D2	EFG_II	5.59E-07	1.33E-08	3.99E-11	5.51E-11	9.97E-11	6.52E-09	1.88E-06	1
OG0000813	GTP_EFTU_D2	EFG_IV	5.07E-06	1.47E-06	1.48E-08	4.51E-08	6.13E-08	3.05E-08	2.71E-06	1
OG0000813	GTP_EFTU	EFG_C	1.58E-08	8.10E-10	1.72E-13	2.98E-12	4.70E-11	4.62E-09	6.30E-07	1
OG0000813	GTP_EFTU	EFG_II	1.56E-08	7.92E-10	1.63E-13	2.63E-12	4.54E-11	4.54E-09	6.25E-07	1
OG0000813	GTP_EFTU	EFG_IV	1.58E-06	4.44E-07	4.26E-09	1.33E-08	1.84E-08	1.25E-08	9.24E-07	1
OG0000813	GTP_EFTU	GTP_EFTU_D2	5.59E-07	1.33E-08	3.99E-11	5.52E-11	1.00E-10	6.55E-09	1.92E-06	1
OG0000815	MutS_III	MutS_IV	6.31E-06	1.59E-06	1.51E-08	4.37E-08	2.58E-08	6.08E-09	1.59E-06	1
OG0000815	MutS_III	MutS_V	4.25E-07	3.05E-09	4.80E-13	1.04E-12	1.29E-11	2.77E-10	6.49E-07	1
OG0000815	MutS_II	MutS_III	9.90E-07	7.15E-09	3.91E-12	3.20E-11	6.85E-11	1.27E-09	6.91E-06	1
OG0000815	MutS_II	MutS_IV	6.45E-06	1.66E-06	1.61E-08	4.78E-08	3.63E-08	6.60E-08	1.08E-05	1
OG0000815	MutS_II	MutS_V	1.67E-06	1.15E-08	6.12E-12	3.75E-11	7.18E-11	9.15E-10	1.34E-06	1
OG0000815	MutS_I	MutS_II	1.40E-06	1.00E-08	8.10E-12	6.93E-11	1.47E-10	2.45E-09	4.93E-06	1
OG0000815	MutS_I	MutS_III	6.15E-07	4.49E-09	8.69E-13	3.68E-12	4.78E-11	1.46E-09	5.25E-06	1
OG0000815	MutS_I	MutS_IV	6.53E-06	1.66E-06	1.61E-08	4.75E-08	2.85E-08	8.62E-09	7.72E-06	1
OG0000815	MutS_I	MutS_V	1.32E-07	1.43E-09	3.30E-13	3.07E-12	4.57E-11	1.33E-09	4.07E-06	1
OG0000815	MutS_IV	MutS_V	5.83E-06	1.49E-06	1.42E-08	4.11E-08	2.43E-08	5.77E-09	1.46E-06	1
OG0000816	ILEI	GNT-I	4.64E-06	3.31E-06	5.19E-04	8.99E-01	8.91E-02	3.63E-03	6.27E-03	1
OG0000819	AAA_22	Cdc6_C	0.0045885816	2.06E-06	2.37E-06	6.64E-03	5.99E-01	2.42E-02	4.16E-02	1
OG0000819	AAA	Cdc6_C	6.03E-06	1.99E-06	2.18E-06	0.0027472545	0.248402737	1.01E-02	5.84E-01	1
OG0000819	BAH	AAA	1.89E-04	0.0056362938	0.0026331104	3.86E-04	1.64E-02	6.64E-04	1.12E-03	1
OG0000819	BAH	Cdc6_C	1.75E-02	5.40E-01	2.71E-01	4.96E-02	8.45E-02	3.42E-03	5.86E-03	1
OG0000822	CarboxypepD_reg	Peptidase_M14	9.85E-06	8.21E-05	0.0076850485	8.93E-01	8.76E-02	3.55E-03	6.08E-03	1
OG0000822	Peptidase_M14	CarboxypepD_reg	1.94E-06	1.57E-06	5.38E-06	2.46E-02	2.36E-03	8.22E-03	1.46E-02	1
OG0000824	C2	CUE	8.54E-04	0.0010227621	3.18E-04	0.8991291738	8.82E-02	3.57E-03	6.12E-03	1
OG0000825	2-oxogl_dehyd_N	E1_dh	5.59E-06	1.69E-06	1.77E-08	5.56E-08	6.77E-08	8.98E-09	5.69E-06	1
OG0000825	2-oxogl_dehyd_N	OxoGdeHyase_C	6.43E-06	1.81E-06	1.88E-08	5.89E-08	7.16E-08	9.40E-09	5.92E-06	1
OG0000825	2-oxogl_dehyd_N	Transket_pyr	5.59E-06	1.69E-06	1.77E-08	5.56E-08	6.77E-08	8.98E-09	5.69E-06	1
OG0000825	E1_dh	OxoGdeHyase_C	1.51E-08	2.41E-10	2.36E-13	6.40E-13	8.21E-12	2.17E-10	1.02E-06	1
OG0000825	E1_dh	Transket_pyr	1.06E-08	1.82E-10	1.87E-13	5.26E-13	6.83E-12	1.89E-10	8.76E-07	1
OG0000825	Transket_pyr	OxoGdeHyase_C	1.16E-08	1.95E-10	2.00E-13	5.66E-13	7.35E-12	2.03E-10	1.01E-06	1
OG0000833	HIRA_B	Hira	0.0123831353	3.84E-04	3.47E-08	1.89E-06	5.33E-05	1.81E-04	2.68E-01	1
OG0000833	WD40	Hira	7.60E-05	2.02E-06	2.17E-08	1.28E-06	8.18E-08	1.05E-08	6.40E-06	1
OG0000833	WD40	HIRA_B	0.0123729148	3.84E-04	2.18E-08	1.89E-06	5.32E-05	1.81E-04	2.68E-01	1
OG0000835	DUF3591	Bromodomain	0.0045571074	2.02E-06	3.67E-08	6.92E-05	1.70E-07	3.10E-07	7.87E-04	1
OG0000835	DUF3591	zf-CCHC_6	2.66E-01	1.28E-02	6.32E-03	1.11E-03	1.01E-01	4.08E-03	0.2362817246	1
OG0000835	TBP-binding	Bromodomain	0.0138872996	4.57E-04	3.62E-05	0.1493391624	0.0145495692	0.0495778902	0.0852050797	1
OG0000835	TBP-binding	DUF3591	1.27E-02	3.98E-04	6.56E-06	2.70E-02	2.53E-03	8.63E-03	1.48E-02	1
OG0000836	Pirin	Pirin_C	2.83E-06	1.93E-07	3.07E-09	9.34E-08	8.50E-09	7.35E-10	6.70E-07	1
OG0000839	UBA_4	UBX	0.0041787014	9.27E-07	4.53E-08	1.18E-04	0.0098338763	4.04E-04	6.87E-04	1
OG0000849	Guanylate_cyc	AAA_16	1.12E-04	4.13E-04	1.30E-05	1.33E-03	1.53E-05	1.04E-04	3.56E-03	1
OG0000850	RRM_1	zf-CCHC	1.20E-02	3.98E-04	7.62E-06	8.53E-04	2.47E-03	9.96E-05	0.0012821995	1
OG0000853	NAD_Gly3P_dh_N	NAD_Gly3P_dh_C	5.14E-04	1.67E-08	5.20E-12	9.95E-11	6.05E-10	8.60E-09	1.01E-06	1
OG0000860	G6PD_C	Glucosamine_iso	9.27E-01	4.52E-02	0.0227714196	4.20E-03	4.22E-04	2.19E-05	3.79E-05	0
OG0000860	G6PD_N	G6PD_C	2.34E-07	1.85E-07	2.50E-09	8.67E-08	1.03E-08	1.92E-09	1.65E-06	1
OG0000860	G6PD_N	Glucosamine_iso	9.27E-01	0.0452433982	0.0227714196	0.0042031292	4.22E-04	2.19E-05	3.79E-05	0
OG0000862	DNA_pol_B_palm	DNA_pol_B_thumb	1.33E-08	1.92E-09	5.08E-11	2.14E-09	1.16E-10	1.69E-09	4.07E-06	1
OG0000862	DNA_pol_lambd_f	DNA_pol_B_palm	1.67E-07	4.77E-08	3.07E-10	9.27E-09	4.82E-10	1.57E-08	4.49E-06	1
OG0000862	DNA_pol_lambd_f	DNA_pol_B_thumb	4.32E-07	1.20E-07	9.76E-10	3.59E-08	1.39E-09	1.77E-08	4.73E-06	1
OG0000862	HHH_8	DNA_pol_B_palm	2.36E-07	7.38E-08	1.04E-09	1.76E-08	1.32E-09	5.94E-08	5.35E-04	1
OG0000862	HHH_8	DNA_pol_B_thumb	5.52E-07	1.56E-07	2.88E-09	3.87E-08	2.91E-09	7.19E-08	5.87E-04	1
OG0000862	HHH_8	DNA_pol_lambd_f	8.44E-08	1.18E-08	5.66E-10	2.00E-08	4.58E-09	4.81E-07	5.74E-04	1
OG0000864	GST_N_2	GST_C_2	8.75E-07	3.65E-07	4.07E-09	1.76E-07	1.46E-08	1.72E-09	1.82E-06	1
OG0000865	malic	Malic_M	5.55E-06	7.43E-05	2.48E-10	6.16E-10	4.41E-10	1.44E-09	3.98E-07	1
OG0000866	HELP	WD40	2.10E-06	3.91E-06	3.07E-04	0.0045705565	3.35E-04	1.33E-05	2.06E-06	1
OG0000866	WD40	HELP	8.31E-04	2.56E-02	0.0126369072	0.1789980632	1.75E-02	7.07E-04	1.19E-03	1
OG0000870	SAM_1	DDHD	9.26E-01	4.54E-02	0.0228523145	0.004218139	4.23E-04	2.19E-05	3.80E-05	0
OG0000870	WWE	DDHD	0.1737203238	0.5095654399	0.2555603462	0.0468118223	4.60E-03	1.91E-04	3.27E-04	1
OG0000870	WWE	SAM_1	0.8829016296	0.0430108768	0.0216496808	0.0039977486	4.02E-04	2.11E-05	3.65E-05	1
OG0000876	EFG_II	EFG_C	1.57E-06	6.51E-07	7.01E-09	1.86E-08	2.06E-08	1.57E-09	3.93E-07	1
OG0000876	EFG_II	EFG_IV	8.40E-07	3.69E-07	3.92E-09	1.16E-08	1.31E-08	1.12E-09	3.57E-07	1
OG0000876	EFG_IV	EFG_C	1.27E-06	5.24E-07	5.60E-09	1.44E-08	1.57E-08	1.19E-09	2.39E-07	1
OG0000876	GTP_EFTU_D2	EFG_C	6.33E-06	1.64E-06	1.70E-08	4.55E-08	5.15E-08	4.14E-09	7.56E-07	1
OG0000876	GTP_EFTU_D2	EFG_II	5.77E-06	1.47E-06	1.39E-08	4.01E-08	4.54E-08	3.67E-09	7.16E-07	1
OG0000876	GTP_EFTU_D2	EFG_IV	5.93E-06	1.54E-06	1.49E-08	4.38E-08	5.02E-08	4.28E-09	7.51E-07	1
OG0000876	GTP_EFTU	EFG_C	1.54E-06	6.34E-07	6.79E-09	1.78E-08	1.97E-08	1.57E-09	2.59E-07	1
OG0000876	GTP_EFTU	EFG_II	1.17E-06	5.05E-07	5.34E-09	1.60E-08	1.83E-08	1.63E-09	3.90E-07	1
OG0000876	GTP_EFTU	EFG_IV	1.05E-06	4.46E-07	4.61E-09	1.35E-08	1.52E-08	1.34E-09	2.43E-07	1
OG0000876	GTP_EFTU	GTP_EFTU_D2	3.89E-06	4.41E-07	8.90E-09	2.74E-08	3.22E-08	3.09E-09	6.45E-07	1
OG0000880	DUF3385	FAT	6.67E-06	1.72E-06	1.69E-08	4.96E-08	2.91E-08	7.18E-09	4.64E-06	1
OG0000880	DUF3385	FATC	6.67E-06	1.72E-06	1.69E-08	4.96E-08	2.91E-08	7.13E-09	4.52E-06	1
OG0000880	DUF3385	PI3_PI4_kinase	6.67E-06	1.72E-06	1.69E-08	4.96E-08	2.91E-08	7.13E-09	4.52E-06	1
OG0000880	DUF3385	Rapamycin_bind	6.67E-06	1.72E-06	1.69E-08	4.96E-08	2.91E-08	7.18E-09	4.64E-06	1
OG0000880	FAT	FATC	5.68E-06	1.22E-06	9.66E-09	2.51E-08	1.49E-08	4.27E-09	3.41E-06	1
OG0000880	FAT	PI3_PI4_kinase	5.64E-06	1.21E-06	9.60E-09	2.50E-08	1.48E-08	4.25E-09	3.40E-06	1
OG0000880	FAT	Rapamycin_bind	5.64E-06	1.21E-06	9.60E-09	2.50E-08	1.48E-08	4.25E-09	3.40E-06	1
OG0000880	PI3_PI4_kinase	FATC	3.65E-06	8.66E-07	6.93E-09	1.81E-08	1.08E-08	3.45E-09	3.13E-06	1
OG0000880	Rapamycin_bind	FATC	3.76E-06	8.91E-07	7.13E-09	1.86E-08	1.11E-08	3.53E-09	3.25E-06	1
OG0000880	Rapamycin_bind	PI3_PI4_kinase	3.65E-06	8.67E-07	6.95E-09	1.81E-08	1.08E-08	3.48E-09	3.24E-06	1
OG0000882	AAA	Lon_C	3.77E-07	1.61E-08	1.78E-10	6.34E-10	1.18E-09	1.10E-09	1.95E-06	1
OG0000882	LON_substr_bdg	AAA	5.05E-07	8.50E-08	2.05E-10	8.01E-10	1.81E-09	3.17E-09	3.25E-06	1
OG0000882	LON_substr_bdg	Lon_C	1.23E-06	2.56E-07	1.75E-09	5.41E-09	7.51E-09	3.97E-09	3.66E-06	1
OG0000889	PXA	Nexin_C	1.24E-07	1.76E-09	1.48E-11	2.25E-07	2.20E-03	1.13E-03	4.60E-03	1
OG0000889	PXA	PX	3.10E-08	6.44E-10	1.04E-11	2.30E-07	1.77E-03	7.42E-04	2.88E-03	1
OG0000889	PXA	RGS	7.06E-07	1.41E-07	2.60E-07	2.48E-03	5.30E-01	8.62E-02	2.93E-01	1
OG0000889	PX	Nexin_C	3.44E-08	7.07E-10	1.37E-11	4.13E-07	3.02E-03	1.21E-03	4.67E-03	1
OG0000889	RGS	Nexin_C	1.91E-05	1.48E-07	2.62E-07	2.50E-03	5.32E-01	8.59E-02	2.92E-01	1
OG0000889	RGS	PX	9.26E-07	1.63E-07	2.94E-07	2.60E-03	5.39E-01	8.50E-02	2.87E-01	1
OG0000891	Nudc_N	CS	3.43E-06	1.80E-06	6.98E-07	3.14E-03	1.94E-04	6.64E-04	1.13E-03	1
OG0000893	CH	IQ	7.62E-05	2.04E-06	4.43E-07	5.12E-04	8.86E-01	3.58E-02	6.15E-02	1
OG0000893	CH	RasGAP	7.61E-05	2.03E-06	4.42E-08	1.03E-04	1.78E-01	7.21E-03	1.24E-02	1
OG0000893	CH	RasGAP_C	7.61E-05	2.03E-06	4.42E-08	1.03E-04	1.78E-01	7.21E-03	1.24E-02	1
OG0000893	IQ	RasGAP	7.23E-06	2.04E-06	4.43E-07	5.12E-04	8.86E-01	3.58E-02	6.16E-02	1
OG0000893	IQ	RasGAP_C	6.55E-06	2.02E-06	4.41E-07	5.11E-04	8.86E-01	3.59E-02	6.16E-02	1
OG0000893	RasGAP	RasGAP_C	4.42E-07	2.31E-08	2.05E-10	2.09E-10	4.48E-09	1.42E-07	5.42E-03	1
OG0000898	AMP-binding	AMP-binding_C	1.17E-03	2.89E-07	1.48E-09	6.66E-09	5.52E-06	7.55E-05	2.34E-02	1
OG0000899	tRNA_SAD	DHHA1	1.90E-05	3.86E-04	1.51E-07	6.81E-08	8.23E-08	1.12E-08	8.26E-06	1
OG0000899	tRNA-synt_2c	DHHA1	1.90E-05	3.86E-04	1.51E-07	6.81E-08	8.23E-08	1.12E-08	8.26E-06	1
OG0000899	tRNA-synt_2c	tRNA_SAD	3.45E-07	5.44E-08	3.60E-12	2.23E-11	3.79E-11	4.15E-10	1.71E-06	1
OG0000904	BTB	BACK	1.06E-05	5.77E-04	1.35E-04	0.0018592923	7.05E-05	4.87E-04	2.93E-02	1
OG0000905	RNA_POL_M_15KD	TFIIS_C	7.04E-06	1.98E-06	6.25E-06	7.56E-08	2.81E-05	9.23E-07	7.72E-04	1
OG0000907	G8	Beta_helix	0.001058222	0.0326362633	0.0161974646	0.2294640434	2.24E-02	1.54E-01	2.69E-01	1
OG0000907	TIG	Beta_helix	1.96E-02	6.06E-01	0.3042583192	0.0557284919	0.0054739235	2.26E-04	3.88E-04	1
OG0000907	TIG	G8	0.0167453135	5.41E-01	2.73E-01	5.00E-02	4.90E-03	2.02E-04	3.45E-04	1
OG0000909	ARID	JmjC	1.64E-06	6.78E-07	7.85E-09	4.17E-07	6.16E-08	4.60E-07	1.92E-03	1
OG0000909	ARID	PHD	7.56E-05	2.01E-06	2.15E-08	1.38E-06	1.17E-05	3.96E-05	0.0023001973	1
OG0000909	ARID	PLU-1	0.0297327157	0.0012427182	4.35E-04	8.48E-03	7.70E-01	3.11E-02	5.34E-02	1
OG0000909	ARID	zf-C5HC2	4.43E-03	4.97E-06	2.85E-04	1.27E-03	1.16E-01	4.69E-03	2.72E-01	1
OG0000909	JmjC	PHD	7.64E-05	2.11E-06	6.75E-06	0.0086392817	0.784377449	0.0317205197	0.0544197373	1
OG0000909	JmjC	PLU-1	0.0630636244	2.91E-03	1.28E-03	6.07E-03	5.56E-01	2.25E-02	0.0385374493	1
OG0000909	JmjC	zf-C5HC2	4.14E-03	2.20E-06	2.01E-05	2.62E-07	3.37E-04	1.34E-05	7.62E-04	1
OG0000909	JmjN	ARID	9.77E-07	8.97E-07	1.45E-08	9.36E-07	2.56E-07	7.27E-07	2.16E-03	1
OG0000909	JmjN	JmjC	3.09E-06	1.35E-06	1.62E-08	5.31E-08	6.45E-08	7.71E-09	2.82E-06	1
OG0000909	JmjN	PHD	7.58E-05	2.02E-06	2.17E-08	1.33E-06	4.45E-06	1.49E-05	8.50E-04	1
OG0000909	JmjN	PLU-1	0.0797579055	0.0037087377	0.0016871966	8.03E-03	7.28E-01	2.94E-02	5.04E-02	1
OG0000909	JmjN	zf-C5HC2	0.0043686341	2.23E-06	2.03E-05	2.65E-07	3.41E-04	1.35E-05	7.65E-04	1
OG0000909	PHD	JmjC	7.58E-05	2.01E-06	2.15E-08	1.30E-06	4.42E-06	1.49E-05	8.49E-04	1
OG0000909	PHD	PLU-1	0.0298443428	0.0012409927	4.34E-04	8.47E-03	7.69E-01	3.11E-02	5.33E-02	1
OG0000909	PHD	zf-C5HC2	0.0045702509	4.92E-06	2.85E-04	1.27E-03	1.16E-01	4.70E-03	2.72E-01	1
OG0000909	PLU-1	PHD	0.0298857749	0.0012416187	4.35E-04	8.47E-03	7.69E-01	3.11E-02	5.33E-02	1
OG0000909	zf-C5HC2	PHD	0.0049748999	2.10E-05	0.0018296182	8.65E-03	7.83E-01	3.16E-02	5.43E-02	1
OG0000909	zf-C5HC2	PLU-1	0.0638576763	0.0029218787	0.0012876487	6.11E-03	5.55E-01	2.25E-02	3.85E-02	1
OG0000910	AAA	Rep_fac_C	3.67E-08	1.08E-08	9.58E-12	1.64E-10	8.16E-10	1.54E-09	7.90E-07	1
OG0000916	MMR_HSR1	MMR_HSR1_Xtn	1.81E-08	6.58E-09	1.02E-13	9.30E-13	1.32E-11	2.78E-10	5.81E-07	1
OG0000916	MMR_HSR1	TGS	1.81E-08	6.58E-09	1.02E-13	9.30E-13	1.32E-11	2.78E-10	5.81E-07	1
OG0000916	MMR_HSR1_Xtn	TGS	1.81E-08	6.58E-09	1.02E-13	9.30E-13	1.32E-11	2.78E-10	5.81E-07	1
OG0000920	Pkinase	Ribonuc_2-5A	5.95E-06	1.78E-06	1.89E-08	1.08E-06	6.85E-08	7.71E-09	5.95E-06	1
OG0000924	EF-hand_8	WD40	0.0344246635	1.01E-01	5.06E-02	7.17E-01	7.03E-02	2.85E-03	4.88E-03	1
OG0000926	ubiquitin	zf-AN1	2.91E-04	6.38E-04	1.25E-04	3.53E-01	5.72E-01	2.31E-02	3.97E-02	1
OG0000926	zf-A20	zf-AN1	5.84E-06	1.84E-06	4.11E-08	6.49E-05	6.03E-07	1.84E-06	6.57E-04	1
OG0000927	PSI	Plexin_cytopl	0.1296870379	0.5348206791	0.2785040484	5.13E-02	5.04E-03	2.09E-04	3.58E-04	1
OG0000927	PSI	TIG	0.0730943081	0.5547917334	0.3083683578	5.74E-02	5.65E-03	2.33E-04	4.00E-04	1
OG0000927	Sema	Plexin_cytopl	0.9211591242	0.0486370009	0.0245985319	4.54E-03	4.55E-04	2.32E-05	4.02E-05	0
OG0000927	Sema	PSI	0.8917630768	0.0667797935	0.0344053886	0.0063580887	6.33E-04	3.04E-05	5.26E-05	1
OG0000927	Sema	TIG	0.8867971469	0.0698626339	0.0360831822	6.67E-03	6.64E-04	3.16E-05	5.47E-05	1
OG0000927	TIG	Plexin_cytopl	0.1242841664	0.5370318217	0.2811161457	5.18E-02	5.10E-03	2.11E-04	3.62E-04	1
OG0000928	Pro-kuma_activ	Peptidase_S8	1.24E-06	2.91E-08	1.73E-08	2.04E-06	4.66E-11	4.52E-11	1.66E-06	1
OG0000930	XPG_N	XPG_I	1.44E-06	5.54E-07	5.33E-09	1.53E-08	1.90E-08	2.80E-09	2.46E-06	1
OG0000932	DnaJ_C	DnaJ_CXXCXGXG	7.18E-05	1.85E-06	1.91E-08	6.09E-08	7.33E-08	8.41E-09	3.30E-06	1
OG0000932	DnaJ	DnaJ_C	3.32E-05	5.71E-07	3.92E-09	1.09E-08	1.29E-08	1.36E-09	1.30E-06	1
OG0000932	DnaJ	DnaJ_CXXCXGXG	6.78E-05	1.81E-06	1.88E-08	6.00E-08	7.24E-08	8.49E-09	3.75E-06	1
OG0000934	Sas10_Utp3	Sas10	0.0045451045	2.02E-06	2.16E-08	1.30E-06	1.02E-07	7.64E-08	6.42E-06	1
OG0000936	DUF1899	WD40	2.18E-07	1.09E-08	1.01E-10	2.07E-10	1.32E-10	4.34E-10	6.48E-06	1
OG0000936	DUF1899	WD40_4	1.77E-07	4.65E-09	1.43E-12	1.37E-12	1.01E-11	2.19E-10	2.91E-06	1
OG0000936	WD40_4	DUF1899	0.0045735119	2.02E-06	2.41E-08	1.79E-06	3.03E-05	1.03E-04	0.2679548414	1
OG0000936	WD40_4	WD40	0.0045882309	2.48E-06	4.41E-05	7.16E-05	3.66E-06	1.22E-05	3.17E-02	1
OG0000936	WD40	DUF1899	0.0045824415	2.30E-06	2.61E-05	2.51E-06	8.93E-05	3.04E-04	0.7898388628	1
OG0000936	WD40	WD40_4	1.70E-07	7.65E-09	4.24E-11	3.10E-11	3.08E-11	3.74E-10	5.44E-06	1
OG0000938	RRM_6	RRM_1	0.0011449043	1.44E-03	5.30E-04	7.29E-08	7.30E-07	2.22E-06	7.72E-04	1
OG0000941	DBINO	Helicase_C	7.60E-05	2.01E-06	2.12E-08	7.18E-08	7.55E-06	3.73E-08	7.63E-05	1
OG0000941	DBINO	SNF2_N	7.58E-05	2.01E-06	2.12E-08	7.18E-08	7.55E-06	3.73E-08	7.63E-05	1
OG0000941	HSA	Helicase_C	7.82E-05	7.64E-06	5.38E-04	1.33E-06	8.94E-08	3.38E-08	6.59E-06	1
OG0000941	HSA	SNF2_N	7.58E-05	2.10E-06	6.93E-06	1.33E-06	8.92E-08	3.38E-08	6.58E-06	1
OG0000941	SNF2_N	Helicase_C	1.56E-06	2.61E-08	4.91E-10	1.47E-09	1.96E-09	6.40E-10	1.59E-06	1
[truncated: 2,373 more rows]
