# Supplementary figures and images for: Dynamics of genomic innovation in the unicellular ancestry of animals
Source: eLife journal article supplement (doi:10.7554/elife.26036), 2017-07-20

# Figure 1-Supplement 1

Pair-wise comparisons of 1-to-1 orthologs' lengths

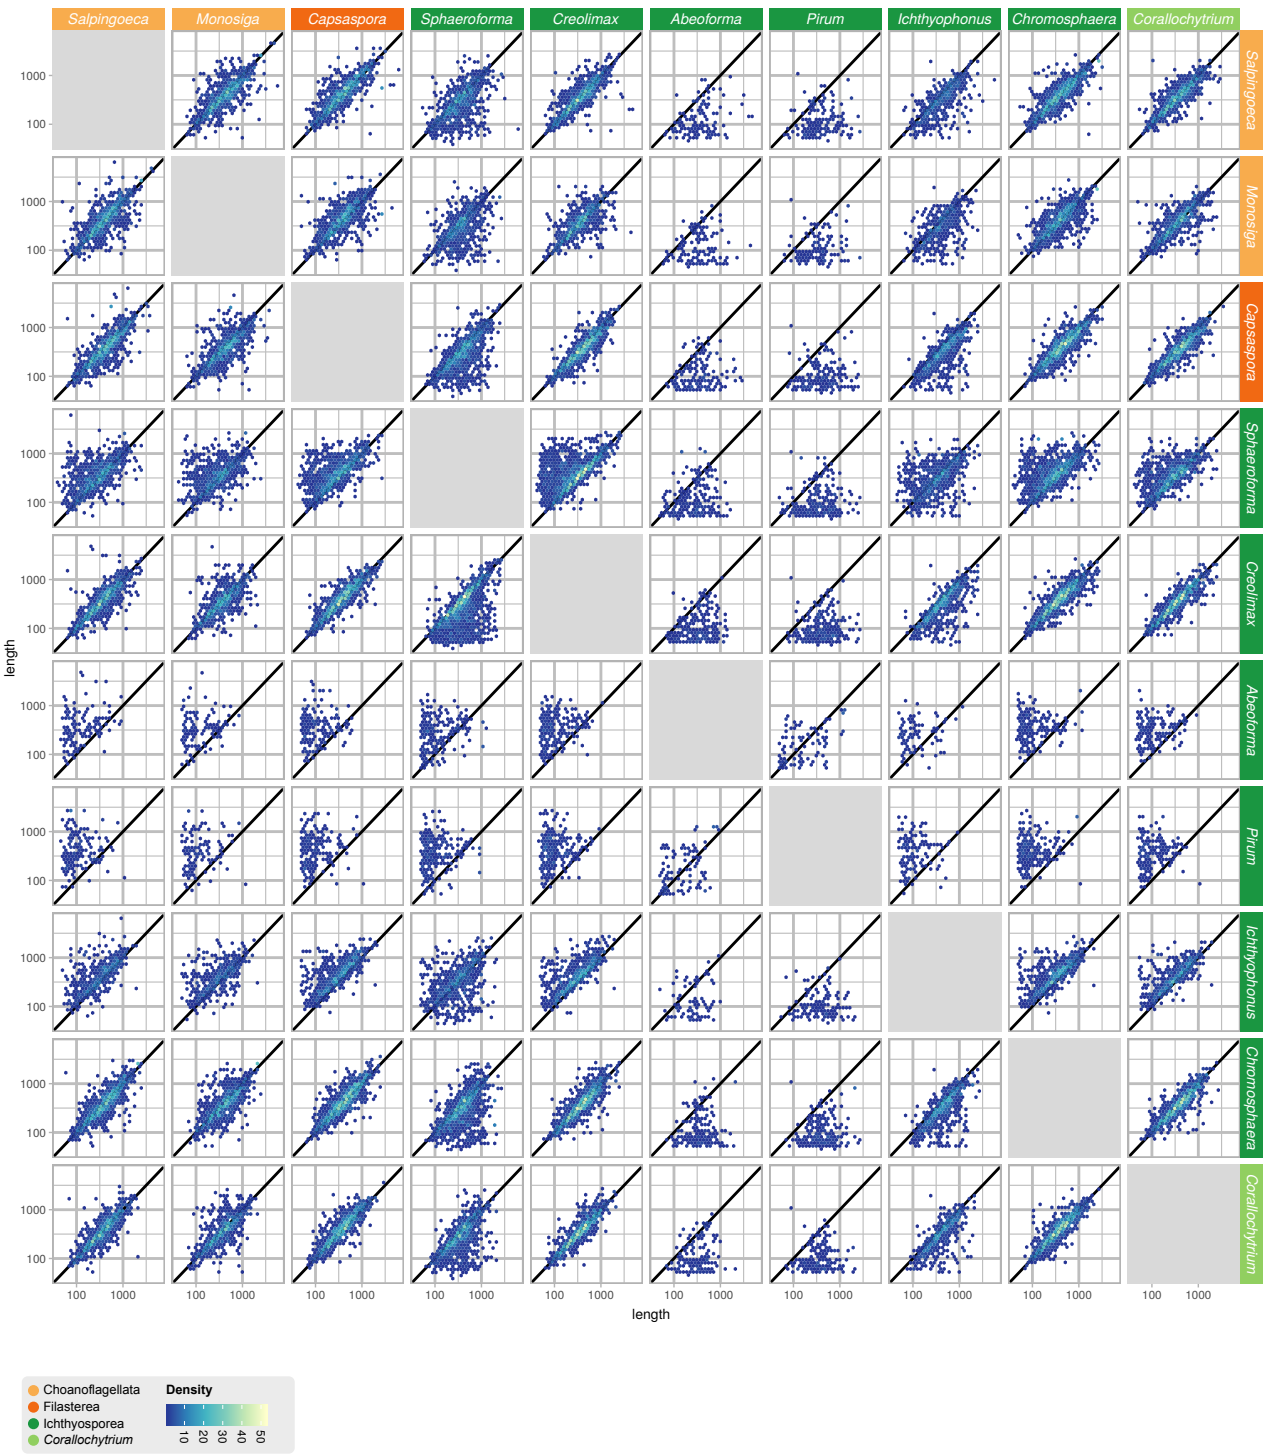

Supplement: supp [file elife-26036-supp-v1.zip]

# Figure 3-Supplement 3

A. Synteny conservation between unicellular and multicellular Holozoa

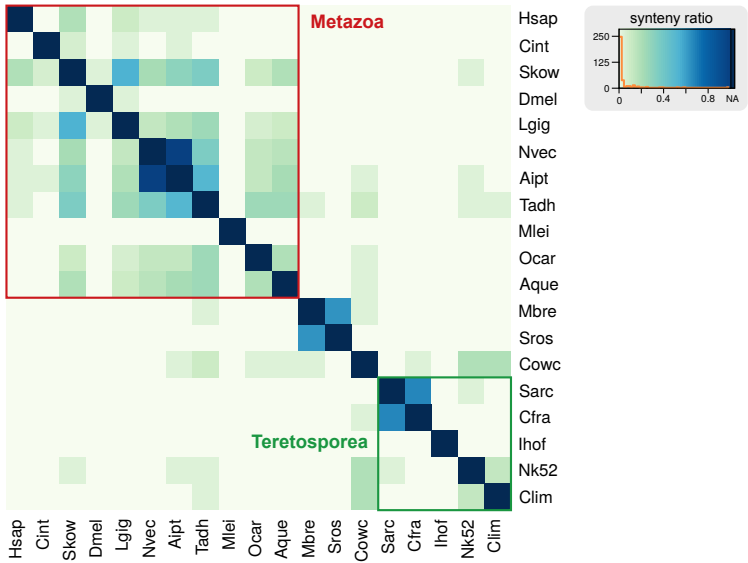

Supplement: supp [file elife-26036-supp-v1.zip]

# Figure 5-Supplement 1

## A. Intron site classification

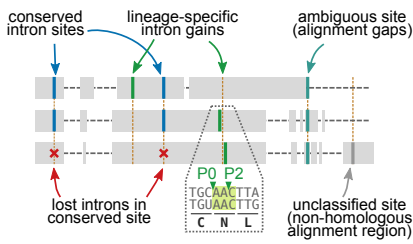

Supplement: supp [file elife-26036-supp-v1.zip]

### Figure 9-Supplement 1

### A. LIM Homeobox: ML/BI

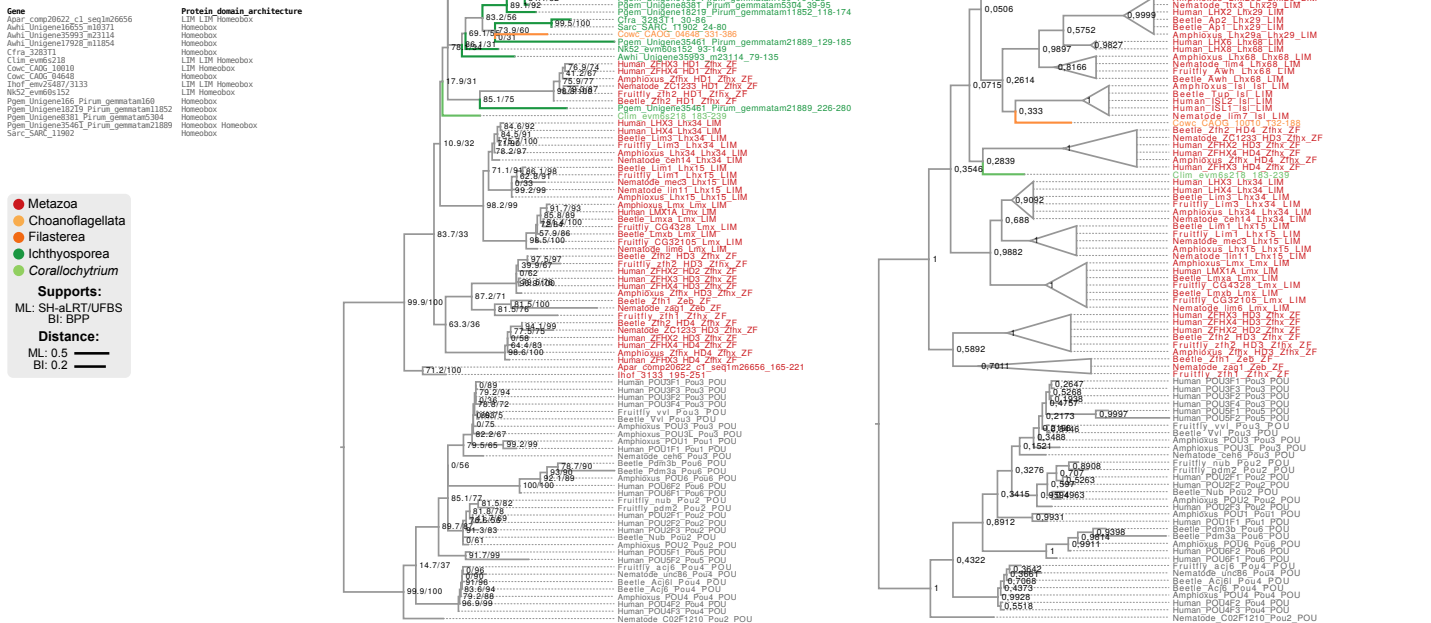

**B. p300/CBP: ML/BI**

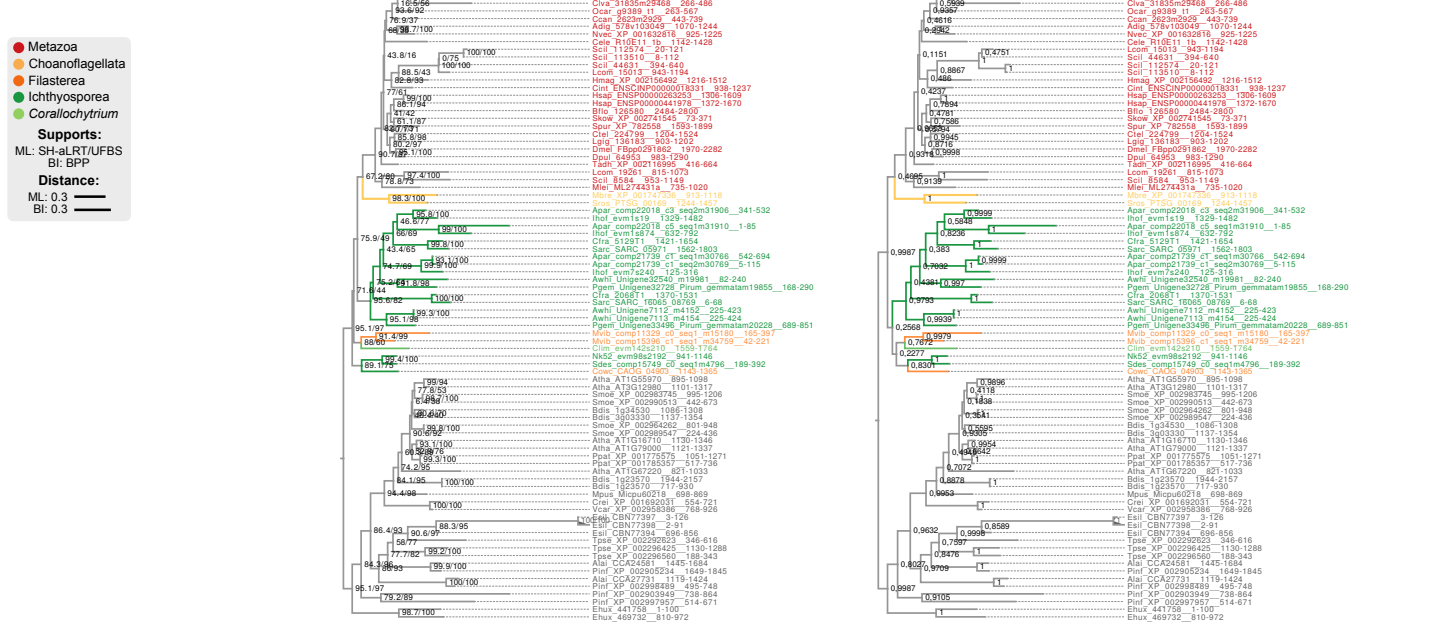

### C. Type IV Collagen: ML/BI

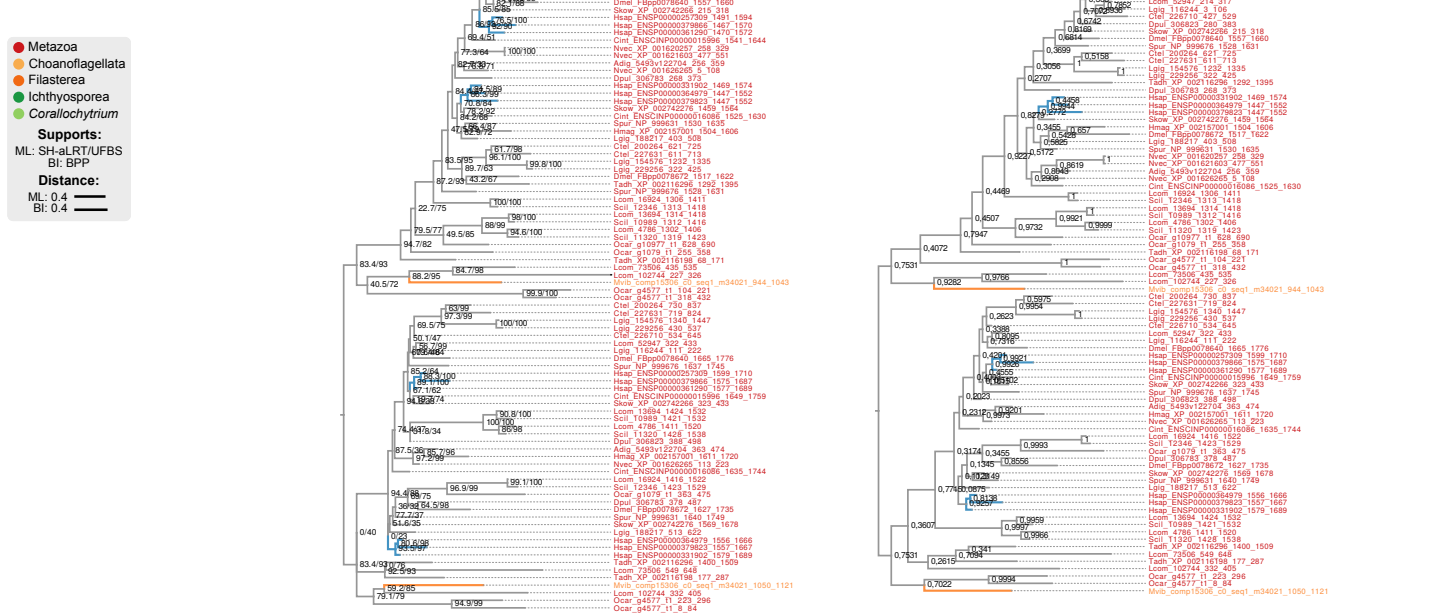

Supplement: supp [file elife-26036-supp-v1.zip › elife_poa_e26036_Figure_9_Figure_Supplement_1.pdf]

**A**

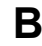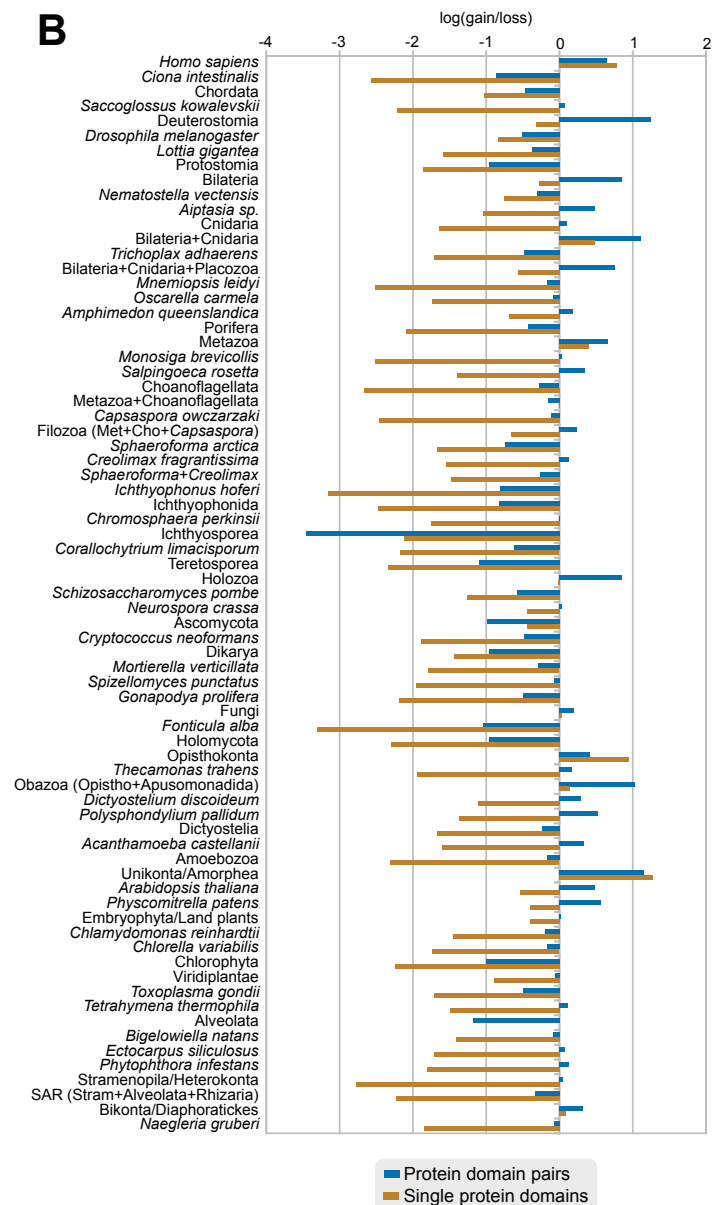

Supplement: supp [file elife-26036-supp-v1.zip › elife_poa_e26036_Figure_7_Figure_Supplement_1.pdf]

Figure 8-Supplement 1

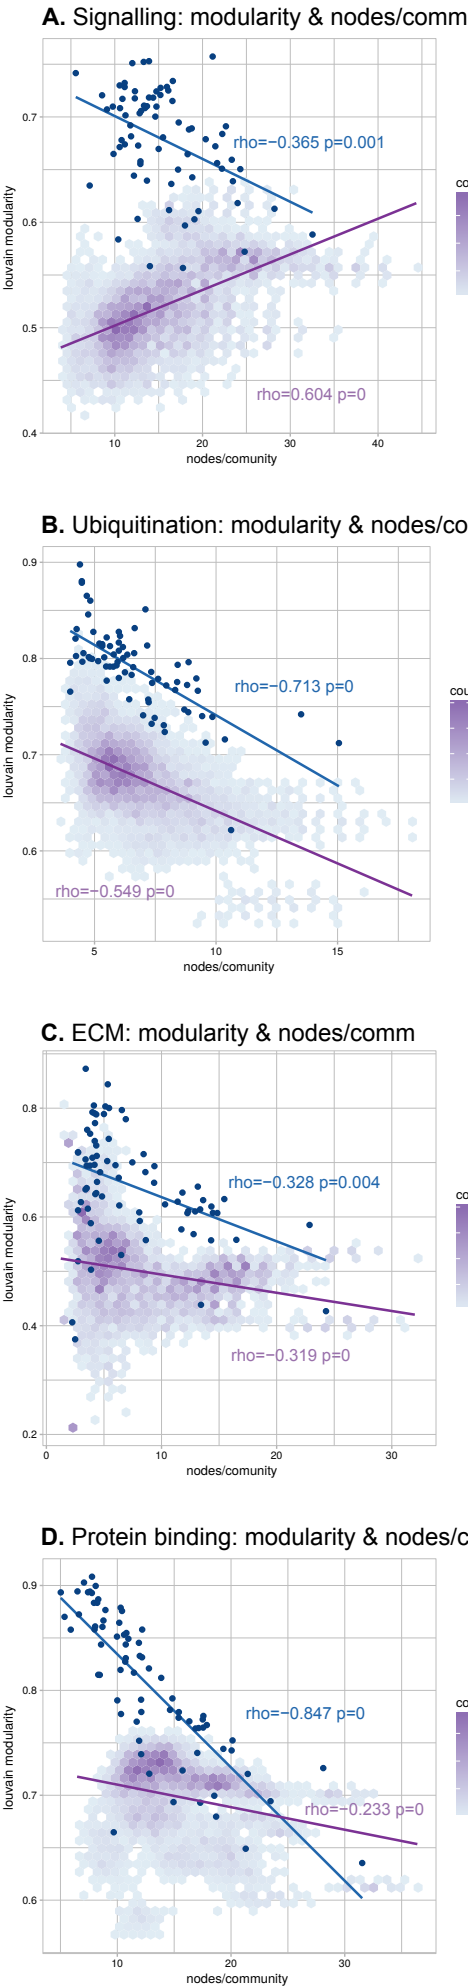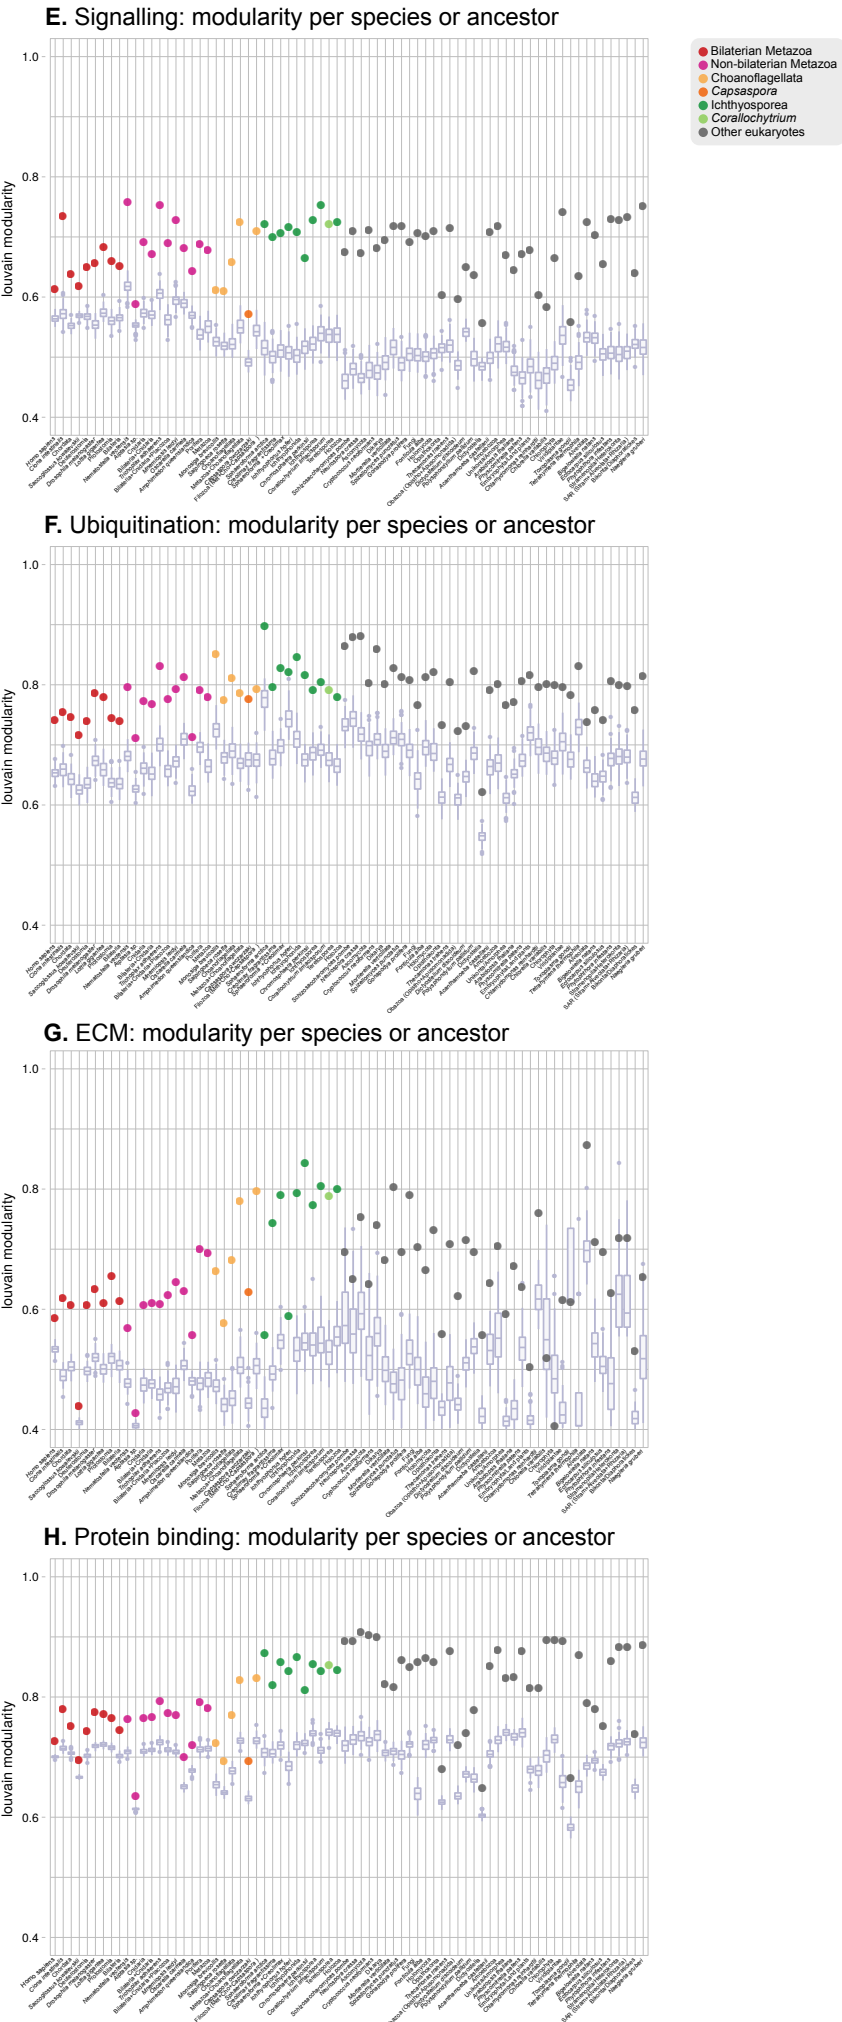

Supplement: supp [file elife-26036-supp-v1.zip › elife_poa_e26036_Figure_8_Figure_Supplement_1.pdf]

Figure 5-Supplement 2

A. NMD machinery

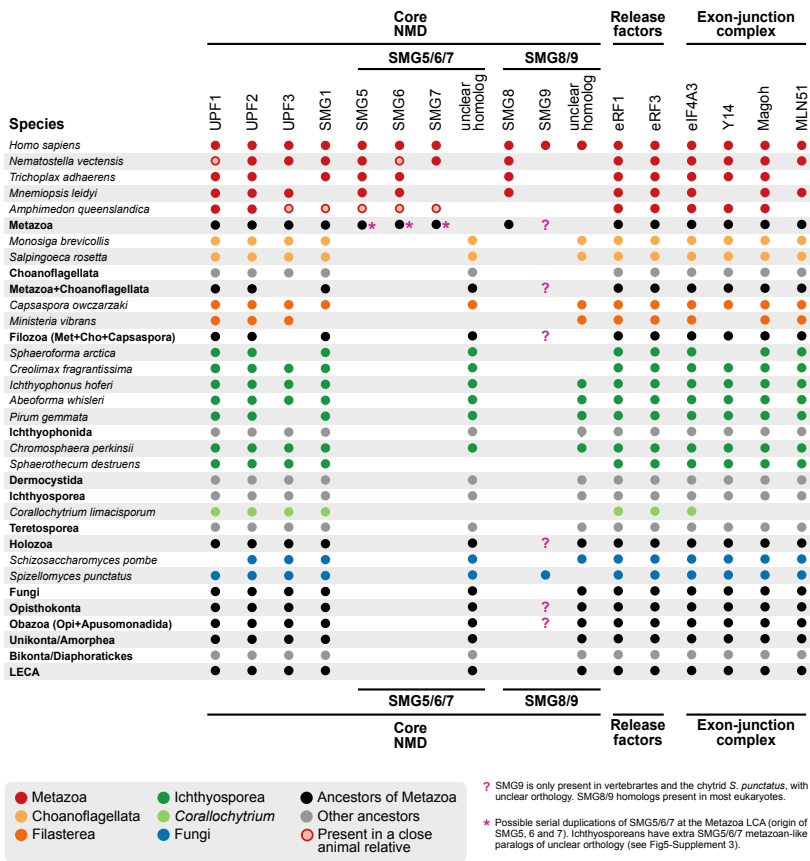

B. SR splicing factors

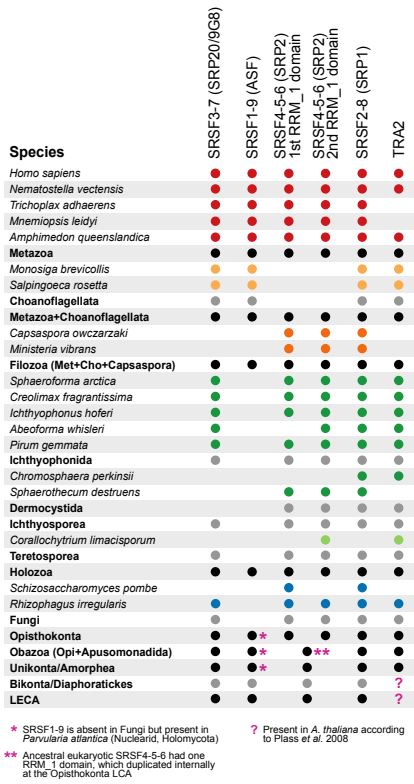

C. RNA-binding domains

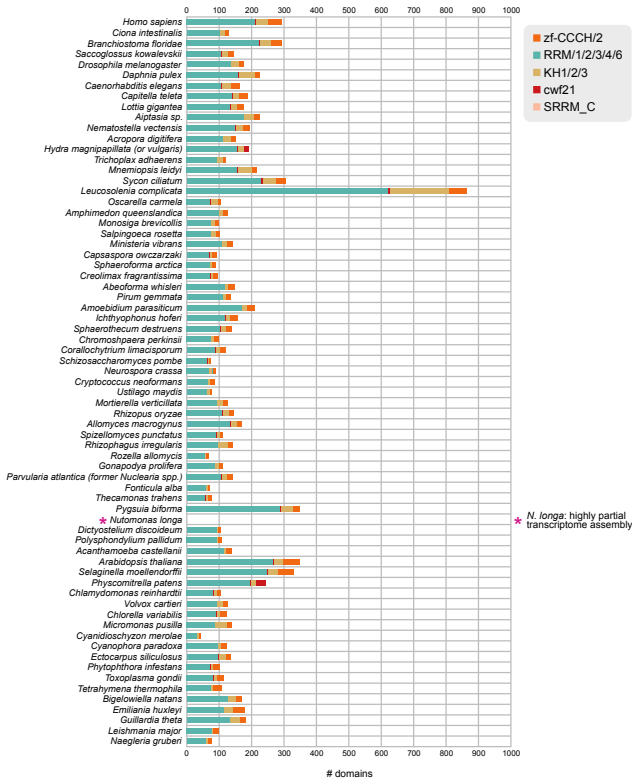

Supplement: supp [file elife-26036-supp-v1.zip › elife_poa_e26036_Figure_5_Figure_Supplement_2.pdf]
